# Supplementary material for: Functional annotation of proteins for signaling network inference in non-model species
Source: Research Square preprint supplement (doi:10.21203/rs.3.rs-2201240/v1), 2022-11-11
Supplement: Supplementary file 1 [file 4fc9e70e7e260f17efd969d1.xlsx]

## Sheet: a2
Supplementary Table S5 - PF-NET predictions for the entire soybean proteome (reference: assembly 2 annotation 1).
ID	Gene_name	PF3	PF2	PF1	Pred3	Pred2	Pred1
glyma.Wm82.gnm2.ann1.Glyma.10G030500.1	Glyma.10G030500	PF13499	PF00571	PF02036	0.0840449	0.113472	0.161026
glyma.Wm82.gnm2.ann1.Glyma.10G053100.1	Glyma.10G053100	PF11976	PF01918	PF13881	0.0582563	0.0712975	0.164627
glyma.Wm82.gnm2.ann1.Glyma.10G008400.1	Glyma.10G008400	PF00168	PF00089	PF05678	0.0506815	0.0592636	0.164367
glyma.Wm82.gnm2.ann1.Glyma.10G106600.1	Glyma.10G106600	PF00082	PF00933	PF01915	0.000164086	0.00726372	0.992518
glyma.Wm82.gnm2.ann1.Glyma.10G164600.1	Glyma.10G164600	PF05699	PF00361	PF05603	0.0402162	0.0434559	0.0435014
glyma.Wm82.gnm2.ann1.Glyma.10G247300.1	Glyma.10G247300	PF05419	PF09412	PF00622	0.135726	0.168153	0.218061
glyma.Wm82.gnm2.ann1.Glyma.10G150400.1	Glyma.10G150400	PF08268	PF12937	PF00646	0.0156235	0.115336	0.849076
glyma.Wm82.gnm2.ann1.Glyma.10G122700.1	Glyma.10G122700	PF06839	PF00059	PF02953	0.0645639	0.0804997	0.0943214
glyma.Wm82.gnm2.ann1.Glyma.10G129600.1	Glyma.10G129600	PF00271	PF13086	PF00176	0.0832219	0.128613	0.337082
glyma.Wm82.gnm2.ann1.Glyma.10G120300.1	Glyma.10G120300	PF01636	PF07714	PF00069	9.40952e-06	0.00659046	0.993385
glyma.Wm82.gnm2.ann1.Glyma.10G120300.2	Glyma.10G120300	PF01636	PF07714	PF00069	9.40952e-06	0.00659046	0.993385
glyma.Wm82.gnm2.ann1.Glyma.10G157800.1	Glyma.10G157800	PF10241	PF09763	PF05303	0.0825655	0.11684	0.282791
glyma.Wm82.gnm2.ann1.Glyma.10G143700.1	Glyma.10G143700	PF02867	PF05699	PF00564	0.0140011	0.0146126	0.94789
glyma.Wm82.gnm2.ann1.Glyma.10G143700.2	Glyma.10G143700	PF02867	PF05699	PF00564	0.0140011	0.0146126	0.94789
glyma.Wm82.gnm2.ann1.Glyma.10G074800.1	Glyma.10G074800	PF13570	PF13088	PF00251	0.0150292	0.0229483	0.930384
glyma.Wm82.gnm2.ann1.Glyma.10G220800.1	Glyma.10G220800	PF00031	PF03101	PF03108	0.0383939	0.21154	0.360204
glyma.Wm82.gnm2.ann1.Glyma.10G220800.2	Glyma.10G220800	PF12776	PF14303	PF06839	0.0331237	0.0903052	0.266085
glyma.Wm82.gnm2.ann1.Glyma.10G128500.1	Glyma.10G128500	PF03467	PF00447	PF00076	0.0065652	0.00658415	0.938307
glyma.Wm82.gnm2.ann1.Glyma.10G041700.4	Glyma.10G041700	PF00076	PF00169	PF10377	0.039782	0.0529605	0.0532554
glyma.Wm82.gnm2.ann1.Glyma.10G001300.1	Glyma.10G001300	PF01466	PF00857	PF13456	0.0609759	0.0967985	0.116337
glyma.Wm82.gnm2.ann1.Glyma.10G175400.1	Glyma.10G175400	PF13840	PF00857	PF00027	0.053545	0.0558455	0.0969257
glyma.Wm82.gnm2.ann1.Glyma.10G175400.2	Glyma.10G175400	PF00294	PF13456	PF13840	0.0698676	0.077265	0.0913697
glyma.Wm82.gnm2.ann1.Glyma.10G161900.1	Glyma.10G161900	PF00550	PF13499	PF01814	0.0573507	0.106367	0.386808
glyma.Wm82.gnm2.ann1.Glyma.10G082200.1	Glyma.10G082200	PF00293	PF11835	PF00076	0.00516149	0.00756002	0.915883
glyma.Wm82.gnm2.ann1.Glyma.10G051300.1	Glyma.10G051300	PF01794	PF07884	PF00361	0.0423694	0.0445349	0.08301
glyma.Wm82.gnm2.ann1.Glyma.10G249100.1	Glyma.10G249100	PF01636	PF10536	PF00454	0.0775767	0.0789521	0.105905
glyma.Wm82.gnm2.ann1.Glyma.10G029400.1	Glyma.10G029400	PF01061	PF00892	PF04893	0.0916264	0.272471	0.395633
glyma.Wm82.gnm2.ann1.Glyma.10G293400.1	Glyma.10G293400	PF01794	PF00361	PF03798	0.0983807	0.169445	0.21545
glyma.Wm82.gnm2.ann1.Glyma.10G063900.1	Glyma.10G063900	PF02854	PF08172	PF10377	0.0415313	0.0742466	0.0768247
glyma.Wm82.gnm2.ann1.Glyma.10G156100.1	Glyma.10G156100	PF00462	PF00098	PF00403	0.000480992	0.00059227	0.997882
glyma.Wm82.gnm2.ann1.Glyma.10G055400.1	Glyma.10G055400	PF02866	PF00171	PF00180	0.0619381	0.0781638	0.0949815
glyma.Wm82.gnm2.ann1.Glyma.10G035500.1	Glyma.10G035500	PF17862	PF00171	PF00271	0.0242379	0.0301479	0.0358166
glyma.Wm82.gnm2.ann1.Glyma.10G051400.1	Glyma.10G051400	PF10496	PF09177	PF05008	0.184517	0.267835	0.52895
glyma.Wm82.gnm2.ann1.Glyma.10G051400.2	Glyma.10G051400	PF10496	PF09177	PF05008	0.184517	0.267835	0.52895
glyma.Wm82.gnm2.ann1.Glyma.10G253600.1	Glyma.10G253600	PF00031	PF14380	PF04043	0.101133	0.15664	0.266307
glyma.Wm82.gnm2.ann1.Glyma.10G120100.1	Glyma.10G120100	PF01648	PF02784	PF13302	0.0468871	0.0486446	0.0563279
glyma.Wm82.gnm2.ann1.Glyma.10G290600.1	Glyma.10G290600	PF00892	PF01699	PF00909	0.0609434	0.197572	0.572033
glyma.Wm82.gnm2.ann1.Glyma.10G071000.1	Glyma.10G071000	PF16656	PF00884	PF00149	0.00201587	0.00319427	0.992187
glyma.Wm82.gnm2.ann1.Glyma.10G097100.1	Glyma.10G097100	PF00011	PF02037	PF04774	0.0562818	0.0918396	0.386133
glyma.Wm82.gnm2.ann1.Glyma.10G267100.3	Glyma.10G267100	PF00903	PF04059	PF00076	0.00088981	0.00744996	0.989515
glyma.Wm82.gnm2.ann1.Glyma.10G267100.1	Glyma.10G267100	PF00903	PF04059	PF00076	0.00088981	0.00744996	0.989515
glyma.Wm82.gnm2.ann1.Glyma.10G267100.6	Glyma.10G267100	PF00903	PF04059	PF00076	0.00088981	0.00744996	0.989515
glyma.Wm82.gnm2.ann1.Glyma.10G267100.2	Glyma.10G267100	PF00903	PF04059	PF00076	0.000846359	0.00141225	0.995685
glyma.Wm82.gnm2.ann1.Glyma.10G267100.4	Glyma.10G267100	PF00903	PF04059	PF00076	0.000846359	0.00141225	0.995685
glyma.Wm82.gnm2.ann1.Glyma.10G267100.5	Glyma.10G267100	PF00903	PF04059	PF00076	0.00128915	0.00685979	0.987466
glyma.Wm82.gnm2.ann1.Glyma.10G198900.1	Glyma.10G198900	PF01592	PF00730	PF00042	0.00143141	0.00325159	0.978001
glyma.Wm82.gnm2.ann1.Glyma.10G168000.1	Glyma.10G168000	PF03732	PF02617	PF00141	0.0362852	0.0497798	0.0971269
glyma.Wm82.gnm2.ann1.Glyma.10G184500.1	Glyma.10G184500	PF00098	PF02892	PF12171	0.0591096	0.336568	0.421096
glyma.Wm82.gnm2.ann1.Glyma.10G262300.1	Glyma.10G262300	PF01061	PF06454	PF03798	0.0609916	0.106727	0.639892
glyma.Wm82.gnm2.ann1.Glyma.10G262300.2	Glyma.10G262300	PF14360	PF06454	PF03798	0.0618651	0.0875176	0.632792
glyma.Wm82.gnm2.ann1.Glyma.10G019200.1	Glyma.10G019200	PF13180	PF17942	PF00498	0.0819154	0.0824657	0.104069
glyma.Wm82.gnm2.ann1.Glyma.10G019200.5	Glyma.10G019200	PF01823	PF00168	PF17942	0.078421	0.0838875	0.202473
glyma.Wm82.gnm2.ann1.Glyma.10G019200.2	Glyma.10G019200	PF00498	PF13180	PF17942	0.105849	0.106522	0.133719
glyma.Wm82.gnm2.ann1.Glyma.10G019200.3	Glyma.10G019200	PF01661	PF13180	PF17942	0.0579991	0.093782	0.266001
glyma.Wm82.gnm2.ann1.Glyma.10G019200.4	Glyma.10G019200	PF09133	PF00498	PF00169	0.0430041	0.0631477	0.100318
glyma.Wm82.gnm2.ann1.Glyma.10G019200.6	Glyma.10G019200	PF01661	PF13180	PF17942	0.0598241	0.0878478	0.319543
glyma.Wm82.gnm2.ann1.Glyma.10G019200.7	Glyma.10G019200	PF01661	PF13180	PF17942	0.0598241	0.0878478	0.319543
glyma.Wm82.gnm2.ann1.Glyma.10G019200.8	Glyma.10G019200	PF03828	PF00010	PF17942	0.0604718	0.0722365	0.237464
glyma.Wm82.gnm2.ann1.Glyma.10G019200.10	Glyma.10G019200	PF07522	PF01661	PF03828	0.0681846	0.079351	0.141548
glyma.Wm82.gnm2.ann1.Glyma.10G019200.9	Glyma.10G019200	PF00557	PF07522	PF01661	0.0847274	0.102342	0.141757
glyma.Wm82.gnm2.ann1.Glyma.10G170700.1	Glyma.10G170700	PF14547	PF14368	PF00234	0.110113	0.149617	0.396359
glyma.Wm82.gnm2.ann1.Glyma.10G118500.1	Glyma.10G118500	PF00754	PF07732	PF00246	0.0619444	0.0655415	0.0903215
glyma.Wm82.gnm2.ann1.Glyma.10G279000.1	Glyma.10G279000	PF12076	PF00102	PF00782	0.00889639	0.251486	0.735302
glyma.Wm82.gnm2.ann1.Glyma.10G089600.1	Glyma.10G089600	PF02784	PF00291	PF00155	0.112217	0.122609	0.162176
glyma.Wm82.gnm2.ann1.Glyma.10G089600.2	Glyma.10G089600	PF00155	PF00266	PF01180	0.0606887	0.0655916	0.191123
glyma.Wm82.gnm2.ann1.Glyma.10G089600.3	Glyma.10G089600	PF00155	PF00266	PF01180	0.0606887	0.0655916	0.191123
glyma.Wm82.gnm2.ann1.Glyma.10G230800.1	Glyma.10G230800	PF13919	PF02037	PF05678	0.0580551	0.117826	0.348757
glyma.Wm82.gnm2.ann1.Glyma.10G051500.2	Glyma.10G051500	PF02892	PF12756	PF12171	0.0212641	0.0992789	0.864019
glyma.Wm82.gnm2.ann1.Glyma.10G051500.3	Glyma.10G051500	PF02892	PF12756	PF12171	0.0212641	0.0992789	0.864019
glyma.Wm82.gnm2.ann1.Glyma.10G051500.1	Glyma.10G051500	PF02892	PF12756	PF12171	0.0212641	0.0992789	0.864019
glyma.Wm82.gnm2.ann1.Glyma.10G051500.4	Glyma.10G051500	PF02892	PF12756	PF12171	0.0212641	0.0992789	0.864019
glyma.Wm82.gnm2.ann1.Glyma.10G109400.1	Glyma.10G109400	PF05199	PF00069	PF00089	0.0300526	0.0332116	0.109528
glyma.Wm82.gnm2.ann1.Glyma.10G109400.2	Glyma.10G109400	PF05199	PF00069	PF00089	0.0300526	0.0332116	0.109528
glyma.Wm82.gnm2.ann1.Glyma.10G109400.3	Glyma.10G109400	PF05199	PF00069	PF00089	0.0300526	0.0332116	0.109528
glyma.Wm82.gnm2.ann1.Glyma.10G109400.4	Glyma.10G109400	PF01565	PF05678	PF00089	0.0463762	0.105725	0.106327
glyma.Wm82.gnm2.ann1.Glyma.10G109400.5	Glyma.10G109400	PF01565	PF05678	PF00089	0.0463762	0.105725	0.106327
glyma.Wm82.gnm2.ann1.Glyma.10G012400.1	Glyma.10G012400	PF01578	PF07298	PF01794	0.129705	0.171855	0.275492
glyma.Wm82.gnm2.ann1.Glyma.10G088700.1	Glyma.10G088700	PF02362	PF08268	PF03478	0.0381048	0.0455079	0.840678
glyma.Wm82.gnm2.ann1.Glyma.10G029800.1	Glyma.10G029800	PF00454	PF13640	PF00856	0.0865168	0.123784	0.149886
glyma.Wm82.gnm2.ann1.Glyma.10G223000.1	Glyma.10G223000	PF01464	PF00188	PF04043	0.00534473	0.0065623	0.973083
glyma.Wm82.gnm2.ann1.Glyma.10G177800.1	Glyma.10G177800	PF02845	PF05703	PF13259	0.0927052	0.110289	0.131247
glyma.Wm82.gnm2.ann1.Glyma.10G038800.1	Glyma.10G038800	PF02469	PF00026	PF11721	0.201537	0.244264	0.303429
glyma.Wm82.gnm2.ann1.Glyma.10G100000.1	Glyma.10G100000	PF00059	PF02140	PF00089	0.0716862	0.105387	0.215653
glyma.Wm82.gnm2.ann1.Glyma.10G116800.1	Glyma.10G116800	PF00439	PF00615	PF00855	0.0757794	0.104991	0.588572
glyma.Wm82.gnm2.ann1.Glyma.10G116800.2	Glyma.10G116800	PF00439	PF00615	PF00855	0.0757794	0.104991	0.588572
glyma.Wm82.gnm2.ann1.Glyma.10G116800.3	Glyma.10G116800	PF00439	PF00615	PF00855	0.074331	0.0999613	0.585739
glyma.Wm82.gnm2.ann1.Glyma.10G257300.1	Glyma.10G257300	PF00059	PF00754	PF02225	0.0515833	0.0708675	0.608082
glyma.Wm82.gnm2.ann1.Glyma.10G036200.1	Glyma.10G036200	PF00134	PF03732	PF00615	0.0415067	0.0728812	0.1332
glyma.Wm82.gnm2.ann1.Glyma.10G107400.1	Glyma.10G107400	PF09325	PF16740	PF05008	0.145077	0.167777	0.346767
glyma.Wm82.gnm2.ann1.Glyma.10G060400.1	Glyma.10G060400	PF00135	PF05199	PF00011	0.024832	0.0352759	0.0686833
glyma.Wm82.gnm2.ann1.Glyma.10G263400.1	Glyma.10G263400	PF07731	PF00127	PF02298	0.0269783	0.0293749	0.728592
glyma.Wm82.gnm2.ann1.Glyma.10G263400.2	Glyma.10G263400	PF07732	PF03168	PF00139	0.0750776	0.0911906	0.135307
glyma.Wm82.gnm2.ann1.Glyma.10G219200.1	Glyma.10G219200	PF00127	PF07731	PF07732	0.00769438	0.181012	0.802847
glyma.Wm82.gnm2.ann1.Glyma.10G056500.1	Glyma.10G056500	PF00581	PF00076	PF00578	0.0575213	0.0657137	0.0761204
glyma.Wm82.gnm2.ann1.Glyma.10G144800.4	Glyma.10G144800	PF00117	PF01975	PF01661	0.0608359	0.109666	0.149886
glyma.Wm82.gnm2.ann1.Glyma.10G144800.1	Glyma.10G144800	PF00117	PF01975	PF01661	0.0608359	0.109666	0.149886
glyma.Wm82.gnm2.ann1.Glyma.10G144800.2	Glyma.10G144800	PF00117	PF01975	PF01661	0.060836	0.109665	0.149886
glyma.Wm82.gnm2.ann1.Glyma.10G144800.3	Glyma.10G144800	PF00117	PF01975	PF01661	0.060836	0.109665	0.149886
glyma.Wm82.gnm2.ann1.Glyma.10G144800.5	Glyma.10G144800	PF00117	PF01975	PF01661	0.060836	0.109665	0.149886
glyma.Wm82.gnm2.ann1.Glyma.10G222800.1	Glyma.10G222800	PF02338	PF00024	PF00856	0.000327122	0.000498042	0.996655
glyma.Wm82.gnm2.ann1.Glyma.10G146200.1	Glyma.10G146200	PF00347	PF00327	PF05047	0.0475067	0.112121	0.330497
glyma.Wm82.gnm2.ann1.Glyma.10G243600.1	Glyma.10G243600	PF01979	PF01261	PF00248	9.0555e-07	1.95033e-06	0.999991
glyma.Wm82.gnm2.ann1.Glyma.10G243600.3	Glyma.10G243600	PF00365	PF01261	PF00248	1.13566e-06	4.62423e-06	0.99999
glyma.Wm82.gnm2.ann1.Glyma.10G243600.4	Glyma.10G243600	PF01902	PF01261	PF00248	1.88946e-06	5.23723e-06	0.999988
glyma.Wm82.gnm2.ann1.Glyma.10G243600.2	Glyma.10G243600	PF10075	PF01425	PF00248	0.00538988	0.0077739	0.9418
glyma.Wm82.gnm2.ann1.Glyma.10G205000.3	Glyma.10G205000	PF00170	PF14379	PF00010	0.00461952	0.00939541	0.983023
glyma.Wm82.gnm2.ann1.Glyma.10G205000.2	Glyma.10G205000	PF00170	PF14379	PF00010	0.00461952	0.00939541	0.983023
glyma.Wm82.gnm2.ann1.Glyma.10G205000.1	Glyma.10G205000	PF00170	PF14379	PF00010	0.00461952	0.00939541	0.983023
glyma.Wm82.gnm2.ann1.Glyma.10G281700.1	Glyma.10G281700	PF16205	PF01775	PF03101	0.0768074	0.148334	0.266136
glyma.Wm82.gnm2.ann1.Glyma.10G079300.1	Glyma.10G079300	PF05617	PF11938	PF02320	0.0542643	0.0755461	0.40446
glyma.Wm82.gnm2.ann1.Glyma.10G221600.1	Glyma.10G221600	PF01918	PF04182	PF00271	0.0375262	0.0446395	0.0924846
glyma.Wm82.gnm2.ann1.Glyma.10G226700.1	Glyma.10G226700	PF00903	PF04059	PF00076	0.00431631	0.0286871	0.956039
glyma.Wm82.gnm2.ann1.Glyma.10G226700.2	Glyma.10G226700	PF00903	PF04059	PF00076	0.00463234	0.0239203	0.958038
glyma.Wm82.gnm2.ann1.Glyma.10G226700.5	Glyma.10G226700	PF00903	PF04059	PF00076	0.00370583	0.0433273	0.945352
glyma.Wm82.gnm2.ann1.Glyma.10G226700.6	Glyma.10G226700	PF00903	PF04059	PF00076	0.00257872	0.0499879	0.943021
glyma.Wm82.gnm2.ann1.Glyma.10G226700.7	Glyma.10G226700	PF00903	PF04059	PF00076	0.00372222	0.0190988	0.965503
glyma.Wm82.gnm2.ann1.Glyma.10G226700.3	Glyma.10G226700	PF00903	PF04059	PF00076	0.00372222	0.0190988	0.965503
glyma.Wm82.gnm2.ann1.Glyma.10G226700.4	Glyma.10G226700	PF05687	PF08784	PF05678	0.0447255	0.0460343	0.22927
glyma.Wm82.gnm2.ann1.Glyma.10G123600.1	Glyma.10G123600	PF00171	PF05603	PF13881	0.046802	0.0503357	0.0749814
glyma.Wm82.gnm2.ann1.Glyma.10G123600.2	Glyma.10G123600	PF06974	PF00171	PF13881	0.0353553	0.0364858	0.0646641
glyma.Wm82.gnm2.ann1.Glyma.10G034300.1	Glyma.10G034300	PF14215	PF00170	PF00010	0.00170948	0.0051035	0.987538
glyma.Wm82.gnm2.ann1.Glyma.10G200100.1	Glyma.10G200100	PF04928	PF00102	PF00782	0.00218831	0.0179109	0.971706
glyma.Wm82.gnm2.ann1.Glyma.10G022800.2	Glyma.10G022800	PF14226	PF00646	PF00252	0.0197816	0.0388701	0.360223
glyma.Wm82.gnm2.ann1.Glyma.10G022800.3	Glyma.10G022800	PF14226	PF00646	PF00252	0.0197816	0.0388701	0.360223
glyma.Wm82.gnm2.ann1.Glyma.10G022800.1	Glyma.10G022800	PF14226	PF00646	PF00252	0.0197816	0.0388701	0.360223
glyma.Wm82.gnm2.ann1.Glyma.10G088600.1	Glyma.10G088600	PF00010	PF07716	PF00319	3.6114e-05	6.59768e-05	0.99984
glyma.Wm82.gnm2.ann1.Glyma.10G054300.1	Glyma.10G054300	PF00441	PF17177	PF14432	0.0447866	0.0484531	0.451423
glyma.Wm82.gnm2.ann1.Glyma.10G001900.1	Glyma.10G001900	PF12348	PF02854	PF12031	0.0399811	0.0594631	0.763463
glyma.Wm82.gnm2.ann1.Glyma.10G001900.2	Glyma.10G001900	PF12348	PF02854	PF12031	0.0502074	0.0971525	0.709101
glyma.Wm82.gnm2.ann1.Glyma.10G021600.1	Glyma.10G021600	PF09177	PF08172	PF00307	0.0912868	0.162497	0.209921
glyma.Wm82.gnm2.ann1.Glyma.10G021600.3	Glyma.10G021600	PF03469	PF09177	PF00307	0.0602853	0.123434	0.340524
glyma.Wm82.gnm2.ann1.Glyma.10G021600.2	Glyma.10G021600	PF12325	PF08172	PF00307	0.136913	0.146432	0.174369
glyma.Wm82.gnm2.ann1.Glyma.10G043600.1	Glyma.10G043600	PF00188	PF12656	PF06003	0.0426476	0.0759184	0.389399
glyma.Wm82.gnm2.ann1.Glyma.10G043600.2	Glyma.10G043600	PF00188	PF12656	PF06003	0.0426476	0.0759184	0.389399
glyma.Wm82.gnm2.ann1.Glyma.10G189100.1	Glyma.10G189100	PF00999	PF00955	PF01699	0.158596	0.219551	0.237174
glyma.Wm82.gnm2.ann1.Glyma.10G075600.1	Glyma.10G075600	PF04893	PF01699	PF13962	0.103521	0.186485	0.270659
glyma.Wm82.gnm2.ann1.Glyma.10G011800.1	Glyma.10G011800	PF12862	PF17874	PF17177	0.18554	0.222012	0.226262
glyma.Wm82.gnm2.ann1.Glyma.10G122800.1	Glyma.10G122800	PF00160	PF00955	PF00135	0.03065	0.0337189	0.0340079
glyma.Wm82.gnm2.ann1.Glyma.10G228700.1	Glyma.10G228700	PF07707	PF08662	PF00651	0.153143	0.249367	0.303769
glyma.Wm82.gnm2.ann1.Glyma.10G228700.2	Glyma.10G228700	PF08662	PF07707	PF00651	0.14332	0.25062	0.277063
glyma.Wm82.gnm2.ann1.Glyma.10G042500.1	Glyma.10G042500	PF03629	PF13472	PF00657	5.2165e-05	0.124755	0.875008
glyma.Wm82.gnm2.ann1.Glyma.10G198200.1	Glyma.10G198200	PF13441	PF13962	PF01471	0.0336957	0.0343973	0.109779
glyma.Wm82.gnm2.ann1.Glyma.10G264500.1	Glyma.10G264500	PF13328	PF14432	PF17177	0.000342362	0.00220783	0.995514
glyma.Wm82.gnm2.ann1.Glyma.10G020100.1	Glyma.10G020100	PF03847	PF15511	PF00808	0.00603558	0.0106257	0.965597
glyma.Wm82.gnm2.ann1.Glyma.10G208900.1	Glyma.10G208900	PF00916	PF00361	PF00160	0.0439324	0.0463607	0.0794426
glyma.Wm82.gnm2.ann1.Glyma.10G214500.1	Glyma.10G214500	PF00635	PF02617	PF00403	0.0400676	0.0593733	0.0614361
glyma.Wm82.gnm2.ann1.Glyma.10G277400.1	Glyma.10G277400	PF13919	PF10382	PF09133	0.0649097	0.0805931	0.106935
glyma.Wm82.gnm2.ann1.Glyma.10G051100.1	Glyma.10G051100	PF13180	PF00498	PF11976	0.00716564	0.206393	0.773607
glyma.Wm82.gnm2.ann1.Glyma.10G285200.1	Glyma.10G285200	PF01464	PF17874	PF17177	0.0164694	0.0308756	0.804032
glyma.Wm82.gnm2.ann1.Glyma.10G212900.1	Glyma.10G212900	PF00056	PF02492	PF03143	1.6159e-05	1.70738e-05	0.999793
glyma.Wm82.gnm2.ann1.Glyma.10G296300.1	Glyma.10G296300	PF00615	PF00169	PF03732	0.0582164	0.136245	0.140483
glyma.Wm82.gnm2.ann1.Glyma.10G275200.1	Glyma.10G275200	PF00888	PF00244	PF08718	0.00299658	0.00340597	0.976796
glyma.Wm82.gnm2.ann1.Glyma.10G270200.1	Glyma.10G270200	PF07145	PF02338	PF00564	0.00159483	0.00165177	0.988921
glyma.Wm82.gnm2.ann1.Glyma.10G160600.1	Glyma.10G160600	PF03031	PF04755	PF03364	0.0472257	0.0888307	0.139783
glyma.Wm82.gnm2.ann1.Glyma.10G031900.1	Glyma.10G031900	PF02902	PF00042	PF03732	0.0630581	0.0641689	0.0728421
glyma.Wm82.gnm2.ann1.Glyma.10G031900.2	Glyma.10G031900	PF11976	PF00076	PF05678	0.0878043	0.115306	0.282351
glyma.Wm82.gnm2.ann1.Glyma.10G292700.1	Glyma.10G292700	PF16575	PF01926	PF02263	0.135736	0.279643	0.407656
glyma.Wm82.gnm2.ann1.Glyma.10G292700.2	Glyma.10G292700	PF16575	PF01926	PF02263	0.138413	0.233166	0.466525
glyma.Wm82.gnm2.ann1.Glyma.10G292700.3	Glyma.10G292700	PF02263	PF01926	PF16575	0.158896	0.184534	0.559958
glyma.Wm82.gnm2.ann1.Glyma.10G132800.1	Glyma.10G132800	PF01753	PF00931	PF17874	0.0534111	0.0656648	0.250936
glyma.Wm82.gnm2.ann1.Glyma.10G147700.1	Glyma.10G147700	PF01936	PF01872	PF00582	1.24241e-06	2.88147e-06	0.999986
glyma.Wm82.gnm2.ann1.Glyma.10G096200.1	Glyma.10G096200	PF03167	PF05199	PF00069	0.067111	0.0976782	0.158346
glyma.Wm82.gnm2.ann1.Glyma.10G006500.1	Glyma.10G006500	PF01370	PF07993	PF04321	0.127913	0.267532	0.432281
glyma.Wm82.gnm2.ann1.Glyma.10G006500.2	Glyma.10G006500	PF00082	PF00171	PF00857	0.0777861	0.0799758	0.207294
glyma.Wm82.gnm2.ann1.Glyma.10G281300.1	Glyma.10G281300	PF14111	PF05641	PF02362	0.000561583	0.00080693	0.995342
glyma.Wm82.gnm2.ann1.Glyma.10G001700.1	Glyma.10G001700	PF00249	PF07714	PF00069	2.56488e-05	0.0126517	0.987228
glyma.Wm82.gnm2.ann1.Glyma.10G010100.1	Glyma.10G010100	PF07741	PF06886	PF10187	0.0702111	0.0901426	0.337432
glyma.Wm82.gnm2.ann1.Glyma.10G011200.1	Glyma.10G011200	PF00026	PF13456	PF00307	0.024389	0.0379802	0.0597772
glyma.Wm82.gnm2.ann1.Glyma.10G075100.1	Glyma.10G075100	PF07885	PF00361	PF00076	0.0340387	0.0595346	0.0904681
glyma.Wm82.gnm2.ann1.Glyma.10G052600.1	Glyma.10G052600	PF00089	PF07714	PF00069	4.48796e-05	0.0274692	0.972434
glyma.Wm82.gnm2.ann1.Glyma.10G293300.1	Glyma.10G293300	PF00134	PF13456	PF05699	0.0371686	0.0417317	0.374784
glyma.Wm82.gnm2.ann1.Glyma.10G110400.1	Glyma.10G110400	PF02037	PF00011	PF00254	0.0910165	0.168374	0.175445
glyma.Wm82.gnm2.ann1.Glyma.10G254200.1	Glyma.10G254200	PF07727	PF07714	PF00069	0.00111399	0.22067	0.775271
glyma.Wm82.gnm2.ann1.Glyma.10G157700.1	Glyma.10G157700	PF00168	PF12894	PF08596	0.0227508	0.0359371	0.661386
glyma.Wm82.gnm2.ann1.Glyma.10G045200.1	Glyma.10G045200	PF13976	PF01844	PF04997	0.149072	0.185508	0.313021
glyma.Wm82.gnm2.ann1.Glyma.10G254400.1	Glyma.10G254400	PF00564	PF11976	PF17035	0.102781	0.133763	0.16294
glyma.Wm82.gnm2.ann1.Glyma.10G254400.2	Glyma.10G254400	PF00564	PF11976	PF00808	0.0661902	0.110364	0.127662
glyma.Wm82.gnm2.ann1.Glyma.10G109200.1	Glyma.10G109200	PF00089	PF07714	PF00069	5.77073e-05	0.0315113	0.968399
glyma.Wm82.gnm2.ann1.Glyma.10G109200.2	Glyma.10G109200	PF00089	PF07714	PF00069	3.70393e-06	0.0127929	0.987197
glyma.Wm82.gnm2.ann1.Glyma.10G109200.3	Glyma.10G109200	PF00089	PF07714	PF00069	2.97957e-05	0.0563297	0.943575
glyma.Wm82.gnm2.ann1.Glyma.10G109200.4	Glyma.10G109200	PF00454	PF07714	PF00069	2.63881e-05	0.0234653	0.976443
glyma.Wm82.gnm2.ann1.Glyma.10G109200.5	Glyma.10G109200	PF00089	PF07714	PF00069	1.78639e-06	0.0223839	0.977611
glyma.Wm82.gnm2.ann1.Glyma.10G202000.1	Glyma.10G202000	PF00557	PF01648	PF02338	0.0204837	0.0220199	0.886794
glyma.Wm82.gnm2.ann1.Glyma.10G198400.1	Glyma.10G198400	PF00361	PF00134	PF00646	0.0384005	0.044789	0.0535105
glyma.Wm82.gnm2.ann1.Glyma.10G023400.1	Glyma.10G023400	PF00089	PF07714	PF00069	4.58739e-06	0.021118	0.97887
glyma.Wm82.gnm2.ann1.Glyma.10G077600.1	Glyma.10G077600	PF00254	PF00856	PF00407	0.0944869	0.134041	0.208391
glyma.Wm82.gnm2.ann1.Glyma.10G077600.2	Glyma.10G077600	PF00254	PF00091	PF00622	0.0532005	0.0688985	0.21717
glyma.Wm82.gnm2.ann1.Glyma.10G087500.1	Glyma.10G087500	PF00326	PF07859	PF00135	0.0590664	0.301531	0.634777
glyma.Wm82.gnm2.ann1.Glyma.10G150900.1	Glyma.10G150900	PF00059	PF00024	PF03024	0.0154291	0.0159468	0.924433
glyma.Wm82.gnm2.ann1.Glyma.10G150900.3	Glyma.10G150900	PF00024	PF00059	PF03024	0.0450967	0.0777898	0.720942
glyma.Wm82.gnm2.ann1.Glyma.10G150900.2	Glyma.10G150900	PF00024	PF00059	PF03024	0.00873287	0.0239138	0.944771
glyma.Wm82.gnm2.ann1.Glyma.10G118800.1	Glyma.10G118800	PF00564	PF00856	PF00646	0.0546252	0.0624079	0.0771027
glyma.Wm82.gnm2.ann1.Glyma.10G118800.2	Glyma.10G118800	PF00856	PF00646	PF00443	0.0726253	0.0733027	0.0745254
glyma.Wm82.gnm2.ann1.Glyma.10G118800.3	Glyma.10G118800	PF00564	PF02362	PF00646	0.0614578	0.0709389	0.124844
glyma.Wm82.gnm2.ann1.Glyma.10G118800.4	Glyma.10G118800	PF00651	PF00646	PF00856	0.0497768	0.0779053	0.115643
glyma.Wm82.gnm2.ann1.Glyma.10G118800.5	Glyma.10G118800	PF00856	PF00646	PF08646	0.0440754	0.0606566	0.0676221
glyma.Wm82.gnm2.ann1.Glyma.10G118800.6	Glyma.10G118800	PF05699	PF00856	PF00646	0.041655	0.0432021	0.118237
glyma.Wm82.gnm2.ann1.Glyma.10G118800.7	Glyma.10G118800	PF00646	PF00615	PF05699	0.0909437	0.102418	0.169484
glyma.Wm82.gnm2.ann1.Glyma.10G118800.8	Glyma.10G118800	PF00168	PF00646	PF05699	0.0618159	0.118397	0.165717
glyma.Wm82.gnm2.ann1.Glyma.10G118800.9	Glyma.10G118800	PF05699	PF00646	PF02362	0.0523808	0.13057	0.135839
glyma.Wm82.gnm2.ann1.Glyma.10G192700.1	Glyma.10G192700	PF00454	PF07714	PF00069	0.000646607	0.0440607	0.953173
glyma.Wm82.gnm2.ann1.Glyma.10G192700.2	Glyma.10G192700	PF01636	PF07714	PF00069	0.00054124	0.0451013	0.951915
glyma.Wm82.gnm2.ann1.Glyma.10G040900.1	Glyma.10G040900	PF13640	PF01432	PF00443	0.0495845	0.117195	0.17416
glyma.Wm82.gnm2.ann1.Glyma.10G091100.1	Glyma.10G091100	PF00903	PF14111	PF01074	0.0450653	0.0524191	0.080876
glyma.Wm82.gnm2.ann1.Glyma.10G233600.1	Glyma.10G233600	PF08172	PF09177	PF10496	0.0657313	0.0771846	0.159604
glyma.Wm82.gnm2.ann1.Glyma.10G139000.1	Glyma.10G139000	PF10545	PF12776	PF00249	0.00258209	0.00283196	0.993664
glyma.Wm82.gnm2.ann1.Glyma.10G114900.1	Glyma.10G114900	PF13639	PF00097	PF08646	0.0893472	0.139496	0.153677
glyma.Wm82.gnm2.ann1.Glyma.10G234700.1	Glyma.10G234700	PF13091	PF03372	PF01553	0.0377518	0.185208	0.219346
glyma.Wm82.gnm2.ann1.Glyma.10G053900.1	Glyma.10G053900	PF01590	PF07885	PF00027	3.2747e-05	0.000514584	0.99938
glyma.Wm82.gnm2.ann1.Glyma.10G053900.2	Glyma.10G053900	PF13426	PF07885	PF00027	0.000154576	0.00210922	0.997391
glyma.Wm82.gnm2.ann1.Glyma.10G053900.4	Glyma.10G053900	PF13426	PF07885	PF00027	0.000154576	0.00210922	0.997391
glyma.Wm82.gnm2.ann1.Glyma.10G053900.5	Glyma.10G053900	PF01590	PF07885	PF00027	8.56193e-05	0.001551	0.99812
glyma.Wm82.gnm2.ann1.Glyma.10G053900.6	Glyma.10G053900	PF13426	PF07885	PF00027	0.000149841	0.00718217	0.991933
glyma.Wm82.gnm2.ann1.Glyma.10G053900.3	Glyma.10G053900	PF01590	PF07885	PF00027	5.09727e-05	0.00162872	0.998129
glyma.Wm82.gnm2.ann1.Glyma.10G055100.2	Glyma.10G055100	PF12612	PF08389	PF10350	0.131254	0.162795	0.341589
glyma.Wm82.gnm2.ann1.Glyma.10G083800.1	Glyma.10G083800	PF06391	PF00210	PF07743	0.000169602	0.000629219	0.998524
glyma.Wm82.gnm2.ann1.Glyma.10G137900.1	Glyma.10G137900	PF04003	PF08585	PF01248	0.0964145	0.169101	0.229553
glyma.Wm82.gnm2.ann1.Glyma.10G004700.1	Glyma.10G004700	PF00059	PF12894	PF08662	0.0847683	0.126416	0.226311
glyma.Wm82.gnm2.ann1.Glyma.10G250400.2	Glyma.10G250400	PF01399	PF00571	PF13943	0.00262553	0.0032291	0.981445
glyma.Wm82.gnm2.ann1.Glyma.10G250400.1	Glyma.10G250400	PF01399	PF00571	PF13943	0.00262553	0.0032291	0.981445
glyma.Wm82.gnm2.ann1.Glyma.10G250400.3	Glyma.10G250400	PF01399	PF00571	PF13943	0.00262553	0.0032291	0.981445
glyma.Wm82.gnm2.ann1.Glyma.10G055800.1	Glyma.10G055800	PF13193	PF00717	PF04266	0.0474947	0.0557979	0.0802396
glyma.Wm82.gnm2.ann1.Glyma.10G271500.3	Glyma.10G271500	PF00626	PF07228	PF00481	6.63245e-05	0.0192117	0.9807
glyma.Wm82.gnm2.ann1.Glyma.10G271500.2	Glyma.10G271500	PF00626	PF07228	PF00481	6.63245e-05	0.0192117	0.9807
glyma.Wm82.gnm2.ann1.Glyma.10G271500.1	Glyma.10G271500	PF00626	PF07228	PF00481	6.63246e-05	0.0192116	0.980701
glyma.Wm82.gnm2.ann1.Glyma.10G271500.4	Glyma.10G271500	PF00626	PF07228	PF00481	6.63246e-05	0.0192116	0.980701
glyma.Wm82.gnm2.ann1.Glyma.10G271500.5	Glyma.10G271500	PF00626	PF07228	PF00481	6.63246e-05	0.0192116	0.980701
glyma.Wm82.gnm2.ann1.Glyma.10G286200.1	Glyma.10G286200	PF00478	PF01645	PF01180	0.0121254	0.021549	0.962423
glyma.Wm82.gnm2.ann1.Glyma.10G272600.1	Glyma.10G272600	PF07786	PF00892	PF04893	0.145276	0.20715	0.250412
glyma.Wm82.gnm2.ann1.Glyma.10G220100.1	Glyma.10G220100	PF02223	PF06414	PF00004	0.172405	0.250062	0.279477
glyma.Wm82.gnm2.ann1.Glyma.10G220100.2	Glyma.10G220100	PF00150	PF00704	PF00903	0.0429796	0.0808585	0.137833
glyma.Wm82.gnm2.ann1.Glyma.10G236000.1	Glyma.10G236000	PF07808	PF15477	PF12656	0.0356034	0.0445754	0.626533
glyma.Wm82.gnm2.ann1.Glyma.10G236000.2	Glyma.10G236000	PF15477	PF02037	PF12656	0.0415635	0.0458233	0.580689
glyma.Wm82.gnm2.ann1.Glyma.10G236000.3	Glyma.10G236000	PF13266	PF15477	PF12656	0.034392	0.0439913	0.692257
glyma.Wm82.gnm2.ann1.Glyma.10G236000.4	Glyma.10G236000	PF13266	PF15477	PF12656	0.0339483	0.0422435	0.669713
glyma.Wm82.gnm2.ann1.Glyma.10G290100.1	Glyma.10G290100	PF00035	PF00327	PF02195	0.0492571	0.09944	0.108721
glyma.Wm82.gnm2.ann1.Glyma.10G277500.1	Glyma.10G277500	PF15477	PF07839	PF03941	0.0196239	0.0244113	0.657747
glyma.Wm82.gnm2.ann1.Glyma.10G110300.1	Glyma.10G110300	PF00505	PF05678	PF10172	0.0620522	0.181088	0.290013
glyma.Wm82.gnm2.ann1.Glyma.10G260800.1	Glyma.10G260800	PF03364	PF13302	PF08212	0.0604151	0.0606032	0.131806
glyma.Wm82.gnm2.ann1.Glyma.10G069000.1	Glyma.10G069000	PF13966	PF06839	PF06943	0.124156	0.170896	0.202692
glyma.Wm82.gnm2.ann1.Glyma.10G102500.1	Glyma.10G102500	PF00931	PF00171	PF03936	0.0488393	0.0527991	0.121017
glyma.Wm82.gnm2.ann1.Glyma.10G199300.1	Glyma.10G199300	PF12796	PF07064	PF00651	0.0728157	0.0877787	0.324772
glyma.Wm82.gnm2.ann1.Glyma.10G029100.1	Glyma.10G029100	PF00536	PF01466	PF00646	0.0745379	0.0765674	0.452941
glyma.Wm82.gnm2.ann1.Glyma.10G112700.1	Glyma.10G112700	PF05362	PF08423	PF00004	0.0744519	0.0821054	0.0912289
glyma.Wm82.gnm2.ann1.Glyma.10G266900.1	Glyma.10G266900	PF09405	PF08648	PF15477	0.0974483	0.182481	0.475968
glyma.Wm82.gnm2.ann1.Glyma.10G266900.2	Glyma.10G266900	PF09405	PF08648	PF15477	0.0974483	0.182481	0.475968
glyma.Wm82.gnm2.ann1.Glyma.10G044800.1	Glyma.10G044800	PF08627	PF03151	PF00892	0.175627	0.210584	0.499745
glyma.Wm82.gnm2.ann1.Glyma.10G215700.1	Glyma.10G215700	PF08241	PF00891	PF08100	4.90278e-05	0.0935743	0.906297
glyma.Wm82.gnm2.ann1.Glyma.10G233100.1	Glyma.10G233100	PF00288	PF00591	PF00814	0.0743687	0.087673	0.162144
glyma.Wm82.gnm2.ann1.Glyma.10G233100.2	Glyma.10G233100	PF03446	PF00814	PF00248	0.0551574	0.0595697	0.167004
glyma.Wm82.gnm2.ann1.Glyma.10G086900.1	Glyma.10G086900	PF00234	PF05617	PF02140	0.0558374	0.060449	0.0826493
glyma.Wm82.gnm2.ann1.Glyma.10G268400.1	Glyma.10G268400	PF13409	PF00042	PF17172	0.146965	0.159991	0.163274
glyma.Wm82.gnm2.ann1.Glyma.10G179600.1	Glyma.10G179600	PF00125	PF07714	PF00069	2.33665e-05	0.00721007	0.992717
glyma.Wm82.gnm2.ann1.Glyma.10G170200.1	Glyma.10G170200	PF00550	PF01336	PF00582	0.0591033	0.0684722	0.0734182
glyma.Wm82.gnm2.ann1.Glyma.10G164300.1	Glyma.10G164300	PF13328	PF00133	PF03070	0.00679674	0.0119354	0.942707
glyma.Wm82.gnm2.ann1.Glyma.10G164300.2	Glyma.10G164300	PF01029	PF00501	PF03070	0.0996108	0.138087	0.52082
glyma.Wm82.gnm2.ann1.Glyma.10G164300.3	Glyma.10G164300	PF00501	PF01259	PF03070	0.0290327	0.0345627	0.846692
glyma.Wm82.gnm2.ann1.Glyma.10G291300.1	Glyma.10G291300	PF00567	PF08596	PF03178	0.0137735	0.0198421	0.862554
glyma.Wm82.gnm2.ann1.Glyma.10G134500.2	Glyma.10G134500	PF01088	PF00168	PF00089	0.0387004	0.0413642	0.0549953
glyma.Wm82.gnm2.ann1.Glyma.10G134500.1	Glyma.10G134500	PF01088	PF00168	PF00089	0.0387004	0.0413642	0.0549953
glyma.Wm82.gnm2.ann1.Glyma.10G002500.1	Glyma.10G002500	PF15511	PF00125	PF00010	0.11452	0.258692	0.304594
glyma.Wm82.gnm2.ann1.Glyma.10G002500.2	Glyma.10G002500	PF15511	PF00125	PF00010	0.11452	0.258692	0.304594
glyma.Wm82.gnm2.ann1.Glyma.10G225600.1	Glyma.10G225600	PF12076	PF13456	PF14111	0.0501577	0.13685	0.175857
glyma.Wm82.gnm2.ann1.Glyma.10G120800.1	Glyma.10G120800	PF05678	PF00069	PF07714	0.0212831	0.0258893	0.0291362
glyma.Wm82.gnm2.ann1.Glyma.10G157600.1	Glyma.10G157600	PF00011	PF14364	PF11976	0.12383	0.127977	0.213933
glyma.Wm82.gnm2.ann1.Glyma.10G038500.1	Glyma.10G038500	PF00728	PF03104	PF01612	0.0257589	0.0306707	0.0373787
glyma.Wm82.gnm2.ann1.Glyma.10G021100.1	Glyma.10G021100	PF01323	PF00085	PF00462	0.00179292	0.0228633	0.964034
glyma.Wm82.gnm2.ann1.Glyma.10G133700.1	Glyma.10G133700	PF00089	PF12894	PF08662	0.0497675	0.206778	0.372943
glyma.Wm82.gnm2.ann1.Glyma.10G052100.1	Glyma.10G052100	PF13947	PF02140	PF05617	0.0357184	0.0358313	0.036176
glyma.Wm82.gnm2.ann1.Glyma.10G147500.1	Glyma.10G147500	PF00909	PF16916	PF00916	0.0887269	0.112861	0.115548
glyma.Wm82.gnm2.ann1.Glyma.10G169800.1	Glyma.10G169800	PF01833	PF01915	PF00082	0.000560281	0.00115443	0.994192
glyma.Wm82.gnm2.ann1.Glyma.10G013600.1	Glyma.10G013600	PF14634	PF13639	PF00097	0.161355	0.162279	0.453599
glyma.Wm82.gnm2.ann1.Glyma.10G008500.1	Glyma.10G008500	PF00955	PF00270	PF00857	0.0496129	0.0627971	0.0866784
glyma.Wm82.gnm2.ann1.Glyma.10G122100.1	Glyma.10G122100	PF11835	PF03108	PF00076	0.0242449	0.0298014	0.892492
glyma.Wm82.gnm2.ann1.Glyma.10G150700.1	Glyma.10G150700	PF00188	PF01095	PF04043	0.000240758	0.000366973	0.998308
glyma.Wm82.gnm2.ann1.Glyma.10G239000.1	Glyma.10G239000	PF00916	PF13906	PF00361	0.11069	0.114351	0.270224
glyma.Wm82.gnm2.ann1.Glyma.10G165500.1	Glyma.10G165500	PF08573	PF02338	PF00856	0.000965197	0.00293722	0.98834
glyma.Wm82.gnm2.ann1.Glyma.10G297400.1	Glyma.10G297400	PF07884	PF04536	PF02225	0.00181105	0.00597313	0.988759
glyma.Wm82.gnm2.ann1.Glyma.10G056300.1	Glyma.10G056300	PF00271	PF00085	PF00578	0.0465048	0.0956924	0.0980008
glyma.Wm82.gnm2.ann1.Glyma.10G085100.1	Glyma.10G085100	PF04419	PF07716	PF00319	2.76099e-05	3.62144e-05	0.999887
glyma.Wm82.gnm2.ann1.Glyma.10G180700.1	Glyma.10G180700	PF00651	PF05699	PF03364	0.0732904	0.0930773	0.265513
glyma.Wm82.gnm2.ann1.Glyma.10G180700.2	Glyma.10G180700	PF06839	PF00031	PF00169	0.0348489	0.0695616	0.339061
glyma.Wm82.gnm2.ann1.Glyma.10G007700.2	Glyma.10G007700	PF13532	PF14226	PF03171	0.00011539	0.00125824	0.998561
glyma.Wm82.gnm2.ann1.Glyma.10G007700.1	Glyma.10G007700	PF13532	PF14226	PF03171	0.00011539	0.00125824	0.998561
glyma.Wm82.gnm2.ann1.Glyma.10G167500.1	Glyma.10G167500	PF00156	PF15985	PF10447	0.000273649	0.000471148	0.997036
glyma.Wm82.gnm2.ann1.Glyma.10G138800.1	Glyma.10G138800	PF00170	PF13891	PF00010	0.000300476	0.000730576	0.998645
glyma.Wm82.gnm2.ann1.Glyma.10G138800.2	Glyma.10G138800	PF00170	PF13891	PF00010	0.000300476	0.000730577	0.998645
glyma.Wm82.gnm2.ann1.Glyma.10G138800.3	Glyma.10G138800	PF00170	PF13891	PF00010	0.000353069	0.000554229	0.998608
glyma.Wm82.gnm2.ann1.Glyma.10G019400.1	Glyma.10G019400	PF17855	PF07728	PF00004	0.0137688	0.0371175	0.835808
glyma.Wm82.gnm2.ann1.Glyma.10G133900.1	Glyma.10G133900	PF00024	PF13947	PF14380	0.0507427	0.31504	0.457431
glyma.Wm82.gnm2.ann1.Glyma.10G133900.2	Glyma.10G133900	PF00024	PF13947	PF14380	0.0496722	0.318754	0.462264
glyma.Wm82.gnm2.ann1.Glyma.10G017900.1	Glyma.10G017900	PF04784	PF00076	PF00035	0.0187045	0.0452445	0.591221
glyma.Wm82.gnm2.ann1.Glyma.10G017900.2	Glyma.10G017900	PF02338	PF00085	PF01398	0.0528497	0.130314	0.153281
glyma.Wm82.gnm2.ann1.Glyma.10G072500.1	Glyma.10G072500	PF12776	PF14111	PF00646	0.0777092	0.0821504	0.128618
glyma.Wm82.gnm2.ann1.Glyma.10G072500.2	Glyma.10G072500	PF00646	PF13456	PF00307	0.0576447	0.0676997	0.0802027
glyma.Wm82.gnm2.ann1.Glyma.10G261500.1	Glyma.10G261500	PF02223	PF00109	PF00171	0.0303208	0.0698041	0.119098
glyma.Wm82.gnm2.ann1.Glyma.10G245200.1	Glyma.10G245200	PF02201	PF02270	PF02926	0.0682798	0.0707208	0.18045
glyma.Wm82.gnm2.ann1.Glyma.10G245200.2	Glyma.10G245200	PF02270	PF02926	PF10545	0.0435641	0.053246	0.118623
glyma.Wm82.gnm2.ann1.Glyma.10G002400.1	Glyma.10G002400	PF00271	PF00171	PF01248	0.000192502	0.000484447	0.998649
glyma.Wm82.gnm2.ann1.Glyma.10G186800.1	Glyma.10G186800	PF13867	PF00615	PF03732	0.0554215	0.171384	0.226944
glyma.Wm82.gnm2.ann1.Glyma.10G033800.1	Glyma.10G033800	PF01423	PF01553	PF03159	0.0299975	0.0366053	0.0392758
glyma.Wm82.gnm2.ann1.Glyma.10G149800.1	Glyma.10G149800	PF00505	PF12656	PF04419	0.104508	0.128578	0.343446
glyma.Wm82.gnm2.ann1.Glyma.10G028200.1	Glyma.10G028200	PF04043	PF14368	PF00234	0.0896433	0.210869	0.531504
glyma.Wm82.gnm2.ann1.Glyma.10G028200.2	Glyma.10G028200	PF14547	PF14368	PF00234	0.0928311	0.22005	0.602576
glyma.Wm82.gnm2.ann1.Glyma.10G224800.1	Glyma.10G224800	PF10536	PF05699	PF13456	0.0386004	0.0502277	0.176063
glyma.Wm82.gnm2.ann1.Glyma.10G251700.1	Glyma.10G251700	PF00754	PF00251	PF00059	0.069993	0.132294	0.560011
glyma.Wm82.gnm2.ann1.Glyma.10G061100.1	Glyma.10G061100	PF00182	PF13947	PF00188	0.117498	0.14654	0.296429
glyma.Wm82.gnm2.ann1.Glyma.10G036500.1	Glyma.10G036500	PF07727	PF05699	PF14244	0.0296956	0.0423004	0.0432695
glyma.Wm82.gnm2.ann1.Glyma.10G010900.1	Glyma.10G010900	PF16095	PF07717	PF00271	0.0679091	0.12105	0.527022
glyma.Wm82.gnm2.ann1.Glyma.10G283200.2	Glyma.10G283200	PF00271	PF07728	PF00006	0.000143173	0.000146556	0.998365
glyma.Wm82.gnm2.ann1.Glyma.10G283200.3	Glyma.10G283200	PF00271	PF07728	PF00006	0.000143173	0.000146556	0.998365
glyma.Wm82.gnm2.ann1.Glyma.10G283200.1	Glyma.10G283200	PF00271	PF07728	PF00006	0.000143173	0.000146556	0.998365
glyma.Wm82.gnm2.ann1.Glyma.10G060100.1	Glyma.10G060100	PF00497	PF01743	PF05193	0.110917	0.169821	0.210382
glyma.Wm82.gnm2.ann1.Glyma.10G060100.3	Glyma.10G060100	PF00497	PF01743	PF05193	0.110917	0.169821	0.210382
glyma.Wm82.gnm2.ann1.Glyma.10G060100.2	Glyma.10G060100	PF05116	PF04909	PF01717	0.0838559	0.192962	0.280975
glyma.Wm82.gnm2.ann1.Glyma.10G068400.1	Glyma.10G068400	PF04851	PF01656	PF02374	0.0260882	0.267564	0.560005
glyma.Wm82.gnm2.ann1.Glyma.10G252000.1	Glyma.10G252000	PF05770	PF10469	PF11976	0.094517	0.12743	0.511928
glyma.Wm82.gnm2.ann1.Glyma.10G068800.1	Glyma.10G068800	PF01578	PF00487	PF00361	0.0950423	0.137163	0.226278
glyma.Wm82.gnm2.ann1.Glyma.10G253900.1	Glyma.10G253900	PF00089	PF07714	PF00069	2.00264e-05	0.020834	0.979137
glyma.Wm82.gnm2.ann1.Glyma.10G007000.1	Glyma.10G007000	PF07727	PF13302	PF03061	0.0396455	0.0402077	0.0463286
glyma.Wm82.gnm2.ann1.Glyma.10G266800.1	Glyma.10G266800	PF00024	PF00031	PF00059	0.025532	0.0590998	0.287051
glyma.Wm82.gnm2.ann1.Glyma.10G239100.1	Glyma.10G239100	PF04059	PF03467	PF00076	0.000682632	0.00363244	0.994803
glyma.Wm82.gnm2.ann1.Glyma.10G239100.2	Glyma.10G239100	PF04059	PF03467	PF00076	0.000830938	0.00213354	0.996227
glyma.Wm82.gnm2.ann1.Glyma.10G239100.3	Glyma.10G239100	PF04059	PF03467	PF00076	0.000830938	0.00213354	0.996227
glyma.Wm82.gnm2.ann1.Glyma.10G072400.1	Glyma.10G072400	PF11976	PF00347	PF13881	0.126672	0.165165	0.247413
glyma.Wm82.gnm2.ann1.Glyma.10G244900.1	Glyma.10G244900	PF14634	PF00097	PF13639	0.0373094	0.307729	0.579093
glyma.Wm82.gnm2.ann1.Glyma.10G230900.1	Glyma.10G230900	PF00754	PF01095	PF12708	0.0829574	0.0926575	0.582554
glyma.Wm82.gnm2.ann1.Glyma.10G148800.1	Glyma.10G148800	PF12333	PF00004	PF12796	0.073403	0.0963972	0.130284
glyma.Wm82.gnm2.ann1.Glyma.10G040700.1	Glyma.10G040700	PF05686	PF07137	PF03016	0.00931223	0.010724	0.972515
glyma.Wm82.gnm2.ann1.Glyma.10G293700.1	Glyma.10G293700	PF00249	PF10545	PF12776	0.00633962	0.0281724	0.962976
glyma.Wm82.gnm2.ann1.Glyma.10G238800.1	Glyma.10G238800	PF03446	PF02800	PF01113	0.001176	0.00216567	0.993244
glyma.Wm82.gnm2.ann1.Glyma.10G238800.2	Glyma.10G238800	PF03446	PF02800	PF01113	0.00189645	0.00448062	0.989154
glyma.Wm82.gnm2.ann1.Glyma.10G238800.4	Glyma.10G238800	PF03807	PF00107	PF01113	0.0731501	0.075529	0.632877
glyma.Wm82.gnm2.ann1.Glyma.10G238800.3	Glyma.10G238800	PF00198	PF01113	PF00501	0.0951837	0.162409	0.196373
glyma.Wm82.gnm2.ann1.Glyma.10G238800.5	Glyma.10G238800	PF00171	PF00501	PF13840	0.0363	0.0664289	0.403803
glyma.Wm82.gnm2.ann1.Glyma.10G102600.1	Glyma.10G102600	PF02362	PF00903	PF00076	0.00935564	0.0104055	0.933501
glyma.Wm82.gnm2.ann1.Glyma.10G098800.1	Glyma.10G098800	PF00035	PF00505	PF00046	0.0334503	0.0373643	0.0478972
glyma.Wm82.gnm2.ann1.Glyma.10G183400.1	Glyma.10G183400	PF01485	PF04828	PF01844	0.0762393	0.117794	0.193896
glyma.Wm82.gnm2.ann1.Glyma.10G083500.1	Glyma.10G083500	PF00169	PF05641	PF00168	0.125604	0.233762	0.331565
glyma.Wm82.gnm2.ann1.Glyma.10G234600.1	Glyma.10G234600	PF08378	PF01553	PF03372	0.0553288	0.151153	0.256772
glyma.Wm82.gnm2.ann1.Glyma.10G248500.1	Glyma.10G248500	PF00685	PF14111	PF13966	0.0485072	0.0627471	0.23321
glyma.Wm82.gnm2.ann1.Glyma.10G214700.2	Glyma.10G214700	PF13249	PF03200	PF13243	0.0689496	0.0885128	0.206286
glyma.Wm82.gnm2.ann1.Glyma.10G214700.3	Glyma.10G214700	PF13249	PF03200	PF13243	0.0689496	0.0885128	0.206286
glyma.Wm82.gnm2.ann1.Glyma.10G214700.4	Glyma.10G214700	PF13249	PF03200	PF13243	0.0689496	0.0885128	0.206286
glyma.Wm82.gnm2.ann1.Glyma.10G214700.1	Glyma.10G214700	PF13249	PF03200	PF13243	0.0689496	0.0885128	0.206286
glyma.Wm82.gnm2.ann1.Glyma.10G241700.1	Glyma.10G241700	PF00383	PF02906	PF00730	0.041698	0.130541	0.169842
glyma.Wm82.gnm2.ann1.Glyma.10G229200.1	Glyma.10G229200	PF05699	PF13867	PF13891	0.0739234	0.0813447	0.097111
glyma.Wm82.gnm2.ann1.Glyma.10G284700.1	Glyma.10G284700	PF08627	PF00892	PF03151	0.0517482	0.446428	0.476634
glyma.Wm82.gnm2.ann1.Glyma.10G208300.1	Glyma.10G208300	PF03031	PF01656	PF01926	0.0832848	0.127271	0.136841
glyma.Wm82.gnm2.ann1.Glyma.10G208300.2	Glyma.10G208300	PF00578	PF01656	PF01926	0.0649153	0.149103	0.211274
glyma.Wm82.gnm2.ann1.Glyma.10G208300.3	Glyma.10G208300	PF04548	PF01656	PF01926	0.0815467	0.0953949	0.210245
glyma.Wm82.gnm2.ann1.Glyma.10G208300.4	Glyma.10G208300	PF04548	PF02263	PF01926	0.0740964	0.102359	0.216063
glyma.Wm82.gnm2.ann1.Glyma.10G025600.1	Glyma.10G025600	PF00026	PF01094	PF14543	0.0691203	0.0838485	0.188406
glyma.Wm82.gnm2.ann1.Glyma.10G227100.1	Glyma.10G227100	PF02338	PF01753	PF00615	0.0554599	0.0818728	0.100611
glyma.Wm82.gnm2.ann1.Glyma.10G227100.2	Glyma.10G227100	PF00615	PF02320	PF05686	0.0545472	0.0621966	0.0879722
glyma.Wm82.gnm2.ann1.Glyma.10G141600.1	Glyma.10G141600	PF00857	PF02721	PF13456	0.0550833	0.0647932	0.262068
glyma.Wm82.gnm2.ann1.Glyma.10G031300.1	Glyma.10G031300	PF12348	PF14780	PF01248	0.0676326	0.0812	0.166908
glyma.Wm82.gnm2.ann1.Glyma.10G151100.1	Glyma.10G151100	PF00501	PF00361	PF05699	0.0188877	0.0290225	0.032662
glyma.Wm82.gnm2.ann1.Glyma.10G141000.1	Glyma.10G141000	PF03798	PF00361	PF00999	0.0760575	0.125974	0.170472
glyma.Wm82.gnm2.ann1.Glyma.10G141000.2	Glyma.10G141000	PF07885	PF03798	PF16212	0.0856336	0.124512	0.142832
glyma.Wm82.gnm2.ann1.Glyma.10G249000.1	Glyma.10G249000	PF00076	PF10469	PF00252	0.0650651	0.13163	0.340574
glyma.Wm82.gnm2.ann1.Glyma.10G101300.1	Glyma.10G101300	PF03732	PF12776	PF10545	0.0730751	0.0865523	0.391393
glyma.Wm82.gnm2.ann1.Glyma.10G074100.1	Glyma.10G074100	PF00109	PF17177	PF14432	0.00140463	0.143547	0.838069
glyma.Wm82.gnm2.ann1.Glyma.10G240700.1	Glyma.10G240700	PF08172	PF16740	PF07106	0.074592	0.101013	0.156156
glyma.Wm82.gnm2.ann1.Glyma.10G296700.1	Glyma.10G296700	PF00076	PF05627	PF00080	0.0491235	0.0766706	0.42438
glyma.Wm82.gnm2.ann1.Glyma.10G175200.1	Glyma.10G175200	PF00999	PF03151	PF00361	0.112955	0.123251	0.186275
glyma.Wm82.gnm2.ann1.Glyma.10G002300.1	Glyma.10G002300	PF00252	PF16205	PF01556	0.0530956	0.235394	0.240193
glyma.Wm82.gnm2.ann1.Glyma.10G018400.1	Glyma.10G018400	PF07993	PF16363	PF04321	0.0717336	0.379398	0.494831
glyma.Wm82.gnm2.ann1.Glyma.10G018400.2	Glyma.10G018400	PF07993	PF16363	PF04321	0.0717336	0.379398	0.494831
glyma.Wm82.gnm2.ann1.Glyma.10G018400.3	Glyma.10G018400	PF07993	PF16363	PF04321	0.0860011	0.3563	0.489302
glyma.Wm82.gnm2.ann1.Glyma.10G197800.3	Glyma.10G197800	PF01553	PF00690	PF00501	0.000484569	0.00114236	0.99666
glyma.Wm82.gnm2.ann1.Glyma.10G197800.2	Glyma.10G197800	PF01553	PF00690	PF00501	0.000484569	0.00114236	0.99666
glyma.Wm82.gnm2.ann1.Glyma.10G197800.1	Glyma.10G197800	PF01553	PF00690	PF00501	0.000484569	0.00114236	0.99666
glyma.Wm82.gnm2.ann1.Glyma.10G051800.1	Glyma.10G051800	PF01485	PF00097	PF13639	0.0191373	0.284037	0.584566
glyma.Wm82.gnm2.ann1.Glyma.10G051800.2	Glyma.10G051800	PF14634	PF00097	PF13639	0.0361929	0.283132	0.556464
glyma.Wm82.gnm2.ann1.Glyma.10G051800.3	Glyma.10G051800	PF01485	PF00097	PF13639	0.0238964	0.275819	0.603365
glyma.Wm82.gnm2.ann1.Glyma.10G051800.15	Glyma.10G051800	PF01485	PF00097	PF13639	0.0342939	0.249273	0.681393
glyma.Wm82.gnm2.ann1.Glyma.10G051800.16	Glyma.10G051800	PF01485	PF00097	PF13639	0.0342939	0.249273	0.681393
glyma.Wm82.gnm2.ann1.Glyma.10G051800.4	Glyma.10G051800	PF01485	PF00097	PF13639	0.0510937	0.231354	0.627317
glyma.Wm82.gnm2.ann1.Glyma.10G051800.6	Glyma.10G051800	PF01485	PF00097	PF13639	0.060724	0.214622	0.640047
glyma.Wm82.gnm2.ann1.Glyma.10G051800.5	Glyma.10G051800	PF01485	PF00097	PF13639	0.034905	0.229751	0.659108
glyma.Wm82.gnm2.ann1.Glyma.10G051800.10	Glyma.10G051800	PF14634	PF00097	PF13639	0.0101888	0.271697	0.693665
glyma.Wm82.gnm2.ann1.Glyma.10G051800.8	Glyma.10G051800	PF01485	PF00097	PF13639	0.0588625	0.259901	0.613025
glyma.Wm82.gnm2.ann1.Glyma.10G051800.9	Glyma.10G051800	PF01485	PF00097	PF13639	0.0588625	0.259901	0.613025
glyma.Wm82.gnm2.ann1.Glyma.10G051800.7	Glyma.10G051800	PF01485	PF00097	PF13639	0.0334557	0.233819	0.658049
glyma.Wm82.gnm2.ann1.Glyma.10G051800.11	Glyma.10G051800	PF14634	PF00097	PF13639	0.025198	0.292629	0.625737
glyma.Wm82.gnm2.ann1.Glyma.10G051800.12	Glyma.10G051800	PF14634	PF00097	PF13639	0.025198	0.292629	0.625737
glyma.Wm82.gnm2.ann1.Glyma.10G051800.13	Glyma.10G051800	PF14634	PF00097	PF13639	0.0213215	0.239369	0.685405
glyma.Wm82.gnm2.ann1.Glyma.10G051800.14	Glyma.10G051800	PF14634	PF00097	PF13639	0.0213215	0.239369	0.685405
glyma.Wm82.gnm2.ann1.Glyma.10G215300.1	Glyma.10G215300	PF07766	PF01435	PF16035	0.0713896	0.132672	0.215618
glyma.Wm82.gnm2.ann1.Glyma.10G215300.4	Glyma.10G215300	PF08511	PF01435	PF16035	0.0775225	0.147168	0.189491
glyma.Wm82.gnm2.ann1.Glyma.10G215300.3	Glyma.10G215300	PF04280	PF08511	PF00636	0.0744339	0.179741	0.222788
glyma.Wm82.gnm2.ann1.Glyma.10G215300.2	Glyma.10G215300	PF10075	PF17874	PF00497	0.0812367	0.0835064	0.162933
glyma.Wm82.gnm2.ann1.Glyma.10G249800.1	Glyma.10G249800	PF10551	PF00651	PF00134	0.0021191	0.0080212	0.983132
glyma.Wm82.gnm2.ann1.Glyma.10G249800.2	Glyma.10G249800	PF10551	PF00651	PF00134	0.00692828	0.0157143	0.959859
glyma.Wm82.gnm2.ann1.Glyma.10G249800.3	Glyma.10G249800	PF10551	PF00651	PF00134	0.00692828	0.0157143	0.959859
glyma.Wm82.gnm2.ann1.Glyma.10G249800.4	Glyma.10G249800	PF10551	PF00651	PF00134	0.00692828	0.0157143	0.959859
glyma.Wm82.gnm2.ann1.Glyma.10G249800.5	Glyma.10G249800	PF10551	PF00651	PF00134	0.0105229	0.0221979	0.945531
glyma.Wm82.gnm2.ann1.Glyma.10G022300.2	Glyma.10G022300	PF00024	PF10419	PF06839	0.0489634	0.117111	0.132535
glyma.Wm82.gnm2.ann1.Glyma.10G022300.1	Glyma.10G022300	PF00024	PF10419	PF06839	0.0489634	0.117111	0.132535
glyma.Wm82.gnm2.ann1.Glyma.10G130600.1	Glyma.10G130600	PF04774	PF15477	PF04927	0.0595065	0.103375	0.455109
glyma.Wm82.gnm2.ann1.Glyma.10G060900.1	Glyma.10G060900	PF00188	PF14380	PF13947	0.150261	0.155976	0.218412
glyma.Wm82.gnm2.ann1.Glyma.10G017100.1	Glyma.10G017100	PF00026	PF11721	PF04043	0.000418951	0.00139555	0.996485
glyma.Wm82.gnm2.ann1.Glyma.10G236600.1	Glyma.10G236600	PF12776	PF10545	PF00249	0.00362835	0.0108195	0.98209
glyma.Wm82.gnm2.ann1.Glyma.10G236600.2	Glyma.10G236600	PF12776	PF10545	PF00249	0.00362835	0.0108195	0.98209
glyma.Wm82.gnm2.ann1.Glyma.10G257000.1	Glyma.10G257000	PF03629	PF02837	PF02018	0.0569194	0.0666335	0.645635
glyma.Wm82.gnm2.ann1.Glyma.10G112800.1	Glyma.10G112800	PF00319	PF07145	PF06003	0.077533	0.0923101	0.138163
glyma.Wm82.gnm2.ann1.Glyma.10G258000.4	Glyma.10G258000	PF12717	PF00564	PF00651	0.000187307	0.000458303	0.997912
glyma.Wm82.gnm2.ann1.Glyma.10G258000.1	Glyma.10G258000	PF12717	PF00564	PF00651	0.000187307	0.000458303	0.997912
glyma.Wm82.gnm2.ann1.Glyma.10G258000.2	Glyma.10G258000	PF12717	PF00564	PF00651	0.000187307	0.000458303	0.997912
glyma.Wm82.gnm2.ann1.Glyma.10G258000.3	Glyma.10G258000	PF12717	PF00564	PF00651	0.000187307	0.000458303	0.997912
glyma.Wm82.gnm2.ann1.Glyma.10G086300.1	Glyma.10G086300	PF00010	PF07716	PF00319	4.62625e-05	9.38113e-05	0.999798
glyma.Wm82.gnm2.ann1.Glyma.10G034500.1	Glyma.10G034500	PF00472	PF01775	PF05699	0.0418539	0.046184	0.0940294
glyma.Wm82.gnm2.ann1.Glyma.10G234100.1	Glyma.10G234100	PF00615	PF00010	PF00564	0.0052959	0.0147534	0.958057
glyma.Wm82.gnm2.ann1.Glyma.10G189300.1	Glyma.10G189300	PF09258	PF13632	PF00535	0.0998724	0.197983	0.601332
glyma.Wm82.gnm2.ann1.Glyma.10G203500.1	Glyma.10G203500	PF05362	PF07969	PF00571	0.0372775	0.0858452	0.215051
glyma.Wm82.gnm2.ann1.Glyma.10G235500.1	Glyma.10G235500	PF03732	PF03364	PF05699	0.0356347	0.0415429	0.0428266
glyma.Wm82.gnm2.ann1.Glyma.10G009500.1	Glyma.10G009500	PF16212	PF01794	PF03798	0.0737462	0.0961313	0.63227
glyma.Wm82.gnm2.ann1.Glyma.10G009500.2	Glyma.10G009500	PF06454	PF01794	PF03798	0.0619687	0.100748	0.738067
glyma.Wm82.gnm2.ann1.Glyma.10G243900.1	Glyma.10G243900	PF03810	PF18137	PF08389	0.111806	0.229264	0.262018
glyma.Wm82.gnm2.ann1.Glyma.10G243900.2	Glyma.10G243900	PF03810	PF18137	PF08389	0.13808	0.175186	0.31351
glyma.Wm82.gnm2.ann1.Glyma.10G103600.1	Glyma.10G103600	PF00168	PF02214	PF03171	0.0589337	0.0669402	0.135706
glyma.Wm82.gnm2.ann1.Glyma.10G098500.1	Glyma.10G098500	PF01794	PF00361	PF03798	0.0684157	0.126977	0.148026
glyma.Wm82.gnm2.ann1.Glyma.10G206200.1	Glyma.10G206200	PF07885	PF00892	PF03798	0.0705474	0.0751145	0.116936
glyma.Wm82.gnm2.ann1.Glyma.10G148200.4	Glyma.10G148200	PF10650	PF14383	PF14309	0.00907498	0.157147	0.807744
glyma.Wm82.gnm2.ann1.Glyma.10G148200.1	Glyma.10G148200	PF10650	PF14383	PF14309	0.00907498	0.157147	0.807744
glyma.Wm82.gnm2.ann1.Glyma.10G148200.3	Glyma.10G148200	PF10650	PF14383	PF14309	0.00705109	0.161031	0.813366
glyma.Wm82.gnm2.ann1.Glyma.10G148200.2	Glyma.10G148200	PF10650	PF14383	PF14309	0.0314924	0.214658	0.686818
glyma.Wm82.gnm2.ann1.Glyma.10G148200.5	Glyma.10G148200	PF10650	PF14383	PF14309	0.012896	0.212876	0.731052
glyma.Wm82.gnm2.ann1.Glyma.10G137500.1	Glyma.10G137500	PF00004	PF04851	PF13086	0.159764	0.266081	0.360418
glyma.Wm82.gnm2.ann1.Glyma.10G219800.1	Glyma.10G219800	PF00481	PF04043	PF00141	8.6498e-07	1.80084e-05	0.99998
glyma.Wm82.gnm2.ann1.Glyma.10G187300.1	Glyma.10G187300	PF14693	PF03328	PF00571	0.0636154	0.0662207	0.296507
glyma.Wm82.gnm2.ann1.Glyma.10G187300.2	Glyma.10G187300	PF14693	PF03328	PF00571	0.0636154	0.0662207	0.296507
glyma.Wm82.gnm2.ann1.Glyma.10G276700.1	Glyma.10G276700	PF02453	PF01061	PF06813	0.00435063	0.0372362	0.917752
glyma.Wm82.gnm2.ann1.Glyma.10G107100.1	Glyma.10G107100	PF03446	PF02737	PF00534	0.104011	0.154704	0.26703
glyma.Wm82.gnm2.ann1.Glyma.10G114500.1	Glyma.10G114500	PF00505	PF00076	PF00439	0.0368409	0.0634564	0.111402
glyma.Wm82.gnm2.ann1.Glyma.10G009700.1	Glyma.10G009700	PF14111	PF07766	PF03364	0.0305549	0.0322597	0.70917
glyma.Wm82.gnm2.ann1.Glyma.10G009700.2	Glyma.10G009700	PF14111	PF07766	PF03364	0.0305549	0.0322597	0.70917
glyma.Wm82.gnm2.ann1.Glyma.10G008200.1	Glyma.10G008200	PF17874	PF12862	PF01399	0.0502151	0.0509951	0.305686
glyma.Wm82.gnm2.ann1.Glyma.10G265700.1	Glyma.10G265700	PF01273	PF00026	PF02469	0.068207	0.0957465	0.717429
glyma.Wm82.gnm2.ann1.Glyma.10G052200.1	Glyma.10G052200	PF05699	PF00646	PF13456	0.0481563	0.0608431	0.0622749
glyma.Wm82.gnm2.ann1.Glyma.10G027400.1	Glyma.10G027400	PF12923	PF07303	PF06047	0.000156484	0.00163811	0.997793
glyma.Wm82.gnm2.ann1.Glyma.10G152100.1	Glyma.10G152100	PF01106	PF01883	PF00403	0.00020464	0.00022078	0.999532
glyma.Wm82.gnm2.ann1.Glyma.10G211000.1	Glyma.10G211000	PF00361	PF00892	PF00909	0.0387962	0.114242	0.708855
glyma.Wm82.gnm2.ann1.Glyma.10G211000.2	Glyma.10G211000	PF00137	PF00909	PF00361	0.0862772	0.223917	0.451722
glyma.Wm82.gnm2.ann1.Glyma.10G166200.2	Glyma.10G166200	PF11835	PF04059	PF00076	0.000272013	0.0154021	0.981167
glyma.Wm82.gnm2.ann1.Glyma.10G166200.1	Glyma.10G166200	PF11835	PF04059	PF00076	0.000272014	0.0154021	0.981167
glyma.Wm82.gnm2.ann1.Glyma.10G188000.1	Glyma.10G188000	PF13878	PF13919	PF14383	0.0321737	0.0746832	0.629218
glyma.Wm82.gnm2.ann1.Glyma.10G064200.1	Glyma.10G064200	PF00534	PF05686	PF03016	0.00220256	0.010581	0.984688
glyma.Wm82.gnm2.ann1.Glyma.10G101400.1	Glyma.10G101400	PF14634	PF00097	PF13639	0.0233126	0.276348	0.66146
glyma.Wm82.gnm2.ann1.Glyma.10G246200.1	Glyma.10G246200	PF00046	PF00505	PF00010	0.0531921	0.0579524	0.592485
glyma.Wm82.gnm2.ann1.Glyma.10G191200.1	Glyma.10G191200	PF00557	PF00857	PF05116	0.0829228	0.110625	0.217524
glyma.Wm82.gnm2.ann1.Glyma.10G191200.2	Glyma.10G191200	PF03031	PF10615	PF00571	0.113999	0.116062	0.18914
glyma.Wm82.gnm2.ann1.Glyma.10G191200.3	Glyma.10G191200	PF01883	PF03031	PF00571	0.0498064	0.074282	0.519009
glyma.Wm82.gnm2.ann1.Glyma.10G166300.1	Glyma.10G166300	PF01869	PF08100	PF01048	0.0791951	0.081593	0.214305
glyma.Wm82.gnm2.ann1.Glyma.10G154100.1	Glyma.10G154100	PF02037	PF13178	PF07557	0.0979841	0.120564	0.135625
glyma.Wm82.gnm2.ann1.Glyma.10G081300.1	Glyma.10G081300	PF01636	PF07714	PF00069	3.40018e-05	0.0329288	0.967012
glyma.Wm82.gnm2.ann1.Glyma.10G171400.1	Glyma.10G171400	PF03372	PF01167	PF01823	0.035604	0.0380098	0.543852
glyma.Wm82.gnm2.ann1.Glyma.10G155100.1	Glyma.10G155100	PF12110	PF00134	PF10075	0.0473338	0.0544036	0.72978
glyma.Wm82.gnm2.ann1.Glyma.10G041500.1	Glyma.10G041500	PF00883	PF02581	PF00294	0.000114298	0.000116103	0.99962
glyma.Wm82.gnm2.ann1.Glyma.10G041500.2	Glyma.10G041500	PF00883	PF00591	PF00294	4.94729e-05	9.43067e-05	0.999705
glyma.Wm82.gnm2.ann1.Glyma.10G078000.1	Glyma.10G078000	PF00135	PF05699	PF05678	0.0543481	0.0560834	0.0855734
glyma.Wm82.gnm2.ann1.Glyma.10G121900.1	Glyma.10G121900	PF05699	PF14372	PF02892	0.0188653	0.0320148	0.940245
glyma.Wm82.gnm2.ann1.Glyma.10G058100.1	Glyma.10G058100	PF00534	PF00682	PF00180	3.61848e-05	4.33603e-05	0.999847
glyma.Wm82.gnm2.ann1.Glyma.10G058100.2	Glyma.10G058100	PF01028	PF01648	PF00180	0.00150905	0.00477099	0.974253
glyma.Wm82.gnm2.ann1.Glyma.10G220600.1	Glyma.10G220600	PF07743	PF00210	PF00550	0.105761	0.105977	0.147304
glyma.Wm82.gnm2.ann1.Glyma.10G291000.1	Glyma.10G291000	PF01466	PF11938	PF05699	0.0521765	0.0695197	0.0890402
glyma.Wm82.gnm2.ann1.Glyma.10G291000.2	Glyma.10G291000	PF10545	PF00808	PF00505	0.073794	0.0858099	0.128122
glyma.Wm82.gnm2.ann1.Glyma.10G115500.1	Glyma.10G115500	PF06974	PF01435	PF00027	0.0786333	0.0805957	0.118317
glyma.Wm82.gnm2.ann1.Glyma.10G011500.1	Glyma.10G011500	PF00234	PF14543	PF00646	0.083797	0.102738	0.167873
glyma.Wm82.gnm2.ann1.Glyma.10G110200.1	Glyma.10G110200	PF13456	PF00294	PF00082	0.0521311	0.0647178	0.128946
glyma.Wm82.gnm2.ann1.Glyma.10G121200.1	Glyma.10G121200	PF05699	PF01743	PF00646	0.0615779	0.0999102	0.143056
glyma.Wm82.gnm2.ann1.Glyma.10G100100.1	Glyma.10G100100	PF10260	PF02453	PF07885	0.032783	0.0360867	0.048772
glyma.Wm82.gnm2.ann1.Glyma.10G088900.1	Glyma.10G088900	PF00188	PF12708	PF00754	0.0799364	0.157402	0.191228
glyma.Wm82.gnm2.ann1.Glyma.10G058200.1	Glyma.10G058200	PF00550	PF05193	PF01661	0.0610502	0.0624867	0.0973179
glyma.Wm82.gnm2.ann1.Glyma.10G141700.1	Glyma.10G141700	PF09430	PF07883	PF00190	4.86858e-05	0.054283	0.945403
glyma.Wm82.gnm2.ann1.Glyma.10G168700.1	Glyma.10G168700	PF00534	PF17874	PF13844	0.00128649	0.00210469	0.991996
glyma.Wm82.gnm2.ann1.Glyma.10G168700.2	Glyma.10G168700	PF12796	PF17177	PF13844	0.0151622	0.0259546	0.914814
glyma.Wm82.gnm2.ann1.Glyma.10G168700.3	Glyma.10G168700	PF00497	PF00534	PF13844	0.000131461	0.00184064	0.995993
glyma.Wm82.gnm2.ann1.Glyma.10G277900.1	Glyma.10G277900	PF07741	PF03763	PF00505	0.0478279	0.0549836	0.629905
glyma.Wm82.gnm2.ann1.Glyma.10G202400.1	Glyma.10G202400	PF04413	PF01553	PF00501	0.0629522	0.147073	0.181767
glyma.Wm82.gnm2.ann1.Glyma.10G079100.1	Glyma.10G079100	PF16212	PF13962	PF03798	0.0644105	0.137719	0.378191
glyma.Wm82.gnm2.ann1.Glyma.10G260100.1	Glyma.10G260100	PF00646	PF17177	PF14432	0.102774	0.123444	0.560297
glyma.Wm82.gnm2.ann1.Glyma.10G176500.1	Glyma.10G176500	PF08241	PF00891	PF08100	0.000243465	0.104538	0.894787
glyma.Wm82.gnm2.ann1.Glyma.10G043500.1	Glyma.10G043500	PF02721	PF01105	PF00481	0.050647	0.0740728	0.138299
glyma.Wm82.gnm2.ann1.Glyma.10G070400.1	Glyma.10G070400	PF05699	PF12717	PF03810	0.0366924	0.0964362	0.105865
glyma.Wm82.gnm2.ann1.Glyma.10G258500.1	Glyma.10G258500	PF01753	PF00098	PF17032	0.0573863	0.164878	0.215412
glyma.Wm82.gnm2.ann1.Glyma.10G182600.1	Glyma.10G182600	PF05699	PF10075	PF08718	0.00428677	0.0243818	0.951091
glyma.Wm82.gnm2.ann1.Glyma.10G182600.2	Glyma.10G182600	PF00370	PF08718	PF00171	0.0490836	0.0511331	0.0634385
glyma.Wm82.gnm2.ann1.Glyma.10G166100.1	Glyma.10G166100	PF03501	PF00307	PF00685	0.0950959	0.120248	0.29824
glyma.Wm82.gnm2.ann1.Glyma.10G166100.2	Glyma.10G166100	PF03501	PF00307	PF00685	0.0950959	0.120248	0.29824
glyma.Wm82.gnm2.ann1.Glyma.10G078400.1	Glyma.10G078400	PF13462	PF13905	PF00578	0.000128527	0.00656954	0.99268
glyma.Wm82.gnm2.ann1.Glyma.10G078400.2	Glyma.10G078400	PF00085	PF13905	PF00578	0.000202092	0.0145845	0.984402
glyma.Wm82.gnm2.ann1.Glyma.10G214200.1	Glyma.10G214200	PF00550	PF05678	PF00631	0.0679689	0.0986451	0.101186
glyma.Wm82.gnm2.ann1.Glyma.10G214200.3	Glyma.10G214200	PF00550	PF05678	PF00631	0.0679689	0.0986451	0.101186
glyma.Wm82.gnm2.ann1.Glyma.10G214200.2	Glyma.10G214200	PF00550	PF05678	PF00631	0.0679689	0.0986451	0.101186
glyma.Wm82.gnm2.ann1.Glyma.10G214200.4	Glyma.10G214200	PF00171	PF00550	PF00248	0.0457655	0.0503116	0.0889306
glyma.Wm82.gnm2.ann1.Glyma.10G214200.5	Glyma.10G214200	PF05678	PF00248	PF00550	0.0580224	0.0610727	0.18494
glyma.Wm82.gnm2.ann1.Glyma.10G093700.1	Glyma.10G093700	PF14372	PF05699	PF02892	0.0812385	0.249496	0.532267
glyma.Wm82.gnm2.ann1.Glyma.10G193300.1	Glyma.10G193300	PF08392	PF17135	PF00234	0.0285941	0.034168	0.0358047
glyma.Wm82.gnm2.ann1.Glyma.10G108000.1	Glyma.10G108000	PF00125	PF07714	PF00069	0.00271366	0.299875	0.679203
glyma.Wm82.gnm2.ann1.Glyma.10G108000.2	Glyma.10G108000	PF00089	PF07714	PF00069	0.00228181	0.317992	0.66879
glyma.Wm82.gnm2.ann1.Glyma.10G108000.3	Glyma.10G108000	PF00125	PF07714	PF00069	0.00292704	0.216073	0.774596
glyma.Wm82.gnm2.ann1.Glyma.10G108000.4	Glyma.10G108000	PF00125	PF07714	PF00069	0.000644699	0.207578	0.78827
glyma.Wm82.gnm2.ann1.Glyma.10G108000.5	Glyma.10G108000	PF00125	PF07714	PF00069	0.00194387	0.22019	0.774104
glyma.Wm82.gnm2.ann1.Glyma.10G291500.1	Glyma.10G291500	PF07557	PF08698	PF00472	0.0686883	0.0750501	0.323475
glyma.Wm82.gnm2.ann1.Glyma.10G291500.2	Glyma.10G291500	PF00327	PF05486	PF01778	0.0529072	0.204529	0.322071
glyma.Wm82.gnm2.ann1.Glyma.10G088200.1	Glyma.10G088200	PF00685	PF08768	PF08547	0.085478	0.0915644	0.105294
glyma.Wm82.gnm2.ann1.Glyma.10G232600.1	Glyma.10G232600	PF02225	PF06813	PF01699	0.00529438	0.0100986	0.965017
glyma.Wm82.gnm2.ann1.Glyma.10G232600.2	Glyma.10G232600	PF02225	PF06813	PF01699	0.00529438	0.0100986	0.965017
glyma.Wm82.gnm2.ann1.Glyma.10G232600.3	Glyma.10G232600	PF02225	PF06813	PF01699	0.00529436	0.0100985	0.965017
glyma.Wm82.gnm2.ann1.Glyma.10G098600.1	Glyma.10G098600	PF00443	PF00076	PF00035	0.0272702	0.0629556	0.169965
glyma.Wm82.gnm2.ann1.Glyma.10G251300.5	Glyma.10G251300	PF01852	PF00046	PF00588	0.0485414	0.164776	0.585182
glyma.Wm82.gnm2.ann1.Glyma.10G251300.1	Glyma.10G251300	PF01852	PF00046	PF00588	0.0485414	0.164776	0.585182
glyma.Wm82.gnm2.ann1.Glyma.10G251300.3	Glyma.10G251300	PF01852	PF00046	PF00588	0.0485414	0.164776	0.585182
glyma.Wm82.gnm2.ann1.Glyma.10G251300.7	Glyma.10G251300	PF01852	PF00046	PF00588	0.0485414	0.164776	0.585182
glyma.Wm82.gnm2.ann1.Glyma.10G251300.6	Glyma.10G251300	PF01852	PF00046	PF00588	0.0469375	0.219826	0.485091
glyma.Wm82.gnm2.ann1.Glyma.10G251300.2	Glyma.10G251300	PF01852	PF00046	PF00588	0.0469375	0.219826	0.485091
glyma.Wm82.gnm2.ann1.Glyma.10G251300.4	Glyma.10G251300	PF01852	PF00046	PF00588	0.0469375	0.219826	0.485091
glyma.Wm82.gnm2.ann1.Glyma.10G251300.8	Glyma.10G251300	PF01852	PF00046	PF00588	0.0469375	0.219826	0.485091
glyma.Wm82.gnm2.ann1.Glyma.10G004100.2	Glyma.10G004100	PF09133	PF07524	PF13919	0.0681059	0.0694083	0.109293
glyma.Wm82.gnm2.ann1.Glyma.10G274500.1	Glyma.10G274500	PF02140	PF02953	PF06839	0.0414084	0.0510918	0.098075
glyma.Wm82.gnm2.ann1.Glyma.10G103400.1	Glyma.10G103400	PF01485	PF13639	PF00097	0.118074	0.180293	0.236068
glyma.Wm82.gnm2.ann1.Glyma.10G078600.1	Glyma.10G078600	PF11721	PF00026	PF14543	0.000970321	0.0936187	0.897497
glyma.Wm82.gnm2.ann1.Glyma.10G206700.1	Glyma.10G206700	PF00141	PF00631	PF05678	0.0383418	0.0475986	0.0591148
glyma.Wm82.gnm2.ann1.Glyma.10G006400.1	Glyma.10G006400	PF12923	PF00472	PF00076	0.00730095	0.0342974	0.882212
glyma.Wm82.gnm2.ann1.Glyma.10G037700.1	Glyma.10G037700	PF10536	PF12776	PF00447	0.0423272	0.0429115	0.0651607
glyma.Wm82.gnm2.ann1.Glyma.10G282300.1	Glyma.10G282300	PF01636	PF06574	PF01494	0.0759945	0.0904404	0.108899
glyma.Wm82.gnm2.ann1.Glyma.10G225300.1	Glyma.10G225300	PF13867	PF12776	PF04782	0.0704396	0.0763953	0.0831341
glyma.Wm82.gnm2.ann1.Glyma.10G022900.1	Glyma.10G022900	PF00326	PF07859	PF00135	0.0350731	0.234812	0.725438
glyma.Wm82.gnm2.ann1.Glyma.10G009800.1	Glyma.10G009800	PF00626	PF07228	PF00481	8.7522e-06	0.0178469	0.982134
glyma.Wm82.gnm2.ann1.Glyma.10G009800.2	Glyma.10G009800	PF00294	PF07228	PF00481	2.14029e-05	0.0648351	0.935059
glyma.Wm82.gnm2.ann1.Glyma.10G009800.4	Glyma.10G009800	PF00626	PF07228	PF00481	1.48312e-05	0.0737364	0.926197
glyma.Wm82.gnm2.ann1.Glyma.10G009800.3	Glyma.10G009800	PF00626	PF07228	PF00481	1.48312e-05	0.0737364	0.926197
glyma.Wm82.gnm2.ann1.Glyma.10G008800.1	Glyma.10G008800	PF00010	PF10172	PF05699	0.0355723	0.0983046	0.15859
glyma.Wm82.gnm2.ann1.Glyma.10G196500.1	Glyma.10G196500	PF06148	PF02845	PF16740	0.0343416	0.0484552	0.611265
glyma.Wm82.gnm2.ann1.Glyma.10G006100.1	Glyma.10G006100	PF13649	PF05686	PF13679	0.0764739	0.160209	0.300495
glyma.Wm82.gnm2.ann1.Glyma.10G189400.1	Glyma.10G189400	PF13649	PF08241	PF01593	0.0332664	0.0426234	0.787872
glyma.Wm82.gnm2.ann1.Glyma.10G152300.1	Glyma.10G152300	PF02854	PF00168	PF00307	0.0504256	0.0742894	0.154383
glyma.Wm82.gnm2.ann1.Glyma.10G152300.2	Glyma.10G152300	PF00536	PF07647	PF00307	0.0721882	0.0730893	0.129974
glyma.Wm82.gnm2.ann1.Glyma.10G265100.1	Glyma.10G265100	PF00042	PF00171	PF13456	0.0449961	0.0585695	0.0665699
glyma.Wm82.gnm2.ann1.Glyma.10G292300.1	Glyma.10G292300	PF04782	PF00134	PF10075	0.00572029	0.0220737	0.942916
glyma.Wm82.gnm2.ann1.Glyma.10G292300.3	Glyma.10G292300	PF00651	PF00134	PF10075	0.0131226	0.0435208	0.87222
glyma.Wm82.gnm2.ann1.Glyma.10G292300.2	Glyma.10G292300	PF04782	PF00134	PF10075	0.0101281	0.0278409	0.913384
glyma.Wm82.gnm2.ann1.Glyma.10G292300.4	Glyma.10G292300	PF00134	PF04782	PF10075	0.151096	0.169585	0.241842
glyma.Wm82.gnm2.ann1.Glyma.10G102100.1	Glyma.10G102100	PF00135	PF00561	PF00326	0.0478269	0.202535	0.229886
glyma.Wm82.gnm2.ann1.Glyma.10G266600.1	Glyma.10G266600	PF12931	PF12796	PF07651	0.127296	0.155547	0.291984
glyma.Wm82.gnm2.ann1.Glyma.10G266600.2	Glyma.10G266600	PF12796	PF00787	PF00888	0.0577091	0.0581069	0.143882
glyma.Wm82.gnm2.ann1.Glyma.10G037100.1	Glyma.10G037100	PF07883	PF08768	PF00190	0.0593124	0.0732328	0.836931
glyma.Wm82.gnm2.ann1.Glyma.10G242600.1	Glyma.10G242600	PF07969	PF01979	PF02668	0.111986	0.142917	0.176113
glyma.Wm82.gnm2.ann1.Glyma.10G146600.3	Glyma.10G146600	PF00892	PF00916	PF00999	0.0441355	0.116999	0.661502
glyma.Wm82.gnm2.ann1.Glyma.10G146600.1	Glyma.10G146600	PF00892	PF00916	PF00999	0.0441355	0.116999	0.661502
glyma.Wm82.gnm2.ann1.Glyma.10G146600.2	Glyma.10G146600	PF08627	PF00892	PF00999	0.0990281	0.153198	0.473188
glyma.Wm82.gnm2.ann1.Glyma.10G288300.1	Glyma.10G288300	PF03763	PF06886	PF00505	0.00146698	0.0237294	0.971466
glyma.Wm82.gnm2.ann1.Glyma.10G149600.1	Glyma.10G149600	PF00626	PF07228	PF00481	3.43316e-05	0.0398569	0.960087
glyma.Wm82.gnm2.ann1.Glyma.10G137800.1	Glyma.10G137800	PF04851	PF00271	PF00270	0.082771	0.137749	0.746964
glyma.Wm82.gnm2.ann1.Glyma.10G175500.1	Glyma.10G175500	PF00089	PF01521	PF00026	0.0622174	0.0626875	0.0973295
glyma.Wm82.gnm2.ann1.Glyma.10G273500.1	Glyma.10G273500	PF02223	PF01926	PF06414	0.107041	0.112708	0.439266
glyma.Wm82.gnm2.ann1.Glyma.10G255500.1	Glyma.10G255500	PF03446	PF01565	PF00091	0.0010579	0.00230411	0.994682
glyma.Wm82.gnm2.ann1.Glyma.10G132200.1	Glyma.10G132200	PF10545	PF12776	PF00249	0.00365983	0.00733604	0.98641
glyma.Wm82.gnm2.ann1.Glyma.10G093800.1	Glyma.10G093800	PF12796	PF17177	PF14432	0.0182561	0.222867	0.670294
glyma.Wm82.gnm2.ann1.Glyma.10G025300.1	Glyma.10G025300	PF06414	PF04548	PF01926	0.122786	0.318061	0.43843
glyma.Wm82.gnm2.ann1.Glyma.10G145400.2	Glyma.10G145400	PF13962	PF00689	PF02453	0.0218399	0.0810624	0.818996
glyma.Wm82.gnm2.ann1.Glyma.10G145400.1	Glyma.10G145400	PF13962	PF00689	PF02453	0.0218399	0.0810624	0.818996
glyma.Wm82.gnm2.ann1.Glyma.10G085700.1	Glyma.10G085700	PF04419	PF07716	PF00319	5.56749e-05	0.000176729	0.999545
glyma.Wm82.gnm2.ann1.Glyma.10G084600.1	Glyma.10G084600	PF01541	PF00046	PF01844	0.0400956	0.044308	0.0482448
glyma.Wm82.gnm2.ann1.Glyma.10G184900.1	Glyma.10G184900	PF00933	PF00291	PF13180	0.107279	0.164011	0.357578
glyma.Wm82.gnm2.ann1.Glyma.10G184900.2	Glyma.10G184900	PF01915	PF02782	PF13180	0.0433103	0.081395	0.352081
glyma.Wm82.gnm2.ann1.Glyma.10G113500.1	Glyma.10G113500	PF02861	PF00472	PF04755	0.0380836	0.118409	0.120325
glyma.Wm82.gnm2.ann1.Glyma.10G071800.1	Glyma.10G071800	PF05362	PF00291	PF00091	0.000265921	0.00149988	0.997972
glyma.Wm82.gnm2.ann1.Glyma.10G247800.1	Glyma.10G247800	PF01094	PF03070	PF01435	0.0457212	0.0908037	0.107226
glyma.Wm82.gnm2.ann1.Glyma.10G247800.2	Glyma.10G247800	PF01094	PF01397	PF04909	0.0691922	0.0795854	0.0930421
glyma.Wm82.gnm2.ann1.Glyma.10G247800.3	Glyma.10G247800	PF01397	PF01094	PF04909	0.0426252	0.0653753	0.209989
glyma.Wm82.gnm2.ann1.Glyma.10G111200.1	Glyma.10G111200	PF00059	PF13966	PF14416	5.43786e-05	8.60583e-05	0.999585
glyma.Wm82.gnm2.ann1.Glyma.10G205500.1	Glyma.10G205500	PF09763	PF00550	PF01326	0.039599	0.0406878	0.0851679
glyma.Wm82.gnm2.ann1.Glyma.10G150300.1	Glyma.10G150300	PF04446	PF00171	PF00685	0.0427074	0.0454301	0.0564321
glyma.Wm82.gnm2.ann1.Glyma.10G027200.1	Glyma.10G027200	PF07734	PF05641	PF08662	0.148753	0.226712	0.262369
glyma.Wm82.gnm2.ann1.Glyma.10G210100.1	Glyma.10G210100	PF01471	PF12656	PF00505	0.0603635	0.0616317	0.17828
glyma.Wm82.gnm2.ann1.Glyma.10G210100.2	Glyma.10G210100	PF01471	PF12656	PF00505	0.0603635	0.0616317	0.17828
glyma.Wm82.gnm2.ann1.Glyma.10G154800.1	Glyma.10G154800	PF13962	PF03798	PF04893	0.0536638	0.291297	0.37537
glyma.Wm82.gnm2.ann1.Glyma.10G075700.1	Glyma.10G075700	PF01061	PF04893	PF13962	0.0686395	0.155817	0.480694
glyma.Wm82.gnm2.ann1.Glyma.10G137200.1	Glyma.10G137200	PF13456	PF00249	PF12776	0.105234	0.106141	0.633513
glyma.Wm82.gnm2.ann1.Glyma.10G083700.1	Glyma.10G083700	PF02037	PF00168	PF00650	0.0520734	0.110044	0.180781
glyma.Wm82.gnm2.ann1.Glyma.10G083700.2	Glyma.10G083700	PF02037	PF00168	PF00650	0.0520734	0.110044	0.180781
glyma.Wm82.gnm2.ann1.Glyma.10G270100.1	Glyma.10G270100	PF10520	PF00487	PF14360	0.0117566	0.0853724	0.886569
glyma.Wm82.gnm2.ann1.Glyma.10G270100.3	Glyma.10G270100	PF10520	PF00487	PF14360	0.0117566	0.0853724	0.886569
glyma.Wm82.gnm2.ann1.Glyma.10G270100.4	Glyma.10G270100	PF07786	PF00487	PF14360	0.017278	0.0303288	0.932722
glyma.Wm82.gnm2.ann1.Glyma.10G270100.2	Glyma.10G270100	PF07786	PF00487	PF14360	0.017278	0.0303288	0.932722
glyma.Wm82.gnm2.ann1.Glyma.10G082600.1	Glyma.10G082600	PF00160	PF04059	PF00076	0.00176953	0.00598316	0.985196
glyma.Wm82.gnm2.ann1.Glyma.10G244200.1	Glyma.10G244200	PF09588	PF04755	PF01471	0.0503615	0.0783456	0.143189
glyma.Wm82.gnm2.ann1.Glyma.10G244200.2	Glyma.10G244200	PF00293	PF04755	PF01471	0.0450827	0.0656114	0.162927
glyma.Wm82.gnm2.ann1.Glyma.10G244200.3	Glyma.10G244200	PF00128	PF00754	PF00248	0.076372	0.1381	0.184702
glyma.Wm82.gnm2.ann1.Glyma.10G244200.4	Glyma.10G244200	PF00128	PF00754	PF00248	0.0669236	0.0756595	0.204838
glyma.Wm82.gnm2.ann1.Glyma.10G244200.5	Glyma.10G244200	PF00059	PF00128	PF00754	0.0772713	0.120542	0.132735
glyma.Wm82.gnm2.ann1.Glyma.10G024000.1	Glyma.10G024000	PF05627	PF04927	PF13266	0.12297	0.127206	0.139325
glyma.Wm82.gnm2.ann1.Glyma.10G026900.1	Glyma.10G026900	PF05047	PF00472	PF01765	0.00394123	0.00944829	0.969112
glyma.Wm82.gnm2.ann1.Glyma.10G075200.1	Glyma.10G075200	PF07743	PF01928	PF00787	0.000101547	0.000317378	0.999191
glyma.Wm82.gnm2.ann1.Glyma.10G075200.2	Glyma.10G075200	PF07743	PF01928	PF00787	9.55605e-05	0.000833912	0.998782
glyma.Wm82.gnm2.ann1.Glyma.10G082800.4	Glyma.10G082800	PF00443	PF00076	PF07145	0.0257285	0.0407745	0.117376
glyma.Wm82.gnm2.ann1.Glyma.10G082800.2	Glyma.10G082800	PF00443	PF00076	PF07145	0.0257285	0.0407745	0.117376
glyma.Wm82.gnm2.ann1.Glyma.10G082800.5	Glyma.10G082800	PF00443	PF00076	PF07145	0.0257285	0.0407745	0.117376
glyma.Wm82.gnm2.ann1.Glyma.10G082800.3	Glyma.10G082800	PF00443	PF00076	PF07145	0.0257285	0.0407745	0.117376
glyma.Wm82.gnm2.ann1.Glyma.10G082800.1	Glyma.10G082800	PF00443	PF00076	PF07145	0.0257285	0.0407745	0.117376
glyma.Wm82.gnm2.ann1.Glyma.10G008700.1	Glyma.10G008700	PF12047	PF00855	PF00443	0.0384229	0.048909	0.0489499
glyma.Wm82.gnm2.ann1.Glyma.10G008700.2	Glyma.10G008700	PF15612	PF09133	PF00168	0.0413232	0.0504453	0.0521135
glyma.Wm82.gnm2.ann1.Glyma.10G008700.4	Glyma.10G008700	PF13919	PF01753	PF07744	0.0637242	0.0704904	0.104362
glyma.Wm82.gnm2.ann1.Glyma.10G008700.3	Glyma.10G008700	PF00855	PF12047	PF15612	0.0560647	0.0680388	0.0958641
glyma.Wm82.gnm2.ann1.Glyma.10G275100.1	Glyma.10G275100	PF16421	PF00364	PF11976	0.0254996	0.0542577	0.833422
glyma.Wm82.gnm2.ann1.Glyma.10G000600.1	Glyma.10G000600	PF12862	PF17874	PF17177	0.0308663	0.126773	0.550459
glyma.Wm82.gnm2.ann1.Glyma.10G268800.1	Glyma.10G268800	PF00443	PF02902	PF00646	0.0318321	0.0328289	0.0364944
glyma.Wm82.gnm2.ann1.Glyma.10G062700.1	Glyma.10G062700	PF01485	PF00097	PF00651	0.0657781	0.107003	0.117756
glyma.Wm82.gnm2.ann1.Glyma.10G199900.1	Glyma.10G199900	PF07716	PF00319	PF10440	0.0453666	0.0474083	0.0979845
glyma.Wm82.gnm2.ann1.Glyma.10G199900.2	Glyma.10G199900	PF00319	PF07716	PF10440	0.0403892	0.0462591	0.103085
glyma.Wm82.gnm2.ann1.Glyma.10G092000.1	Glyma.10G092000	PF00782	PF00389	PF02800	0.0482554	0.0850917	0.128284
glyma.Wm82.gnm2.ann1.Glyma.10G062600.1	Glyma.10G062600	PF00501	PF00248	PF03129	0.0659855	0.164852	0.207056
glyma.Wm82.gnm2.ann1.Glyma.10G059700.1	Glyma.10G059700	PF12756	PF02892	PF12171	0.0778178	0.0868751	0.748602
glyma.Wm82.gnm2.ann1.Glyma.10G209300.3	Glyma.10G209300	PF17863	PF01656	PF02374	0.00134562	0.0332996	0.963633
glyma.Wm82.gnm2.ann1.Glyma.10G209300.1	Glyma.10G209300	PF17863	PF01656	PF02374	0.00134562	0.0332996	0.963633
glyma.Wm82.gnm2.ann1.Glyma.10G209300.2	Glyma.10G209300	PF17863	PF01656	PF02374	0.00134562	0.0332996	0.963633
glyma.Wm82.gnm2.ann1.Glyma.10G243200.1	Glyma.10G243200	PF00010	PF00004	PF08423	0.000823395	0.00119285	0.996639
glyma.Wm82.gnm2.ann1.Glyma.10G243200.2	Glyma.10G243200	PF00010	PF00004	PF08423	0.000850068	0.00156974	0.996316
glyma.Wm82.gnm2.ann1.Glyma.10G186100.1	Glyma.10G186100	PF00505	PF05047	PF00334	0.0260475	0.0297504	0.0840986
glyma.Wm82.gnm2.ann1.Glyma.10G248200.1	Glyma.10G248200	PF00462	PF00443	PF00076	0.021216	0.0258708	0.0265241
glyma.Wm82.gnm2.ann1.Glyma.10G179400.1	Glyma.10G179400	PF00155	PF15982	PF08392	0.0655951	0.12278	0.431173
glyma.Wm82.gnm2.ann1.Glyma.10G018900.1	Glyma.10G018900	PF02270	PF00010	PF13867	0.0348733	0.0579124	0.383102
glyma.Wm82.gnm2.ann1.Glyma.10G018900.2	Glyma.10G018900	PF05627	PF00505	PF05678	0.0756471	0.0769608	0.115954
glyma.Wm82.gnm2.ann1.Glyma.10G236900.1	Glyma.10G236900	PF08387	PF12937	PF00646	0.0123955	0.203084	0.780517
glyma.Wm82.gnm2.ann1.Glyma.10G236900.5	Glyma.10G236900	PF08387	PF12937	PF00646	0.0123955	0.203084	0.780517
glyma.Wm82.gnm2.ann1.Glyma.10G236900.2	Glyma.10G236900	PF08387	PF12937	PF00646	0.0224833	0.287299	0.686811
glyma.Wm82.gnm2.ann1.Glyma.10G236900.3	Glyma.10G236900	PF08387	PF12937	PF00646	0.0224833	0.287299	0.686811
glyma.Wm82.gnm2.ann1.Glyma.10G236900.4	Glyma.10G236900	PF08387	PF12937	PF00646	0.0224833	0.287299	0.686811
glyma.Wm82.gnm2.ann1.Glyma.10G258300.1	Glyma.10G258300	PF03478	PF08662	PF13088	0.12379	0.124772	0.356486
glyma.Wm82.gnm2.ann1.Glyma.10G258300.2	Glyma.10G258300	PF08662	PF13088	PF03478	0.0957922	0.18669	0.282372
glyma.Wm82.gnm2.ann1.Glyma.10G089100.1	Glyma.10G089100	PF03031	PF14244	PF01423	0.081796	0.118842	0.133735
glyma.Wm82.gnm2.ann1.Glyma.10G033100.2	Glyma.10G033100	PF02201	PF08766	PF03939	0.0555754	0.0639813	0.137885
glyma.Wm82.gnm2.ann1.Glyma.10G033100.1	Glyma.10G033100	PF02201	PF08766	PF03939	0.0555754	0.0639813	0.137885
glyma.Wm82.gnm2.ann1.Glyma.10G242400.1	Glyma.10G242400	PF00249	PF10545	PF00505	0.0576451	0.0673684	0.390149
glyma.Wm82.gnm2.ann1.Glyma.10G069500.1	Glyma.10G069500	PF00089	PF07714	PF00069	2.24248e-05	0.0443937	0.955487
glyma.Wm82.gnm2.ann1.Glyma.10G069500.2	Glyma.10G069500	PF00089	PF07714	PF00069	2.49365e-05	0.0395233	0.960375
glyma.Wm82.gnm2.ann1.Glyma.10G121300.1	Glyma.10G121300	PF00271	PF00270	PF04851	0.0874583	0.111427	0.180243
glyma.Wm82.gnm2.ann1.Glyma.10G106000.1	Glyma.10G106000	PF00472	PF05703	PF13178	0.00321214	0.0056845	0.986787
glyma.Wm82.gnm2.ann1.Glyma.10G233800.1	Glyma.10G233800	PF00024	PF00443	PF00856	0.0943895	0.128424	0.243121
glyma.Wm82.gnm2.ann1.Glyma.10G169900.1	Glyma.10G169900	PF00046	PF00010	PF05678	0.065586	0.102092	0.252253
glyma.Wm82.gnm2.ann1.Glyma.10G169900.2	Glyma.10G169900	PF00010	PF00046	PF05678	0.0587318	0.0809975	0.340187
glyma.Wm82.gnm2.ann1.Glyma.10G031000.1	Glyma.10G031000	PF10650	PF14383	PF14309	0.00499411	0.0620785	0.916456
glyma.Wm82.gnm2.ann1.Glyma.10G031000.2	Glyma.10G031000	PF10650	PF14383	PF14309	0.0053157	0.0679633	0.905923
glyma.Wm82.gnm2.ann1.Glyma.10G038100.1	Glyma.10G038100	PF00076	PF00168	PF05641	0.115126	0.136431	0.145863
glyma.Wm82.gnm2.ann1.Glyma.10G263200.1	Glyma.10G263200	PF00141	PF02469	PF01273	0.0970356	0.141089	0.193415
glyma.Wm82.gnm2.ann1.Glyma.10G074900.1	Glyma.10G074900	PF00097	PF00111	PF00462	0.0620502	0.0691797	0.343957
glyma.Wm82.gnm2.ann1.Glyma.10G228800.1	Glyma.10G228800	PF12937	PF00651	PF00646	0.0684087	0.136554	0.250367
glyma.Wm82.gnm2.ann1.Glyma.10G288800.1	Glyma.10G288800	PF00884	PF00128	PF00149	0.00033181	0.000456754	0.998699
glyma.Wm82.gnm2.ann1.Glyma.10G089800.1	Glyma.10G089800	PF12678	PF00097	PF13639	0.0309914	0.0670159	0.88977
glyma.Wm82.gnm2.ann1.Glyma.10G020200.1	Glyma.10G020200	PF00098	PF01844	PF12171	0.0658453	0.0906656	0.245447
glyma.Wm82.gnm2.ann1.Glyma.10G131700.1	Glyma.10G131700	PF00564	PF04059	PF00076	0.000506557	0.00447441	0.993694
glyma.Wm82.gnm2.ann1.Glyma.10G273200.1	Glyma.10G273200	PF00168	PF00754	PF03168	0.102651	0.144118	0.193898
glyma.Wm82.gnm2.ann1.Glyma.10G217500.1	Glyma.10G217500	PF14634	PF00097	PF13639	0.00564574	0.0843959	0.89852
glyma.Wm82.gnm2.ann1.Glyma.10G235100.1	Glyma.10G235100	PF00089	PF01565	PF00091	1.85923e-05	0.000148156	0.999796
glyma.Wm82.gnm2.ann1.Glyma.10G277200.1	Glyma.10G277200	PF00754	PF12708	PF00089	0.0630663	0.173853	0.25546
glyma.Wm82.gnm2.ann1.Glyma.10G145100.1	Glyma.10G145100	PF00005	PF04548	PF01926	0.0887535	0.0996787	0.10188
glyma.Wm82.gnm2.ann1.Glyma.10G145100.2	Glyma.10G145100	PF00005	PF04548	PF01926	0.0887535	0.0996787	0.10188
glyma.Wm82.gnm2.ann1.Glyma.10G145100.3	Glyma.10G145100	PF00005	PF04548	PF01926	0.0887535	0.0996787	0.10188
glyma.Wm82.gnm2.ann1.Glyma.10G145100.4	Glyma.10G145100	PF00005	PF04548	PF01926	0.0887535	0.0996787	0.10188
glyma.Wm82.gnm2.ann1.Glyma.10G075800.1	Glyma.10G075800	PF00857	PF13456	PF00646	0.140187	0.186111	0.232788
glyma.Wm82.gnm2.ann1.Glyma.10G010700.1	Glyma.10G010700	PF13532	PF14226	PF03171	0.000113989	0.0116497	0.988047
glyma.Wm82.gnm2.ann1.Glyma.10G015700.1	Glyma.10G015700	PF03939	PF01778	PF06886	0.089788	0.0974305	0.121186
glyma.Wm82.gnm2.ann1.Glyma.10G015000.1	Glyma.10G015000	PF00787	PF06839	PF05047	0.0598015	0.0626379	0.0711689
glyma.Wm82.gnm2.ann1.Glyma.10G255600.1	Glyma.10G255600	PF12937	PF08387	PF00646	0.110335	0.118721	0.604533
glyma.Wm82.gnm2.ann1.Glyma.10G255600.2	Glyma.10G255600	PF12937	PF08387	PF00646	0.110335	0.118721	0.604533
glyma.Wm82.gnm2.ann1.Glyma.10G149700.1	Glyma.10G149700	PF01556	PF00252	PF00347	0.0649078	0.263757	0.318994
glyma.Wm82.gnm2.ann1.Glyma.10G176600.1	Glyma.10G176600	PF08241	PF00891	PF08100	0.00012395	0.0665486	0.932276
glyma.Wm82.gnm2.ann1.Glyma.10G121800.1	Glyma.10G121800	PF00069	PF00134	PF02902	0.0648687	0.0768215	0.266718
glyma.Wm82.gnm2.ann1.Glyma.10G066500.1	Glyma.10G066500	PF07460	PF04935	PF01778	0.0646118	0.312143	0.418822
glyma.Wm82.gnm2.ann1.Glyma.10G018800.1	Glyma.10G018800	PF14634	PF13639	PF00097	0.0719076	0.209077	0.686194
glyma.Wm82.gnm2.ann1.Glyma.10G082700.1	Glyma.10G082700	PF01301	PF00135	PF00704	0.0428068	0.0435117	0.0594273
glyma.Wm82.gnm2.ann1.Glyma.10G159400.1	Glyma.10G159400	PF05236	PF12656	PF04927	0.00789781	0.0283608	0.932111
glyma.Wm82.gnm2.ann1.Glyma.10G015600.1	Glyma.10G015600	PF14368	PF00234	PF14547	0.0984155	0.203166	0.331454
glyma.Wm82.gnm2.ann1.Glyma.10G000500.1	Glyma.10G000500	PF13676	PF12796	PF00728	0.0635925	0.126314	0.163817
glyma.Wm82.gnm2.ann1.Glyma.10G174100.1	Glyma.10G174100	PF09430	PF03330	PF03168	0.000517704	0.00118634	0.996783
glyma.Wm82.gnm2.ann1.Glyma.10G298900.2	Glyma.10G298900	PF07651	PF02845	PF07524	0.0589938	0.0715685	0.301205
glyma.Wm82.gnm2.ann1.Glyma.10G298900.4	Glyma.10G298900	PF07651	PF02845	PF07524	0.0589938	0.0715685	0.301205
glyma.Wm82.gnm2.ann1.Glyma.10G298900.5	Glyma.10G298900	PF07651	PF02845	PF07524	0.0589938	0.0715685	0.301205
glyma.Wm82.gnm2.ann1.Glyma.10G298900.7	Glyma.10G298900	PF07651	PF02845	PF07524	0.0589938	0.0715685	0.301205
glyma.Wm82.gnm2.ann1.Glyma.10G298900.1	Glyma.10G298900	PF07651	PF02845	PF07524	0.0589938	0.0715685	0.301205
glyma.Wm82.gnm2.ann1.Glyma.10G298900.3	Glyma.10G298900	PF07651	PF02845	PF07524	0.0562095	0.0610092	0.378843
glyma.Wm82.gnm2.ann1.Glyma.10G298900.6	Glyma.10G298900	PF07651	PF02845	PF07524	0.0562095	0.0610092	0.378843
glyma.Wm82.gnm2.ann1.Glyma.10G272700.1	Glyma.10G272700	PF00564	PF00808	PF02845	0.0613466	0.063217	0.160454
glyma.Wm82.gnm2.ann1.Glyma.10G225700.1	Glyma.10G225700	PF08387	PF00646	PF11955	0.00894019	0.00930598	0.931882
glyma.Wm82.gnm2.ann1.Glyma.10G040800.1	Glyma.10G040800	PF03847	PF02037	PF16987	0.0562742	0.188273	0.206385
glyma.Wm82.gnm2.ann1.Glyma.10G221200.2	Glyma.10G221200	PF00303	PF00069	PF01636	0.000910353	0.0114296	0.985372
glyma.Wm82.gnm2.ann1.Glyma.10G221200.1	Glyma.10G221200	PF00303	PF00069	PF01636	0.000910353	0.0114296	0.985372
glyma.Wm82.gnm2.ann1.Glyma.10G221200.3	Glyma.10G221200	PF00303	PF00069	PF01636	0.000910353	0.0114296	0.985372
glyma.Wm82.gnm2.ann1.Glyma.10G221200.4	Glyma.10G221200	PF04428	PF00069	PF01636	0.00105879	0.00352453	0.986957
glyma.Wm82.gnm2.ann1.Glyma.10G061200.1	Glyma.10G061200	PF02617	PF00125	PF01248	0.115501	0.163567	0.207621
glyma.Wm82.gnm2.ann1.Glyma.10G118000.1	Glyma.10G118000	PF00651	PF13456	PF03936	0.0725426	0.108941	0.112136
glyma.Wm82.gnm2.ann1.Glyma.10G184200.1	Glyma.10G184200	PF13639	PF00097	PF00646	0.0723259	0.106119	0.144532
glyma.Wm82.gnm2.ann1.Glyma.10G015400.1	Glyma.10G015400	PF01212	PF00266	PF00155	0.0148866	0.025968	0.954301
glyma.Wm82.gnm2.ann1.Glyma.10G188500.1	Glyma.10G188500	PF01699	PF07228	PF02518	0.10728	0.207568	0.28314
glyma.Wm82.gnm2.ann1.Glyma.10G188500.3	Glyma.10G188500	PF00027	PF07885	PF01699	0.104383	0.118072	0.225387
glyma.Wm82.gnm2.ann1.Glyma.10G188500.2	Glyma.10G188500	PF00027	PF07885	PF01699	0.104383	0.118072	0.225387
glyma.Wm82.gnm2.ann1.Glyma.10G188500.5	Glyma.10G188500	PF00027	PF07885	PF01699	0.104383	0.118072	0.225387
glyma.Wm82.gnm2.ann1.Glyma.10G188500.7	Glyma.10G188500	PF00027	PF07885	PF01699	0.104383	0.118072	0.225387
glyma.Wm82.gnm2.ann1.Glyma.10G188500.4	Glyma.10G188500	PF00027	PF07885	PF01699	0.104383	0.118072	0.225387
glyma.Wm82.gnm2.ann1.Glyma.10G188500.6	Glyma.10G188500	PF00027	PF07885	PF01699	0.104383	0.118072	0.225386
glyma.Wm82.gnm2.ann1.Glyma.10G201600.1	Glyma.10G201600	PF00361	PF13906	PF00916	0.121313	0.252964	0.35503
glyma.Wm82.gnm2.ann1.Glyma.10G083100.1	Glyma.10G083100	PF12678	PF00097	PF13639	0.0474936	0.0653497	0.872341
glyma.Wm82.gnm2.ann1.Glyma.10G183800.1	Glyma.10G183800	PF00857	PF00576	PF02338	0.0515583	0.0576223	0.0599326
glyma.Wm82.gnm2.ann1.Glyma.10G183800.2	Glyma.10G183800	PF00635	PF00578	PF00190	0.0773598	0.106718	0.118143
glyma.Wm82.gnm2.ann1.Glyma.10G150800.1	Glyma.10G150800	PF00252	PF00327	PF17135	0.000149906	0.00142208	0.99792
glyma.Wm82.gnm2.ann1.Glyma.10G245900.2	Glyma.10G245900	PF12076	PF00168	PF03987	0.0447676	0.0615657	0.0809238
glyma.Wm82.gnm2.ann1.Glyma.10G245900.1	Glyma.10G245900	PF12076	PF00168	PF03987	0.0447676	0.0615657	0.0809238
glyma.Wm82.gnm2.ann1.Glyma.10G245900.3	Glyma.10G245900	PF12076	PF00168	PF03987	0.0447676	0.0615657	0.0809238
glyma.Wm82.gnm2.ann1.Glyma.10G267700.1	Glyma.10G267700	PF00892	PF13906	PF00361	0.114922	0.120313	0.283718
glyma.Wm82.gnm2.ann1.Glyma.10G010000.1	Glyma.10G010000	PF00080	PF00754	PF00089	0.0710637	0.116042	0.344488
glyma.Wm82.gnm2.ann1.Glyma.10G268600.1	Glyma.10G268600	PF13532	PF00856	PF13640	0.0866989	0.194425	0.484838
glyma.Wm82.gnm2.ann1.Glyma.10G268600.2	Glyma.10G268600	PF00856	PF13532	PF13640	0.090209	0.118422	0.618411
glyma.Wm82.gnm2.ann1.Glyma.10G268600.3	Glyma.10G268600	PF00856	PF13532	PF13640	0.0421489	0.0440795	0.793379
glyma.Wm82.gnm2.ann1.Glyma.10G119400.1	Glyma.10G119400	PF00092	PF01915	PF00082	0.000630203	0.00116715	0.994071
glyma.Wm82.gnm2.ann1.Glyma.10G245500.1	Glyma.10G245500	PF01485	PF01753	PF00856	0.0527841	0.0664695	0.105894
glyma.Wm82.gnm2.ann1.Glyma.10G037600.1	Glyma.10G037600	PF00439	PF00249	PF00505	0.0618859	0.107718	0.116302
glyma.Wm82.gnm2.ann1.Glyma.10G035600.1	Glyma.10G035600	PF01794	PF00892	PF03151	0.0808325	0.133856	0.471986
glyma.Wm82.gnm2.ann1.Glyma.10G002800.1	Glyma.10G002800	PF12796	PF14432	PF17177	0.0120188	0.13086	0.820657
glyma.Wm82.gnm2.ann1.Glyma.10G062400.1	Glyma.10G062400	PF00483	PF00808	PF15511	0.000608445	0.00087683	0.997902
glyma.Wm82.gnm2.ann1.Glyma.10G023000.1	Glyma.10G023000	PF10313	PF12894	PF08662	0.114796	0.133147	0.548354
glyma.Wm82.gnm2.ann1.Glyma.10G023000.2	Glyma.10G023000	PF12894	PF10313	PF08662	0.0967396	0.124889	0.452779
glyma.Wm82.gnm2.ann1.Glyma.10G244800.1	Glyma.10G244800	PF00234	PF14380	PF13947	0.0796499	0.222125	0.512419
glyma.Wm82.gnm2.ann1.Glyma.10G244800.2	Glyma.10G244800	PF13947	PF14368	PF00234	0.0636392	0.311196	0.398371
glyma.Wm82.gnm2.ann1.Glyma.10G030800.1	Glyma.10G030800	PF00999	PF06813	PF00909	0.0428512	0.0463713	0.73524
glyma.Wm82.gnm2.ann1.Glyma.10G079600.1	Glyma.10G079600	PF08423	PF00582	PF00271	0.0770497	0.0802097	0.1095
glyma.Wm82.gnm2.ann1.Glyma.10G189600.1	Glyma.10G189600	PF14703	PF00685	PF01553	0.0278862	0.0321104	0.0327478
glyma.Wm82.gnm2.ann1.Glyma.10G199500.1	Glyma.10G199500	PF10172	PF05678	PF13867	0.0497066	0.155608	0.261088
glyma.Wm82.gnm2.ann1.Glyma.10G291800.1	Glyma.10G291800	PF01494	PF07228	PF00481	3.56419e-05	0.0666105	0.933278
glyma.Wm82.gnm2.ann1.Glyma.10G032700.1	Glyma.10G032700	PF01794	PF00361	PF01578	0.117412	0.144027	0.438433
glyma.Wm82.gnm2.ann1.Glyma.10G165400.1	Glyma.10G165400	PF03024	PF14380	PF00024	0.148481	0.260898	0.445916
glyma.Wm82.gnm2.ann1.Glyma.10G184000.1	Glyma.10G184000	PF14244	PF01699	PF00361	0.0285154	0.0379876	0.0559479
glyma.Wm82.gnm2.ann1.Glyma.10G270700.1	Glyma.10G270700	PF13441	PF00234	PF00137	0.0751986	0.092462	0.426593
glyma.Wm82.gnm2.ann1.Glyma.10G193700.1	Glyma.10G193700	PF01699	PF14237	PF08510	0.0453483	0.117796	0.139387
glyma.Wm82.gnm2.ann1.Glyma.10G162400.1	Glyma.10G162400	PF00650	PF02902	PF03031	0.0734034	0.074266	0.210655
glyma.Wm82.gnm2.ann1.Glyma.10G162400.2	Glyma.10G162400	PF03031	PF00567	PF00650	0.0600467	0.0786894	0.120525
glyma.Wm82.gnm2.ann1.Glyma.10G162400.3	Glyma.10G162400	PF00650	PF02902	PF03031	0.0734034	0.074266	0.210655
glyma.Wm82.gnm2.ann1.Glyma.10G203900.1	Glyma.10G203900	PF01661	PF00814	PF00291	0.0384043	0.114097	0.49529
glyma.Wm82.gnm2.ann1.Glyma.10G172500.1	Glyma.10G172500	PF11331	PF08573	PF08790	0.0311606	0.0513507	0.633261
glyma.Wm82.gnm2.ann1.Glyma.10G172500.2	Glyma.10G172500	PF00505	PF13919	PF08729	0.0748668	0.117367	0.182881
glyma.Wm82.gnm2.ann1.Glyma.10G087300.1	Glyma.10G087300	PF02854	PF00170	PF07716	0.0505922	0.0541418	0.0582806
glyma.Wm82.gnm2.ann1.Glyma.10G062200.1	Glyma.10G062200	PF00501	PF00534	PF01467	0.0566851	0.164937	0.241968
glyma.Wm82.gnm2.ann1.Glyma.10G248400.1	Glyma.10G248400	PF00249	PF07714	PF00069	0.000248232	0.0164319	0.983157
glyma.Wm82.gnm2.ann1.Glyma.10G248400.2	Glyma.10G248400	PF00249	PF07714	PF00069	6.71935e-05	0.0214001	0.978473
glyma.Wm82.gnm2.ann1.Glyma.10G018500.1	Glyma.10G018500	PF17862	PF00244	PF00631	0.0310691	0.0691101	0.136162
glyma.Wm82.gnm2.ann1.Glyma.10G065500.1	Glyma.10G065500	PF01833	PF00026	PF04366	0.0962092	0.102484	0.482941
glyma.Wm82.gnm2.ann1.Glyma.10G232800.2	Glyma.10G232800	PF00089	PF07714	PF00069	4.31431e-06	0.00976251	0.990214
glyma.Wm82.gnm2.ann1.Glyma.10G232800.1	Glyma.10G232800	PF00089	PF07714	PF00069	4.31431e-06	0.00976251	0.990214
glyma.Wm82.gnm2.ann1.Glyma.10G232800.3	Glyma.10G232800	PF00454	PF07714	PF00069	6.85493e-06	0.0156782	0.984297
glyma.Wm82.gnm2.ann1.Glyma.10G232800.4	Glyma.10G232800	PF00454	PF07714	PF00069	6.85493e-06	0.0156782	0.984297
glyma.Wm82.gnm2.ann1.Glyma.10G029300.1	Glyma.10G029300	PF05236	PF13178	PF05703	4.31093e-05	0.000186512	0.999387
glyma.Wm82.gnm2.ann1.Glyma.10G024100.1	Glyma.10G024100	PF04536	PF13639	PF08378	0.102748	0.219337	0.352536
glyma.Wm82.gnm2.ann1.Glyma.10G165800.1	Glyma.10G165800	PF10545	PF12776	PF00249	0.00356975	0.00555527	0.988357
glyma.Wm82.gnm2.ann1.Glyma.10G206500.1	Glyma.10G206500	PF12776	PF10545	PF00249	0.00142752	0.0026811	0.993771
glyma.Wm82.gnm2.ann1.Glyma.10G179300.1	Glyma.10G179300	PF00031	PF07885	PF01105	0.0324212	0.0505385	0.0521824
glyma.Wm82.gnm2.ann1.Glyma.10G270600.1	Glyma.10G270600	PF01636	PF07714	PF00069	9.08647e-06	0.0238835	0.976077
glyma.Wm82.gnm2.ann1.Glyma.10G110500.1	Glyma.10G110500	PF10377	PF08172	PF12325	0.0348004	0.150504	0.529231
glyma.Wm82.gnm2.ann1.Glyma.10G173900.1	Glyma.10G173900	PF01753	PF05617	PF06839	0.0369087	0.0427636	0.110755
glyma.Wm82.gnm2.ann1.Glyma.10G217300.1	Glyma.10G217300	PF02463	PF01926	PF00005	0.00282867	0.0139603	0.979187
glyma.Wm82.gnm2.ann1.Glyma.10G286000.1	Glyma.10G286000	PF00307	PF02036	PF04182	0.0298363	0.0340655	0.165981
glyma.Wm82.gnm2.ann1.Glyma.10G123400.1	Glyma.10G123400	PF12169	PF14629	PF00004	0.0125097	0.0164919	0.926057
glyma.Wm82.gnm2.ann1.Glyma.10G123400.2	Glyma.10G123400	PF12169	PF14629	PF00004	0.0125097	0.0164919	0.926057
glyma.Wm82.gnm2.ann1.Glyma.10G123400.6	Glyma.10G123400	PF12169	PF14629	PF00004	0.0125097	0.0164919	0.926057
glyma.Wm82.gnm2.ann1.Glyma.10G123400.3	Glyma.10G123400	PF12169	PF14629	PF00004	0.00886381	0.0199438	0.930088
glyma.Wm82.gnm2.ann1.Glyma.10G123400.4	Glyma.10G123400	PF12169	PF14629	PF00004	0.00886381	0.0199438	0.930089
glyma.Wm82.gnm2.ann1.Glyma.10G123400.5	Glyma.10G123400	PF00931	PF14629	PF00004	0.0108845	0.0172179	0.936983
glyma.Wm82.gnm2.ann1.Glyma.10G095300.1	Glyma.10G095300	PF04851	PF00004	PF13086	0.142618	0.164008	0.459159
glyma.Wm82.gnm2.ann1.Glyma.10G255300.1	Glyma.10G255300	PF08627	PF00909	PF00999	0.126023	0.254999	0.275881
glyma.Wm82.gnm2.ann1.Glyma.10G255300.3	Glyma.10G255300	PF06813	PF00999	PF00909	0.131338	0.21883	0.219512
glyma.Wm82.gnm2.ann1.Glyma.10G255300.2	Glyma.10G255300	PF00361	PF00909	PF01061	0.0899882	0.11209	0.270246
glyma.Wm82.gnm2.ann1.Glyma.10G255300.4	Glyma.10G255300	PF00361	PF00909	PF01061	0.0899882	0.11209	0.270246
glyma.Wm82.gnm2.ann1.Glyma.10G179200.1	Glyma.10G179200	PF08450	PF00112	PF00089	0.0468176	0.0792268	0.376818
glyma.Wm82.gnm2.ann1.Glyma.10G052400.1	Glyma.10G052400	PF07885	PF01699	PF00361	0.0503725	0.0506607	0.061036
glyma.Wm82.gnm2.ann1.Glyma.10G192100.1	Glyma.10G192100	PF07744	PF00855	PF00076	0.0956315	0.103897	0.419988
glyma.Wm82.gnm2.ann1.Glyma.10G237800.1	Glyma.10G237800	PF00855	PF00787	PF00447	1.3473e-06	2.80393e-06	0.999991
glyma.Wm82.gnm2.ann1.Glyma.10G081900.1	Glyma.10G081900	PF01248	PF12717	PF12348	0.0367366	0.0560345	0.713785
glyma.Wm82.gnm2.ann1.Glyma.10G242200.1	Glyma.10G242200	PF02298	PF00098	PF06839	0.0518221	0.135063	0.222789
glyma.Wm82.gnm2.ann1.Glyma.10G242200.2	Glyma.10G242200	PF00024	PF00098	PF06839	0.0943317	0.111927	0.148487
glyma.Wm82.gnm2.ann1.Glyma.10G090600.1	Glyma.10G090600	PF02018	PF02837	PF00754	0.122258	0.163428	0.447768
glyma.Wm82.gnm2.ann1.Glyma.10G090600.2	Glyma.10G090600	PF02837	PF02018	PF00754	0.111397	0.177197	0.375565
glyma.Wm82.gnm2.ann1.Glyma.10G264900.1	Glyma.10G264900	PF02463	PF01926	PF00005	0.00949096	0.0198839	0.966697
glyma.Wm82.gnm2.ann1.Glyma.10G089500.1	Glyma.10G089500	PF05703	PF04043	PF00141	0.0514988	0.128977	0.206551
glyma.Wm82.gnm2.ann1.Glyma.10G126800.1	Glyma.10G126800	PF00685	PF05699	PF00665	0.0493437	0.0624708	0.136903
glyma.Wm82.gnm2.ann1.Glyma.10G221900.1	Glyma.10G221900	PF12656	PF09133	PF05678	0.0375608	0.0384344	0.048901
glyma.Wm82.gnm2.ann1.Glyma.10G256700.1	Glyma.10G256700	PF03460	PF00557	PF06574	0.0779616	0.110653	0.23164
glyma.Wm82.gnm2.ann1.Glyma.10G065700.1	Glyma.10G065700	PF03798	PF15982	PF01794	0.086024	0.141035	0.265517
glyma.Wm82.gnm2.ann1.Glyma.10G224900.3	Glyma.10G224900	PF00168	PF00646	PF01167	0.0213397	0.0367138	0.728394
glyma.Wm82.gnm2.ann1.Glyma.10G224900.1	Glyma.10G224900	PF00168	PF00646	PF01167	0.0213397	0.0367138	0.728394
glyma.Wm82.gnm2.ann1.Glyma.10G224900.2	Glyma.10G224900	PF00168	PF00646	PF01167	0.0213397	0.0367138	0.728394
glyma.Wm82.gnm2.ann1.Glyma.10G270800.1	Glyma.10G270800	PF03104	PF00534	PF00982	0.000257931	0.00902584	0.989503
glyma.Wm82.gnm2.ann1.Glyma.10G088800.1	Glyma.10G088800	PF14215	PF00168	PF03478	0.041566	0.0464775	0.0778869
glyma.Wm82.gnm2.ann1.Glyma.10G116600.1	Glyma.10G116600	PF00481	PF01823	PF01167	0.0997568	0.10649	0.196074
glyma.Wm82.gnm2.ann1.Glyma.10G116600.2	Glyma.10G116600	PF01167	PF00481	PF01823	0.0651246	0.0694088	0.235746
glyma.Wm82.gnm2.ann1.Glyma.10G128700.1	Glyma.10G128700	PF01494	PF00732	PF07992	0.1326	0.181588	0.489088
glyma.Wm82.gnm2.ann1.Glyma.10G215600.1	Glyma.10G215600	PF00135	PF05699	PF14244	0.0381593	0.0418242	0.0465838
glyma.Wm82.gnm2.ann1.Glyma.10G132500.1	Glyma.10G132500	PF05617	PF14368	PF00234	0.00320399	0.336971	0.648997
glyma.Wm82.gnm2.ann1.Glyma.10G238000.1	Glyma.10G238000	PF00097	PF13639	PF12796	0.103109	0.2072	0.439068
glyma.Wm82.gnm2.ann1.Glyma.10G105500.1	Glyma.10G105500	PF00155	PF00501	PF00190	0.026094	0.040758	0.0622965
glyma.Wm82.gnm2.ann1.Glyma.10G268900.1	Glyma.10G268900	PF14634	PF00097	PF13639	0.0180804	0.223891	0.737083
glyma.Wm82.gnm2.ann1.Glyma.10G252200.1	Glyma.10G252200	PF02453	PF01435	PF09402	0.0191223	0.0364159	0.827239
glyma.Wm82.gnm2.ann1.Glyma.10G047600.1	Glyma.10G047600	PF00892	PF01699	PF08627	0.111303	0.151287	0.416043
glyma.Wm82.gnm2.ann1.Glyma.10G028900.1	Glyma.10G028900	PF00582	PF00999	PF00916	0.160355	0.205541	0.251535
glyma.Wm82.gnm2.ann1.Glyma.10G144600.2	Glyma.10G144600	PF00454	PF07714	PF00069	3.41398e-06	0.0139114	0.986077
glyma.Wm82.gnm2.ann1.Glyma.10G144600.1	Glyma.10G144600	PF00454	PF07714	PF00069	3.41398e-06	0.0139114	0.986077
glyma.Wm82.gnm2.ann1.Glyma.10G099600.1	Glyma.10G099600	PF14380	PF00024	PF13947	0.19193	0.246132	0.269846
glyma.Wm82.gnm2.ann1.Glyma.10G288000.1	Glyma.10G288000	PF04696	PF10187	PF09745	0.0021372	0.00475879	0.986355
glyma.Wm82.gnm2.ann1.Glyma.10G108500.1	Glyma.10G108500	PF00097	PF00439	PF01485	0.0427459	0.054964	0.0918376
glyma.Wm82.gnm2.ann1.Glyma.10G076300.1	Glyma.10G076300	PF06916	PF00361	PF07885	0.0492971	0.0818547	0.150156
glyma.Wm82.gnm2.ann1.Glyma.10G290500.1	Glyma.10G290500	PF08387	PF12937	PF00646	0.0523325	0.238796	0.703804
glyma.Wm82.gnm2.ann1.Glyma.10G290500.2	Glyma.10G290500	PF08387	PF12937	PF00646	0.0356264	0.202161	0.757118
glyma.Wm82.gnm2.ann1.Glyma.10G226600.1	Glyma.10G226600	PF00903	PF04059	PF00076	0.00366808	0.0134097	0.967763
glyma.Wm82.gnm2.ann1.Glyma.10G226600.2	Glyma.10G226600	PF00903	PF04059	PF00076	0.00287299	0.0115928	0.972395
glyma.Wm82.gnm2.ann1.Glyma.10G226600.3	Glyma.10G226600	PF05627	PF00080	PF05678	0.0414354	0.0940969	0.260412
glyma.Wm82.gnm2.ann1.Glyma.10G250000.1	Glyma.10G250000	PF00251	PF12819	PF00026	0.21287	0.22555	0.329404
glyma.Wm82.gnm2.ann1.Glyma.10G230600.1	Glyma.10G230600	PF01106	PF01883	PF00403	0.000120091	0.000284575	0.999364
glyma.Wm82.gnm2.ann1.Glyma.10G121100.1	Glyma.10G121100	PF12678	PF00097	PF13639	0.0344525	0.0647004	0.879658
glyma.Wm82.gnm2.ann1.Glyma.10G016200.1	Glyma.10G016200	PF01180	PF00016	PF01645	0.084317	0.130287	0.205251
glyma.Wm82.gnm2.ann1.Glyma.10G016200.2	Glyma.10G016200	PF00464	PF01180	PF01645	0.111244	0.139559	0.407942
glyma.Wm82.gnm2.ann1.Glyma.10G285900.1	Glyma.10G285900	PF05699	PF13259	PF05678	0.0301284	0.0460972	0.0971705
glyma.Wm82.gnm2.ann1.Glyma.10G188600.1	Glyma.10G188600	PF15612	PF00443	PF12047	0.0635302	0.0765905	0.105847
glyma.Wm82.gnm2.ann1.Glyma.10G188600.2	Glyma.10G188600	PF05641	PF00168	PF12047	0.0553399	0.0771251	0.0923571
glyma.Wm82.gnm2.ann1.Glyma.10G237000.1	Glyma.10G237000	PF00542	PF00254	PF01471	0.10355	0.121563	0.215705
glyma.Wm82.gnm2.ann1.Glyma.10G238700.1	Glyma.10G238700	PF12937	PF08268	PF00646	0.0260144	0.0350263	0.906762
glyma.Wm82.gnm2.ann1.Glyma.10G238700.2	Glyma.10G238700	PF08268	PF12937	PF00646	0.0225347	0.0467481	0.902086
glyma.Wm82.gnm2.ann1.Glyma.10G067400.1	Glyma.10G067400	PF00454	PF07714	PF00069	8.29756e-05	0.0343953	0.965434
glyma.Wm82.gnm2.ann1.Glyma.10G067400.2	Glyma.10G067400	PF00454	PF07714	PF00069	8.29756e-05	0.0343953	0.965434
glyma.Wm82.gnm2.ann1.Glyma.10G067400.3	Glyma.10G067400	PF00125	PF07714	PF00069	2.18045e-05	0.0292388	0.970619
glyma.Wm82.gnm2.ann1.Glyma.10G210900.1	Glyma.10G210900	PF01435	PF04253	PF04389	0.000140326	0.00140192	0.997374
glyma.Wm82.gnm2.ann1.Glyma.10G210900.2	Glyma.10G210900	PF01435	PF04253	PF04389	0.000140326	0.00140192	0.997374
glyma.Wm82.gnm2.ann1.Glyma.10G210900.3	Glyma.10G210900	PF01435	PF04253	PF04389	0.00106367	0.00159276	0.991771
glyma.Wm82.gnm2.ann1.Glyma.10G041900.1	Glyma.10G041900	PF01323	PF00085	PF00462	8.53717e-05	0.000717777	0.998978
glyma.Wm82.gnm2.ann1.Glyma.10G041900.2	Glyma.10G041900	PF00578	PF00085	PF00462	0.00019779	0.00180218	0.997592
glyma.Wm82.gnm2.ann1.Glyma.10G273000.1	Glyma.10G273000	PF12776	PF10545	PF00249	0.00158048	0.00270638	0.99383
glyma.Wm82.gnm2.ann1.Glyma.10G234200.1	Glyma.10G234200	PF00892	PF00916	PF08627	0.0613875	0.18886	0.370292
glyma.Wm82.gnm2.ann1.Glyma.10G049400.1	Glyma.10G049400	PF03719	PF17135	PF00252	0.067888	0.297381	0.318407
glyma.Wm82.gnm2.ann1.Glyma.10G049400.2	Glyma.10G049400	PF00505	PF00631	PF05687	0.088767	0.0913413	0.266426
glyma.Wm82.gnm2.ann1.Glyma.10G290400.2	Glyma.10G290400	PF00903	PF04059	PF00076	0.000276061	0.00507822	0.993426
glyma.Wm82.gnm2.ann1.Glyma.10G290400.1	Glyma.10G290400	PF00903	PF04059	PF00076	0.000276061	0.00507822	0.993426
glyma.Wm82.gnm2.ann1.Glyma.10G290400.4	Glyma.10G290400	PF00903	PF04059	PF00076	0.000276061	0.00507822	0.993426
glyma.Wm82.gnm2.ann1.Glyma.10G290400.3	Glyma.10G290400	PF03108	PF04059	PF00076	0.000164074	0.015274	0.983581
glyma.Wm82.gnm2.ann1.Glyma.10G284600.1	Glyma.10G284600	PF11708	PF06991	PF00098	0.0200416	0.029888	0.853543
glyma.Wm82.gnm2.ann1.Glyma.10G217900.1	Glyma.10G217900	PF00909	PF00361	PF13906	0.0848697	0.181576	0.260129
glyma.Wm82.gnm2.ann1.Glyma.10G124200.1	Glyma.10G124200	PF00391	PF03810	PF00571	0.0468602	0.112066	0.605572
glyma.Wm82.gnm2.ann1.Glyma.10G124200.2	Glyma.10G124200	PF13625	PF00550	PF00571	0.0357182	0.042127	0.750839
glyma.Wm82.gnm2.ann1.Glyma.10G294300.1	Glyma.10G294300	PF07651	PF00307	PF01417	0.102377	0.175649	0.260403
glyma.Wm82.gnm2.ann1.Glyma.10G294300.2	Glyma.10G294300	PF02854	PF01417	PF00307	0.105875	0.199867	0.20775
glyma.Wm82.gnm2.ann1.Glyma.10G294300.3	Glyma.10G294300	PF02845	PF01417	PF09177	0.0956494	0.114637	0.121845
glyma.Wm82.gnm2.ann1.Glyma.10G187600.1	Glyma.10G187600	PF00849	PF00327	PF11976	0.0544691	0.055983	0.0590443
glyma.Wm82.gnm2.ann1.Glyma.10G087800.1	Glyma.10G087800	PF07727	PF07714	PF00069	2.67865e-05	0.0631832	0.936711
glyma.Wm82.gnm2.ann1.Glyma.10G037200.1	Glyma.10G037200	PF16953	PF15628	PF00650	0.000767374	0.00107244	0.995859
glyma.Wm82.gnm2.ann1.Glyma.10G037200.2	Glyma.10G037200	PF15628	PF03372	PF00650	0.00343976	0.0076069	0.97836
glyma.Wm82.gnm2.ann1.Glyma.10G053200.1	Glyma.10G053200	PF13259	PF05627	PF12656	0.0870363	0.100512	0.113572
glyma.Wm82.gnm2.ann1.Glyma.10G060200.1	Glyma.10G060200	PF00082	PF00682	PF01425	0.0651082	0.0753973	0.239988
glyma.Wm82.gnm2.ann1.Glyma.10G216900.1	Glyma.10G216900	PF01636	PF07714	PF00069	2.98153e-05	0.00653806	0.993429
glyma.Wm82.gnm2.ann1.Glyma.10G191700.1	Glyma.10G191700	PF00481	PF04043	PF00141	2.47737e-06	1.05423e-05	0.999983
glyma.Wm82.gnm2.ann1.Glyma.10G231300.1	Glyma.10G231300	PF00112	PF16561	PF00059	0.0403229	0.137107	0.58566
glyma.Wm82.gnm2.ann1.Glyma.10G036600.1	Glyma.10G036600	PF00447	PF00076	PF00135	0.0465652	0.0632451	0.179534
glyma.Wm82.gnm2.ann1.Glyma.10G190000.1	Glyma.10G190000	PF00234	PF14368	PF01753	0.114643	0.119696	0.120212
glyma.Wm82.gnm2.ann1.Glyma.10G228000.1	Glyma.10G228000	PF12937	PF00059	PF00646	0.0685626	0.0757293	0.290699
glyma.Wm82.gnm2.ann1.Glyma.10G223500.1	Glyma.10G223500	PF13639	PF01485	PF00097	0.184472	0.234018	0.239681
glyma.Wm82.gnm2.ann1.Glyma.10G223500.3	Glyma.10G223500	PF13639	PF00097	PF01485	0.171058	0.250731	0.267871
glyma.Wm82.gnm2.ann1.Glyma.10G223500.2	Glyma.10G223500	PF13639	PF01485	PF00097	0.145483	0.221385	0.252
glyma.Wm82.gnm2.ann1.Glyma.10G074200.1	Glyma.10G074200	PF00447	PF11976	PF01423	0.0315258	0.0349399	0.0479969
glyma.Wm82.gnm2.ann1.Glyma.10G126100.1	Glyma.10G126100	PF02469	PF14368	PF00234	0.0859117	0.127307	0.243475
glyma.Wm82.gnm2.ann1.Glyma.10G023100.1	Glyma.10G023100	PF01273	PF00135	PF02469	0.0595001	0.0766631	0.249207
glyma.Wm82.gnm2.ann1.Glyma.10G098700.1	Glyma.10G098700	PF00635	PF00447	PF03167	0.0514964	0.0683843	0.0827248
glyma.Wm82.gnm2.ann1.Glyma.10G126600.1	Glyma.10G126600	PF04194	PF00443	PF14309	0.0203654	0.0569096	0.810761
glyma.Wm82.gnm2.ann1.Glyma.10G126600.2	Glyma.10G126600	PF04194	PF00443	PF14309	0.0203654	0.0569096	0.810761
glyma.Wm82.gnm2.ann1.Glyma.10G143900.1	Glyma.10G143900	PF14111	PF01936	PF13976	0.099389	0.139237	0.203749
glyma.Wm82.gnm2.ann1.Glyma.10G151800.1	Glyma.10G151800	PF00407	PF09811	PF00254	0.0376834	0.045784	0.288154
glyma.Wm82.gnm2.ann1.Glyma.10G048200.1	Glyma.10G048200	PF07728	PF00004	PF05191	0.0845465	0.158426	0.618308
glyma.Wm82.gnm2.ann1.Glyma.10G084300.1	Glyma.10G084300	PF02854	PF13925	PF07744	0.0544676	0.0703118	0.18761
glyma.Wm82.gnm2.ann1.Glyma.10G084300.3	Glyma.10G084300	PF00855	PF00567	PF07744	0.0418478	0.0674679	0.370638
glyma.Wm82.gnm2.ann1.Glyma.10G084300.2	Glyma.10G084300	PF00168	PF01852	PF09402	0.0484222	0.0798051	0.136495
glyma.Wm82.gnm2.ann1.Glyma.10G211800.1	Glyma.10G211800	PF00646	PF05699	PF13966	0.0409992	0.0705601	0.0862946
glyma.Wm82.gnm2.ann1.Glyma.10G264200.1	Glyma.10G264200	PF02037	PF08698	PF15963	0.065336	0.0939655	0.0982206
glyma.Wm82.gnm2.ann1.Glyma.10G181400.1	Glyma.10G181400	PF01494	PF03016	PF05686	0.0216655	0.0333171	0.768907
glyma.Wm82.gnm2.ann1.Glyma.10G070900.1	Glyma.10G070900	PF01753	PF04438	PF08790	0.14195	0.219888	0.230383
glyma.Wm82.gnm2.ann1.Glyma.10G172300.1	Glyma.10G172300	PF00704	PF01094	PF02469	0.102871	0.154058	0.373494
glyma.Wm82.gnm2.ann1.Glyma.10G172300.2	Glyma.10G172300	PF01094	PF00704	PF00657	0.0808027	0.0889537	0.103103
glyma.Wm82.gnm2.ann1.Glyma.10G019600.1	Glyma.10G019600	PF05699	PF01466	PF00085	0.0876323	0.131959	0.135345
glyma.Wm82.gnm2.ann1.Glyma.10G152800.1	Glyma.10G152800	PF00134	PF13962	PF14547	0.0690278	0.145517	0.195738
glyma.Wm82.gnm2.ann1.Glyma.10G040500.1	Glyma.10G040500	PF01636	PF07714	PF00069	0.000169889	0.0347171	0.964933
glyma.Wm82.gnm2.ann1.Glyma.10G114300.1	Glyma.10G114300	PF17032	PF02892	PF00403	0.0340985	0.117969	0.570906
glyma.Wm82.gnm2.ann1.Glyma.10G121700.1	Glyma.10G121700	PF14372	PF03101	PF10551	0.0757558	0.0797487	0.613868
glyma.Wm82.gnm2.ann1.Glyma.10G271900.1	Glyma.10G271900	PF00454	PF07714	PF00069	1.48983e-05	0.0308454	0.969114
glyma.Wm82.gnm2.ann1.Glyma.10G092500.1	Glyma.10G092500	PF02889	PF00443	PF00027	0.0513096	0.0530672	0.0723719
glyma.Wm82.gnm2.ann1.Glyma.10G219600.1	Glyma.10G219600	PF10545	PF04601	PF12776	0.0760073	0.138873	0.157561
glyma.Wm82.gnm2.ann1.Glyma.10G074000.1	Glyma.10G074000	PF00137	PF00690	PF04419	0.128469	0.152782	0.156112
glyma.Wm82.gnm2.ann1.Glyma.10G275300.1	Glyma.10G275300	PF01883	PF00571	PF00403	0.00930234	0.0153292	0.931568
glyma.Wm82.gnm2.ann1.Glyma.10G275300.2	Glyma.10G275300	PF01883	PF00571	PF00403	0.017466	0.0259322	0.885408
glyma.Wm82.gnm2.ann1.Glyma.10G282600.1	Glyma.10G282600	PF10536	PF13456	PF13966	0.0609641	0.0948763	0.290072
glyma.Wm82.gnm2.ann1.Glyma.10G241300.1	Glyma.10G241300	PF00170	PF13891	PF00010	0.000486978	0.00261016	0.995776
glyma.Wm82.gnm2.ann1.Glyma.10G114700.1	Glyma.10G114700	PF13393	PF00588	PF01937	0.0358262	0.0455111	0.0815031
glyma.Wm82.gnm2.ann1.Glyma.10G101500.1	Glyma.10G101500	PF00188	PF00089	PF05678	0.0483237	0.0559376	0.149279
glyma.Wm82.gnm2.ann1.Glyma.10G252400.1	Glyma.10G252400	PF13867	PF02298	PF05678	0.0318145	0.0447562	0.0522551
glyma.Wm82.gnm2.ann1.Glyma.10G231700.1	Glyma.10G231700	PF08030	PF01578	PF01794	0.0159967	0.0343891	0.913591
glyma.Wm82.gnm2.ann1.Glyma.10G033600.1	Glyma.10G033600	PF02683	PF00892	PF03151	0.171298	0.267608	0.373408
glyma.Wm82.gnm2.ann1.Glyma.10G147000.1	Glyma.10G147000	PF00787	PF05920	PF00046	0.00417267	0.393687	0.581234
glyma.Wm82.gnm2.ann1.Glyma.10G147000.3	Glyma.10G147000	PF00249	PF05920	PF00046	0.00494048	0.43186	0.525706
glyma.Wm82.gnm2.ann1.Glyma.10G147000.2	Glyma.10G147000	PF00249	PF00046	PF05920	0.0112972	0.462471	0.502311
glyma.Wm82.gnm2.ann1.Glyma.10G142500.1	Glyma.10G142500	PF00254	PF02037	PF16561	0.0250237	0.266162	0.53889
glyma.Wm82.gnm2.ann1.Glyma.10G142500.2	Glyma.10G142500	PF00254	PF16561	PF02037	0.0259651	0.377921	0.42516
glyma.Wm82.gnm2.ann1.Glyma.10G142500.3	Glyma.10G142500	PF00254	PF16561	PF02037	0.0259651	0.377921	0.42516
glyma.Wm82.gnm2.ann1.Glyma.10G232000.1	Glyma.10G232000	PF00270	PF00582	PF00004	0.083781	0.0909136	0.105448
glyma.Wm82.gnm2.ann1.Glyma.10G036100.1	Glyma.10G036100	PF13532	PF14226	PF03171	8.73005e-05	0.000821519	0.999056
glyma.Wm82.gnm2.ann1.Glyma.10G232400.1	Glyma.10G232400	PF00137	PF01343	PF06916	0.0624981	0.0952618	0.306434
glyma.Wm82.gnm2.ann1.Glyma.10G232400.2	Glyma.10G232400	PF00137	PF01343	PF06916	0.0682874	0.113556	0.278115
glyma.Wm82.gnm2.ann1.Glyma.10G006000.1	Glyma.10G006000	PF13456	PF02453	PF00689	0.0673565	0.0738133	0.291878
glyma.Wm82.gnm2.ann1.Glyma.10G006000.2	Glyma.10G006000	PF13456	PF02453	PF00689	0.0404253	0.168997	0.31773
glyma.Wm82.gnm2.ann1.Glyma.10G209500.1	Glyma.10G209500	PF07727	PF07714	PF00069	0.00127009	0.106226	0.887225
glyma.Wm82.gnm2.ann1.Glyma.10G169300.1	Glyma.10G169300	PF08268	PF12937	PF00646	0.0300518	0.0874587	0.861416
glyma.Wm82.gnm2.ann1.Glyma.10G169300.2	Glyma.10G169300	PF18511	PF12937	PF00646	0.00546609	0.253084	0.733546
glyma.Wm82.gnm2.ann1.Glyma.10G169300.3	Glyma.10G169300	PF18511	PF12937	PF00646	0.00212562	0.346542	0.637621
glyma.Wm82.gnm2.ann1.Glyma.10G291100.1	Glyma.10G291100	PF17172	PF13417	PF13409	0.00264838	0.0278968	0.969341
glyma.Wm82.gnm2.ann1.Glyma.10G178600.1	Glyma.10G178600	PF12706	PF13649	PF08241	0.128246	0.13323	0.485127
glyma.Wm82.gnm2.ann1.Glyma.10G178600.2	Glyma.10G178600	PF13847	PF13649	PF08241	0.0715283	0.247113	0.574031
glyma.Wm82.gnm2.ann1.Glyma.10G095500.1	Glyma.10G095500	PF00497	PF07766	PF01553	2.56077e-05	0.000110069	0.999765
glyma.Wm82.gnm2.ann1.Glyma.10G095500.2	Glyma.10G095500	PF00650	PF00497	PF01553	4.7242e-05	0.000118583	0.999702
glyma.Wm82.gnm2.ann1.Glyma.10G247000.2	Glyma.10G247000	PF00109	PF00024	PF00856	0.05302	0.092926	0.186514
glyma.Wm82.gnm2.ann1.Glyma.10G247000.1	Glyma.10G247000	PF00109	PF00024	PF00856	0.05302	0.092926	0.186514
glyma.Wm82.gnm2.ann1.Glyma.10G247000.3	Glyma.10G247000	PF00109	PF00024	PF00856	0.05302	0.092926	0.186514
glyma.Wm82.gnm2.ann1.Glyma.10G095700.1	Glyma.10G095700	PF00109	PF00171	PF00294	0.0438922	0.0557234	0.0685212
glyma.Wm82.gnm2.ann1.Glyma.10G151600.1	Glyma.10G151600	PF00089	PF00059	PF00112	0.0934104	0.10225	0.117588
glyma.Wm82.gnm2.ann1.Glyma.10G077300.1	Glyma.10G077300	PF14634	PF13639	PF00097	0.16141	0.252169	0.38436
glyma.Wm82.gnm2.ann1.Glyma.10G267200.1	Glyma.10G267200	PF07728	PF00004	PF00006	0.00496867	0.0104369	0.959267
glyma.Wm82.gnm2.ann1.Glyma.10G030300.1	Glyma.10G030300	PF00501	PF00171	PF13456	0.0399459	0.0664227	0.108826
glyma.Wm82.gnm2.ann1.Glyma.10G161600.1	Glyma.10G161600	PF08585	PF00168	PF02357	0.0374736	0.18705	0.325439
glyma.Wm82.gnm2.ann1.Glyma.10G296100.1	Glyma.10G296100	PF00909	PF06813	PF01699	0.107908	0.118418	0.689055
glyma.Wm82.gnm2.ann1.Glyma.10G054700.1	Glyma.10G054700	PF12776	PF10545	PF00249	0.00206363	0.00209428	0.995206
glyma.Wm82.gnm2.ann1.Glyma.10G127700.1	Glyma.10G127700	PF00307	PF00564	PF00439	0.083846	0.101014	0.144949
glyma.Wm82.gnm2.ann1.Glyma.10G127700.2	Glyma.10G127700	PF06391	PF00439	PF00564	0.0770357	0.101214	0.220806
glyma.Wm82.gnm2.ann1.Glyma.10G192300.1	Glyma.10G192300	PF12656	PF09177	PF01471	0.0257449	0.108094	0.35739
glyma.Wm82.gnm2.ann1.Glyma.10G192300.2	Glyma.10G192300	PF12656	PF09177	PF01471	0.0257449	0.108094	0.35739
glyma.Wm82.gnm2.ann1.Glyma.10G192300.3	Glyma.10G192300	PF12656	PF09177	PF01471	0.0257449	0.108094	0.35739
glyma.Wm82.gnm2.ann1.Glyma.10G113100.1	Glyma.10G113100	PF00383	PF00462	PF00085	0.0564225	0.301832	0.587535
glyma.Wm82.gnm2.ann1.Glyma.10G113100.2	Glyma.10G113100	PF00462	PF00383	PF00085	0.114612	0.235861	0.580119
glyma.Wm82.gnm2.ann1.Glyma.10G205400.1	Glyma.10G205400	PF01476	PF03168	PF00135	0.0453509	0.05569	0.112782
glyma.Wm82.gnm2.ann1.Glyma.10G096700.1	Glyma.10G096700	PF00303	PF02902	PF10536	0.0572305	0.0913935	0.163822
glyma.Wm82.gnm2.ann1.Glyma.10G105800.1	Glyma.10G105800	PF03364	PF02201	PF02037	0.037937	0.107028	0.216725
glyma.Wm82.gnm2.ann1.Glyma.10G034400.1	Glyma.10G034400	PF00169	PF01926	PF00271	0.0499318	0.0611802	0.090432
glyma.Wm82.gnm2.ann1.Glyma.10G034400.2	Glyma.10G034400	PF16095	PF01926	PF00271	0.0523863	0.0629589	0.0693307
glyma.Wm82.gnm2.ann1.Glyma.10G089000.1	Glyma.10G089000	PF00155	PF07228	PF00107	0.0523588	0.100382	0.303475
glyma.Wm82.gnm2.ann1.Glyma.10G038900.1	Glyma.10G038900	PF10382	PF14111	PF00168	0.0348825	0.0702067	0.171407
glyma.Wm82.gnm2.ann1.Glyma.10G038900.2	Glyma.10G038900	PF04774	PF05678	PF05627	0.0548565	0.0674326	0.300108
glyma.Wm82.gnm2.ann1.Glyma.10G272900.1	Glyma.10G272900	PF00501	PF14111	PF13456	0.0340269	0.0370268	0.0535163
glyma.Wm82.gnm2.ann1.Glyma.10G180000.1	Glyma.10G180000	PF14560	PF04266	PF00168	0.0557949	0.122586	0.18882
glyma.Wm82.gnm2.ann1.Glyma.10G180000.2	Glyma.10G180000	PF11976	PF05239	PF14560	0.0611724	0.190959	0.283196
glyma.Wm82.gnm2.ann1.Glyma.10G178700.1	Glyma.10G178700	PF00170	PF07716	PF00631	0.0205821	0.0272352	0.93458
glyma.Wm82.gnm2.ann1.Glyma.10G024700.1	Glyma.10G024700	PF00327	PF00635	PF05047	0.0348139	0.0371477	0.040048
glyma.Wm82.gnm2.ann1.Glyma.10G200900.1	Glyma.10G200900	PF00249	PF10545	PF12776	0.00463387	0.0245901	0.969147
glyma.Wm82.gnm2.ann1.Glyma.10G275000.1	Glyma.10G275000	PF17780	PF07145	PF06003	0.0788358	0.102579	0.322652
glyma.Wm82.gnm2.ann1.Glyma.10G033000.1	Glyma.10G033000	PF10551	PF05699	PF13456	0.0319106	0.0857609	0.564308
glyma.Wm82.gnm2.ann1.Glyma.10G197900.1	Glyma.10G197900	PF00689	PF00690	PF00501	0.00129541	0.00645715	0.990107
glyma.Wm82.gnm2.ann1.Glyma.10G201000.1	Glyma.10G201000	PF00254	PF02874	PF00364	0.0050502	0.0051204	0.952022
glyma.Wm82.gnm2.ann1.Glyma.10G201000.2	Glyma.10G201000	PF00190	PF00391	PF00364	0.0106988	0.0122001	0.945326
glyma.Wm82.gnm2.ann1.Glyma.10G201000.3	Glyma.10G201000	PF00391	PF00198	PF00364	0.0740532	0.0955401	0.740206
glyma.Wm82.gnm2.ann1.Glyma.10G142200.2	Glyma.10G142200	PF10545	PF12776	PF00249	0.00123526	0.00194723	0.995721
glyma.Wm82.gnm2.ann1.Glyma.10G142200.1	Glyma.10G142200	PF10545	PF12776	PF00249	0.00123525	0.00194723	0.995721
glyma.Wm82.gnm2.ann1.Glyma.10G244700.1	Glyma.10G244700	PF00501	PF00171	PF05047	0.0219698	0.0500001	0.0627128
glyma.Wm82.gnm2.ann1.Glyma.10G077900.1	Glyma.10G077900	PF14364	PF05529	PF02453	0.06564	0.0943521	0.246545
glyma.Wm82.gnm2.ann1.Glyma.10G111000.1	Glyma.10G111000	PF05678	PF00364	PF00011	0.0366336	0.0512727	0.144456
glyma.Wm82.gnm2.ann1.Glyma.10G154200.1	Glyma.10G154200	PF00169	PF00004	PF00307	0.0768894	0.146795	0.198299
glyma.Wm82.gnm2.ann1.Glyma.10G211700.1	Glyma.10G211700	PF07885	PF00361	PF01578	0.0509726	0.133623	0.215615
glyma.Wm82.gnm2.ann1.Glyma.10G134300.1	Glyma.10G134300	PF00888	PF16679	PF07766	0.0662806	0.0762926	0.0959418
glyma.Wm82.gnm2.ann1.Glyma.10G069700.1	Glyma.10G069700	PF00249	PF05920	PF00046	0.000121564	0.0187426	0.981009
glyma.Wm82.gnm2.ann1.Glyma.10G088400.1	Glyma.10G088400	PF08627	PF00892	PF03151	0.00576921	0.0723869	0.920626
glyma.Wm82.gnm2.ann1.Glyma.10G207200.1	Glyma.10G207200	PF12776	PF00249	PF13259	0.00831872	0.0138736	0.941191
glyma.Wm82.gnm2.ann1.Glyma.10G207200.2	Glyma.10G207200	PF12776	PF00249	PF13259	0.00831872	0.0138736	0.941191
glyma.Wm82.gnm2.ann1.Glyma.10G207200.3	Glyma.10G207200	PF12776	PF00249	PF13259	0.00831872	0.0138736	0.941191
glyma.Wm82.gnm2.ann1.Glyma.10G207200.4	Glyma.10G207200	PF12776	PF00249	PF13259	0.00831872	0.0138736	0.941191
glyma.Wm82.gnm2.ann1.Glyma.10G171700.2	Glyma.10G171700	PF12894	PF08662	PF00646	0.125528	0.162303	0.191267
glyma.Wm82.gnm2.ann1.Glyma.10G171700.1	Glyma.10G171700	PF12894	PF08662	PF00646	0.125528	0.162303	0.191267
glyma.Wm82.gnm2.ann1.Glyma.10G158200.1	Glyma.10G158200	PF00098	PF03732	PF00307	0.112428	0.147835	0.297065
glyma.Wm82.gnm2.ann1.Glyma.10G059900.1	Glyma.10G059900	PF00004	PF00005	PF01926	0.141014	0.152022	0.172832
glyma.Wm82.gnm2.ann1.Glyma.10G059900.2	Glyma.10G059900	PF00004	PF00005	PF01926	0.141014	0.152022	0.172832
glyma.Wm82.gnm2.ann1.Glyma.10G255900.1	Glyma.10G255900	PF00704	PF00657	PF01094	0.0690179	0.0723906	0.135758
glyma.Wm82.gnm2.ann1.Glyma.10G120000.1	Glyma.10G120000	PF01336	PF12624	PF01423	0.00059048	0.00106531	0.995603
glyma.Wm82.gnm2.ann1.Glyma.10G087600.1	Glyma.10G087600	PF14372	PF01399	PF05699	0.08919	0.0990686	0.227166
glyma.Wm82.gnm2.ann1.Glyma.10G118700.1	Glyma.10G118700	PF14303	PF07716	PF02201	0.0716248	0.090689	0.0928275
glyma.Wm82.gnm2.ann1.Glyma.10G251900.1	Glyma.10G251900	PF13180	PF00498	PF11976	0.00723994	0.206627	0.773316
glyma.Wm82.gnm2.ann1.Glyma.10G251900.2	Glyma.10G251900	PF13180	PF00498	PF11976	0.00723994	0.206627	0.773316
glyma.Wm82.gnm2.ann1.Glyma.10G251900.3	Glyma.10G251900	PF14560	PF00498	PF11976	0.00711369	0.0533454	0.931484
glyma.Wm82.gnm2.ann1.Glyma.10G251900.4	Glyma.10G251900	PF14560	PF00498	PF11976	0.00711369	0.0533454	0.931484
glyma.Wm82.gnm2.ann1.Glyma.10G054000.1	Glyma.10G054000	PF00135	PF07884	PF08510	0.028955	0.0411732	0.0427948
glyma.Wm82.gnm2.ann1.Glyma.10G054000.2	Glyma.10G054000	PF07884	PF00135	PF08510	0.0389507	0.0492458	0.0574961
glyma.Wm82.gnm2.ann1.Glyma.10G242300.1	Glyma.10G242300	PF01636	PF07714	PF00069	0.000286423	0.0467038	0.952852
glyma.Wm82.gnm2.ann1.Glyma.10G242300.2	Glyma.10G242300	PF01636	PF07714	PF00069	0.00013162	0.0361282	0.963642
glyma.Wm82.gnm2.ann1.Glyma.10G056600.1	Glyma.10G056600	PF04266	PF01243	PF01624	0.0356593	0.037076	0.0501307
glyma.Wm82.gnm2.ann1.Glyma.10G285700.1	Glyma.10G285700	PF12171	PF03107	PF12756	0.148346	0.175396	0.211819
glyma.Wm82.gnm2.ann1.Glyma.10G285700.2	Glyma.10G285700	PF02892	PF12756	PF12171	0.162043	0.255018	0.538485
glyma.Wm82.gnm2.ann1.Glyma.10G285700.3	Glyma.10G285700	PF02892	PF12756	PF12171	0.068687	0.140914	0.762599
glyma.Wm82.gnm2.ann1.Glyma.10G285700.4	Glyma.10G285700	PF02892	PF12756	PF12171	0.0645529	0.133997	0.773019
glyma.Wm82.gnm2.ann1.Glyma.10G122400.1	Glyma.10G122400	PF00271	PF12680	PF08378	0.0528818	0.0637119	0.182287
glyma.Wm82.gnm2.ann1.Glyma.10G181100.1	Glyma.10G181100	PF00169	PF00097	PF12796	0.0804884	0.0969747	0.103667
glyma.Wm82.gnm2.ann1.Glyma.10G192200.1	Glyma.10G192200	PF12894	PF08662	PF00188	0.0635786	0.144663	0.23842
glyma.Wm82.gnm2.ann1.Glyma.10G235000.1	Glyma.10G235000	PF00024	PF14368	PF00234	0.133174	0.214447	0.472753
glyma.Wm82.gnm2.ann1.Glyma.10G165600.4	Glyma.10G165600	PF13243	PF03200	PF12215	0.0483997	0.104676	0.4758
glyma.Wm82.gnm2.ann1.Glyma.10G165600.2	Glyma.10G165600	PF13243	PF03200	PF12215	0.0483997	0.104676	0.4758
glyma.Wm82.gnm2.ann1.Glyma.10G165600.3	Glyma.10G165600	PF13243	PF03200	PF12215	0.0483997	0.104676	0.4758
glyma.Wm82.gnm2.ann1.Glyma.10G165600.5	Glyma.10G165600	PF13243	PF03200	PF12215	0.0483997	0.104676	0.4758
glyma.Wm82.gnm2.ann1.Glyma.10G165600.6	Glyma.10G165600	PF13243	PF03200	PF12215	0.0483997	0.104676	0.4758
glyma.Wm82.gnm2.ann1.Glyma.10G165600.1	Glyma.10G165600	PF13243	PF03200	PF12215	0.0483997	0.104676	0.4758
glyma.Wm82.gnm2.ann1.Glyma.10G165600.7	Glyma.10G165600	PF13243	PF03200	PF12215	0.0483997	0.104676	0.4758
glyma.Wm82.gnm2.ann1.Glyma.10G157500.1	Glyma.10G157500	PF00454	PF07714	PF00069	1.85959e-05	0.024455	0.975507
glyma.Wm82.gnm2.ann1.Glyma.10G106100.1	Glyma.10G106100	PF00685	PF10075	PF01399	0.0011477	0.00354807	0.986302
glyma.Wm82.gnm2.ann1.Glyma.10G252600.1	Glyma.10G252600	PF00188	PF00089	PF10276	0.0411305	0.0632179	0.0774791
glyma.Wm82.gnm2.ann1.Glyma.10G132000.1	Glyma.10G132000	PF00646	PF13966	PF00307	0.0435381	0.0529456	0.0746461
glyma.Wm82.gnm2.ann1.Glyma.10G253300.2	Glyma.10G253300	PF00089	PF07714	PF00069	4.79156e-06	0.00961476	0.990374
glyma.Wm82.gnm2.ann1.Glyma.10G253300.1	Glyma.10G253300	PF00089	PF07714	PF00069	4.79156e-06	0.00961476	0.990374
glyma.Wm82.gnm2.ann1.Glyma.10G288100.1	Glyma.10G288100	PF01833	PF00026	PF14543	0.00352243	0.403238	0.575789
glyma.Wm82.gnm2.ann1.Glyma.10G216700.1	Glyma.10G216700	PF01467	PF00174	PF02698	0.0950499	0.111901	0.125731
glyma.Wm82.gnm2.ann1.Glyma.10G216700.2	Glyma.10G216700	PF00347	PF00174	PF02698	0.0433023	0.101421	0.382208
glyma.Wm82.gnm2.ann1.Glyma.10G242100.1	Glyma.10G242100	PF08241	PF00497	PF03016	0.0427854	0.11684	0.397562
glyma.Wm82.gnm2.ann1.Glyma.10G283500.1	Glyma.10G283500	PF14222	PF00888	PF01399	0.086639	0.131741	0.173853
glyma.Wm82.gnm2.ann1.Glyma.10G246300.1	Glyma.10G246300	PF00027	PF07883	PF00190	0.00767507	0.0454714	0.932775
glyma.Wm82.gnm2.ann1.Glyma.10G049600.4	Glyma.10G049600	PF16561	PF08172	PF12325	0.0424665	0.236943	0.634948
glyma.Wm82.gnm2.ann1.Glyma.10G049600.2	Glyma.10G049600	PF16561	PF08172	PF12325	0.0424665	0.236943	0.634948
glyma.Wm82.gnm2.ann1.Glyma.10G049600.1	Glyma.10G049600	PF16561	PF08172	PF12325	0.0424665	0.236943	0.634948
glyma.Wm82.gnm2.ann1.Glyma.10G049600.5	Glyma.10G049600	PF16561	PF08172	PF12325	0.0424665	0.236943	0.634948
glyma.Wm82.gnm2.ann1.Glyma.10G049600.6	Glyma.10G049600	PF16561	PF08172	PF12325	0.0392358	0.229193	0.65335
glyma.Wm82.gnm2.ann1.Glyma.10G049600.3	Glyma.10G049600	PF16561	PF08172	PF12325	0.0392358	0.229193	0.65335
glyma.Wm82.gnm2.ann1.Glyma.10G131100.1	Glyma.10G131100	PF00249	PF10545	PF12776	0.0073376	0.0205684	0.970251
glyma.Wm82.gnm2.ann1.Glyma.10G185000.1	Glyma.10G185000	PF12214	PF07839	PF06886	0.0224664	0.172922	0.513396
glyma.Wm82.gnm2.ann1.Glyma.10G185000.2	Glyma.10G185000	PF12656	PF07839	PF06886	0.0259701	0.165646	0.498354
glyma.Wm82.gnm2.ann1.Glyma.10G185000.3	Glyma.10G185000	PF06886	PF00635	PF01105	0.0663818	0.0953211	0.137917
glyma.Wm82.gnm2.ann1.Glyma.10G185000.4	Glyma.10G185000	PF07839	PF12214	PF06886	0.0371376	0.0610852	0.813935
glyma.Wm82.gnm2.ann1.Glyma.10G213900.1	Glyma.10G213900	PF00622	PF00407	PF00117	0.0307693	0.306861	0.427082
glyma.Wm82.gnm2.ann1.Glyma.10G213900.2	Glyma.10G213900	PF00168	PF00117	PF00407	0.0819168	0.0890499	0.156058
glyma.Wm82.gnm2.ann1.Glyma.10G152200.1	Glyma.10G152200	PF01578	PF00175	PF01794	0.0054511	0.0138666	0.959393
glyma.Wm82.gnm2.ann1.Glyma.10G241400.1	Glyma.10G241400	PF02179	PF14379	PF00010	0.000355111	0.00807898	0.989794
glyma.Wm82.gnm2.ann1.Glyma.10G241400.3	Glyma.10G241400	PF02179	PF14379	PF00010	0.000355111	0.00807898	0.989794
glyma.Wm82.gnm2.ann1.Glyma.10G241400.2	Glyma.10G241400	PF02179	PF14379	PF00010	0.000451042	0.00887825	0.988737
glyma.Wm82.gnm2.ann1.Glyma.10G241400.4	Glyma.10G241400	PF00125	PF14379	PF00010	0.00050295	0.00874065	0.989398
glyma.Wm82.gnm2.ann1.Glyma.10G148400.1	Glyma.10G148400	PF00849	PF12680	PF02897	0.0576685	0.0643872	0.114655
glyma.Wm82.gnm2.ann1.Glyma.10G225200.1	Glyma.10G225200	PF00505	PF00249	PF10545	0.0496147	0.0585474	0.840549
glyma.Wm82.gnm2.ann1.Glyma.10G131200.1	Glyma.10G131200	PF03468	PF14111	PF05641	0.0569962	0.259837	0.300136
glyma.Wm82.gnm2.ann1.Glyma.10G296500.1	Glyma.10G296500	PF07524	PF02845	PF03914	0.0553185	0.0738248	0.0739313
glyma.Wm82.gnm2.ann1.Glyma.10G279600.1	Glyma.10G279600	PF00254	PF07883	PF00190	0.00187967	0.0909466	0.90426
glyma.Wm82.gnm2.ann1.Glyma.10G137300.1	Glyma.10G137300	PF00646	PF07727	PF14111	0.0361302	0.0382613	0.0404557
glyma.Wm82.gnm2.ann1.Glyma.10G227500.1	Glyma.10G227500	PF00010	PF00069	PF02201	0.15073	0.156094	0.200964
glyma.Wm82.gnm2.ann1.Glyma.10G277000.1	Glyma.10G277000	PF13259	PF13966	PF00249	0.0465149	0.0493566	0.614163
glyma.Wm82.gnm2.ann1.Glyma.10G287000.1	Glyma.10G287000	PF13456	PF00631	PF05699	0.0233911	0.0273768	0.0506722
glyma.Wm82.gnm2.ann1.Glyma.10G274600.2	Glyma.10G274600	PF00855	PF13919	PF00505	0.0259989	0.099063	0.831948
glyma.Wm82.gnm2.ann1.Glyma.10G274600.1	Glyma.10G274600	PF00855	PF13919	PF00505	0.0259989	0.099063	0.831948
glyma.Wm82.gnm2.ann1.Glyma.10G097600.1	Glyma.10G097600	PF03644	PF00150	PF02836	0.0942898	0.10147	0.110934
glyma.Wm82.gnm2.ann1.Glyma.10G158900.1	Glyma.10G158900	PF04774	PF09405	PF05627	0.183832	0.198273	0.211101
glyma.Wm82.gnm2.ann1.Glyma.10G125700.1	Glyma.10G125700	PF04059	PF00134	PF00615	0.0270146	0.0886644	0.669595
glyma.Wm82.gnm2.ann1.Glyma.10G176400.1	Glyma.10G176400	PF13180	PF00168	PF00011	9.8507e-05	0.000470107	0.998948
glyma.Wm82.gnm2.ann1.Glyma.10G157300.1	Glyma.10G157300	PF07766	PF01281	PF04280	0.00692899	0.0130327	0.929295
glyma.Wm82.gnm2.ann1.Glyma.10G273900.1	Glyma.10G273900	PF12656	PF00252	PF03719	0.130001	0.145788	0.332642
glyma.Wm82.gnm2.ann1.Glyma.10G049500.1	Glyma.10G049500	PF00089	PF00188	PF12999	0.0857906	0.14631	0.151386
glyma.Wm82.gnm2.ann1.Glyma.10G091600.1	Glyma.10G091600	PF07766	PF01145	PF00787	0.0686266	0.0903905	0.133999
glyma.Wm82.gnm2.ann1.Glyma.10G091600.2	Glyma.10G091600	PF02518	PF00787	PF07766	0.0722628	0.0876262	0.109394
glyma.Wm82.gnm2.ann1.Glyma.10G091600.3	Glyma.10G091600	PF02518	PF00787	PF07766	0.0701547	0.0772154	0.128512
glyma.Wm82.gnm2.ann1.Glyma.10G195000.1	Glyma.10G195000	PF03372	PF03031	PF00004	0.0289267	0.0336906	0.0397988
glyma.Wm82.gnm2.ann1.Glyma.10G151300.1	Glyma.10G151300	PF13456	PF00188	PF01775	0.0419626	0.0420275	0.0595557
glyma.Wm82.gnm2.ann1.Glyma.10G207300.1	Glyma.10G207300	PF12697	PF00326	PF00561	0.0585971	0.245949	0.297409
glyma.Wm82.gnm2.ann1.Glyma.10G123900.1	Glyma.10G123900	PF00246	PF00112	PF01541	0.0395493	0.103018	0.109968
glyma.Wm82.gnm2.ann1.Glyma.10G085900.1	Glyma.10G085900	PF00010	PF07716	PF00319	3.58524e-05	7.70957e-05	0.999821
glyma.Wm82.gnm2.ann1.Glyma.10G077700.1	Glyma.10G077700	PF05699	PF05678	PF17035	0.0614087	0.107793	0.191368
glyma.Wm82.gnm2.ann1.Glyma.10G253000.1	Glyma.10G253000	PF00089	PF07714	PF00069	2.3011e-05	0.0181816	0.981789
glyma.Wm82.gnm2.ann1.Glyma.10G025400.1	Glyma.10G025400	PF01814	PF02338	PF13902	0.0144251	0.0903502	0.8376
glyma.Wm82.gnm2.ann1.Glyma.10G138100.3	Glyma.10G138100	PF13570	PF00754	PF12708	0.0501657	0.0653657	0.523282
glyma.Wm82.gnm2.ann1.Glyma.10G138100.1	Glyma.10G138100	PF13570	PF00754	PF12708	0.0501657	0.0653657	0.523282
glyma.Wm82.gnm2.ann1.Glyma.10G138100.2	Glyma.10G138100	PF07732	PF12708	PF00622	0.0536609	0.0956823	0.112613
glyma.Wm82.gnm2.ann1.Glyma.10G138100.4	Glyma.10G138100	PF07732	PF12708	PF00622	0.0536609	0.0956823	0.112613
glyma.Wm82.gnm2.ann1.Glyma.10G282200.1	Glyma.10G282200	PF07992	PF08491	PF01494	0.000784386	0.0707176	0.927303
glyma.Wm82.gnm2.ann1.Glyma.10G282200.2	Glyma.10G282200	PF01592	PF00481	PF01494	0.12989	0.14806	0.174343
glyma.Wm82.gnm2.ann1.Glyma.10G226100.1	Glyma.10G226100	PF10551	PF00155	PF00266	0.0323149	0.254995	0.291192
glyma.Wm82.gnm2.ann1.Glyma.10G257600.1	Glyma.10G257600	PF14634	PF13639	PF00097	0.142657	0.307088	0.396155
glyma.Wm82.gnm2.ann1.Glyma.10G257600.2	Glyma.10G257600	PF14634	PF13639	PF00097	0.100911	0.33433	0.370432
glyma.Wm82.gnm2.ann1.Glyma.10G162100.1	Glyma.10G162100	PF07716	PF00170	PF00010	0.129511	0.202185	0.665086
glyma.Wm82.gnm2.ann1.Glyma.10G034000.1	Glyma.10G034000	PF02782	PF00082	PF00294	0.00042625	0.00164426	0.995204
glyma.Wm82.gnm2.ann1.Glyma.10G207600.1	Glyma.10G207600	PF00615	PF05699	PF01172	0.0571248	0.0792569	0.217281
glyma.Wm82.gnm2.ann1.Glyma.10G007800.1	Glyma.10G007800	PF00999	PF13664	PF00955	0.123989	0.152901	0.228995
glyma.Wm82.gnm2.ann1.Glyma.10G007800.2	Glyma.10G007800	PF00916	PF00689	PF02453	0.0788059	0.105283	0.246271
glyma.Wm82.gnm2.ann1.Glyma.10G152500.1	Glyma.10G152500	PF10313	PF03478	PF05057	0.07163	0.073469	0.105655
glyma.Wm82.gnm2.ann1.Glyma.10G152500.2	Glyma.10G152500	PF10313	PF03478	PF05057	0.07163	0.073469	0.105655
glyma.Wm82.gnm2.ann1.Glyma.10G152500.3	Glyma.10G152500	PF10313	PF03478	PF05057	0.07163	0.073469	0.105655
glyma.Wm82.gnm2.ann1.Glyma.10G093400.1	Glyma.10G093400	PF05529	PF02453	PF07885	0.0704956	0.07404	0.124272
glyma.Wm82.gnm2.ann1.Glyma.10G093400.2	Glyma.10G093400	PF06454	PF03798	PF07885	0.0895017	0.0961089	0.132675
glyma.Wm82.gnm2.ann1.Glyma.10G093400.3	Glyma.10G093400	PF13962	PF08510	PF07884	0.071317	0.0852568	0.221906
glyma.Wm82.gnm2.ann1.Glyma.10G093400.6	Glyma.10G093400	PF01061	PF08510	PF07884	0.068649	0.0696156	0.163221
glyma.Wm82.gnm2.ann1.Glyma.10G093400.4	Glyma.10G093400	PF08510	PF01061	PF07884	0.0551669	0.0860551	0.1505
glyma.Wm82.gnm2.ann1.Glyma.10G093400.5	Glyma.10G093400	PF08510	PF01061	PF07884	0.0551669	0.0860551	0.1505
glyma.Wm82.gnm2.ann1.Glyma.10G021400.1	Glyma.10G021400	PF00170	PF02845	PF07716	0.0835276	0.13369	0.175942
glyma.Wm82.gnm2.ann1.Glyma.10G141900.1	Glyma.10G141900	PF00636	PF01966	PF00888	0.0859236	0.124998	0.151577
glyma.Wm82.gnm2.ann1.Glyma.10G094700.1	Glyma.10G094700	PF01336	PF14111	PF08240	0.0673908	0.0677247	0.0835681
glyma.Wm82.gnm2.ann1.Glyma.10G082900.1	Glyma.10G082900	PF12999	PF13947	PF14380	0.0526619	0.30115	0.563876
glyma.Wm82.gnm2.ann1.Glyma.10G246800.1	Glyma.10G246800	PF14547	PF14368	PF00234	0.00214827	0.269812	0.724672
glyma.Wm82.gnm2.ann1.Glyma.10G222700.1	Glyma.10G222700	PF14111	PF14244	PF13966	0.0519103	0.0611792	0.0957409
glyma.Wm82.gnm2.ann1.Glyma.10G054600.1	Glyma.10G054600	PF00443	PF02037	PF16561	0.0112495	0.0196324	0.904708
glyma.Wm82.gnm2.ann1.Glyma.10G010800.3	Glyma.10G010800	PF03129	PF13378	PF00501	0.00020366	0.00053592	0.998639
glyma.Wm82.gnm2.ann1.Glyma.10G010800.1	Glyma.10G010800	PF03129	PF13378	PF00501	0.00020366	0.00053592	0.998639
glyma.Wm82.gnm2.ann1.Glyma.10G010800.2	Glyma.10G010800	PF03129	PF13378	PF00501	0.00020366	0.00053592	0.998639
glyma.Wm82.gnm2.ann1.Glyma.10G010800.4	Glyma.10G010800	PF03129	PF13378	PF00501	0.00020366	0.00053592	0.998639
glyma.Wm82.gnm2.ann1.Glyma.10G101200.1	Glyma.10G101200	PF13649	PF05686	PF08241	0.144638	0.20107	0.20427
glyma.Wm82.gnm2.ann1.Glyma.10G101200.2	Glyma.10G101200	PF13649	PF13847	PF08241	0.145553	0.157598	0.257338
glyma.Wm82.gnm2.ann1.Glyma.10G179000.1	Glyma.10G179000	PF00562	PF00189	PF01775	0.0418726	0.0977893	0.123668
glyma.Wm82.gnm2.ann1.Glyma.10G153800.11	Glyma.10G153800	PF00069	PF02201	PF00249	0.0177666	0.0705486	0.826481
glyma.Wm82.gnm2.ann1.Glyma.10G153800.2	Glyma.10G153800	PF00069	PF02201	PF00249	0.0177666	0.0705486	0.826481
glyma.Wm82.gnm2.ann1.Glyma.10G153800.3	Glyma.10G153800	PF00069	PF02201	PF00249	0.0177666	0.0705486	0.826481
glyma.Wm82.gnm2.ann1.Glyma.10G153800.4	Glyma.10G153800	PF00069	PF02201	PF00249	0.0177666	0.0705486	0.826481
glyma.Wm82.gnm2.ann1.Glyma.10G153800.1	Glyma.10G153800	PF00069	PF02201	PF00249	0.0177666	0.0705486	0.826481
glyma.Wm82.gnm2.ann1.Glyma.10G153800.5	Glyma.10G153800	PF00069	PF02201	PF00249	0.0177666	0.0705486	0.826481
glyma.Wm82.gnm2.ann1.Glyma.10G153800.13	Glyma.10G153800	PF00069	PF02201	PF00249	0.0105156	0.0452439	0.88148
glyma.Wm82.gnm2.ann1.Glyma.10G153800.14	Glyma.10G153800	PF00069	PF02201	PF00249	0.0105156	0.0452439	0.88148
glyma.Wm82.gnm2.ann1.Glyma.10G153800.15	Glyma.10G153800	PF00069	PF02201	PF00249	0.0105156	0.0452439	0.88148
glyma.Wm82.gnm2.ann1.Glyma.10G153800.16	Glyma.10G153800	PF00069	PF02201	PF00249	0.0105156	0.0452439	0.88148
glyma.Wm82.gnm2.ann1.Glyma.10G153800.17	Glyma.10G153800	PF00069	PF02201	PF00249	0.0105156	0.0452439	0.88148
glyma.Wm82.gnm2.ann1.Glyma.10G153800.6	Glyma.10G153800	PF00069	PF02201	PF00249	0.0145594	0.0462771	0.856434
glyma.Wm82.gnm2.ann1.Glyma.10G153800.7	Glyma.10G153800	PF00069	PF02201	PF00249	0.0145594	0.0462771	0.856434
glyma.Wm82.gnm2.ann1.Glyma.10G153800.8	Glyma.10G153800	PF00069	PF02201	PF00249	0.0145594	0.0462771	0.856434
glyma.Wm82.gnm2.ann1.Glyma.10G153800.9	Glyma.10G153800	PF00069	PF02201	PF00249	0.0145594	0.0462771	0.856434
glyma.Wm82.gnm2.ann1.Glyma.10G153800.10	Glyma.10G153800	PF00069	PF02201	PF00249	0.0145594	0.0462771	0.856434
glyma.Wm82.gnm2.ann1.Glyma.10G153800.12	Glyma.10G153800	PF00069	PF02201	PF00249	0.0145594	0.0462769	0.856435
glyma.Wm82.gnm2.ann1.Glyma.10G153800.18	Glyma.10G153800	PF00505	PF02201	PF00249	0.0104647	0.0355724	0.895973
glyma.Wm82.gnm2.ann1.Glyma.10G153800.19	Glyma.10G153800	PF00505	PF02201	PF00249	0.0104647	0.0355725	0.895972
glyma.Wm82.gnm2.ann1.Glyma.10G153800.20	Glyma.10G153800	PF00505	PF02201	PF00249	0.0104647	0.0355725	0.895972
glyma.Wm82.gnm2.ann1.Glyma.10G153800.21	Glyma.10G153800	PF00505	PF02201	PF00249	0.0104647	0.0355725	0.895972
glyma.Wm82.gnm2.ann1.Glyma.10G153800.22	Glyma.10G153800	PF00505	PF02201	PF00249	0.0104647	0.0355725	0.895972
glyma.Wm82.gnm2.ann1.Glyma.10G282400.1	Glyma.10G282400	PF11835	PF04059	PF00076	0.000318452	0.000614073	0.997644
glyma.Wm82.gnm2.ann1.Glyma.10G057300.1	Glyma.10G057300	PF09763	PF16528	PF00168	0.0667592	0.106668	0.146078
glyma.Wm82.gnm2.ann1.Glyma.10G054900.1	Glyma.10G054900	PF02769	PF00117	PF00141	0.0582714	0.0612241	0.0662228
glyma.Wm82.gnm2.ann1.Glyma.10G054900.2	Glyma.10G054900	PF00117	PF00891	PF13649	0.0616528	0.0755541	0.0959704
glyma.Wm82.gnm2.ann1.Glyma.10G121000.1	Glyma.10G121000	PF05617	PF14368	PF00234	0.000759655	0.378288	0.619439
glyma.Wm82.gnm2.ann1.Glyma.10G049300.1	Glyma.10G049300	PF00307	PF00168	PF14215	0.0731891	0.102523	0.130443
glyma.Wm82.gnm2.ann1.Glyma.10G049300.2	Glyma.10G049300	PF00307	PF00168	PF14215	0.0731891	0.102523	0.130443
glyma.Wm82.gnm2.ann1.Glyma.10G274300.1	Glyma.10G274300	PF12171	PF00505	PF12756	0.104452	0.141748	0.146934
glyma.Wm82.gnm2.ann1.Glyma.10G222300.1	Glyma.10G222300	PF05627	PF01775	PF00076	0.137686	0.150097	0.247313
glyma.Wm82.gnm2.ann1.Glyma.10G154700.1	Glyma.10G154700	PF00271	PF00270	PF16575	0.112164	0.140856	0.157253
glyma.Wm82.gnm2.ann1.Glyma.10G177200.1	Glyma.10G177200	PF02771	PF00933	PF14237	0.0364336	0.0685352	0.104216
glyma.Wm82.gnm2.ann1.Glyma.10G162500.1	Glyma.10G162500	PF14432	PF17874	PF17177	0.00224418	0.0440443	0.943455
glyma.Wm82.gnm2.ann1.Glyma.10G212500.1	Glyma.10G212500	PF00754	PF00704	PF01433	0.0853321	0.0877823	0.0883568
glyma.Wm82.gnm2.ann1.Glyma.10G212500.2	Glyma.10G212500	PF00704	PF00326	PF00561	0.133219	0.180416	0.181643
glyma.Wm82.gnm2.ann1.Glyma.10G114000.1	Glyma.10G114000	PF02893	PF16884	PF00171	0.0419133	0.0923035	0.12542
glyma.Wm82.gnm2.ann1.Glyma.10G039600.1	Glyma.10G039600	PF14244	PF14111	PF00098	0.0612364	0.0663307	0.102053
glyma.Wm82.gnm2.ann1.Glyma.10G223900.1	Glyma.10G223900	PF01909	PF03914	PF03828	0.113876	0.189039	0.25111
glyma.Wm82.gnm2.ann1.Glyma.10G099300.1	Glyma.10G099300	PF14111	PF10551	PF13976	0.0730757	0.0948838	0.298275
glyma.Wm82.gnm2.ann1.Glyma.10G063800.1	Glyma.10G063800	PF01556	PF00622	PF00254	0.000890701	0.00140039	0.997195
glyma.Wm82.gnm2.ann1.Glyma.10G266400.1	Glyma.10G266400	PF16953	PF13679	PF00307	0.0802447	0.0993094	0.0993482
glyma.Wm82.gnm2.ann1.Glyma.10G266400.2	Glyma.10G266400	PF16953	PF04675	PF00730	0.106197	0.144559	0.407291
glyma.Wm82.gnm2.ann1.Glyma.10G297600.1	Glyma.10G297600	PF14547	PF14368	PF00234	0.0147135	0.40268	0.578604
glyma.Wm82.gnm2.ann1.Glyma.10G249700.1	Glyma.10G249700	PF12706	PF00856	PF00501	8.47175e-05	0.000102958	0.999414
glyma.Wm82.gnm2.ann1.Glyma.10G000300.1	Glyma.10G000300	PF00883	PF00673	PF00144	0.0218877	0.0228795	0.733116
glyma.Wm82.gnm2.ann1.Glyma.10G123800.1	Glyma.10G123800	PF13962	PF00999	PF00955	0.0653472	0.0848324	0.373732
glyma.Wm82.gnm2.ann1.Glyma.10G161300.1	Glyma.10G161300	PF07647	PF10545	PF00249	0.00902665	0.0216849	0.953306
glyma.Wm82.gnm2.ann1.Glyma.10G221800.1	Glyma.10G221800	PF07651	PF00010	PF01417	0.0711546	0.0854484	0.102971
glyma.Wm82.gnm2.ann1.Glyma.10G145900.1	Glyma.10G145900	PF00254	PF02357	PF00407	0.0655613	0.0677897	0.575928
glyma.Wm82.gnm2.ann1.Glyma.10G258100.1	Glyma.10G258100	PF13456	PF00501	PF13966	0.0427342	0.123981	0.233211
glyma.Wm82.gnm2.ann1.Glyma.10G064600.1	Glyma.10G064600	PF00249	PF07714	PF00069	1.3292e-05	0.00993712	0.99
glyma.Wm82.gnm2.ann1.Glyma.10G064600.2	Glyma.10G064600	PF00249	PF07714	PF00069	1.66719e-05	0.0152859	0.984664
glyma.Wm82.gnm2.ann1.Glyma.10G064600.3	Glyma.10G064600	PF00249	PF07714	PF00069	2.12394e-05	0.0179913	0.98195
glyma.Wm82.gnm2.ann1.Glyma.10G064600.4	Glyma.10G064600	PF00249	PF07714	PF00069	2.12394e-05	0.0179913	0.98195
glyma.Wm82.gnm2.ann1.Glyma.10G229500.1	Glyma.10G229500	PF08387	PF12937	PF00646	0.00458627	0.101289	0.886928
glyma.Wm82.gnm2.ann1.Glyma.10G035100.1	Glyma.10G035100	PF12931	PF00134	PF07651	0.0477455	0.105527	0.224051
glyma.Wm82.gnm2.ann1.Glyma.10G181200.1	Glyma.10G181200	PF00069	PF03732	PF00249	0.0821672	0.0955379	0.117503
glyma.Wm82.gnm2.ann1.Glyma.10G260700.1	Glyma.10G260700	PF14547	PF00234	PF00141	0.0516222	0.0783471	0.145177
glyma.Wm82.gnm2.ann1.Glyma.10G260700.4	Glyma.10G260700	PF14368	PF00141	PF00234	0.0885787	0.0924836	0.119425
glyma.Wm82.gnm2.ann1.Glyma.10G260700.5	Glyma.10G260700	PF14368	PF00141	PF00234	0.0885787	0.0924836	0.119425
glyma.Wm82.gnm2.ann1.Glyma.10G260700.3	Glyma.10G260700	PF14368	PF00141	PF00234	0.0850263	0.108307	0.121674
glyma.Wm82.gnm2.ann1.Glyma.10G260700.2	Glyma.10G260700	PF14368	PF00141	PF00234	0.0758972	0.0979614	0.106653
glyma.Wm82.gnm2.ann1.Glyma.10G124300.1	Glyma.10G124300	PF02889	PF07524	PF00249	0.0401179	0.0457193	0.078455
glyma.Wm82.gnm2.ann1.Glyma.10G124300.2	Glyma.10G124300	PF02889	PF07524	PF00249	0.0401179	0.0457193	0.078455
glyma.Wm82.gnm2.ann1.Glyma.10G225500.1	Glyma.10G225500	PF04675	PF18137	PF04424	0.0515994	0.0634479	0.127244
glyma.Wm82.gnm2.ann1.Glyma.10G068300.1	Glyma.10G068300	PF14279	PF16278	PF01541	0.0691225	0.0881454	0.0977127
glyma.Wm82.gnm2.ann1.Glyma.10G286500.1	Glyma.10G286500	PF01370	PF00561	PF00685	0.0388942	0.0428475	0.23295
glyma.Wm82.gnm2.ann1.Glyma.10G286500.2	Glyma.10G286500	PF01370	PF00561	PF00685	0.0388942	0.0428475	0.23295
glyma.Wm82.gnm2.ann1.Glyma.10G204500.1	Glyma.10G204500	PF00155	PF13409	PF00134	0.0428584	0.0523116	0.0805538
glyma.Wm82.gnm2.ann1.Glyma.10G128300.1	Glyma.10G128300	PF07716	PF00170	PF12325	0.0625592	0.0650497	0.763031
glyma.Wm82.gnm2.ann1.Glyma.10G261100.2	Glyma.10G261100	PF14379	PF00170	PF00010	0.00141978	0.00189931	0.993062
glyma.Wm82.gnm2.ann1.Glyma.10G261100.1	Glyma.10G261100	PF14379	PF00170	PF00010	0.00141978	0.00189931	0.993062
glyma.Wm82.gnm2.ann1.Glyma.10G261100.3	Glyma.10G261100	PF07716	PF00170	PF00010	0.00210716	0.00923975	0.969518
glyma.Wm82.gnm2.ann1.Glyma.10G193900.1	Glyma.10G193900	PF00892	PF04893	PF08510	0.0539335	0.0799781	0.479319
glyma.Wm82.gnm2.ann1.Glyma.10G250900.1	Glyma.10G250900	PF02453	PF06916	PF00690	0.0567138	0.0690085	0.0947475
glyma.Wm82.gnm2.ann1.Glyma.10G232300.2	Glyma.10G232300	PF07744	PF11926	PF03031	0.0606335	0.0864179	0.1183
glyma.Wm82.gnm2.ann1.Glyma.10G232300.1	Glyma.10G232300	PF07744	PF11926	PF03031	0.0606335	0.0864179	0.1183
glyma.Wm82.gnm2.ann1.Glyma.10G267400.1	Glyma.10G267400	PF13906	PF00999	PF00361	0.100411	0.105713	0.288067
glyma.Wm82.gnm2.ann1.Glyma.10G153600.1	Glyma.10G153600	PF05047	PF01248	PF05486	0.0421095	0.0429109	0.049109
glyma.Wm82.gnm2.ann1.Glyma.10G153600.2	Glyma.10G153600	PF05699	PF00168	PF07727	0.0238237	0.032371	0.0797973
glyma.Wm82.gnm2.ann1.Glyma.10G061500.1	Glyma.10G061500	PF07885	PF00361	PF00487	0.0524584	0.0543448	0.0798251
glyma.Wm82.gnm2.ann1.Glyma.10G283100.1	Glyma.10G283100	PF00076	PF00137	PF14237	0.0533083	0.0548559	0.0646887
glyma.Wm82.gnm2.ann1.Glyma.10G283100.2	Glyma.10G283100	PF00307	PF03847	PF04043	0.0802687	0.135236	0.203041
glyma.Wm82.gnm2.ann1.Glyma.10G289300.1	Glyma.10G289300	PF00089	PF05617	PF00176	0.0317598	0.0373611	0.0380276
glyma.Wm82.gnm2.ann1.Glyma.10G058600.1	Glyma.10G058600	PF11976	PF01336	PF04997	0.0630132	0.0885429	0.0906978
glyma.Wm82.gnm2.ann1.Glyma.10G058600.2	Glyma.10G058600	PF00856	PF01336	PF14279	0.0507797	0.0608507	0.157337
glyma.Wm82.gnm2.ann1.Glyma.10G282800.1	Glyma.10G282800	PF00188	PF05627	PF05678	0.0492955	0.0537085	0.0726231
glyma.Wm82.gnm2.ann1.Glyma.10G020000.1	Glyma.10G020000	PF00916	PF01699	PF03522	0.104607	0.108498	0.234541
glyma.Wm82.gnm2.ann1.Glyma.10G081000.1	Glyma.10G081000	PF00112	PF00089	PF00171	0.0426055	0.0568051	0.112526
glyma.Wm82.gnm2.ann1.Glyma.10G039300.1	Glyma.10G039300	PF02114	PF14111	PF04970	0.046543	0.0585256	0.0633593
glyma.Wm82.gnm2.ann1.Glyma.10G039300.2	Glyma.10G039300	PF00650	PF14111	PF03876	0.0645637	0.118696	0.135571
glyma.Wm82.gnm2.ann1.Glyma.10G286800.1	Glyma.10G286800	PF00169	PF00635	PF02893	5.36002e-05	0.000103611	0.999768
glyma.Wm82.gnm2.ann1.Glyma.10G267800.1	Glyma.10G267800	PF00999	PF13906	PF00361	0.122533	0.148417	0.215863
glyma.Wm82.gnm2.ann1.Glyma.10G184600.1	Glyma.10G184600	PF05899	PF08240	PF00364	0.0477952	0.0540357	0.249019
glyma.Wm82.gnm2.ann1.Glyma.10G097700.1	Glyma.10G097700	PF05678	PF01521	PF00024	0.0402602	0.114418	0.168475
glyma.Wm82.gnm2.ann1.Glyma.10G040200.1	Glyma.10G040200	PF00171	PF01248	PF00198	0.0409336	0.0422435	0.0503686
glyma.Wm82.gnm2.ann1.Glyma.10G058500.1	Glyma.10G058500	PF03467	PF04059	PF00076	0.000976241	0.00658342	0.990442
glyma.Wm82.gnm2.ann1.Glyma.10G232700.1	Glyma.10G232700	PF14372	PF05699	PF07727	0.0754235	0.090752	0.171257
glyma.Wm82.gnm2.ann1.Glyma.10G161800.1	Glyma.10G161800	PF00361	PF03798	PF07885	0.0617857	0.0741208	0.106731
glyma.Wm82.gnm2.ann1.Glyma.10G127200.1	Glyma.10G127200	PF00447	PF16282	PF00855	0.0546564	0.180703	0.580999
glyma.Wm82.gnm2.ann1.Glyma.10G226900.1	Glyma.10G226900	PF00168	PF12894	PF08662	0.0857833	0.0888587	0.089092
glyma.Wm82.gnm2.ann1.Glyma.10G226900.2	Glyma.10G226900	PF08646	PF12894	PF08662	0.0544874	0.128176	0.144796
glyma.Wm82.gnm2.ann1.Glyma.10G226900.3	Glyma.10G226900	PF08662	PF12894	PF08646	0.0635899	0.0696424	0.0697999
glyma.Wm82.gnm2.ann1.Glyma.10G105000.1	Glyma.10G105000	PF12776	PF02201	PF14111	0.067667	0.0748962	0.311196
glyma.Wm82.gnm2.ann1.Glyma.10G104100.1	Glyma.10G104100	PF01565	PF01823	PF12215	0.0407926	0.0414578	0.202088
glyma.Wm82.gnm2.ann1.Glyma.10G104100.2	Glyma.10G104100	PF03460	PF16035	PF10469	0.0579236	0.106329	0.141252
glyma.Wm82.gnm2.ann1.Glyma.10G145800.1	Glyma.10G145800	PF00407	PF00168	PF05641	0.0567383	0.111083	0.42479
glyma.Wm82.gnm2.ann1.Glyma.10G163600.1	Glyma.10G163600	PF02892	PF03108	PF14432	0.05607	0.154125	0.307654
glyma.Wm82.gnm2.ann1.Glyma.10G163600.2	Glyma.10G163600	PF02892	PF03108	PF14432	0.05607	0.154125	0.307654
glyma.Wm82.gnm2.ann1.Glyma.10G163600.3	Glyma.10G163600	PF02892	PF03108	PF14432	0.05607	0.154125	0.307654
glyma.Wm82.gnm2.ann1.Glyma.10G107700.1	Glyma.10G107700	PF00403	PF00689	PF00690	0.00400295	0.211072	0.774354
glyma.Wm82.gnm2.ann1.Glyma.10G208000.1	Glyma.10G208000	PF13966	PF17032	PF01844	0.12952	0.183725	0.208039
glyma.Wm82.gnm2.ann1.Glyma.10G019800.1	Glyma.10G019800	PF09350	PF00472	PF05008	0.0420654	0.0807533	0.0899881
glyma.Wm82.gnm2.ann1.Glyma.10G156500.1	Glyma.10G156500	PF14634	PF00097	PF13639	0.0180533	0.117227	0.850884
glyma.Wm82.gnm2.ann1.Glyma.10G010300.1	Glyma.10G010300	PF12776	PF10545	PF00249	0.00426267	0.00623492	0.987432
glyma.Wm82.gnm2.ann1.Glyma.10G075400.1	Glyma.10G075400	PF01061	PF01699	PF13962	0.0961494	0.104776	0.187715
glyma.Wm82.gnm2.ann1.Glyma.10G166500.1	Glyma.10G166500	PF00615	PF00567	PF17958	0.000295575	0.00039918	0.996514
glyma.Wm82.gnm2.ann1.Glyma.10G278000.1	Glyma.10G278000	PF14360	PF10520	PF00487	0.0038386	0.0215913	0.973792
glyma.Wm82.gnm2.ann1.Glyma.10G278000.2	Glyma.10G278000	PF14360	PF10520	PF00487	0.0038386	0.0215913	0.973792
glyma.Wm82.gnm2.ann1.Glyma.10G173100.1	Glyma.10G173100	PF10502	PF00127	PF02298	0.000442282	0.000724483	0.99753
glyma.Wm82.gnm2.ann1.Glyma.10G173100.2	Glyma.10G173100	PF02221	PF00127	PF02298	2.59e-05	0.000219753	0.999594
glyma.Wm82.gnm2.ann1.Glyma.10G187000.1	Glyma.10G187000	PF00182	PF01464	PF03732	0.0297723	0.0450136	0.205118
glyma.Wm82.gnm2.ann1.Glyma.10G113400.1	Glyma.10G113400	PF00010	PF07714	PF00069	0.0129946	0.147698	0.776521
glyma.Wm82.gnm2.ann1.Glyma.10G271700.1	Glyma.10G271700	PF00249	PF07714	PF00069	7.12378e-06	0.0226614	0.977304
glyma.Wm82.gnm2.ann1.Glyma.10G298700.1	Glyma.10G298700	PF00249	PF10545	PF12776	0.199116	0.29843	0.462842
glyma.Wm82.gnm2.ann1.Glyma.10G298700.2	Glyma.10G298700	PF12776	PF10545	PF00249	0.0344145	0.062575	0.848644
glyma.Wm82.gnm2.ann1.Glyma.10G214900.1	Glyma.10G214900	PF00326	PF12697	PF00561	0.0494559	0.140051	0.788002
glyma.Wm82.gnm2.ann1.Glyma.10G212200.1	Glyma.10G212200	PF00439	PF02902	PF03732	0.0527211	0.0702914	0.155668
glyma.Wm82.gnm2.ann1.Glyma.10G265900.1	Glyma.10G265900	PF00578	PF03190	PF00085	0.00593573	0.00615784	0.9772
glyma.Wm82.gnm2.ann1.Glyma.10G265900.2	Glyma.10G265900	PF03190	PF00578	PF00085	0.00622232	0.00660048	0.976027
glyma.Wm82.gnm2.ann1.Glyma.10G005300.1	Glyma.10G005300	PF00955	PF00361	PF00916	0.084617	0.111965	0.130539
glyma.Wm82.gnm2.ann1.Glyma.10G046300.1	Glyma.10G046300	PF09763	PF02854	PF01928	0.0580318	0.0594184	0.0678633
glyma.Wm82.gnm2.ann1.Glyma.10G141200.1	Glyma.10G141200	PF00248	PF01106	PF00111	0.0400618	0.0585255	0.0869354
glyma.Wm82.gnm2.ann1.Glyma.10G042000.1	Glyma.10G042000	PF05486	PF03168	PF02941	0.0577449	0.0845128	0.213572
glyma.Wm82.gnm2.ann1.Glyma.10G048300.1	Glyma.10G048300	PF07228	PF01138	PF04406	0.000123588	0.000158856	0.999125
glyma.Wm82.gnm2.ann1.Glyma.10G135900.1	Glyma.10G135900	PF12937	PF01273	PF00646	0.0520361	0.0679658	0.325056
glyma.Wm82.gnm2.ann1.Glyma.10G070100.1	Glyma.10G070100	PF01794	PF07884	PF13962	0.138957	0.17017	0.246517
glyma.Wm82.gnm2.ann1.Glyma.10G106400.1	Glyma.10G106400	PF00076	PF00042	PF00651	0.0967375	0.115114	0.148365
glyma.Wm82.gnm2.ann1.Glyma.10G297200.1	Glyma.10G297200	PF11838	PF13302	PF10075	0.0666267	0.0680301	0.0783294
glyma.Wm82.gnm2.ann1.Glyma.10G144100.1	Glyma.10G144100	PF00010	PF00505	PF07651	0.0403109	0.0486989	0.319238
glyma.Wm82.gnm2.ann1.Glyma.10G200800.1	Glyma.10G200800	PF00849	PF00346	PF00271	0.0641949	0.0695504	0.0789693
glyma.Wm82.gnm2.ann1.Glyma.10G282900.1	Glyma.10G282900	PF00626	PF07228	PF00481	1.35947e-05	0.0287282	0.971221
glyma.Wm82.gnm2.ann1.Glyma.10G096800.1	Glyma.10G096800	PF02201	PF07714	PF00069	0.000641804	0.0234641	0.973171
glyma.Wm82.gnm2.ann1.Glyma.10G096800.4	Glyma.10G096800	PF02201	PF07714	PF00069	0.000564727	0.0194186	0.977972
glyma.Wm82.gnm2.ann1.Glyma.10G096800.2	Glyma.10G096800	PF02201	PF07714	PF00069	0.000565902	0.0194621	0.977918
glyma.Wm82.gnm2.ann1.Glyma.10G096800.3	Glyma.10G096800	PF02201	PF07714	PF00069	0.000566283	0.0194318	0.977961
glyma.Wm82.gnm2.ann1.Glyma.10G188700.1	Glyma.10G188700	PF00188	PF10276	PF00089	0.0339326	0.0875688	0.0995097
glyma.Wm82.gnm2.ann1.Glyma.10G292100.1	Glyma.10G292100	PF01928	PF10377	PF00169	0.0675323	0.0716718	0.104359
glyma.Wm82.gnm2.ann1.Glyma.10G292100.2	Glyma.10G292100	PF10377	PF01928	PF00169	0.0616766	0.0867525	0.0949088
glyma.Wm82.gnm2.ann1.Glyma.10G080800.1	Glyma.10G080800	PF10502	PF13180	PF03168	0.0103508	0.033369	0.867807
glyma.Wm82.gnm2.ann1.Glyma.10G278100.2	Glyma.10G278100	PF02263	PF01145	PF01105	0.000865272	0.00367393	0.985188
glyma.Wm82.gnm2.ann1.Glyma.10G278100.3	Glyma.10G278100	PF02263	PF01145	PF01105	0.000865272	0.00367393	0.985188
glyma.Wm82.gnm2.ann1.Glyma.10G278100.1	Glyma.10G278100	PF02263	PF01145	PF01105	0.000865272	0.00367393	0.985188
glyma.Wm82.gnm2.ann1.Glyma.10G191400.1	Glyma.10G191400	PF09405	PF04059	PF00076	0.00100233	0.00100834	0.99646
glyma.Wm82.gnm2.ann1.Glyma.10G272200.1	Glyma.10G272200	PF02263	PF12923	PF00254	0.0640761	0.174053	0.360082
glyma.Wm82.gnm2.ann1.Glyma.10G272200.2	Glyma.10G272200	PF00254	PF12923	PF14204	0.178531	0.21214	0.221059
glyma.Wm82.gnm2.ann1.Glyma.10G263900.1	Glyma.10G263900	PF13088	PF12894	PF08662	0.0687349	0.300926	0.408125
glyma.Wm82.gnm2.ann1.Glyma.10G236500.2	Glyma.10G236500	PF02463	PF00027	PF00271	0.0428014	0.0861546	0.13858
glyma.Wm82.gnm2.ann1.Glyma.10G236500.1	Glyma.10G236500	PF02463	PF00027	PF00271	0.0428014	0.0861546	0.13858
glyma.Wm82.gnm2.ann1.Glyma.10G236500.3	Glyma.10G236500	PF00307	PF00134	PF00334	0.0361565	0.0446077	0.142529
glyma.Wm82.gnm2.ann1.Glyma.10G143800.1	Glyma.10G143800	PF04641	PF12171	PF08790	0.102227	0.12673	0.273591
glyma.Wm82.gnm2.ann1.Glyma.10G050300.2	Glyma.10G050300	PF02453	PF03798	PF14360	0.0862136	0.288419	0.423421
glyma.Wm82.gnm2.ann1.Glyma.10G050300.1	Glyma.10G050300	PF02453	PF03798	PF14360	0.0862136	0.288419	0.423421
glyma.Wm82.gnm2.ann1.Glyma.10G023200.1	Glyma.10G023200	PF16740	PF04100	PF01627	0.0703301	0.0941479	0.110288
glyma.Wm82.gnm2.ann1.Glyma.10G134600.2	Glyma.10G134600	PF00855	PF05627	PF00171	0.0446232	0.142179	0.142697
glyma.Wm82.gnm2.ann1.Glyma.10G134600.1	Glyma.10G134600	PF00855	PF05627	PF00171	0.0446232	0.142179	0.142697
glyma.Wm82.gnm2.ann1.Glyma.10G195300.1	Glyma.10G195300	PF03168	PF03330	PF02298	6.67201e-05	0.00022494	0.999546
glyma.Wm82.gnm2.ann1.Glyma.10G057200.1	Glyma.10G057200	PF12907	PF08790	PF02892	0.0844915	0.11031	0.36977
glyma.Wm82.gnm2.ann1.Glyma.10G282000.1	Glyma.10G282000	PF11926	PF00622	PF00168	0.0306989	0.0564706	0.563686
glyma.Wm82.gnm2.ann1.Glyma.10G127800.1	Glyma.10G127800	PF02581	PF02852	PF00224	0.0878007	0.0889616	0.224634
glyma.Wm82.gnm2.ann1.Glyma.10G241600.1	Glyma.10G241600	PF00933	PF01915	PF00082	0.000704167	0.00788502	0.985146
glyma.Wm82.gnm2.ann1.Glyma.10G216000.1	Glyma.10G216000	PF00188	PF00234	PF12999	0.108945	0.12642	0.28303
glyma.Wm82.gnm2.ann1.Glyma.10G216000.2	Glyma.10G216000	PF00188	PF00234	PF12999	0.108945	0.12642	0.28303
glyma.Wm82.gnm2.ann1.Glyma.10G155600.1	Glyma.10G155600	PF08387	PF00646	PF00651	0.00100262	0.00272501	0.990825
glyma.Wm82.gnm2.ann1.Glyma.10G164900.1	Glyma.10G164900	PF10469	PF03129	PF00076	0.00587931	0.00742453	0.901719
glyma.Wm82.gnm2.ann1.Glyma.10G276800.1	Glyma.10G276800	PF00060	PF01061	PF06813	0.00671168	0.0945984	0.851183
glyma.Wm82.gnm2.ann1.Glyma.10G042900.1	Glyma.10G042900	PF06391	PF07743	PF04438	0.00832809	0.0179628	0.957939
glyma.Wm82.gnm2.ann1.Glyma.10G145000.1	Glyma.10G145000	PF03151	PF08627	PF00892	0.108251	0.116885	0.589388
glyma.Wm82.gnm2.ann1.Glyma.10G145000.2	Glyma.10G145000	PF03151	PF00892	PF08627	0.142843	0.212628	0.409077
glyma.Wm82.gnm2.ann1.Glyma.10G102900.1	Glyma.10G102900	PF03104	PF03070	PF01966	0.0480799	0.0628873	0.0916023
glyma.Wm82.gnm2.ann1.Glyma.10G102900.2	Glyma.10G102900	PF10551	PF00149	PF01966	0.0390525	0.0532493	0.0547767
glyma.Wm82.gnm2.ann1.Glyma.10G088300.1	Glyma.10G088300	PF00125	PF07714	PF00069	0.0117517	0.261748	0.704719
glyma.Wm82.gnm2.ann1.Glyma.10G281400.1	Glyma.10G281400	PF02826	PF03446	PF00389	0.0711021	0.0861672	0.835068
glyma.Wm82.gnm2.ann1.Glyma.10G281400.2	Glyma.10G281400	PF02826	PF00389	PF03446	0.0703999	0.38993	0.48603
glyma.Wm82.gnm2.ann1.Glyma.10G295400.3	Glyma.10G295400	PF02581	PF01502	PF00682	1.19724e-05	3.72929e-05	0.999924
glyma.Wm82.gnm2.ann1.Glyma.10G295400.1	Glyma.10G295400	PF02581	PF01502	PF00682	1.19724e-05	3.72929e-05	0.999924
glyma.Wm82.gnm2.ann1.Glyma.10G295400.2	Glyma.10G295400	PF02581	PF01502	PF00682	1.19724e-05	3.72929e-05	0.999924
glyma.Wm82.gnm2.ann1.Glyma.10G295400.4	Glyma.10G295400	PF01979	PF01502	PF00682	1.9092e-05	8.57962e-05	0.999839
glyma.Wm82.gnm2.ann1.Glyma.10G102000.1	Glyma.10G102000	PF07145	PF08969	PF00076	0.0771189	0.0795253	0.118687
glyma.Wm82.gnm2.ann1.Glyma.10G102000.2	Glyma.10G102000	PF00011	PF08969	PF00076	0.0478121	0.085421	0.0952099
glyma.Wm82.gnm2.ann1.Glyma.10G024400.1	Glyma.10G024400	PF03469	PF13499	PF01814	0.0755901	0.0823431	0.19947
glyma.Wm82.gnm2.ann1.Glyma.10G057600.1	Glyma.10G057600	PF01416	PF07714	PF00069	0.000153953	0.0385047	0.96088
glyma.Wm82.gnm2.ann1.Glyma.10G183900.1	Glyma.10G183900	PF06813	PF00916	PF01061	0.0776269	0.0798363	0.084885
glyma.Wm82.gnm2.ann1.Glyma.10G107800.1	Glyma.10G107800	PF03107	PF00097	PF13639	0.0787866	0.153661	0.32014
glyma.Wm82.gnm2.ann1.Glyma.10G116300.1	Glyma.10G116300	PF05699	PF00134	PF00808	0.0411444	0.0497155	0.0792401
glyma.Wm82.gnm2.ann1.Glyma.10G141500.1	Glyma.10G141500	PF01416	PF00133	PF00749	5.5385e-06	0.00665162	0.99333
glyma.Wm82.gnm2.ann1.Glyma.10G246500.1	Glyma.10G246500	PF02469	PF00190	PF01556	0.0268172	0.212933	0.590191
glyma.Wm82.gnm2.ann1.Glyma.10G032800.1	Glyma.10G032800	PF01423	PF02617	PF05486	0.000394111	0.000655651	0.996824
glyma.Wm82.gnm2.ann1.Glyma.10G252700.1	Glyma.10G252700	PF00089	PF07714	PF00069	3.11401e-05	0.0262997	0.973647
glyma.Wm82.gnm2.ann1.Glyma.10G252700.2	Glyma.10G252700	PF00089	PF07714	PF00069	0.000114393	0.0196926	0.980128
glyma.Wm82.gnm2.ann1.Glyma.10G252700.3	Glyma.10G252700	PF00089	PF07714	PF00069	5.80487e-05	0.0449945	0.95489
glyma.Wm82.gnm2.ann1.Glyma.10G175100.1	Glyma.10G175100	PF08387	PF12937	PF00646	0.0304139	0.162898	0.800859
glyma.Wm82.gnm2.ann1.Glyma.10G218500.1	Glyma.10G218500	PF12894	PF08662	PF00481	0.112028	0.163286	0.253257
glyma.Wm82.gnm2.ann1.Glyma.10G047500.2	Glyma.10G047500	PF00536	PF07228	PF00481	7.78375e-06	0.0115591	0.988413
glyma.Wm82.gnm2.ann1.Glyma.10G047500.1	Glyma.10G047500	PF00536	PF07228	PF00481	7.78375e-06	0.0115591	0.988413
glyma.Wm82.gnm2.ann1.Glyma.10G047500.3	Glyma.10G047500	PF01138	PF07228	PF00481	0.000539459	0.0389127	0.957186
glyma.Wm82.gnm2.ann1.Glyma.10G272000.1	Glyma.10G272000	PF04572	PF05686	PF00685	0.0635959	0.0916011	0.196486
glyma.Wm82.gnm2.ann1.Glyma.10G197500.1	Glyma.10G197500	PF14303	PF10545	PF12776	0.0108587	0.0396762	0.915341
glyma.Wm82.gnm2.ann1.Glyma.10G206100.1	Glyma.10G206100	PF05362	PF00254	PF00160	5.51364e-06	5.972e-06	0.999971
glyma.Wm82.gnm2.ann1.Glyma.10G206100.2	Glyma.10G206100	PF00334	PF00498	PF00160	0.000597215	0.000645941	0.99467
glyma.Wm82.gnm2.ann1.Glyma.10G020500.1	Glyma.10G020500	PF00646	PF00141	PF05678	0.0390381	0.0397092	0.179893
glyma.Wm82.gnm2.ann1.Glyma.10G093000.1	Glyma.10G093000	PF03732	PF11789	PF00031	0.0486549	0.1196	0.258729
glyma.Wm82.gnm2.ann1.Glyma.10G206000.1	Glyma.10G206000	PF00010	PF05008	PF00631	0.0575583	0.0870563	0.129849
glyma.Wm82.gnm2.ann1.Glyma.10G120900.1	Glyma.10G120900	PF13640	PF00112	PF00443	0.000539953	0.000991242	0.995513
glyma.Wm82.gnm2.ann1.Glyma.10G120900.3	Glyma.10G120900	PF13640	PF00112	PF00443	0.000270357	0.000863532	0.997102
glyma.Wm82.gnm2.ann1.Glyma.10G120900.2	Glyma.10G120900	PF00644	PF00112	PF00443	0.000229962	0.000356542	0.99822
glyma.Wm82.gnm2.ann1.Glyma.10G169600.1	Glyma.10G169600	PF18511	PF12937	PF00646	0.00782869	0.284466	0.699586
glyma.Wm82.gnm2.ann1.Glyma.10G169600.2	Glyma.10G169600	PF07534	PF00501	PF01243	0.035044	0.0597362	0.0630317
glyma.Wm82.gnm2.ann1.Glyma.10G214600.1	Glyma.10G214600	PF13441	PF01471	PF00076	0.0617847	0.0618413	0.0990782
glyma.Wm82.gnm2.ann1.Glyma.10G161400.2	Glyma.10G161400	PF00249	PF07714	PF00069	1.42808e-06	0.0118345	0.988161
glyma.Wm82.gnm2.ann1.Glyma.10G161400.1	Glyma.10G161400	PF00249	PF07714	PF00069	1.42808e-06	0.0118345	0.988161
glyma.Wm82.gnm2.ann1.Glyma.10G080400.1	Glyma.10G080400	PF00249	PF12776	PF05703	0.0693395	0.0701596	0.238055
glyma.Wm82.gnm2.ann1.Glyma.10G111700.1	Glyma.10G111700	PF00326	PF12697	PF00561	0.00473426	0.178811	0.812746
glyma.Wm82.gnm2.ann1.Glyma.10G111700.2	Glyma.10G111700	PF00326	PF12697	PF00561	0.00520941	0.169522	0.821518
glyma.Wm82.gnm2.ann1.Glyma.10G111700.3	Glyma.10G111700	PF00326	PF12697	PF00561	0.00757172	0.135447	0.845357
glyma.Wm82.gnm2.ann1.Glyma.10G189500.2	Glyma.10G189500	PF04059	PF05182	PF00076	0.000746387	0.00153643	0.996285
glyma.Wm82.gnm2.ann1.Glyma.10G189500.3	Glyma.10G189500	PF04059	PF05182	PF00076	0.000746387	0.00153643	0.996285
glyma.Wm82.gnm2.ann1.Glyma.10G189500.1	Glyma.10G189500	PF04059	PF05182	PF00076	0.000746387	0.00153643	0.996285
glyma.Wm82.gnm2.ann1.Glyma.10G109600.1	Glyma.10G109600	PF00155	PF00582	PF00389	0.0445255	0.0586146	0.068631
glyma.Wm82.gnm2.ann1.Glyma.10G151400.1	Glyma.10G151400	PF03101	PF00168	PF07727	0.0553989	0.0571496	0.196089
glyma.Wm82.gnm2.ann1.Glyma.10G195600.1	Glyma.10G195600	PF10187	PF04065	PF02179	0.0904817	0.110097	0.393155
glyma.Wm82.gnm2.ann1.Glyma.10G262800.1	Glyma.10G262800	PF00326	PF12697	PF00561	0.0298672	0.168642	0.752296
glyma.Wm82.gnm2.ann1.Glyma.10G233500.1	Glyma.10G233500	PF00249	PF07714	PF00069	0.000200528	0.0319583	0.967525
glyma.Wm82.gnm2.ann1.Glyma.10G233500.2	Glyma.10G233500	PF00249	PF07714	PF00069	0.000159117	0.0315865	0.967952
glyma.Wm82.gnm2.ann1.Glyma.10G154300.1	Glyma.10G154300	PF00650	PF03364	PF04755	0.040141	0.172725	0.450713
glyma.Wm82.gnm2.ann1.Glyma.10G205700.1	Glyma.10G205700	PF05678	PF05486	PF04927	0.0510913	0.0742399	0.127085
glyma.Wm82.gnm2.ann1.Glyma.10G150000.1	Glyma.10G150000	PF00646	PF08662	PF12894	0.0359149	0.27897	0.374916
glyma.Wm82.gnm2.ann1.Glyma.10G150000.2	Glyma.10G150000	PF13088	PF12894	PF08662	0.0247842	0.351123	0.515809
glyma.Wm82.gnm2.ann1.Glyma.10G032600.1	Glyma.10G032600	PF00689	PF04893	PF02453	0.0534322	0.0784526	0.561443
glyma.Wm82.gnm2.ann1.Glyma.10G168300.2	Glyma.10G168300	PF00754	PF00059	PF08662	0.0795589	0.255291	0.29377
glyma.Wm82.gnm2.ann1.Glyma.10G168300.1	Glyma.10G168300	PF00754	PF00059	PF08662	0.0795589	0.255291	0.29377
glyma.Wm82.gnm2.ann1.Glyma.10G186900.1	Glyma.10G186900	PF10545	PF12776	PF03732	0.0373714	0.0462321	0.118344
glyma.Wm82.gnm2.ann1.Glyma.10G207400.1	Glyma.10G207400	PF04101	PF13409	PF01814	0.0519797	0.190191	0.278538
glyma.Wm82.gnm2.ann1.Glyma.10G207400.3	Glyma.10G207400	PF00042	PF08542	PF01814	0.0676436	0.113681	0.192838
glyma.Wm82.gnm2.ann1.Glyma.10G207400.2	Glyma.10G207400	PF00042	PF13409	PF04101	0.0621865	0.113884	0.117415
glyma.Wm82.gnm2.ann1.Glyma.10G278200.1	Glyma.10G278200	PF00567	PF00564	PF00168	0.0216134	0.0671952	0.670678
glyma.Wm82.gnm2.ann1.Glyma.10G272100.1	Glyma.10G272100	PF10551	PF04970	PF00596	0.0696599	0.0875465	0.116252
glyma.Wm82.gnm2.ann1.Glyma.10G125400.1	Glyma.10G125400	PF00234	PF14368	PF05617	0.166423	0.218159	0.249601
glyma.Wm82.gnm2.ann1.Glyma.10G043300.1	Glyma.10G043300	PF01823	PF00646	PF00168	0.0407284	0.0427483	0.449806
glyma.Wm82.gnm2.ann1.Glyma.10G213400.1	Glyma.10G213400	PF07743	PF00685	PF01814	0.0327075	0.0558301	0.347118
glyma.Wm82.gnm2.ann1.Glyma.10G275600.1	Glyma.10G275600	PF01571	PF00027	PF01336	0.0458785	0.061163	0.106118
glyma.Wm82.gnm2.ann1.Glyma.10G099100.1	Glyma.10G099100	PF00046	PF00089	PF00188	0.0273923	0.0494071	0.0837026
glyma.Wm82.gnm2.ann1.Glyma.10G134700.1	Glyma.10G134700	PF01841	PF00188	PF13091	0.0507584	0.199427	0.241947
glyma.Wm82.gnm2.ann1.Glyma.10G077200.1	Glyma.10G077200	PF14634	PF13639	PF00097	0.093527	0.311353	0.365426
glyma.Wm82.gnm2.ann1.Glyma.10G060600.1	Glyma.10G060600	PF02737	PF01593	PF01494	0.056591	0.0684261	0.0706445
glyma.Wm82.gnm2.ann1.Glyma.10G129300.1	Glyma.10G129300	PF01902	PF00248	PF00550	0.0652264	0.0671523	0.111047
glyma.Wm82.gnm2.ann1.Glyma.10G179800.1	Glyma.10G179800	PF02037	PF04696	PF07557	0.0849123	0.0880196	0.38943
glyma.Wm82.gnm2.ann1.Glyma.10G192800.1	Glyma.10G192800	PF08767	PF10350	PF08389	0.104176	0.239945	0.337427
glyma.Wm82.gnm2.ann1.Glyma.10G157000.1	Glyma.10G157000	PF00160	PF00139	PF00497	0.0580358	0.0972499	0.174486
glyma.Wm82.gnm2.ann1.Glyma.10G157000.2	Glyma.10G157000	PF00160	PF00139	PF00497	0.0580358	0.0972499	0.174486
glyma.Wm82.gnm2.ann1.Glyma.10G157000.3	Glyma.10G157000	PF00254	PF00026	PF00160	0.0446396	0.0598604	0.0990053
glyma.Wm82.gnm2.ann1.Glyma.10G100800.1	Glyma.10G100800	PF03143	PF07728	PF00027	0.117783	0.134479	0.154007
glyma.Wm82.gnm2.ann1.Glyma.10G072000.1	Glyma.10G072000	PF02037	PF11976	PF00011	0.0215853	0.0732907	0.114191
glyma.Wm82.gnm2.ann1.Glyma.10G230200.1	Glyma.10G230200	PF05920	PF00046	PF00505	0.0999588	0.101168	0.416826
glyma.Wm82.gnm2.ann1.Glyma.10G117100.1	Glyma.10G117100	PF00650	PF13409	PF09346	0.0673614	0.090774	0.0986629
glyma.Wm82.gnm2.ann1.Glyma.10G117100.2	Glyma.10G117100	PF13409	PF08241	PF09346	0.0673771	0.0747519	0.112471
glyma.Wm82.gnm2.ann1.Glyma.10G033400.1	Glyma.10G033400	PF00149	PF00026	PF14543	0.0494033	0.0528393	0.0832251
glyma.Wm82.gnm2.ann1.Glyma.10G151500.1	Glyma.10G151500	PF14634	PF00097	PF13639	0.0944882	0.335334	0.473417
glyma.Wm82.gnm2.ann1.Glyma.10G151500.2	Glyma.10G151500	PF14634	PF00097	PF13639	0.101238	0.351675	0.453178
glyma.Wm82.gnm2.ann1.Glyma.10G053400.1	Glyma.10G053400	PF16987	PF16740	PF10545	0.0453177	0.047021	0.085659
glyma.Wm82.gnm2.ann1.Glyma.10G083000.1	Glyma.10G083000	PF00176	PF00271	PF00501	0.0369532	0.042615	0.0754895
glyma.Wm82.gnm2.ann1.Glyma.10G173300.1	Glyma.10G173300	PF02845	PF00076	PF02263	0.0563375	0.0741862	0.0811544
glyma.Wm82.gnm2.ann1.Glyma.10G283300.1	Glyma.10G283300	PF06391	PF17780	PF00076	0.00121031	0.00202254	0.982752
glyma.Wm82.gnm2.ann1.Glyma.10G283300.2	Glyma.10G283300	PF00085	PF12656	PF00076	0.000765054	0.00128185	0.988961
glyma.Wm82.gnm2.ann1.Glyma.10G283300.3	Glyma.10G283300	PF00085	PF12656	PF00076	0.000765054	0.00128185	0.988961
glyma.Wm82.gnm2.ann1.Glyma.10G253100.1	Glyma.10G253100	PF07647	PF07714	PF00069	7.67192e-06	0.0279168	0.972061
glyma.Wm82.gnm2.ann1.Glyma.10G259400.1	Glyma.10G259400	PF00626	PF07228	PF00481	4.57031e-05	0.013858	0.986028
glyma.Wm82.gnm2.ann1.Glyma.10G177400.1	Glyma.10G177400	PF05175	PF00899	PF13847	0.0961385	0.141878	0.211412
glyma.Wm82.gnm2.ann1.Glyma.10G217400.1	Glyma.10G217400	PF05678	PF06839	PF00011	0.0392415	0.0416578	0.229722
glyma.Wm82.gnm2.ann1.Glyma.10G066900.1	Glyma.10G066900	PF13259	PF05687	PF05678	0.0547749	0.0608191	0.0885447
glyma.Wm82.gnm2.ann1.Glyma.10G072700.1	Glyma.10G072700	PF17172	PF13417	PF13409	0.0417154	0.0437278	0.870412
glyma.Wm82.gnm2.ann1.Glyma.10G072700.2	Glyma.10G072700	PF00462	PF17172	PF13409	0.0409859	0.0869132	0.823779
glyma.Wm82.gnm2.ann1.Glyma.10G027900.1	Glyma.10G027900	PF06747	PF00856	PF01753	0.0920138	0.208018	0.255987
glyma.Wm82.gnm2.ann1.Glyma.10G103100.2	Glyma.10G103100	PF00249	PF07714	PF00069	6.66881e-06	0.0153934	0.984592
glyma.Wm82.gnm2.ann1.Glyma.10G103100.1	Glyma.10G103100	PF00249	PF07714	PF00069	6.66881e-06	0.0153934	0.984592
glyma.Wm82.gnm2.ann1.Glyma.10G173600.1	Glyma.10G173600	PF10545	PF12171	PF02892	0.00608932	0.0166638	0.961538
glyma.Wm82.gnm2.ann1.Glyma.10G086100.1	Glyma.10G086100	PF01105	PF00060	PF07885	0.0293274	0.0563882	0.0897482
glyma.Wm82.gnm2.ann1.Glyma.10G280600.1	Glyma.10G280600	PF03016	PF09258	PF04572	0.0431006	0.0534397	0.668942
glyma.Wm82.gnm2.ann1.Glyma.10G280600.2	Glyma.10G280600	PF09258	PF03016	PF04572	0.0322153	0.0358242	0.767354
glyma.Wm82.gnm2.ann1.Glyma.10G280600.6	Glyma.10G280600	PF04572	PF10551	PF00535	0.0877026	0.159302	0.18256
glyma.Wm82.gnm2.ann1.Glyma.10G280600.4	Glyma.10G280600	PF04572	PF00535	PF10551	0.116108	0.128777	0.135938
glyma.Wm82.gnm2.ann1.Glyma.10G280600.5	Glyma.10G280600	PF04572	PF00535	PF10551	0.116108	0.128777	0.135938
glyma.Wm82.gnm2.ann1.Glyma.10G280600.7	Glyma.10G280600	PF04572	PF00535	PF10551	0.116108	0.128777	0.135938
glyma.Wm82.gnm2.ann1.Glyma.10G280600.3	Glyma.10G280600	PF00150	PF01094	PF04572	0.0181125	0.019922	0.866656
glyma.Wm82.gnm2.ann1.Glyma.10G052300.1	Glyma.10G052300	PF13966	PF12937	PF00646	0.102774	0.170268	0.311885
glyma.Wm82.gnm2.ann1.Glyma.10G001600.1	Glyma.10G001600	PF16953	PF10551	PF04446	0.0281566	0.03807	0.801041
glyma.Wm82.gnm2.ann1.Glyma.10G009600.1	Glyma.10G009600	PF00080	PF04043	PF00141	2.99109e-06	9.41414e-06	0.999981
glyma.Wm82.gnm2.ann1.Glyma.10G228600.1	Glyma.10G228600	PF00059	PF11721	PF00069	0.0629666	0.0714843	0.245015
glyma.Wm82.gnm2.ann1.Glyma.10G077500.1	Glyma.10G077500	PF14634	PF13639	PF00097	0.0879535	0.334745	0.341495
glyma.Wm82.gnm2.ann1.Glyma.10G258900.1	Glyma.10G258900	PF02320	PF07802	PF12907	0.0860142	0.132774	0.307215
glyma.Wm82.gnm2.ann1.Glyma.10G112100.1	Glyma.10G112100	PF05529	PF13456	PF05699	0.0697027	0.0703611	0.0859949
glyma.Wm82.gnm2.ann1.Glyma.10G238400.1	Glyma.10G238400	PF13456	PF02201	PF00248	0.0425936	0.0549948	0.0885714
glyma.Wm82.gnm2.ann1.Glyma.10G092200.1	Glyma.10G092200	PF13802	PF17137	PF00168	0.00198441	0.00247094	0.991244
glyma.Wm82.gnm2.ann1.Glyma.10G058800.1	Glyma.10G058800	PF00060	PF01061	PF06813	0.0123793	0.0725318	0.851451
glyma.Wm82.gnm2.ann1.Glyma.10G058800.2	Glyma.10G058800	PF00060	PF01061	PF06813	0.0123415	0.0651872	0.879488
glyma.Wm82.gnm2.ann1.Glyma.10G297300.1	Glyma.10G297300	PF13532	PF00144	PF13640	0.0215443	0.025022	0.79931
glyma.Wm82.gnm2.ann1.Glyma.10G297300.2	Glyma.10G297300	PF00144	PF00497	PF02469	0.0498476	0.156403	0.210408
glyma.Wm82.gnm2.ann1.Glyma.10G297300.3	Glyma.10G297300	PF00571	PF01852	PF02469	0.0427816	0.0528666	0.349712
glyma.Wm82.gnm2.ann1.Glyma.10G057900.1	Glyma.10G057900	PF13639	PF13966	PF00651	0.1113	0.128085	0.171029
glyma.Wm82.gnm2.ann1.Glyma.10G043700.2	Glyma.10G043700	PF02737	PF04321	PF03446	0.102631	0.110628	0.136093
glyma.Wm82.gnm2.ann1.Glyma.10G043700.3	Glyma.10G043700	PF02737	PF04321	PF03446	0.102631	0.110628	0.136093
glyma.Wm82.gnm2.ann1.Glyma.10G043700.1	Glyma.10G043700	PF02737	PF04321	PF03446	0.102631	0.110628	0.136093
glyma.Wm82.gnm2.ann1.Glyma.10G294000.1	Glyma.10G294000	PF08698	PF06886	PF00505	0.000623649	0.00127084	0.996356
glyma.Wm82.gnm2.ann1.Glyma.10G214000.1	Glyma.10G214000	PF00407	PF00622	PF00117	0.0737698	0.0831823	0.321694
glyma.Wm82.gnm2.ann1.Glyma.10G214000.2	Glyma.10G214000	PF03876	PF00117	PF00407	0.0596933	0.268911	0.438201
glyma.Wm82.gnm2.ann1.Glyma.10G298000.1	Glyma.10G298000	PF01168	PF00168	PF01326	0.0348938	0.0552593	0.831479
glyma.Wm82.gnm2.ann1.Glyma.10G217800.1	Glyma.10G217800	PF05686	PF04572	PF03016	0.0908465	0.334354	0.508634
glyma.Wm82.gnm2.ann1.Glyma.10G243700.1	Glyma.10G243700	PF01261	PF00724	PF00248	3.11878e-07	3.65385e-07	0.999998
glyma.Wm82.gnm2.ann1.Glyma.10G237400.1	Glyma.10G237400	PF06003	PF12656	PF04774	0.0850107	0.106713	0.143634
glyma.Wm82.gnm2.ann1.Glyma.10G237400.2	Glyma.10G237400	PF17780	PF05182	PF06003	0.0933626	0.101557	0.290524
glyma.Wm82.gnm2.ann1.Glyma.10G237400.3	Glyma.10G237400	PF17780	PF05182	PF06003	0.0933626	0.101557	0.290524
glyma.Wm82.gnm2.ann1.Glyma.10G252300.1	Glyma.10G252300	PF00590	PF04101	PF06574	0.090148	0.106407	0.205368
glyma.Wm82.gnm2.ann1.Glyma.10G035700.1	Glyma.10G035700	PF15511	PF02201	PF16679	0.00180817	0.00269642	0.992027
glyma.Wm82.gnm2.ann1.Glyma.10G045300.1	Glyma.10G045300	PF00443	PF12171	PF12756	0.140625	0.293939	0.34265
glyma.Wm82.gnm2.ann1.Glyma.10G093100.1	Glyma.10G093100	PF07716	PF00170	PF00010	0.000282447	0.000819001	0.998589
glyma.Wm82.gnm2.ann1.Glyma.10G199200.1	Glyma.10G199200	PF00027	PF06472	PF01399	0.0478548	0.0585722	0.0860022
glyma.Wm82.gnm2.ann1.Glyma.10G282100.1	Glyma.10G282100	PF07992	PF08491	PF01494	5.3331e-05	0.405009	0.594897
glyma.Wm82.gnm2.ann1.Glyma.10G282100.2	Glyma.10G282100	PF07992	PF08491	PF01494	0.000405489	0.172526	0.826822
glyma.Wm82.gnm2.ann1.Glyma.10G282100.4	Glyma.10G282100	PF07992	PF08491	PF01494	0.0270221	0.0632116	0.900433
glyma.Wm82.gnm2.ann1.Glyma.10G282100.3	Glyma.10G282100	PF07992	PF08491	PF01494	0.0129446	0.0654479	0.914515
glyma.Wm82.gnm2.ann1.Glyma.10G054800.1	Glyma.10G054800	PF00127	PF05627	PF02298	0.000238788	0.000739002	0.998326
glyma.Wm82.gnm2.ann1.Glyma.10G231500.1	Glyma.10G231500	PF00454	PF07714	PF00069	5.9808e-05	0.0296223	0.970209
glyma.Wm82.gnm2.ann1.Glyma.10G057500.1	Glyma.10G057500	PF09412	PF13640	PF02338	0.000209558	0.000366962	0.99798
glyma.Wm82.gnm2.ann1.Glyma.10G063500.1	Glyma.10G063500	PF04280	PF07743	PF09350	0.00393799	0.00443884	0.958256
glyma.Wm82.gnm2.ann1.Glyma.10G158000.2	Glyma.10G158000	PF00326	PF07859	PF00135	0.0299328	0.15935	0.806676
glyma.Wm82.gnm2.ann1.Glyma.10G158000.1	Glyma.10G158000	PF00326	PF07859	PF00135	0.0299328	0.159349	0.806677
glyma.Wm82.gnm2.ann1.Glyma.10G055200.1	Glyma.10G055200	PF12756	PF02892	PF12171	0.015679	0.0319009	0.935717
glyma.Wm82.gnm2.ann1.Glyma.10G014700.1	Glyma.10G014700	PF13905	PF00578	PF00085	0.00319459	0.00921151	0.985009
glyma.Wm82.gnm2.ann1.Glyma.10G233200.1	Glyma.10G233200	PF01408	PF05368	PF03446	0.0849818	0.130385	0.135075
glyma.Wm82.gnm2.ann1.Glyma.10G233200.2	Glyma.10G233200	PF01658	PF01113	PF03446	0.0664631	0.116208	0.181538
glyma.Wm82.gnm2.ann1.Glyma.10G175700.1	Glyma.10G175700	PF01909	PF01399	PF00571	0.0492042	0.143097	0.279126
glyma.Wm82.gnm2.ann1.Glyma.10G165200.1	Glyma.10G165200	PF00150	PF00059	PF00704	0.106953	0.166946	0.173396
glyma.Wm82.gnm2.ann1.Glyma.10G246700.1	Glyma.10G246700	PF00234	PF00403	PF04043	0.0451882	0.3046	0.401104
glyma.Wm82.gnm2.ann1.Glyma.10G276500.1	Glyma.10G276500	PF14111	PF00076	PF00098	0.0046808	0.03623	0.942611
glyma.Wm82.gnm2.ann1.Glyma.10G276500.2	Glyma.10G276500	PF09405	PF05627	PF00076	0.000288546	0.000349982	0.997344
glyma.Wm82.gnm2.ann1.Glyma.10G176300.1	Glyma.10G176300	PF00781	PF00646	PF08100	0.0412979	0.0523112	0.230844
glyma.Wm82.gnm2.ann1.Glyma.10G124400.1	Glyma.10G124400	PF06839	PF00059	PF10551	0.0486689	0.0652502	0.0813722
glyma.Wm82.gnm2.ann1.Glyma.10G194300.1	Glyma.10G194300	PF00294	PF00696	PF00365	0.000110956	0.000533287	0.998712
glyma.Wm82.gnm2.ann1.Glyma.10G194300.3	Glyma.10G194300	PF00781	PF00696	PF00365	4.8634e-05	0.000348219	0.999286
glyma.Wm82.gnm2.ann1.Glyma.10G194300.2	Glyma.10G194300	PF02852	PF00696	PF00365	5.22363e-05	0.000336684	0.99927
glyma.Wm82.gnm2.ann1.Glyma.10G194300.4	Glyma.10G194300	PF00781	PF00696	PF00365	7.12794e-05	0.00059857	0.998761
glyma.Wm82.gnm2.ann1.Glyma.10G194300.5	Glyma.10G194300	PF00781	PF00696	PF00365	8.5969e-05	0.00014019	0.999162
glyma.Wm82.gnm2.ann1.Glyma.10G194300.6	Glyma.10G194300	PF02852	PF00696	PF00365	0.000200595	0.000332599	0.998646
glyma.Wm82.gnm2.ann1.Glyma.10G207800.1	Glyma.10G207800	PF13878	PF01509	PF00849	2.3273e-05	2.87746e-05	0.999936
glyma.Wm82.gnm2.ann1.Glyma.10G207800.2	Glyma.10G207800	PF04406	PF13878	PF00849	0.000295422	0.000457425	0.997928
glyma.Wm82.gnm2.ann1.Glyma.10G268000.1	Glyma.10G268000	PF00916	PF08627	PF00999	0.101345	0.255798	0.280229
glyma.Wm82.gnm2.ann1.Glyma.10G268000.2	Glyma.10G268000	PF03151	PF08627	PF00892	0.176409	0.183279	0.241218
glyma.Wm82.gnm2.ann1.Glyma.10G005200.1	Glyma.10G005200	PF00717	PF00439	PF00636	0.0690238	0.0980826	0.159541
glyma.Wm82.gnm2.ann1.Glyma.10G119000.1	Glyma.10G119000	PF05699	PF00646	PF00134	0.092507	0.0931012	0.258378
glyma.Wm82.gnm2.ann1.Glyma.10G189000.1	Glyma.10G189000	PF00137	PF00892	PF01699	0.0386866	0.0630717	0.740543
glyma.Wm82.gnm2.ann1.Glyma.10G122500.1	Glyma.10G122500	PF17177	PF02861	PF00696	0.0495989	0.0872876	0.142415
glyma.Wm82.gnm2.ann1.Glyma.10G050700.1	Glyma.10G050700	PF05529	PF00690	PF02453	0.0441355	0.0520102	0.232628
glyma.Wm82.gnm2.ann1.Glyma.10G154400.1	Glyma.10G154400	PF17137	PF02837	PF02836	0.119714	0.219313	0.464559
glyma.Wm82.gnm2.ann1.Glyma.10G154400.2	Glyma.10G154400	PF02018	PF02837	PF02836	0.0540823	0.207208	0.530603
glyma.Wm82.gnm2.ann1.Glyma.10G245700.1	Glyma.10G245700	PF01399	PF07928	PF04100	0.142956	0.20157	0.247411
glyma.Wm82.gnm2.ann1.Glyma.10G164700.1	Glyma.10G164700	PF01636	PF07714	PF00069	0.000145709	0.0471428	0.952354
glyma.Wm82.gnm2.ann1.Glyma.10G140500.4	Glyma.10G140500	PF00270	PF04851	PF00271	0.203254	0.273651	0.392363
glyma.Wm82.gnm2.ann1.Glyma.10G140500.3	Glyma.10G140500	PF00270	PF04851	PF00271	0.108284	0.178316	0.602329
glyma.Wm82.gnm2.ann1.Glyma.10G297000.1	Glyma.10G297000	PF00689	PF07885	PF13962	0.0393747	0.0525159	0.120789
glyma.Wm82.gnm2.ann1.Glyma.10G108300.1	Glyma.10G108300	PF00168	PF13976	PF01423	0.0368211	0.0737628	0.0755903
glyma.Wm82.gnm2.ann1.Glyma.10G178200.2	Glyma.10G178200	PF00149	PF02362	PF14416	0.000167354	0.0004128	0.998896
glyma.Wm82.gnm2.ann1.Glyma.10G178200.1	Glyma.10G178200	PF00149	PF02362	PF14416	0.000167354	0.0004128	0.998896
glyma.Wm82.gnm2.ann1.Glyma.10G099900.1	Glyma.10G099900	PF08627	PF00916	PF01699	0.12105	0.143683	0.437189
glyma.Wm82.gnm2.ann1.Glyma.10G013400.1	Glyma.10G013400	PF04100	PF04048	PF06148	0.0339565	0.073532	0.858575
glyma.Wm82.gnm2.ann1.Glyma.10G168600.1	Glyma.10G168600	PF00271	PF02854	PF02037	0.0334137	0.0361997	0.635247
glyma.Wm82.gnm2.ann1.Glyma.10G038400.1	Glyma.10G038400	PF00249	PF07714	PF00069	2.70654e-05	0.013513	0.986425
glyma.Wm82.gnm2.ann1.Glyma.10G038400.2	Glyma.10G038400	PF00249	PF07714	PF00069	2.96667e-05	0.0128108	0.98712
glyma.Wm82.gnm2.ann1.Glyma.10G038400.4	Glyma.10G038400	PF00249	PF07714	PF00069	2.96667e-05	0.0128108	0.98712
glyma.Wm82.gnm2.ann1.Glyma.10G038400.6	Glyma.10G038400	PF00249	PF07714	PF00069	2.96667e-05	0.0128108	0.98712
glyma.Wm82.gnm2.ann1.Glyma.10G038400.8	Glyma.10G038400	PF00249	PF07714	PF00069	9.13485e-06	0.0185414	0.981425
glyma.Wm82.gnm2.ann1.Glyma.10G038400.3	Glyma.10G038400	PF01636	PF07714	PF00069	8.86556e-06	0.0160453	0.98392
glyma.Wm82.gnm2.ann1.Glyma.10G038400.5	Glyma.10G038400	PF01636	PF07714	PF00069	8.86556e-06	0.0160453	0.98392
glyma.Wm82.gnm2.ann1.Glyma.10G038400.7	Glyma.10G038400	PF02902	PF07714	PF00069	4.88981e-06	0.0239164	0.976064
glyma.Wm82.gnm2.ann1.Glyma.10G056000.1	Glyma.10G056000	PF01521	PF00254	PF04266	0.0687607	0.0982603	0.236647
glyma.Wm82.gnm2.ann1.Glyma.10G057100.1	Glyma.10G057100	PF13086	PF07728	PF00004	0.00312854	0.0125734	0.978129
glyma.Wm82.gnm2.ann1.Glyma.10G081600.1	Glyma.10G081600	PF07714	PF00069	PF00010	0.0752147	0.0960185	0.127293
glyma.Wm82.gnm2.ann1.Glyma.10G163100.1	Glyma.10G163100	PF00046	PF13259	PF00249	0.0522321	0.0723257	0.249884
glyma.Wm82.gnm2.ann1.Glyma.10G121600.4	Glyma.10G121600	PF01423	PF04266	PF00168	0.054824	0.0577375	0.0811795
glyma.Wm82.gnm2.ann1.Glyma.10G121600.2	Glyma.10G121600	PF01423	PF04266	PF00168	0.054824	0.0577375	0.0811795
glyma.Wm82.gnm2.ann1.Glyma.10G121600.3	Glyma.10G121600	PF01423	PF04266	PF00168	0.054824	0.0577375	0.0811795
glyma.Wm82.gnm2.ann1.Glyma.10G121600.5	Glyma.10G121600	PF01423	PF04266	PF00168	0.054824	0.0577375	0.0811795
glyma.Wm82.gnm2.ann1.Glyma.10G121600.6	Glyma.10G121600	PF01423	PF04266	PF00168	0.054824	0.0577375	0.0811795
glyma.Wm82.gnm2.ann1.Glyma.10G121600.1	Glyma.10G121600	PF01423	PF04266	PF00168	0.054824	0.0577375	0.0811795
glyma.Wm82.gnm2.ann1.Glyma.10G147100.1	Glyma.10G147100	PF04536	PF00254	PF04366	0.0508531	0.186692	0.291729
glyma.Wm82.gnm2.ann1.Glyma.10G283400.1	Glyma.10G283400	PF12755	PF08389	PF03810	0.0312195	0.069097	0.892812
glyma.Wm82.gnm2.ann1.Glyma.10G154600.1	Glyma.10G154600	PF00535	PF05686	PF09258	0.057158	0.146454	0.514719
glyma.Wm82.gnm2.ann1.Glyma.10G122600.1	Glyma.10G122600	PF00188	PF12999	PF03330	0.000389096	0.0180424	0.980959
glyma.Wm82.gnm2.ann1.Glyma.10G094400.1	Glyma.10G094400	PF08492	PF12171	PF07808	0.0558086	0.113237	0.443298
glyma.Wm82.gnm2.ann1.Glyma.10G094400.2	Glyma.10G094400	PF11789	PF09368	PF10419	0.0863566	0.112479	0.15176
glyma.Wm82.gnm2.ann1.Glyma.10G146700.1	Glyma.10G146700	PF08662	PF03478	PF00646	0.144377	0.194145	0.195923
glyma.Wm82.gnm2.ann1.Glyma.10G146700.2	Glyma.10G146700	PF08662	PF03478	PF00646	0.144377	0.194145	0.195923
glyma.Wm82.gnm2.ann1.Glyma.10G100200.1	Glyma.10G100200	PF04266	PF00168	PF01243	0.0651651	0.100166	0.180312
glyma.Wm82.gnm2.ann1.Glyma.10G235400.1	Glyma.10G235400	PF00646	PF00271	PF03732	0.0256733	0.0343893	0.0800721
glyma.Wm82.gnm2.ann1.Glyma.10G197700.1	Glyma.10G197700	PF00107	PF00294	PF13460	0.0573721	0.0676604	0.166204
glyma.Wm82.gnm2.ann1.Glyma.10G197700.2	Glyma.10G197700	PF00294	PF00107	PF13460	0.0491558	0.0644868	0.129119
glyma.Wm82.gnm2.ann1.Glyma.10G197700.3	Glyma.10G197700	PF04321	PF05368	PF13460	0.0605507	0.0650036	0.368492
glyma.Wm82.gnm2.ann1.Glyma.10G047800.1	Glyma.10G047800	PF02854	PF00307	PF07842	0.11361	0.116765	0.424687
glyma.Wm82.gnm2.ann1.Glyma.10G129400.1	Glyma.10G129400	PF00059	PF07714	PF00069	0.0511847	0.0802372	0.419896
glyma.Wm82.gnm2.ann1.Glyma.10G057800.1	Glyma.10G057800	PF10545	PF00505	PF00249	0.00208499	0.00283121	0.98764
glyma.Wm82.gnm2.ann1.Glyma.10G057800.2	Glyma.10G057800	PF10545	PF00505	PF00249	0.00208499	0.00283121	0.98764
glyma.Wm82.gnm2.ann1.Glyma.10G094800.1	Glyma.10G094800	PF07885	PF13962	PF01699	0.0825873	0.109044	0.122383
glyma.Wm82.gnm2.ann1.Glyma.10G142400.1	Glyma.10G142400	PF00307	PF02263	PF01423	0.0595729	0.198342	0.22592
glyma.Wm82.gnm2.ann1.Glyma.10G284900.1	Glyma.10G284900	PF00097	PF13639	PF11789	0.0884932	0.135823	0.456871
glyma.Wm82.gnm2.ann1.Glyma.10G284900.2	Glyma.10G284900	PF12678	PF00097	PF13639	0.0127983	0.194196	0.777472
glyma.Wm82.gnm2.ann1.Glyma.10G284900.4	Glyma.10G284900	PF01485	PF00097	PF13639	0.0269747	0.254824	0.675838
glyma.Wm82.gnm2.ann1.Glyma.10G284900.3	Glyma.10G284900	PF02845	PF17780	PF07145	0.0386195	0.0510427	0.563547
glyma.Wm82.gnm2.ann1.Glyma.10G140100.1	Glyma.10G140100	PF05617	PF00234	PF04043	0.00339757	0.00740679	0.958476
glyma.Wm82.gnm2.ann1.Glyma.10G189200.1	Glyma.10G189200	PF07928	PF12333	PF01624	0.0881687	0.221548	0.257941
glyma.Wm82.gnm2.ann1.Glyma.10G142900.1	Glyma.10G142900	PF01248	PF07716	PF00319	2.27864e-05	4.94995e-05	0.999832
glyma.Wm82.gnm2.ann1.Glyma.10G132900.1	Glyma.10G132900	PF04851	PF00270	PF13086	0.182055	0.213418	0.24332
glyma.Wm82.gnm2.ann1.Glyma.10G177500.2	Glyma.10G177500	PF01061	PF07885	PF00361	0.0673747	0.0715328	0.156857
glyma.Wm82.gnm2.ann1.Glyma.10G177500.1	Glyma.10G177500	PF01061	PF07885	PF00361	0.0673747	0.0715328	0.156857
glyma.Wm82.gnm2.ann1.Glyma.10G071700.3	Glyma.10G071700	PF00010	PF00170	PF07716	0.0943714	0.437024	0.458054
glyma.Wm82.gnm2.ann1.Glyma.10G071700.1	Glyma.10G071700	PF00010	PF00170	PF07716	0.0943714	0.437024	0.458054
glyma.Wm82.gnm2.ann1.Glyma.10G071700.2	Glyma.10G071700	PF00010	PF00170	PF07716	0.0943714	0.437024	0.458054
glyma.Wm82.gnm2.ann1.Glyma.10G073000.1	Glyma.10G073000	PF10469	PF14560	PF11976	0.142421	0.228811	0.400601
glyma.Wm82.gnm2.ann1.Glyma.10G241800.1	Glyma.10G241800	PF17801	PF00251	PF00754	0.170544	0.25309	0.384643
glyma.Wm82.gnm2.ann1.Glyma.10G241800.2	Glyma.10G241800	PF17801	PF00251	PF00754	0.170544	0.25309	0.384643
glyma.Wm82.gnm2.ann1.Glyma.10G062500.1	Glyma.10G062500	PF05603	PF02221	PF00135	0.067314	0.0776721	0.0850997
glyma.Wm82.gnm2.ann1.Glyma.10G291700.1	Glyma.10G291700	PF01565	PF00781	PF00535	0.12195	0.191472	0.377833
glyma.Wm82.gnm2.ann1.Glyma.10G139400.1	Glyma.10G139400	PF00697	PF01182	PF05770	0.118302	0.14001	0.179039
glyma.Wm82.gnm2.ann1.Glyma.10G139400.3	Glyma.10G139400	PF00697	PF01182	PF05770	0.118302	0.140009	0.179039
glyma.Wm82.gnm2.ann1.Glyma.10G139400.4	Glyma.10G139400	PF00697	PF01182	PF05770	0.118302	0.140009	0.179039
glyma.Wm82.gnm2.ann1.Glyma.10G139400.5	Glyma.10G139400	PF00697	PF01182	PF05770	0.118302	0.14001	0.179039
glyma.Wm82.gnm2.ann1.Glyma.10G139400.6	Glyma.10G139400	PF00697	PF01182	PF05770	0.118302	0.14001	0.179039
glyma.Wm82.gnm2.ann1.Glyma.10G139400.7	Glyma.10G139400	PF00697	PF01182	PF05770	0.118302	0.14001	0.179039
glyma.Wm82.gnm2.ann1.Glyma.10G139400.8	Glyma.10G139400	PF00697	PF01182	PF05770	0.118302	0.14001	0.179039
glyma.Wm82.gnm2.ann1.Glyma.10G139400.9	Glyma.10G139400	PF00697	PF01182	PF05770	0.118302	0.14001	0.179039
glyma.Wm82.gnm2.ann1.Glyma.10G139400.2	Glyma.10G139400	PF04909	PF02581	PF01261	0.08353	0.0883649	0.0929391
glyma.Wm82.gnm2.ann1.Glyma.10G139400.10	Glyma.10G139400	PF04909	PF02581	PF01261	0.08353	0.0883649	0.0929391
glyma.Wm82.gnm2.ann1.Glyma.10G053500.1	Glyma.10G053500	PF00168	PF06839	PF02362	0.000100239	0.000104561	0.99921
glyma.Wm82.gnm2.ann1.Glyma.10G196000.1	Glyma.10G196000	PF11976	PF00011	PF10419	0.0365374	0.217773	0.275204
glyma.Wm82.gnm2.ann1.Glyma.10G142000.1	Glyma.10G142000	PF00361	PF01061	PF06813	0.0675518	0.149334	0.407101
glyma.Wm82.gnm2.ann1.Glyma.10G136600.1	Glyma.10G136600	PF05699	PF02320	PF00631	0.049251	0.0840659	0.141137
glyma.Wm82.gnm2.ann1.Glyma.10G059500.1	Glyma.10G059500	PF03446	PF02602	PF00248	0.102476	0.195351	0.473484
glyma.Wm82.gnm2.ann1.Glyma.10G007200.1	Glyma.10G007200	PF14634	PF00097	PF13639	0.0110245	0.207246	0.767666
glyma.Wm82.gnm2.ann1.Glyma.10G125200.1	Glyma.10G125200	PF05617	PF14368	PF00234	0.0961639	0.267084	0.276333
glyma.Wm82.gnm2.ann1.Glyma.10G136700.2	Glyma.10G136700	PF08387	PF12937	PF00646	0.0489033	0.246995	0.695214
glyma.Wm82.gnm2.ann1.Glyma.10G136700.1	Glyma.10G136700	PF08387	PF12937	PF00646	0.0489033	0.246995	0.695214
glyma.Wm82.gnm2.ann1.Glyma.10G136700.3	Glyma.10G136700	PF08387	PF12937	PF00646	0.0247484	0.278034	0.688186
glyma.Wm82.gnm2.ann1.Glyma.10G136700.5	Glyma.10G136700	PF08387	PF12937	PF00646	0.0247484	0.278034	0.688186
glyma.Wm82.gnm2.ann1.Glyma.10G136700.4	Glyma.10G136700	PF08387	PF12937	PF00646	0.0247484	0.278034	0.688186
glyma.Wm82.gnm2.ann1.Glyma.10G026800.1	Glyma.10G026800	PF00732	PF01494	PF01734	0.00192964	0.037636	0.955182
glyma.Wm82.gnm2.ann1.Glyma.10G209700.1	Glyma.10G209700	PF02721	PF04266	PF00027	0.0406166	0.0427978	0.071026
glyma.Wm82.gnm2.ann1.Glyma.10G044900.1	Glyma.10G044900	PF01094	PF02469	PF04043	0.027814	0.0381419	0.485382
glyma.Wm82.gnm2.ann1.Glyma.10G101600.1	Glyma.10G101600	PF02469	PF09430	PF03168	0.0820927	0.146313	0.27404
glyma.Wm82.gnm2.ann1.Glyma.10G101600.2	Glyma.10G101600	PF02469	PF03168	PF09430	0.0973768	0.133992	0.23039
glyma.Wm82.gnm2.ann1.Glyma.10G213600.2	Glyma.10G213600	PF12796	PF17874	PF17177	0.0172083	0.0373379	0.877975
glyma.Wm82.gnm2.ann1.Glyma.10G213600.1	Glyma.10G213600	PF12796	PF17874	PF17177	0.0172083	0.0373379	0.877975
glyma.Wm82.gnm2.ann1.Glyma.10G213600.3	Glyma.10G213600	PF12796	PF17874	PF17177	0.0172083	0.0373379	0.877975
glyma.Wm82.gnm2.ann1.Glyma.10G213600.4	Glyma.10G213600	PF12796	PF17874	PF17177	0.0172083	0.0373379	0.877975
glyma.Wm82.gnm2.ann1.Glyma.10G155800.1	Glyma.10G155800	PF00884	PF03372	PF03171	0.0551969	0.0560654	0.213457
glyma.Wm82.gnm2.ann1.Glyma.10G204300.1	Glyma.10G204300	PF02892	PF12756	PF12171	0.042679	0.118537	0.657571
glyma.Wm82.gnm2.ann1.Glyma.10G240200.1	Glyma.10G240200	PF00631	PF05687	PF00010	0.083288	0.107006	0.156756
glyma.Wm82.gnm2.ann1.Glyma.10G164500.1	Glyma.10G164500	PF01061	PF00535	PF00060	0.0756422	0.151537	0.232137
glyma.Wm82.gnm2.ann1.Glyma.10G032300.1	Glyma.10G032300	PF00443	PF00076	PF01423	0.0215692	0.122026	0.135689
glyma.Wm82.gnm2.ann1.Glyma.10G018100.1	Glyma.10G018100	PF12796	PF17177	PF14432	7.42453e-05	0.0041561	0.995579
glyma.Wm82.gnm2.ann1.Glyma.10G063200.1	Glyma.10G063200	PF01485	PF00097	PF03107	0.119083	0.132314	0.159568
glyma.Wm82.gnm2.ann1.Glyma.10G063200.2	Glyma.10G063200	PF01485	PF00097	PF03107	0.120284	0.171109	0.177139
glyma.Wm82.gnm2.ann1.Glyma.10G063200.3	Glyma.10G063200	PF01485	PF00097	PF03107	0.146242	0.203203	0.209728
glyma.Wm82.gnm2.ann1.Glyma.10G112600.1	Glyma.10G112600	PF00472	PF10545	PF01541	0.0555995	0.070066	0.11583
glyma.Wm82.gnm2.ann1.Glyma.10G023900.1	Glyma.10G023900	PF02845	PF13532	PF03171	0.00361161	0.0181197	0.9644
glyma.Wm82.gnm2.ann1.Glyma.10G023900.2	Glyma.10G023900	PF00011	PF14226	PF03171	0.0343192	0.104271	0.548971
glyma.Wm82.gnm2.ann1.Glyma.10G138000.1	Glyma.10G138000	PF03732	PF00249	PF12776	0.0766831	0.0787627	0.0811903
glyma.Wm82.gnm2.ann1.Glyma.10G203700.1	Glyma.10G203700	PF00892	PF00361	PF00999	0.0910581	0.217135	0.238331
glyma.Wm82.gnm2.ann1.Glyma.10G203700.2	Glyma.10G203700	PF01061	PF00892	PF00361	0.0739835	0.107138	0.287812
glyma.Wm82.gnm2.ann1.Glyma.10G228900.1	Glyma.10G228900	PF00089	PF07714	PF00069	7.23941e-05	0.0330405	0.966825
glyma.Wm82.gnm2.ann1.Glyma.10G228900.2	Glyma.10G228900	PF01636	PF07714	PF00069	2.51697e-05	0.0268663	0.973075
glyma.Wm82.gnm2.ann1.Glyma.10G228900.3	Glyma.10G228900	PF01636	PF07714	PF00069	2.51697e-05	0.0268663	0.973075
glyma.Wm82.gnm2.ann1.Glyma.10G202100.1	Glyma.10G202100	PF05678	PF00447	PF07145	0.0559661	0.0582403	0.297199
glyma.Wm82.gnm2.ann1.Glyma.10G006700.1	Glyma.10G006700	PF06813	PF00361	PF01578	0.129271	0.188575	0.309736
glyma.Wm82.gnm2.ann1.Glyma.10G296000.1	Glyma.10G296000	PF00999	PF00892	PF03151	0.0332024	0.0706037	0.866779
glyma.Wm82.gnm2.ann1.Glyma.10G296000.2	Glyma.10G296000	PF00999	PF00892	PF03151	0.0332024	0.0706037	0.866779
glyma.Wm82.gnm2.ann1.Glyma.10G296000.3	Glyma.10G296000	PF00999	PF00892	PF03151	0.0332024	0.0706037	0.866779
glyma.Wm82.gnm2.ann1.Glyma.10G296000.4	Glyma.10G296000	PF00999	PF00892	PF03151	0.0332024	0.0706037	0.866779
glyma.Wm82.gnm2.ann1.Glyma.10G296000.5	Glyma.10G296000	PF00999	PF00892	PF03151	0.0332024	0.0706037	0.866779
glyma.Wm82.gnm2.ann1.Glyma.10G248100.1	Glyma.10G248100	PF13878	PF18826	PF03468	0.00258951	0.00349303	0.984859
glyma.Wm82.gnm2.ann1.Glyma.10G248100.3	Glyma.10G248100	PF12171	PF13878	PF03468	0.0748908	0.0770218	0.672232
glyma.Wm82.gnm2.ann1.Glyma.10G248100.2	Glyma.10G248100	PF12171	PF00443	PF13878	0.0458321	0.0581764	0.0962648
glyma.Wm82.gnm2.ann1.Glyma.10G236400.2	Glyma.10G236400	PF12776	PF10545	PF00249	0.00100162	0.00238183	0.995665
glyma.Wm82.gnm2.ann1.Glyma.10G236400.1	Glyma.10G236400	PF12776	PF10545	PF00249	0.00100162	0.00238183	0.995665
glyma.Wm82.gnm2.ann1.Glyma.10G236400.3	Glyma.10G236400	PF12776	PF10545	PF00249	0.00100162	0.00238183	0.995665
glyma.Wm82.gnm2.ann1.Glyma.10G125100.1	Glyma.10G125100	PF02878	PF00551	PF00141	0.0378798	0.0594941	0.292853
glyma.Wm82.gnm2.ann1.Glyma.10G125100.2	Glyma.10G125100	PF00697	PF00135	PF03358	0.0139393	0.0180796	0.835369
glyma.Wm82.gnm2.ann1.Glyma.10G125100.3	Glyma.10G125100	PF00697	PF00135	PF03358	0.0139393	0.0180796	0.835369
glyma.Wm82.gnm2.ann1.Glyma.10G125100.4	Glyma.10G125100	PF00697	PF00135	PF03358	0.0139392	0.0180795	0.835369
glyma.Wm82.gnm2.ann1.Glyma.10G209000.2	Glyma.10G209000	PF00027	PF05236	PF17855	0.0532803	0.0558477	0.0576151
glyma.Wm82.gnm2.ann1.Glyma.10G209000.1	Glyma.10G209000	PF00027	PF05236	PF17855	0.0532802	0.0558476	0.057615
glyma.Wm82.gnm2.ann1.Glyma.10G169500.1	Glyma.10G169500	PF04182	PF07106	PF03469	0.0377333	0.0546775	0.0938361
glyma.Wm82.gnm2.ann1.Glyma.10G265000.1	Glyma.10G265000	PF05047	PF06839	PF00141	0.0596124	0.086633	0.0921062
glyma.Wm82.gnm2.ann1.Glyma.10G013100.1	Glyma.10G013100	PF11721	PF12819	PF00139	0.0846631	0.163947	0.507539
glyma.Wm82.gnm2.ann1.Glyma.10G182200.1	Glyma.10G182200	PF11566	PF01466	PF01417	0.0391844	0.171795	0.499035
glyma.Wm82.gnm2.ann1.Glyma.10G182200.2	Glyma.10G182200	PF10440	PF00307	PF00564	0.0831943	0.10445	0.11485
glyma.Wm82.gnm2.ann1.Glyma.10G229800.1	Glyma.10G229800	PF02223	PF01061	PF00005	0.00505219	0.0110729	0.975211
glyma.Wm82.gnm2.ann1.Glyma.10G158300.1	Glyma.10G158300	PF01417	PF00076	PF00098	0.052127	0.0597339	0.411526
glyma.Wm82.gnm2.ann1.Glyma.10G158300.2	Glyma.10G158300	PF01417	PF00076	PF00098	0.052127	0.0597339	0.411526
glyma.Wm82.gnm2.ann1.Glyma.10G003300.1	Glyma.10G003300	PF00582	PF00270	PF00271	0.0367053	0.0414455	0.243219
glyma.Wm82.gnm2.ann1.Glyma.10G134400.1	Glyma.10G134400	PF07716	PF00010	PF00170	0.117034	0.185013	0.237437
glyma.Wm82.gnm2.ann1.Glyma.10G134400.2	Glyma.10G134400	PF07716	PF00010	PF00170	0.114846	0.180498	0.218935
glyma.Wm82.gnm2.ann1.Glyma.10G095800.1	Glyma.10G095800	PF14226	PF00724	PF00171	0.0280543	0.0368545	0.0687175
glyma.Wm82.gnm2.ann1.Glyma.10G234000.1	Glyma.10G234000	PF01145	PF00498	PF00168	0.0728338	0.0776318	0.0974678
glyma.Wm82.gnm2.ann1.Glyma.10G234000.2	Glyma.10G234000	PF00498	PF00168	PF01145	0.0376086	0.0925072	0.0997615
glyma.Wm82.gnm2.ann1.Glyma.10G234000.3	Glyma.10G234000	PF00168	PF02037	PF00076	0.0486439	0.0778805	0.175731
glyma.Wm82.gnm2.ann1.Glyma.10G044400.1	Glyma.10G044400	PF00168	PF06003	PF12656	0.0526564	0.0951527	0.107563
glyma.Wm82.gnm2.ann1.Glyma.10G257500.1	Glyma.10G257500	PF07716	PF00170	PF00010	0.00031314	0.00123852	0.997014
glyma.Wm82.gnm2.ann1.Glyma.10G102200.2	Glyma.10G102200	PF08790	PF12656	PF15477	0.0581746	0.092845	0.636262
glyma.Wm82.gnm2.ann1.Glyma.10G102200.1	Glyma.10G102200	PF08790	PF12656	PF15477	0.0581746	0.092845	0.636262
glyma.Wm82.gnm2.ann1.Glyma.10G102200.8	Glyma.10G102200	PF08790	PF12656	PF15477	0.0380353	0.0623215	0.722929
glyma.Wm82.gnm2.ann1.Glyma.10G102200.3	Glyma.10G102200	PF08790	PF12656	PF15477	0.0380353	0.0623215	0.722929
glyma.Wm82.gnm2.ann1.Glyma.10G102200.10	Glyma.10G102200	PF09405	PF04774	PF15477	0.125708	0.126123	0.22364
glyma.Wm82.gnm2.ann1.Glyma.10G102200.5	Glyma.10G102200	PF09405	PF04774	PF15477	0.125708	0.126123	0.22364
glyma.Wm82.gnm2.ann1.Glyma.10G102200.6	Glyma.10G102200	PF04774	PF09405	PF15477	0.0876101	0.0909442	0.307475
glyma.Wm82.gnm2.ann1.Glyma.10G102200.11	Glyma.10G102200	PF04774	PF09405	PF15477	0.0876101	0.0909442	0.307475
glyma.Wm82.gnm2.ann1.Glyma.10G102200.12	Glyma.10G102200	PF05627	PF04774	PF15477	0.0635719	0.083564	0.657945
glyma.Wm82.gnm2.ann1.Glyma.10G102200.7	Glyma.10G102200	PF05627	PF04774	PF15477	0.0635719	0.083564	0.657945
glyma.Wm82.gnm2.ann1.Glyma.10G102200.4	Glyma.10G102200	PF05627	PF04774	PF15477	0.0597654	0.0829178	0.674058
glyma.Wm82.gnm2.ann1.Glyma.10G102200.9	Glyma.10G102200	PF05627	PF04774	PF15477	0.0597654	0.0829178	0.674058
glyma.Wm82.gnm2.ann1.Glyma.10G102200.13	Glyma.10G102200	PF08790	PF04774	PF15477	0.0203029	0.0215275	0.876714
glyma.Wm82.gnm2.ann1.Glyma.10G088000.1	Glyma.10G088000	PF00128	PF04389	PF04253	0.00163458	0.0382357	0.956262
glyma.Wm82.gnm2.ann1.Glyma.10G180600.1	Glyma.10G180600	PF04928	PF03828	PF03441	0.000105905	0.000107986	0.999538
glyma.Wm82.gnm2.ann1.Glyma.10G180600.2	Glyma.10G180600	PF04928	PF03828	PF03441	0.000105504	0.000113095	0.999525
glyma.Wm82.gnm2.ann1.Glyma.10G180600.3	Glyma.10G180600	PF04928	PF03828	PF03441	0.000105504	0.000113095	0.999525
glyma.Wm82.gnm2.ann1.Glyma.10G214800.6	Glyma.10G214800	PF11835	PF04059	PF00076	0.00106065	0.00182537	0.99282
glyma.Wm82.gnm2.ann1.Glyma.10G214800.1	Glyma.10G214800	PF11835	PF04059	PF00076	0.00106065	0.00182537	0.99282
glyma.Wm82.gnm2.ann1.Glyma.10G214800.5	Glyma.10G214800	PF11835	PF04059	PF00076	0.00138054	0.00317135	0.989644
glyma.Wm82.gnm2.ann1.Glyma.10G214800.2	Glyma.10G214800	PF11835	PF04059	PF00076	0.00138054	0.00317135	0.989644
glyma.Wm82.gnm2.ann1.Glyma.10G214800.3	Glyma.10G214800	PF00447	PF04059	PF00076	0.00123002	0.00263864	0.990298
glyma.Wm82.gnm2.ann1.Glyma.10G214800.4	Glyma.10G214800	PF00447	PF04059	PF00076	0.00123002	0.00263864	0.990298
glyma.Wm82.gnm2.ann1.Glyma.10G242500.2	Glyma.10G242500	PF03732	PF04652	PF00615	0.131295	0.143526	0.46836
glyma.Wm82.gnm2.ann1.Glyma.10G242500.1	Glyma.10G242500	PF03732	PF04652	PF00615	0.131295	0.143526	0.46836
glyma.Wm82.gnm2.ann1.Glyma.10G144000.5	Glyma.10G144000	PF08172	PF12325	PF05008	0.202425	0.237393	0.306773
glyma.Wm82.gnm2.ann1.Glyma.10G144000.2	Glyma.10G144000	PF08172	PF12325	PF05008	0.202425	0.237393	0.306773
glyma.Wm82.gnm2.ann1.Glyma.10G144000.1	Glyma.10G144000	PF08172	PF12325	PF05008	0.202425	0.237393	0.306773
glyma.Wm82.gnm2.ann1.Glyma.10G144000.6	Glyma.10G144000	PF08172	PF12325	PF05008	0.202425	0.237393	0.306773
glyma.Wm82.gnm2.ann1.Glyma.10G144000.4	Glyma.10G144000	PF08172	PF12325	PF05008	0.250607	0.261875	0.279038
glyma.Wm82.gnm2.ann1.Glyma.10G144000.3	Glyma.10G144000	PF12325	PF09177	PF05008	0.13776	0.156736	0.524115
glyma.Wm82.gnm2.ann1.Glyma.10G291400.1	Glyma.10G291400	PF00326	PF12697	PF00561	0.0363588	0.133676	0.81974
glyma.Wm82.gnm2.ann1.Glyma.10G291400.2	Glyma.10G291400	PF00326	PF12697	PF00561	0.0177569	0.178008	0.794326
glyma.Wm82.gnm2.ann1.Glyma.10G291400.3	Glyma.10G291400	PF00326	PF12697	PF00561	0.0340005	0.263675	0.685105
glyma.Wm82.gnm2.ann1.Glyma.10G064000.1	Glyma.10G064000	PF10672	PF00107	PF00291	0.000340937	0.000500557	0.998154
glyma.Wm82.gnm2.ann1.Glyma.10G288200.1	Glyma.10G288200	PF00097	PF13086	PF00176	0.104956	0.125394	0.425209
glyma.Wm82.gnm2.ann1.Glyma.10G288200.2	Glyma.10G288200	PF00097	PF13086	PF00176	0.104956	0.125394	0.425209
glyma.Wm82.gnm2.ann1.Glyma.10G191100.1	Glyma.10G191100	PF17177	PF02878	PF14432	0.0309142	0.0408142	0.784733
glyma.Wm82.gnm2.ann1.Glyma.10G294700.1	Glyma.10G294700	PF00307	PF02854	PF07842	0.0545713	0.0769706	0.34556
glyma.Wm82.gnm2.ann1.Glyma.10G294700.2	Glyma.10G294700	PF14237	PF02854	PF07842	0.0325477	0.0494486	0.588049
glyma.Wm82.gnm2.ann1.Glyma.10G188100.1	Glyma.10G188100	PF00857	PF05116	PF02782	0.0454942	0.0802326	0.121032
glyma.Wm82.gnm2.ann1.Glyma.10G188100.2	Glyma.10G188100	PF01979	PF05116	PF02782	0.0614256	0.0674546	0.190207
glyma.Wm82.gnm2.ann1.Glyma.10G188100.3	Glyma.10G188100	PF02668	PF02782	PF05116	0.0847976	0.0919346	0.11577
glyma.Wm82.gnm2.ann1.Glyma.10G188100.4	Glyma.10G188100	PF00814	PF05116	PF02782	0.0708012	0.170747	0.201634
glyma.Wm82.gnm2.ann1.Glyma.10G188100.5	Glyma.10G188100	PF00857	PF02782	PF05116	0.0559886	0.176446	0.25417
glyma.Wm82.gnm2.ann1.Glyma.10G091900.1	Glyma.10G091900	PF07883	PF02823	PF00190	0.0727454	0.115373	0.457382
glyma.Wm82.gnm2.ann1.Glyma.10G258400.2	Glyma.10G258400	PF12348	PF04782	PF16528	0.0805133	0.143766	0.198885
glyma.Wm82.gnm2.ann1.Glyma.10G258400.1	Glyma.10G258400	PF12348	PF04782	PF16528	0.0805133	0.143766	0.198885
glyma.Wm82.gnm2.ann1.Glyma.10G258400.3	Glyma.10G258400	PF12348	PF04782	PF16528	0.0861614	0.13806	0.185524
glyma.Wm82.gnm2.ann1.Glyma.10G258400.4	Glyma.10G258400	PF12348	PF04782	PF16528	0.0861614	0.13806	0.185524
glyma.Wm82.gnm2.ann1.Glyma.10G251500.1	Glyma.10G251500	PF02737	PF00890	PF07992	0.0760087	0.110238	0.73354
glyma.Wm82.gnm2.ann1.Glyma.10G226400.1	Glyma.10G226400	PF01636	PF07714	PF00069	0.012767	0.166159	0.536289
glyma.Wm82.gnm2.ann1.Glyma.10G178300.1	Glyma.10G178300	PF02854	PF13023	PF01743	0.0507181	0.058871	0.203353
glyma.Wm82.gnm2.ann1.Glyma.10G022100.1	Glyma.10G022100	PF00171	PF00808	PF00334	0.0352847	0.037329	0.0677543
glyma.Wm82.gnm2.ann1.Glyma.10G290700.1	Glyma.10G290700	PF00175	PF00102	PF00685	0.069111	0.0700784	0.113528
glyma.Wm82.gnm2.ann1.Glyma.10G255400.1	Glyma.10G255400	PF01212	PF00266	PF00155	0.00767264	0.0605008	0.919934
glyma.Wm82.gnm2.ann1.Glyma.10G255400.2	Glyma.10G255400	PF01212	PF00266	PF00155	0.00767264	0.0605008	0.919934
glyma.Wm82.gnm2.ann1.Glyma.10G211100.1	Glyma.10G211100	PF00361	PF03798	PF07885	0.0544985	0.0644902	0.0762849
glyma.Wm82.gnm2.ann1.Glyma.10G070000.1	Glyma.10G070000	PF01399	PF00651	PF00134	0.118387	0.200095	0.284711
glyma.Wm82.gnm2.ann1.Glyma.10G030200.1	Glyma.10G030200	PF00046	PF05699	PF00010	0.0318559	0.0338048	0.0387438
glyma.Wm82.gnm2.ann1.Glyma.10G033200.1	Glyma.10G033200	PF00155	PF00361	PF00501	0.0415264	0.0467142	0.0993135
glyma.Wm82.gnm2.ann1.Glyma.10G292200.1	Glyma.10G292200	PF00117	PF01088	PF03364	0.0942835	0.115785	0.226266
glyma.Wm82.gnm2.ann1.Glyma.10G111600.1	Glyma.10G111600	PF13456	PF00271	PF07727	0.034566	0.0367695	0.0962134
glyma.Wm82.gnm2.ann1.Glyma.10G220000.1	Glyma.10G220000	PF00749	PF10551	PF01416	0.00536056	0.00899432	0.946042
glyma.Wm82.gnm2.ann1.Glyma.10G220000.2	Glyma.10G220000	PF00749	PF10551	PF01416	0.00541172	0.0159881	0.923074
glyma.Wm82.gnm2.ann1.Glyma.10G220000.5	Glyma.10G220000	PF02902	PF10551	PF01416	0.011531	0.0363417	0.876627
glyma.Wm82.gnm2.ann1.Glyma.10G220000.6	Glyma.10G220000	PF02902	PF10551	PF01416	0.0119929	0.0519071	0.8458
glyma.Wm82.gnm2.ann1.Glyma.10G220000.3	Glyma.10G220000	PF00665	PF10551	PF01416	0.0106342	0.0210622	0.929065
glyma.Wm82.gnm2.ann1.Glyma.10G220000.4	Glyma.10G220000	PF00665	PF10551	PF01416	0.0132728	0.0298977	0.907028
glyma.Wm82.gnm2.ann1.Glyma.10G220000.7	Glyma.10G220000	PF00665	PF10551	PF01416	0.0156054	0.0442679	0.885831
glyma.Wm82.gnm2.ann1.Glyma.10G220000.8	Glyma.10G220000	PF00665	PF10551	PF01416	0.0158729	0.0506313	0.881755
glyma.Wm82.gnm2.ann1.Glyma.10G220000.9	Glyma.10G220000	PF00665	PF03101	PF10551	0.0714489	0.0802394	0.114958
glyma.Wm82.gnm2.ann1.Glyma.10G220000.10	Glyma.10G220000	PF00076	PF10551	PF00665	0.0549292	0.186069	0.286657
glyma.Wm82.gnm2.ann1.Glyma.10G019700.1	Glyma.10G019700	PF00651	PF00501	PF00856	0.0512631	0.26646	0.274127
glyma.Wm82.gnm2.ann1.Glyma.10G019700.2	Glyma.10G019700	PF02906	PF03478	PF00856	0.0649833	0.0928249	0.158391
glyma.Wm82.gnm2.ann1.Glyma.10G058900.1	Glyma.10G058900	PF09763	PF10075	PF01399	0.0443783	0.151303	0.621836
glyma.Wm82.gnm2.ann1.Glyma.10G078700.1	Glyma.10G078700	PF00571	PF01909	PF00650	0.0671152	0.0707869	0.160864
glyma.Wm82.gnm2.ann1.Glyma.10G245000.1	Glyma.10G245000	PF05703	PF07557	PF13178	0.00233835	0.00910806	0.980812
glyma.Wm82.gnm2.ann1.Glyma.10G072300.1	Glyma.10G072300	PF02906	PF01058	PF00111	0.0823577	0.0978313	0.284671
glyma.Wm82.gnm2.ann1.Glyma.10G251800.1	Glyma.10G251800	PF01844	PF10497	PF00098	0.0739475	0.155232	0.342821
glyma.Wm82.gnm2.ann1.Glyma.10G209100.1	Glyma.10G209100	PF04194	PF03987	PF02338	0.00613251	0.00945745	0.94921
glyma.Wm82.gnm2.ann1.Glyma.10G209100.5	Glyma.10G209100	PF04194	PF03987	PF02338	0.00613251	0.00945745	0.94921
glyma.Wm82.gnm2.ann1.Glyma.10G209100.6	Glyma.10G209100	PF03987	PF09412	PF02338	0.000961347	0.0180892	0.972619
glyma.Wm82.gnm2.ann1.Glyma.10G209100.2	Glyma.10G209100	PF00443	PF09412	PF02338	0.00177521	0.00277122	0.983971
glyma.Wm82.gnm2.ann1.Glyma.10G209100.3	Glyma.10G209100	PF00443	PF09412	PF02338	0.00177521	0.00277122	0.983971
glyma.Wm82.gnm2.ann1.Glyma.10G209100.4	Glyma.10G209100	PF02902	PF00443	PF02338	0.000699691	0.00137024	0.991044
glyma.Wm82.gnm2.ann1.Glyma.10G209100.7	Glyma.10G209100	PF03987	PF00443	PF02338	0.0271002	0.0447948	0.814774
glyma.Wm82.gnm2.ann1.Glyma.10G209100.8	Glyma.10G209100	PF03987	PF00443	PF02338	0.0271002	0.0447948	0.814774
glyma.Wm82.gnm2.ann1.Glyma.10G209100.9	Glyma.10G209100	PF09346	PF07145	PF02338	0.0787294	0.0800176	0.277604
glyma.Wm82.gnm2.ann1.Glyma.10G209100.10	Glyma.10G209100	PF09346	PF07145	PF02338	0.0787294	0.0800176	0.277604
glyma.Wm82.gnm2.ann1.Glyma.10G093500.1	Glyma.10G093500	PF10551	PF05699	PF14372	0.0906008	0.300792	0.334021
glyma.Wm82.gnm2.ann1.Glyma.10G217700.1	Glyma.10G217700	PF00646	PF01928	PF01743	0.00152087	0.00272258	0.986338
glyma.Wm82.gnm2.ann1.Glyma.10G082300.1	Glyma.10G082300	PF00270	PF00271	PF13086	0.146761	0.197541	0.237472
glyma.Wm82.gnm2.ann1.Glyma.10G245100.1	Glyma.10G245100	PF00141	PF18266	PF02469	0.06656	0.202112	0.387777
glyma.Wm82.gnm2.ann1.Glyma.10G262600.1	Glyma.10G262600	PF07928	PF10193	PF12348	0.0518436	0.0533084	0.512428
glyma.Wm82.gnm2.ann1.Glyma.10G182100.1	Glyma.10G182100	PF01844	PF00046	PF12171	0.0689444	0.0765541	0.147169
glyma.Wm82.gnm2.ann1.Glyma.10G236100.2	Glyma.10G236100	PF16561	PF00498	PF00168	0.0695242	0.18075	0.2403
glyma.Wm82.gnm2.ann1.Glyma.10G236100.1	Glyma.10G236100	PF16561	PF00498	PF00168	0.0695242	0.18075	0.2403
glyma.Wm82.gnm2.ann1.Glyma.10G236100.3	Glyma.10G236100	PF16561	PF00498	PF00168	0.0695242	0.18075	0.2403
glyma.Wm82.gnm2.ann1.Glyma.10G049800.2	Glyma.10G049800	PF00326	PF12697	PF00561	0.0199552	0.0867834	0.87159
glyma.Wm82.gnm2.ann1.Glyma.10G049800.1	Glyma.10G049800	PF00326	PF12697	PF00561	0.0199552	0.0867834	0.87159
glyma.Wm82.gnm2.ann1.Glyma.10G100400.1	Glyma.10G100400	PF16158	PF01936	PF00564	0.0710932	0.0722628	0.119901
glyma.Wm82.gnm2.ann1.Glyma.10G183700.1	Glyma.10G183700	PF17874	PF12862	PF17177	0.0762664	0.166849	0.309337
glyma.Wm82.gnm2.ann1.Glyma.10G183700.2	Glyma.10G183700	PF17177	PF17874	PF12862	0.0786537	0.101015	0.15043
glyma.Wm82.gnm2.ann1.Glyma.10G183700.3	Glyma.10G183700	PF17177	PF17874	PF12862	0.0786537	0.101015	0.15043
glyma.Wm82.gnm2.ann1.Glyma.10G008900.1	Glyma.10G008900	PF05699	PF03732	PF01775	0.0311063	0.0867621	0.227797
glyma.Wm82.gnm2.ann1.Glyma.10G123500.1	Glyma.10G123500	PF00439	PF17855	PF00076	0.0418148	0.0596007	0.107477
glyma.Wm82.gnm2.ann1.Glyma.10G123500.2	Glyma.10G123500	PF05008	PF01145	PF01105	0.0055327	0.00845151	0.968255
glyma.Wm82.gnm2.ann1.Glyma.10G171500.1	Glyma.10G171500	PF00160	PF12656	PF00076	0.00349085	0.00541972	0.97899
glyma.Wm82.gnm2.ann1.Glyma.10G003400.1	Glyma.10G003400	PF00035	PF06911	PF05703	0.000133729	0.000133766	0.998385
glyma.Wm82.gnm2.ann1.Glyma.10G003400.2	Glyma.10G003400	PF13178	PF00035	PF05703	8.33924e-05	8.69533e-05	0.999039
glyma.Wm82.gnm2.ann1.Glyma.10G003400.3	Glyma.10G003400	PF00382	PF06911	PF05703	0.00189769	0.00225562	0.992424
glyma.Wm82.gnm2.ann1.Glyma.10G003400.4	Glyma.10G003400	PF00382	PF06911	PF05703	0.00196392	0.00229525	0.992278
glyma.Wm82.gnm2.ann1.Glyma.10G014000.1	Glyma.10G014000	PF00888	PF17874	PF00307	0.057523	0.0792228	0.11623
glyma.Wm82.gnm2.ann1.Glyma.10G018600.1	Glyma.10G018600	PF15477	PF12656	PF09405	0.0688341	0.136289	0.143726
glyma.Wm82.gnm2.ann1.Glyma.10G073500.1	Glyma.10G073500	PF03061	PF00534	PF00571	0.040795	0.0617421	0.0626504
glyma.Wm82.gnm2.ann1.Glyma.10G108600.1	Glyma.10G108600	PF00035	PF00248	PF00382	0.000491952	0.00362884	0.994602
glyma.Wm82.gnm2.ann1.Glyma.10G172200.1	Glyma.10G172200	PF08323	PF00982	PF00534	0.166549	0.309878	0.471019
glyma.Wm82.gnm2.ann1.Glyma.10G172200.2	Glyma.10G172200	PF08323	PF00982	PF00534	0.166549	0.309878	0.471019
glyma.Wm82.gnm2.ann1.Glyma.10G172200.3	Glyma.10G172200	PF01336	PF08323	PF00982	0.0980155	0.167871	0.346125
glyma.Wm82.gnm2.ann1.Glyma.10G172200.4	Glyma.10G172200	PF01416	PF00749	PF00133	0.0667162	0.0922862	0.43271
glyma.Wm82.gnm2.ann1.Glyma.10G070600.1	Glyma.10G070600	PF00188	PF01476	PF00127	0.0672741	0.148261	0.401944
glyma.Wm82.gnm2.ann1.Glyma.10G148700.1	Glyma.10G148700	PF08662	PF00646	PF00168	0.110985	0.199673	0.204556
glyma.Wm82.gnm2.ann1.Glyma.10G031600.1	Glyma.10G031600	PF07716	PF00170	PF00010	0.000424457	0.000466205	0.998779
glyma.Wm82.gnm2.ann1.Glyma.10G272800.1	Glyma.10G272800	PF03129	PF00133	PF00749	5.70891e-06	0.00107243	0.998892
glyma.Wm82.gnm2.ann1.Glyma.10G272800.2	Glyma.10G272800	PF03129	PF00133	PF00749	8.42508e-06	0.00146518	0.998498
glyma.Wm82.gnm2.ann1.Glyma.10G022500.1	Glyma.10G022500	PF02845	PF04043	PF00141	1.16043e-05	0.000135643	0.999837
glyma.Wm82.gnm2.ann1.Glyma.10G086000.1	Glyma.10G086000	PF00916	PF01061	PF00361	0.0584271	0.0691289	0.244661
glyma.Wm82.gnm2.ann1.Glyma.10G063400.1	Glyma.10G063400	PF09325	PF16740	PF07106	0.107164	0.139472	0.144054
glyma.Wm82.gnm2.ann1.Glyma.10G261300.2	Glyma.10G261300	PF00069	PF09346	PF01636	0.000785227	0.00267541	0.993878
glyma.Wm82.gnm2.ann1.Glyma.10G261300.1	Glyma.10G261300	PF00069	PF09346	PF01636	0.000785227	0.00267541	0.993878
glyma.Wm82.gnm2.ann1.Glyma.10G261300.3	Glyma.10G261300	PF13393	PF01966	PF01636	0.00651799	0.00891772	0.929702
glyma.Wm82.gnm2.ann1.Glyma.10G211600.2	Glyma.10G211600	PF00168	PF01170	PF00117	1.16765e-05	1.24224e-05	0.999947
glyma.Wm82.gnm2.ann1.Glyma.10G211600.1	Glyma.10G211600	PF00168	PF01170	PF00117	1.16765e-05	1.24224e-05	0.999947
glyma.Wm82.gnm2.ann1.Glyma.10G211600.3	Glyma.10G211600	PF13426	PF00622	PF02518	0.0874365	0.109561	0.316308
glyma.Wm82.gnm2.ann1.Glyma.10G204800.2	Glyma.10G204800	PF01370	PF13460	PF05368	0.0168642	0.0741817	0.837931
glyma.Wm82.gnm2.ann1.Glyma.10G204800.1	Glyma.10G204800	PF01370	PF13460	PF05368	0.0168642	0.0741817	0.837931
glyma.Wm82.gnm2.ann1.Glyma.10G293800.1	Glyma.10G293800	PF00275	PF00171	PF00883	0.00917469	0.0314518	0.929165
glyma.Wm82.gnm2.ann1.Glyma.10G199000.1	Glyma.10G199000	PF00578	PF00085	PF00042	0.00774342	0.0270146	0.92146
glyma.Wm82.gnm2.ann1.Glyma.10G080200.1	Glyma.10G080200	PF00717	PF00635	PF17766	0.0480607	0.0830168	0.0868398
glyma.Wm82.gnm2.ann1.Glyma.10G116700.1	Glyma.10G116700	PF17135	PF00646	PF05699	0.0330668	0.11066	0.11622
glyma.Wm82.gnm2.ann1.Glyma.10G108700.1	Glyma.10G108700	PF01397	PF04153	PF00443	0.0444074	0.0589355	0.0746074
glyma.Wm82.gnm2.ann1.Glyma.10G095000.1	Glyma.10G095000	PF00176	PF13961	PF14244	0.00670443	0.00811832	0.91071
glyma.Wm82.gnm2.ann1.Glyma.10G200400.1	Glyma.10G200400	PF08387	PF12937	PF00646	0.0230955	0.29413	0.661025
glyma.Wm82.gnm2.ann1.Glyma.10G259700.1	Glyma.10G259700	PF00069	PF05699	PF13456	0.0563731	0.0900499	0.0907122
glyma.Wm82.gnm2.ann1.Glyma.10G131800.1	Glyma.10G131800	PF14372	PF05699	PF02892	0.0244455	0.0511997	0.918636
glyma.Wm82.gnm2.ann1.Glyma.10G128600.1	Glyma.10G128600	PF00249	PF10545	PF12776	0.00813815	0.0267671	0.960528
glyma.Wm82.gnm2.ann1.Glyma.10G103300.1	Glyma.10G103300	PF00651	PF02854	PF07035	0.0328106	0.0365549	0.803085
glyma.Wm82.gnm2.ann1.Glyma.10G207700.1	Glyma.10G207700	PF07992	PF01593	PF01494	0.183019	0.188102	0.252342
glyma.Wm82.gnm2.ann1.Glyma.10G219000.1	Glyma.10G219000	PF12776	PF00505	PF05687	0.0376285	0.0536538	0.263516
glyma.Wm82.gnm2.ann1.Glyma.10G258600.1	Glyma.10G258600	PF10496	PF05699	PF04782	0.0349165	0.0373322	0.167509
glyma.Wm82.gnm2.ann1.Glyma.10G198500.1	Glyma.10G198500	PF00808	PF00010	PF00125	0.00044723	0.000785311	0.998245
glyma.Wm82.gnm2.ann1.Glyma.10G240900.1	Glyma.10G240900	PF03962	PF00010	PF00319	3.99245e-05	0.000127916	0.999506
glyma.Wm82.gnm2.ann1.Glyma.10G240900.2	Glyma.10G240900	PF01248	PF00010	PF00319	7.01248e-05	0.00012286	0.999576
glyma.Wm82.gnm2.ann1.Glyma.10G240900.3	Glyma.10G240900	PF00010	PF01248	PF00319	3.39583e-05	5.51328e-05	0.99969
glyma.Wm82.gnm2.ann1.Glyma.10G157200.1	Glyma.10G157200	PF13947	PF13472	PF00657	0.000331077	0.0915288	0.905126
glyma.Wm82.gnm2.ann1.Glyma.10G157200.4	Glyma.10G157200	PF13947	PF13472	PF00657	0.000331077	0.0915288	0.905126
glyma.Wm82.gnm2.ann1.Glyma.10G157200.3	Glyma.10G157200	PF03629	PF13472	PF00657	0.000919343	0.0987114	0.897317
glyma.Wm82.gnm2.ann1.Glyma.10G157200.2	Glyma.10G157200	PF01058	PF13472	PF00657	0.00533565	0.0801754	0.88483
glyma.Wm82.gnm2.ann1.Glyma.10G167600.1	Glyma.10G167600	PF00730	PF08511	PF04755	0.0510386	0.103112	0.277787
glyma.Wm82.gnm2.ann1.Glyma.10G175300.1	Glyma.10G175300	PF00498	PF00160	PF00622	0.0401272	0.0418643	0.146816
glyma.Wm82.gnm2.ann1.Glyma.10G175300.2	Glyma.10G175300	PF11721	PF00160	PF00622	0.0397381	0.0422038	0.153052
glyma.Wm82.gnm2.ann1.Glyma.10G175300.3	Glyma.10G175300	PF11721	PF00160	PF00622	0.0519339	0.0564562	0.176809
glyma.Wm82.gnm2.ann1.Glyma.10G175300.4	Glyma.10G175300	PF00160	PF11721	PF00622	0.0562608	0.0565985	0.198558
glyma.Wm82.gnm2.ann1.Glyma.10G175300.5	Glyma.10G175300	PF00169	PF11721	PF00622	0.0482981	0.0508247	0.190669
glyma.Wm82.gnm2.ann1.Glyma.10G175300.6	Glyma.10G175300	PF00169	PF11721	PF00622	0.0481472	0.0584536	0.204565
glyma.Wm82.gnm2.ann1.Glyma.10G175300.7	Glyma.10G175300	PF04212	PF00169	PF00622	0.0413023	0.0438235	0.173964
glyma.Wm82.gnm2.ann1.Glyma.10G175300.8	Glyma.10G175300	PF00169	PF04212	PF00622	0.0414779	0.0423543	0.19348
glyma.Wm82.gnm2.ann1.Glyma.10G104000.1	Glyma.10G104000	PF12776	PF14111	PF13966	0.120369	0.148294	0.267275
glyma.Wm82.gnm2.ann1.Glyma.10G036400.1	Glyma.10G036400	PF00270	PF01423	PF00271	0.04577	0.079098	0.0809104
glyma.Wm82.gnm2.ann1.Glyma.10G079400.1	Glyma.10G079400	PF03330	PF09430	PF03168	0.000697308	0.00380556	0.991837
glyma.Wm82.gnm2.ann1.Glyma.10G065200.1	Glyma.10G065200	PF01636	PF07714	PF00069	8.2544e-05	0.0511735	0.948691
glyma.Wm82.gnm2.ann1.Glyma.10G217600.1	Glyma.10G217600	PF13905	PF00578	PF00085	0.00330068	0.0097797	0.985518
glyma.Wm82.gnm2.ann1.Glyma.10G195400.1	Glyma.10G195400	PF12678	PF00097	PF13639	0.063493	0.0916758	0.827523
glyma.Wm82.gnm2.ann1.Glyma.10G280200.1	Glyma.10G280200	PF00188	PF00754	PF00059	0.0795818	0.182519	0.308223
glyma.Wm82.gnm2.ann1.Glyma.10G233900.1	Glyma.10G233900	PF00505	PF00252	PF00327	0.104574	0.139959	0.235024
glyma.Wm82.gnm2.ann1.Glyma.10G270500.1	Glyma.10G270500	PF00139	PF00754	PF00168	0.0357958	0.123852	0.552357
glyma.Wm82.gnm2.ann1.Glyma.10G044000.1	Glyma.10G044000	PF01029	PF00651	PF05699	0.0464999	0.048205	0.0961305
glyma.Wm82.gnm2.ann1.Glyma.10G044000.2	Glyma.10G044000	PF00076	PF01029	PF05699	0.0312619	0.0468502	0.0799725
glyma.Wm82.gnm2.ann1.Glyma.10G210700.1	Glyma.10G210700	PF01168	PF02784	PF02878	1.09415e-05	2.31638e-05	0.999899
glyma.Wm82.gnm2.ann1.Glyma.10G210700.3	Glyma.10G210700	PF00155	PF00291	PF02878	0.00235467	0.00959074	0.982808
glyma.Wm82.gnm2.ann1.Glyma.10G210700.2	Glyma.10G210700	PF00128	PF13393	PF02878	0.000334553	0.000340256	0.998969
glyma.Wm82.gnm2.ann1.Glyma.10G262900.1	Glyma.10G262900	PF00361	PF00892	PF00999	0.111511	0.119228	0.404025
glyma.Wm82.gnm2.ann1.Glyma.10G262900.2	Glyma.10G262900	PF01699	PF00892	PF00999	0.177622	0.181969	0.30832
glyma.Wm82.gnm2.ann1.Glyma.10G090200.1	Glyma.10G090200	PF07727	PF14372	PF02892	0.0263229	0.042038	0.862934
glyma.Wm82.gnm2.ann1.Glyma.10G279200.1	Glyma.10G279200	PF07885	PF14360	PF03798	0.0321079	0.0329184	0.783522
glyma.Wm82.gnm2.ann1.Glyma.10G157100.1	Glyma.10G157100	PF01471	PF00497	PF04536	0.00290388	0.137094	0.850068
glyma.Wm82.gnm2.ann1.Glyma.10G285400.1	Glyma.10G285400	PF07885	PF07884	PF00361	0.0514722	0.077757	0.210817
glyma.Wm82.gnm2.ann1.Glyma.10G208400.1	Glyma.10G208400	PF01775	PF00307	PF06839	0.0498333	0.0682426	0.0890772
glyma.Wm82.gnm2.ann1.Glyma.10G231000.1	Glyma.10G231000	PF13088	PF12708	PF00089	0.0709159	0.170558	0.31621
glyma.Wm82.gnm2.ann1.Glyma.10G136500.1	Glyma.10G136500	PF00361	PF07885	PF08510	0.0709083	0.0885953	0.182557
glyma.Wm82.gnm2.ann1.Glyma.10G268700.5	Glyma.10G268700	PF03171	PF13640	PF00646	0.0673033	0.239084	0.291697
glyma.Wm82.gnm2.ann1.Glyma.10G268700.1	Glyma.10G268700	PF03171	PF13640	PF00646	0.0673033	0.239084	0.291697
glyma.Wm82.gnm2.ann1.Glyma.10G268700.9	Glyma.10G268700	PF03171	PF13640	PF00646	0.0673033	0.239084	0.291697
glyma.Wm82.gnm2.ann1.Glyma.10G268700.8	Glyma.10G268700	PF03171	PF13640	PF00646	0.0895985	0.260287	0.309051
glyma.Wm82.gnm2.ann1.Glyma.10G268700.6	Glyma.10G268700	PF03171	PF13640	PF00646	0.0895985	0.260287	0.309051
glyma.Wm82.gnm2.ann1.Glyma.10G268700.4	Glyma.10G268700	PF03171	PF13640	PF00646	0.0895985	0.260287	0.309051
glyma.Wm82.gnm2.ann1.Glyma.10G268700.2	Glyma.10G268700	PF12937	PF13640	PF00646	0.0568532	0.145455	0.491888
glyma.Wm82.gnm2.ann1.Glyma.10G268700.7	Glyma.10G268700	PF12937	PF13640	PF00646	0.0568532	0.145455	0.491888
glyma.Wm82.gnm2.ann1.Glyma.10G268700.3	Glyma.10G268700	PF12937	PF13640	PF00646	0.0568532	0.145455	0.491888
glyma.Wm82.gnm2.ann1.Glyma.10G036800.1	Glyma.10G036800	PF00361	PF00909	PF06813	0.0914037	0.178912	0.407923
glyma.Wm82.gnm2.ann1.Glyma.10G229700.1	Glyma.10G229700	PF03941	PF06886	PF12214	0.0417067	0.159669	0.419299
glyma.Wm82.gnm2.ann1.Glyma.10G041100.1	Glyma.10G041100	PF00108	PF08541	PF00109	0.000127888	0.000238069	0.999033
glyma.Wm82.gnm2.ann1.Glyma.10G027800.1	Glyma.10G027800	PF00011	PF05627	PF05678	0.0338161	0.180344	0.27521
glyma.Wm82.gnm2.ann1.Glyma.10G094100.1	Glyma.10G094100	PF12894	PF00651	PF12657	0.00475853	0.00800967	0.952836
glyma.Wm82.gnm2.ann1.Glyma.10G199600.1	Glyma.10G199600	PF00010	PF07716	PF04419	0.108447	0.15079	0.191217
glyma.Wm82.gnm2.ann1.Glyma.10G269800.1	Glyma.10G269800	PF00909	PF00361	PF13906	0.0740632	0.0756259	0.54015
glyma.Wm82.gnm2.ann1.Glyma.10G127900.1	Glyma.10G127900	PF07647	PF02893	PF09734	0.0586731	0.0811341	0.123686
glyma.Wm82.gnm2.ann1.Glyma.10G184100.1	Glyma.10G184100	PF02453	PF07885	PF05529	0.0374554	0.0379478	0.0404513
glyma.Wm82.gnm2.ann1.Glyma.10G192400.1	Glyma.10G192400	PF14498	PF03200	PF12215	0.000450772	0.00135127	0.99751
glyma.Wm82.gnm2.ann1.Glyma.10G291600.1	Glyma.10G291600	PF00576	PF00646	PF00361	0.0249865	0.0383079	0.117038
glyma.Wm82.gnm2.ann1.Glyma.10G018700.1	Glyma.10G018700	PF00588	PF02698	PF00582	1.61334e-05	1.87553e-05	0.999906
glyma.Wm82.gnm2.ann1.Glyma.10G018700.2	Glyma.10G018700	PF00588	PF02698	PF00582	7.73073e-06	1.79619e-05	0.999953
glyma.Wm82.gnm2.ann1.Glyma.10G112900.1	Glyma.10G112900	PF11708	PF12171	PF17780	0.0922303	0.156672	0.727465
glyma.Wm82.gnm2.ann1.Glyma.10G178800.1	Glyma.10G178800	PF00176	PF02441	PF00931	0.0740667	0.074553	0.232977
glyma.Wm82.gnm2.ann1.Glyma.10G043800.1	Glyma.10G043800	PF05617	PF00234	PF14368	0.0646297	0.174824	0.297538
glyma.Wm82.gnm2.ann1.Glyma.10G035800.1	Glyma.10G035800	PF00581	PF00487	PF00615	0.0562861	0.0618114	0.0635882
glyma.Wm82.gnm2.ann1.Glyma.10G240400.1	Glyma.10G240400	PF00644	PF13532	PF13640	0.0481286	0.0913677	0.832654
glyma.Wm82.gnm2.ann1.Glyma.10G026300.1	Glyma.10G026300	PF16455	PF01521	PF06094	0.052367	0.117102	0.198398
glyma.Wm82.gnm2.ann1.Glyma.10G174700.1	Glyma.10G174700	PF13180	PF00169	PF00168	0.0360736	0.14277	0.628833
glyma.Wm82.gnm2.ann1.Glyma.10G174700.3	Glyma.10G174700	PF13180	PF00169	PF00168	0.0360736	0.14277	0.628833
glyma.Wm82.gnm2.ann1.Glyma.10G174700.4	Glyma.10G174700	PF05641	PF00169	PF00168	0.0707978	0.299163	0.325321
glyma.Wm82.gnm2.ann1.Glyma.10G174700.5	Glyma.10G174700	PF00169	PF05641	PF00168	0.11836	0.127388	0.511165
glyma.Wm82.gnm2.ann1.Glyma.10G174700.2	Glyma.10G174700	PF00855	PF00168	PF00169	0.0996915	0.17122	0.175754
glyma.Wm82.gnm2.ann1.Glyma.10G174700.6	Glyma.10G174700	PF00754	PF00169	PF00168	0.040253	0.101326	0.482813
glyma.Wm82.gnm2.ann1.Glyma.10G028500.1	Glyma.10G028500	PF13966	PF13976	PF00646	0.0431075	0.0586759	0.0731229
glyma.Wm82.gnm2.ann1.Glyma.10G255800.1	Glyma.10G255800	PF02320	PF04043	PF05617	0.0917742	0.0920424	0.138972
glyma.Wm82.gnm2.ann1.Glyma.10G071500.1	Glyma.10G071500	PF00326	PF12697	PF00561	0.017405	0.0863662	0.873947
glyma.Wm82.gnm2.ann1.Glyma.10G086800.3	Glyma.10G086800	PF02463	PF01926	PF00005	0.00107815	0.0104437	0.985744
glyma.Wm82.gnm2.ann1.Glyma.10G086800.1	Glyma.10G086800	PF02463	PF01926	PF00005	0.00107815	0.0104437	0.985744
glyma.Wm82.gnm2.ann1.Glyma.10G086800.2	Glyma.10G086800	PF02223	PF01061	PF00005	0.00782241	0.0257757	0.953389
glyma.Wm82.gnm2.ann1.Glyma.10G256200.1	Glyma.10G256200	PF05699	PF10075	PF00134	0.00103659	0.00329557	0.992282
glyma.Wm82.gnm2.ann1.Glyma.10G028000.1	Glyma.10G028000	PF12937	PF03478	PF00646	0.0834978	0.262223	0.568831
glyma.Wm82.gnm2.ann1.Glyma.10G160400.1	Glyma.10G160400	PF00249	PF07714	PF00069	0.000130975	0.0240747	0.975663
glyma.Wm82.gnm2.ann1.Glyma.10G016800.1	Glyma.10G016800	PF00550	PF00582	PF00571	0.0553802	0.116097	0.138331
glyma.Wm82.gnm2.ann1.Glyma.10G162300.1	Glyma.10G162300	PF00170	PF14379	PF00010	0.00214999	0.00243491	0.986523
glyma.Wm82.gnm2.ann1.Glyma.10G162300.2	Glyma.10G162300	PF14379	PF00125	PF00010	0.000899839	0.00120055	0.993617
glyma.Wm82.gnm2.ann1.Glyma.10G236800.1	Glyma.10G236800	PF12796	PF00636	PF00271	0.0697834	0.0927298	0.112966
glyma.Wm82.gnm2.ann1.Glyma.10G046000.1	Glyma.10G046000	PF05699	PF14372	PF01399	0.125207	0.169107	0.196573
glyma.Wm82.gnm2.ann1.Glyma.10G005500.1	Glyma.10G005500	PF00724	PF01645	PF03460	0.0533615	0.173768	0.281415
glyma.Wm82.gnm2.ann1.Glyma.10G267300.1	Glyma.10G267300	PF00999	PF13906	PF00361	0.14526	0.167118	0.329828
glyma.Wm82.gnm2.ann1.Glyma.10G009300.1	Glyma.10G009300	PF02893	PF00168	PF00102	0.0434197	0.0490337	0.0528349
glyma.Wm82.gnm2.ann1.Glyma.10G212400.1	Glyma.10G212400	PF10520	PF00487	PF09402	0.0793427	0.110945	0.114693
glyma.Wm82.gnm2.ann1.Glyma.10G039800.1	Glyma.10G039800	PF03101	PF01775	PF06839	0.0593296	0.0848746	0.100224
glyma.Wm82.gnm2.ann1.Glyma.10G265200.1	Glyma.10G265200	PF05047	PF00141	PF06839	0.0904996	0.0951089	0.103697
glyma.Wm82.gnm2.ann1.Glyma.10G046600.1	Glyma.10G046600	PF00955	PF08627	PF06454	0.0514325	0.0680472	0.590834
glyma.Wm82.gnm2.ann1.Glyma.10G099500.1	Glyma.10G099500	PF10419	PF00011	PF13867	0.0569027	0.0804163	0.261434
glyma.Wm82.gnm2.ann1.Glyma.10G123000.1	Glyma.10G123000	PF13532	PF14226	PF03171	0.00021477	0.0033752	0.996276
glyma.Wm82.gnm2.ann1.Glyma.10G047000.1	Glyma.10G047000	PF00059	PF00182	PF00188	0.00372394	0.00676032	0.985117
glyma.Wm82.gnm2.ann1.Glyma.10G273800.1	Glyma.10G273800	PF02892	PF00098	PF12171	0.0350262	0.183368	0.534548
glyma.Wm82.gnm2.ann1.Glyma.10G086200.1	Glyma.10G086200	PF00010	PF07716	PF00319	2.28695e-05	3.8686e-05	0.999868
glyma.Wm82.gnm2.ann1.Glyma.10G185200.1	Glyma.10G185200	PF02223	PF00485	PF06414	0.00447669	0.00787562	0.963654
glyma.Wm82.gnm2.ann1.Glyma.10G284400.1	Glyma.10G284400	PF00454	PF07714	PF00069	6.00604e-05	0.0173147	0.982603
glyma.Wm82.gnm2.ann1.Glyma.10G284400.2	Glyma.10G284400	PF00454	PF07714	PF00069	6.00604e-05	0.0173147	0.982603
glyma.Wm82.gnm2.ann1.Glyma.10G284400.3	Glyma.10G284400	PF00454	PF07714	PF00069	4.74047e-05	0.0209405	0.978991
glyma.Wm82.gnm2.ann1.Glyma.10G275500.1	Glyma.10G275500	PF00031	PF00171	PF03732	0.0256876	0.0278204	0.0481247
glyma.Wm82.gnm2.ann1.Glyma.10G046100.1	Glyma.10G046100	PF10313	PF12708	PF03478	0.107992	0.113886	0.274898
glyma.Wm82.gnm2.ann1.Glyma.10G214400.1	Glyma.10G214400	PF00248	PF02469	PF00631	0.0317433	0.0548168	0.104025
glyma.Wm82.gnm2.ann1.Glyma.10G069200.1	Glyma.10G069200	PF00252	PF03501	PF00327	0.105222	0.142252	0.390393
glyma.Wm82.gnm2.ann1.Glyma.10G089900.1	Glyma.10G089900	PF00582	PF00027	PF00999	0.0224292	0.169437	0.739229
glyma.Wm82.gnm2.ann1.Glyma.10G124900.1	Glyma.10G124900	PF08766	PF00076	PF18036	0.0712511	0.0940775	0.110279
glyma.Wm82.gnm2.ann1.Glyma.10G025200.1	Glyma.10G025200	PF05617	PF14368	PF00234	0.212115	0.315966	0.376205
glyma.Wm82.gnm2.ann1.Glyma.10G219500.1	Glyma.10G219500	PF00160	PF00447	PF00076	0.000336554	0.000479326	0.997852
glyma.Wm82.gnm2.ann1.Glyma.10G219500.2	Glyma.10G219500	PF00160	PF00447	PF00076	0.000320327	0.000463003	0.997982
glyma.Wm82.gnm2.ann1.Glyma.10G050600.1	Glyma.10G050600	PF00080	PF00160	PF00141	0.04459	0.0784691	0.10157
glyma.Wm82.gnm2.ann1.Glyma.10G097500.1	Glyma.10G097500	PF13178	PF13891	PF05703	0.0444017	0.0787856	0.143017
glyma.Wm82.gnm2.ann1.Glyma.10G179900.1	Glyma.10G179900	PF01841	PF00150	PF02836	0.0821509	0.109706	0.11887
glyma.Wm82.gnm2.ann1.Glyma.10G054200.1	Glyma.10G054200	PF13947	PF00622	PF01095	0.0922588	0.123863	0.164348
glyma.Wm82.gnm2.ann1.Glyma.10G147300.1	Glyma.10G147300	PF07647	PF03828	PF10469	0.0493823	0.0497168	0.0547373
glyma.Wm82.gnm2.ann1.Glyma.10G151700.1	Glyma.10G151700	PF14244	PF13966	PF13456	0.0492514	0.265666	0.419752
glyma.Wm82.gnm2.ann1.Glyma.10G204400.1	Glyma.10G204400	PF11926	PF00855	PF02362	0.00624286	0.00759884	0.97422
glyma.Wm82.gnm2.ann1.Glyma.10G063100.1	Glyma.10G063100	PF00892	PF13906	PF00361	0.049999	0.0658324	0.697803
glyma.Wm82.gnm2.ann1.Glyma.10G089300.1	Glyma.10G089300	PF06916	PF04043	PF05703	0.0972598	0.124922	0.140148
glyma.Wm82.gnm2.ann1.Glyma.10G196100.1	Glyma.10G196100	PF06148	PF00888	PF09763	0.0868238	0.180385	0.541893
glyma.Wm82.gnm2.ann1.Glyma.10G196100.2	Glyma.10G196100	PF06148	PF00888	PF09763	0.100665	0.175115	0.468195
glyma.Wm82.gnm2.ann1.Glyma.10G109500.1	Glyma.10G109500	PF00999	PF00916	PF13906	0.0564159	0.0646344	0.513087
glyma.Wm82.gnm2.ann1.Glyma.10G109500.2	Glyma.10G109500	PF00999	PF00916	PF13906	0.0564159	0.0646344	0.513087
glyma.Wm82.gnm2.ann1.Glyma.10G109500.7	Glyma.10G109500	PF00999	PF00916	PF13906	0.0564159	0.0646344	0.513087
glyma.Wm82.gnm2.ann1.Glyma.10G109500.3	Glyma.10G109500	PF00999	PF00916	PF13906	0.0564159	0.0646344	0.513087
glyma.Wm82.gnm2.ann1.Glyma.10G109500.4	Glyma.10G109500	PF08627	PF01699	PF13906	0.0441638	0.106316	0.492154
glyma.Wm82.gnm2.ann1.Glyma.10G109500.5	Glyma.10G109500	PF08627	PF01699	PF13906	0.0441638	0.106316	0.492154
glyma.Wm82.gnm2.ann1.Glyma.10G109500.6	Glyma.10G109500	PF08627	PF01699	PF13906	0.0441638	0.106316	0.492154
glyma.Wm82.gnm2.ann1.Glyma.10G021000.1	Glyma.10G021000	PF01323	PF00085	PF00462	0.000695898	0.00707398	0.988814
glyma.Wm82.gnm2.ann1.Glyma.10G146900.1	Glyma.10G146900	PF08161	PF12717	PF12719	0.105323	0.156291	0.214217
glyma.Wm82.gnm2.ann1.Glyma.10G146900.2	Glyma.10G146900	PF08161	PF12717	PF12719	0.109786	0.13922	0.2176
glyma.Wm82.gnm2.ann1.Glyma.10G146900.3	Glyma.10G146900	PF08161	PF12717	PF12719	0.0943771	0.126452	0.266403
glyma.Wm82.gnm2.ann1.Glyma.10G146900.4	Glyma.10G146900	PF08161	PF12717	PF12719	0.10514	0.126809	0.265166
glyma.Wm82.gnm2.ann1.Glyma.10G146900.5	Glyma.10G146900	PF12717	PF08389	PF02854	0.072543	0.0775818	0.118455
glyma.Wm82.gnm2.ann1.Glyma.10G218600.1	Glyma.10G218600	PF00754	PF00168	PF08662	0.054495	0.05712	0.0591109
glyma.Wm82.gnm2.ann1.Glyma.10G014800.2	Glyma.10G014800	PF02845	PF00631	PF00010	0.177312	0.184828	0.192984
glyma.Wm82.gnm2.ann1.Glyma.10G014800.1	Glyma.10G014800	PF02845	PF00631	PF00010	0.177312	0.184828	0.192984
glyma.Wm82.gnm2.ann1.Glyma.10G014800.3	Glyma.10G014800	PF02845	PF00631	PF00010	0.177312	0.184828	0.192984
glyma.Wm82.gnm2.ann1.Glyma.10G228500.1	Glyma.10G228500	PF05004	PF01937	PF01753	0.055343	0.121064	0.18164
glyma.Wm82.gnm2.ann1.Glyma.10G041800.1	Glyma.10G041800	PF00890	PF00732	PF07992	0.0452008	0.0454794	0.747997
glyma.Wm82.gnm2.ann1.Glyma.10G182000.2	Glyma.10G182000	PF05699	PF00168	PF14309	0.0420771	0.0658126	0.0891911
glyma.Wm82.gnm2.ann1.Glyma.10G182000.3	Glyma.10G182000	PF05699	PF00168	PF14309	0.0420771	0.0658126	0.0891911
glyma.Wm82.gnm2.ann1.Glyma.10G182000.1	Glyma.10G182000	PF05699	PF00168	PF14309	0.0420771	0.0658126	0.0891911
glyma.Wm82.gnm2.ann1.Glyma.10G182000.4	Glyma.10G182000	PF05699	PF00168	PF14309	0.0420771	0.0658126	0.0891911
glyma.Wm82.gnm2.ann1.Glyma.10G182000.5	Glyma.10G182000	PF05699	PF00168	PF14309	0.0420771	0.0658126	0.0891911
glyma.Wm82.gnm2.ann1.Glyma.10G182000.6	Glyma.10G182000	PF00439	PF02902	PF09133	0.0467526	0.0612076	0.0683065
glyma.Wm82.gnm2.ann1.Glyma.10G182000.7	Glyma.10G182000	PF00439	PF02902	PF09133	0.0467527	0.0612076	0.0683065
glyma.Wm82.gnm2.ann1.Glyma.10G182000.8	Glyma.10G182000	PF00439	PF02902	PF09133	0.0457597	0.0613467	0.0667105
glyma.Wm82.gnm2.ann1.Glyma.10G104200.1	Glyma.10G104200	PF00931	PF00004	PF00582	0.0776295	0.080901	0.143911
glyma.Wm82.gnm2.ann1.Glyma.10G182500.1	Glyma.10G182500	PF00472	PF01765	PF05670	0.0862911	0.107489	0.258725
glyma.Wm82.gnm2.ann1.Glyma.10G185400.1	Glyma.10G185400	PF00125	PF00076	PF04280	0.0751624	0.09531	0.0965662
glyma.Wm82.gnm2.ann1.Glyma.10G109700.1	Glyma.10G109700	PF02229	PF05486	PF00168	0.0497698	0.0618243	0.265784
glyma.Wm82.gnm2.ann1.Glyma.10G068500.1	Glyma.10G068500	PF08718	PF13456	PF00307	0.0267473	0.0457086	0.532149
glyma.Wm82.gnm2.ann1.Glyma.10G000200.1	Glyma.10G000200	PF00271	PF00004	PF13086	0.00378353	0.0135574	0.967246
glyma.Wm82.gnm2.ann1.Glyma.10G050200.1	Glyma.10G050200	PF01248	PF12348	PF01661	0.0912076	0.100417	0.104038
glyma.Wm82.gnm2.ann1.Glyma.10G178100.1	Glyma.10G178100	PF02845	PF14661	PF08492	0.0935188	0.209095	0.328315
glyma.Wm82.gnm2.ann1.Glyma.10G132300.1	Glyma.10G132300	PF00892	PF00361	PF00909	0.015016	0.0179513	0.940239
glyma.Wm82.gnm2.ann1.Glyma.10G231400.1	Glyma.10G231400	PF00651	PF00443	PF00076	0.0419304	0.0517707	0.114054
glyma.Wm82.gnm2.ann1.Glyma.10G284500.1	Glyma.10G284500	PF00439	PF00855	PF10497	0.0260047	0.0300812	0.896361
glyma.Wm82.gnm2.ann1.Glyma.10G163200.1	Glyma.10G163200	PF01636	PF07714	PF00069	2.91616e-05	0.0179983	0.981939
glyma.Wm82.gnm2.ann1.Glyma.10G295600.1	Glyma.10G295600	PF04321	PF05368	PF13460	0.0911854	0.0988887	0.23869
glyma.Wm82.gnm2.ann1.Glyma.10G004500.2	Glyma.10G004500	PF10440	PF04825	PF15862	0.0345472	0.0353603	0.12121
glyma.Wm82.gnm2.ann1.Glyma.10G004500.1	Glyma.10G004500	PF10440	PF04825	PF15862	0.0345472	0.0353603	0.12121
glyma.Wm82.gnm2.ann1.Glyma.10G171100.1	Glyma.10G171100	PF00644	PF03101	PF13867	0.041416	0.103105	0.110894
glyma.Wm82.gnm2.ann1.Glyma.10G211300.1	Glyma.10G211300	PF00890	PF01494	PF01734	0.00177031	0.0430032	0.947925
glyma.Wm82.gnm2.ann1.Glyma.10G018000.1	Glyma.10G018000	PF00892	PF00909	PF01699	0.000439259	0.000741638	0.99743
glyma.Wm82.gnm2.ann1.Glyma.10G018000.2	Glyma.10G018000	PF07885	PF00689	PF01699	0.000914238	0.00140437	0.991889
glyma.Wm82.gnm2.ann1.Glyma.10G246400.1	Glyma.10G246400	PF00635	PF00160	PF00190	0.0504679	0.0508863	0.0759925
glyma.Wm82.gnm2.ann1.Glyma.10G004000.1	Glyma.10G004000	PF02037	PF02892	PF12171	0.0684439	0.172782	0.279517
glyma.Wm82.gnm2.ann1.Glyma.10G040600.1	Glyma.10G040600	PF02941	PF01521	PF00578	0.0657078	0.115115	0.130509
glyma.Wm82.gnm2.ann1.Glyma.10G240600.2	Glyma.10G240600	PF10650	PF14383	PF14309	0.0383683	0.292993	0.55014
glyma.Wm82.gnm2.ann1.Glyma.10G240600.1	Glyma.10G240600	PF10650	PF14383	PF14309	0.0383683	0.292993	0.55014
glyma.Wm82.gnm2.ann1.Glyma.10G007600.1	Glyma.10G007600	PF02140	PF00234	PF14368	0.0697324	0.333729	0.387551
glyma.Wm82.gnm2.ann1.Glyma.10G139700.1	Glyma.10G139700	PF00160	PF07883	PF00190	7.41324e-05	0.03906	0.960476
glyma.Wm82.gnm2.ann1.Glyma.10G084200.1	Glyma.10G084200	PF07839	PF12214	PF06886	0.0672176	0.0884738	0.709815
glyma.Wm82.gnm2.ann1.Glyma.10G066200.1	Glyma.10G066200	PF01416	PF01467	PF01509	0.0580461	0.0722554	0.592823
glyma.Wm82.gnm2.ann1.Glyma.10G060000.1	Glyma.10G060000	PF00069	PF14215	PF00622	0.113103	0.120063	0.189226
glyma.Wm82.gnm2.ann1.Glyma.10G021900.1	Glyma.10G021900	PF00046	PF00076	PF12171	0.0577706	0.085403	0.418627
glyma.Wm82.gnm2.ann1.Glyma.10G021900.3	Glyma.10G021900	PF00046	PF00076	PF12171	0.0578171	0.0856673	0.41928
glyma.Wm82.gnm2.ann1.Glyma.10G021900.2	Glyma.10G021900	PF00046	PF00076	PF12171	0.0578171	0.0856673	0.41928
glyma.Wm82.gnm2.ann1.Glyma.10G021900.4	Glyma.10G021900	PF00046	PF00076	PF12171	0.057817	0.0856672	0.41928
glyma.Wm82.gnm2.ann1.Glyma.10G244400.1	Glyma.10G244400	PF00472	PF01138	PF00635	0.0704533	0.0932797	0.114844
glyma.Wm82.gnm2.ann1.Glyma.10G244400.2	Glyma.10G244400	PF13891	PF00472	PF00635	0.0749677	0.0808559	0.112944
glyma.Wm82.gnm2.ann1.Glyma.10G244400.3	Glyma.10G244400	PF00472	PF00635	PF01138	0.107249	0.115014	0.116832
glyma.Wm82.gnm2.ann1.Glyma.10G244400.4	Glyma.10G244400	PF13891	PF00635	PF00472	0.0886167	0.110543	0.136694
glyma.Wm82.gnm2.ann1.Glyma.10G103200.1	Glyma.10G103200	PF01095	PF00754	PF12708	0.083295	0.110163	0.138261
glyma.Wm82.gnm2.ann1.Glyma.10G192600.1	Glyma.10G192600	PF04774	PF13266	PF05678	0.100881	0.177028	0.361009
glyma.Wm82.gnm2.ann1.Glyma.10G192600.2	Glyma.10G192600	PF04774	PF13266	PF05678	0.101871	0.179292	0.369482
glyma.Wm82.gnm2.ann1.Glyma.10G084400.1	Glyma.10G084400	PF05641	PF03364	PF00407	0.000746744	0.00281533	0.988112
glyma.Wm82.gnm2.ann1.Glyma.10G050100.1	Glyma.10G050100	PF00685	PF13579	PF00534	0.130111	0.179463	0.210631
glyma.Wm82.gnm2.ann1.Glyma.10G007100.1	Glyma.10G007100	PF07727	PF05686	PF00644	0.0318847	0.043293	0.0914814
glyma.Wm82.gnm2.ann1.Glyma.10G181800.1	Glyma.10G181800	PF00567	PF00646	PF17958	0.000672364	0.00123519	0.995784
glyma.Wm82.gnm2.ann1.Glyma.10G181800.2	Glyma.10G181800	PF01636	PF00646	PF17958	0.00135378	0.00352249	0.982605
glyma.Wm82.gnm2.ann1.Glyma.10G181800.3	Glyma.10G181800	PF01636	PF00646	PF17958	0.00135378	0.00352249	0.982605
glyma.Wm82.gnm2.ann1.Glyma.10G250200.1	Glyma.10G250200	PF00326	PF07859	PF00135	0.0262815	0.216675	0.751011
glyma.Wm82.gnm2.ann1.Glyma.10G197600.1	Glyma.10G197600	PF00128	PF00413	PF14237	0.0458783	0.105493	0.109272
glyma.Wm82.gnm2.ann1.Glyma.10G197600.2	Glyma.10G197600	PF10536	PF03441	PF12776	0.132831	0.140697	0.180897
glyma.Wm82.gnm2.ann1.Glyma.10G197600.3	Glyma.10G197600	PF10536	PF03441	PF12776	0.132831	0.140697	0.180897
glyma.Wm82.gnm2.ann1.Glyma.10G079000.1	Glyma.10G079000	PF00076	PF07724	PF02861	0.00482421	0.0977419	0.868997
glyma.Wm82.gnm2.ann1.Glyma.10G213100.1	Glyma.10G213100	PF00188	PF05703	PF13178	0.0442955	0.19662	0.570963
glyma.Wm82.gnm2.ann1.Glyma.10G213100.2	Glyma.10G213100	PF00249	PF00188	PF13178	0.121674	0.150504	0.289699
glyma.Wm82.gnm2.ann1.Glyma.10G213100.3	Glyma.10G213100	PF00188	PF13178	PF00249	0.141265	0.164354	0.176357
glyma.Wm82.gnm2.ann1.Glyma.10G213100.4	Glyma.10G213100	PF00188	PF13178	PF00249	0.141265	0.164354	0.176357
glyma.Wm82.gnm2.ann1.Glyma.10G165000.1	Glyma.10G165000	PF04851	PF13086	PF00176	0.114952	0.192	0.445266
glyma.Wm82.gnm2.ann1.Glyma.10G124500.1	Glyma.10G124500	PF12776	PF00249	PF02201	0.038805	0.0614117	0.0707001
glyma.Wm82.gnm2.ann1.Glyma.10G126700.1	Glyma.10G126700	PF01636	PF07714	PF00069	0.000514266	0.0442702	0.954856
glyma.Wm82.gnm2.ann1.Glyma.10G126700.2	Glyma.10G126700	PF01636	PF07714	PF00069	0.000514266	0.0442702	0.954856
glyma.Wm82.gnm2.ann1.Glyma.10G126700.3	Glyma.10G126700	PF01636	PF07714	PF00069	0.000146153	0.0376772	0.961598
glyma.Wm82.gnm2.ann1.Glyma.10G226800.1	Glyma.10G226800	PF07859	PF00326	PF00135	0.0694542	0.166808	0.202201
glyma.Wm82.gnm2.ann1.Glyma.10G186600.1	Glyma.10G186600	PF03372	PF00128	PF00149	0.00019293	0.000220707	0.999137
glyma.Wm82.gnm2.ann1.Glyma.10G186600.2	Glyma.10G186600	PF03372	PF00128	PF00149	0.000103472	0.000306822	0.999206
glyma.Wm82.gnm2.ann1.Glyma.10G186600.3	Glyma.10G186600	PF03372	PF00128	PF00149	0.000103472	0.000306822	0.999206
glyma.Wm82.gnm2.ann1.Glyma.10G186600.4	Glyma.10G186600	PF00657	PF03372	PF00149	0.000710941	0.00112064	0.995922
glyma.Wm82.gnm2.ann1.Glyma.10G131600.1	Glyma.10G131600	PF00443	PF00210	PF01627	0.034657	0.066218	0.0733305
glyma.Wm82.gnm2.ann1.Glyma.10G097200.1	Glyma.10G097200	PF00168	PF01423	PF01336	0.0694207	0.0888555	0.100436
glyma.Wm82.gnm2.ann1.Glyma.10G284000.1	Glyma.10G284000	PF00646	PF03478	PF08662	0.0887677	0.142574	0.347581
glyma.Wm82.gnm2.ann1.Glyma.10G284000.2	Glyma.10G284000	PF00646	PF03478	PF08662	0.136974	0.137835	0.210319
glyma.Wm82.gnm2.ann1.Glyma.10G284000.3	Glyma.10G284000	PF12894	PF10313	PF08662	0.114978	0.159804	0.380681
glyma.Wm82.gnm2.ann1.Glyma.10G284000.4	Glyma.10G284000	PF10313	PF12894	PF08662	0.123445	0.139038	0.394208
glyma.Wm82.gnm2.ann1.Glyma.10G222600.1	Glyma.10G222600	PF00089	PF07714	PF00069	1.62136e-05	0.0207006	0.979261
glyma.Wm82.gnm2.ann1.Glyma.10G260600.1	Glyma.10G260600	PF01844	PF12171	PF02892	0.0459702	0.346372	0.443496
glyma.Wm82.gnm2.ann1.Glyma.10G043100.1	Glyma.10G043100	PF00182	PF01471	PF13441	0.0602432	0.170597	0.185206
glyma.Wm82.gnm2.ann1.Glyma.10G012600.1	Glyma.10G012600	PF00188	PF02338	PF00856	0.000415591	0.000461753	0.998445
glyma.Wm82.gnm2.ann1.Glyma.10G012600.2	Glyma.10G012600	PF02338	PF00188	PF00856	0.000462811	0.00046305	0.998384
glyma.Wm82.gnm2.ann1.Glyma.10G012600.3	Glyma.10G012600	PF02338	PF00188	PF00856	0.000380324	0.00040921	0.998539
glyma.Wm82.gnm2.ann1.Glyma.10G190900.1	Glyma.10G190900	PF00188	PF12999	PF03330	0.0035388	0.00684773	0.980124
[truncated: 88,983 more rows]

## Sheet: a4
Supplemental Table S3 - PF-NET predictions for the entire soybean proteome (reference: assembly 4 annotation 1).
ID	Gene_name	PF3	PF2	PF1	Pred3	Pred2	Pred1
Glyma.16G009500.2	Glyma.16G009500	PF01176	PF01336	PF01423	0.00364817	0.00446414	0.979348
Glyma.16G009500.3	Glyma.16G009500	PF01176	PF01336	PF01423	0.00364817	0.00446414	0.979348
Glyma.16G009500.1	Glyma.16G009500	PF01176	PF01336	PF01423	0.00364817	0.00446414	0.979348
Glyma.16G167200.3	Glyma.16G167200	PF00168	PF00646	PF01167	0.00884442	0.0098065	0.926302
Glyma.16G167200.2	Glyma.16G167200	PF03478	PF00646	PF01167	0.00693925	0.0595142	0.88222
Glyma.16G167200.1	Glyma.16G167200	PF03478	PF00646	PF01167	0.00693925	0.0595142	0.88222
Glyma.16G091502.1	Glyma.16G091502	PF01088	PF00135	PF14226	0.0350051	0.0400855	0.0901622
Glyma.16G122100.1	Glyma.16G122100	PF00454	PF07714	PF00069	3.25144e-05	0.0131788	0.986782
Glyma.16G063200.1	Glyma.16G063200	PF00551	PF00168	PF01507	0.0592354	0.0824214	0.0894482
Glyma.16G063200.2	Glyma.16G063200	PF00551	PF00168	PF01507	0.0592354	0.0824214	0.0894482
Glyma.16G125600.3	Glyma.16G125600	PF00069	PF00026	PF11721	0.00814079	0.0107812	0.945245
Glyma.16G207600.1	Glyma.16G207600	PF13906	PF04893	PF13962	0.0563034	0.0887422	0.629264
Glyma.16G207600.3	Glyma.16G207600	PF00137	PF01699	PF13962	0.0663502	0.0713167	0.442992
Glyma.16G207600.4	Glyma.16G207600	PF02453	PF13962	PF01699	0.138093	0.159524	0.183177
Glyma.16G207600.5	Glyma.16G207600	PF01699	PF02453	PF13962	0.0871984	0.171907	0.300131
Glyma.16G178600.1	Glyma.16G178600	PF04572	PF07727	PF01823	0.0947997	0.142014	0.319178
Glyma.16G191300.2	Glyma.16G191300	PF00931	PF12937	PF00646	0.0921591	0.214579	0.363707
Glyma.16G168350.1	Glyma.16G168350	PF01094	PF00188	PF13456	0.0265006	0.0312184	0.039207
Glyma.16G098500.1	Glyma.16G098500	PF14634	PF13639	PF00097	0.0412317	0.116471	0.753321
Glyma.16G046400.5	Glyma.16G046400	PF04266	PF00169	PF00293	0.000109234	0.000352395	0.998658
Glyma.16G134900.1	Glyma.16G134900	PF02263	PF04548	PF01926	0.072541	0.132631	0.658966
Glyma.16G169800.1	Glyma.16G169800	PF16486	PF00673	PF00252	0.0586218	0.187262	0.211266
Glyma.16G078600.1	Glyma.16G078600	PF07714	PF00346	PF00069	0.0975553	0.179769	0.299334
Glyma.16G165250.1	Glyma.16G165250	PF00564	PF00134	PF05699	0.0235261	0.0254684	0.0621225
Glyma.16G161800.3	Glyma.16G161800	PF12796	PF17177	PF14432	0.00200063	0.00238569	0.987211
Glyma.16G193166.1	Glyma.16G193166	PF01172	PF00472	PF00808	0.0665697	0.0956942	0.162702
Glyma.16G195100.1	Glyma.16G195100	PF08542	PF14432	PF17177	0.000496874	0.00292679	0.992617
Glyma.16G019500.1	Glyma.16G019500	PF00903	PF00447	PF00076	0.000215344	0.000427925	0.998123
Glyma.16G019500.5	Glyma.16G019500	PF00903	PF00447	PF00076	0.000217485	0.000463488	0.998037
Glyma.16G019500.6	Glyma.16G019500	PF02298	PF00447	PF00076	0.000341979	0.000627857	0.997323
Glyma.16G019500.7	Glyma.16G019500	PF00447	PF05627	PF00076	0.000517548	0.000534508	0.996671
Glyma.16G019500.8	Glyma.16G019500	PF02298	PF00447	PF00076	0.000348013	0.000622532	0.997206
Glyma.16G019500.9	Glyma.16G019500	PF00447	PF05627	PF00076	0.000490268	0.000610334	0.996608
Glyma.16G162200.1	Glyma.16G162200	PF00035	PF01624	PF10075	0.0681951	0.0727549	0.0884384
Glyma.16G162200.3	Glyma.16G162200	PF08314	PF03810	PF12717	0.0740643	0.110563	0.119462
Glyma.16G214669.1	Glyma.16G214669	PF13401	PF00004	PF00931	0.0150788	0.0419332	0.884615
Glyma.16G214669.2	Glyma.16G214669	PF17874	PF00004	PF00931	0.0145711	0.0378112	0.892661
Glyma.16G214669.3	Glyma.16G214669	PF17874	PF00004	PF00931	0.014103	0.0333547	0.903815
Glyma.16G214669.4	Glyma.16G214669	PF00004	PF17874	PF00931	0.0123922	0.0148567	0.955755
Glyma.16G214669.5	Glyma.16G214669	PF00004	PF17874	PF00931	0.0141065	0.0146447	0.948419
Glyma.16G214669.6	Glyma.16G214669	PF00646	PF17874	PF00931	0.00334115	0.00656308	0.984136
Glyma.16G133867.1	Glyma.16G133867	PF00291	PF00478	PF09370	0.0220169	0.053809	0.811141
Glyma.16G217700.1	Glyma.16G217700	PF00505	PF12776	PF00249	0.000845928	0.000910364	0.996834
Glyma.16G217700.2	Glyma.16G217700	PF00505	PF12776	PF00249	0.000845928	0.000910364	0.996834
Glyma.16G045600.1	Glyma.16G045600	PF14634	PF13639	PF00097	0.0816256	0.400971	0.446013
Glyma.16G194800.1	Glyma.16G194800	PF12796	PF14432	PF17177	0.00963036	0.0126334	0.934313
Glyma.16G044500.3	Glyma.16G044500	PF00657	PF00365	PF00248	0.0376093	0.15693	0.161312
Glyma.16G044500.2	Glyma.16G044500	PF00657	PF00365	PF00248	0.0376093	0.15693	0.161312
Glyma.16G029300.1	Glyma.16G029300	PF02453	PF06916	PF14159	0.000441003	0.000606485	0.998759
Glyma.16G038732.1	Glyma.16G038732	PF01061	PF01105	PF00689	0.0379351	0.0394231	0.0417432
Glyma.16G170800.3	Glyma.16G170800	PF00026	PF00646	PF00069	0.0732439	0.0864683	0.212301
Glyma.16G076900.1	Glyma.16G076900	PF02463	PF01926	PF00005	0.00476313	0.00771578	0.983931
Glyma.16G131000.1	Glyma.16G131000	PF06424	PF11698	PF00248	0.0474576	0.0518264	0.0655772
Glyma.16G006966.1	Glyma.16G006966	PF16987	PF05920	PF00046	0.0823928	0.0895224	0.112959
Glyma.16G155800.2	Glyma.16G155800	PF01212	PF00266	PF00155	0.00405581	0.00706259	0.988446
Glyma.16G155800.1	Glyma.16G155800	PF01212	PF00266	PF00155	0.00405581	0.00706259	0.988446
Glyma.16G072800.1	Glyma.16G072800	PF10551	PF10536	PF14111	0.0655102	0.0761053	0.108594
Glyma.16G155500.1	Glyma.16G155500	PF00916	PF03151	PF00361	0.0870926	0.103839	0.166264
Glyma.16G192000.2	Glyma.16G192000	PF00403	PF02037	PF08766	0.0630596	0.0677927	0.154139
Glyma.16G078900.1	Glyma.16G078900	PF01636	PF07714	PF00069	0.000293286	0.0438581	0.955607
Glyma.16G127100.1	Glyma.16G127100	PF13947	PF02140	PF00024	0.163949	0.322354	0.361067
Glyma.16G032300.1	Glyma.16G032300	PF00176	PF02201	PF00069	0.084154	0.108039	0.206817
Glyma.16G046450.1	Glyma.16G046450	PF00501	PF10536	PF00646	0.0186604	0.0210248	0.0574818
Glyma.16G033251.1	Glyma.16G033251	PF13579	PF04413	PF00534	0.118842	0.243372	0.56725
Glyma.16G019900.1	Glyma.16G019900	PF12708	PF00089	PF01565	0.00699955	0.0407648	0.917309
Glyma.16G212900.1	Glyma.16G212900	PF00892	PF00361	PF00909	0.0788897	0.128438	0.321181
Glyma.16G212900.2	Glyma.16G212900	PF06813	PF00361	PF00909	0.0593538	0.264804	0.393869
Glyma.16G177100.1	Glyma.16G177100	PF00817	PF00651	PF07522	0.0345397	0.0759903	0.328092
Glyma.16G061701.1	Glyma.16G061701	PF00578	PF00060	PF01553	0.0667403	0.120221	0.193965
Glyma.16G051800.1	Glyma.16G051800	PF01541	PF03732	PF00505	0.0450349	0.060841	0.315428
Glyma.16G096100.1	Glyma.16G096100	PF00447	PF03467	PF00076	0.00150445	0.00352237	0.981062
Glyma.16G165800.1	Glyma.16G165800	PF01738	PF00293	PF03070	0.0674494	0.0735447	0.163716
Glyma.16G126200.1	Glyma.16G126200	PF06574	PF00271	PF00582	0.0540573	0.0735117	0.151985
Glyma.16G194300.1	Glyma.16G194300	PF01105	PF02298	PF05627	0.0441762	0.0618309	0.0749401
Glyma.16G201800.1	Glyma.16G201800	PF00155	PF00144	PF00016	0.0554714	0.0889583	0.157701
Glyma.16G179100.1	Glyma.16G179100	PF07298	PF00487	PF06916	0.0489841	0.109117	0.642208
Glyma.16G196300.1	Glyma.16G196300	PF17766	PF00717	PF01243	0.0721211	0.108343	0.165583
Glyma.16G196300.2	Glyma.16G196300	PF17766	PF00717	PF01243	0.0721211	0.108343	0.165583
Glyma.16G073500.1	Glyma.16G073500	PF09402	PF00102	PF00782	0.00373119	0.130982	0.854657
Glyma.16G073500.3	Glyma.16G073500	PF10536	PF00102	PF00782	0.00578332	0.143962	0.835794
Glyma.16G203100.1	Glyma.16G203100	PF08240	PF05047	PF03143	0.0266127	0.0302152	0.143103
Glyma.16G140600.2	Glyma.16G140600	PF01348	PF05047	PF05699	0.0506497	0.102349	0.13846
Glyma.16G140600.3	Glyma.16G140600	PF01348	PF05047	PF05699	0.0506497	0.102349	0.13846
Glyma.16G111400.3	Glyma.16G111400	PF07839	PF07557	PF06886	0.157041	0.16103	0.453505
Glyma.16G111400.4	Glyma.16G111400	PF07839	PF07557	PF06886	0.157041	0.16103	0.453505
Glyma.16G111400.1	Glyma.16G111400	PF07839	PF07557	PF06886	0.157041	0.16103	0.453505
Glyma.16G042100.1	Glyma.16G042100	PF08100	PF13456	PF00270	0.0387244	0.0420167	0.0559299
Glyma.16G195400.1	Glyma.16G195400	PF00249	PF14303	PF13259	0.0637156	0.0984365	0.115055
Glyma.16G195400.2	Glyma.16G195400	PF10545	PF00249	PF07741	0.101676	0.10539	0.151751
Glyma.16G145300.1	Glyma.16G145300	PF00561	PF00135	PF00326	0.101215	0.172169	0.265041
Glyma.16G127960.1	Glyma.16G127960	PF00443	PF01753	PF00646	0.0772264	0.0814112	0.158757
Glyma.16G054700.1	Glyma.16G054700	PF13867	PF01778	PF10172	0.0599402	0.0664913	0.345606
Glyma.16G193800.1	Glyma.16G193800	PF14547	PF14368	PF00234	0.0102634	0.265065	0.723678
Glyma.16G200200.1	Glyma.16G200200	PF00195	PF08541	PF00109	0.0509237	0.107075	0.201525
Glyma.16G200200.2	Glyma.16G200200	PF00195	PF08541	PF00109	0.114363	0.212055	0.298045
Glyma.16G032800.1	Glyma.16G032800	PF13649	PF08241	PF03167	0.0785472	0.146551	0.159215
Glyma.16G133200.2	Glyma.16G133200	PF05687	PF00170	PF00010	0.00733745	0.0098138	0.971484
Glyma.16G133200.1	Glyma.16G133200	PF00170	PF05687	PF00010	0.0312971	0.0418653	0.883868
Glyma.16G133200.3	Glyma.16G133200	PF05687	PF00170	PF00010	0.0170346	0.031441	0.855863
Glyma.16G008200.1	Glyma.16G008200	PF16953	PF00112	PF00443	0.0435899	0.161861	0.563913
Glyma.16G156800.1	Glyma.16G156800	PF00361	PF00909	PF13906	0.0670371	0.124985	0.342136
Glyma.16G034200.1	Glyma.16G034200	PF00188	PF00112	PF00024	0.0780915	0.109629	0.132698
Glyma.16G057600.1	Glyma.16G057600	PF01399	PF16916	PF00571	0.00112295	0.00133491	0.993644
Glyma.16G211100.3	Glyma.16G211100	PF13355	PF00248	PF00035	0.0327173	0.214897	0.311095
Glyma.16G107551.1	Glyma.16G107551	PF01397	PF07727	PF03061	0.0784348	0.0792813	0.130538
Glyma.16G033000.1	Glyma.16G033000	PF00754	PF01095	PF12708	0.0604098	0.066103	0.48161
Glyma.16G150400.1	Glyma.16G150400	PF00244	PF01591	PF02338	0.000759842	0.000985705	0.992449
Glyma.16G198300.3	Glyma.16G198300	PF00651	PF07744	PF00076	0.092369	0.0946799	0.104487
Glyma.16G198300.1	Glyma.16G198300	PF00651	PF07744	PF00076	0.092369	0.0946799	0.104487
Glyma.16G198300.4	Glyma.16G198300	PF00651	PF07744	PF00076	0.092369	0.0946799	0.104487
Glyma.16G198300.2	Glyma.16G198300	PF00651	PF07744	PF00076	0.092369	0.0946799	0.104487
Glyma.16G198300.5	Glyma.16G198300	PF00383	PF00651	PF00443	0.0651658	0.0654695	0.104744
Glyma.16G198300.6	Glyma.16G198300	PF12756	PF00383	PF00443	0.0556546	0.0727328	0.0913773
Glyma.16G081400.1	Glyma.16G081400	PF00275	PF01113	PF02800	6.53176e-06	9.43623e-06	0.999965
Glyma.16G142500.1	Glyma.16G142500	PF00254	PF00160	PF00622	0.0951493	0.149361	0.249976
Glyma.16G149800.1	Glyma.16G149800	PF04851	PF00004	PF00270	0.0749456	0.115155	0.115224
Glyma.16G124500.1	Glyma.16G124500	PF00931	PF14629	PF00004	0.0635743	0.18103	0.637903
Glyma.16G025000.1	Glyma.16G025000	PF12937	PF13966	PF00646	0.0434916	0.174526	0.439577
Glyma.16G149400.1	Glyma.16G149400	PF14111	PF05699	PF00168	0.0556945	0.0696155	0.100333
Glyma.16G034900.1	Glyma.16G034900	PF01636	PF07714	PF00069	8.96796e-05	0.0300107	0.969833
Glyma.16G088100.1	Glyma.16G088100	PF07727	PF10536	PF13456	0.0292385	0.0529167	0.062758
Glyma.16G055700.2	Glyma.16G055700	PF04928	PF01909	PF03828	0.0992746	0.218269	0.670853
Glyma.16G055700.1	Glyma.16G055700	PF04928	PF01909	PF03828	0.102817	0.220726	0.665859
Glyma.16G015400.1	Glyma.16G015400	PF00089	PF07714	PF00069	3.95948e-06	0.0172393	0.982748
Glyma.16G015400.3	Glyma.16G015400	PF00454	PF07714	PF00069	7.47567e-06	0.0186913	0.981295
Glyma.16G066700.3	Glyma.16G066700	PF01423	PF00787	PF11976	0.0426144	0.0470932	0.0934482
Glyma.16G012402.1	Glyma.16G012402	PF09346	PF07534	PF00657	0.0507816	0.0512422	0.153175
Glyma.16G012402.4	Glyma.16G012402	PF09346	PF07534	PF00657	0.0507816	0.0512422	0.153175
Glyma.16G012402.2	Glyma.16G012402	PF09346	PF07534	PF00657	0.0507816	0.0512422	0.153175
Glyma.16G012402.3	Glyma.16G012402	PF09346	PF07534	PF00657	0.0507816	0.0512422	0.153175
Glyma.16G171900.1	Glyma.16G171900	PF00089	PF08662	PF12894	0.12241	0.191375	0.260224
Glyma.16G175400.1	Glyma.16G175400	PF06925	PF13579	PF00534	0.058064	0.21177	0.407047
Glyma.16G144000.8	Glyma.16G144000	PF00089	PF07714	PF00069	0.000113831	0.0302259	0.969635
Glyma.16G144000.9	Glyma.16G144000	PF00089	PF07714	PF00069	0.000113831	0.0302259	0.969635
Glyma.16G144000.2	Glyma.16G144000	PF00089	PF07714	PF00069	0.000113831	0.0302259	0.969635
Glyma.16G133500.1	Glyma.16G133500	PF07728	PF13086	PF00004	0.0095297	0.0117475	0.964543
Glyma.16G220700.2	Glyma.16G220700	PF00754	PF00704	PF00059	0.052943	0.0940942	0.256007
Glyma.16G220700.3	Glyma.16G220700	PF00754	PF00704	PF00059	0.052943	0.0940942	0.256007
Glyma.16G220700.4	Glyma.16G220700	PF00754	PF00704	PF00059	0.052943	0.0940942	0.256007
Glyma.16G220700.5	Glyma.16G220700	PF00754	PF00704	PF00059	0.052943	0.0940942	0.256007
Glyma.16G147700.1	Glyma.16G147700	PF00501	PF02453	PF09835	0.0810394	0.10369	0.231858
Glyma.16G134666.1	Glyma.16G134666	PF04280	PF01105	PF04669	0.0396767	0.0733599	0.124964
Glyma.16G127800.3	Glyma.16G127800	PF01612	PF00636	PF00134	0.0949823	0.0958733	0.171359
Glyma.16G123000.1	Glyma.16G123000	PF00092	PF00696	PF00582	0.0890649	0.126452	0.363628
Glyma.16G041900.1	Glyma.16G041900	PF00439	PF00505	PF00188	0.102627	0.127974	0.13789
Glyma.16G088800.1	Glyma.16G088800	PF00060	PF00361	PF07885	0.0333208	0.0420443	0.0966658
Glyma.16G034800.1	Glyma.16G034800	PF13976	PF01753	PF00443	0.0561739	0.0589755	0.0733588
Glyma.16G057400.3	Glyma.16G057400	PF13086	PF08542	PF00004	0.0268315	0.0398523	0.858375
Glyma.16G141600.1	Glyma.16G141600	PF00010	PF07714	PF00069	2.38629e-05	0.0385954	0.961296
Glyma.16G141600.2	Glyma.16G141600	PF00125	PF07714	PF00069	1.98657e-05	0.0491991	0.950732
Glyma.16G178400.1	Glyma.16G178400	PF01106	PF01883	PF00403	0.00254488	0.00409248	0.991013
Glyma.16G088700.1	Glyma.16G088700	PF00249	PF07714	PF00069	1.53553e-06	0.011009	0.988983
Glyma.16G088700.4	Glyma.16G088700	PF00249	PF07714	PF00069	1.53553e-06	0.011009	0.988983
Glyma.16G088700.2	Glyma.16G088700	PF00249	PF07714	PF00069	1.53553e-06	0.011009	0.988983
Glyma.16G100800.3	Glyma.16G100800	PF00170	PF11976	PF01423	0.0474909	0.0484248	0.0816813
Glyma.16G100800.4	Glyma.16G100800	PF00170	PF11976	PF01423	0.0474909	0.0484248	0.0816813
Glyma.16G100800.5	Glyma.16G100800	PF02037	PF00027	PF00588	0.0531888	0.27102	0.387464
Glyma.16G036900.4	Glyma.16G036900	PF00224	PF01281	PF14693	0.000525976	0.00208267	0.994249
Glyma.16G174050.1	Glyma.16G174050	PF05699	PF12937	PF00646	0.0204438	0.171061	0.483569
Glyma.16G092600.3	Glyma.16G092600	PF01636	PF07714	PF00069	0.00019445	0.0325168	0.967124
Glyma.16G092600.1	Glyma.16G092600	PF01636	PF07714	PF00069	0.00013292	0.0359486	0.963723
Glyma.16G211900.1	Glyma.16G211900	PF04043	PF17177	PF14432	0.0109465	0.188971	0.751721
Glyma.16G197800.1	Glyma.16G197800	PF12937	PF08268	PF00646	0.0331792	0.0416808	0.879418
Glyma.16G066300.1	Glyma.16G066300	PF00133	PF14432	PF17177	0.070384	0.12421	0.32624
Glyma.16G066300.2	Glyma.16G066300	PF00133	PF14432	PF17177	0.070384	0.12421	0.32624
Glyma.16G038000.1	Glyma.16G038000	PF00808	PF08648	PF04774	0.016118	0.358254	0.40074
Glyma.16G177900.1	Glyma.16G177900	PF00098	PF01883	PF00403	0.000291845	0.000301803	0.998282
Glyma.16G177900.2	Glyma.16G177900	PF00056	PF03143	PF00403	0.0143954	0.0257279	0.773045
Glyma.16G078000.1	Glyma.16G078000	PF13656	PF01423	PF11976	0.0387404	0.0394436	0.0665629
Glyma.16G182400.1	Glyma.16G182400	PF00076	PF00626	PF00564	0.000125358	0.000178869	0.998868
Glyma.16G182400.2	Glyma.16G182400	PF00596	PF01661	PF00564	0.0056298	0.0103966	0.964253
Glyma.16G182400.5	Glyma.16G182400	PF00817	PF08585	PF00564	0.00260873	0.0031266	0.966605
Glyma.16G182400.3	Glyma.16G182400	PF00817	PF08585	PF00564	0.00260873	0.0031266	0.966605
Glyma.16G182400.4	Glyma.16G182400	PF00817	PF08585	PF00564	0.00260873	0.0031266	0.966605
Glyma.16G142300.1	Glyma.16G142300	PF01794	PF07885	PF03798	0.0483013	0.0948739	0.204547
Glyma.16G046000.1	Glyma.16G046000	PF04851	PF00271	PF00270	0.0795669	0.215216	0.677088
Glyma.16G046000.3	Glyma.16G046000	PF04851	PF00271	PF00270	0.0795669	0.215216	0.677088
Glyma.16G046000.2	Glyma.16G046000	PF04851	PF00271	PF00270	0.0795669	0.215216	0.677088
Glyma.16G077000.1	Glyma.16G077000	PF03151	PF08627	PF00892	0.105273	0.293461	0.34062
Glyma.16G025600.1	Glyma.16G025600	PF00155	PF01717	PF04909	0.0761554	0.0794169	0.418617
Glyma.16G025600.3	Glyma.16G025600	PF01717	PF01261	PF04909	0.056667	0.112939	0.303882
Glyma.16G025600.4	Glyma.16G025600	PF00155	PF04909	PF01261	0.100843	0.107458	0.141905
Glyma.16G025600.5	Glyma.16G025600	PF13409	PF00042	PF04073	0.0440213	0.0634242	0.166911
Glyma.16G025800.3	Glyma.16G025800	PF04928	PF01909	PF03828	0.0658504	0.127651	0.769301
Glyma.16G134732.1	Glyma.16G134732	PF08241	PF00091	PF03358	0.0562688	0.0779252	0.161268
Glyma.16G134732.2	Glyma.16G134732	PF01370	PF00091	PF03358	0.0535603	0.0555145	0.180963
Glyma.16G189200.1	Glyma.16G189200	PF00576	PF01106	PF00403	0.000230201	0.000539873	0.99837
Glyma.16G014900.1	Glyma.16G014900	PF14372	PF00134	PF05699	0.0291325	0.047092	0.37894
Glyma.16G014900.5	Glyma.16G014900	PF00248	PF13456	PF05699	0.0302326	0.0369103	0.51093
Glyma.16G014900.2	Glyma.16G014900	PF00248	PF13456	PF05699	0.0302326	0.0369103	0.51093
Glyma.16G014900.3	Glyma.16G014900	PF00248	PF13456	PF05699	0.0302326	0.0369103	0.51093
Glyma.16G014900.6	Glyma.16G014900	PF00248	PF13456	PF05699	0.0302326	0.0369103	0.51093
Glyma.16G104700.2	Glyma.16G104700	PF10551	PF00646	PF13456	0.0608074	0.074375	0.152743
Glyma.16G215600.3	Glyma.16G215600	PF10545	PF12776	PF00249	0.0512236	0.1614	0.470973
Glyma.16G215600.5	Glyma.16G215600	PF10545	PF12776	PF00249	0.0512236	0.1614	0.470973
Glyma.16G215600.6	Glyma.16G215600	PF10545	PF12776	PF00249	0.0512236	0.1614	0.470973
Glyma.16G215600.4	Glyma.16G215600	PF10545	PF12776	PF00249	0.0512236	0.1614	0.470973
Glyma.16G215600.7	Glyma.16G215600	PF12776	PF13966	PF00249	0.0812846	0.140591	0.313067
Glyma.16G215600.8	Glyma.16G215600	PF07460	PF13966	PF00249	0.0632566	0.0987891	0.204456
Glyma.16G099600.3	Glyma.16G099600	PF00550	PF00210	PF01814	0.0688527	0.181482	0.448019
Glyma.16G034476.1	Glyma.16G034476	PF02221	PF14543	PF01273	0.10922	0.183427	0.376558
Glyma.16G045900.1	Glyma.16G045900	PF10496	PF05008	PF09177	0.056071	0.312172	0.47767
Glyma.16G088000.1	Glyma.16G088000	PF01556	PF00622	PF00254	4.76056e-06	8.1049e-06	0.999971
Glyma.16G088000.2	Glyma.16G088000	PF01556	PF00622	PF00254	5.04912e-06	1.07044e-05	0.999963
Glyma.16G042500.1	Glyma.16G042500	PF13472	PF00026	PF00657	0.078489	0.102331	0.657806
Glyma.16G144700.1	Glyma.16G144700	PF01738	PF00561	PF00326	0.00423523	0.0389826	0.94276
Glyma.16G013500.8	Glyma.16G013500	PF00098	PF07744	PF00567	0.0570623	0.0683325	0.112203
Glyma.16G013500.9	Glyma.16G013500	PF00856	PF00246	PF00443	0.0394984	0.0463548	0.205803
Glyma.16G105000.1	Glyma.16G105000	PF13881	PF13966	PF04997	0.0356327	0.104856	0.121032
Glyma.16G161900.3	Glyma.16G161900	PF17781	PF14432	PF17177	0.0278626	0.064447	0.817916
Glyma.16G066100.2	Glyma.16G066100	PF17032	PF06943	PF10276	0.0528638	0.154092	0.339626
Glyma.16G066100.3	Glyma.16G066100	PF17032	PF06943	PF10276	0.0528638	0.154092	0.339626
Glyma.16G021500.1	Glyma.16G021500	PF00252	PF00347	PF00635	0.123364	0.129993	0.241254
Glyma.16G155700.4	Glyma.16G155700	PF00890	PF07992	PF02852	0.000342278	0.0015614	0.996763
Glyma.16G155700.1	Glyma.16G155700	PF00696	PF07992	PF02852	0.000276274	0.000467376	0.997569
Glyma.16G155700.3	Glyma.16G155700	PF00696	PF07992	PF02852	0.000276274	0.000467376	0.997569
Glyma.16G155700.5	Glyma.16G155700	PF00696	PF07992	PF02852	0.000276274	0.000467376	0.997569
Glyma.16G096900.1	Glyma.16G096900	PF00454	PF07714	PF00069	6.25839e-06	0.00997274	0.990014
Glyma.16G096900.4	Glyma.16G096900	PF00454	PF07714	PF00069	1.34585e-05	0.0104698	0.989505
Glyma.16G096900.5	Glyma.16G096900	PF00454	PF07714	PF00069	8.93287e-06	0.0214297	0.978549
Glyma.16G096900.2	Glyma.16G096900	PF01636	PF07714	PF00069	2.07653e-05	0.0100931	0.989874
Glyma.16G079500.1	Glyma.16G079500	PF05047	PF00685	PF06839	0.0245026	0.0602992	0.136298
Glyma.16G001200.1	Glyma.16G001200	PF01734	PF07714	PF00069	3.87783e-06	0.0159251	0.984064
Glyma.16G054500.1	Glyma.16G054500	PF00098	PF00249	PF00505	0.0129334	0.0168126	0.902234
Glyma.16G054500.3	Glyma.16G054500	PF00098	PF00249	PF00505	0.0129334	0.0168126	0.902234
Glyma.16G042200.2	Glyma.16G042200	PF13976	PF01541	PF01852	0.127217	0.167828	0.171401
Glyma.16G114000.1	Glyma.16G114000	PF04187	PF00497	PF02469	0.0564425	0.125656	0.606282
Glyma.16G037200.1	Glyma.16G037200	PF05191	PF00117	PF00551	4.3819e-05	4.83665e-05	0.999523
Glyma.16G213300.1	Glyma.16G213300	PF01794	PF04389	PF01433	0.043353	0.0679092	0.0738876
Glyma.16G193200.1	Glyma.16G193200	PF07839	PF13266	PF12656	0.0754062	0.111424	0.285414
Glyma.16G177500.1	Glyma.16G177500	PF02889	PF16916	PF00571	0.0272344	0.0805559	0.703373
Glyma.16G126900.1	Glyma.16G126900	PF00024	PF14380	PF13947	0.0950373	0.254735	0.432374
Glyma.16G021900.1	Glyma.16G021900	PF15511	PF00550	PF05699	0.0480043	0.0716007	0.0877871
Glyma.16G108200.2	Glyma.16G108200	PF13091	PF02698	PF03168	0.020154	0.0224182	0.567203
Glyma.16G108200.1	Glyma.16G108200	PF04536	PF02698	PF03168	0.0280212	0.0334079	0.634494
Glyma.16G080600.1	Glyma.16G080600	PF00646	PF00931	PF13456	0.0625722	0.066722	0.348998
Glyma.16G075200.1	Glyma.16G075200	PF00150	PF00174	PF17801	0.122075	0.127675	0.236758
Glyma.16G134951.1	Glyma.16G134951	PF00542	PF00462	PF00085	0.0214672	0.0241799	0.0280233
Glyma.16G075900.1	Glyma.16G075900	PF03501	PF07727	PF00327	0.0454225	0.0516337	0.110623
Glyma.16G112400.1	Glyma.16G112400	PF00690	PF05529	PF07766	0.0647854	0.0822278	0.126137
Glyma.16G073100.1	Glyma.16G073100	PF02737	PF02852	PF07992	0.0244118	0.178395	0.756552
Glyma.16G009800.1	Glyma.16G009800	PF06148	PF00888	PF09763	0.0633266	0.0939899	0.519738
Glyma.16G128900.1	Glyma.16G128900	PF02453	PF06916	PF10260	0.0946169	0.136114	0.209072
Glyma.16G086700.1	Glyma.16G086700	PF17874	PF00004	PF00931	0.0337913	0.0604677	0.802739
Glyma.16G086700.2	Glyma.16G086700	PF13401	PF00004	PF00931	0.0221007	0.0314836	0.914956
Glyma.16G038500.1	Glyma.16G038500	PF00188	PF00127	PF02298	6.15358e-05	0.000490654	0.99916
Glyma.16G095600.2	Glyma.16G095600	PF04774	PF15477	PF08648	0.059486	0.200096	0.243883
Glyma.16G039200.1	Glyma.16G039200	PF05699	PF07727	PF02893	0.0344352	0.0510012	0.0620089
Glyma.16G103100.1	Glyma.16G103100	PF05199	PF14244	PF03167	0.0686273	0.0804064	0.15238
Glyma.16G196000.1	Glyma.16G196000	PF07145	PF05627	PF05678	0.0639273	0.156977	0.188473
Glyma.16G196000.2	Glyma.16G196000	PF05627	PF10172	PF05678	0.125232	0.17078	0.193361
Glyma.16G161000.3	Glyma.16G161000	PF02854	PF00651	PF00134	0.0647869	0.0672792	0.0906224
Glyma.16G161000.1	Glyma.16G161000	PF02854	PF00651	PF00134	0.0647869	0.0672792	0.0906224
Glyma.16G161000.4	Glyma.16G161000	PF02854	PF00651	PF00134	0.0647869	0.0672792	0.0906224
Glyma.16G120600.1	Glyma.16G120600	PF06148	PF00646	PF09759	0.0629617	0.134794	0.175394
Glyma.16G133000.1	Glyma.16G133000	PF02845	PF00884	PF00141	4.30663e-06	4.69119e-06	0.999979
Glyma.16G200900.1	Glyma.16G200900	PF00326	PF00135	PF07859	0.096886	0.318283	0.571199
Glyma.16G049000.1	Glyma.16G049000	PF01592	PF01625	PF10276	0.0388536	0.0818575	0.312425
Glyma.16G063100.1	Glyma.16G063100	PF01852	PF11789	PF00319	0.0544863	0.107759	0.11575
Glyma.16G063100.3	Glyma.16G063100	PF02114	PF11789	PF00319	0.0478461	0.0703263	0.144061
Glyma.16G141700.1	Glyma.16G141700	PF01966	PF13023	PF13328	0.0578155	0.0785488	0.432827
Glyma.16G179900.1	Glyma.16G179900	PF02854	PF00615	PF04782	0.0762334	0.114169	0.121324
Glyma.16G029800.1	Glyma.16G029800	PF08510	PF07884	PF17032	0.0661427	0.154758	0.534991
Glyma.16G026000.1	Glyma.16G026000	PF00651	PF17177	PF14432	0.0001345	0.00472576	0.99443
Glyma.16G146900.1	Glyma.16G146900	PF12928	PF07744	PF00035	0.0504233	0.0659677	0.0839633
Glyma.16G041800.1	Glyma.16G041800	PF00307	PF01417	PF12348	0.143711	0.229091	0.282215
Glyma.16G212700.1	Glyma.16G212700	PF10276	PF06943	PF04438	0.0850574	0.111043	0.195638
Glyma.16G049100.1	Glyma.16G049100	PF01756	PF14432	PF17177	0.0352912	0.340725	0.42504
Glyma.16G201300.1	Glyma.16G201300	PF07716	PF00170	PF00010	0.00173357	0.00264762	0.992118
Glyma.16G201300.2	Glyma.16G201300	PF07716	PF00170	PF00010	0.00171615	0.00262347	0.992187
Glyma.16G201300.3	Glyma.16G201300	PF07716	PF00170	PF00010	0.00170275	0.00260947	0.99222
Glyma.16G128020.1	Glyma.16G128020	PF13401	PF00004	PF00931	0.0107527	0.0240775	0.923047
Glyma.16G186900.2	Glyma.16G186900	PF00026	PF11721	PF00069	0.0555625	0.139286	0.184477
Glyma.16G121400.2	Glyma.16G121400	PF00004	PF01172	PF01814	0.0572709	0.0652755	0.175508
Glyma.16G121400.14	Glyma.16G121400	PF00004	PF01172	PF01814	0.0572709	0.0652755	0.175508
Glyma.16G121400.17	Glyma.16G121400	PF07743	PF00550	PF01814	0.0516546	0.0555214	0.0988476
Glyma.16G121400.15	Glyma.16G121400	PF07743	PF00550	PF01814	0.0516546	0.0555214	0.0988476
Glyma.16G121400.16	Glyma.16G121400	PF07743	PF00550	PF01814	0.0516546	0.0555214	0.0988476
Glyma.16G121400.5	Glyma.16G121400	PF07743	PF00550	PF01814	0.0516546	0.0555214	0.0988476
Glyma.16G035400.7	Glyma.16G035400	PF02906	PF01753	PF00382	0.0693729	0.0864408	0.518958
Glyma.16G035400.1	Glyma.16G035400	PF02906	PF01753	PF00382	0.0693729	0.0864408	0.518958
Glyma.16G053200.1	Glyma.16G053200	PF13947	PF02140	PF00024	0.111593	0.211523	0.429192
Glyma.16G186500.1	Glyma.16G186500	PF00128	PF11721	PF02469	0.116297	0.166222	0.268551
Glyma.16G018600.5	Glyma.16G018600	PF04059	PF00903	PF00076	0.000291308	0.000578366	0.99854
Glyma.16G018600.6	Glyma.16G018600	PF04059	PF00903	PF00076	0.000291308	0.000578366	0.99854
Glyma.16G018600.4	Glyma.16G018600	PF00447	PF00903	PF00076	0.0004045	0.000525184	0.997389
Glyma.16G018600.3	Glyma.16G018600	PF00447	PF00903	PF00076	0.000404499	0.000525183	0.997389
Glyma.16G018600.1	Glyma.16G018600	PF00447	PF00903	PF00076	0.000404499	0.000525183	0.997389
Glyma.16G018600.2	Glyma.16G018600	PF00447	PF00903	PF00076	0.0004045	0.000525184	0.997389
Glyma.16G084300.1	Glyma.16G084300	PF00127	PF02469	PF00139	0.116387	0.120097	0.351341
Glyma.16G066600.1	Glyma.16G066600	PF00082	PF00188	PF00089	0.0877479	0.101619	0.284017
Glyma.16G163600.1	Glyma.16G163600	PF04652	PF07651	PF07524	0.120797	0.122249	0.148357
Glyma.16G002500.1	Glyma.16G002500	PF00027	PF00814	PF02782	0.000371767	0.000551142	0.997944
Glyma.16G002500.2	Glyma.16G002500	PF00294	PF00814	PF02782	0.000760503	0.00176309	0.99474
Glyma.16G214613.1	Glyma.16G214613	PF00481	PF00271	PF10615	0.0442094	0.0537866	0.0594465
Glyma.16G016100.1	Glyma.16G016100	PF12215	PF00704	PF00150	0.060871	0.0723953	0.117782
Glyma.16G039500.1	Glyma.16G039500	PF05199	PF01593	PF00144	0.0294214	0.0309705	0.818114
Glyma.16G047600.2	Glyma.16G047600	PF00046	PF05920	PF05687	0.0910203	0.133845	0.296287
Glyma.16G047600.3	Glyma.16G047600	PF00046	PF05920	PF05687	0.0910203	0.133845	0.296287
Glyma.16G152200.7	Glyma.16G152200	PF02201	PF00249	PF14379	0.00817399	0.0719159	0.91098
Glyma.16G152200.8	Glyma.16G152200	PF02201	PF00249	PF14379	0.00832615	0.0682125	0.913605
Glyma.16G152200.1	Glyma.16G152200	PF02201	PF00249	PF14379	0.00896899	0.0598342	0.922199
Glyma.16G152200.2	Glyma.16G152200	PF02201	PF00249	PF14379	0.00811466	0.0593878	0.924177
Glyma.16G199300.1	Glyma.16G199300	PF12894	PF13570	PF08662	0.0884959	0.208493	0.549205
Glyma.16G040200.1	Glyma.16G040200	PF14703	PF00462	PF00085	0.0089055	0.0200428	0.950815
Glyma.16G147900.1	Glyma.16G147900	PF01399	PF01743	PF02201	0.0639543	0.104844	0.105493
Glyma.16G147900.8	Glyma.16G147900	PF00027	PF01435	PF07727	0.0332204	0.0361111	0.0691768
Glyma.16G147900.4	Glyma.16G147900	PF00651	PF01399	PF07727	0.0638813	0.0674417	0.123839
Glyma.16G020500.1	Glyma.16G020500	PF14215	PF00170	PF00010	0.00110654	0.00114935	0.995684
Glyma.16G186100.3	Glyma.16G186100	PF07714	PF00704	PF00069	0.0714084	0.157571	0.359169
Glyma.16G186100.4	Glyma.16G186100	PF02469	PF00704	PF00069	0.0847418	0.118341	0.163383
Glyma.16G099750.1	Glyma.16G099750	PF03732	PF05699	PF01423	0.0288132	0.0312454	0.0377943
Glyma.16G094300.1	Glyma.16G094300	PF00542	PF02179	PF04536	0.0710616	0.1028	0.376811
Glyma.16G094300.2	Glyma.16G094300	PF01765	PF00542	PF02179	0.0167333	0.033737	0.732457
Glyma.16G018100.1	Glyma.16G018100	PF09133	PF04641	PF00855	0.107542	0.121268	0.16823
Glyma.16G018900.1	Glyma.16G018900	PF00092	PF01915	PF00082	8.04224e-05	0.000139203	0.999623
Glyma.16G076300.1	Glyma.16G076300	PF00732	PF07992	PF05199	0.174017	0.201501	0.264097
Glyma.16G146100.1	Glyma.16G146100	PF03828	PF00155	PF04572	0.0367367	0.169256	0.556805
Glyma.16G146100.5	Glyma.16G146100	PF04572	PF10551	PF07727	0.130453	0.234923	0.27381
Glyma.16G098900.1	Glyma.16G098900	PF00631	PF00010	PF00472	0.0496492	0.0763659	0.0856552
Glyma.16G184451.1	Glyma.16G184451	PF07647	PF05699	PF14215	0.0612562	0.0873875	0.090878
Glyma.16G181000.2	Glyma.16G181000	PF00454	PF07714	PF00069	4.29639e-05	0.0104328	0.989494
Glyma.16G181000.1	Glyma.16G181000	PF00454	PF07714	PF00069	3.11152e-05	0.00862151	0.991315
Glyma.16G181000.3	Glyma.16G181000	PF00089	PF07714	PF00069	4.17286e-06	0.00778339	0.992203
Glyma.16G075800.1	Glyma.16G075800	PF00326	PF00135	PF01764	0.0559334	0.0696262	0.652758
Glyma.16G075800.3	Glyma.16G075800	PF00326	PF00135	PF01764	0.0559334	0.0696262	0.652758
Glyma.16G075800.2	Glyma.16G075800	PF00326	PF00135	PF01764	0.0559334	0.0696262	0.652758
Glyma.16G022500.2	Glyma.16G022500	PF11938	PF02320	PF02953	0.0658635	0.112826	0.121108
Glyma.16G000200.1	Glyma.16G000200	PF01212	PF00266	PF00155	0.00284211	0.0307863	0.964
Glyma.16G000200.2	Glyma.16G000200	PF01212	PF00266	PF00155	0.00127698	0.015536	0.981764
Glyma.16G000200.3	Glyma.16G000200	PF01212	PF00266	PF00155	0.00322864	0.0532116	0.936751
Glyma.16G000200.4	Glyma.16G000200	PF01212	PF00266	PF00155	0.00382546	0.070427	0.91739
Glyma.16G000200.5	Glyma.16G000200	PF01212	PF00266	PF00155	0.00303438	0.0203724	0.97377
Glyma.16G195000.1	Glyma.16G195000	PF14432	PF08542	PF17177	0.000578848	0.00120656	0.995333
Glyma.16G152300.1	Glyma.16G152300	PF00696	PF02878	PF00224	0.0640161	0.0664934	0.23686
Glyma.16G152300.2	Glyma.16G152300	PF02878	PF00271	PF00224	0.0761847	0.0913274	0.327941
Glyma.16G031800.1	Glyma.16G031800	PF00636	PF14432	PF17177	0.00212598	0.041928	0.942031
Glyma.16G205500.1	Glyma.16G205500	PF01753	PF00730	PF00383	0.131255	0.166024	0.177926
Glyma.16G089550.1	Glyma.16G089550	PF01476	PF00188	PF00089	0.0413954	0.0486078	0.0652403
Glyma.16G138300.13	Glyma.16G138300	PF12348	PF12796	PF12717	0.0430417	0.0860486	0.624076
Glyma.16G138300.15	Glyma.16G138300	PF12348	PF12796	PF12717	0.0430417	0.0860486	0.624076
Glyma.16G138300.16	Glyma.16G138300	PF12348	PF12796	PF12717	0.0430417	0.0860486	0.624076
Glyma.16G138300.17	Glyma.16G138300	PF12348	PF12796	PF12717	0.0430417	0.0860486	0.624076
Glyma.16G138300.1	Glyma.16G138300	PF12348	PF12796	PF12717	0.0430417	0.0860486	0.624076
Glyma.16G138300.14	Glyma.16G138300	PF12348	PF12796	PF12717	0.0430417	0.0860486	0.624076
Glyma.16G138300.18	Glyma.16G138300	PF12796	PF12348	PF12717	0.0990547	0.109109	0.518845
Glyma.16G138300.2	Glyma.16G138300	PF12348	PF03810	PF12717	0.0606589	0.0812438	0.337466
Glyma.16G138300.8	Glyma.16G138300	PF12348	PF03810	PF12717	0.0606589	0.0812438	0.337466
Glyma.16G138300.10	Glyma.16G138300	PF12348	PF03810	PF12717	0.0606589	0.0812438	0.337466
Glyma.16G138300.19	Glyma.16G138300	PF12796	PF12348	PF12717	0.094181	0.101071	0.400341
Glyma.16G138300.5	Glyma.16G138300	PF12796	PF00651	PF16528	0.11538	0.125038	0.418081
Glyma.16G138300.6	Glyma.16G138300	PF12796	PF00651	PF16528	0.1174	0.134881	0.372063
Glyma.16G116800.2	Glyma.16G116800	PF00307	PF00615	PF13456	0.0971826	0.11151	0.11183
Glyma.16G064401.1	Glyma.16G064401	PF01636	PF07714	PF00069	1.08327e-05	0.00973902	0.990248
Glyma.16G026300.2	Glyma.16G026300	PF00808	PF00010	PF00125	0.0172987	0.0935146	0.869992
Glyma.16G130500.5	Glyma.16G130500	PF00004	PF00615	PF00169	0.135232	0.153671	0.187753
Glyma.16G130500.3	Glyma.16G130500	PF00615	PF00004	PF00169	0.142659	0.149629	0.175289
Glyma.16G130500.14	Glyma.16G130500	PF00615	PF00004	PF00169	0.142659	0.149629	0.175289
Glyma.16G130500.6	Glyma.16G130500	PF00615	PF00004	PF00169	0.142659	0.149629	0.175289
Glyma.16G130500.11	Glyma.16G130500	PF00169	PF00004	PF00615	0.0773532	0.136051	0.340801
Glyma.16G130500.10	Glyma.16G130500	PF07647	PF00787	PF00169	0.0714647	0.0731335	0.157837
Glyma.16G117251.1	Glyma.16G117251	PF12937	PF10536	PF00646	0.0565527	0.138619	0.155838
Glyma.16G151800.1	Glyma.16G151800	PF02893	PF00581	PF02362	0.0431959	0.0650489	0.0813358
Glyma.16G016000.1	Glyma.16G016000	PF00026	PF12706	PF00149	0.00042824	0.00056408	0.995594
Glyma.16G195700.2	Glyma.16G195700	PF12796	PF14432	PF17177	0.000427352	0.0078917	0.988371
Glyma.16G195700.1	Glyma.16G195700	PF12796	PF14432	PF17177	0.000427352	0.0078917	0.988371
Glyma.16G022100.1	Glyma.16G022100	PF00266	PF14432	PF17177	0.0199092	0.118179	0.694685
Glyma.16G037800.1	Glyma.16G037800	PF14237	PF03441	PF00168	0.0658136	0.121158	0.253013
Glyma.16G037800.3	Glyma.16G037800	PF04536	PF02453	PF00168	0.058224	0.103462	0.330704
Glyma.16G037800.2	Glyma.16G037800	PF04536	PF02453	PF00168	0.058224	0.103462	0.330704
Glyma.16G037800.4	Glyma.16G037800	PF08652	PF03104	PF13640	0.0415333	0.110668	0.137416
Glyma.16G049500.1	Glyma.16G049500	PF02737	PF00899	PF00291	0.0588135	0.245411	0.593459
Glyma.16G049500.2	Glyma.16G049500	PF02737	PF00899	PF00291	0.128937	0.182364	0.490052
Glyma.16G064000.1	Glyma.16G064000	PF00505	PF12214	PF06886	0.0422365	0.250163	0.668432
Glyma.16G064000.2	Glyma.16G064000	PF00505	PF12214	PF06886	0.0417429	0.243971	0.666957
Glyma.16G138800.1	Glyma.16G138800	PF04893	PF01061	PF06813	0.0639288	0.254691	0.46073
Glyma.16G022000.1	Glyma.16G022000	PF03810	PF12719	PF12717	0.0908898	0.118081	0.167222
Glyma.16G022000.2	Glyma.16G022000	PF12333	PF03810	PF04100	0.0648	0.0768226	0.420518
Glyma.16G022000.3	Glyma.16G022000	PF00307	PF09763	PF04100	0.102978	0.154612	0.181464
Glyma.16G207000.2	Glyma.16G207000	PF01765	PF00010	PF00472	0.000124075	0.000193024	0.999238
Glyma.16G204800.4	Glyma.16G204800	PF12796	PF17177	PF14432	1.25792e-05	0.00048036	0.999478
Glyma.16G212200.1	Glyma.16G212200	PF13947	PF00026	PF02221	0.0477256	0.242962	0.358947
Glyma.16G033100.2	Glyma.16G033100	PF00481	PF14309	PF00536	0.0780786	0.114477	0.140936
Glyma.16G033100.1	Glyma.16G033100	PF00481	PF14309	PF00536	0.0780786	0.114477	0.140936
Glyma.16G033100.3	Glyma.16G033100	PF00481	PF14309	PF00536	0.0780784	0.114478	0.140936
Glyma.16G033100.4	Glyma.16G033100	PF07647	PF00564	PF00536	0.0856445	0.0922349	0.214115
Glyma.16G161600.1	Glyma.16G161600	PF02926	PF00027	PF00498	0.0719682	0.110594	0.255224
Glyma.16G161400.1	Glyma.16G161400	PF05617	PF00024	PF00059	0.0621886	0.0743897	0.0749807
Glyma.16G050300.1	Glyma.16G050300	PF08268	PF03478	PF02362	0.0014665	0.00232572	0.989852
Glyma.16G060800.1	Glyma.16G060800	PF00254	PF07883	PF00190	6.14251e-05	0.042084	0.957791
Glyma.16G112800.3	Glyma.16G112800	PF03914	PF02854	PF04802	0.143754	0.152647	0.266755
Glyma.16G112800.4	Glyma.16G112800	PF03914	PF02854	PF04802	0.143754	0.152647	0.266755
Glyma.16G112800.2	Glyma.16G112800	PF03914	PF02854	PF04802	0.143754	0.152647	0.266755
Glyma.16G112800.1	Glyma.16G112800	PF03914	PF02854	PF04802	0.143754	0.152647	0.266755
Glyma.16G100600.1	Glyma.16G100600	PF07839	PF02179	PF14383	0.05142	0.0532462	0.0959156
Glyma.16G009000.2	Glyma.16G009000	PF08806	PF00031	PF05617	0.0578928	0.0909558	0.164975
Glyma.16G009000.1	Glyma.16G009000	PF00651	PF00383	PF00382	0.0386097	0.0652902	0.0985687
Glyma.16G056200.11	Glyma.16G056200	PF00210	PF09325	PF03962	0.0847992	0.1043	0.133127
Glyma.16G056200.1	Glyma.16G056200	PF09763	PF00210	PF03962	0.0687745	0.257115	0.292472
Glyma.16G011600.1	Glyma.16G011600	PF00754	PF02018	PF08547	0.0213182	0.0293131	0.807399
Glyma.16G011600.2	Glyma.16G011600	PF16158	PF00059	PF00754	0.0875199	0.141901	0.17413
Glyma.16G007100.1	Glyma.16G007100	PF00505	PF10545	PF00249	0.00275029	0.00341791	0.992066
Glyma.16G189900.3	Glyma.16G189900	PF08729	PF07839	PF12656	0.0833116	0.101687	0.125133
Glyma.16G189900.1	Glyma.16G189900	PF08729	PF07839	PF12656	0.0848979	0.0951093	0.120737
Glyma.16G189900.2	Glyma.16G189900	PF06886	PF12656	PF07839	0.079799	0.102386	0.106967
Glyma.16G189900.4	Glyma.16G189900	PF08729	PF12656	PF07839	0.0582741	0.0867272	0.118036
Glyma.16G099550.1	Glyma.16G099550	PF00271	PF13632	PF00535	0.0212993	0.0226162	0.836915
Glyma.16G197400.1	Glyma.16G197400	PF10551	PF00271	PF13456	0.0812932	0.106924	0.133062
Glyma.16G098600.1	Glyma.16G098600	PF00596	PF00557	PF13193	0.0381245	0.0451539	0.109224
Glyma.16G098600.2	Glyma.16G098600	PF00596	PF00557	PF13193	0.0381245	0.0451539	0.109224
Glyma.16G154900.2	Glyma.16G154900	PF14379	PF00046	PF00505	0.0503863	0.100237	0.163029
Glyma.16G148650.1	Glyma.16G148650	PF08662	PF00370	PF00026	0.08053	0.0859985	0.0987148
Glyma.16G044200.1	Glyma.16G044200	PF02221	PF07732	PF07731	0.0955876	0.113535	0.218826
Glyma.16G064200.1	Glyma.16G064200	PF01636	PF07714	PF00069	0.000180219	0.0323094	0.967436
Glyma.16G130700.3	Glyma.16G130700	PF00135	PF00561	PF00326	0.105472	0.192631	0.463275
Glyma.16G130700.1	Glyma.16G130700	PF00135	PF00561	PF00326	0.105472	0.192631	0.463275
Glyma.16G049300.1	Glyma.16G049300	PF01048	PF01967	PF00696	0.000249737	0.000260332	0.997439
Glyma.16G049300.2	Glyma.16G049300	PF01048	PF01967	PF00696	0.000249737	0.000260332	0.997439
Glyma.16G099700.1	Glyma.16G099700	PF13632	PF00689	PF16212	0.0015289	0.00579442	0.990116
Glyma.16G015300.1	Glyma.16G015300	PF04059	PF02298	PF00076	0.000725396	0.000971947	0.994623
Glyma.16G092800.1	Glyma.16G092800	PF00252	PF00707	PF00327	0.194927	0.245904	0.359036
Glyma.16G172000.1	Glyma.16G172000	PF05699	PF10536	PF14244	0.0459404	0.0461114	0.0675133
Glyma.16G059700.1	Glyma.16G059700	PF00089	PF07714	PF00069	0.000199686	0.0493931	0.950258
Glyma.16G059700.5	Glyma.16G059700	PF00089	PF07714	PF00069	0.000354105	0.0514949	0.947929
Glyma.16G059700.3	Glyma.16G059700	PF00089	PF07714	PF00069	0.000354105	0.0514949	0.947929
Glyma.16G059700.2	Glyma.16G059700	PF00089	PF07714	PF00069	0.000354105	0.0514949	0.947929
Glyma.16G059700.4	Glyma.16G059700	PF00089	PF07714	PF00069	0.000354105	0.0514949	0.947929
Glyma.16G059700.6	Glyma.16G059700	PF00089	PF07714	PF00069	0.000354105	0.0514949	0.947929
Glyma.16G009200.1	Glyma.16G009200	PF07002	PF13519	PF00092	0.000920611	0.0198559	0.975926
Glyma.16G104800.1	Glyma.16G104800	PF04927	PF04774	PF08648	0.117797	0.167232	0.248318
Glyma.16G104800.2	Glyma.16G104800	PF05699	PF01775	PF00244	0.0286475	0.051558	0.0550452
Glyma.16G177000.1	Glyma.16G177000	PF13878	PF02892	PF12171	0.0985145	0.312661	0.384198
Glyma.16G065000.1	Glyma.16G065000	PF01636	PF07714	PF00069	0.000396726	0.0282832	0.970858
Glyma.16G065000.2	Glyma.16G065000	PF01636	PF07714	PF00069	7.04231e-05	0.0348767	0.964997
Glyma.16G065000.3	Glyma.16G065000	PF01636	PF07714	PF00069	1.11231e-05	0.0255155	0.974454
Glyma.16G179800.1	Glyma.16G179800	PF00501	PF01326	PF03129	9.59667e-05	0.000177287	0.999378
Glyma.16G096700.1	Glyma.16G096700	PF18511	PF12937	PF00646	0.0107254	0.156956	0.812184
Glyma.16G012500.1	Glyma.16G012500	PF03629	PF13472	PF00657	2.38745e-05	0.0756853	0.924275
Glyma.16G132600.8	Glyma.16G132600	PF00487	PF00060	PF01435	0.122498	0.158059	0.216306
Glyma.16G132600.4	Glyma.16G132600	PF07993	PF06974	PF01553	0.0491819	0.140669	0.217017
Glyma.16G178300.3	Glyma.16G178300	PF01918	PF01883	PF00403	0.000316086	0.00205618	0.995572
Glyma.16G178300.4	Glyma.16G178300	PF01918	PF01883	PF00403	0.000316086	0.00205618	0.995572
Glyma.16G178300.1	Glyma.16G178300	PF01918	PF01883	PF00403	0.000316086	0.00205618	0.995572
Glyma.16G178300.2	Glyma.16G178300	PF01918	PF01883	PF00403	0.000762009	0.00566714	0.989197
Glyma.16G178300.6	Glyma.16G178300	PF01918	PF01883	PF00403	0.000762009	0.00566714	0.989197
Glyma.16G178300.5	Glyma.16G178300	PF01918	PF01883	PF00403	0.000762009	0.00566714	0.989197
Glyma.16G046200.1	Glyma.16G046200	PF00916	PF00999	PF00955	0.162502	0.163585	0.207247
Glyma.16G046200.2	Glyma.16G046200	PF00361	PF00916	PF00999	0.113068	0.193937	0.263312
Glyma.16G183800.2	Glyma.16G183800	PF07714	PF00102	PF00011	0.0600978	0.0684363	0.0705614
Glyma.16G168700.1	Glyma.16G168700	PF00059	PF02469	PF00754	0.0715779	0.111327	0.123149
Glyma.16G212000.1	Glyma.16G212000	PF13579	PF00534	PF04413	0.0835525	0.191869	0.206611
Glyma.16G068200.1	Glyma.16G068200	PF01348	PF00505	PF00327	0.0368595	0.0448849	0.0481794
Glyma.16G086766.1	Glyma.16G086766	PF01336	PF13456	PF01029	0.0812001	0.0823509	0.121183
Glyma.16G173300.1	Glyma.16G173300	PF14111	PF01553	PF17032	0.0521385	0.0525437	0.0680717
Glyma.16G160700.2	Glyma.16G160700	PF17781	PF14432	PF17177	0.00511529	0.0071711	0.968283
Glyma.16G160700.1	Glyma.16G160700	PF17781	PF14432	PF17177	0.00690652	0.0112096	0.935276
Glyma.16G217600.1	Glyma.16G217600	PF03467	PF04059	PF00076	0.00119257	0.00585139	0.984926
Glyma.16G171200.1	Glyma.16G171200	PF05193	PF00622	PF00069	0.0562287	0.0696966	0.280162
Glyma.16G220500.1	Glyma.16G220500	PF00578	PF06110	PF00085	0.0322509	0.0409186	0.894297
Glyma.16G109900.1	Glyma.16G109900	PF00076	PF05627	PF08648	0.120457	0.140694	0.292296
Glyma.16G130900.1	Glyma.16G130900	PF00704	PF00135	PF00326	0.125388	0.17114	0.336358
Glyma.16G106600.1	Glyma.16G106600	PF14111	PF13456	PF13966	0.0416414	0.360703	0.427967
Glyma.16G072000.1	Glyma.16G072000	PF13532	PF14226	PF03171	0.000129707	0.000297184	0.999496
Glyma.16G029900.1	Glyma.16G029900	PF03941	PF10377	PF00307	0.121162	0.124293	0.238413
Glyma.16G048900.1	Glyma.16G048900	PF04572	PF00024	PF00089	0.0577871	0.0688468	0.283264
Glyma.16G081700.1	Glyma.16G081700	PF08392	PF15982	PF00134	0.0470674	0.0959805	0.257229
Glyma.16G134400.1	Glyma.16G134400	PF01593	PF00891	PF05368	0.0961948	0.131428	0.186916
Glyma.16G086733.1	Glyma.16G086733	PF13442	PF17032	PF07884	0.0636272	0.0818501	0.102187
Glyma.16G124700.1	Glyma.16G124700	PF17874	PF12348	PF00307	0.0595377	0.0801721	0.182251
Glyma.16G154400.7	Glyma.16G154400	PF12110	PF06424	PF07842	0.00388596	0.0548266	0.935499
Glyma.16G154400.1	Glyma.16G154400	PF12110	PF06424	PF07842	0.00388596	0.0548266	0.935499
Glyma.16G154400.10	Glyma.16G154400	PF12110	PF06424	PF07842	0.00388596	0.0548266	0.935499
Glyma.16G154400.9	Glyma.16G154400	PF12110	PF06424	PF07842	0.00388596	0.0548266	0.935499
Glyma.16G154400.8	Glyma.16G154400	PF12110	PF06424	PF07842	0.00388596	0.0548266	0.935499
Glyma.16G051400.1	Glyma.16G051400	PF13976	PF12171	PF00098	0.126048	0.142301	0.451693
Glyma.16G153800.3	Glyma.16G153800	PF08719	PF14111	PF08652	0.0867212	0.120256	0.12381
Glyma.16G006600.1	Glyma.16G006600	PF00005	PF08423	PF01926	0.0661843	0.215266	0.496264
Glyma.16G204200.4	Glyma.16G204200	PF14372	PF02892	PF05699	0.180428	0.220606	0.58383
Glyma.16G204200.1	Glyma.16G204200	PF14372	PF02892	PF05699	0.180428	0.220606	0.58383
Glyma.16G204200.2	Glyma.16G204200	PF14372	PF02892	PF05699	0.191775	0.275962	0.507711
Glyma.16G204200.5	Glyma.16G204200	PF14372	PF02892	PF05699	0.191775	0.275962	0.507711
Glyma.16G133400.2	Glyma.16G133400	PF02892	PF17780	PF03468	0.0294652	0.0492124	0.692644
Glyma.16G133400.3	Glyma.16G133400	PF02892	PF00855	PF03468	0.00939318	0.0239378	0.88744
Glyma.16G133400.4	Glyma.16G133400	PF02892	PF00855	PF03468	0.00939318	0.0239378	0.88744
Glyma.16G133400.5	Glyma.16G133400	PF02892	PF00855	PF03468	0.00939318	0.0239378	0.88744
Glyma.16G168400.1	Glyma.16G168400	PF00010	PF00170	PF07716	0.0383236	0.354514	0.522188
Glyma.16G138602.1	Glyma.16G138602	PF05920	PF00046	PF00249	0.0396769	0.0638637	0.18076
Glyma.16G018000.1	Glyma.16G018000	PF01753	PF02845	PF00307	0.0192608	0.0363905	0.750048
Glyma.16G018000.2	Glyma.16G018000	PF00307	PF07524	PF02845	0.0529244	0.083288	0.161455
Glyma.16G096000.1	Glyma.16G096000	PF01794	PF03798	PF16212	0.146997	0.224149	0.236616
Glyma.16G013300.6	Glyma.16G013300	PF10551	PF02902	PF07727	0.0425676	0.0438427	0.225876
Glyma.16G211400.5	Glyma.16G211400	PF13401	PF00004	PF00931	0.0123893	0.0459809	0.893002
Glyma.16G211400.3	Glyma.16G211400	PF13401	PF00004	PF00931	0.0104425	0.039711	0.906523
Glyma.16G211400.4	Glyma.16G211400	PF13401	PF00004	PF00931	0.0104425	0.039711	0.906523
Glyma.16G211400.2	Glyma.16G211400	PF13401	PF00004	PF00931	0.010812	0.0373062	0.910582
Glyma.16G152133.1	Glyma.16G152133	PF00024	PF02140	PF00031	0.067707	0.0760722	0.217498
Glyma.16G158501.1	Glyma.16G158501	PF00501	PF05699	PF00134	0.0214026	0.0328625	0.0562131
Glyma.16G122800.4	Glyma.16G122800	PF07808	PF12936	PF08159	0.0061705	0.00668352	0.980093
Glyma.16G037000.1	Glyma.16G037000	PF01794	PF00498	PF00581	0.0795486	0.0965202	0.375384
Glyma.16G070200.3	Glyma.16G070200	PF02678	PF07883	PF00190	0.000156585	0.076124	0.923393
Glyma.16G070200.1	Glyma.16G070200	PF00127	PF07883	PF00190	0.000168582	0.077135	0.922169
Glyma.16G007032.1	Glyma.16G007032	PF11976	PF00536	PF03847	0.0343114	0.167822	0.27327
Glyma.16G107300.1	Glyma.16G107300	PF01738	PF00561	PF00326	0.0507023	0.309216	0.372666
Glyma.16G107300.6	Glyma.16G107300	PF01738	PF00326	PF00561	0.0405985	0.350935	0.391779
Glyma.16G107300.10	Glyma.16G107300	PF01738	PF00561	PF00326	0.0545323	0.315479	0.419122
Glyma.16G107300.9	Glyma.16G107300	PF01738	PF00561	PF00326	0.0545323	0.315479	0.419122
Glyma.16G107300.8	Glyma.16G107300	PF01738	PF00561	PF00326	0.0545323	0.315479	0.419122
Glyma.16G107300.7	Glyma.16G107300	PF01738	PF00561	PF00326	0.0545323	0.315479	0.419122
Glyma.16G107300.3	Glyma.16G107300	PF01738	PF00561	PF00326	0.0545323	0.315479	0.419122
Glyma.16G107300.2	Glyma.16G107300	PF01738	PF00561	PF00326	0.0545323	0.315479	0.419122
Glyma.16G165000.2	Glyma.16G165000	PF04059	PF11835	PF00076	0.00120731	0.00523288	0.989199
Glyma.16G069800.1	Glyma.16G069800	PF00127	PF07883	PF00190	0.000329597	0.090001	0.909042
Glyma.16G153200.1	Glyma.16G153200	PF00557	PF00266	PF02541	0.0626803	0.0713886	0.139328
Glyma.16G002900.3	Glyma.16G002900	PF03168	PF00135	PF08510	0.0213635	0.245171	0.306162
Glyma.16G002900.4	Glyma.16G002900	PF03168	PF00135	PF08510	0.0213635	0.245171	0.306162
Glyma.16G002900.5	Glyma.16G002900	PF03168	PF00135	PF08510	0.0213635	0.245171	0.306162
Glyma.16G050900.1	Glyma.16G050900	PF12756	PF07716	PF10419	0.059655	0.0916163	0.134648
Glyma.16G002700.1	Glyma.16G002700	PF05627	PF10172	PF05678	0.0571803	0.0791308	0.17082
Glyma.16G051300.1	Glyma.16G051300	PF05057	PF12697	PF00561	0.04002	0.278804	0.647542
Glyma.16G051300.3	Glyma.16G051300	PF05057	PF12697	PF00561	0.1061	0.183743	0.3678
Glyma.16G024500.1	Glyma.16G024500	PF00174	PF01578	PF01794	0.0475382	0.146609	0.456489
Glyma.16G024500.2	Glyma.16G024500	PF00174	PF01578	PF01794	0.0474821	0.14713	0.456028
Glyma.16G026800.1	Glyma.16G026800	PF15511	PF13867	PF00808	0.0889006	0.272031	0.30823
Glyma.16G019000.2	Glyma.16G019000	PF01975	PF01915	PF00082	3.89034e-05	0.000116278	0.999735
Glyma.16G021400.1	Glyma.16G021400	PF03987	PF01883	PF10419	0.0931212	0.101516	0.378174
Glyma.16G053900.1	Glyma.16G053900	PF05678	PF05687	PF00010	0.0924199	0.18762	0.285076
Glyma.16G042051.1	Glyma.16G042051	PF13456	PF00141	PF00646	0.0220731	0.0264196	0.0354981
Glyma.16G183900.1	Glyma.16G183900	PF01636	PF10536	PF00069	0.0461906	0.198043	0.220239
Glyma.16G202000.1	Glyma.16G202000	PF00059	PF02221	PF00024	0.102477	0.157992	0.193134
Glyma.16G174700.4	Glyma.16G174700	PF12937	PF00646	PF00931	0.0654506	0.201421	0.358081
Glyma.16G174700.5	Glyma.16G174700	PF12937	PF00646	PF00931	0.0654506	0.201421	0.358081
Glyma.16G005500.6	Glyma.16G005500	PF00443	PF13891	PF00010	0.161154	0.162271	0.281154
Glyma.16G005500.4	Glyma.16G005500	PF00010	PF00443	PF13891	0.12561	0.199503	0.249557
Glyma.16G005500.5	Glyma.16G005500	PF00010	PF00443	PF13891	0.12561	0.199503	0.249557
Glyma.16G005500.3	Glyma.16G005500	PF00010	PF00443	PF13891	0.12561	0.199503	0.249557
Glyma.16G005500.2	Glyma.16G005500	PF00010	PF00443	PF13891	0.12561	0.199503	0.249557
Glyma.16G005500.1	Glyma.16G005500	PF00010	PF00443	PF13891	0.12561	0.199503	0.249557
Glyma.16G214900.1	Glyma.16G214900	PF17874	PF00004	PF00931	0.0209615	0.0235537	0.935683
Glyma.16G214900.7	Glyma.16G214900	PF17874	PF00004	PF00931	0.0187136	0.0361731	0.919152
Glyma.16G214900.8	Glyma.16G214900	PF00004	PF17874	PF00931	0.00390246	0.0125439	0.97783
Glyma.16G214900.5	Glyma.16G214900	PF00004	PF17874	PF00931	0.00285003	0.00699935	0.985473
Glyma.16G169100.1	Glyma.16G169100	PF00657	PF00754	PF02469	0.052856	0.070134	0.283683
Glyma.16G129102.1	Glyma.16G129102	PF00188	PF00026	PF00089	0.0669454	0.0816444	0.0839541
Glyma.16G129102.2	Glyma.16G129102	PF00188	PF00026	PF00089	0.0669454	0.0816444	0.0839541
Glyma.16G005800.1	Glyma.16G005800	PF03644	PF01301	PF00561	0.0649409	0.107163	0.142427
Glyma.16G005800.2	Glyma.16G005800	PF12697	PF01553	PF00561	0.0763097	0.0768661	0.196474
Glyma.16G174500.1	Glyma.16G174500	PF01273	PF12937	PF00646	0.13639	0.180394	0.290213
Glyma.16G107900.5	Glyma.16G107900	PF01823	PF01734	PF05699	0.0581585	0.0662508	0.13054
Glyma.16G107900.2	Glyma.16G107900	PF01823	PF01734	PF05699	0.0581585	0.0662508	0.13054
Glyma.16G107900.6	Glyma.16G107900	PF01823	PF01734	PF05699	0.0581585	0.0662508	0.13054
Glyma.16G107900.4	Glyma.16G107900	PF01823	PF07647	PF05699	0.0357527	0.0491337	0.115419
Glyma.16G164500.1	Glyma.16G164500	PF07885	PF06454	PF08510	0.0750694	0.159766	0.261292
Glyma.16G164500.3	Glyma.16G164500	PF01794	PF03151	PF06454	0.0475052	0.089173	0.0999795
Glyma.16G164500.4	Glyma.16G164500	PF01794	PF03151	PF06454	0.0475052	0.089173	0.0999795
Glyma.16G068900.1	Glyma.16G068900	PF00246	PF13472	PF00657	2.41501e-05	0.0723411	0.927578
Glyma.16G155300.2	Glyma.16G155300	PF00098	PF12171	PF00505	0.0624521	0.0669599	0.0827182
Glyma.16G155300.1	Glyma.16G155300	PF00098	PF12171	PF00505	0.0624521	0.0669599	0.0827182
Glyma.16G155300.3	Glyma.16G155300	PF00098	PF12171	PF00505	0.0624521	0.0669599	0.0827182
Glyma.16G207300.1	Glyma.16G207300	PF17903	PF00252	PF00189	5.10305e-05	0.000172616	0.99958
Glyma.16G209000.1	Glyma.16G209000	PF00685	PF02223	PF14363	0.0635238	0.0721126	0.0790051
Glyma.16G209000.2	Glyma.16G209000	PF00685	PF02223	PF14363	0.0635238	0.0721126	0.0790051
Glyma.16G058200.1	Glyma.16G058200	PF00717	PF16575	PF00485	7.09558e-05	0.000110418	0.999392
Glyma.16G013100.1	Glyma.16G013100	PF13180	PF01180	PF00562	0.0755607	0.159166	0.187647
Glyma.16G186700.1	Glyma.16G186700	PF00069	PF11721	PF02469	0.106256	0.202526	0.2618
Glyma.16G186700.2	Glyma.16G186700	PF04424	PF01273	PF00307	0.0932505	0.104188	0.140506
Glyma.16G182833.1	Glyma.16G182833	PF08387	PF13456	PF00134	0.0329587	0.0351394	0.0397888
Glyma.16G131800.2	Glyma.16G131800	PF00704	PF00150	PF01301	0.00342726	0.0169524	0.966409
Glyma.16G131800.1	Glyma.16G131800	PF00704	PF00150	PF01301	0.00770463	0.0569123	0.919798
Glyma.16G131800.3	Glyma.16G131800	PF00704	PF00150	PF01301	0.00907674	0.0367291	0.949013
Glyma.16G206200.1	Glyma.16G206200	PF16561	PF00168	PF00011	3.90903e-05	5.98166e-05	0.999619
Glyma.16G109600.1	Glyma.16G109600	PF04059	PF00903	PF00076	0.0007912	0.00107492	0.9918
Glyma.16G146700.1	Glyma.16G146700	PF01565	PF14543	PF00026	0.0483994	0.0626471	0.318809
Glyma.16G125050.1	Glyma.16G125050	PF00249	PF09350	PF02201	0.0532939	0.102149	0.174185
Glyma.16G104600.1	Glyma.16G104600	PF01636	PF07714	PF00069	2.72244e-06	0.0130955	0.986898
Glyma.16G095900.1	Glyma.16G095900	PF00188	PF01841	PF00112	1.81401e-05	3.14023e-05	0.999898
Glyma.16G148000.1	Glyma.16G148000	PF17781	PF00134	PF05004	0.0586073	0.122719	0.391098
Glyma.16G215700.2	Glyma.16G215700	PF00031	PF03168	PF02298	0.00435374	0.00436206	0.9718
Glyma.16G204266.1	Glyma.16G204266	PF07145	PF00046	PF00631	0.0417249	0.042009	0.106479
Glyma.16G139300.1	Glyma.16G139300	PF10545	PF00249	PF12776	0.109504	0.137633	0.169406
Glyma.16G172300.1	Glyma.16G172300	PF00622	PF00059	PF00069	0.0517609	0.0622137	0.174547
Glyma.16G033700.1	Glyma.16G033700	PF08323	PF12706	PF03033	0.0530427	0.219297	0.35674
Glyma.16G143700.1	Glyma.16G143700	PF04893	PF01794	PF03798	0.0844741	0.204224	0.443356
Glyma.16G010500.1	Glyma.16G010500	PF02037	PF09329	PF00849	0.100415	0.153842	0.318557
Glyma.16G010500.3	Glyma.16G010500	PF00098	PF09329	PF00498	0.0794095	0.110821	0.140227
Glyma.16G145100.1	Glyma.16G145100	PF00326	PF12697	PF00561	0.00965095	0.187902	0.800021
Glyma.16G145100.2	Glyma.16G145100	PF00326	PF12697	PF00561	0.0186596	0.171311	0.801348
Glyma.16G190300.1	Glyma.16G190300	PF00704	PF12937	PF00646	0.0379987	0.0966304	0.227525
Glyma.16G211032.1	Glyma.16G211032	PF00307	PF03810	PF00646	0.0884242	0.1522	0.169544
Glyma.16G135000.3	Glyma.16G135000	PF08172	PF10496	PF12325	0.111079	0.125981	0.392984
Glyma.16G166600.1	Glyma.16G166600	PF13499	PF00542	PF01814	0.0643963	0.0650413	0.172439
Glyma.16G006300.1	Glyma.16G006300	PF00690	PF01699	PF13962	0.032358	0.0590392	0.659991
Glyma.16G006300.2	Glyma.16G006300	PF00690	PF01699	PF13962	0.032358	0.0590392	0.659991
Glyma.16G174300.1	Glyma.16G174300	PF14372	PF03936	PF13456	0.0588575	0.0706504	0.169579
Glyma.16G205800.1	Glyma.16G205800	PF10551	PF00069	PF00134	0.0305182	0.0361902	0.0375529
Glyma.16G217500.1	Glyma.16G217500	PF01259	PF13378	PF00903	0.0628332	0.179871	0.195104
Glyma.16G000800.2	Glyma.16G000800	PF01541	PF00069	PF00271	0.0384618	0.042529	0.0787933
Glyma.16G000800.1	Glyma.16G000800	PF12776	PF00303	PF00059	0.0270047	0.0392142	0.0624153
Glyma.16G046800.1	Glyma.16G046800	PF11708	PF00249	PF00098	0.0482675	0.0620144	0.744255
Glyma.16G017300.1	Glyma.16G017300	PF00125	PF07714	PF00069	1.0548e-05	0.00682117	0.993152
Glyma.16G017300.7	Glyma.16G017300	PF00125	PF07714	PF00069	7.17065e-06	0.00789217	0.992088
Glyma.16G095000.2	Glyma.16G095000	PF09745	PF12325	PF08172	0.0473118	0.19892	0.43572
Glyma.16G201700.1	Glyma.16G201700	PF12708	PF01915	PF00082	0.000130774	0.0004129	0.99833
Glyma.16G034000.1	Glyma.16G034000	PF07885	PF00646	PF00134	0.0273838	0.0279549	0.0649596
Glyma.16G072900.1	Glyma.16G072900	PF08387	PF12937	PF00646	0.0558603	0.0846688	0.343595
Glyma.16G179250.1	Glyma.16G179250	PF00098	PF02892	PF13966	0.067065	0.0710833	0.264141
Glyma.16G136800.2	Glyma.16G136800	PF18036	PF08585	PF00581	0.0497085	0.0844865	0.156186
Glyma.16G136800.1	Glyma.16G136800	PF13091	PF00168	PF07727	0.0679278	0.0822699	0.0831964
Glyma.16G117900.1	Glyma.16G117900	PF00542	PF12656	PF04774	0.0722076	0.0987148	0.155595
Glyma.16G157400.1	Glyma.16G157400	PF00089	PF07714	PF00069	0.000382282	0.0276122	0.971874
Glyma.16G008950.1	Glyma.16G008950	PF00892	PF08627	PF01699	0.000608189	0.000817221	0.997568
Glyma.16G101500.1	Glyma.16G101500	PF00010	PF07714	PF00069	2.09037e-06	0.0268226	0.97317
Glyma.16G101500.2	Glyma.16G101500	PF00010	PF07714	PF00069	2.09037e-06	0.0268226	0.97317
Glyma.16G101500.3	Glyma.16G101500	PF00010	PF07714	PF00069	1.68968e-06	0.0252184	0.974773
Glyma.16G029500.1	Glyma.16G029500	PF05239	PF02362	PF01176	8.38942e-06	1.11562e-05	0.999927
Glyma.16G191600.1	Glyma.16G191600	PF00635	PF05047	PF13225	0.0416593	0.0474462	0.176691
Glyma.16G171500.1	Glyma.16G171500	PF00059	PF00754	PF00141	0.0769605	0.123999	0.22539
Glyma.16G170500.1	Glyma.16G170500	PF00498	PF13976	PF00098	0.065379	0.0727388	0.29496
Glyma.16G170500.3	Glyma.16G170500	PF00564	PF00498	PF10497	0.0764414	0.0975549	0.327048
Glyma.16G023200.1	Glyma.16G023200	PF17177	PF12862	PF17874	0.0384944	0.131999	0.819934
Glyma.16G023850.1	Glyma.16G023850	PF00091	PF13456	PF00089	0.0348553	0.0358979	0.0602774
Glyma.16G023850.2	Glyma.16G023850	PF00091	PF13456	PF00089	0.0348553	0.0358979	0.0602774
Glyma.16G192666.1	Glyma.16G192666	PF00635	PF00011	PF00168	0.0706679	0.117358	0.12846
Glyma.16G192666.2	Glyma.16G192666	PF00248	PF05047	PF00102	0.0459148	0.0511222	0.0559246
Glyma.16G192666.3	Glyma.16G192666	PF05047	PF00248	PF00685	0.0445815	0.05158	0.0731352
Glyma.16G192666.4	Glyma.16G192666	PF00069	PF07714	PF00248	0.0515306	0.0627538	0.10407
Glyma.16G111800.1	Glyma.16G111800	PF01734	PF07714	PF00069	0.000361982	0.0291473	0.969149
Glyma.16G111800.2	Glyma.16G111800	PF01636	PF07714	PF00069	5.3351e-05	0.0348699	0.964834
Glyma.16G111800.3	Glyma.16G111800	PF01734	PF07714	PF00069	7.3838e-05	0.0501672	0.949311
Glyma.16G111800.4	Glyma.16G111800	PF00089	PF07714	PF00069	8.89902e-05	0.0426837	0.956816
Glyma.16G111800.5	Glyma.16G111800	PF00089	PF07714	PF00069	9.19127e-05	0.0430398	0.956456
Glyma.16G100500.1	Glyma.16G100500	PF09588	PF01398	PF16561	0.0674527	0.0694746	0.138284
Glyma.16G031000.1	Glyma.16G031000	PF09430	PF03330	PF03168	0.00150795	0.00267062	0.989419
Glyma.16G039600.1	Glyma.16G039600	PF01593	PF00883	PF00144	0.0358726	0.0398595	0.453053
Glyma.16G133300.1	Glyma.16G133300	PF00171	PF10551	PF00650	0.000137424	0.000268616	0.998845
Glyma.16G071402.1	Glyma.16G071402	PF14111	PF13966	PF14244	0.0726817	0.153702	0.502651
Glyma.16G213400.1	Glyma.16G213400	PF00168	PF04695	PF06911	0.060691	0.0951457	0.109286
Glyma.16G213400.4	Glyma.16G213400	PF02037	PF04695	PF06911	0.0597516	0.0762442	0.0967185
Glyma.16G110300.1	Glyma.16G110300	PF08627	PF03151	PF00892	0.153406	0.278617	0.370414
Glyma.16G126300.1	Glyma.16G126300	PF07002	PF13519	PF00092	0.00406722	0.228687	0.764837
Glyma.16G126300.2	Glyma.16G126300	PF00696	PF13519	PF00092	0.0429526	0.104252	0.491836
Glyma.16G065500.2	Glyma.16G065500	PF02469	PF01273	PF00069	0.132389	0.206579	0.480581
Glyma.16G083200.1	Glyma.16G083200	PF00169	PF01712	PF02214	0.0597534	0.0746513	0.125111
Glyma.16G143900.2	Glyma.16G143900	PF04828	PF01844	PF02892	0.0793509	0.0991412	0.43754
Glyma.16G143900.3	Glyma.16G143900	PF04828	PF01844	PF02892	0.0950799	0.155102	0.370645
Glyma.16G065300.2	Glyma.16G065300	PF03016	PF13640	PF05686	0.0813311	0.10268	0.11102
Glyma.16G090101.1	Glyma.16G090101	PF00361	PF03151	PF00892	0.0649276	0.111584	0.125946
Glyma.16G151400.1	Glyma.16G151400	PF00168	PF01094	PF02602	0.039703	0.0654885	0.075009
Glyma.16G151400.2	Glyma.16G151400	PF00168	PF02581	PF01168	0.0516237	0.0638905	0.0673062
Glyma.16G190400.1	Glyma.16G190400	PF00128	PF07714	PF00069	0.036645	0.0878065	0.520898
Glyma.16G160400.1	Glyma.16G160400	PF00501	PF07731	PF13456	0.0373094	0.0379272	0.0532708
Glyma.16G105200.1	Glyma.16G105200	PF00646	PF14372	PF05699	0.0460052	0.0905308	0.153893
Glyma.16G105200.4	Glyma.16G105200	PF00646	PF14372	PF05699	0.0407969	0.0854586	0.104524
Glyma.16G105200.3	Glyma.16G105200	PF00931	PF14372	PF05699	0.0396808	0.0646364	0.080013
Glyma.16G105200.2	Glyma.16G105200	PF00646	PF14372	PF05699	0.0496109	0.0789646	0.0903962
Glyma.16G170600.1	Glyma.16G170600	PF00999	PF00361	PF00134	0.0463009	0.0560476	0.0618008
Glyma.16G218900.3	Glyma.16G218900	PF12776	PF10545	PF00249	0.00553337	0.0171132	0.973189
Glyma.16G218900.1	Glyma.16G218900	PF12776	PF10545	PF00249	0.00347731	0.0122752	0.982078
Glyma.16G110700.1	Glyma.16G110700	PF02721	PF00168	PF04601	0.0610793	0.0902235	0.281471
Glyma.16G110700.2	Glyma.16G110700	PF02721	PF00168	PF04601	0.0610793	0.0902235	0.281471
Glyma.16G110700.3	Glyma.16G110700	PF01648	PF04601	PF13532	0.0503518	0.101121	0.161249
Glyma.16G110700.4	Glyma.16G110700	PF01648	PF04601	PF13532	0.0503518	0.101121	0.161249
Glyma.16G110700.7	Glyma.16G110700	PF04601	PF02721	PF00168	0.0322602	0.0524886	0.0792036
Glyma.16G110700.5	Glyma.16G110700	PF04601	PF02721	PF00168	0.0322602	0.0524886	0.0792036
Glyma.16G110700.6	Glyma.16G110700	PF04601	PF02721	PF00168	0.0322602	0.0524886	0.0792036
Glyma.16G135600.2	Glyma.16G135600	PF01541	PF05699	PF00505	0.0279388	0.0339419	0.320921
Glyma.16G135600.1	Glyma.16G135600	PF05687	PF00505	PF08031	0.0392434	0.0642732	0.066198
Glyma.16G145900.3	Glyma.16G145900	PF02453	PF08510	PF06454	0.13788	0.280329	0.343986
Glyma.16G059000.1	Glyma.16G059000	PF02581	PF01180	PF00215	0.0531886	0.146412	0.716202
Glyma.16G038100.1	Glyma.16G038100	PF05678	PF05703	PF05699	0.0234975	0.0244457	0.334625
Glyma.16G058850.1	Glyma.16G058850	PF05699	PF04043	PF00141	0.0173925	0.0234949	0.0639645
Glyma.16G165600.1	Glyma.16G165600	PF16421	PF07839	PF02037	0.0354253	0.0491299	0.0807035
Glyma.16G165600.2	Glyma.16G165600	PF16421	PF07839	PF02037	0.0354253	0.0491299	0.0807035
Glyma.16G141300.1	Glyma.16G141300	PF13649	PF01170	PF08241	0.106655	0.131485	0.307115
Glyma.16G144100.1	Glyma.16G144100	PF00505	PF16987	PF00010	0.0251724	0.0481957	0.547894
Glyma.16G157800.1	Glyma.16G157800	PF01061	PF06454	PF03798	0.067845	0.203321	0.221741
Glyma.16G115533.1	Glyma.16G115533	PF05699	PF12937	PF00646	0.0480168	0.193608	0.438952
Glyma.16G192400.1	Glyma.16G192400	PF00534	PF05686	PF00685	0.0635798	0.246336	0.26126
Glyma.16G094100.1	Glyma.16G094100	PF00089	PF17942	PF01565	0.0611795	0.0987171	0.275253
Glyma.16G089400.1	Glyma.16G089400	PF06391	PF00097	PF13639	0.0769685	0.27457	0.281577
Glyma.16G087600.1	Glyma.16G087600	PF01553	PF13632	PF00535	0.000455146	0.0777641	0.920066
Glyma.16G183550.1	Glyma.16G183550	PF00026	PF03024	PF00059	0.0777356	0.0779658	0.147558
Glyma.16G183550.2	Glyma.16G183550	PF00026	PF03024	PF00059	0.0777356	0.0779658	0.147558
Glyma.16G020300.1	Glyma.16G020300	PF13962	PF10260	PF08510	0.0330019	0.0515335	0.623605
Glyma.16G020300.3	Glyma.16G020300	PF13962	PF10260	PF08510	0.0330019	0.0515335	0.623605
Glyma.16G056700.1	Glyma.16G056700	PF08609	PF02201	PF00631	0.0778289	0.0986274	0.112233
Glyma.16G083800.1	Glyma.16G083800	PF00168	PF00498	PF00069	0.0481184	0.0595508	0.171932
Glyma.16G083800.2	Glyma.16G083800	PF13426	PF00498	PF01336	0.0583778	0.0587315	0.360045
Glyma.16G023800.1	Glyma.16G023800	PF00249	PF00248	PF05687	0.0829637	0.157839	0.222256
Glyma.16G164700.1	Glyma.16G164700	PF01494	PF07889	PF02737	0.0356856	0.0836338	0.162925
Glyma.16G164700.3	Glyma.16G164700	PF00252	PF00035	PF05047	0.0736844	0.0817353	0.167295
Glyma.16G164700.2	Glyma.16G164700	PF00382	PF00188	PF00244	0.033952	0.0666187	0.136897
Glyma.16G110600.2	Glyma.16G110600	PF14368	PF00234	PF12999	0.0696704	0.0970194	0.0987005
Glyma.16G153900.2	Glyma.16G153900	PF13720	PF00082	PF00080	8.0398e-05	0.000364201	0.999446
Glyma.16G113000.1	Glyma.16G113000	PF00478	PF02581	PF01180	0.0821696	0.268069	0.518602
Glyma.16G113000.2	Glyma.16G113000	PF01137	PF00109	PF06911	0.0429817	0.0575097	0.059745
Glyma.16G006900.2	Glyma.16G006900	PF13472	PF00657	PF00149	0.00801964	0.0101272	0.969292
Glyma.16G006900.3	Glyma.16G006900	PF13472	PF00657	PF00149	0.00801964	0.0101272	0.969292
Glyma.16G006900.4	Glyma.16G006900	PF00657	PF01872	PF00149	0.0126386	0.0226961	0.931126
Glyma.16G123700.1	Glyma.16G123700	PF06803	PF00808	PF01466	4.03872e-05	4.48138e-05	0.9998
Glyma.16G105500.1	Glyma.16G105500	PF00916	PF00955	PF00999	0.165113	0.186292	0.345686
Glyma.16G159900.1	Glyma.16G159900	PF10419	PF00635	PF00168	0.0533298	0.0707894	0.435156
Glyma.16G073600.1	Glyma.16G073600	PF03446	PF08240	PF00107	0.000466843	0.0150465	0.98335
Glyma.16G192100.2	Glyma.16G192100	PF00168	PF00141	PF00307	0.0391426	0.0427997	0.50705
Glyma.16G021700.2	Glyma.16G021700	PF06414	PF01656	PF00004	0.0603578	0.073154	0.609702
Glyma.16G187100.2	Glyma.16G187100	PF12937	PF01823	PF00646	0.0735084	0.0855307	0.482744
Glyma.16G128700.1	Glyma.16G128700	PF13532	PF14226	PF03171	0.000418704	0.000783773	0.998097
Glyma.16G078700.1	Glyma.16G078700	PF00754	PF00059	PF13456	0.0482597	0.11123	0.113082
Glyma.16G029400.1	Glyma.16G029400	PF02270	PF00327	PF00505	0.0523523	0.0613703	0.143001
Glyma.16G090500.1	Glyma.16G090500	PF05687	PF07145	PF05678	0.0391586	0.0538645	0.203168
Glyma.16G169900.3	Glyma.16G169900	PF00646	PF00443	PF00069	0.0788962	0.0827407	0.165226
Glyma.16G118900.1	Glyma.16G118900	PF01205	PF15985	PF00180	1.81292e-05	4.70929e-05	0.999876
Glyma.16G099500.1	Glyma.16G099500	PF01844	PF12171	PF13976	0.0773442	0.120973	0.150191
Glyma.16G047300.1	Glyma.16G047300	PF01636	PF07714	PF00069	0.00194378	0.0467874	0.950259
Glyma.16G068800.1	Glyma.16G068800	PF00112	PF13472	PF00657	0.000304649	0.0880676	0.911091
Glyma.16G063050.1	Glyma.16G063050	PF14703	PF01775	PF05699	0.0377001	0.0439957	0.0746589
Glyma.16G156400.1	Glyma.16G156400	PF02892	PF12756	PF12171	0.0403908	0.0680295	0.786337
Glyma.16G030402.1	Glyma.16G030402	PF10172	PF03151	PF05678	0.043688	0.0439698	0.133132
Glyma.16G113200.1	Glyma.16G113200	PF00246	PF00497	PF03572	0.0699768	0.073982	0.0996105
Glyma.16G002400.1	Glyma.16G002400	PF00454	PF07714	PF00069	1.33123e-05	0.0208358	0.979134
Glyma.16G002400.2	Glyma.16G002400	PF00454	PF07714	PF00069	4.9323e-05	0.0244907	0.975438
Glyma.16G168100.1	Glyma.16G168100	PF00141	PF00635	PF17135	0.0378498	0.105451	0.115483
Glyma.16G156200.1	Glyma.16G156200	PF00102	PF07714	PF00069	0.000250154	0.0443137	0.953818
Glyma.16G156200.2	Glyma.16G156200	PF00026	PF07714	PF00069	0.00026773	0.0529572	0.945195
Glyma.16G067000.1	Glyma.16G067000	PF00168	PF05641	PF17780	0.071959	0.111024	0.189135
Glyma.16G125266.1	Glyma.16G125266	PF00754	PF01823	PF00646	0.0753533	0.215346	0.231887
Glyma.16G087251.1	Glyma.16G087251	PF02453	PF13968	PF03798	0.0455814	0.0571378	0.151161
Glyma.16G188032.1	Glyma.16G188032	PF01273	PF14244	PF00307	0.0833248	0.0910373	0.205063
Glyma.16G164400.1	Glyma.16G164400	PF02469	PF04043	PF00141	4.20458e-05	4.38332e-05	0.999853
Glyma.16G117567.1	Glyma.16G117567	PF09764	PF10551	PF04446	0.00214843	0.0074525	0.974894
Glyma.16G062700.2	Glyma.16G062700	PF00651	PF12931	PF12796	0.016816	0.0634759	0.686589
Glyma.16G041600.1	Glyma.16G041600	PF03468	PF11926	PF00168	0.0700529	0.172574	0.280257
Glyma.16G116300.1	Glyma.16G116300	PF03763	PF06886	PF00505	0.00109488	0.0229486	0.97425
Glyma.16G116300.3	Glyma.16G116300	PF03763	PF06886	PF00505	0.00109727	0.0229617	0.974221
Glyma.16G082200.1	Glyma.16G082200	PF01370	PF05368	PF13460	0.031264	0.353334	0.523428
Glyma.16G082200.4	Glyma.16G082200	PF01370	PF05368	PF13460	0.0471246	0.17753	0.670367
Glyma.16G071000.1	Glyma.16G071000	PF01926	PF06472	PF00005	0.000205183	0.070245	0.927955
Glyma.16G071000.4	Glyma.16G071000	PF01926	PF06472	PF00005	0.00154579	0.00656156	0.987489
Glyma.16G206300.1	Glyma.16G206300	PF11721	PF00026	PF14543	0.0851658	0.0855903	0.258994
Glyma.16G087100.1	Glyma.16G087100	PF17874	PF00004	PF00931	0.0246316	0.0520461	0.773092
Glyma.16G087100.2	Glyma.16G087100	PF13401	PF00004	PF00931	0.0191218	0.0443816	0.821493
Glyma.16G087100.3	Glyma.16G087100	PF13401	PF00004	PF00931	0.0152446	0.0226361	0.91239
Glyma.16G210100.1	Glyma.16G210100	PF01636	PF07714	PF00069	2.0736e-05	0.0392578	0.96067
Glyma.16G210100.3	Glyma.16G210100	PF01636	PF07714	PF00069	1.56779e-05	0.0483764	0.95156
Glyma.16G210100.2	Glyma.16G210100	PF01636	PF07714	PF00069	1.56779e-05	0.0483764	0.95156
Glyma.16G140700.1	Glyma.16G140700	PF00454	PF07714	PF00069	2.65565e-05	0.0148359	0.985125
Glyma.16G175200.1	Glyma.16G175200	PF00534	PF07859	PF13579	0.117392	0.149822	0.241227
Glyma.16G157100.1	Glyma.16G157100	PF00909	PF00361	PF13906	0.139119	0.194077	0.362823
Glyma.16G157100.2	Glyma.16G157100	PF01699	PF00909	PF13906	0.13963	0.142028	0.373569
Glyma.16G134500.1	Glyma.16G134500	PF08241	PF00534	PF00551	0.063789	0.0656131	0.11526
Glyma.16G199700.1	Glyma.16G199700	PF16916	PF14432	PF17177	0.0155344	0.207668	0.705123
Glyma.16G144800.1	Glyma.16G144800	PF12014	PF00076	PF12928	0.0452393	0.0461773	0.124026
Glyma.16G144800.2	Glyma.16G144800	PF01167	PF00168	PF12014	0.0712138	0.100358	0.211753
Glyma.16G219500.1	Glyma.16G219500	PF00365	PF00180	PF00248	1.52339e-07	3.76925e-07	0.999999
Glyma.16G219500.2	Glyma.16G219500	PF14111	PF13302	PF00248	0.0133309	0.0403076	0.820038
Glyma.16G067200.1	Glyma.16G067200	PF00856	PF12796	PF13456	0.0959158	0.101394	0.198937
Glyma.16G062600.1	Glyma.16G062600	PF13962	PF13906	PF07884	0.101517	0.123606	0.166708
Glyma.16G019200.2	Glyma.16G019200	PF00059	PF00089	PF00754	0.0369841	0.0559165	0.234238
Glyma.16G010100.1	Glyma.16G010100	PF02362	PF04059	PF00076	0.000765596	0.00445805	0.991584
Glyma.16G182900.2	Glyma.16G182900	PF00144	PF00413	PF00026	0.0319704	0.0362993	0.122689
Glyma.16G182900.1	Glyma.16G182900	PF13640	PF02469	PF00026	0.0468211	0.0528179	0.0791913
Glyma.16G060000.2	Glyma.16G060000	PF00536	PF00443	PF04825	0.0626313	0.1567	0.210856
Glyma.16G060000.3	Glyma.16G060000	PF00536	PF00564	PF04825	0.0351858	0.0483177	0.513675
Glyma.16G060000.1	Glyma.16G060000	PF00564	PF04824	PF04825	0.0419026	0.0654758	0.678493
Glyma.16G060000.4	Glyma.16G060000	PF00564	PF04824	PF04825	0.0355176	0.0609452	0.731842
Glyma.16G060000.5	Glyma.16G060000	PF15862	PF04824	PF04825	0.064677	0.125981	0.565646
Glyma.16G060000.6	Glyma.16G060000	PF11976	PF13902	PF04824	0.0697779	0.123394	0.202989
Glyma.16G060000.7	Glyma.16G060000	PF13902	PF11976	PF04824	0.0722015	0.0738712	0.170467
Glyma.16G180900.1	Glyma.16G180900	PF03151	PF01699	PF00892	0.12845	0.195066	0.246125
Glyma.16G050800.1	Glyma.16G050800	PF08547	PF00754	PF00139	0.0956361	0.114339	0.126678
Glyma.16G050800.2	Glyma.16G050800	PF02018	PF00174	PF00754	0.0627335	0.140505	0.238285
Glyma.16G194400.1	Glyma.16G194400	PF10382	PF09133	PF00855	0.0487568	0.0903318	0.403558
Glyma.16G194400.2	Glyma.16G194400	PF09133	PF00035	PF00855	0.040871	0.0687755	0.328761
Glyma.16G220850.1	Glyma.16G220850	PF00481	PF00141	PF00550	0.0450411	0.0505328	0.113896
Glyma.16G030800.1	Glyma.16G030800	PF05686	PF13649	PF08241	0.0933834	0.130806	0.288733
Glyma.16G030800.2	Glyma.16G030800	PF13847	PF13649	PF08241	0.122919	0.180499	0.46768
Glyma.16G010600.1	Glyma.16G010600	PF07727	PF01423	PF13976	0.0784633	0.12665	0.129489
Glyma.16G138200.1	Glyma.16G138200	PF00754	PF01243	PF00168	0.0248376	0.0294636	0.6716
Glyma.16G004550.1	Glyma.16G004550	PF13878	PF00168	PF14111	0.0491303	0.135051	0.153418
Glyma.16G176500.2	Glyma.16G176500	PF03962	PF14303	PF06991	0.0434121	0.0876573	0.112667
Glyma.16G176500.1	Glyma.16G176500	PF12171	PF04419	PF00076	0.0469819	0.0606633	0.079666
Glyma.16G118400.9	Glyma.16G118400	PF13881	PF14560	PF11976	0.0125011	0.0274955	0.940993
Glyma.16G118400.1	Glyma.16G118400	PF14560	PF13881	PF11976	0.00587219	0.0115101	0.972587
Glyma.16G118400.2	Glyma.16G118400	PF14560	PF13881	PF11976	0.00587219	0.0115101	0.972587
Glyma.16G118400.4	Glyma.16G118400	PF14560	PF13881	PF11976	0.00587219	0.0115101	0.972587
Glyma.16G118400.3	Glyma.16G118400	PF14560	PF13881	PF11976	0.00587219	0.0115101	0.972587
Glyma.16G118400.8	Glyma.16G118400	PF01423	PF13881	PF11976	0.00495457	0.00844266	0.973974
Glyma.16G118400.5	Glyma.16G118400	PF05236	PF02845	PF16987	0.0876263	0.162054	0.261906
Glyma.16G118400.6	Glyma.16G118400	PF04695	PF16740	PF16987	0.0631231	0.0683949	0.226615
Glyma.16G069000.1	Glyma.16G069000	PF11976	PF02037	PF16421	0.0548873	0.070463	0.387037
Glyma.16G069000.4	Glyma.16G069000	PF03941	PF07557	PF16421	0.0920205	0.117972	0.160061
Glyma.16G069000.2	Glyma.16G069000	PF07557	PF11976	PF16421	0.0716909	0.0765692	0.175333
Glyma.16G069000.9	Glyma.16G069000	PF00011	PF13919	PF00505	0.0583438	0.0586448	0.0914354
Glyma.16G025400.3	Glyma.16G025400	PF01590	PF07885	PF00027	4.57895e-05	0.000711593	0.999117
Glyma.16G025400.1	Glyma.16G025400	PF01590	PF07885	PF00027	4.57895e-05	0.000711593	0.999117
Glyma.16G025400.4	Glyma.16G025400	PF12166	PF00615	PF00060	0.0824286	0.138058	0.181774
Glyma.16G025400.5	Glyma.16G025400	PF12166	PF00615	PF00060	0.0824286	0.138058	0.181774
Glyma.16G164800.2	Glyma.16G164800	PF05920	PF00046	PF09405	0.11554	0.181319	0.197126
Glyma.16G164800.1	Glyma.16G164800	PF05920	PF00046	PF09405	0.11449	0.180735	0.199642
Glyma.16G164800.3	Glyma.16G164800	PF00505	PF00046	PF00447	0.0950144	0.101791	0.191199
Glyma.16G045802.1	Glyma.16G045802	PF03151	PF00361	PF13664	0.141542	0.205442	0.226488
Glyma.16G030600.1	Glyma.16G030600	PF07647	PF12325	PF08172	0.020138	0.213902	0.576089
Glyma.16G155200.1	Glyma.16G155200	PF00102	PF02893	PF01852	0.0108279	0.0154245	0.93805
Glyma.16G155200.4	Glyma.16G155200	PF00169	PF02893	PF01852	0.0226514	0.153877	0.713542
Glyma.16G155200.5	Glyma.16G155200	PF00169	PF02893	PF01852	0.0226514	0.153877	0.713542
Glyma.16G155200.2	Glyma.16G155200	PF07059	PF02893	PF01852	0.00390179	0.00974141	0.95025
Glyma.16G017800.5	Glyma.16G017800	PF02453	PF00689	PF01699	0.0740541	0.237226	0.306768
Glyma.16G017800.6	Glyma.16G017800	PF02453	PF00689	PF01699	0.0740541	0.237226	0.306768
Glyma.16G017800.2	Glyma.16G017800	PF01699	PF00689	PF13968	0.136803	0.167319	0.221341
Glyma.16G017800.3	Glyma.16G017800	PF01699	PF00689	PF13968	0.136803	0.167319	0.221341
Glyma.16G198700.1	Glyma.16G198700	PF08627	PF00892	PF03151	0.126651	0.138351	0.191796
Glyma.16G093900.1	Glyma.16G093900	PF01636	PF07714	PF00069	6.96288e-05	0.0381119	0.961712
Glyma.16G093900.4	Glyma.16G093900	PF00089	PF07714	PF00069	4.02718e-06	0.0204156	0.979569
Glyma.16G126601.1	Glyma.16G126601	PF05699	PF02771	PF00501	0.0283755	0.0393223	0.0579381
Glyma.16G094600.1	Glyma.16G094600	PF00125	PF00010	PF04419	0.0285935	0.0441505	0.844805
Glyma.16G094600.2	Glyma.16G094600	PF08648	PF04927	PF04419	0.00421601	0.00468705	0.964869
Glyma.16G083600.1	Glyma.16G083600	PF01575	PF00107	PF03061	0.0603366	0.0707586	0.1088
Glyma.16G032900.1	Glyma.16G032900	PF01636	PF07714	PF00069	1.1672e-05	0.015656	0.984316
Glyma.16G106500.1	Glyma.16G106500	PF01852	PF09588	PF13456	0.0681537	0.0861104	0.106189
Glyma.16G106500.2	Glyma.16G106500	PF00155	PF00501	PF00248	0.062315	0.0706535	0.346139
Glyma.16G009900.1	Glyma.16G009900	PF01636	PF07714	PF00069	3.89157e-05	0.0303261	0.969524
Glyma.16G141200.3	Glyma.16G141200	PF00294	PF00481	PF07228	2.64121e-05	0.101456	0.898386
Glyma.16G141200.5	Glyma.16G141200	PF00557	PF00481	PF07228	1.46732e-05	0.0259495	0.973968
Glyma.16G180700.2	Glyma.16G180700	PF13962	PF00892	PF01699	0.0956086	0.298673	0.360215
Glyma.16G072300.2	Glyma.16G072300	PF00564	PF04675	PF00271	0.0335166	0.155238	0.360158
Glyma.16G072300.3	Glyma.16G072300	PF00564	PF04675	PF00168	0.0869563	0.0952639	0.0987456
Glyma.16G072300.4	Glyma.16G072300	PF00567	PF00168	PF00271	0.0864474	0.0881973	0.0927838
Glyma.16G209100.1	Glyma.16G209100	PF13716	PF00571	PF00650	0.039404	0.0632062	0.105964
Glyma.16G014800.1	Glyma.16G014800	PF08323	PF00685	PF00534	0.0462004	0.0682033	0.15146
Glyma.16G014800.2	Glyma.16G014800	PF00690	PF08241	PF00501	0.0647222	0.113379	0.178708
Glyma.16G061800.1	Glyma.16G061800	PF00060	PF04536	PF00497	0.0308192	0.158058	0.733261
Glyma.16G061800.3	Glyma.16G061800	PF00060	PF04536	PF00497	0.0164993	0.124839	0.79322
Glyma.16G061800.2	Glyma.16G061800	PF04536	PF00060	PF00497	0.0899692	0.391381	0.392503
Glyma.16G110100.1	Glyma.16G110100	PF02463	PF01926	PF00005	0.00340397	0.00518901	0.987486
Glyma.16G110100.2	Glyma.16G110100	PF02463	PF01926	PF00005	0.00172299	0.00242617	0.992371
Glyma.16G187400.2	Glyma.16G187400	PF00059	PF00069	PF00754	0.0834836	0.133819	0.203157
Glyma.16G020100.1	Glyma.16G020100	PF02540	PF00089	PF01565	0.0326076	0.0515731	0.849063
Glyma.16G193400.1	Glyma.16G193400	PF14547	PF14368	PF00234	0.0170005	0.276632	0.705446
Glyma.16G055900.1	Glyma.16G055900	PF00080	PF04043	PF00141	1.00235e-07	9.83023e-07	0.999999
Glyma.16G178000.1	Glyma.16G178000	PF01106	PF01883	PF00403	0.000612806	0.00188773	0.997004
Glyma.16G060900.1	Glyma.16G060900	PF00254	PF07883	PF00190	5.10322e-05	0.0427054	0.957177
Glyma.16G185800.2	Glyma.16G185800	PF00646	PF00307	PF00069	0.0844208	0.101817	0.179911
Glyma.16G027800.1	Glyma.16G027800	PF00916	PF01699	PF00999	0.0887147	0.258917	0.488185
Glyma.16G125800.1	Glyma.16G125800	PF00026	PF11721	PF00069	0.167389	0.213923	0.219278
Glyma.16G213000.1	Glyma.16G213000	PF03467	PF00855	PF09133	0.158826	0.225207	0.277296
Glyma.16G213000.2	Glyma.16G213000	PF06886	PF09133	PF00855	0.0883229	0.167696	0.296621
Glyma.16G129200.3	Glyma.16G129200	PF09177	PF00307	PF03469	0.0860133	0.113492	0.379996
Glyma.16G103500.4	Glyma.16G103500	PF15628	PF00102	PF00246	0.145874	0.170519	0.199348
Glyma.16G103500.5	Glyma.16G103500	PF15628	PF00102	PF00246	0.097837	0.127351	0.154625
Glyma.16G103500.6	Glyma.16G103500	PF08652	PF00102	PF01170	0.134851	0.216548	0.220043
Glyma.16G103500.1	Glyma.16G103500	PF00089	PF01852	PF00246	0.107619	0.169322	0.245347
Glyma.16G187500.3	Glyma.16G187500	PF00622	PF00026	PF09412	0.0635496	0.0926547	0.107847
Glyma.16G187500.4	Glyma.16G187500	PF00622	PF00026	PF09412	0.0635496	0.0926547	0.107847
Glyma.16G187500.1	Glyma.16G187500	PF00622	PF00026	PF09412	0.0454293	0.0589698	0.166739
Glyma.16G187500.5	Glyma.16G187500	PF00622	PF00026	PF09412	0.0454293	0.0589698	0.166739
Glyma.16G187500.6	Glyma.16G187500	PF05686	PF00188	PF00059	0.0262634	0.0546804	0.509748
Glyma.16G043200.1	Glyma.16G043200	PF00505	PF00168	PF10545	0.0622855	0.0756234	0.171728
Glyma.16G178900.1	Glyma.16G178900	PF00251	PF00497	PF03088	0.0994922	0.102697	0.251985
Glyma.16G042300.1	Glyma.16G042300	PF08790	PF10497	PF04438	0.0560745	0.124348	0.145989
Glyma.16G131400.1	Glyma.16G131400	PF02298	PF00031	PF01105	0.0491444	0.0534273	0.075402
Glyma.16G019700.1	Glyma.16G019700	PF07651	PF14780	PF13178	0.000606717	0.000943691	0.99664
Glyma.16G019700.2	Glyma.16G019700	PF07651	PF01417	PF13178	0.0017059	0.00888333	0.984347
Glyma.16G151700.1	Glyma.16G151700	PF00365	PF00092	PF01138	0.0300055	0.0410459	0.591672
Glyma.16G106351.1	Glyma.16G106351	PF16205	PF04970	PF00089	0.037382	0.098206	0.16551
Glyma.16G106351.2	Glyma.16G106351	PF03719	PF00189	PF00089	0.080319	0.106529	0.167971
Glyma.16G154000.1	Glyma.16G154000	PF02737	PF01565	PF00091	0.000340875	0.00308141	0.995221
Glyma.16G154000.2	Glyma.16G154000	PF01073	PF01370	PF01565	0.080127	0.0941037	0.138034
Glyma.16G108900.1	Glyma.16G108900	PF00890	PF00732	PF05199	0.116874	0.198807	0.324503
Glyma.16G101200.1	Glyma.16G101200	PF07883	PF00149	PF00190	0.0436615	0.0544217	0.073465
Glyma.16G085300.1	Glyma.16G085300	PF13328	PF01814	PF00248	0.0561436	0.0798372	0.111394
Glyma.16G198800.1	Glyma.16G198800	PF05920	PF07647	PF00249	0.0295504	0.03842	0.69362
Glyma.16G105700.1	Glyma.16G105700	PF02453	PF00689	PF01699	0.0504486	0.0545845	0.0545865
Glyma.16G125000.1	Glyma.16G125000	PF05703	PF00481	PF06911	0.000413719	0.00116014	0.996763
Glyma.16G035600.1	Glyma.16G035600	PF12796	PF14432	PF17177	0.0456282	0.451356	0.452461
Glyma.16G000600.1	Glyma.16G000600	PF11717	PF03101	PF00319	0.0589993	0.147718	0.373278
Glyma.16G137000.6	Glyma.16G137000	PF12937	PF00646	PF00931	0.107778	0.176192	0.553017
Glyma.16G137000.7	Glyma.16G137000	PF12937	PF00646	PF00931	0.0667365	0.115734	0.636896
Glyma.16G137000.8	Glyma.16G137000	PF12937	PF00646	PF00931	0.074904	0.14088	0.620312
Glyma.16G137000.9	Glyma.16G137000	PF12937	PF00646	PF00931	0.074904	0.14088	0.620312
Glyma.16G137000.1	Glyma.16G137000	PF12937	PF00646	PF00931	0.074904	0.14088	0.620312
Glyma.16G137000.10	Glyma.16G137000	PF12937	PF08387	PF00646	0.206456	0.229705	0.38971
Glyma.16G164200.1	Glyma.16G164200	PF04043	PF00481	PF00141	3.19929e-06	3.21701e-06	0.999985
Glyma.16G064700.4	Glyma.16G064700	PF13664	PF02453	PF00137	0.114218	0.122059	0.184038
Glyma.16G064700.5	Glyma.16G064700	PF13664	PF02453	PF00137	0.114218	0.122059	0.184038
Glyma.16G123900.1	Glyma.16G123900	PF08387	PF12937	PF00646	0.0248252	0.169711	0.766155
Glyma.16G016600.1	Glyma.16G016600	PF02362	PF11926	PF05641	0.039434	0.0433017	0.146964
Glyma.16G128140.1	Glyma.16G128140	PF00330	PF00111	PF08240	0.0515654	0.0629275	0.442238
Glyma.16G078400.1	Glyma.16G078400	PF00266	PF13632	PF00535	0.0031091	0.339502	0.646418
Glyma.16G058500.1	Glyma.16G058500	PF06839	PF09133	PF09816	0.150305	0.196153	0.22245
Glyma.16G045400.1	Glyma.16G045400	PF13442	PF01844	PF10276	0.052879	0.0618624	0.194497
Glyma.16G007200.1	Glyma.16G007200	PF10545	PF12776	PF00249	0.00457832	0.00827198	0.985808
Glyma.16G152100.1	Glyma.16G152100	PF00505	PF12776	PF00855	0.0511198	0.103879	0.337728
Glyma.16G111100.1	Glyma.16G111100	PF00176	PF14111	PF14244	0.046829	0.0538761	0.118144
Glyma.16G111100.2	Glyma.16G111100	PF00176	PF14111	PF14244	0.046829	0.0538761	0.118144
Glyma.16G217200.1	Glyma.16G217200	PF08323	PF13844	PF00534	0.0185197	0.024114	0.906893
Glyma.16G217200.2	Glyma.16G217200	PF08323	PF13844	PF00534	0.020267	0.0330575	0.901122
Glyma.16G185300.1	Glyma.16G185300	PF00128	PF11721	PF02469	0.0885477	0.185371	0.2988
Glyma.16G033600.1	Glyma.16G033600	PF00144	PF00288	PF03007	0.0446367	0.0662174	0.0804263
Glyma.16G114700.1	Glyma.16G114700	PF13639	PF03372	PF00149	8.85126e-05	0.000362889	0.998995
Glyma.16G114700.2	Glyma.16G114700	PF00069	PF03372	PF00149	0.000134964	0.00110401	0.997699
Glyma.16G007900.1	Glyma.16G007900	PF05899	PF07883	PF00190	0.00599072	0.0916724	0.895952
Glyma.16G143300.1	Glyma.16G143300	PF04043	PF01464	PF00188	0.000353669	0.00137412	0.997547
Glyma.16G058600.1	Glyma.16G058600	PF00248	PF13961	PF05699	0.0446888	0.0495471	0.132003
Glyma.16G096400.3	Glyma.16G096400	PF00168	PF00024	PF00089	0.0881666	0.118272	0.395493
Glyma.16G096400.4	Glyma.16G096400	PF00141	PF00024	PF00168	0.0968375	0.137211	0.218535
Glyma.16G096400.5	Glyma.16G096400	PF00141	PF00024	PF00168	0.0968375	0.137211	0.218535
Glyma.16G096400.6	Glyma.16G096400	PF00141	PF00024	PF00168	0.0968375	0.137211	0.218535
Glyma.16G096400.7	Glyma.16G096400	PF00141	PF00646	PF01167	0.0524909	0.0588212	0.110831
Glyma.16G096400.8	Glyma.16G096400	PF00141	PF00646	PF01167	0.0524909	0.0588212	0.110831
Glyma.16G096400.9	Glyma.16G096400	PF00141	PF00646	PF01167	0.0524909	0.0588212	0.110831
Glyma.16G096400.10	Glyma.16G096400	PF00141	PF00646	PF01167	0.0524909	0.0588212	0.110831
Glyma.16G096400.1	Glyma.16G096400	PF00141	PF00089	PF00024	0.0410021	0.0618665	0.0877486
Glyma.16G041400.1	Glyma.16G041400	PF01423	PF01556	PF00076	0.0474445	0.0728761	0.591492
Glyma.16G068400.3	Glyma.16G068400	PF00884	PF00092	PF07002	0.000740199	0.00521308	0.992534
Glyma.16G192151.1	Glyma.16G192151	PF02854	PF13456	PF00307	0.0400774	0.0457265	0.0771442
Glyma.16G016800.1	Glyma.16G016800	PF00176	PF05047	PF00271	0.0210233	0.0215363	0.0262856
Glyma.16G152600.1	Glyma.16G152600	PF04389	PF00150	PF00704	0.058899	0.327369	0.412654
Glyma.16G005300.3	Glyma.16G005300	PF06574	PF05368	PF13460	0.0146594	0.067598	0.835201
Glyma.16G005300.4	Glyma.16G005300	PF06574	PF05368	PF13460	0.0146594	0.067598	0.835201
Glyma.16G005300.1	Glyma.16G005300	PF01370	PF05368	PF13460	0.019814	0.080267	0.813812
Glyma.16G005300.2	Glyma.16G005300	PF06574	PF05368	PF13460	0.0447161	0.0699811	0.73984
Glyma.16G184100.1	Glyma.16G184100	PF14547	PF14368	PF00234	0.0474205	0.309021	0.619548
Glyma.16G217900.1	Glyma.16G217900	PF00133	PF00182	PF00112	0.0546139	0.0563558	0.08927
Glyma.16G157600.1	Glyma.16G157600	PF06839	PF05699	PF13259	0.0464203	0.0608956	0.0643132
Glyma.16G135400.1	Glyma.16G135400	PF05687	PF00035	PF00505	0.0474105	0.0539368	0.0831208
Glyma.16G179300.11	Glyma.16G179300	PF00182	PF00059	PF00112	0.0502933	0.221585	0.371806
Glyma.16G021300.2	Glyma.16G021300	PF16561	PF02823	PF01172	0.0658792	0.074159	0.165714
Glyma.16G148800.1	Glyma.16G148800	PF00999	PF00361	PF00955	0.0986092	0.10974	0.140187
Glyma.16G087700.1	Glyma.16G087700	PF01778	PF01775	PF00252	0.0804176	0.155557	0.366539
Glyma.16G131600.1	Glyma.16G131600	PF13180	PF08585	PF00498	0.00675965	0.0188495	0.945322
Glyma.16G119900.1	Glyma.16G119900	PF01661	PF00596	PF00383	0.0342556	0.0378953	0.852829
Glyma.16G138500.1	Glyma.16G138500	PF10545	PF00505	PF00249	0.0144432	0.0232922	0.923165
Glyma.16G159550.1	Glyma.16G159550	PF01261	PF01902	PF00248	0.0609575	0.0666554	0.113081
Glyma.16G051500.1	Glyma.16G051500	PF09133	PF00168	PF01823	0.0670434	0.0880235	0.0995324
Glyma.16G022900.1	Glyma.16G022900	PF05920	PF05678	PF00046	0.0581986	0.0717552	0.125029
Glyma.16G079000.2	Glyma.16G079000	PF02469	PF00443	PF01273	0.0446286	0.0574513	0.483735
Glyma.16G013600.3	Glyma.16G013600	PF00168	PF07714	PF00069	0.0689179	0.0894965	0.212541
Glyma.16G013600.1	Glyma.16G013600	PF00168	PF06094	PF04266	0.0681018	0.104008	0.164742
Glyma.16G004400.1	Glyma.16G004400	PF01425	PF00364	PF00198	0.0218056	0.302355	0.511568
Glyma.16G004400.3	Glyma.16G004400	PF00673	PF00364	PF00198	0.0200447	0.337931	0.47437
Glyma.16G004400.4	Glyma.16G004400	PF00673	PF00364	PF00198	0.0200447	0.337931	0.47437
Glyma.16G098100.1	Glyma.16G098100	PF02878	PF00275	PF00883	0.0451309	0.104885	0.762392
Glyma.16G217000.1	Glyma.16G217000	PF03016	PF00487	PF04572	0.0342121	0.0605481	0.592695
Glyma.16G217000.2	Glyma.16G217000	PF03016	PF00487	PF04572	0.0342121	0.0605481	0.592695
Glyma.16G150700.1	Glyma.16G150700	PF00135	PF00576	PF07731	0.0580312	0.067904	0.222497
Glyma.16G150700.2	Glyma.16G150700	PF14543	PF07731	PF00026	0.0421334	0.132984	0.135056
Glyma.16G107350.1	Glyma.16G107350	PF13966	PF05699	PF10536	0.0480085	0.048016	0.0680122
Glyma.16G044600.2	Glyma.16G044600	PF01575	PF00622	PF00501	0.000169033	0.000221635	0.998658
Glyma.16G044600.3	Glyma.16G044600	PF01575	PF00622	PF00501	0.000325997	0.000339843	0.998313
Glyma.16G044600.1	Glyma.16G044600	PF01575	PF00622	PF00501	0.000325997	0.000339843	0.998313
Glyma.16G044600.4	Glyma.16G044600	PF02538	PF00622	PF00501	0.00114779	0.00164499	0.995359
Glyma.16G044600.5	Glyma.16G044600	PF00155	PF00622	PF00501	3.31214e-05	0.00032822	0.999382
Glyma.16G044600.6	Glyma.16G044600	PF00622	PF02538	PF00501	0.000197523	0.00171905	0.99742
Glyma.16G049700.1	Glyma.16G049700	PF13664	PF14368	PF00234	0.0648966	0.0794891	0.210147
Glyma.16G200100.1	Glyma.16G200100	PF10551	PF00155	PF00266	0.00778667	0.123545	0.851698
Glyma.16G204000.1	Glyma.16G204000	PF01138	PF00293	PF02861	0.00298476	0.00551154	0.977594
Glyma.16G041200.6	Glyma.16G041200	PF00109	PF01494	PF01565	0.0710681	0.0766841	0.236343
Glyma.16G041200.4	Glyma.16G041200	PF00171	PF00330	PF00109	0.048963	0.0644127	0.115014
Glyma.16G041200.2	Glyma.16G041200	PF00171	PF00330	PF00109	0.048963	0.0644127	0.115014
Glyma.16G041200.3	Glyma.16G041200	PF00171	PF00330	PF00109	0.0489629	0.0644128	0.115014
Glyma.16G041200.1	Glyma.16G041200	PF00171	PF00330	PF00109	0.0489629	0.0644128	0.115014
Glyma.16G132200.2	Glyma.16G132200	PF00189	PF00346	PF07727	0.0430885	0.0636558	0.160503
Glyma.16G022400.1	Glyma.16G022400	PF01627	PF01814	PF10419	0.0390859	0.049002	0.157499
Glyma.16G128600.2	Glyma.16G128600	PF02201	PF07714	PF00069	0.000158946	0.0100121	0.989761
Glyma.16G128600.4	Glyma.16G128600	PF02201	PF07714	PF00069	0.000158946	0.0100121	0.989761
Glyma.16G128600.3	Glyma.16G128600	PF02201	PF07714	PF00069	0.000158946	0.0100121	0.989761
Glyma.16G128600.1	Glyma.16G128600	PF02201	PF07714	PF00069	0.000158946	0.0100121	0.989761
Glyma.16G128600.5	Glyma.16G128600	PF00749	PF07714	PF00069	2.58449e-05	0.0204628	0.979422
Glyma.16G128600.6	Glyma.16G128600	PF02201	PF07714	PF00069	2.95253e-05	0.00951366	0.990426
Glyma.16G032400.1	Glyma.16G032400	PF01106	PF01883	PF00403	6.59621e-05	0.000719753	0.999076
Glyma.16G128080.1	Glyma.16G128080	PF00361	PF06803	PF07885	0.0729689	0.0833846	0.152229
Glyma.16G018300.1	Glyma.16G018300	PF02775	PF00456	PF00676	0.000687224	0.000907156	0.997917
Glyma.16G163966.1	Glyma.16G163966	PF07734	PF08268	PF00646	0.0195439	0.0216268	0.919441
Glyma.16G201100.2	Glyma.16G201100	PF12656	PF00249	PF00011	0.067335	0.0793646	0.0858326
Glyma.16G194100.1	Glyma.16G194100	PF00542	PF01471	PF00254	0.0684229	0.125768	0.586924
Glyma.16G182751.1	Glyma.16G182751	PF14560	PF12937	PF00646	0.106525	0.239333	0.384649
Glyma.16G171050.1	Glyma.16G171050	PF08547	PF00059	PF00754	0.0527071	0.21428	0.288752
Glyma.16G109000.1	Glyma.16G109000	PF01182	PF01823	PF00781	0.0356278	0.0450812	0.39328
Glyma.16G205400.1	Glyma.16G205400	PF07883	PF00190	PF05899	0.00694924	0.011768	0.979187
Glyma.16G123600.4	Glyma.16G123600	PF02179	PF10496	PF00210	0.0731932	0.116012	0.193222
Glyma.16G123600.5	Glyma.16G123600	PF02179	PF10496	PF00210	0.0731932	0.116012	0.193222
Glyma.16G123600.6	Glyma.16G123600	PF02179	PF10496	PF00210	0.0769835	0.100931	0.201933
Glyma.16G123600.2	Glyma.16G123600	PF02179	PF10496	PF00210	0.0769835	0.100931	0.201933
Glyma.16G123600.7	Glyma.16G123600	PF02179	PF10496	PF00210	0.0769835	0.100931	0.201933
Glyma.16G123600.8	Glyma.16G123600	PF00210	PF17855	PF10241	0.0476368	0.0708404	0.199117
Glyma.16G136532.1	Glyma.16G136532	PF14364	PF01765	PF00542	0.0479691	0.0660917	0.0723541
Glyma.16G037100.1	Glyma.16G037100	PF00999	PF00916	PF00955	0.0645563	0.0650195	0.359441
Glyma.16G062400.1	Glyma.16G062400	PF02453	PF06454	PF03798	0.0240247	0.102938	0.762832
Glyma.16G016700.1	Glyma.16G016700	PF07522	PF08662	PF05641	0.0529088	0.0984867	0.212669
Glyma.16G016700.2	Glyma.16G016700	PF04446	PF08662	PF05641	0.0599709	0.1312	0.16367
Glyma.16G197900.2	Glyma.16G197900	PF08387	PF12937	PF00646	0.00726862	0.249114	0.722433
Glyma.16G197900.3	Glyma.16G197900	PF08387	PF12937	PF00646	0.00726859	0.249114	0.722433
Glyma.16G058300.7	Glyma.16G058300	PF02036	PF01399	PF05916	0.0363141	0.0458223	0.780065
Glyma.16G158600.1	Glyma.16G158600	PF01248	PF05047	PF00635	0.0624251	0.12465	0.194673
Glyma.16G044800.2	Glyma.16G044800	PF12894	PF13088	PF12657	0.0894138	0.121566	0.455179
Glyma.16G044800.3	Glyma.16G044800	PF12894	PF13088	PF12657	0.0894138	0.121566	0.455179
Glyma.16G044800.1	Glyma.16G044800	PF12894	PF13088	PF08662	0.0967858	0.151722	0.278628
Glyma.16G022300.1	Glyma.16G022300	PF04059	PF03467	PF00076	0.000714424	0.000886222	0.997189
Glyma.16G022300.6	Glyma.16G022300	PF03467	PF04059	PF00076	0.000473099	0.00311902	0.994789
Glyma.16G022300.3	Glyma.16G022300	PF03467	PF04059	PF00076	0.000473099	0.00311902	0.994789
Glyma.16G022300.4	Glyma.16G022300	PF03467	PF04059	PF00076	0.000473099	0.00311902	0.994789
Glyma.16G022300.7	Glyma.16G022300	PF03467	PF04059	PF00076	0.000828675	0.00278488	0.994318
Glyma.16G073300.1	Glyma.16G073300	PF00651	PF13456	PF00550	0.0650444	0.110606	0.15392
Glyma.16G169700.1	Glyma.16G169700	PF11721	PF18266	PF02469	0.125118	0.173284	0.32518
Glyma.16G106300.1	Glyma.16G106300	PF17135	PF00252	PF00707	0.187103	0.274378	0.292498
Glyma.16G044166.1	Glyma.16G044166	PF12937	PF10536	PF00646	0.0322428	0.0651014	0.272738
Glyma.16G026700.1	Glyma.16G026700	PF10497	PF12656	PF11331	0.000677338	0.000701993	0.995571
Glyma.16G220200.1	Glyma.16G220200	PF01636	PF07714	PF00069	5.50015e-05	0.0254754	0.974445
Glyma.16G132500.1	Glyma.16G132500	PF00326	PF12697	PF00561	0.00692263	0.096667	0.8931
Glyma.16G101900.1	Glyma.16G101900	PF00685	PF00307	PF00650	0.0358334	0.047718	0.0530937
Glyma.16G101900.2	Glyma.16G101900	PF00646	PF10551	PF00650	0.0179945	0.0191377	0.020267
Glyma.16G079300.1	Glyma.16G079300	PF11976	PF00076	PF00031	0.0386468	0.0517057	0.0984322
Glyma.16G034300.2	Glyma.16G034300	PF12680	PF01575	PF03061	0.0525195	0.113624	0.446506
Glyma.16G216200.11	Glyma.16G216200	PF13847	PF08241	PF01170	0.171177	0.175082	0.196028
Glyma.16G219800.1	Glyma.16G219800	PF00505	PF00249	PF10545	0.0887083	0.10268	0.390284
Glyma.16G017700.3	Glyma.16G017700	PF00170	PF13891	PF00010	0.00019153	0.000430945	0.998652
Glyma.16G017700.1	Glyma.16G017700	PF00170	PF00125	PF00010	0.000155457	0.000206419	0.99889
Glyma.16G017700.2	Glyma.16G017700	PF16987	PF13891	PF00010	0.00274237	0.0176517	0.971283
Glyma.16G101300.1	Glyma.16G101300	PF00383	PF01087	PF06110	0.0624665	0.0763195	0.0858981
Glyma.16G024000.1	Glyma.16G024000	PF00024	PF00026	PF14543	0.000580213	0.152461	0.839943
Glyma.16G183651.1	Glyma.16G183651	PF05617	PF03024	PF00059	0.06602	0.156593	0.589984
Glyma.16G162300.1	Glyma.16G162300	PF00561	PF00326	PF04864	0.0296826	0.0338184	0.823501
Glyma.16G035900.1	Glyma.16G035900	PF02845	PF00141	PF05699	0.0439517	0.0621139	0.128101
Glyma.16G155000.1	Glyma.16G155000	PF01578	PF00909	PF00361	0.0901868	0.214336	0.434338
Glyma.16G194700.2	Glyma.16G194700	PF00190	PF07883	PF03171	0.0354358	0.0564675	0.815308
Glyma.16G194700.1	Glyma.16G194700	PF07977	PF13532	PF03171	0.00288948	0.00405102	0.978006
Glyma.16G196800.1	Glyma.16G196800	PF00361	PF07884	PF00892	0.144377	0.147593	0.14892
Glyma.16G051700.1	Glyma.16G051700	PF05627	PF04774	PF08648	0.0666559	0.120488	0.303988
Glyma.16G080900.1	Glyma.16G080900	PF00288	PF01048	PF01565	0.0627869	0.129422	0.491542
Glyma.16G080900.3	Glyma.16G080900	PF00443	PF01048	PF01565	0.0280728	0.101579	0.378188
Glyma.16G080900.4	Glyma.16G080900	PF01565	PF00288	PF00814	0.12824	0.143541	0.212443
Glyma.16G015800.5	Glyma.16G015800	PF12110	PF14372	PF05699	0.0541627	0.152836	0.353749
Glyma.16G015800.2	Glyma.16G015800	PF12110	PF14372	PF05699	0.0541627	0.152836	0.353749
Glyma.16G015800.6	Glyma.16G015800	PF12110	PF05699	PF00651	0.0948206	0.100416	0.106556
Glyma.16G092700.1	Glyma.16G092700	PF00631	PF00170	PF07716	0.00292948	0.190512	0.804298
Glyma.16G092700.2	Glyma.16G092700	PF00631	PF00170	PF07716	0.00325414	0.190321	0.804013
Glyma.16G168900.1	Glyma.16G168900	PF01593	PF01553	PF08030	0.0320725	0.0360108	0.0592392
Glyma.16G126100.1	Glyma.16G126100	PF00069	PF11721	PF00026	0.164895	0.211475	0.223702
Glyma.16G079200.1	Glyma.16G079200	PF01734	PF07714	PF00069	0.000104552	0.0249543	0.974836
Glyma.16G124000.2	Glyma.16G124000	PF03629	PF13472	PF00657	1.12692e-05	0.0819322	0.918035
Glyma.16G135900.1	Glyma.16G135900	PF00004	PF00857	PF04101	0.105546	0.128623	0.212139
Glyma.16G032100.1	Glyma.16G032100	PF02721	PF10551	PF07731	0.046722	0.057691	0.0671776
Glyma.16G112200.1	Glyma.16G112200	PF14634	PF00097	PF13639	0.0195134	0.170183	0.789963
Glyma.16G089300.2	Glyma.16G089300	PF00814	PF00857	PF01661	0.0377143	0.0402693	0.0627055
Glyma.16G092400.1	Glyma.16G092400	PF05699	PF00631	PF00248	0.0289136	0.0706057	0.0938115
Glyma.16G024700.3	Glyma.16G024700	PF17135	PF00347	PF01423	0.0786992	0.0821261	0.0990451
Glyma.16G024700.1	Glyma.16G024700	PF17135	PF00347	PF01423	0.0786992	0.0821261	0.0990451
Glyma.16G193050.1	Glyma.16G193050	PF07145	PF00171	PF12656	0.0598575	0.0615797	0.0807056
Glyma.16G150000.2	Glyma.16G150000	PF04389	PF13519	PF00092	0.0392191	0.0412614	0.421576
Glyma.16G150000.1	Glyma.16G150000	PF00271	PF00724	PF01336	0.0611354	0.0735296	0.102779
Glyma.16G129700.1	Glyma.16G129700	PF04970	PF13720	PF00252	0.0476459	0.0614797	0.0685419
Glyma.16G042900.1	Glyma.16G042900	PF05641	PF00855	PF12776	0.070181	0.126865	0.326935
Glyma.16G170000.1	Glyma.16G170000	PF00010	PF00234	PF04419	0.0524153	0.0702681	0.112981
Glyma.16G064800.2	Glyma.16G064800	PF01636	PF07714	PF00069	4.4428e-05	0.0256163	0.974289
Glyma.16G064800.3	Glyma.16G064800	PF01636	PF07714	PF00069	1.22813e-05	0.016328	0.983653
Glyma.16G151100.7	Glyma.16G151100	PF00550	PF01398	PF04909	0.0551893	0.198145	0.269335
Glyma.16G151100.6	Glyma.16G151100	PF12697	PF04909	PF00561	0.0890864	0.133516	0.141762
Glyma.16G151100.3	Glyma.16G151100	PF12697	PF04909	PF00561	0.0890864	0.133516	0.141763
Glyma.16G177700.1	Glyma.16G177700	PF08387	PF12937	PF00646	0.103814	0.192003	0.599615
Glyma.16G036700.1	Glyma.16G036700	PF04802	PF07035	PF00651	7.44115e-05	0.00537806	0.994407
Glyma.16G116400.3	Glyma.16G116400	PF08698	PF15477	PF07460	0.07815	0.134528	0.231785
Glyma.16G116600.1	Glyma.16G116600	PF11835	PF04059	PF00076	0.000478282	0.0100795	0.988101
Glyma.16G083350.1	Glyma.16G083350	PF14111	PF00307	PF13456	0.0319249	0.0439318	0.0619005
Glyma.16G044100.1	Glyma.16G044100	PF00135	PF00576	PF07731	0.0373932	0.0468298	0.0946855
Glyma.16G023700.3	Glyma.16G023700	PF12755	PF08389	PF03810	0.0124375	0.0970741	0.879728
Glyma.16G109200.1	Glyma.16G109200	PF12348	PF12719	PF12717	0.00882626	0.00935698	0.955998
Glyma.16G109200.2	Glyma.16G109200	PF12348	PF12719	PF12717	0.00412932	0.0103632	0.964081
Glyma.16G175900.1	Glyma.16G175900	PF03033	PF13579	PF00534	0.124821	0.177529	0.238163
Glyma.16G102400.2	Glyma.16G102400	PF00646	PF12333	PF00650	0.000641043	0.00166925	0.993528
Glyma.16G102400.1	Glyma.16G102400	PF12333	PF00646	PF00650	0.000670811	0.000729682	0.995804
Glyma.16G102400.3	Glyma.16G102400	PF10551	PF05699	PF00650	0.0209328	0.0309645	0.782449
Glyma.16G082100.1	Glyma.16G082100	PF00109	PF00171	PF00112	0.0409011	0.0738042	0.206527
Glyma.16G208100.1	Glyma.16G208100	PF00326	PF00135	PF07859	0.0715375	0.39207	0.529052
Glyma.16G142900.1	Glyma.16G142900	PF00307	PF13966	PF13456	0.0585921	0.0871885	0.0879042
Glyma.16G057500.1	Glyma.16G057500	PF00685	PF04572	PF09258	0.0656523	0.303496	0.39907
Glyma.16G075000.1	Glyma.16G075000	PF07885	PF14703	PF13968	0.0391738	0.0639011	0.119018
Glyma.16G199900.1	Glyma.16G199900	PF10502	PF00190	PF00127	0.151317	0.174819	0.234012
Glyma.16G007600.5	Glyma.16G007600	PF10545	PF00505	PF00249	0.0491591	0.102882	0.295816
Glyma.16G007600.1	Glyma.16G007600	PF10545	PF00505	PF00249	0.0509129	0.0969384	0.303874
Glyma.16G007600.3	Glyma.16G007600	PF10545	PF00505	PF00249	0.0492708	0.0983094	0.298478
Glyma.16G192900.1	Glyma.16G192900	PF00704	PF00128	PF00069	0.0808944	0.129536	0.475603
Glyma.16G076500.1	Glyma.16G076500	PF12348	PF08492	PF12717	0.0172386	0.0203401	0.921137
Glyma.16G076500.2	Glyma.16G076500	PF12348	PF08492	PF12717	0.0172386	0.0203401	0.921137
Glyma.16G208700.1	Glyma.16G208700	PF00224	PF03460	PF00817	0.0869722	0.0921444	0.12355
Glyma.16G208700.2	Glyma.16G208700	PF00224	PF03460	PF00817	0.0869722	0.0921444	0.12355
Glyma.16G031100.7	Glyma.16G031100	PF00188	PF12776	PF00059	0.0291012	0.161271	0.195974
Glyma.16G031100.8	Glyma.16G031100	PF00188	PF00665	PF12776	0.0552041	0.0757139	0.169835
Glyma.16G031100.1	Glyma.16G031100	PF08719	PF00182	PF05419	0.0651294	0.0918426	0.120615
Glyma.16G031100.9	Glyma.16G031100	PF00171	PF00182	PF00665	0.0640932	0.123157	0.137625
Glyma.16G031100.10	Glyma.16G031100	PF00182	PF00188	PF00059	0.0879711	0.168879	0.193775
Glyma.16G031100.11	Glyma.16G031100	PF12766	PF00171	PF00188	0.0547205	0.161116	0.388743
Glyma.16G071100.1	Glyma.16G071100	PF01852	PF09588	PF00102	0.101752	0.103156	0.133389
Glyma.16G213200.1	Glyma.16G213200	PF00107	PF05362	PF03143	0.100061	0.156809	0.200956
Glyma.16G187800.1	Glyma.16G187800	PF00141	PF02469	PF11721	0.0284178	0.0382512	0.613112
Glyma.16G025500.1	Glyma.16G025500	PF00505	PF16987	PF00447	0.0628674	0.262276	0.263314
Glyma.16G025500.5	Glyma.16G025500	PF10241	PF00447	PF16987	0.108415	0.216795	0.277232
Glyma.16G020800.1	Glyma.16G020800	PF01556	PF00168	PF00011	0.0602838	0.0969722	0.143157
Glyma.16G012300.1	Glyma.16G012300	PF01348	PF00271	PF01541	0.060677	0.0741148	0.194085
Glyma.16G012300.2	Glyma.16G012300	PF01348	PF00271	PF01541	0.0755229	0.0855197	0.206678
Glyma.16G012300.3	Glyma.16G012300	PF01844	PF01541	PF00443	0.0654397	0.123041	0.136411
Glyma.16G059300.1	Glyma.16G059300	PF09811	PF11976	PF13499	0.0384541	0.0487512	0.26596
Glyma.16G019100.1	Glyma.16G019100	PF00011	PF00635	PF17766	0.121749	0.130839	0.241821
Glyma.16G107400.1	Glyma.16G107400	PF00689	PF13962	PF02453	0.0470171	0.13857	0.149827
Glyma.16G184200.2	Glyma.16G184200	PF00704	PF00754	PF00069	0.0752472	0.109907	0.286718
Glyma.16G184200.1	Glyma.16G184200	PF07714	PF00754	PF00069	0.0802516	0.0911491	0.363351
Glyma.16G191201.1	Glyma.16G191201	PF14547	PF14368	PF00234	0.0379363	0.230185	0.730733
Glyma.16G013800.1	Glyma.16G013800	PF06886	PF14303	PF03763	0.00482882	0.0127601	0.972503
Glyma.16G056100.1	Glyma.16G056100	PF09258	PF04572	PF04669	0.00866254	0.0987378	0.839867
Glyma.16G103000.1	Glyma.16G103000	PF00361	PF00892	PF03151	0.0596101	0.320833	0.32423
Glyma.16G139000.2	Glyma.16G139000	PF01699	PF06813	PF01061	0.0914982	0.197338	0.305007
Glyma.16G052800.1	Glyma.16G052800	PF03190	PF00085	PF00462	0.000215917	0.0139863	0.984893
Glyma.16G043800.1	Glyma.16G043800	PF00361	PF00892	PF02683	0.118548	0.155258	0.203157
Glyma.16G011800.1	Glyma.16G011800	PF04266	PF00651	PF00169	0.0141836	0.0225104	0.871387
Glyma.16G149700.1	Glyma.16G149700	PF02140	PF01778	PF13891	0.0220352	0.0306724	0.898046
Glyma.16G035000.1	Glyma.16G035000	PF03987	PF12047	PF10419	0.0636681	0.116276	0.171791
Glyma.16G099100.2	Glyma.16G099100	PF12937	PF00646	PF12333	0.00745745	0.0110697	0.951993
Glyma.16G046700.1	Glyma.16G046700	PF10382	PF14111	PF02362	9.97339e-05	0.000103184	0.999403
Glyma.16G046700.3	Glyma.16G046700	PF14111	PF18036	PF02362	8.07885e-05	8.36671e-05	0.999423
Glyma.16G046700.2	Glyma.16G046700	PF00168	PF14111	PF02362	8.00047e-05	9.97497e-05	0.99935
Glyma.16G062500.1	Glyma.16G062500	PF01699	PF13906	PF00916	0.101766	0.108036	0.156542
Glyma.16G062500.5	Glyma.16G062500	PF00689	PF01699	PF00916	0.0767625	0.137295	0.18596
Glyma.16G062500.6	Glyma.16G062500	PF00689	PF01699	PF00916	0.0767623	0.137295	0.185961
Glyma.16G044400.1	Glyma.16G044400	PF12755	PF03810	PF08389	0.0371263	0.258576	0.600639
Glyma.16G038800.1	Glyma.16G038800	PF00707	PF01172	PF00076	0.00446484	0.00598547	0.976566
Glyma.16G038800.2	Glyma.16G038800	PF00707	PF01172	PF00076	0.00329168	0.0107842	0.969489
Glyma.16G181600.1	Glyma.16G181600	PF01578	PF01061	PF07298	0.124988	0.178344	0.187745
Glyma.16G058700.1	Glyma.16G058700	PF17781	PF14432	PF17177	0.00074197	0.0225382	0.972406
Glyma.16G030300.1	Glyma.16G030300	PF14111	PF03364	PF00293	0.0186786	0.0204403	0.874726
Glyma.16G222400.1	Glyma.16G222400	PF05699	PF00168	PF00505	0.0172393	0.0174399	0.0190874
Glyma.16G080700.1	Glyma.16G080700	PF00644	PF00622	PF04755	0.0592227	0.113968	0.13144
Glyma.16G080700.3	Glyma.16G080700	PF04755	PF00644	PF00622	0.08983	0.11142	0.181195
Glyma.16G209800.1	Glyma.16G209800	PF00128	PF00150	PF17801	0.000198775	0.00104522	0.998266
Glyma.16G166200.3	Glyma.16G166200	PF00141	PF08387	PF00646	0.0303279	0.0352949	0.0821457
Glyma.16G166200.2	Glyma.16G166200	PF00646	PF13456	PF05699	0.0358365	0.0426496	0.0463914
Glyma.16G130200.1	Glyma.16G130200	PF00249	PF10545	PF12776	0.0680206	0.119036	0.596742
Glyma.16G053950.1	Glyma.16G053950	PF00024	PF05617	PF00141	0.0555724	0.0762041	0.0782193
Glyma.16G148900.1	Glyma.16G148900	PF14547	PF14368	PF00234	0.00286392	0.329803	0.665675
Glyma.16G100100.1	Glyma.16G100100	PF14547	PF14368	PF00234	0.0622437	0.273567	0.661838
Glyma.16G036151.1	Glyma.16G036151	PF13456	PF00646	PF00501	0.0356474	0.0359423	0.0645384
Glyma.16G203200.1	Glyma.16G203200	PF00582	PF00916	PF00999	0.00158178	0.00459465	0.990487
Glyma.16G172900.1	Glyma.16G172900	PF08387	PF02201	PF00646	0.0414511	0.06818	0.146353
Glyma.16G190101.1	Glyma.16G190101	PF00102	PF05199	PF00011	0.0476429	0.0476968	0.0818913
Glyma.16G149300.2	Glyma.16G149300	PF00085	PF01553	PF03190	0.129843	0.182925	0.188082
Glyma.16G119500.1	Glyma.16G119500	PF11698	PF12333	PF02854	0.0426281	0.0679842	0.196628
Glyma.16G053400.1	Glyma.16G053400	PF00294	PF01048	PF00483	0.0383172	0.0393539	0.0848787
Glyma.16G070101.1	Glyma.16G070101	PF00635	PF02221	PF16205	0.0565012	0.0728785	0.683135
Glyma.16G010700.1	Glyma.16G010700	PF05678	PF00089	PF13259	0.144416	0.146977	0.286822
Glyma.16G060500.1	Glyma.16G060500	PF08314	PF03810	PF12612	0.0770666	0.11051	0.14529
Glyma.16G060500.2	Glyma.16G060500	PF12612	PF09759	PF08314	0.0898722	0.103892	0.112688
Glyma.16G187200.1	Glyma.16G187200	PF12937	PF00646	PF00168	0.0652635	0.171951	0.228583
Glyma.16G187200.2	Glyma.16G187200	PF12937	PF00646	PF00168	0.0652635	0.171951	0.228583
Glyma.16G133933.1	Glyma.16G133933	PF00141	PF00501	PF00156	0.0389837	0.0412368	0.0792613
Glyma.16G036000.1	Glyma.16G036000	PF06813	PF02225	PF01699	0.000601564	0.00112415	0.996692
Glyma.16G081200.1	Glyma.16G081200	PF00199	PF00246	PF00884	0.0138432	0.024369	0.899922
Glyma.16G081200.4	Glyma.16G081200	PF00246	PF03171	PF00884	0.0611693	0.0612515	0.514776
Glyma.16G048600.1	Glyma.16G048600	PF01167	PF12656	PF02229	0.0378113	0.0533911	0.144833
Glyma.16G151200.2	Glyma.16G151200	PF09177	PF05008	PF10496	0.0988052	0.1025	0.760293
Glyma.16G151200.1	Glyma.16G151200	PF09177	PF05008	PF10496	0.0988052	0.1025	0.760293
Glyma.16G086900.2	Glyma.16G086900	PF00564	PF01172	PF10382	0.0656496	0.0731061	0.105435
Glyma.16G038300.4	Glyma.16G038300	PF00248	PF04909	PF01717	2.95431e-05	3.31179e-05	0.999923
Glyma.16G038300.5	Glyma.16G038300	PF00248	PF04909	PF01717	1.05098e-05	1.86696e-05	0.999962
Glyma.16G038300.10	Glyma.16G038300	PF04909	PF00248	PF01717	1.35749e-05	2.53872e-05	0.999951
Glyma.16G038300.9	Glyma.16G038300	PF04909	PF00248	PF01717	1.35749e-05	2.53872e-05	0.999951
Glyma.16G038300.6	Glyma.16G038300	PF04909	PF00248	PF01717	1.35749e-05	2.53872e-05	0.999951
Glyma.16G038300.8	Glyma.16G038300	PF04909	PF00248	PF01717	1.35749e-05	2.53872e-05	0.999951
Glyma.16G038300.3	Glyma.16G038300	PF04909	PF00248	PF01717	1.35749e-05	2.53872e-05	0.999951
Glyma.16G038300.7	Glyma.16G038300	PF04909	PF00248	PF01717	1.35749e-05	2.53872e-05	0.999951
Glyma.16G038300.1	Glyma.16G038300	PF04909	PF00248	PF01717	7.96361e-06	5.53252e-05	0.999914
Glyma.16G038300.2	Glyma.16G038300	PF00150	PF08323	PF01717	0.0127482	0.0167752	0.806143
Glyma.16G038300.11	Glyma.16G038300	PF00150	PF04909	PF01717	0.0054448	0.00732504	0.894045
Glyma.16G038300.12	Glyma.16G038300	PF01261	PF04909	PF01717	0.0235544	0.0277539	0.737858
Glyma.16G161350.1	Glyma.16G161350	PF03031	PF12937	PF00646	0.0256426	0.217412	0.654476
Glyma.16G182866.1	Glyma.16G182866	PF09759	PF08389	PF01273	0.0399223	0.129004	0.159158
Glyma.16G181700.2	Glyma.16G181700	PF00443	PF00855	PF12047	0.0665203	0.0902368	0.118908
Glyma.16G085700.1	Glyma.16G085700	PF13401	PF00004	PF00931	0.0263523	0.0638942	0.826837
Glyma.16G085700.3	Glyma.16G085700	PF13401	PF00004	PF00931	0.0135957	0.0398141	0.843467
Glyma.16G085700.4	Glyma.16G085700	PF00107	PF00481	PF00931	0.0375592	0.0387133	0.57677
Glyma.16G085700.5	Glyma.16G085700	PF00646	PF00004	PF00931	0.00325911	0.00456573	0.976569
Glyma.16G136600.3	Glyma.16G136600	PF17874	PF00004	PF00931	0.0154162	0.0335714	0.91719
Glyma.16G020200.1	Glyma.16G020200	PF01636	PF07714	PF00069	2.51574e-06	0.00874047	0.991256
Glyma.16G045700.1	Glyma.16G045700	PF00134	PF00155	PF07522	0.000157049	0.000229222	0.998605
Glyma.16G045700.2	Glyma.16G045700	PF00102	PF00134	PF07522	0.000202536	0.000460188	0.9976
Glyma.16G131700.1	Glyma.16G131700	PF00004	PF00076	PF00171	4.89469e-06	7.27821e-06	0.999948
Glyma.16G188725.1	Glyma.16G188725	PF12937	PF00646	PF01273	0.0355622	0.126015	0.169596
Glyma.16G131750.1	Glyma.16G131750	PF01061	PF05529	PF07885	0.0736729	0.105633	0.112532
Glyma.16G173000.1	Glyma.16G173000	PF00657	PF00150	PF00704	0.000809443	0.00226536	0.99556
Glyma.16G160600.1	Glyma.16G160600	PF00326	PF01764	PF04864	0.0115186	0.0366146	0.889613
Glyma.16G001600.1	Glyma.16G001600	PF08212	PF01105	PF04669	0.00712936	0.0104202	0.90383
Glyma.16G001300.3	Glyma.16G001300	PF00892	PF08627	PF06454	0.0778669	0.100979	0.452762
Glyma.16G001300.5	Glyma.16G001300	PF00892	PF08627	PF06454	0.0778669	0.100979	0.452762
Glyma.16G001300.4	Glyma.16G001300	PF00892	PF08627	PF06454	0.0778669	0.100979	0.452762
Glyma.16G012000.1	Glyma.16G012000	PF01243	PF00582	PF00011	1.53767e-05	2.27357e-05	0.9999
Glyma.16G122400.1	Glyma.16G122400	PF01844	PF04997	PF04641	0.0816024	0.148692	0.205021
Glyma.16G167600.1	Glyma.16G167600	PF12776	PF00249	PF10545	0.0120863	0.0477262	0.915394
Glyma.16G149600.1	Glyma.16G149600	PF05678	PF00505	PF10545	0.0603023	0.107113	0.123386
Glyma.16G199500.1	Glyma.16G199500	PF14693	PF02602	PF03364	0.0719364	0.113499	0.189652
Glyma.16G020900.1	Glyma.16G020900	PF05699	PF00069	PF10536	0.0581202	0.0613115	0.0665993
Glyma.16G020900.3	Glyma.16G020900	PF00685	PF05699	PF02902	0.0350837	0.0528055	0.076607
Glyma.16G197300.1	Glyma.16G197300	PF00027	PF10551	PF04970	0.0335137	0.038523	0.0745481
Glyma.16G113700.2	Glyma.16G113700	PF13472	PF01915	PF00657	0.089098	0.0987497	0.230571
Glyma.16G040000.1	Glyma.16G040000	PF12776	PF10545	PF00249	0.137438	0.173249	0.177892
Glyma.16G174200.2	Glyma.16G174200	PF08542	PF00931	PF00004	0.0737406	0.153473	0.331644
Glyma.16G040100.1	Glyma.16G040100	PF03446	PF01565	PF00091	0.00105076	0.00537322	0.990392
Glyma.16G120500.1	Glyma.16G120500	PF00112	PF01541	PF01844	0.0368253	0.0526975	0.207228
Glyma.16G120500.2	Glyma.16G120500	PF00112	PF01541	PF01844	0.0368253	0.0526975	0.207228
Glyma.16G131300.1	Glyma.16G131300	PF03007	PF00249	PF02902	0.041846	0.0506742	0.0666728
Glyma.16G155600.1	Glyma.16G155600	PF00383	PF08378	PF00293	7.11864e-05	0.00022445	0.999409
Glyma.16G155600.3	Glyma.16G155600	PF00651	PF08378	PF00293	6.69092e-05	0.000102976	0.999681
Glyma.16G086401.1	Glyma.16G086401	PF01423	PF00651	PF13456	0.0416417	0.0454517	0.0903699
Glyma.16G083700.1	Glyma.16G083700	PF02836	PF00150	PF01301	0.0022484	0.0434352	0.952241
Glyma.16G193466.1	Glyma.16G193466	PF00646	PF00168	PF01273	0.0534486	0.0699682	0.388571
Glyma.16G065200.5	Glyma.16G065200	PF00026	PF07714	PF00069	0.00149597	0.0323078	0.959812
Glyma.16G065200.1	Glyma.16G065200	PF00026	PF07714	PF00069	0.00149597	0.0323078	0.959812
Glyma.16G132400.1	Glyma.16G132400	PF05678	PF02201	PF13881	0.06695	0.0752155	0.0992718
Glyma.16G176600.2	Glyma.16G176600	PF00651	PF00646	PF00931	0.100402	0.121686	0.316725
Glyma.16G041100.1	Glyma.16G041100	PF02298	PF01105	PF00059	0.0834138	0.0925959	0.212557
Glyma.16G178800.1	Glyma.16G178800	PF02541	PF13426	PF02518	0.00434104	0.0167902	0.963163
Glyma.16G164300.1	Glyma.16G164300	PF03372	PF02469	PF00141	4.32603e-05	0.000164058	0.99949
Glyma.16G123400.4	Glyma.16G123400	PF01423	PF00307	PF14111	0.181392	0.191068	0.199048
Glyma.16G211600.2	Glyma.16G211600	PF10545	PF08790	PF02892	0.0565855	0.182506	0.542077
Glyma.16G215100.1	Glyma.16G215100	PF08423	PF00004	PF00931	0.0520755	0.254449	0.581717
Glyma.16G054300.1	Glyma.16G054300	PF00168	PF00443	PF00035	0.0265332	0.0755444	0.365916
Glyma.16G163500.4	Glyma.16G163500	PF08627	PF00892	PF03151	0.00632385	0.0290324	0.962929
Glyma.16G163500.5	Glyma.16G163500	PF08627	PF00892	PF03151	0.00632385	0.0290324	0.962929
Glyma.16G099151.1	Glyma.16G099151	PF00361	PF01699	PF00999	0.0580358	0.0642696	0.0781603
Glyma.16G048300.1	Glyma.16G048300	PF00307	PF00168	PF14244	0.0848316	0.113857	0.17235
Glyma.16G159500.1	Glyma.16G159500	PF00646	PF17874	PF00931	0.00511862	0.00802664	0.976008
Glyma.16G208000.1	Glyma.16G208000	PF09325	PF09763	PF04782	0.10527	0.185768	0.188189
Glyma.16G197200.1	Glyma.16G197200	PF08241	PF05686	PF03016	0.0824268	0.147683	0.496351
Glyma.16G093500.1	Glyma.16G093500	PF00134	PF07727	PF05699	0.0367848	0.0526849	0.0851352
Glyma.16G099200.1	Glyma.16G099200	PF02698	PF13472	PF00657	0.00180564	0.277529	0.71426
Glyma.16G131900.1	Glyma.16G131900	PF00498	PF10551	PF17942	0.000370998	0.0010299	0.994532
Glyma.16G023900.1	Glyma.16G023900	PF00170	PF14215	PF00010	0.0518611	0.13599	0.731027
Glyma.16G192732.1	Glyma.16G192732	PF01172	PF02037	PF12656	0.0292661	0.093956	0.14158
Glyma.16G192732.2	Glyma.16G192732	PF01172	PF02037	PF12656	0.0292661	0.093956	0.14158
Glyma.16G124350.1	Glyma.16G124350	PF00685	PF07714	PF00069	0.0241163	0.0550797	0.086319
Glyma.16G045200.1	Glyma.16G045200	PF17035	PF08159	PF02179	0.0845438	0.106838	0.154094
Glyma.16G185601.1	Glyma.16G185601	PF02469	PF00026	PF00144	0.101406	0.118454	0.139381
Glyma.16G180000.1	Glyma.16G180000	PF00909	PF00999	PF00361	0.111181	0.163592	0.391431
Glyma.16G169200.1	Glyma.16G169200	PF01273	PF11721	PF02469	0.0867031	0.0904132	0.193348
Glyma.16G017900.2	Glyma.16G017900	PF05140	PF13180	PF03168	0.000374846	0.00187305	0.995991
Glyma.16G017900.1	Glyma.16G017900	PF10502	PF13180	PF03168	0.000445194	0.000719139	0.996014
Glyma.16G222000.3	Glyma.16G222000	PF11955	PF04675	PF01348	0.00430769	0.0047722	0.958516
Glyma.16G118800.1	Glyma.16G118800	PF03061	PF00330	PF00501	0.0529836	0.0636073	0.0804402
Glyma.16G118800.3	Glyma.16G118800	PF00330	PF00501	PF02803	0.0520839	0.0804219	0.143169
Glyma.16G219400.1	Glyma.16G219400	PF10469	PF01180	PF00248	7.08312e-07	8.58045e-07	0.999996
Glyma.16G219400.2	Glyma.16G219400	PF01180	PF01261	PF00248	8.51127e-05	0.000613273	0.999001
Glyma.16G047400.1	Glyma.16G047400	PF01743	PF13023	PF08766	0.0369674	0.0509642	0.118375
Glyma.16G072400.1	Glyma.16G072400	PF03358	PF00085	PF00462	0.000472297	0.00511873	0.992124
Glyma.16G077500.1	Glyma.16G077500	PF16561	PF08172	PF12325	0.0165994	0.104129	0.796793
Glyma.16G168200.1	Glyma.16G168200	PF01645	PF02683	PF13386	0.0353225	0.212418	0.446563
Glyma.16G220400.2	Glyma.16G220400	PF00251	PF00133	PF17801	0.0332856	0.155619	0.363239
Glyma.16G008100.3	Glyma.16G008100	PF07802	PF02320	PF06747	0.00552676	0.015913	0.963285
Glyma.16G051200.1	Glyma.16G051200	PF05057	PF12697	PF00561	0.0121851	0.195837	0.76093
Glyma.16G162400.1	Glyma.16G162400	PF00326	PF00561	PF04864	0.0555159	0.0612669	0.694897
Glyma.16G037500.6	Glyma.16G037500	PF00089	PF07714	PF00069	5.2206e-05	0.0520658	0.947785
Glyma.16G037500.9	Glyma.16G037500	PF00089	PF07714	PF00069	5.2206e-05	0.0520658	0.947785
Glyma.16G037500.1	Glyma.16G037500	PF00089	PF07714	PF00069	5.2206e-05	0.0520658	0.947785
Glyma.16G037500.10	Glyma.16G037500	PF00089	PF07714	PF00069	5.2206e-05	0.0520658	0.947785
Glyma.16G037500.7	Glyma.16G037500	PF00089	PF07714	PF00069	5.2206e-05	0.0520658	0.947785
Glyma.16G037500.8	Glyma.16G037500	PF00089	PF07714	PF00069	5.2206e-05	0.0520658	0.947785
Glyma.16G037500.3	Glyma.16G037500	PF00089	PF07714	PF00069	5.2206e-05	0.0520658	0.947785
Glyma.16G148600.2	Glyma.16G148600	PF00169	PF14226	PF00293	0.000335879	0.0014123	0.996233
Glyma.16G167500.1	Glyma.16G167500	PF00249	PF00505	PF10545	0.0185141	0.0186777	0.935431
Glyma.16G190800.2	Glyma.16G190800	PF00026	PF04424	PF14215	0.0497673	0.087077	0.185811
Glyma.16G020750.1	Glyma.16G020750	PF08718	PF05699	PF00134	0.05768	0.0786477	0.103377
Glyma.16G020750.2	Glyma.16G020750	PF08718	PF05699	PF00134	0.05768	0.0786477	0.103377
Glyma.16G110400.1	Glyma.16G110400	PF00754	PF01823	PF10699	0.0160534	0.0171019	0.766608
Glyma.16G162800.1	Glyma.16G162800	PF17781	PF14432	PF17177	0.0186163	0.0203451	0.938437
Glyma.16G036100.4	Glyma.16G036100	PF02738	PF01138	PF00330	0.0798826	0.0899099	0.102142
Glyma.16G050400.1	Glyma.16G050400	PF04774	PF05678	PF08648	0.0765775	0.107179	0.125182
Glyma.16G068300.2	Glyma.16G068300	PF03118	PF04182	PF00307	0.0323211	0.0380912	0.070053
Glyma.16G017000.1	Glyma.16G017000	PF00188	PF01105	PF00141	0.0223091	0.0289172	0.0653347
Glyma.16G206900.1	Glyma.16G206900	PF12717	PF07651	PF00248	0.0893692	0.260906	0.297156
Glyma.16G052300.1	Glyma.16G052300	PF02453	PF08510	PF06454	0.0798195	0.135961	0.144616
Glyma.16G052300.4	Glyma.16G052300	PF01485	PF00097	PF13639	0.0544528	0.146115	0.207679
Glyma.16G196700.1	Glyma.16G196700	PF01852	PF00089	PF00046	0.0564287	0.0888589	0.695749
Glyma.16G196700.5	Glyma.16G196700	PF01852	PF00089	PF00046	0.0249424	0.0639046	0.811801
Glyma.16G196700.3	Glyma.16G196700	PF00089	PF05920	PF00046	0.017485	0.0562181	0.801752
Glyma.16G196700.8	Glyma.16G196700	PF00089	PF05920	PF00046	0.017485	0.0562181	0.801752
Glyma.16G196700.2	Glyma.16G196700	PF00089	PF05920	PF00046	0.017485	0.0562181	0.801752
Glyma.16G196700.7	Glyma.16G196700	PF00089	PF05920	PF00046	0.017485	0.0562181	0.801752
Glyma.16G196700.6	Glyma.16G196700	PF00089	PF05920	PF00046	0.017485	0.0562181	0.801752
Glyma.16G107700.1	Glyma.16G107700	PF14634	PF00097	PF13639	0.0193216	0.262397	0.705503
Glyma.16G107700.4	Glyma.16G107700	PF04824	PF00615	PF15511	0.0590047	0.060892	0.0944584
Glyma.16G107700.5	Glyma.16G107700	PF13919	PF07145	PF05678	0.0360474	0.0611218	0.204069
Glyma.16G014300.1	Glyma.16G014300	PF01105	PF00188	PF04043	0.0557136	0.0579951	0.247248
Glyma.16G025900.1	Glyma.16G025900	PF01398	PF00407	PF03987	0.0807267	0.116713	0.139467
Glyma.16G025900.2	Glyma.16G025900	PF03876	PF01928	PF00407	0.00985611	0.0107632	0.896953
Glyma.16G201400.1	Glyma.16G201400	PF00125	PF14379	PF00010	0.00021442	0.000350343	0.999018
Glyma.16G052900.1	Glyma.16G052900	PF05199	PF00011	PF13881	0.000376335	0.000400284	0.997465
Glyma.16G103800.1	Glyma.16G103800	PF12680	PF14111	PF00407	0.0306153	0.0714603	0.221634
Glyma.16G177800.1	Glyma.16G177800	PF09835	PF14159	PF06916	0.0921834	0.180709	0.416629
Glyma.16G010400.3	Glyma.16G010400	PF00439	PF00168	PF00169	0.0903419	0.127714	0.245065
Glyma.16G214641.1	Glyma.16G214641	PF00646	PF05699	PF08387	0.0688194	0.0695035	0.110501
Glyma.16G214641.2	Glyma.16G214641	PF13456	PF13966	PF05699	0.0572697	0.0702514	0.127819
Glyma.16G216400.1	Glyma.16G216400	PF03108	PF03101	PF00098	0.132856	0.14298	0.26392
Glyma.16G017600.1	Glyma.16G017600	PF02453	PF06803	PF14159	5.88424e-05	7.79584e-05	0.999824
Glyma.16G168000.1	Glyma.16G168000	PF00291	PF00107	PF00501	0.0594223	0.27049	0.304491
Glyma.16G168000.2	Glyma.16G168000	PF00291	PF00107	PF00501	0.0594223	0.27049	0.304491
Glyma.16G133800.1	Glyma.16G133800	PF07766	PF02889	PF00027	0.0397076	0.0401224	0.0404051
Glyma.16G029600.1	Glyma.16G029600	PF02214	PF07707	PF00651	0.000143828	0.00155661	0.997888
Glyma.16G150100.1	Glyma.16G150100	PF00249	PF00505	PF10545	0.0431244	0.287877	0.613449
Glyma.16G114900.1	Glyma.16G114900	PF00916	PF00999	PF01699	0.124895	0.195828	0.322575
Glyma.16G219200.10	Glyma.16G219200	PF05699	PF07842	PF12110	0.0776781	0.0860959	0.183689
Glyma.16G219200.1	Glyma.16G219200	PF07842	PF05699	PF12110	0.0877754	0.0920305	0.205051
Glyma.16G056400.2	Glyma.16G056400	PF00689	PF16212	PF03151	0.0489243	0.0537123	0.0752162
Glyma.16G056400.3	Glyma.16G056400	PF00689	PF16212	PF03151	0.0489243	0.0537123	0.0752162
Glyma.16G056400.4	Glyma.16G056400	PF00089	PF02140	PF00168	0.0339719	0.0387883	0.0519698
Glyma.16G056400.1	Glyma.16G056400	PF00060	PF13180	PF09430	0.0406392	0.0537294	0.0952123
Glyma.16G056400.5	Glyma.16G056400	PF00535	PF00089	PF00168	0.0257073	0.0322289	0.0483433
Glyma.16G056400.6	Glyma.16G056400	PF14543	PF00026	PF10699	0.0437394	0.0452331	0.0675814
Glyma.16G056400.7	Glyma.16G056400	PF00689	PF13180	PF00168	0.0333467	0.04932	0.0677189
Glyma.16G056400.8	Glyma.16G056400	PF01764	PF01734	PF00168	0.0245574	0.0270568	0.0415668
Glyma.16G056400.9	Glyma.16G056400	PF01423	PF01764	PF01734	0.0326116	0.0345146	0.0541913
Glyma.16G185500.1	Glyma.16G185500	PF07714	PF02469	PF00069	0.0579161	0.0616035	0.298864
Glyma.16G177600.1	Glyma.16G177600	PF01734	PF00089	PF00010	0.0444209	0.0637412	0.0701857
Glyma.16G206700.1	Glyma.16G206700	PF00856	PF00059	PF06839	0.0448344	0.188183	0.253024
Glyma.16G193000.3	Glyma.16G193000	PF00141	PF00704	PF00069	0.0522309	0.0665144	0.179745
Glyma.16G167900.1	Glyma.16G167900	PF01336	PF11976	PF01423	0.000811581	0.00149105	0.996066
Glyma.16G043700.1	Glyma.16G043700	PF00657	PF00704	PF04043	0.118691	0.164394	0.174909
Glyma.16G005200.1	Glyma.16G005200	PF04043	PF08392	PF00082	0.0433402	0.0668906	0.142055
Glyma.16G220600.1	Glyma.16G220600	PF09816	PF10650	PF14383	0.0466775	0.109547	0.14482
Glyma.16G059100.1	Glyma.16G059100	PF00582	PF00042	PF00085	0.0729184	0.114286	0.193849
Glyma.16G141000.1	Glyma.16G141000	PF00909	PF06813	PF01699	0.0521949	0.067653	0.76604
Glyma.16G141000.2	Glyma.16G141000	PF00909	PF06813	PF01699	0.151223	0.2231	0.317616
Glyma.16G039400.2	Glyma.16G039400	PF00884	PF00933	PF01915	1.45639e-05	0.000275203	0.999657
Glyma.16G039400.1	Glyma.16G039400	PF00082	PF00933	PF01915	3.04785e-05	0.00108571	0.998844
Glyma.16G025200.1	Glyma.16G025200	PF13439	PF13579	PF00534	0.0378895	0.0535402	0.881123
Glyma.16G025200.2	Glyma.16G025200	PF04864	PF04572	PF00685	0.0368967	0.0524092	0.715532
Glyma.16G034100.1	Glyma.16G034100	PF12678	PF00097	PF13639	0.00899946	0.144484	0.827756
Glyma.16G181900.1	Glyma.16G181900	PF13086	PF07728	PF00004	0.0770212	0.088447	0.524363
Glyma.16G028500.1	Glyma.16G028500	PF04280	PF02941	PF03364	0.06949	0.0759885	0.126023
Glyma.16G210966.1	Glyma.16G210966	PF00891	PF03936	PF00069	0.0419341	0.0509931	0.109759
Glyma.16G061900.2	Glyma.16G061900	PF05703	PF00141	PF04043	0.040432	0.0478729	0.433797
Glyma.16G053133.1	Glyma.16G053133	PF05529	PF01105	PF07885	0.0312897	0.0441005	0.0674425
Glyma.16G191732.1	Glyma.16G191732	PF00059	PF04043	PF00443	0.038754	0.0795431	0.0891205
Glyma.16G181500.1	Glyma.16G181500	PF02854	PF01417	PF01466	0.00753363	0.0103265	0.949106
Glyma.16G181500.6	Glyma.16G181500	PF02854	PF01417	PF01466	0.00753363	0.0103265	0.949106
Glyma.16G181500.3	Glyma.16G181500	PF02854	PF01417	PF01466	0.00753363	0.0103265	0.949106
Glyma.16G181500.39	Glyma.16G181500	PF15612	PF01088	PF01466	0.00307378	0.00689952	0.967108
Glyma.16G181500.9	Glyma.16G181500	PF01088	PF01417	PF01466	0.00158838	0.00218697	0.987611
Glyma.16G181500.10	Glyma.16G181500	PF01088	PF01417	PF01466	0.00158838	0.00218697	0.987611
Glyma.16G181500.15	Glyma.16G181500	PF15612	PF01088	PF01466	0.00399697	0.00651316	0.976005
Glyma.16G181500.16	Glyma.16G181500	PF15612	PF01088	PF01466	0.00399697	0.00651316	0.976005
Glyma.16G181500.2	Glyma.16G181500	PF01088	PF01417	PF01466	0.00158838	0.00218697	0.987611
Glyma.16G181500.19	Glyma.16G181500	PF15612	PF01088	PF01466	0.00399698	0.00651318	0.976005
Glyma.16G181500.18	Glyma.16G181500	PF15612	PF01088	PF01466	0.00399698	0.00651318	0.976005
Glyma.16G181500.23	Glyma.16G181500	PF15612	PF01088	PF01466	0.00387408	0.0070029	0.981615
Glyma.16G181500.20	Glyma.16G181500	PF15612	PF01088	PF01466	0.00387408	0.0070029	0.981615
Glyma.16G181500.4	Glyma.16G181500	PF15612	PF01088	PF01466	0.00387408	0.0070029	0.981615
Glyma.16G181500.12	Glyma.16G181500	PF15612	PF01088	PF01466	0.00387408	0.0070029	0.981615
Glyma.16G181500.11	Glyma.16G181500	PF15612	PF01088	PF01466	0.00387408	0.0070029	0.981615
Glyma.16G016500.1	Glyma.16G016500	PF05699	PF12171	PF02892	0.086569	0.102784	0.233339
Glyma.16G147200.1	Glyma.16G147200	PF07716	PF00170	PF00010	0.000284175	0.00103252	0.998379
Glyma.16G014200.1	Glyma.16G014200	PF09763	PF04048	PF06148	0.0915268	0.240131	0.577393
Glyma.16G014200.2	Glyma.16G014200	PF04048	PF09763	PF06148	0.0470458	0.126011	0.749414
Glyma.16G138400.1	Glyma.16G138400	PF00505	PF10545	PF00249	0.0513003	0.0625681	0.855572
Glyma.16G114500.2	Glyma.16G114500	PF04194	PF00581	PF03987	0.0656719	0.0801545	0.122605
Glyma.16G114500.3	Glyma.16G114500	PF00581	PF00856	PF04194	0.0832001	0.119781	0.12328
Glyma.16G114500.4	Glyma.16G114500	PF06839	PF13639	PF00097	0.037841	0.0382219	0.0814477
Glyma.16G114500.5	Glyma.16G114500	PF00004	PF13639	PF00097	0.0645994	0.0727543	0.184206
Glyma.16G175600.1	Glyma.16G175600	PF00288	PF13579	PF01138	0.115182	0.116778	0.144639
Glyma.16G148500.1	Glyma.16G148500	PF00098	PF00097	PF06943	0.0314408	0.0435721	0.540241
Glyma.16G097600.2	Glyma.16G097600	PF08806	PF01844	PF00293	0.0370539	0.0755956	0.140822
Glyma.16G097600.1	Glyma.16G097600	PF08806	PF01844	PF00293	0.0370539	0.0755956	0.140822
Glyma.16G122000.1	Glyma.16G122000	PF02892	PF12796	PF18137	0.05891	0.0678891	0.0724806
Glyma.16G019400.1	Glyma.16G019400	PF12776	PF00855	PF05641	0.0637028	0.0665815	0.254063
Glyma.16G063000.1	Glyma.16G063000	PF09329	PF09368	PF06911	0.112849	0.190774	0.35643
Glyma.16G141900.1	Glyma.16G141900	PF00685	PF05047	PF05699	0.0266315	0.0300903	0.0573929
Glyma.16G012700.1	Glyma.16G012700	PF12708	PF01915	PF00082	4.4185e-05	0.000182807	0.999373
Glyma.16G064100.1	Glyma.16G064100	PF01636	PF07714	PF00069	0.000172085	0.0335015	0.966243
Glyma.16G012100.4	Glyma.16G012100	PF04802	PF02854	PF03914	0.0137589	0.0195126	0.926333
Glyma.16G012100.1	Glyma.16G012100	PF04802	PF02854	PF03914	0.0274469	0.0287342	0.904796
Glyma.16G012100.2	Glyma.16G012100	PF18137	PF02854	PF03914	0.0080538	0.0163457	0.93511
Glyma.16G012100.5	Glyma.16G012100	PF10193	PF18137	PF03914	0.0118513	0.0492209	0.861436
Glyma.16G012100.6	Glyma.16G012100	PF18137	PF13716	PF03914	0.0184302	0.0487435	0.83266
Glyma.16G019800.1	Glyma.16G019800	PF00717	PF00481	PF07228	0.0770171	0.0782805	0.115212
Glyma.16G019800.2	Glyma.16G019800	PF05239	PF00481	PF07228	0.0774937	0.141636	0.300709
Glyma.16G029100.1	Glyma.16G029100	PF03629	PF13472	PF00657	0.00018359	0.0935863	0.905656
Glyma.16G182500.5	Glyma.16G182500	PF00294	PF00481	PF00082	0.000122101	0.000188635	0.998953
Glyma.16G182500.6	Glyma.16G182500	PF00294	PF01975	PF00082	0.0386285	0.0685458	0.736694
Glyma.16G094200.1	Glyma.16G094200	PF11926	PF08652	PF00169	0.0556943	0.103498	0.170545
Glyma.16G070800.1	Glyma.16G070800	PF00635	PF00849	PF05047	0.0662172	0.121824	0.163045
Glyma.16G070800.3	Glyma.16G070800	PF00849	PF05047	PF00635	0.10109	0.104317	0.124424
Glyma.16G049200.2	Glyma.16G049200	PF00505	PF10252	PF04419	0.125951	0.195213	0.214301
Glyma.16G049200.1	Glyma.16G049200	PF04419	PF00505	PF04935	0.0778647	0.16464	0.190925
Glyma.16G197500.2	Glyma.16G197500	PF04389	PF00725	PF02776	0.033402	0.0431757	0.0693285
Glyma.16G105400.1	Glyma.16G105400	PF17177	PF17874	PF12862	0.0867812	0.171859	0.500358
Glyma.16G016551.1	Glyma.16G016551	PF00046	PF02845	PF00631	0.0692503	0.0702587	0.151075
Glyma.16G005700.1	Glyma.16G005700	PF00190	PF02338	PF07145	0.0357964	0.0759793	0.599712
Glyma.16G005700.3	Glyma.16G005700	PF00481	PF02338	PF07145	0.0187561	0.0344191	0.820412
Glyma.16G005700.7	Glyma.16G005700	PF00481	PF02338	PF07145	0.0396296	0.0677317	0.608704
Glyma.16G005700.2	Glyma.16G005700	PF00481	PF02338	PF07145	0.0172438	0.0325395	0.827097
Glyma.16G005700.4	Glyma.16G005700	PF00481	PF02338	PF07145	0.0274923	0.128213	0.609348
Glyma.16G066000.1	Glyma.16G066000	PF08511	PF00042	PF17177	0.121286	0.195157	0.209263
Glyma.16G043500.1	Glyma.16G043500	PF01094	PF00704	PF03572	0.0569079	0.0819383	0.133227
Glyma.16G043500.3	Glyma.16G043500	PF01823	PF01094	PF00026	0.0675307	0.0770307	0.132358
Glyma.16G043500.4	Glyma.16G043500	PF01094	PF00497	PF02541	0.031766	0.125185	0.468377
Glyma.16G088900.1	Glyma.16G088900	PF00076	PF00271	PF00903	0.0178855	0.0355405	0.345537
Glyma.16G105300.3	Glyma.16G105300	PF08241	PF05686	PF03016	0.00954057	0.443774	0.445066
Glyma.16G203800.1	Glyma.16G203800	PF07814	PF13679	PF11919	0.0744601	0.0780664	0.165495
Glyma.16G159400.1	Glyma.16G159400	PF00888	PF00685	PF00210	0.0360418	0.0847531	0.100914
Glyma.16G116000.1	Glyma.16G116000	PF00933	PF01915	PF00082	4.54159e-05	8.46301e-05	0.999622
Glyma.16G116000.3	Glyma.16G116000	PF00109	PF01915	PF00082	7.30597e-05	8.34384e-05	0.999525
Glyma.16G084700.1	Glyma.16G084700	PF00454	PF07714	PF00069	2.4081e-06	0.0171999	0.982784
Glyma.16G193532.1	Glyma.16G193532	PF01273	PF04424	PF00307	0.0557072	0.0860159	0.103432
Glyma.16G183400.1	Glyma.16G183400	PF00128	PF00069	PF02469	0.0933767	0.122327	0.242662
Glyma.16G183400.2	Glyma.16G183400	PF01273	PF02469	PF00307	0.0842887	0.115198	0.155155
Glyma.16G095100.1	Glyma.16G095100	PF03151	PF00999	PF00361	0.121413	0.200628	0.335603
Glyma.16G121000.1	Glyma.16G121000	PF05699	PF00472	PF01778	0.0584681	0.0785487	0.15161
Glyma.16G192500.1	Glyma.16G192500	PF05047	PF00472	PF02179	0.0277663	0.0462263	0.0556861
Glyma.16G123100.1	Glyma.16G123100	PF00076	PF03732	PF07647	0.0565487	0.0878832	0.114085
Glyma.16G010000.1	Glyma.16G010000	PF07557	PF00808	PF02037	0.0644112	0.169915	0.180368
Glyma.16G059900.2	Glyma.16G059900	PF10551	PF03501	PF01775	0.0503986	0.0549734	0.0956886
Glyma.16G059900.1	Glyma.16G059900	PF13456	PF05699	PF10551	0.0341553	0.0487133	0.0634691
Glyma.16G128200.1	Glyma.16G128200	PF05175	PF08241	PF00091	0.117948	0.131649	0.163761
Glyma.16G210300.1	Glyma.16G210300	PF00657	PF11721	PF01094	0.0472154	0.0519979	0.0734125
Glyma.16G210300.4	Glyma.16G210300	PF00657	PF11721	PF01094	0.0472154	0.0519979	0.0734125
Glyma.16G210300.3	Glyma.16G210300	PF00657	PF11721	PF01094	0.0472154	0.0519979	0.0734125
Glyma.16G210300.2	Glyma.16G210300	PF00657	PF11721	PF01094	0.0472154	0.0519979	0.0734125
Glyma.16G210300.5	Glyma.16G210300	PF00646	PF01636	PF00069	0.0384801	0.054549	0.0802811
Glyma.16G199400.1	Glyma.16G199400	PF00249	PF07714	PF00069	3.23617e-05	0.0192395	0.980665
Glyma.16G069200.1	Glyma.16G069200	PF01636	PF07714	PF00069	2.12499e-05	0.0194867	0.980455
Glyma.16G072500.1	Glyma.16G072500	PF00501	PF13456	PF00307	0.0445997	0.0451405	0.0874441
Glyma.16G216300.3	Glyma.16G216300	PF01399	PF10377	PF09763	0.049802	0.0577394	0.217412
Glyma.16G216300.1	Glyma.16G216300	PF02179	PF10377	PF09763	0.0731378	0.0795263	0.164496
Glyma.16G159850.1	Glyma.16G159850	PF00141	PF00307	PF00171	0.0227974	0.0316155	0.0370321
Glyma.16G177300.1	Glyma.16G177300	PF01612	PF02195	PF13409	0.046613	0.0656793	0.119472
Glyma.16G177300.2	Glyma.16G177300	PF01612	PF02195	PF13409	0.046613	0.0656793	0.119472
Glyma.16G056800.1	Glyma.16G056800	PF10453	PF00635	PF00011	0.0460585	0.0867699	0.0953252
Glyma.16G116932.1	Glyma.16G116932	PF03031	PF13456	PF08646	0.0408216	0.120056	0.133014
Glyma.16G008800.1	Glyma.16G008800	PF00010	PF00125	PF05687	0.0590022	0.0631221	0.256947
Glyma.16G129000.3	Glyma.16G129000	PF01485	PF00754	PF00059	0.0659185	0.0797161	0.122594
Glyma.16G129000.1	Glyma.16G129000	PF10497	PF04828	PF01485	0.0658331	0.111101	0.188747
Glyma.16G201900.4	Glyma.16G201900	PF00089	PF07714	PF00069	6.98882e-05	0.0494905	0.950238
Glyma.16G201900.5	Glyma.16G201900	PF00089	PF07714	PF00069	0.00328	0.112724	0.865919
Glyma.16G201900.1	Glyma.16G201900	PF03024	PF00024	PF14380	0.0696957	0.137045	0.479785
Glyma.16G181300.1	Glyma.16G181300	PF01658	PF00198	PF00591	0.0610906	0.0925936	0.128019
Glyma.16G181300.2	Glyma.16G181300	PF00198	PF00591	PF00248	0.051279	0.0591576	0.0813511
Glyma.16G181300.3	Glyma.16G181300	PF02737	PF03446	PF00107	0.099991	0.185668	0.21237
Glyma.16G157500.1	Glyma.16G157500	PF00139	PF14543	PF00026	0.159135	0.266121	0.388754
Glyma.16G137200.1	Glyma.16G137200	PF13401	PF00004	PF00931	0.0151286	0.0518524	0.884374
Glyma.16G146000.1	Glyma.16G146000	PF00472	PF00168	PF00307	0.0480728	0.0636595	0.202859
Glyma.16G100400.1	Glyma.16G100400	PF13947	PF00234	PF14368	0.135713	0.161528	0.169455
Glyma.16G024400.3	Glyma.16G024400	PF00271	PF00270	PF00156	0.0683517	0.0952042	0.236464
Glyma.16G066400.1	Glyma.16G066400	PF00999	PF00916	PF03522	0.035001	0.0860389	0.402656
Glyma.16G066400.2	Glyma.16G066400	PF00615	PF00916	PF03522	0.0377931	0.0602427	0.381068
Glyma.16G011900.1	Glyma.16G011900	PF00168	PF00550	PF05678	0.0616588	0.151869	0.214954
Glyma.16G011701.1	Glyma.16G011701	PF02897	PF00251	PF09346	0.0754326	0.137441	0.274857
Glyma.16G011701.2	Glyma.16G011701	PF02897	PF00251	PF09346	0.0754326	0.137441	0.274857
Glyma.16G123451.1	Glyma.16G123451	PF00010	PF00170	PF07716	0.0498557	0.278052	0.613416
Glyma.16G031200.7	Glyma.16G031200	PF13456	PF00931	PF14111	0.0712479	0.158958	0.319432
Glyma.16G031200.8	Glyma.16G031200	PF13456	PF00931	PF14111	0.0712479	0.158958	0.319432
Glyma.16G031200.9	Glyma.16G031200	PF13456	PF00931	PF14111	0.0712479	0.158958	0.319432
Glyma.16G031200.10	Glyma.16G031200	PF13456	PF00931	PF14111	0.0712479	0.158958	0.319432
Glyma.16G031200.11	Glyma.16G031200	PF14111	PF13966	PF00931	0.0783408	0.0914707	0.336537
Glyma.16G031200.12	Glyma.16G031200	PF14111	PF13966	PF00931	0.0783408	0.0914707	0.336537
Glyma.16G031200.1	Glyma.16G031200	PF14111	PF13966	PF00931	0.0783408	0.0914707	0.336537
Glyma.16G031200.13	Glyma.16G031200	PF14111	PF13966	PF00931	0.0783408	0.0914707	0.336537
Glyma.16G031200.14	Glyma.16G031200	PF14111	PF13966	PF00931	0.0783408	0.0914707	0.336537
Glyma.16G047900.1	Glyma.16G047900	PF12656	PF10419	PF09816	0.079567	0.195761	0.373172
Glyma.16G013000.1	Glyma.16G013000	PF12171	PF13891	PF06747	0.05534	0.0806653	0.361969
Glyma.16G188100.1	Glyma.16G188100	PF00443	PF02469	PF00069	0.0485456	0.0563601	0.214007
Glyma.16G166950.1	Glyma.16G166950	PF00027	PF00089	PF01105	0.0385748	0.0440968	0.0605804
Glyma.16G185100.2	Glyma.16G185100	PF00069	PF00754	PF00128	0.0622514	0.0881824	0.178456
Glyma.16G185100.1	Glyma.16G185100	PF00754	PF00069	PF00128	0.097698	0.108405	0.126024
Glyma.16G095200.1	Glyma.16G095200	PF00010	PF00170	PF07716	0.0194328	0.321136	0.654776
Glyma.16G182700.1	Glyma.16G182700	PF00754	PF00128	PF00704	0.0688486	0.0803181	0.184198
Glyma.16G154200.1	Glyma.16G154200	PF10496	PF05008	PF09177	0.0617943	0.330944	0.429037
Glyma.16G112500.1	Glyma.16G112500	PF00909	PF00689	PF01699	0.0526662	0.117981	0.312043
Glyma.16G214557.1	Glyma.16G214557	PF00646	PF14560	PF00931	0.0742342	0.0943167	0.485153
Glyma.16G058400.3	Glyma.16G058400	PF12862	PF17874	PF17177	0.0937882	0.105487	0.642498
Glyma.16G058400.1	Glyma.16G058400	PF12862	PF17874	PF17177	0.0968343	0.177971	0.505131
Glyma.16G058400.2	Glyma.16G058400	PF12862	PF17874	PF17177	0.0961557	0.178426	0.504423
Glyma.16G031500.1	Glyma.16G031500	PF00135	PF01301	PF00685	0.0794413	0.0938394	0.142578
Glyma.16G197550.1	Glyma.16G197550	PF00190	PF07883	PF03171	0.0180097	0.0309399	0.933794
Glyma.16G058000.3	Glyma.16G058000	PF14372	PF08718	PF05699	0.0628138	0.0765532	0.156206
Glyma.16G058000.5	Glyma.16G058000	PF14372	PF08718	PF05699	0.0628138	0.0765532	0.156206
Glyma.16G058000.4	Glyma.16G058000	PF14372	PF08718	PF05699	0.0628138	0.0765532	0.156206
Glyma.16G058000.2	Glyma.16G058000	PF01399	PF14372	PF05699	0.0441701	0.0581625	0.109268
Glyma.16G058000.6	Glyma.16G058000	PF01399	PF14372	PF05699	0.0441701	0.0581625	0.109268
Glyma.16G058000.7	Glyma.16G058000	PF01399	PF14372	PF05699	0.0441701	0.0581625	0.109268
Glyma.16G058000.8	Glyma.16G058000	PF07727	PF03061	PF05699	0.0498771	0.0510194	0.146018
Glyma.16G137600.1	Glyma.16G137600	PF00004	PF17874	PF00931	0.011162	0.0142412	0.966305
Glyma.16G070300.1	Glyma.16G070300	PF09759	PF12348	PF12717	0.116062	0.151833	0.246113
Glyma.16G127200.1	Glyma.16G127200	PF13086	PF00498	PF00098	0.0102314	0.0219276	0.910805
Glyma.16G168650.1	Glyma.16G168650	PF05529	PF07885	PF00361	0.0428942	0.0567712	0.059347
Glyma.16G055300.1	Glyma.16G055300	PF02469	PF00141	PF04043	0.00866403	0.0400281	0.902752
Glyma.16G034400.1	Glyma.16G034400	PF01852	PF08662	PF12894	0.080963	0.204039	0.231129
Glyma.16G034400.2	Glyma.16G034400	PF01852	PF08662	PF12894	0.080963	0.204039	0.231129
Glyma.16G034400.4	Glyma.16G034400	PF00089	PF12894	PF08662	0.118654	0.213647	0.370309
Glyma.16G034400.3	Glyma.16G034400	PF00089	PF12894	PF08662	0.118654	0.213647	0.370309
Glyma.16G100300.2	Glyma.16G100300	PF03732	PF00615	PF05699	0.0390838	0.0431074	0.233641
Glyma.16G026600.1	Glyma.16G026600	PF00685	PF02362	PF14416	3.84124e-05	0.000186323	0.999551
Glyma.16G140500.1	Glyma.16G140500	PF00472	PF04774	PF05678	0.0762428	0.0885803	0.105518
Glyma.16G207100.1	Glyma.16G207100	PF03171	PF13640	PF13532	0.0215259	0.0669902	0.902307
Glyma.16G107000.1	Glyma.16G107000	PF04893	PF01061	PF06813	0.00281148	0.0330127	0.947333
Glyma.16G107000.2	Glyma.16G107000	PF06454	PF01061	PF06813	0.0486817	0.118883	0.221766
Glyma.16G019300.1	Glyma.16G019300	PF01975	PF01915	PF00082	0.000271684	0.000690108	0.998353
Glyma.16G193900.1	Glyma.16G193900	PF00754	PF00141	PF00069	0.0785096	0.0935094	0.225283
Glyma.16G071600.1	Glyma.16G071600	PF02714	PF07885	PF00361	0.0610272	0.0696364	0.0860657
Glyma.16G115600.1	Glyma.16G115600	PF00155	PF17177	PF14432	0.000428652	0.0426563	0.951074
Glyma.16G140100.2	Glyma.16G140100	PF01966	PF03936	PF13456	0.0621898	0.0959676	0.288855
Glyma.16G210900.1	Glyma.16G210900	PF05770	PF00168	PF07000	0.00985658	0.0183024	0.857893
Glyma.16G210900.5	Glyma.16G210900	PF05770	PF00168	PF07000	0.00985657	0.0183025	0.857893
Glyma.16G169000.1	Glyma.16G169000	PF00026	PF11721	PF07970	0.138806	0.141888	0.188551
Glyma.16G114300.1	Glyma.16G114300	PF00501	PF13302	PF02771	0.0300001	0.0425575	0.0491295
Glyma.16G146300.2	Glyma.16G146300	PF04419	PF12171	PF12999	0.0567353	0.0637374	0.124198
Glyma.16G140400.1	Glyma.16G140400	PF02906	PF00646	PF08387	0.0557789	0.0860474	0.157404
Glyma.16G008500.1	Glyma.16G008500	PF00454	PF07714	PF00069	4.16013e-06	0.0212683	0.978724
Glyma.16G084100.1	Glyma.16G084100	PF12717	PF01399	PF09763	0.113832	0.159922	0.305936
Glyma.16G061500.1	Glyma.16G061500	PF07766	PF01145	PF01281	0.0260614	0.0457756	0.845758
Glyma.16G124650.1	Glyma.16G124650	PF13456	PF10536	PF00646	0.0244104	0.0438339	0.046947
Glyma.16G096800.1	Glyma.16G096800	PF07766	PF01248	PF12333	0.0716531	0.127813	0.340707
Glyma.16G203400.1	Glyma.16G203400	PF13919	PF06221	PF04438	0.00468428	0.00730022	0.983609
Glyma.16G153600.1	Glyma.16G153600	PF00361	PF04043	PF07885	0.0352626	0.0414166	0.0421924
Glyma.16G201500.1	Glyma.16G201500	PF00010	PF07714	PF00069	0.000126944	0.0295035	0.970153
Glyma.16G075350.1	Glyma.16G075350	PF07885	PF00909	PF00361	0.0471631	0.0786299	0.194671
Glyma.16G079100.2	Glyma.16G079100	PF02854	PF01399	PF08492	0.0961745	0.108138	0.505138
Glyma.16G079100.3	Glyma.16G079100	PF02854	PF01399	PF08492	0.0961745	0.108138	0.505138
Glyma.16G206600.3	Glyma.16G206600	PF00441	PF14432	PF17177	0.0590085	0.0899666	0.0974522
Glyma.16G037300.1	Glyma.16G037300	PF00856	PF07717	PF00685	0.0229722	0.0259074	0.0337654
Glyma.16G185950.1	Glyma.16G185950	PF00134	PF05699	PF00010	0.0308827	0.0452607	0.0625357
Glyma.16G211300.3	Glyma.16G211300	PF17035	PF16679	PF04825	0.0963687	0.120958	0.356596
Glyma.16G211300.1	Glyma.16G211300	PF02201	PF16679	PF04825	0.153525	0.156937	0.22191
Glyma.16G074700.1	Glyma.16G074700	PF08241	PF03016	PF05686	0.0244611	0.275086	0.528729
Glyma.16G148100.2	Glyma.16G148100	PF00027	PF07885	PF06472	0.0299763	0.0695278	0.0861645
Glyma.16G148100.1	Glyma.16G148100	PF00027	PF07885	PF06472	0.0299763	0.0695278	0.0861645
Glyma.16G063400.1	Glyma.16G063400	PF14634	PF13639	PF00097	0.0380152	0.0817746	0.86639
Glyma.16G063400.2	Glyma.16G063400	PF14634	PF13639	PF00097	0.0314115	0.0609241	0.89143
Glyma.16G063400.3	Glyma.16G063400	PF13639	PF14634	PF00097	0.0470483	0.0724254	0.854134
Glyma.16G216500.3	Glyma.16G216500	PF06813	PF01699	PF00892	0.0850814	0.0984983	0.35374
Glyma.16G211800.1	Glyma.16G211800	PF08212	PF00026	PF02221	0.0738459	0.12376	0.420383
Glyma.16G093100.1	Glyma.16G093100	PF00171	PF00307	PF13456	0.0281479	0.0787224	0.21224
Glyma.16G055000.3	Glyma.16G055000	PF00955	PF00361	PF13664	0.0728177	0.0751861	0.13039
Glyma.16G147500.1	Glyma.16G147500	PF05687	PF07145	PF05627	0.119263	0.142779	0.150093
Glyma.16G001900.1	Glyma.16G001900	PF17172	PF13417	PF13409	0.00888229	0.126115	0.86378
Glyma.16G181100.2	Glyma.16G181100	PF10075	PF08718	PF04043	0.0700343	0.0902367	0.193723
Glyma.16G181100.3	Glyma.16G181100	PF07727	PF13456	PF00294	0.0512581	0.0603916	0.0861455
Glyma.16G181100.4	Glyma.16G181100	PF13456	PF00814	PF00294	0.0471692	0.0488353	0.0897556
Glyma.16G045300.1	Glyma.16G045300	PF10545	PF00319	PF00646	0.0565079	0.0826558	0.094604
Glyma.16G012200.2	Glyma.16G012200	PF00270	PF04851	PF00271	0.123597	0.192108	0.233932
Glyma.16G012200.1	Glyma.16G012200	PF00270	PF04851	PF00271	0.11448	0.135321	0.30445
Glyma.16G097300.1	Glyma.16G097300	PF01553	PF10536	PF00487	0.0896745	0.0980909	0.175126
Glyma.16G097300.2	Glyma.16G097300	PF01553	PF10536	PF00487	0.0793951	0.0947015	0.190949
Glyma.16G048802.1	Glyma.16G048802	PF00754	PF01095	PF00622	0.114714	0.125952	0.216125
Glyma.16G038666.1	Glyma.16G038666	PF00024	PF00188	PF00089	0.0456672	0.131598	0.322858
Glyma.16G168300.3	Glyma.16G168300	PF08790	PF02892	PF12171	0.0357422	0.0440063	0.721209
Glyma.16G168300.2	Glyma.16G168300	PF08573	PF08790	PF12171	0.0489691	0.0990485	0.642609
Glyma.16G168300.9	Glyma.16G168300	PF08790	PF13878	PF12171	0.137143	0.269087	0.281776
Glyma.16G129300.2	Glyma.16G129300	PF08389	PF00931	PF00646	0.0910191	0.0967163	0.155518
Glyma.16G055800.1	Glyma.16G055800	PF00909	PF01061	PF06813	0.00262391	0.016488	0.96673
Glyma.16G003100.1	Glyma.16G003100	PF00102	PF16486	PF02926	0.056278	0.117501	0.163757
Glyma.16G003100.2	Glyma.16G003100	PF01918	PF03101	PF03108	0.117017	0.124649	0.131947
Glyma.16G091300.1	Glyma.16G091300	PF00010	PF03962	PF00319	0.000173574	0.000313754	0.99916
Glyma.16G091300.2	Glyma.16G091300	PF07716	PF00010	PF00319	4.63815e-05	8.36038e-05	0.999624
Glyma.16G190500.1	Glyma.16G190500	PF00141	PF00128	PF00069	0.0693996	0.085921	0.0904514
Glyma.16G161500.3	Glyma.16G161500	PF00249	PF02902	PF00069	0.0594371	0.172425	0.277758
Glyma.16G161500.2	Glyma.16G161500	PF00249	PF02902	PF00069	0.0594371	0.172425	0.277758
Glyma.16G161500.6	Glyma.16G161500	PF05641	PF00069	PF02902	0.0595163	0.112959	0.149929
Glyma.16G161500.5	Glyma.16G161500	PF05641	PF00069	PF02902	0.0595163	0.112959	0.149929
Glyma.16G068000.1	Glyma.16G068000	PF03446	PF00056	PF03143	2.49065e-05	2.97135e-05	0.999654
Glyma.16G015200.1	Glyma.16G015200	PF00505	PF13891	PF01541	0.0770632	0.0794307	0.0933252
Glyma.16G121800.1	Glyma.16G121800	PF13409	PF14237	PF01553	0.0284684	0.0314655	0.0323057
Glyma.16G057200.2	Glyma.16G057200	PF13456	PF04182	PF00307	0.0254948	0.080995	0.0926156
Glyma.16G221500.1	Glyma.16G221500	PF14383	PF17035	PF02179	0.0444396	0.205048	0.356692
Glyma.16G131200.1	Glyma.16G131200	PF01432	PF00085	PF00903	0.029927	0.0306415	0.0306658
Glyma.16G076100.1	Glyma.16G076100	PF01734	PF05699	PF01823	0.0461056	0.0677659	0.0792896
Glyma.16G076100.2	Glyma.16G076100	PF00644	PF05699	PF01823	0.044708	0.0675081	0.162117
Glyma.16G076100.3	Glyma.16G076100	PF00890	PF01823	PF05699	0.0312122	0.0432036	0.0766274
Glyma.16G076100.4	Glyma.16G076100	PF00249	PF01494	PF01734	0.0438812	0.0461501	0.0749444
Glyma.16G156000.1	Glyma.16G156000	PF00024	PF00615	PF06839	0.102381	0.14216	0.175825
Glyma.16G109100.1	Glyma.16G109100	PF01699	PF01061	PF06813	0.0797942	0.150981	0.219615
Glyma.16G109100.2	Glyma.16G109100	PF00892	PF01699	PF06813	0.111476	0.123266	0.294342
Glyma.16G098200.1	Glyma.16G098200	PF02453	PF05529	PF07885	0.0357156	0.0510188	0.0727445
Glyma.16G015600.1	Glyma.16G015600	PF14111	PF01553	PF07766	0.0357203	0.040012	0.565843
Glyma.16G160500.1	Glyma.16G160500	PF08387	PF12937	PF00646	0.00465315	0.289536	0.69329
Glyma.16G204500.1	Glyma.16G204500	PF06424	PF14364	PF13259	0.073659	0.0784657	0.133872
Glyma.16G076866.1	Glyma.16G076866	PF00361	PF13966	PF05699	0.0195829	0.024063	0.0243186
Glyma.16G081300.2	Glyma.16G081300	PF10545	PF14303	PF12776	0.00926012	0.0150766	0.968759
Glyma.16G081300.3	Glyma.16G081300	PF10545	PF14303	PF12776	0.00926012	0.0150766	0.968759
Glyma.16G159700.1	Glyma.16G159700	PF13401	PF00004	PF00931	0.0948813	0.350209	0.450583
Glyma.16G159700.2	Glyma.16G159700	PF13401	PF00004	PF00931	0.0847705	0.318256	0.508887
Glyma.16G159700.3	Glyma.16G159700	PF00004	PF00646	PF00931	0.0136044	0.0242373	0.934569
Glyma.16G159700.4	Glyma.16G159700	PF13401	PF00004	PF00931	0.0375013	0.376692	0.536896
Glyma.16G169400.1	Glyma.16G169400	PF01273	PF00069	PF02469	0.123267	0.141863	0.273038
Glyma.16G074100.1	Glyma.16G074100	PF07731	PF00443	PF00135	0.0217524	0.0442734	0.0692481
Glyma.16G196400.1	Glyma.16G196400	PF00651	PF01753	PF12796	0.0462645	0.0576085	0.480564
Glyma.16G196400.2	Glyma.16G196400	PF00651	PF00856	PF12796	0.0169746	0.0217696	0.860048
Glyma.16G172200.2	Glyma.16G172200	PF00931	PF00646	PF00069	0.116792	0.129306	0.135359
Glyma.16G172200.1	Glyma.16G172200	PF00931	PF00646	PF00069	0.116792	0.129306	0.135359
Glyma.16G094250.1	Glyma.16G094250	PF00188	PF00139	PF00141	0.0365792	0.03807	0.0720724
Glyma.16G053067.1	Glyma.16G053067	PF13456	PF12937	PF00646	0.0545175	0.055637	0.199807
Glyma.16G216700.1	Glyma.16G216700	PF03016	PF05686	PF04572	0.0431467	0.0483164	0.517152
Glyma.16G216700.2	Glyma.16G216700	PF01074	PF09258	PF04572	0.0381136	0.0408482	0.573251
Glyma.16G033400.4	Glyma.16G033400	PF00060	PF01145	PF01435	0.0370817	0.0509321	0.118475
Glyma.16G033400.5	Glyma.16G033400	PF00060	PF01145	PF01435	0.0370817	0.0509321	0.118475
Glyma.16G121700.1	Glyma.16G121700	PF08241	PF13532	PF13640	0.00102386	0.0072338	0.988646
Glyma.16G121700.2	Glyma.16G121700	PF03171	PF13532	PF13640	0.000979253	0.00580207	0.989343
Glyma.16G118300.1	Glyma.16G118300	PF00646	PF00501	PF00134	0.0365619	0.0393147	0.096577
Glyma.16G202050.1	Glyma.16G202050	PF14380	PF00234	PF13947	0.0865298	0.134134	0.156355
Glyma.16G187900.2	Glyma.16G187900	PF00754	PF00059	PF00069	0.132147	0.148323	0.19936
Glyma.16G004700.2	Glyma.16G004700	PF07885	PF08510	PF07884	0.0617278	0.199016	0.318961
Glyma.16G004700.6	Glyma.16G004700	PF07885	PF08510	PF07884	0.0617278	0.199016	0.318961
Glyma.16G004700.3	Glyma.16G004700	PF07885	PF08510	PF07884	0.0617278	0.199016	0.318961
Glyma.16G004700.7	Glyma.16G004700	PF07885	PF08510	PF07884	0.0617278	0.199016	0.318961
Glyma.16G004700.8	Glyma.16G004700	PF00361	PF07885	PF13664	0.0912977	0.120449	0.203469
Glyma.16G004700.9	Glyma.16G004700	PF13664	PF02453	PF13962	0.0917777	0.11095	0.152656
Glyma.16G130300.1	Glyma.16G130300	PF01699	PF00909	PF00137	0.000537946	0.000781515	0.997418
Glyma.16G147400.1	Glyma.16G147400	PF00004	PF17874	PF00931	0.0064374	0.00912547	0.948574
Glyma.16G147400.2	Glyma.16G147400	PF00481	PF00004	PF00931	0.0174309	0.0230422	0.807496
Glyma.16G095800.1	Glyma.16G095800	PF03372	PF00535	PF12706	0.0818482	0.0896803	0.0923957
Glyma.16G026500.1	Glyma.16G026500	PF00689	PF00361	PF00892	0.0714506	0.0753175	0.088188
Glyma.16G071200.1	Glyma.16G071200	PF12937	PF00646	PF18511	0.0907232	0.412995	0.413832
Glyma.16G072100.1	Glyma.16G072100	PF01061	PF07885	PF00361	0.0814401	0.136969	0.155825
Glyma.16G202200.1	Glyma.16G202200	PF00089	PF07714	PF00069	5.7867e-05	0.045071	0.9548
Glyma.16G202200.9	Glyma.16G202200	PF00089	PF07714	PF00069	1.42311e-05	0.0286361	0.971312
Glyma.16G202200.3	Glyma.16G202200	PF13947	PF00024	PF14380	0.0479049	0.131688	0.502501
Glyma.16G220000.1	Glyma.16G220000	PF00631	PF02953	PF00307	0.0383191	0.05965	0.0618083
Glyma.16G170400.1	Glyma.16G170400	PF00141	PF00188	PF00135	0.0267137	0.0367762	0.0504278
Glyma.16G078750.1	Glyma.16G078750	PF16845	PF01105	PF00188	0.0485032	0.0498848	0.0614705
Glyma.16G035850.1	Glyma.16G035850	PF02453	PF00690	PF05529	0.100205	0.114326	0.167573
Glyma.16G198200.2	Glyma.16G198200	PF00076	PF02854	PF07744	0.077273	0.0949051	0.0996497
Glyma.16G198200.1	Glyma.16G198200	PF00076	PF02854	PF07744	0.077273	0.0949051	0.0996497
Glyma.16G129750.1	Glyma.16G129750	PF00059	PF14244	PF13456	0.11587	0.16524	0.298886
Glyma.16G130000.1	Glyma.16G130000	PF04059	PF02037	PF00076	0.000255653	0.000345251	0.998838
Glyma.16G130000.2	Glyma.16G130000	PF04059	PF02037	PF00076	0.000184325	0.000430519	0.99899
Glyma.16G221800.1	Glyma.16G221800	PF00085	PF04438	PF03167	0.053997	0.0745435	0.152847
Glyma.16G213500.1	Glyma.16G213500	PF14634	PF00097	PF13639	0.01287	0.144795	0.829344
Glyma.16G124400.4	Glyma.16G124400	PF13460	PF00107	PF02441	0.0583185	0.150015	0.209339
Glyma.16G124400.7	Glyma.16G124400	PF13460	PF00107	PF02441	0.0583183	0.150016	0.209339
Glyma.16G124400.6	Glyma.16G124400	PF13460	PF00107	PF02441	0.0583183	0.150016	0.209339
Glyma.16G124400.2	Glyma.16G124400	PF13460	PF00107	PF02441	0.0583185	0.150015	0.209339
Glyma.16G124400.5	Glyma.16G124400	PF13460	PF00107	PF02441	0.0583185	0.150015	0.209339
Glyma.16G115300.1	Glyma.16G115300	PF00793	PF13180	PF00006	0.0285186	0.0391476	0.786391
Glyma.16G202600.1	Glyma.16G202600	PF07734	PF08268	PF00646	0.0751661	0.129482	0.734151
Glyma.16G154600.1	Glyma.16G154600	PF10520	PF05686	PF03016	0.0494351	0.17314	0.527412
Glyma.16G179700.1	Glyma.16G179700	PF00447	PF03467	PF00076	0.000295246	0.000885521	0.996311
Glyma.16G179700.2	Glyma.16G179700	PF00447	PF03467	PF00076	0.000295246	0.000885521	0.996311
Glyma.16G106800.7	Glyma.16G106800	PF01636	PF07714	PF00069	1.62329e-05	0.0211044	0.978875
Glyma.16G106800.8	Glyma.16G106800	PF01636	PF07714	PF00069	9.43508e-06	0.0205043	0.97948
Glyma.16G106800.9	Glyma.16G106800	PF01636	PF07714	PF00069	9.43508e-06	0.0205043	0.97948
Glyma.16G106800.3	Glyma.16G106800	PF01636	PF07714	PF00069	9.43508e-06	0.0205043	0.97948
Glyma.16G106800.2	Glyma.16G106800	PF01636	PF07714	PF00069	9.27793e-06	0.0197172	0.980268
Glyma.16G106800.10	Glyma.16G106800	PF01636	PF07714	PF00069	8.86281e-06	0.0207917	0.979194
Glyma.16G106800.11	Glyma.16G106800	PF00246	PF07714	PF00069	2.58275e-05	0.0308444	0.969024
Glyma.16G106800.12	Glyma.16G106800	PF00248	PF07714	PF00069	0.000251616	0.031688	0.967833
Glyma.16G106800.14	Glyma.16G106800	PF00249	PF07714	PF00069	4.60217e-05	0.0302028	0.969516
Glyma.16G106800.15	Glyma.16G106800	PF00249	PF07714	PF00069	4.60217e-05	0.0302028	0.969516
Glyma.16G106800.16	Glyma.16G106800	PF00249	PF07714	PF00069	4.60217e-05	0.0302028	0.969516
Glyma.16G106800.13	Glyma.16G106800	PF00249	PF07714	PF00069	4.60217e-05	0.0302028	0.969516
Glyma.16G106800.17	Glyma.16G106800	PF08719	PF13302	PF07647	0.0637503	0.110216	0.118726
Glyma.16G106800.18	Glyma.16G106800	PF08719	PF13302	PF07647	0.0637503	0.110216	0.118726
Glyma.16G106800.19	Glyma.16G106800	PF08719	PF13302	PF07647	0.0637503	0.110216	0.118726
Glyma.16G106800.20	Glyma.16G106800	PF08719	PF13302	PF07647	0.0637503	0.110216	0.118726
Glyma.16G106800.21	Glyma.16G106800	PF08719	PF13302	PF07647	0.0637503	0.110216	0.118726
Glyma.16G208400.22	Glyma.16G208400	PF01399	PF12717	PF00571	0.000899984	0.00097279	0.991638
Glyma.16G208400.23	Glyma.16G208400	PF01399	PF12717	PF00571	0.000899984	0.00097279	0.991638
Glyma.16G208400.24	Glyma.16G208400	PF01399	PF12717	PF00571	0.000899984	0.00097279	0.991638
Glyma.16G208400.25	Glyma.16G208400	PF01399	PF12717	PF00571	0.000899984	0.00097279	0.991638
Glyma.16G208400.29	Glyma.16G208400	PF01399	PF12717	PF00571	0.000899984	0.00097279	0.991638
Glyma.16G208400.28	Glyma.16G208400	PF01399	PF12717	PF00571	0.000899984	0.00097279	0.991638
Glyma.16G208400.2	Glyma.16G208400	PF01399	PF12717	PF00571	0.000899989	0.000972794	0.991638
Glyma.16G208400.26	Glyma.16G208400	PF01399	PF12717	PF00571	0.000899989	0.000972794	0.991638
Glyma.16G208400.27	Glyma.16G208400	PF01399	PF12717	PF00571	0.000899984	0.00097279	0.991638
Glyma.16G208400.11	Glyma.16G208400	PF12717	PF13426	PF00571	3.92804e-05	4.21671e-05	0.999678
Glyma.16G208400.13	Glyma.16G208400	PF12717	PF13426	PF00571	3.92804e-05	4.21671e-05	0.999678
Glyma.16G208400.30	Glyma.16G208400	PF16916	PF00999	PF00571	0.000683229	0.000913442	0.990497
Glyma.16G023651.1	Glyma.16G023651	PF00271	PF10551	PF01423	0.0300742	0.0310443	0.0551005
Glyma.16G165100.1	Glyma.16G165100	PF13088	PF12894	PF08662	0.077903	0.182377	0.695484
Glyma.16G191000.3	Glyma.16G191000	PF00128	PF00069	PF00754	0.0636251	0.0875109	0.170474
Glyma.16G191000.1	Glyma.16G191000	PF00069	PF02469	PF00754	0.0694938	0.103417	0.23755
Glyma.16G015000.1	Glyma.16G015000	PF01636	PF07714	PF00069	0.000494812	0.0415839	0.957536
Glyma.16G009300.1	Glyma.16G009300	PF07727	PF00334	PF00144	0.0103116	0.0488745	0.918008
Glyma.16G009300.3	Glyma.16G009300	PF00254	PF00334	PF00144	0.0225913	0.225223	0.700307
Glyma.16G009300.6	Glyma.16G009300	PF05193	PF00144	PF00334	0.000103759	0.00080535	0.998888
Glyma.16G009300.4	Glyma.16G009300	PF00144	PF00254	PF00334	0.0268293	0.097198	0.826606
Glyma.16G009300.7	Glyma.16G009300	PF05193	PF00144	PF00334	0.000138852	0.000332816	0.999092
Glyma.16G009300.5	Glyma.16G009300	PF05193	PF00144	PF00334	0.000138852	0.000332816	0.999092
Glyma.16G009300.2	Glyma.16G009300	PF00188	PF00254	PF00334	8.64807e-05	0.000109811	0.99939
Glyma.16G160800.3	Glyma.16G160800	PF03101	PF04059	PF00076	0.000203046	0.000920911	0.997968
Glyma.16G160800.1	Glyma.16G160800	PF03101	PF04059	PF00076	0.000203046	0.000920911	0.997968
Glyma.16G047001.1	Glyma.16G047001	PF01476	PF00188	PF00160	0.0256159	0.0291024	0.0292602
Glyma.16G104300.2	Glyma.16G104300	PF00091	PF01565	PF00622	0.0945946	0.102481	0.318812
Glyma.16G083300.1	Glyma.16G083300	PF02195	PF10469	PF00571	0.0619713	0.0842032	0.112522
Glyma.16G146800.1	Glyma.16G146800	PF00234	PF00141	PF04043	0.0884891	0.100436	0.119747
Glyma.16G175800.3	Glyma.16G175800	PF00168	PF00102	PF05641	0.0690425	0.0704376	0.17862
Glyma.16G175800.4	Glyma.16G175800	PF00168	PF00102	PF05641	0.0630871	0.0911493	0.162844
Glyma.16G175800.5	Glyma.16G175800	PF00168	PF00102	PF05641	0.0778203	0.0870146	0.191685
Glyma.16G182600.1	Glyma.16G182600	PF14244	PF00487	PF01553	0.0738513	0.0857938	0.136099
Glyma.16G209700.1	Glyma.16G209700	PF12796	PF17177	PF14432	0.00317314	0.187173	0.761104
Glyma.16G100200.1	Glyma.16G100200	PF00024	PF00651	PF00856	0.00186611	0.00197391	0.989489
Glyma.16G047100.7	Glyma.16G047100	PF01636	PF07714	PF00069	2.72639e-06	0.0198777	0.980101
Glyma.16G047100.8	Glyma.16G047100	PF01636	PF07714	PF00069	1.16744e-05	0.0171815	0.982792
Glyma.16G082600.1	Glyma.16G082600	PF13091	PF01636	PF00498	0.0373179	0.0427758	0.133367
Glyma.16G115566.1	Glyma.16G115566	PF13664	PF07885	PF02453	0.0648528	0.0765113	0.273243
Glyma.16G115566.2	Glyma.16G115566	PF13664	PF07885	PF02453	0.0648528	0.0765113	0.273244
Glyma.16G115566.3	Glyma.16G115566	PF13664	PF07885	PF02453	0.0648528	0.0765113	0.273244
Glyma.16G096200.1	Glyma.16G096200	PF00724	PF13409	PF06094	0.0549524	0.0926902	0.417659
Glyma.16G097102.1	Glyma.16G097102	PF12717	PF03810	PF08389	0.0837015	0.126303	0.136618
Glyma.16G156100.1	Glyma.16G156100	PF02469	PF07714	PF00069	0.000767485	0.065297	0.927158
Glyma.16G036400.5	Glyma.16G036400	PF00134	PF07035	PF00651	8.38667e-05	0.00295413	0.996573
Glyma.16G036400.6	Glyma.16G036400	PF00134	PF07035	PF00651	8.38667e-05	0.00295413	0.996573
Glyma.16G036400.7	Glyma.16G036400	PF00134	PF07035	PF00651	8.38667e-05	0.00295413	0.996573
Glyma.16G036400.8	Glyma.16G036400	PF00134	PF07035	PF00651	0.000177265	0.00145467	0.998083
Glyma.16G036400.3	Glyma.16G036400	PF02214	PF07035	PF00651	0.000113121	0.00168443	0.997906
Glyma.16G143850.1	Glyma.16G143850	PF00171	PF00059	PF00160	0.0188521	0.0289155	0.0417266
Glyma.16G171400.2	Glyma.16G171400	PF01823	PF00754	PF00069	0.0962602	0.108045	0.134392
Glyma.16G171400.1	Glyma.16G171400	PF00026	PF00754	PF11721	0.104627	0.117423	0.142228
Glyma.16G222200.1	Glyma.16G222200	PF01105	PF13456	PF01502	0.0790671	0.146532	0.254688
Glyma.16G119000.1	Glyma.16G119000	PF13570	PF08450	PF03088	0.00472387	0.0131073	0.960608
Glyma.16G076833.1	Glyma.16G076833	PF13962	PF00689	PF02453	0.0358096	0.0365817	0.0382047
Glyma.16G160000.1	Glyma.16G160000	PF00888	PF17177	PF02854	0.0524846	0.086087	0.512442
Glyma.16G160000.5	Glyma.16G160000	PF00888	PF17177	PF02854	0.0524846	0.086087	0.512442
Glyma.16G160000.6	Glyma.16G160000	PF00888	PF17177	PF02854	0.0524846	0.086087	0.512442
Glyma.16G160000.7	Glyma.16G160000	PF00888	PF17177	PF02854	0.0524846	0.086087	0.512442
Glyma.16G160000.4	Glyma.16G160000	PF00888	PF17177	PF02854	0.0524846	0.086087	0.512442
Glyma.16G160000.3	Glyma.16G160000	PF00888	PF17177	PF02854	0.0524846	0.086087	0.512442
Glyma.16G153300.1	Glyma.16G153300	PF14279	PF00293	PF01087	0.00157335	0.00195223	0.9895
Glyma.16G184700.1	Glyma.16G184700	PF08389	PF07714	PF00069	0.0474007	0.106439	0.364203
Glyma.16G016300.2	Glyma.16G016300	PF00246	PF13091	PF03372	0.00612928	0.00831554	0.942209
Glyma.16G016300.1	Glyma.16G016300	PF00246	PF13091	PF03372	0.00461008	0.00697492	0.952098
Glyma.16G209400.1	Glyma.16G209400	PF01926	PF01061	PF00005	0.00342824	0.00531335	0.985916
Glyma.16G021800.1	Glyma.16G021800	PF01926	PF13460	PF02223	0.101873	0.119026	0.20822
Glyma.16G021800.2	Glyma.16G021800	PF01926	PF13460	PF02223	0.071878	0.105883	0.203932
Glyma.16G182200.1	Glyma.16G182200	PF01471	PF04253	PF01145	0.0570607	0.0830597	0.193126
Glyma.16G182200.5	Glyma.16G182200	PF14237	PF02263	PF01145	0.0836568	0.0844873	0.228133
Glyma.16G182200.7	Glyma.16G182200	PF00254	PF02263	PF01145	0.0637845	0.066539	0.205251
Glyma.16G182200.6	Glyma.16G182200	PF00254	PF14237	PF01145	0.0741776	0.089054	0.189168
Glyma.16G182200.4	Glyma.16G182200	PF01471	PF14237	PF01145	0.0761592	0.0868597	0.249312
Glyma.16G182200.2	Glyma.16G182200	PF05236	PF01145	PF14237	0.050121	0.057541	0.0658944
Glyma.16G182200.8	Glyma.16G182200	PF14237	PF05236	PF01145	0.0481479	0.0581709	0.0600456
Glyma.16G182200.3	Glyma.16G182200	PF14237	PF01145	PF11976	0.045085	0.0554928	0.0596389
Glyma.16G102200.2	Glyma.16G102200	PF04266	PF01852	PF02866	0.0414085	0.093255	0.103847
Glyma.16G102200.3	Glyma.16G102200	PF04266	PF01852	PF02866	0.0414085	0.093255	0.103847
Glyma.16G102200.4	Glyma.16G102200	PF00155	PF01852	PF02866	0.0543679	0.0598168	0.0872918
Glyma.16G222100.1	Glyma.16G222100	PF00168	PF00635	PF05678	0.0646514	0.0691541	0.0829172
Glyma.16G005000.1	Glyma.16G005000	PF04893	PF07884	PF13962	0.0359188	0.0441706	0.712791
Glyma.16G053850.1	Glyma.16G053850	PF07885	PF00160	PF00361	0.0542572	0.0543139	0.0767241
Glyma.16G046600.2	Glyma.16G046600	PF00682	PF02867	PF00266	0.0723947	0.0917745	0.136589
Glyma.16G169300.1	Glyma.16G169300	PF00069	PF00754	PF02469	0.0422612	0.161484	0.317392
Glyma.16G144900.1	Glyma.16G144900	PF03629	PF13472	PF00657	1.93544e-05	0.0906533	0.90931
Glyma.16G159000.1	Glyma.16G159000	PF00006	PF00271	PF01423	0.0199571	0.0323953	0.162815
Glyma.16G055500.1	Glyma.16G055500	PF14111	PF01423	PF14244	0.0566791	0.0617729	0.130299
Glyma.16G043100.1	Glyma.16G043100	PF00168	PF00856	PF00754	0.0545611	0.0575951	0.0934833
Glyma.16G172800.1	Glyma.16G172800	PF12796	PF17177	PF14432	0.00111191	0.0395635	0.954712
Glyma.16G016400.1	Glyma.16G016400	PF12766	PF14111	PF00581	0.0372927	0.0393723	0.0394112
Glyma.16G016400.3	Glyma.16G016400	PF09764	PF07731	PF00149	0.0410974	0.0780483	0.112533
Glyma.16G112600.6	Glyma.16G112600	PF06148	PF04100	PF02854	0.0691904	0.0771559	0.0855603
Glyma.16G112600.4	Glyma.16G112600	PF06148	PF04100	PF02854	0.0691904	0.0771559	0.0855603
Glyma.16G112600.1	Glyma.16G112600	PF06148	PF04100	PF02854	0.0691904	0.0771559	0.0855603
Glyma.16G112600.7	Glyma.16G112600	PF06148	PF04100	PF02854	0.0691904	0.0771559	0.0855603
Glyma.16G171700.1	Glyma.16G171700	PF12937	PF00931	PF00646	0.115418	0.213467	0.396244
Glyma.16G211200.1	Glyma.16G211200	PF00249	PF12656	PF08573	0.0690621	0.0910193	0.101194
Glyma.16G211200.2	Glyma.16G211200	PF08698	PF09405	PF12656	0.0966567	0.106929	0.176718
Glyma.16G187566.1	Glyma.16G187566	PF00564	PF00069	PF00089	0.0408633	0.0419564	0.0620987
Glyma.16G194000.6	Glyma.16G194000	PF00781	PF00646	PF02037	0.0741142	0.089571	0.152948
Glyma.16G194000.4	Glyma.16G194000	PF00646	PF00622	PF02037	0.0900122	0.0946609	0.101157
Glyma.16G194000.3	Glyma.16G194000	PF00646	PF07522	PF02037	0.0469288	0.0725398	0.262209
Glyma.16G128300.1	Glyma.16G128300	PF00505	PF02201	PF00249	0.0542921	0.0584489	0.733604
Glyma.16G128300.4	Glyma.16G128300	PF00505	PF02201	PF00249	0.0542921	0.0584489	0.733604
Glyma.16G128300.2	Glyma.16G128300	PF00505	PF02201	PF00249	0.0685883	0.0784481	0.586545
Glyma.16G015100.1	Glyma.16G015100	PF00884	PF03372	PF00149	0.0021623	0.00263755	0.992783
Glyma.16G015100.3	Glyma.16G015100	PF00884	PF03372	PF00149	0.00298769	0.00646833	0.987237
Glyma.16G212500.1	Glyma.16G212500	PF03088	PF00026	PF02221	0.0761658	0.145074	0.4817
Glyma.16G057300.1	Glyma.16G057300	PF13088	PF03478	PF00646	0.0623787	0.155259	0.45524
Glyma.16G041500.1	Glyma.16G041500	PF07727	PF07714	PF00069	0.000119371	0.0440418	0.95512
Glyma.16G195200.1	Glyma.16G195200	PF05529	PF00361	PF07885	0.0573896	0.063698	0.0682782
Glyma.16G102000.1	Glyma.16G102000	PF12171	PF00443	PF02892	0.192445	0.260365	0.333461
Glyma.16G063500.1	Glyma.16G063500	PF12937	PF08268	PF00646	0.0434531	0.0702681	0.84933
Glyma.16G022700.1	Glyma.16G022700	PF00487	PF03798	PF02453	0.103265	0.119065	0.124202
Glyma.16G018700.2	Glyma.16G018700	PF16486	PF08784	PF13867	0.0554037	0.0621223	0.187905
Glyma.16G031900.1	Glyma.16G031900	PF13891	PF13178	PF00505	0.0487815	0.0731677	0.385389
Glyma.16G076700.1	Glyma.16G076700	PF00168	PF17137	PF13802	0.104704	0.207127	0.229363
Glyma.16G221300.1	Glyma.16G221300	PF01756	PF17177	PF14432	0.0277969	0.405136	0.416747
Glyma.16G180600.1	Glyma.16G180600	PF13178	PF00505	PF05678	0.0362179	0.0399723	0.0489115
Glyma.16G201000.2	Glyma.16G201000	PF00326	PF07859	PF00135	0.106757	0.336161	0.541756
Glyma.16G201000.3	Glyma.16G201000	PF00326	PF07859	PF00135	0.0912012	0.335474	0.55962
Glyma.16G140300.2	Glyma.16G140300	PF03372	PF07985	PF00650	0.000307945	0.000329383	0.997615
Glyma.16G140300.3	Glyma.16G140300	PF03372	PF07985	PF00650	0.000307945	0.000329383	0.997615
Glyma.16G068100.1	Glyma.16G068100	PF00650	PF04572	PF01553	0.0386346	0.0434577	0.588958
Glyma.16G068100.2	Glyma.16G068100	PF00685	PF00650	PF01553	0.0791348	0.164055	0.212644
Glyma.16G216000.1	Glyma.16G216000	PF00622	PF00856	PF00059	0.0549828	0.0590926	0.0940987
Glyma.16G168600.1	Glyma.16G168600	PF16035	PF00027	PF01553	0.0410415	0.0732631	0.114202
Glyma.16G076000.1	Glyma.16G076000	PF14634	PF00097	PF13639	0.0148121	0.184664	0.788786
Glyma.16G040300.1	Glyma.16G040300	PF06911	PF01138	PF00294	0.0355548	0.0444622	0.054033
Glyma.16G040300.2	Glyma.16G040300	PF00443	PF07970	PF03987	0.0351553	0.0382294	0.0834468
Glyma.16G014500.1	Glyma.16G014500	PF05678	PF00505	PF05627	0.0676937	0.100134	0.409426
Glyma.16G134600.1	Glyma.16G134600	PF01593	PF00891	PF05368	0.111527	0.113141	0.130431
Glyma.16G099000.1	Glyma.16G099000	PF02892	PF05699	PF14372	0.219012	0.255408	0.369582
Glyma.16G003300.1	Glyma.16G003300	PF00027	PF03522	PF00571	0.0586179	0.0619752	0.582702
Glyma.16G003300.2	Glyma.16G003300	PF00690	PF03522	PF00571	0.101125	0.111319	0.234038
Glyma.16G028601.1	Glyma.16G028601	PF13456	PF07727	PF05699	0.0386867	0.0712055	0.0841556
Glyma.16G187851.1	Glyma.16G187851	PF14547	PF14368	PF00234	0.00689691	0.281245	0.711139
Glyma.16G115700.1	Glyma.16G115700	PF00534	PF03016	PF01553	2.38921e-05	8.10498e-05	0.999818
Glyma.16G115700.2	Glyma.16G115700	PF00534	PF03016	PF01553	3.39238e-05	7.63178e-05	0.99986
Glyma.16G115700.5	Glyma.16G115700	PF00892	PF01794	PF01553	0.0148528	0.0623193	0.74357
Glyma.16G058800.1	Glyma.16G058800	PF01738	PF00551	PF00117	0.00104285	0.00300684	0.995343
Glyma.16G212600.1	Glyma.16G212600	PF15985	PF01661	PF02893	0.000163557	0.000304946	0.998924
Glyma.16G052700.1	Glyma.16G052700	PF00307	PF12796	PF01417	0.0754026	0.153098	0.36683
Glyma.16G101100.1	Glyma.16G101100	PF00246	PF01852	PF12819	0.0463811	0.153632	0.202778
Glyma.16G084200.1	Glyma.16G084200	PF01909	PF05057	PF01764	0.00419044	0.0745391	0.867623
Glyma.16G084200.4	Glyma.16G084200	PF06974	PF05057	PF01764	0.00682424	0.137047	0.82901
Glyma.16G084200.3	Glyma.16G084200	PF06974	PF05057	PF01764	0.044428	0.242822	0.566198
Glyma.16G084200.2	Glyma.16G084200	PF06974	PF05057	PF01764	0.044428	0.242822	0.566198
Glyma.16G076400.2	Glyma.16G076400	PF13664	PF13962	PF01794	0.0896853	0.120139	0.444147
Glyma.16G209300.1	Glyma.16G209300	PF01565	PF01734	PF01764	0.0519521	0.0577383	0.0664308
Glyma.16G209300.2	Glyma.16G209300	PF01171	PF00288	PF01734	0.0418482	0.0467829	0.049609
Glyma.16G209300.3	Glyma.16G209300	PF01048	PF02540	PF01734	0.0562405	0.0727369	0.12025
Glyma.16G024100.2	Glyma.16G024100	PF07808	PF12656	PF03468	0.0347183	0.0738385	0.114424
Glyma.16G034700.1	Glyma.16G034700	PF12678	PF00097	PF13639	0.132093	0.216159	0.61941
Glyma.16G062000.1	Glyma.16G062000	PF09118	PF08662	PF13088	0.098512	0.136692	0.14827
Glyma.16G062000.2	Glyma.16G062000	PF08547	PF08662	PF04601	0.0625624	0.144588	0.193973
Glyma.16G077900.1	Glyma.16G077900	PF13640	PF14226	PF03171	9.31957e-05	0.0234816	0.976219
Glyma.16G077900.2	Glyma.16G077900	PF13532	PF14226	PF03171	8.22866e-05	0.0176838	0.982081
Glyma.16G113100.1	Glyma.16G113100	PF00890	PF00732	PF07992	0.0413685	0.0693567	0.851777
Glyma.16G079850.1	Glyma.16G079850	PF01844	PF13966	PF17032	0.107566	0.120413	0.297752
Glyma.16G162000.2	Glyma.16G162000	PF01575	PF03061	PF01137	0.0565127	0.0927519	0.278526
Glyma.16G058900.2	Glyma.16G058900	PF17135	PF12076	PF02357	0.0432125	0.0482641	0.0751236
Glyma.16G058900.1	Glyma.16G058900	PF17135	PF03719	PF00327	0.044443	0.0628214	0.0690295
Glyma.16G074300.3	Glyma.16G074300	PF01636	PF07714	PF00069	2.94067e-06	0.0174882	0.982505
Glyma.16G074300.1	Glyma.16G074300	PF00249	PF07714	PF00069	1.47803e-06	0.0222658	0.977727
Glyma.16G086050.1	Glyma.16G086050	PF14244	PF13966	PF14111	0.093321	0.10713	0.123816
Glyma.16G209500.1	Glyma.16G209500	PF00251	PF00024	PF00059	0.0749312	0.0829493	0.38824
Glyma.16G209500.2	Glyma.16G209500	PF07915	PF00024	PF00059	0.122891	0.152271	0.204044
Glyma.16G030700.1	Glyma.16G030700	PF10260	PF14159	PF02453	0.00334654	0.012743	0.980098
Glyma.16G121250.1	Glyma.16G121250	PF07885	PF04043	PF00141	0.0360575	0.039478	0.0423191
Glyma.16G055200.1	Glyma.16G055200	PF00955	PF01061	PF00361	0.0694827	0.0988155	0.136126
Glyma.16G035800.1	Glyma.16G035800	PF17032	PF00111	PF10276	0.0734454	0.136431	0.196772
Glyma.16G035800.2	Glyma.16G035800	PF08240	PF01592	PF00111	0.0155288	0.0158286	0.872885
Glyma.16G161700.1	Glyma.16G161700	PF03478	PF02140	PF00024	0.0944617	0.0965816	0.147836
Glyma.16G161700.2	Glyma.16G161700	PF03478	PF08268	PF07734	0.119052	0.210071	0.303817
Glyma.16G065900.1	Glyma.16G065900	PF06813	PF00060	PF01061	0.0304345	0.0566415	0.782945
Glyma.16G156300.3	Glyma.16G156300	PF01728	PF01467	PF10213	0.0686592	0.0998656	0.17712
Glyma.16G156300.1	Glyma.16G156300	PF01728	PF01467	PF10213	0.0686592	0.0998656	0.17712
Glyma.16G156300.2	Glyma.16G156300	PF01467	PF01765	PF10213	0.147759	0.168287	0.277116
Glyma.16G179000.1	Glyma.16G179000	PF01095	PF08450	PF12708	0.0594387	0.0877323	0.491713
Glyma.16G075300.1	Glyma.16G075300	PF12678	PF00097	PF13639	0.0363468	0.199242	0.728604
Glyma.16G187700.2	Glyma.16G187700	PF00704	PF00754	PF00069	0.0729487	0.104018	0.109212
Glyma.16G187700.1	Glyma.16G187700	PF00931	PF00069	PF00128	0.0778977	0.0794083	0.103588
Glyma.16G009600.1	Glyma.16G009600	PF00505	PF08698	PF09350	0.0595318	0.171196	0.192234
Glyma.16G159350.1	Glyma.16G159350	PF01476	PF00188	PF01471	0.0463776	0.0489293	0.0525217
Glyma.16G129600.1	Glyma.16G129600	PF00576	PF01541	PF04266	0.0686785	0.10504	0.112095
Glyma.16G095500.1	Glyma.16G095500	PF12171	PF17780	PF00076	0.00106251	0.00262813	0.988845
Glyma.16G216800.8	Glyma.16G216800	PF03016	PF05686	PF04572	0.0246387	0.025459	0.749838
Glyma.16G216800.6	Glyma.16G216800	PF05686	PF03016	PF04572	0.0339665	0.0409573	0.681064
Glyma.16G216800.9	Glyma.16G216800	PF05686	PF03016	PF04572	0.0339665	0.0409573	0.681064
Glyma.16G216800.10	Glyma.16G216800	PF03016	PF05686	PF04572	0.0318258	0.0443754	0.712268
Glyma.16G216800.7	Glyma.16G216800	PF03016	PF05686	PF04572	0.0477332	0.0507696	0.651578
Glyma.16G216800.11	Glyma.16G216800	PF03016	PF05686	PF04572	0.0477332	0.0507696	0.651578
Glyma.16G216800.3	Glyma.16G216800	PF05686	PF03016	PF04572	0.0228338	0.0279101	0.69636
Glyma.16G216800.2	Glyma.16G216800	PF03016	PF05686	PF04572	0.0332541	0.038009	0.67535
Glyma.16G216800.5	Glyma.16G216800	PF05686	PF03016	PF04572	0.0243316	0.0300657	0.683509
Glyma.16G216800.12	Glyma.16G216800	PF05686	PF03016	PF04572	0.0243316	0.0300657	0.683509
Glyma.16G216800.4	Glyma.16G216800	PF03016	PF05686	PF04572	0.0347152	0.0382343	0.655893
Glyma.16G216800.13	Glyma.16G216800	PF03016	PF05686	PF04572	0.0347152	0.0382343	0.655893
Glyma.16G075400.1	Glyma.16G075400	PF05008	PF10496	PF09177	0.154374	0.291371	0.431519
Glyma.16G012600.1	Glyma.16G012600	PF02037	PF00249	PF00505	0.0124991	0.0127271	0.871132
Glyma.16G012600.2	Glyma.16G012600	PF10545	PF02037	PF00505	0.00762339	0.00763695	0.914713
Glyma.16G035700.1	Glyma.16G035700	PF00361	PF00892	PF03151	0.138614	0.140524	0.173436
Glyma.16G210200.2	Glyma.16G210200	PF07808	PF12656	PF07839	0.0492708	0.0728115	0.207023
Glyma.16G148700.1	Glyma.16G148700	PF07145	PF05687	PF00505	0.0784772	0.203534	0.25441
Glyma.16G154800.1	Glyma.16G154800	PF00307	PF10377	PF09763	0.104303	0.159497	0.231878
Glyma.16G200300.1	Glyma.16G200300	PF00724	PF00481	PF00141	7.04076e-07	8.33055e-06	0.999985
Glyma.16G091800.1	Glyma.16G091800	PF00505	PF10545	PF00447	5.22395e-06	8.21161e-06	0.999973
Glyma.16G065600.1	Glyma.16G065600	PF01636	PF07714	PF00069	0.000813683	0.035944	0.962692
Glyma.16G188200.1	Glyma.16G188200	PF14547	PF14368	PF00234	0.0134509	0.243728	0.742162
Glyma.16G183700.1	Glyma.16G183700	PF12656	PF10187	PF02037	0.0856	0.0898888	0.130752
Glyma.16G056000.1	Glyma.16G056000	PF00782	PF00472	PF00443	0.0437584	0.0722565	0.156336
Glyma.16G052200.3	Glyma.16G052200	PF00454	PF07714	PF00069	5.11657e-06	0.0150433	0.984945
Glyma.16G052200.4	Glyma.16G052200	PF00454	PF07714	PF00069	5.11657e-06	0.0150433	0.984945
Glyma.16G213900.1	Glyma.16G213900	PF13401	PF00004	PF00931	0.0507782	0.209615	0.610117
Glyma.16G213900.3	Glyma.16G213900	PF13401	PF00004	PF00931	0.0308057	0.0705105	0.768251
Glyma.16G213900.2	Glyma.16G213900	PF00004	PF16095	PF00931	0.037953	0.0695659	0.720084
Glyma.16G080400.2	Glyma.16G080400	PF01883	PF01106	PF00403	0.00302581	0.00962026	0.986627
Glyma.16G165900.1	Glyma.16G165900	PF13639	PF00097	PF01485	0.17083	0.215873	0.321793
Glyma.16G165900.3	Glyma.16G165900	PF01794	PF00535	PF13632	0.0764043	0.099307	0.259304
Glyma.16G165900.2	Glyma.16G165900	PF01794	PF00535	PF13632	0.0764043	0.099307	0.259304
Glyma.16G217300.2	Glyma.16G217300	PF00271	PF03104	PF16486	0.000451532	0.000986686	0.997199
Glyma.16G217300.1	Glyma.16G217300	PF03104	PF13086	PF16486	0.00123203	0.00142963	0.992983
Glyma.16G166267.1	Glyma.16G166267	PF01661	PF00856	PF00383	0.039258	0.211614	0.61724
Glyma.16G212400.1	Glyma.16G212400	PF08212	PF03330	PF02221	0.109151	0.311156	0.381142
Glyma.16G179200.1	Glyma.16G179200	PF01883	PF01656	PF02374	0.000745969	0.15163	0.846836
Glyma.16G181200.1	Glyma.16G181200	PF00591	PF01661	PF01565	0.0873696	0.0920118	0.0996577
Glyma.16G181200.2	Glyma.16G181200	PF00107	PF00091	PF01565	0.066311	0.0809192	0.126998
Glyma.16G181200.3	Glyma.16G181200	PF00107	PF01565	PF00091	0.0974418	0.134777	0.159469
Glyma.16G156900.1	Glyma.16G156900	PF00909	PF00361	PF13906	0.10636	0.109092	0.441449
Glyma.16G069700.1	Glyma.16G069700	PF02221	PF00635	PF02721	0.0745505	0.119163	0.245394
Glyma.16G029000.2	Glyma.16G029000	PF00010	PF00170	PF07716	0.0120655	0.345327	0.636184
Glyma.16G029000.1	Glyma.16G029000	PF00010	PF00170	PF07716	0.0287034	0.388515	0.574245
Glyma.16G115500.3	Glyma.16G115500	PF00137	PF06813	PF01699	0.0249643	0.0678558	0.85124
Glyma.16G115500.5	Glyma.16G115500	PF00137	PF00999	PF06813	0.0619192	0.0959875	0.4812
Glyma.16G115500.4	Glyma.16G115500	PF00137	PF00999	PF06813	0.0619192	0.0959875	0.4812
Glyma.16G142100.1	Glyma.16G142100	PF04652	PF02453	PF04678	7.89776e-05	0.000248077	0.999325
Glyma.16G156700.1	Glyma.16G156700	PF16953	PF00443	PF13640	0.0496613	0.0673254	0.0818389
Glyma.16G166500.1	Glyma.16G166500	PF02338	PF14432	PF00856	0.013953	0.0314428	0.892377
Glyma.16G166500.2	Glyma.16G166500	PF16953	PF08387	PF14432	0.0641435	0.0939066	0.457301
Glyma.16G166500.4	Glyma.16G166500	PF02892	PF00443	PF00651	0.0996468	0.10854	0.179036
Glyma.16G033800.1	Glyma.16G033800	PF03798	PF01578	PF01794	0.0027436	0.0342038	0.95198
Glyma.16G167800.1	Glyma.16G167800	PF00271	PF00270	PF04851	0.0532371	0.325576	0.587217
Glyma.16G043000.1	Glyma.16G043000	PF12776	PF05641	PF08719	0.0478315	0.116054	0.11664
Glyma.16G083500.1	Glyma.16G083500	PF00307	PF01466	PF13023	0.116427	0.143084	0.147288
Glyma.16G017400.7	Glyma.16G017400	PF10545	PF00505	PF00249	0.00781396	0.0146839	0.965289
Glyma.16G017400.19	Glyma.16G017400	PF10545	PF00505	PF00249	0.00399986	0.00427254	0.983769
Glyma.16G017400.13	Glyma.16G017400	PF10545	PF00505	PF00249	0.00399986	0.00427254	0.983769
Glyma.16G017400.20	Glyma.16G017400	PF10545	PF00505	PF00249	0.00399986	0.00427254	0.983769
Glyma.16G017400.3	Glyma.16G017400	PF10545	PF00505	PF00249	0.00399986	0.00427254	0.983769
Glyma.16G017400.18	Glyma.16G017400	PF10545	PF00505	PF00249	0.00399986	0.00427254	0.983769
Glyma.16G017400.17	Glyma.16G017400	PF10545	PF00505	PF00249	0.00399986	0.00427254	0.983769
Glyma.16G017400.14	Glyma.16G017400	PF10545	PF00505	PF00249	0.00399986	0.00427254	0.983769
Glyma.16G017400.6	Glyma.16G017400	PF10545	PF00505	PF00249	0.00399986	0.00427254	0.983769
Glyma.16G017400.11	Glyma.16G017400	PF10545	PF00505	PF00249	0.00399986	0.00427254	0.983769
Glyma.16G017400.12	Glyma.16G017400	PF10545	PF00505	PF00249	0.00399986	0.00427254	0.983769
Glyma.16G017400.16	Glyma.16G017400	PF10545	PF00505	PF00249	0.00399986	0.00427254	0.983769
Glyma.16G017400.15	Glyma.16G017400	PF10545	PF00505	PF00249	0.00399986	0.00427254	0.983769
Glyma.16G017400.10	Glyma.16G017400	PF10545	PF00505	PF00249	0.00399986	0.00427254	0.983769
Glyma.16G017400.1	Glyma.16G017400	PF10545	PF00505	PF00249	0.00399986	0.00427254	0.983769
Glyma.16G017400.9	Glyma.16G017400	PF10545	PF00505	PF00249	0.00399986	0.00427254	0.983769
Glyma.16G017400.8	Glyma.16G017400	PF10545	PF00505	PF00249	0.00399986	0.00427253	0.983769
Glyma.16G017400.5	Glyma.16G017400	PF07557	PF03941	PF00505	0.0583483	0.062933	0.0754302
Glyma.16G017400.21	Glyma.16G017400	PF05678	PF02845	PF07145	0.07021	0.130664	0.161925
Glyma.16G205000.3	Glyma.16G205000	PF00082	PF00291	PF00107	0.0556416	0.143648	0.395252
Glyma.16G038900.4	Glyma.16G038900	PF12894	PF12931	PF08662	0.200239	0.201421	0.245556
Glyma.16G038900.2	Glyma.16G038900	PF12894	PF12931	PF08662	0.200239	0.201421	0.245556
Glyma.16G038900.1	Glyma.16G038900	PF12894	PF12931	PF08662	0.200239	0.201421	0.245556
Glyma.16G038900.5	Glyma.16G038900	PF12894	PF12931	PF08662	0.200239	0.201421	0.245556
Glyma.16G038900.6	Glyma.16G038900	PF12931	PF12894	PF08662	0.194827	0.198204	0.241409
Glyma.16G038900.7	Glyma.16G038900	PF12931	PF12894	PF08662	0.181737	0.202139	0.255286
Glyma.16G028200.1	Glyma.16G028200	PF00059	PF00754	PF00024	0.154509	0.16417	0.177748
Glyma.16G194500.1	Glyma.16G194500	PF00011	PF01556	PF13180	0.0809755	0.189032	0.221874
Glyma.16G073700.1	Glyma.16G073700	PF02453	PF07885	PF03798	0.135288	0.160156	0.389187
Glyma.16G141100.1	Glyma.16G141100	PF02892	PF12756	PF12171	0.0514317	0.0898696	0.775018
Glyma.16G090600.1	Glyma.16G090600	PF00505	PF04419	PF05627	0.0342529	0.0516013	0.256558
Glyma.16G114800.5	Glyma.16G114800	PF00855	PF11926	PF00011	0.00769581	0.00950923	0.943145
Glyma.16G114800.8	Glyma.16G114800	PF09405	PF00855	PF00011	0.00545959	0.00982592	0.95649
Glyma.16G114800.2	Glyma.16G114800	PF09405	PF00855	PF00011	0.00545959	0.00982592	0.95649
Glyma.16G114800.3	Glyma.16G114800	PF09405	PF00855	PF00011	0.00545959	0.00982592	0.95649
Glyma.16G114800.6	Glyma.16G114800	PF09405	PF00855	PF00011	0.00545959	0.00982592	0.95649
Glyma.16G013400.1	Glyma.16G013400	PF00168	PF02721	PF00089	0.0474834	0.0501377	0.0516699
Glyma.16G047950.1	Glyma.16G047950	PF07885	PF00141	PF01105	0.0272578	0.029647	0.0512888
Glyma.16G132100.7	Glyma.16G132100	PF04438	PF01753	PF00098	0.0964174	0.178636	0.294162
Glyma.16G132100.2	Glyma.16G132100	PF04438	PF01753	PF00098	0.08778	0.161785	0.328738
Glyma.16G173900.2	Glyma.16G173900	PF12937	PF00651	PF00646	0.0766225	0.0798977	0.231113
Glyma.16G190867.1	Glyma.16G190867	PF08387	PF12937	PF00646	0.133696	0.176013	0.286567
Glyma.16G084900.2	Glyma.16G084900	PF03719	PF01248	PF00252	0.0670137	0.143604	0.153174
Glyma.16G084900.1	Glyma.16G084900	PF00252	PF00327	PF03939	0.112327	0.115168	0.216862
Glyma.16G205600.1	Glyma.16G205600	PF07883	PF00190	PF05899	0.0102776	0.0130084	0.976107
Glyma.16G171950.1	Glyma.16G171950	PF00024	PF05617	PF00188	0.061861	0.0938099	0.114303
Glyma.16G171950.2	Glyma.16G171950	PF01775	PF00505	PF10545	0.0674944	0.0736913	0.0815684
Glyma.16G181850.1	Glyma.16G181850	PF13966	PF17032	PF07884	0.0438068	0.0895917	0.118857
Glyma.16G069100.1	Glyma.16G069100	PF04003	PF00651	PF00646	0.0871801	0.11666	0.184383
Glyma.16G069100.2	Glyma.16G069100	PF04003	PF00651	PF00646	0.0862216	0.128128	0.16361
Glyma.16G051600.1	Glyma.16G051600	PF02845	PF08492	PF07524	0.0870983	0.117598	0.139056
Glyma.16G051600.4	Glyma.16G051600	PF02845	PF08492	PF07524	0.0845562	0.137199	0.142877
Glyma.16G051600.2	Glyma.16G051600	PF02845	PF08492	PF07524	0.081634	0.132466	0.141047
Glyma.16G164600.1	Glyma.16G164600	PF14368	PF00234	PF04043	0.036424	0.170769	0.757064
Glyma.16G052000.1	Glyma.16G052000	PF00224	PF00271	PF00004	0.0595605	0.0771294	0.103093
Glyma.16G052000.3	Glyma.16G052000	PF13460	PF03446	PF01408	0.0714551	0.0792068	0.0903353
Glyma.16G083400.3	Glyma.16G083400	PF00249	PF10545	PF00505	0.0495257	0.237788	0.608769
Glyma.16G083400.4	Glyma.16G083400	PF08573	PF10545	PF00505	0.0967285	0.258314	0.383955
Glyma.16G083400.5	Glyma.16G083400	PF08573	PF10545	PF00505	0.112929	0.192381	0.320229
Glyma.16G163400.1	Glyma.16G163400	PF07774	PF02469	PF00704	0.055404	0.0573724	0.127996
Glyma.16G214500.1	Glyma.16G214500	PF08423	PF00271	PF02223	0.0606416	0.10298	0.106241
Glyma.16G158200.2	Glyma.16G158200	PF01699	PF01061	PF06813	0.00858485	0.0506986	0.883532
Glyma.16G158200.1	Glyma.16G158200	PF01699	PF01061	PF06813	0.00858485	0.0506986	0.883532
Glyma.16G011300.2	Glyma.16G011300	PF00294	PF00107	PF01592	0.044738	0.0477074	0.1285
Glyma.16G135500.1	Glyma.16G135500	PF00004	PF17874	PF00931	0.00997359	0.0202623	0.957924
Glyma.16G135500.2	Glyma.16G135500	PF00004	PF17874	PF00931	0.00931088	0.0197622	0.958113
Glyma.16G084800.1	Glyma.16G084800	PF16740	PF02854	PF01466	0.06358	0.0912836	0.172419
Glyma.16G045000.1	Glyma.16G045000	PF08031	PF03016	PF00182	0.0980188	0.103664	0.112322
Glyma.16G139500.1	Glyma.16G139500	PF03358	PF00697	PF03446	0.107596	0.122519	0.145367
Glyma.16G221400.1	Glyma.16G221400	PF02221	PF03168	PF12819	0.111279	0.131931	0.135358
Glyma.16G023100.1	Glyma.16G023100	PF01852	PF01243	PF12766	0.0093131	0.011485	0.819973
Glyma.16G120900.1	Glyma.16G120900	PF07883	PF00190	PF09348	0.000887133	0.00209786	0.988611
Glyma.16G120900.2	Glyma.16G120900	PF01823	PF01167	PF09348	0.0836529	0.0981107	0.177214
Glyma.16G120900.3	Glyma.16G120900	PF00622	PF02893	PF09348	0.0518224	0.0744684	0.267099
Glyma.16G060700.1	Glyma.16G060700	PF09430	PF07883	PF00190	0.000199375	0.058648	0.94053
Glyma.16G008001.1	Glyma.16G008001	PF00059	PF13456	PF00646	0.0394817	0.0415672	0.0866494
Glyma.16G049600.1	Glyma.16G049600	PF03914	PF04821	PF02854	0.0507235	0.0587053	0.645908
Glyma.16G049600.2	Glyma.16G049600	PF03914	PF00307	PF02854	0.0492862	0.0562815	0.530075
Glyma.16G073400.1	Glyma.16G073400	PF07647	PF00069	PF00249	0.097708	0.159525	0.408589
Glyma.16G113500.1	Glyma.16G113500	PF13456	PF05699	PF00135	0.0188523	0.0208583	0.0214716
Glyma.16G039800.1	Glyma.16G039800	PF00635	PF04641	PF07839	0.0844863	0.106078	0.189451
Glyma.16G039800.2	Glyma.16G039800	PF02037	PF07839	PF08766	0.0448813	0.0460631	0.688914
Glyma.16G086800.1	Glyma.16G086800	PF03171	PF00011	PF00168	0.0424221	0.0639835	0.11473
Glyma.16G008600.2	Glyma.16G008600	PF01553	PF00346	PF01852	0.063624	0.0781347	0.149036
Glyma.16G008600.1	Glyma.16G008600	PF00497	PF04413	PF01852	0.0673078	0.0880735	0.131261
Glyma.16G212300.1	Glyma.16G212300	PF00004	PF17874	PF00931	0.014152	0.027995	0.941046
Glyma.16G212300.2	Glyma.16G212300	PF00646	PF17874	PF00931	0.00485277	0.00592928	0.980233
Glyma.16G022600.1	Glyma.16G022600	PF00249	PF07714	PF00069	1.05371e-05	0.0111447	0.988817
Glyma.16G022600.5	Glyma.16G022600	PF00249	PF07714	PF00069	1.09346e-05	0.0113437	0.988615
Glyma.16G022600.6	Glyma.16G022600	PF00010	PF07714	PF00069	1.4543e-05	0.0154071	0.984554
Glyma.16G022600.4	Glyma.16G022600	PF00010	PF07714	PF00069	1.57549e-05	0.0152498	0.984704
Glyma.16G022600.3	Glyma.16G022600	PF00010	PF07714	PF00069	1.41793e-05	0.0157164	0.98424
Glyma.16G022600.2	Glyma.16G022600	PF00010	PF07714	PF00069	1.28732e-05	0.0160109	0.983948
Glyma.16G004100.1	Glyma.16G004100	PF00892	PF03798	PF00361	0.0545368	0.124603	0.137061
Glyma.16G171632.1	Glyma.16G171632	PF00931	PF12937	PF00646	0.0792495	0.138208	0.50598
Glyma.16G058100.1	Glyma.16G058100	PF04083	PF12697	PF00561	0.0245251	0.167065	0.771905
[truncated: 87,017 more rows]
