# Supplementary material for: Functional annotation of proteins for signaling network inference in non-model species
Source: Research Square preprint supplement (doi:10.21203/rs.3.rs-2201240/v1), 2022-11-11
Supplement: Supplementary file 2 [file 5fc37cec6194b4f7870f9d0e.xlsx]

## Sheet: Full Table-2022-06-29
Supplementary Table S7 - Output table upon analysis with NetPhorce. Label-free phosphoproteome data from soybean var. Altona was collected every 6 minutes for 1 hours upon cold and control treatment. This data was analyzed using NetPhorce, which performs data quality controls and statistical analysis (see methods for more information).
Protein	AA	multiplicity	condition	set	0min	12min	18min	24min	30min	36min	42min	48min	54min	60min	6min	p.value	qvalue	0min_1	0min_2	0min_3	0min_4	12min_1	12min_2	12min_3	12min_4	18min_1	18min_2	18min_3	18min_4	24min_1	24min_2	24min_3	24min_4	30min_1	30min_2	30min_3	30min_4	36min_1	36min_2	36min_3	36min_4	42min_1	42min_2	42min_3	42min_4	48min_1	48min_2	48min_3	48min_4
Glyma.01G008500.1	S18	1	Cold	StatsSet	26.5323	26.5969	26.5007	26.4515	26.7072	26.558	27.094	27.1522	26.9683	26.3248	26.2132	6.28e-05	2.51e-05	25.3895	26.2312	27.9761	0	25.9594	26.4003	27.431	0	25.7969	25.7128	27.9925	0	25.5358	25.7348	28.0839	0	26.1779	25.9329	28.0107	0	25.5872	26.0125	28.0745	0	26.9975	26.3041	27.9802	0	26.9106	26.6618	27.8841	0
Glyma.01G008500.1	S18	1	Control	StatsSet	27.3167	27.1638	27.084	27.8145	26.9598	27.5409	27.0387	27.5801	27.8447	26.8128	27.0286	6.28e-05	2.51e-05	27.9788	26.2333	27.7381	0	27.1706	26.3191	28.0017	0	27.4222	25.7698	28.06	0	27.3298	27.8306	28.2831	0	27.107	25.6204	28.1519	0	27.4052	27.2948	27.9226	0	27.023	26.057	28.0361	0	27.634	27.0112	28.0951	0
Glyma.01G015500.1	S257	1	Cold	StatsSet	28.9403	28.8598	29.1048	28.6212	28.9924	28.7749	28.6953	28.5424	28.7869	28.678	28.8661	0.000633877	0.000211931	28.9697	29.1466	29.2266	28.4183	28.8424	29.0335	28.7034	0	29.0588	29.4479	0	28.8077	28.6247	28.799	28.44	0	29.4017	28.7479	29.0404	28.7796	28.5526	28.9032	29.26	28.3836	28.2447	28.9394	29.0956	28.5017	28.0027	28.882	28.9035	28.3812
Glyma.01G015500.1	S257	1	Control	StatsSet	29.1472	29.0862	29.3274	29.2748	28.9329	28.9618	28.9263	28.9792	28.8869	28.9634	29.0218	0.000633877	0.000211931	29.4136	28.8574	29.3282	28.9896	29.1699	28.7668	29.1345	29.2738	29.1868	28.8677	29.4454	29.8096	29.4822	29.183	29.2426	29.1915	29.2942	28.8288	28.6756	28.9331	29.1798	29.1286	28.8712	28.6678	29.2363	28.8581	29.0083	28.6023	29.2799	28.9986	29.2159	28.4225
Glyma.01G016500.1	S641	1	Cold	StatsSet	23.3924	22.7356	22.6295	23.1706	22.9122	23.1319	23.2391	23.3519	22.9285	22.3516	22.9034	0.061217	0.015089	23.165	23.5262	23.5766	23.3018	22.3825	22.6646	22.7014	23.194	21.2581	22.9754	22.9178	23.3667	23.209	23.292	22.8957	23.2856	22.654	22.7298	23.2098	23.0551	22.8285	22.9778	23.2102	23.511	22.5902	23.2563	23.4568	23.6532	23.1823	23.0305	23.2806	23.9143
Glyma.01G016500.1	S641	1	Control	StatsSet	23.3707	22.9772	23.1007	23.0185	23.169	23.5141	23.0431	23.3258	23.1285	23.5239	22.8392	0.061217	0.015089	23.309	23.6284	23.079	23.4664	23.2788	23.0652	22.7833	22.7816	22.9008	23.1714	22.9286	23.4022	22.5526	23.2575	23.2233	23.0407	23.1701	22.4988	23.7938	23.2135	23.5123	23.2922	23.4944	23.7574	22.8831	22.6783	23.1621	23.4489	23.1847	22.7905	23.4109	23.9173
Glyma.01G019200.1	T61	1	Cold	UniqueSet	0	0	0	0	0	0	0	0	0	0	0	NA	NA	0	0	0	0	0	0	0	0	0	0	0	0	0	0	0	0	21.9983	0	0	0	0	0	0	0	0	0	0	0	0	0	0	0
Glyma.01G019200.1	T61	1	Control	UniqueSet	0	0	21.5852	0	0	0	21.9831	0	0	23.3282	0	NA	NA	0	0	0	0	0	21.6824	0	0	23.1347	21.973	0	19.648	0	0	0	0	0	0	0	21.5989	0	0	0	0	21.9681	22.4571	0	21.5242	0	23.0717	0	0
Glyma.01G036700.1	S182	1	Cold	StatsSet	23.6022	24.0009	23.8894	23.0913	24.1594	24.2032	23.9394	23.8511	24.5813	25.3264	23.5619	9.05e-11	1.15e-10	23.528	22.7909	24.0044	24.0855	25.1944	23.759	23.519	23.531	24.9025	23.4217	23.6922	23.541	24.5961	23.3203	20.6992	23.7495	24.6598	23.8176	0	24.0007	24.3981	23.754	0	24.4575	24.6438	24.0038	23.8697	23.2405	25.5926	24.0846	22.9257	22.8016
Glyma.01G036700.1	S182	1	Control	StatsSet	24.9968	24.9839	24.845	25.4387	24.7226	25.4118	25.0833	25.1565	25.2596	24.5758	25.3012	9.05e-11	1.15e-10	26.3643	24.1613	24.6563	24.8052	25.3789	24.4166	24.767	25.3731	25.6113	23.8824	24.2503	25.6361	26.0944	25.0204	25.0816	25.5584	26.0558	23.7197	23.6295	25.4854	25.8972	25.1623	25.0357	25.5519	25.947	24.3615	24.465	25.5595	25.9825	24.7183	24.2875	25.6376
Glyma.01G062100.1	S61	1	Cold	StatsSet	26.288	26.2129	26.1921	25.8203	26.0319	25.9642	25.8594	25.5805	25.6215	25.7015	26.1741	0.980124	0.183873	25.7468	26.184	26.8832	26.338	25.8337	26.4185	25.9937	26.6056	25.6481	26.3946	25.9385	26.7871	25.1376	26.0192	25.6658	26.4585	26.0031	26.0409	26.032	26.0517	25.4524	26.1855	26.0379	26.181	25.3758	25.9333	26.0591	26.0694	24.7517	25.8372	25.9012	25.8318
Glyma.01G062100.1	S61	1	Control	StatsSet	26.1845	26.1013	26.1658	26.0665	25.7362	25.6938	25.9803	25.8449	25.4582	25.8682	26.3726	0.980124	0.183873	25.6526	26.2703	26.7994	26.0155	25.5385	26.119	26.5214	26.2264	25.7532	26.0997	26.3606	26.4496	25.8202	26.1722	26.1212	26.1525	25.7361	26.2018	25.6045	25.4022	25.3913	25.9736	25.5983	25.8121	25.6431	26.1818	26.4726	25.6238	25.6977	25.8245	26.1811	25.6762
Glyma.01G087900.1	S556	1	Cold	StatsSet	23.8643	23.9284	23.9048	23.8997	23.1865	23.5688	23.6437	23.5569	23.4114	23.6604	24.0685	0.0424593	0.010902	23.4295	23.5766	24.6024	23.8487	23.7589	24.1925	23.9177	23.8444	23.7356	23.961	24.0179	0	23.5248	24.2089	24.0988	23.7664	23.1384	24.1446	21.6702	23.7928	22.9111	24.3908	23.6	23.3735	22.6016	24.8081	23.9841	23.181	23.5524	23.8364	23.603	23.2358
Glyma.01G087900.1	S556	1	Control	StatsSet	24.0812	23.6182	24.3158	23.6634	23.304	23.0891	23.4386	23.0613	22.7765	22.389	24.1668	0.0424593	0.010902	23.8809	24.9987	24.2709	23.1741	23.5171	24.4284	24.0022	22.5252	24.3181	25.138	23.4913	0	22.7864	24.4602	23.7437	0	22.9109	23.9862	23.7682	22.5505	23.9652	22.6662	23.3849	22.3399	23.6647	22.5806	23.8262	23.683	23.4927	23.6485	22.3453	22.7584
Glyma.01G089300.1	S512	1	Cold	UniqueSet	26.1859	25.1918	24.9129	25.1361	25.2813	0	25.4577	25.3517	24.1441	25.2892	26.3152	NA	NA	24.7084	26.0502	26.9797	27.0055	23.0749	25.8934	0	26.6072	22.0311	25.6708	25.5374	26.4125	23.324	25.7943	0	26.2901	23.1925	26.3916	0	26.2599	0	25.8982	0	0	23.5692	25.8027	26.2001	26.2587	24.0966	25.3696	25.6205	26.3202
Glyma.01G089300.1	S512	1	Control	UniqueSet	24.9119	23.671	24.8134	23.5933	23.7417	24.4456	25.2076	24.707	24.7863	23.9247	24.8551	NA	NA	23.5836	25.5353	25.9043	24.6246	23.7634	25.4643	25.5063	19.95	25.1948	25.1697	25.1823	23.7069	23.0057	25.7611	25.2104	20.3958	22.648	24.0675	23.9911	24.2603	24.1548	23.9712	25.2107	0	24.2577	24.6752	26.154	25.7435	23.9076	24.9622	24.9947	24.9635
Glyma.01G115900.1	T111	1	Cold	StatsSet	26.9632	27.6287	24.6021	27.2625	28.2997	25.876	25.7723	25.4019	27.786	27.4472	27.579	0.25535	0.0554519	26.7794	26.2075	27.5901	27.2759	28.0492	27.2929	28.0728	27.1	20.0767	22.5256	28.0432	27.7631	27.5379	26.3406	28.303	26.8685	28.4334	0	28.5413	27.9244	21.2353	26.5583	28.1552	27.5553	28.5204	19.3976	28.5134	26.6576	21.6798	26.6215	27.2438	26.0625
Glyma.01G115900.1	T111	1	Control	StatsSet	25.9499	27.497	27.7672	27.2589	27.4493	26.1374	27.7471	26.4208	27.3531	27.6932	28.0564	0.25535	0.0554519	28.1458	20.6013	28.0253	27.0273	27.271	28.2387	27.6432	26.8353	27.3457	27.5754	27.8786	28.2692	28.2663	26.5786	27.6621	26.5285	28.1254	27.426	26.9667	27.2789	27.9903	21.7219	27.9537	26.8838	27.9077	27.7546	28.1122	27.2137	28.1763	27.2596	23.1522	27.095
Glyma.01G115900.1	T113	1	Cold	StatsSet	26.859	27.805	28.1211	27.3938	28.1367	27.6119	28.578	27.4463	28.1463	27.9623	27.775	0.0646838	0.015828	26.7794	26.2075	27.5901	0	28.0492	27.2929	28.0728	0	28.5169	27.8033	28.0432	0	27.5379	26.3406	28.303	0	28.4334	27.4353	28.5413	0	28.1221	26.5583	28.1552	0	28.5204	28.7002	28.5134	0	28.4734	26.6215	27.2438	0
Glyma.01G115900.1	T113	1	Control	StatsSet	27.6654	27.7176	27.5999	23.2476	27.4571	27.9575	27.9248	27.8146	27.3592	27.7707	28.1602	0.0646838	0.015828	28.1458	26.825	28.0253	0	27.271	28.2387	27.6432	0	27.3457	27.5754	27.8786	0	19.5153	22.5653	27.6621	0	28.1254	27.2793	26.9667	0	27.9903	27.9284	27.9537	0	27.9077	27.7546	28.1122	0	28.1763	27.2596	28.0078	0
Glyma.01G121400.1	S382	1	Cold	StatsSet	24.8163	23.6365	24.7239	24.5786	24.6216	24.7708	24.7616	23.7992	24.7325	25.0522	24.4158	0.55817	0.113545	24.5913	24.6003	24.9254	25.1484	24.2282	24.6537	24.688	20.9762	24.8269	24.9514	24.5505	24.5665	24.3542	25.0558	24.354	24.5505	24.1912	24.7708	24.6592	24.8651	24.2287	25.0934	24.6043	25.1569	23.9907	25.2973	24.9266	24.8316	24.469	25.0442	24.6713	21.0124
Glyma.01G121400.1	S382	1	Control	StatsSet	24.8134	24.7192	24.7318	24.509	24.3712	24.6516	24.4742	24.5037	24.5645	24.622	24.7034	0.55817	0.113545	24.5465	25.2149	24.7177	24.7745	24.6582	24.5729	24.9482	24.6974	24.6411	24.6159	24.6727	24.9976	23.9461	24.8854	24.6091	24.5957	24.1407	24.353	24.4561	24.5348	24.187	24.7155	24.8964	24.8075	23.9857	24.3704	24.6917	24.8489	24.2391	24.5425	24.36	24.8731
Glyma.01G205400.1	S84	1	Cold	StatsSet	28.462	28.2861	28.4541	28.2797	28.2576	28.1816	27.9893	27.9048	27.5976	28.0304	28.3651	0.33945	0.0711968	28.7713	28.2868	28.3279	0	28.954	28.0327	27.8717	0	29.0179	28.6107	27.7336	0	28.3081	28.8176	27.7134	0	28.5031	28.3538	27.9159	0	27.7755	28.858	27.9114	0	27.7272	28.4703	27.7703	0	27.5327	28.7039	27.4778	0
Glyma.01G205400.1	S84	1	Control	StatsSet	28.6484	28.2335	28.3956	28.5752	28.4199	28.1048	27.9284	28.332	27.8854	28.1138	28.2559	0.33945	0.0711968	29.0131	29.2935	27.6386	0	28.3563	28.2483	28.0958	0	28.5976	28.9155	27.6735	0	28.4295	29.2783	28.0179	0	29.0532	28.0724	28.1341	0	28.4296	28.1406	27.7441	0	28.1145	27.8921	27.7785	0	28.4705	29.081	27.4444	0
Glyma.01G209200.1	S1368	1	Cold	StatsSet	25.585	24.7992	25.2269	25.0798	24.9239	25.0458	24.5129	24.5419	25.0552	24.4511	25.3449	0.00106837	0.000341964	25.167	26.2145	25.3734	0	23.8692	25.1504	25.3781	0	24.6432	25.4807	25.5567	0	24.386	25.3966	25.4567	0	24.648	25.1733	24.9504	0	24.1947	25.3051	25.6377	0	24.1081	24.8656	24.565	0	23.8738	24.8392	24.9128	0
Glyma.01G209200.1	S1368	1	Control	StatsSet	25.0172	24.9503	24.7775	24.2716	24.5626	24.4162	24.5387	24.4419	24.4474	24.6285	24.6907	0.00106837	0.000341964	24.7377	25.1313	25.1826	0	24.6479	24.6349	25.5681	0	24.4415	24.7603	25.1307	0	24.3001	24.3969	24.1178	0	24.5166	24.6418	24.5294	0	23.9905	24.2972	24.961	0	24.6443	24.385	24.5868	0	24.3566	24.3439	24.625	0
Glyma.01G214700.1	S233	1	Cold	StatsSet	25.9856	25.8746	26.0189	26.1462	26.255	26.0234	26.0425	26.1843	26.0878	25.5793	26.0813	1.48e-05	6.67e-06	26.8536	26.6157	24.7437	25.7296	27.2208	26.5884	23.8648	25.8244	26.929	26.4639	24.6533	26.0295	26.9893	26.719	24.7467	26.13	27.2338	26.5873	24.6734	26.5254	26.7943	26.4952	24.6364	26.168	26.7421	26.679	24.7064	0	26.9021	27.0517	24.599	0
Glyma.01G214700.1	S233	1	Control	StatsSet	26.1522	26.5166	26.5675	26.4268	26.6734	26.3152	26.4831	26.4183	26.4506	26.5271	26.2756	1.48e-05	6.67e-06	26.7739	26.6083	24.4104	26.816	26.8595	26.9655	25.2896	26.9517	26.7259	26.1834	25.893	27.4679	27.1037	26.5793	25.2181	26.806	27.0253	27.2095	25.1098	27.3489	26.8364	27.1469	24.3046	26.9726	27.1703	26.9159	25.1293	26.7169	26.9755	26.8683	25.1061	26.7234
Glyma.01G230700.1	S12	1	Cold	StatsSet	24.2784	24.3943	24.5396	24.3104	24.4864	24.2289	24.407	24.2631	24.2405	24.4474	24.3316	7.25e-05	2.8e-05	24.4821	23.1939	25.1591	0	24.9939	23.9152	24.2738	0	24.9025	24.0269	24.6894	0	24.4033	23.7564	24.7715	0	24.5481	23.941	24.97	0	24.2936	23.7633	24.63	0	24.5189	23.8926	24.8094	0	23.9993	23.9722	24.8179	0
Glyma.01G230700.1	S12	1	Control	StatsSet	24.6345	24.7577	24.9851	24.9178	24.9851	24.5876	24.9121	24.583	24.4684	24.6491	24.7375	7.25e-05	2.8e-05	24.7143	24.3421	24.8469	0	24.8709	24.4043	24.998	0	24.6528	24.585	25.7174	0	25.2287	24.6427	24.882	0	25.2059	25.0941	24.6554	0	24.4635	24.6653	24.6339	0	24.6221	25.0756	25.0387	0	24.7536	24.495	24.5006	0
Glyma.01G232600.1	T196	1	Cold	StatsSet	24.0021	24.227	23.6942	24.2132	24.0507	24.097	24.0284	23.9609	24.2181	22.7788	24.1715	0.91157	0.172934	23.7338	24.4392	23.8332	0	24.2068	23.9646	24.5097	0	22.0946	24.0913	24.3835	24.2073	23.7126	24.2197	24.7073	0	23.6635	24.3373	24.2294	23.9725	23.9253	24.0519	24.2952	24.1154	23.9788	24.0933	24.013	0	23.6955	24.1976	23.9897	0
Glyma.01G232600.1	T196	1	Control	StatsSet	24.0104	23.8828	24.1826	23.688	23.962	23.8573	24.0555	23.8785	23.7264	24.0621	23.791	0.91157	0.172934	23.6146	24.2071	24.1648	24.0552	23.8622	23.9932	23.8068	23.8691	24.3667	24.1181	24.3987	23.8471	23.6848	24.0721	23.7381	23.2568	23.7698	24.2665	23.7433	24.0684	23.8874	23.9654	23.6834	23.893	23.8695	24.283	24.2032	23.8665	23.5478	24.501	23.7936	23.6716
Glyma.02G000200.1	T439	1	Cold	StatsSet	26.0606	25.8971	26.045	26.0682	26.8716	25.9153	26.3552	26.0609	26.3864	25.846	26.2526	2.24e-18	1.68e-17	25.0109	26.9546	26.3421	25.9348	23.9464	26.4476	26.7559	26.4386	24.7315	26.4766	26.2569	26.7149	24.5239	26.7622	26.0753	26.9113	26.2367	26.9441	27.8383	26.4675	24.3174	26.5775	26.7547	26.0116	25.4439	25.9758	26.7797	27.2212	24.5421	26.0106	26.7117	26.979
Glyma.02G000200.1	T439	1	Control	StatsSet	24.2629	24.7883	24.5332	24.4232	24.3482	24.7482	24.5528	24.2926	25.0174	24.9904	24.1063	2.24e-18	1.68e-17	22.4336	25.1941	25.3653	24.0588	24.5325	24.7879	25.4306	24.4021	23.9135	24.8372	24.9318	24.4502	24.1737	24.1413	24.992	24.3858	24.0886	24.5215	23.9724	24.8105	24.5644	24.5792	25.3513	24.498	24.3518	25.3494	24.1288	24.3811	21.4802	24.8041	25.6401	25.246
Glyma.02G000400.1	S619	1	Cold	StatsSet	23.4696	23.2932	23.0615	23.6729	23.4037	23.4656	23.9203	24.0733	23.9923	24.2145	23.2866	0.328609	0.0697395	21.5488	23.4785	24.495	24.3562	21.3125	23.942	23.525	24.3933	21.3387	23.1319	24.7139	0	21.6391	23.7356	24.8192	24.4976	21.9139	24.0607	0	24.2365	21.7487	23.6415	24.5031	23.9692	22.3609	24.1882	25.0789	24.0535	23.0787	23.747	24.8974	24.5703
Glyma.02G000400.1	S619	1	Control	StatsSet	23.4121	23.468	23.979	23.9346	23.6217	23.5521	24.4501	23.9318	24.126	23.7334	23.8528	0.328609	0.0697395	23.4244	23.7198	24.0032	22.5011	23.1386	23.6303	24.9486	22.1547	23.7347	24.3103	24.7772	23.0938	22.7358	24.6626	24.4053	0	23.0739	24.2711	24.0143	23.1275	23.8129	22.8594	24.2705	23.2654	24.0805	22.835	26.2307	24.6541	23.8087	24.1503	23.9942	23.774
Glyma.02G022800.1	S302	1	Cold	StatsSet	25.8111	25.2794	25.8011	25.6258	25.5219	25.6918	25.1657	24.78	25.2921	24.9363	26.0762	0.0228359	0.0062188	25.456	26.6374	25.3399	0	24.8463	25.6672	25.3246	0	25.517	26.1268	25.7596	0	25.6287	25.785	25.4637	0	25.8336	25.222	25.5102	0	25.0235	25.7745	26.2774	0	24.3752	25.7308	25.3911	0	23.6412	25.2856	25.4134	0
Glyma.02G022800.1	S302	1	Control	StatsSet	26.1115	26.0841	25.5907	25.438	26.2591	25.3175	25.964	25.6674	25.6389	26.0078	25.5416	0.0228359	0.0062188	26.011	26.0568	26.2666	0	26.0582	26.0022	26.192	0	24.9074	25.6421	26.2228	0	26.3406	24.9219	25.0515	0	26.2033	26.6296	25.9444	0	25.3051	25.2788	25.3685	0	26.2415	26.2563	25.3942	0	25.7875	25.4249	25.7899	0
Glyma.02G039400.1	S394	1	Cold	StatsSet	25.0415	24.8054	24.8829	25.0964	24.7334	24.783	25.0054	24.8076	24.9951	24.5191	24.8617	4.31e-14	1.16e-13	24.1754	25.3525	25.5967	0	23.753	25.4593	25.2039	0	24.1804	25.0348	25.4335	0	23.9544	25.2024	26.1325	0	24.1737	24.8474	25.179	0	23.8072	25.009	25.5328	0	24.4216	25.0014	25.5932	0	24.1435	25.094	25.1854	0
Glyma.02G039400.1	S394	1	Control	StatsSet	23.6367	23.8841	23.7486	23.6662	23.6058	23.6667	24.0437	23.7141	24.045	24.0347	23.8005	4.31e-14	1.16e-13	23.2837	23.7285	23.898	0	23.417	23.7854	24.45	0	22.9009	23.8566	24.4884	0	23.1496	23.8218	24.0271	0	23.1612	23.993	23.6632	0	23.1953	23.8376	23.9673	0	23.4643	23.7594	24.9074	0	23.2319	23.6012	24.3091	0
Glyma.02G044000.1	T156	1	Cold	StatsSet	25.4377	25.5514	25.4659	25.4805	25.4144	25.4884	25.2093	24.9111	25.3945	24.7949	25.7545	0.10848	0.0253508	25.9341	25.1193	25.2597	0	25.9109	25.4773	25.2659	0	26.0256	25.3241	25.0481	0	25.7091	25.2489	25.4835	0	25.5082	25.0593	25.6758	0	25.5204	25.0846	25.8601	0	24.7927	25.5476	25.2874	0	24.3806	25.3597	24.993	0
Glyma.02G044000.1	T156	1	Control	StatsSet	25.2785	25.4049	25.0799	24.6997	25.7044	24.9085	25.0852	25.1391	24.9058	25.3103	25.1332	0.10848	0.0253508	25.4606	25.2089	25.166	0	25.7691	25.7417	24.7038	0	25.2645	25.4826	24.4926	0	25.7826	24.0155	24.3009	0	25.6244	25.8858	25.6029	0	25.3853	24.9514	24.3889	0	25.6012	25.9314	23.7229	0	25.1542	25.2305	25.0325	0
Glyma.02G082800.1	S99	1	Cold	StatsSet	25.3992	24.7009	24.7324	25.625	25.3799	25.4622	24.6345	25.2559	25.538	25.7317	24.9555	3.44e-05	1.45e-05	24.9809	26.1568	25.06	0	23.7218	25.3594	25.0215	0	22.6834	25.9946	25.5191	0	24.4723	26.5325	25.8703	0	24.2137	26.0911	25.8348	0	23.9054	26.4995	25.9818	0	22.5594	25.4321	25.9121	0	24.4273	25.0242	26.3163	0
Glyma.02G082800.1	S99	1	Control	StatsSet	24.2489	24.7304	24.5331	24.4808	24.0446	25.0312	24.7933	23.9343	24.7787	25.1956	24.4174	3.44e-05	1.45e-05	21.7052	25.5515	25.4898	0	23.8775	24.7302	25.5835	0	23.7229	25.079	24.7975	0	22.9283	25.7797	24.7343	0	23.4064	24.4108	24.3165	0	24.5811	24.9545	25.5582	0	23.8297	24.9017	25.6485	0	21.9705	25.132	24.7004	0
Glyma.02G101800.1	S916	1	Cold	StatsSet	23.6314	24.0969	23.5702	24.016	23.5541	23.7539	23.6352	23.6786	23.6461	23.2197	23.854	0.00049361	0.000169222	23.5546	24.1814	23.412	23.3776	0	24.9269	24.5794	22.7846	0	23.9757	23.7835	22.9514	23.4746	24.2199	24.4206	23.9487	23.39	23.8347	23.5455	23.4462	23.6822	24.1573	24.0596	23.1165	23.5594	23.9285	23.5443	23.5087	23.4012	24.2719	23.7272	23.3142
Glyma.02G101800.1	S916	1	Control	StatsSet	23.4639	23.6532	22.5676	23.099	23.1535	23.1407	23.0796	23.2819	23.3027	23.3588	22.9941	0.00049361	0.000169222	22.8755	23.4407	23.5769	23.9624	23.2519	23.3188	23.6044	24.4378	22.5757	23.4464	23.0918	21.1564	22.8556	22.7529	23.0072	23.7805	22.0406	23.7242	23.6958	0	22.2995	23.0244	23.1926	24.0466	23.0552	23.5122	22.6715	0	22.1752	23.239	23.7079	24.0055
Glyma.02G109400.1	S82	1	Cold	StatsSet	24.155	23.3512	23.1633	23.141	23.4006	23.6486	23.646	23.7144	23.7211	23.6612	23.3887	0.145407	0.0332891	23.5173	24.4255	23.7267	24.9503	22.8076	22.8843	23.1576	24.5554	22.1735	23.5385	23.2233	23.7181	22.4604	23.3169	22.7761	24.0106	23.2665	23.3472	0	23.5881	22.7448	23.8102	23.6892	24.3504	23.4004	23.4776	0	24.06	23.4805	23.5901	0	24.0727
Glyma.02G109400.1	S82	1	Control	StatsSet	23.4544	23.7112	23.7022	23.5555	23.6871	23.7989	23.9703	23.5505	23.6549	23.8367	23.8584	0.145407	0.0332891	23.0209	23.7849	23.3949	23.6168	23.5865	23.7301	24.1176	23.4104	0	23.7788	23.6099	23.7179	22.6872	24.4243	23.4028	23.7079	22.7638	23.8558	24.0744	24.0543	23.3144	23.1474	23.8097	24.9242	23.1709	23.721	24.255	24.734	23.1426	23.5319	23.5504	23.977
Glyma.02G115400.1	S393	1	Cold	StatsSet	28.793	28.9162	28.8504	28.8725	28.9384	29.0288	29.2766	29.1533	29.5081	29.2661	28.9605	0.106246	0.0250193	28.6451	28.4839	29.2499	0	29.0607	28.5008	29.1871	0	29.0515	28.2447	29.2551	0	28.5322	28.346	29.7393	0	29.0805	28.8591	28.8756	0	28.9597	28.9566	29.1702	0	29.8182	28.8953	29.1164	0	29.4706	29.4636	28.5258	0
Glyma.02G115400.1	S393	1	Control	StatsSet	29.0097	28.5005	29.0344	28.5141	28.5594	29.0416	29.0269	28.8614	29.146	28.4185	29.5528	0.106246	0.0250193	29.201	29.0772	28.7508	0	28.6217	28.9381	27.9415	0	29.0564	28.7584	29.2883	0	28.725	28.1456	28.6715	0	29.003	28.9872	27.688	0	29.0213	29.3041	28.7994	0	28.495	29.2632	29.3225	0	28.8411	29.3407	28.4024	0
Glyma.02G144400.1	S63	1	Cold	StatsSet	24.7027	24.3195	24.71	24.7466	24.3385	23.596	24.7134	24.4824	24.8401	25.045	24.7377	0.165222	0.0371952	24.8344	24.8973	24.4165	24.6627	23.9532	24.4309	24.2187	24.6751	24.4296	24.6009	24.6992	25.1105	24.1064	24.6983	24.9405	25.2411	24.2429	24.4876	24.2851	0	24.3264	25.0534	24.7432	20.2612	24.601	24.9307	0	24.6087	23.936	25.0909	24.1057	24.797
Glyma.02G144400.1	S63	1	Control	StatsSet	24.7968	24.5953	25.1419	24.6317	24.662	24.6657	24.8026	24.6791	24.6013	24.6913	24.9646	0.165222	0.0371952	24.3369	24.8264	25.0569	24.9668	24.4794	24.626	24.9743	24.3017	24.4795	24.8592	25.5015	25.7271	24.4348	24.6103	24.61	24.8718	24.3291	24.7868	24.6292	24.9028	23.94	25.0706	24.8046	24.8475	24.0325	24.7104	25.4996	24.968	24.3038	25.3302	24.5058	24.5767
Glyma.02G195600.1	S1833	1	Cold	StatsSet	23.044	23.0224	22.8893	22.6999	23.1122	22.7306	22.5028	22.7213	22.7143	22.6674	23.1691	2.07e-11	3.11e-11	24.0224	23.1135	22.5115	22.5285	23.8565	0	22.8419	22.3689	24.4406	0	22.2534	21.9738	23.5457	22.4507	22.447	22.3562	23.4686	22.613	22.8779	23.4892	23.5617	22.208	22.4209	22.7319	22.7058	22.8523	22.1834	22.2695	23.4382	22.5012	22.2244	0
Glyma.02G195600.1	S1833	1	Control	StatsSet	23.9672	23.7747	23.1076	23.4665	23.7337	23.4173	23.4972	23.3341	23.3777	23.5779	23.8185	2.07e-11	3.11e-11	24.6111	23.3014	23.7531	24.2032	24.1126	23.5055	23.5742	23.9063	23.1101	23.1498	23.0628	0	24.5633	22.5723	23.264	0	24.7427	23.2788	23.1132	23.8002	23.7005	23.2594	23.2157	23.4936	24.104	23.2304	22.9362	23.7183	24.4168	22.8211	22.7644	0
Glyma.02G203700.1	S2	1	Cold	StatsSet	26.9341	26.2809	26.9185	26.3719	26.8694	26.7866	26.7796	26.8804	26.5539	27.2587	26.0528	6.33e-07	3.75e-07	26.7915	26.5284	27.4824	0	26.6919	26.0015	26.1493	0	26.9211	27.1841	26.6504	0	26.0195	26.7659	26.3303	0	26.7277	26.9058	26.9748	0	26.0064	27.612	26.7413	0	26.3264	26.7817	27.2308	0	26.5328	27.4737	26.6345	0
Glyma.02G203700.1	S2	1	Control	StatsSet	27.4985	27.0701	27.7427	27.7846	27.1682	27.651	27.5923	27.8116	27.6001	27.6225	27.1372	6.33e-07	3.75e-07	27.4711	28.194	26.8305	0	27.1208	27.424	26.6656	0	28.2987	27.5201	27.4093	0	27.05	28.9865	27.3174	0	28.0579	27.2864	26.1604	0	27.5106	27.8028	27.6397	0	26.8497	27.461	28.4662	0	27.981	28.5107	26.943	0
Glyma.02G220700.1	S235	1	Cold	StatsSet	24.6657	24.5197	24.7987	24.7347	24.7436	24.8963	24.989	24.7821	25.1174	25.0515	24.671	2.26e-07	1.44e-07	24.8748	24.7112	24.3484	24.7284	24.2132	24.1481	25.1296	24.5881	24.7731	24.6293	24.8279	24.9647	24.4549	24.6413	24.9568	24.8856	24.8659	24.8844	24.4382	24.7861	24.6696	24.9286	24.765	25.222	25.1135	24.9783	25.0457	24.8184	24.8263	24.9061	24.5219	24.8743
Glyma.02G220700.1	S235	1	Control	StatsSet	24.5045	24.3602	24.609	24.5837	24.3294	24.7871	24.6035	24.4669	24.5209	24.5254	24.5785	2.26e-07	1.44e-07	24.6191	24.2026	24.5697	24.6267	24.5542	24.3033	24.2217	24.3616	24.4313	24.4588	24.9981	24.548	24.6791	24.4974	24.4491	24.7089	24.2954	24.3338	23.9264	24.7619	24.8661	24.6999	24.6931	24.8891	24.5788	24.3992	25.1759	24.2602	24.7052	24.5361	24.3423	24.284
Glyma.02G222400.1	T21	1	Cold	StatsSet	24.0891	24.237	23.7425	23.9833	24.1985	23.9726	23.9689	23.8864	23.9726	23.9997	23.3346	2.08e-12	4.12e-12	22.4188	0	23.9409	25.9076	23.233	23.5216	24.0983	26.0953	23.7316	23.6791	23.8169	0	22.7521	23.2002	23.9721	26.0088	23.3789	23.831	24.1403	25.4438	23.0974	22.7778	24.1744	25.8407	22.9129	23.2801	23.9529	25.7295	23.4768	22.6633	23.775	25.6305
Glyma.02G222400.1	T21	1	Control	StatsSet	22.7793	22.7055	22.8251	23.1219	22.8056	22.7331	23.1475	22.6911	23.0381	21.9408	23.098	2.08e-12	4.12e-12	22.3633	22.6079	22.1716	23.9742	21.9699	22.8385	22.3007	23.713	0	21.7637	22.8326	23.8792	22.5644	0	22.6474	24.154	23.0047	23.145	21.2658	23.8071	21.9163	22.3335	22.2925	24.39	22.9484	23.7357	22.18	23.7258	22.499	0	21.9405	23.6338
Glyma.02G228700.1	S265	1	Cold	StatsSet	25.0465	25.1227	24.9585	24.9716	24.9141	24.766	24.5521	24.5228	24.0642	24.9162	25.3306	0.000803242	0.000263341	26.0608	24.8639	24.7764	24.4849	26.0567	25.3159	24.7221	24.3961	26.0637	24.8671	24.442	24.4612	26.0528	24.9549	24.6403	24.2383	25.4889	24.6746	24.9385	24.5544	25.8475	24.5066	24.408	24.3018	24.985	24.7641	24.2638	24.1954	25.4474	24.6455	24.1261	23.8723
Glyma.02G228700.1	S265	1	Control	StatsSet	25.9508	25.6559	25.4286	25.3903	25.3467	24.5961	24.7886	25.0121	24.5477	24.2641	25.6604	0.000803242	0.000263341	26.3833	25.8082	25.4941	26.1178	25.9718	25.4478	25.0534	26.1505	25.2805	25.3121	24.719	26.4029	25.5336	25.3332	24.8424	25.852	25.3677	25.1749	25.7308	25.1133	24.9547	24.3433	24.3419	24.7447	25.0289	24.9243	24.3187	24.8825	25.25	25.0288	24.9777	24.792
Glyma.02G251100.1	S77	1	Cold	StatsSet	27.0355	26.4508	26.4062	25.7878	25.7378	25.5473	25.3963	25.082	25.1174	25.2938	27.0278	0.00669904	0.00198675	27.0611	27.4278	27.2047	26.4484	26.7438	26.4699	26.2219	26.3678	26.3676	26.5914	26.2748	26.3908	25.9065	26.0293	25.7166	25.4989	25.7873	25.4437	25.9239	25.7964	25.7826	25.4057	25.8084	25.1924	25.6993	25.0493	25.6805	25.1562	24.8906	25.2779	25.4026	24.7571
Glyma.02G251100.1	S77	1	Control	StatsSet	27.3603	26.4161	26.0968	26.0139	25.8213	25.787	25.6409	25.8622	25.6516	25.3713	26.661	0.00669904	0.00198675	27.9651	27.2891	26.975	27.2119	26.6827	25.9029	26.3891	26.6898	26.0848	25.6586	26.2041	26.4396	25.8057	25.8621	25.8896	26.4982	25.7732	25.5835	25.7562	26.1725	25.5651	25.8756	25.5986	26.1087	25.8072	25.3587	25.7801	25.6178	25.872	25.9013	26.126	25.5495
Glyma.02G295100.1	S573	2	Cold	StatsSet	23.8265	24.7321	24.5985	22.1613	23.5058	24.3988	24.6166	24.3329	23.8776	24.7061	24.436	0.796877	0.15389	23.7536	23.9548	22.4917	25.1058	24.8253	24.6102	24.4161	25.0765	24.2263	24.7906	24.3637	25.0132	23.5615	24.4755	20.0512	20.557	24.0359	24.4446	20.4171	25.1255	24.3073	24.5965	23.9911	24.7002	24.8149	24.5289	0	24.5059	24.5722	24.6823	24.027	24.0503
Glyma.02G295100.1	S573	2	Control	StatsSet	23.8412	24.0061	24.1666	24.0587	24.1666	24.1491	24.4237	24.0269	24.1814	23.9562	24.5253	0.796877	0.15389	23.8893	24.2553	23.7837	23.4364	24.0963	23.9471	24.3003	23.6806	23.8828	23.9147	24.6562	24.2127	24.11	24.402	23.8193	23.9036	24.0571	24.7269	24.1543	23.7283	24.0133	24.1528	24.3736	24.0568	23.9312	24.3545	24.9326	24.4766	24.069	23.9024	24.2034	23.9328
Glyma.02G295100.1	S581	1	Cold	StatsSet	25.5972	25.8935	25.8539	25.3982	25.7083	25.4109	25.4879	25.096	25.1865	25.6285	25.6516	0.0504625	0.0128123	25.2594	25.3539	25.6796	26.0957	26.1272	25.795	25.6534	25.9983	25.9132	26.1174	25.3849	25.9999	25.1921	25.662	25.1846	25.5542	25.5714	25.4462	25.5893	26.2265	25.6332	25.6271	24.8655	25.5176	26.0114	25.5751	25.3538	25.0112	25.5047	25.6143	24.6214	24.6437
Glyma.02G295100.1	S581	1	Control	StatsSet	25.5682	25.6143	25.6913	25.7837	25.7377	25.7814	25.7362	25.4973	25.5371	25.5678	25.8983	0.0504625	0.0128123	25.8132	25.6441	25.1909	25.6246	25.5752	25.3271	25.4257	26.1291	25.6086	25.1786	25.5172	26.4609	25.7685	25.9355	25.2599	26.1711	25.515	26.1046	25.5772	25.7541	25.5503	25.5355	25.7606	26.2791	25.6004	25.5044	25.6429	26.1973	25.6186	25.0967	25.6209	25.6529
Glyma.02G295100.1	S581	2	Cold	StatsSet	24.3206	24.7321	24.5985	24.2158	24.5671	24.3988	24.5946	24.3329	24.3297	24.7061	24.436	2.91e-05	1.24e-05	23.7536	23.9548	24.4682	25.1058	24.8253	24.6102	24.4161	25.0765	24.2263	24.7906	24.3637	25.0132	23.5615	24.4755	24.0974	24.7289	24.0359	24.4446	24.6623	25.1255	24.3073	24.5965	23.9911	24.7002	24.8149	24.5289	24.5288	24.5059	24.5722	24.6823	24.027	24.0503
Glyma.02G295100.1	S581	2	Control	StatsSet	23.8412	24.0061	24.1666	24.0587	24.1666	24.1491	24.4237	24.0269	24.1814	23.9562	24.5253	2.91e-05	1.24e-05	23.8893	24.2553	23.7837	23.4364	24.0963	23.9471	24.3003	23.6806	23.8828	23.9147	24.6562	24.2127	24.11	24.402	23.8193	23.9036	24.0571	24.7269	24.1543	23.7283	24.0133	24.1528	24.3736	24.0568	23.9312	24.3545	24.9326	24.4766	24.069	23.9024	24.2034	23.9328
Glyma.02G311300.1	S590	2	Cold	StatsSet	25.1046	24.9332	25.0898	25.0946	25.1457	24.9593	25.0344	24.9209	24.9175	25.1991	24.7372	0.000753499	0.000248239	24.267	25.6365	25.4103	0	23.5943	25.3815	25.8238	0	23.6023	25.7564	25.9106	0	23.7789	25.9123	25.5925	0	24.1341	25.7639	25.5392	0	23.8479	25.6318	25.3981	0	24.2817	25.2522	25.5693	0	23.8664	25.4046	25.4916	0
Glyma.02G311300.1	S590	2	Control	StatsSet	24.5343	24.4661	25.01	24.4189	24.1917	24.9153	25.0555	24.5377	24.794	25.0117	24.6257	0.000753499	0.000248239	23.5142	24.9829	25.1059	0	23.4882	24.6436	25.2666	0	24.8153	24.7155	25.4991	0	23.5201	24.8044	24.9321	0	23.8861	24.621	24.0679	0	23.742	25.0848	25.919	0	23.8962	25.0771	26.1933	0	23.6308	25.0083	24.974	0
Glyma.02G311300.1	S596	1	Cold	StatsSet	24.8292	24.9309	24.8236	25.1991	24.9636	24.8802	24.9846	24.9631	24.9845	25.375	24.9828	3.51e-05	1.47e-05	24.5209	25.6316	24.3351	0	23.0028	25.586	26.2039	0	23.9691	25.2413	25.2603	0	23.9808	25.4506	26.1659	0	23.8396	25.4907	25.5604	0	23.8235	25.1403	25.6768	0	24.3119	25.3164	25.3256	0	23.8935	25.7141	25.2816	0
Glyma.02G311300.1	S596	1	Control	StatsSet	24.5787	24.5915	24.4689	24.3137	24.0313	24.493	24.6329	24.4425	24.7609	24.6825	24.2306	3.51e-05	1.47e-05	23.9059	24.6096	25.2208	0	23.8169	24.831	25.1267	0	24.6318	23.8022	24.9726	0	23.836	24.2154	24.8896	0	23.3907	24.4472	24.2559	0	23.5096	24.7703	25.1992	0	23.6818	24.9315	25.2853	0	23.3473	24.7956	25.1846	0
Glyma.02G311300.1	S596	2	Cold	StatsSet	25.1046	24.9332	25.0898	25.0946	25.1457	24.9593	25.0344	24.9209	24.9175	25.1991	24.7372	0.000753499	0.000248239	24.267	25.6365	25.4103	0	23.5943	25.3815	25.8238	0	23.6023	25.7564	25.9106	0	23.7789	25.9123	25.5925	0	24.1341	25.7639	25.5392	0	23.8479	25.6318	25.3981	0	24.2817	25.2522	25.5693	0	23.8664	25.4046	25.4916	0
Glyma.02G311300.1	S596	2	Control	StatsSet	24.5343	24.4661	25.01	24.4189	24.1917	24.9153	25.0555	24.5377	24.794	25.0117	24.6257	0.000753499	0.000248239	23.5142	24.9829	25.1059	0	23.4882	24.6436	25.2666	0	24.8153	24.7155	25.4991	0	23.5201	24.8044	24.9321	0	23.8861	24.621	24.0679	0	23.742	25.0848	25.919	0	23.8962	25.0771	26.1933	0	23.6308	25.0083	24.974	0
Glyma.03G004800.1	S201	1	Cold	StatsSet	22.4319	22.3244	22.6144	22.424	22.7628	22.6618	22.4332	22.506	22.5923	22.0881	22.6664	0.0671177	0.0163643	22.9027	22.3952	22.3523	22.0773	22.4223	22.6319	22.7236	21.5198	23.1111	22.6289	22.6453	22.0724	22.7865	22.8177	0	21.6679	22.8386	22.8	22.5726	22.8401	22.7835	22.6081	22.6619	22.5937	22.3234	22.9698	22.628	21.8115	22.8048	22.7792	22.7824	21.6577
Glyma.03G004800.1	S201	1	Control	StatsSet	22.2825	22.4011	22.2198	22.4397	22.5676	22.3905	22.7132	22.4443	22.2566	21.5118	22.0986	0.0671177	0.0163643	22.891	22.4679	21.8406	21.9306	22.6211	22.168	22.2665	22.549	22.0141	22.6003	21.9026	22.362	23.0123	22.0806	22.2262	0	23.032	22.4855	22.4204	22.3323	22.3634	22.4822	22.3983	22.3179	22.6472	22.5837	0	22.9087	22.6187	22.4428	22.1348	22.5809
Glyma.03G032100.1	S144	2	Cold	UniqueSet	0	0	0	0	0	0	0	0	0	0	0	NA	NA	0	0	24.9637	0	0	0	0	0	0	25.0037	0	0	0	0	0	0	0	0	25.5174	0	24.6398	0	0	0	24.8266	0	0	0	24.271	0	0	0
Glyma.03G032100.1	S144	2	Control	UniqueSet	0	0	0	0	0	0	0	0	23.3065	0	0	NA	NA	0	24.7107	0	0	0	0	0	0	0	0	0	0	0	23.8396	0	0	23.8536	0	0	0	0	0	24.8996	0	0	0	25.331	0	23.7021	0	0	0
Glyma.03G068700.1	S13	1	Cold	StatsSet	27.253	27.2526	27.2013	27.1396	27.0175	27.1812	27.1886	27.1825	27.277	27.3718	27.0836	5.81e-20	6.54e-19	26.5459	27.4238	27.2456	27.7966	26.3159	27.0532	27.9259	27.7154	26.2797	27.3623	27.3125	27.8508	26.1358	27.2626	27.4778	27.6822	26.0248	27.6299	27.3945	27.0208	26.4801	27.6658	27.2224	27.3565	26.4255	27.4583	27.1764	27.6942	26.3948	27.9804	26.9286	27.4264
Glyma.03G068700.1	S13	1	Control	StatsSet	26.2314	26.0893	26.4496	26.0349	25.7297	26.1422	26.074	26.112	26.2013	26.2077	26.2005	5.81e-20	6.54e-19	25.7961	26.3611	26.4746	26.2939	25.6798	26.0608	26.652	25.9645	26.2342	26.0903	26.6582	26.8155	25.7067	26.1356	26.0928	26.2043	26.1986	25.8353	24.8545	26.0304	25.6906	26.2654	26.2812	26.3315	25.8102	26.336	26.246	25.9036	26.0097	26.4005	26.0184	26.0197
Glyma.03G102500.1	S270	1	Cold	StatsSet	22.4347	22.4441	22.237	22.3172	22.2518	22.3523	22.2781	22.1365	22.2997	22.1039	22.4451	0.00226799	0.00069624	21.8064	22.6565	22.8413	0	22.3251	22.68	22.3273	0	22.0587	22.1313	22.5211	0	22.3656	22.2218	22.3643	0	22.0595	21.9725	22.7234	0	22.5899	21.9081	22.5589	0	22.1984	21.8902	22.7457	0	22.4208	22.1078	21.8809	0
Glyma.03G102500.1	S270	1	Control	StatsSet	21.4154	22.0293	22.148	21.9066	22.1231	22.2115	22.2657	22.1183	22.3102	22.0449	21.8762	0.00226799	0.00069624	21.8599	20.9666	21.4197	0	22.1637	21.7053	22.219	0	22.1961	22.0412	22.2067	0	21.9105	21.6785	22.1307	0	22.0459	22.3079	22.0154	0	22.8174	21.8782	21.9389	0	22.1946	22.1256	22.477	0	22.1221	21.8013	22.4313	0
Glyma.03G121000.1	S133	1	Cold	StatsSet	25.6219	25.7556	25.8332	25.6708	26.0208	25.9352	25.7552	25.83	25.7945	26.0721	25.5421	0.601183	0.121276	25.3032	25.9274	25.6352	0	25.7414	25.4904	26.0349	0	25.2094	26.2083	26.0818	0	25.2915	25.931	25.79	0	26.0917	26.2956	25.675	0	25.5966	26.2044	26.0046	0	25.3847	25.987	25.8939	0	25.7185	25.8524	25.9192	0
Glyma.03G121000.1	S133	1	Control	StatsSet	26.0413	25.7401	25.9496	25.6317	25.4639	25.8951	26.1753	25.8268	25.7474	26.0337	25.7882	0.601183	0.121276	25.965	26.0169	26.1421	0	25.5756	25.5873	26.0572	0	25.8906	25.4641	26.4941	0	25.8642	25.3438	25.6871	0	26.0646	25.277	25.0501	0	25.7568	26.07	25.8585	0	25.6823	26.1945	26.6491	0	25.8719	25.9379	25.6705	0
Glyma.03G127300.1	S717	1	Cold	UniqueSet	0	0	0	0	0	0	0	0	0	0	0	NA	NA	0	0	0	21.0273	0	0	0	0	20.6289	0	0	0	0	0	0	0	0	0	0	0	0	0	0	0	0	0	0	0	19.4256	0	0	0
Glyma.03G127300.1	S717	1	Control	UniqueSet	0	0	20.2781	21.623	0	0	0	0	21.1457	0	0	NA	NA	0	21.3629	0	0	20.4066	0	0	0	20.4942	20.4167	19.9233	0	20.3633	21.6559	22.8498	0	0	18.0674	0	0	0	0	0	0	0	0	0	19.9992	0	20.598	0	0
Glyma.03G157900.1	S440	1	Cold	StatsSet	22.9559	23.3443	23.1104	22.9879	23.3749	23.353	23.2925	23.2004	23.187	23.6316	23.0556	0.0908231	0.0217514	24.1147	22.2441	23.0973	22.3675	25.1373	23.2174	22.2795	22.743	24.7255	22.4153	22.723	22.578	24.2699	22.6291	22.4475	22.6051	24.8856	22.8073	22.4503	23.3562	24.4816	23.0299	22.5455	23.355	24.669	23.2766	22.5365	22.688	24.0478	23.4249	22.1283	0
Glyma.03G157900.1	S440	1	Control	StatsSet	23.3931	23.1659	23.507	23.882	23.4264	23.5624	23.3942	23.4145	23.402	23.1423	23.7416	0.0908231	0.0217514	24.0439	22.5979	22.5049	24.4255	23.9285	22.8395	21.2723	24.6234	23.7591	23.0879	22.1983	24.9826	24.1466	23.3428	23.2508	24.7879	23.9983	22.6144	22.8634	24.2297	23.9764	23.4197	22.6288	24.2249	23.5954	23.4192	22.5912	23.9711	23.9316	23.3426	22.4916	23.8921
Glyma.03G167100.1	S269	1	Cold	StatsSet	26.1601	26.6452	26.4314	25.8334	26.0323	25.7778	25.5612	25.718	25.9731	25.6383	26.6989	1.16e-22	1.95e-21	26.6548	26.3792	25.8035	25.8028	27.8268	26.8309	26.1257	25.7976	27.5001	26.786	25.914	25.5255	26.6925	25.7668	25.3856	25.489	27.1322	25.7195	25.3231	25.9546	27.1299	25.3333	25.1197	25.5283	26.7817	24.9819	25.5096	24.9718	26.5643	25.4772	25.1125	0
Glyma.03G167100.1	S269	1	Control	StatsSet	27.7264	27.2409	27.354	27.2539	27.3808	27.0297	27.3921	27.1914	27.2381	27.1767	27.4294	1.16e-22	1.95e-21	28.1408	27.9677	27.6001	27.197	27.704	27.0718	27.1738	27.0138	27.496	26.6586	27.6535	27.6079	28.2186	26.5333	26.999	27.2645	28.1077	26.7059	27.3742	27.3355	27.1211	27.2799	26.5058	27.212	28.1908	27.104	27.0915	27.182	27.8786	27.2211	26.7251	26.941
Glyma.03G215200.1	S775	1	Cold	StatsSet	21.4843	21.1226	20.9766	21.3091	21.2359	20.25	21.5328	21.6342	21.7525	21.1478	21.1531	0.000178318	6.47e-05	21.6837	21.6067	21.7301	20.9168	22.1882	21.0598	20.6207	20.6218	21.9161	20.4206	20.8059	20.7637	22.257	20.8713	21.1422	20.9659	22.4749	20.6205	0	20.6121	22.1058	17.5293	0	21.1147	22.3255	20.9311	21.525	21.3494	22.7504	20.8182	21.5685	21.3997
Glyma.03G215200.1	S775	1	Control	StatsSet	21.8614	21.716	21.5806	21.9762	21.9391	21.759	21.6564	21.5833	21.7739	21.4199	21.3992	0.000178318	6.47e-05	22.3859	21.0699	21.6627	22.327	22.1255	21.7007	21.2948	21.7432	0	21.2144	21.1215	22.406	22.2848	21.3344	21.9631	22.3226	21.8256	21.7397	21.8746	22.3166	22.6168	21.284	21.1775	21.9578	21.9966	21.4247	21.1919	22.0126	21.895	21.0485	21.3355	22.0542
Glyma.03G259500.1	S47	2	Cold	UniqueSet	0	0	0	0	0	0	0	0	0	0	0	NA	NA	24.5406	0	0	0	24.5191	0	0	0	0	0	0	0	0	0	0	0	0	0	0	0	0	0	0	0	0	0	0	0	0	0	0	0
Glyma.03G259500.1	S47	2	Control	UniqueSet	0	23.5089	0	0	0	0	0	0	0	0	0	NA	NA	0	0	0	0	23.7462	23.3657	23.4147	0	0	0	0	0	0	0	0	0	0	0	0	0	0	0	0	0	23.4666	0	0	0	23.228	0	0	0
Glyma.03G264600.1	T434	1	Cold	StatsSet	24.1074	23.8836	23.8677	24.1477	24.043	24.4884	24.5079	24.8181	24.7566	24.4748	23.8575	5.82e-06	2.89e-06	23.3893	24.5521	24.2119	24.2762	22.8166	23.8923	24.5303	24.2951	23.2455	23.9662	23.6708	24.5883	22.7754	24.4446	24.6487	24.7224	23.1773	24.1721	24.3017	24.5209	23.4315	25.232	24.4715	24.8186	23.6421	24.8646	24.4448	25.0802	23.9977	25.6027	24.6166	25.0552
Glyma.03G264600.1	T434	1	Control	StatsSet	23.4423	23.7233	24.1715	23.8727	23.8786	24.1111	24.1032	23.9248	23.9001	23.9328	23.2433	5.82e-06	2.89e-06	22.5442	23.7426	23.7561	23.7262	23.5169	24.3064	23.837	23.2328	24.2594	24.4914	24.2654	23.6699	23.7846	24.2168	23.9236	23.5659	23.8206	24.2773	23.5278	23.8885	23.7913	24.4843	24.0667	24.1019	23.8303	24.5644	24.226	23.792	23.6023	24.3172	24.1161	23.6637
Glyma.04G021900.1	S465	1	Cold	StatsSet	24.9528	24.8579	23.9934	24.768	24.922	24.787	24.7443	24.8407	24.8121	25.029	24.7923	0.00135738	0.000428378	24.3697	25.3026	0	25.1861	23.8322	25.4102	25.2374	24.9517	24.2365	25.2007	25.2385	21.2981	24.281	24.574	25.4491	0	24.5859	24.9889	24.7867	25.3265	24.0581	25.1197	25.1832	0	24.4773	25.1182	24.6375	0	24.1294	25.189	25.2038	0
Glyma.04G021900.1	S465	1	Control	StatsSet	24.24	24.1268	24.4717	24.4869	24.1563	24.3414	24.3519	24.6126	24.5336	24.4888	24.223	0.00135738	0.000428378	23.7719	24.5268	24.0776	24.5836	23.8481	24.431	23.2014	25.0266	0	24.6399	24.4481	24.3271	24.2472	24.577	0	24.6365	23.9196	0	23.868	24.6814	23.4289	24.5065	24.3318	25.0983	23.993	24.7096	24.3201	24.3848	0	24.6919	24.6285	24.5173
Glyma.04G061700.1	S310	1	Cold	StatsSet	25.6573	25.284	25.5511	24.9876	25.5382	25.6491	25.5039	25.4019	25.597	25.8653	25.3197	0.129821	0.0300262	25.302	25.7789	25.6722	25.876	25.1859	25.1743	25.4917	0	25.0064	25.5244	25.6875	25.9861	25.1544	25.5081	26.102	23.186	25.5987	25.3903	25.5206	25.6431	25.5867	25.7174	25.4473	25.845	25.6526	25.7335	25.1381	25.4912	25.2857	25.8721	25.0479	0
Glyma.04G061700.1	S310	1	Control	StatsSet	25.2467	25.2929	25.9615	25.2277	25.328	25.3149	25.5329	25.1371	25.2141	25.323	25.3941	0.129821	0.0300262	24.8495	25.2596	25.4179	25.4596	24.8961	25.3414	25.6645	25.2695	0	25.2888	26.3972	26.1985	25.1934	25.539	25.0229	25.1553	24.8066	25.5613	25.1876	25.7566	24.737	25.7039	25.341	25.4777	25.0436	25.6098	26.2672	25.2108	24.8085	25.525	25.2256	24.9893
Glyma.04G104900.1	T1032	1	Cold	StatsSet	27.63	27.7414	26.9532	27.5228	27.1459	27.3061	28.2279	27.8736	27.8702	27.8683	26.8097	9.25e-05	3.53e-05	25.7173	27.5649	28.3364	28.9012	25.246	28.1646	28.6324	28.9228	23.2459	27.7426	28.467	28.3572	25.4604	27.252	28.5795	28.7992	25.8411	28.1277	26.6822	27.9323	25.3442	27.5979	27.8601	28.4222	27.5209	28.0935	29.0772	28.2201	26.6197	27.6338	28.5748	28.6662
Glyma.04G104900.1	T1032	1	Control	StatsSet	26.069	26.6466	26.8793	26.4241	26.4994	27.0025	27.647	26.6829	27.3284	26.7972	26.3964	9.25e-05	3.53e-05	25.1718	26.6456	27.1094	25.3492	25.6135	27.4715	27.4039	26.0974	27.9449	27.4749	27.1521	24.9453	25.8035	27.2134	27.5244	25.1553	25.8012	27.1538	26.7148	26.3276	27.0351	26.3303	28.0205	26.6243	27.3053	27.3742	28.2553	27.653	25.8761	26.6498	27.1903	27.0155
Glyma.04G121100.1	S316	1	Cold	StatsSet	23.4932	23.2042	23.4363	23.3721	23.4207	23.3593	23.3914	23.2402	23.453	23.4283	23.4953	6.91e-09	6.21e-09	23.158	23.6518	23.9086	23.2543	23.1077	23.3878	22.9236	23.3978	23.3379	23.502	23.5316	23.3737	23.3335	23.19	23.5504	23.4146	23.2099	23.0185	23.8121	23.6422	23.2808	23.1363	23.6608	0	23.1468	23.2009	23.6178	23.6001	23.2044	22.9217	23.5946	0
Glyma.04G121100.1	S316	1	Control	StatsSet	23.101	23.1173	23.2609	22.9129	23.0717	22.8842	22.8865	23.0263	23.1224	23.0022	23.1851	6.91e-09	6.21e-09	23.2728	22.829	23.0511	23.2511	22.7765	22.8572	23.4572	23.3782	22.4876	22.984	23.6537	23.9182	22.6711	22.6007	23.1018	23.2781	22.8901	23.1636	22.9794	23.2537	22.7141	22.9006	22.8402	23.0819	23.0214	22.5101	23.0824	22.9319	23.1259	22.9273	23.1905	22.8614
Glyma.04G122400.1	S319	1	Cold	StatsSet	26.6002	26.7279	26.8575	26.6755	26.6189	25.0345	26.7862	26.7142	26.767	26.9525	26.8247	0.289498	0.0622666	27.0181	26.4484	26.5004	26.4339	26.8821	26.3335	27.0175	26.6786	27.1678	26.5405	26.4708	27.251	26.5912	25.9836	27.1628	26.9645	26.4499	26.7002	26.7066	0	20.3176	26.022	26.8651	26.9331	27.3906	26.6877	27.1664	25.9003	26.8651	27.0142	26.3987	26.5786
Glyma.04G122400.1	S319	1	Control	StatsSet	26.5239	26.1751	26.5636	25.7688	26.3457	26.4711	26.3916	26.6104	26.399	26.6057	26.5576	0.289498	0.0622666	26.4645	26.5512	26.5297	26.5504	25.853	27.0007	26.105	25.7417	0	26.5346	26.9533	26.2029	26.3746	25.5141	25.2094	25.977	26.7245	26.2465	25.5575	26.8542	26.6384	26.6367	25.8728	26.7363	26.7553	26.8248	25.1199	26.8664	26.373	27.027	26.4092	26.6325
Glyma.04G156200.1	S1621	1	Cold	StatsSet	28.6391	29.2071	28.9409	28.4623	28.2422	28.4722	28.2411	28.1851	28.1107	27.9993	28.979	3.69e-11	4.89e-11	28.5618	29.2527	27.7261	29.0159	28.5755	29.0309	29.7252	29.4969	27.9443	29.4083	29.2035	29.2077	28.1044	28.2619	28.5355	28.9475	27.7289	28.7065	28.4222	28.1112	27.4372	27.9963	29.0556	29.3997	27.7765	28.1986	27.782	29.2071	27.6956	27.9023	28.5382	28.6043
Glyma.04G156200.1	S1621	1	Control	StatsSet	27.1004	27.554	27.329	27.5463	27.2657	28.4864	28.1182	27.4906	28.1304	28.4453	27.118	3.69e-11	4.89e-11	25.512	27.5914	27.9359	27.3623	27.3269	27.7012	27.7206	27.4673	26.9772	27.5185	27.2005	27.6196	27.3931	27.1855	27.9599	27.6466	27.3244	27.6226	26.8505	27.2655	27.8582	29.2011	28.6092	28.2768	28.1809	28.5098	28.1397	27.6423	25.9469	28.0849	28.2335	27.6971
Glyma.04G162600.1	S385	1	Cold	StatsSet	20.5768	20.589	20.769	20.6437	20.7073	20.9136	20.7196	20.8328	20.7405	21.0563	20.6071	1.12e-07	7.73e-08	22.0313	20.5853	19.964	19.7265	22.5065	20.0971	19.6261	20.1265	22.7624	20.5902	19.5441	20.1794	22.4912	20.4497	19.5042	20.1296	22.1157	20.6332	19.8938	20.1864	22.697	20.7314	19.924	20.3019	21.7807	21.0588	19.9378	20.1013	21.9619	20.7207	20.0379	20.6108
Glyma.04G162600.1	S385	1	Control	StatsSet	21.5923	21.2859	21.3319	21.5173	21.8636	21.3456	21.1342	21.7498	21.2285	21.5515	21.4287	1.12e-07	7.73e-08	22.103	21.7809	20.7139	21.7715	21.9835	21.4728	20.4013	0	21.7316	21.7433	20.5208	0	22.3972	21.4285	21.2145	21.0289	22.1375	21.0183	22.435	0	21.8271	21.4951	20.6803	21.3799	21.7394	21.1629	20.0473	21.587	22.2157	21.3625	0	21.6711
Glyma.04G163400.1	S206	1	Cold	StatsSet	23.655	23.4234	23.928	23.7404	23.5755	23.5702	22.9235	23.6792	23.2282	23.5177	23.5975	0.0793016	0.0191674	23.7199	23.4528	23.7923	0	23.9227	23.2119	23.1355	0	24.2958	23.9914	23.4967	0	23.4821	24.3408	23.3983	0	23.4442	23.84	23.4423	0	22.8659	24.2525	23.5923	0	22.7461	22.2311	23.7932	0	23.2424	24.2283	23.567	0
Glyma.04G163400.1	S206	1	Control	StatsSet	23.5224	23.1602	23.2611	23.3895	23.1122	23.3019	23.2288	23.3497	23.3419	23.4367	23.3581	0.0793016	0.0191674	23.9372	24.0672	22.5627	0	23.3301	23.2777	22.8729	0	23.3168	23.7116	22.755	0	23.4997	23.9738	22.6951	0	23.8848	23.0825	22.3694	0	23.6109	23.3635	22.9313	0	23.5462	23.1914	22.9486	0	23.8003	23.9071	22.3419	0
Glyma.04G176500.1	S419	1	Cold	StatsSet	22.6421	22.8834	23.0106	22.851	22.1231	22.8197	22.8386	22.8644	23.1046	23.1151	23.0634	7.16e-05	2.8e-05	23.7678	22.2307	22.7119	21.858	23.9396	23.0359	22.6859	21.8724	24.4816	22.5914	0	21.9589	23.8506	22.7395	22.6825	22.1315	23.3987	19.69	23.0559	22.3477	23.3116	22.8056	0	22.3417	23.2687	23.382	22.8764	21.8274	23.7747	23.1199	0	21.6987
Glyma.04G176500.1	S419	1	Control	StatsSet	23.3801	23.3033	23.3522	23.5881	23.8144	23.3938	23.5462	23.514	23.1464	23.2219	23.3804	7.16e-05	2.8e-05	24.4058	22.8391	22.6339	23.6414	23.9862	23.1906	22.405	23.6316	23.5117	23.3156	22.5385	24.043	24.3479	23.3141	22.8208	23.8695	24.3582	23.6121	23.756	23.5312	23.7162	23.2487	22.8216	23.7888	23.6607	23.2961	0	23.6818	23.5405	23.2916	0	23.7099
Glyma.04G185000.1	S831	1	Cold	StatsSet	25.2818	24.9401	25.0255	25.2244	25.1514	25.0363	24.8108	24.5749	24.8686	24.9233	25.0997	1.82e-07	1.19e-07	25.143	25.8567	24.8458	0	23.6604	25.1728	25.9872	0	24.4869	25.3459	25.2437	0	25.0594	25.6352	24.9784	0	24.4261	25.4907	25.5374	0	24.1431	25.6473	25.3184	0	23.9558	25.4706	25.0062	0	24.1148	24.5027	25.1071	0
Glyma.04G185000.1	S831	1	Control	StatsSet	24.6911	24.6346	24.5345	23.78	23.9453	24.2993	24.3027	24.3352	24.3876	24.6424	24.4958	1.82e-07	1.19e-07	23.7974	24.8808	25.3951	0	23.8843	24.5688	25.4507	0	23.8603	24.8242	24.919	0	23.7268	23.2664	24.3466	0	23.6989	23.7315	24.4054	0	23.5365	24.7117	24.6498	0	23.8541	24.4442	24.6099	0	23.6737	24.3288	25.0033	0
Glyma.04G186400.1	S3	1	Cold	StatsSet	25.8344	25.5962	24.9631	25.8279	26.0004	25.7494	25.7395	25.7493	25.7909	25.9267	25.5993	0.0207147	0.00566398	24.6376	26.4148	26.4509	0	24.958	25.9689	25.8617	0	21.8349	26.8423	26.2122	0	24.52	27.0158	25.948	0	25.0598	26.5119	26.4297	0	24.2052	26.7316	26.3113	0	24.8195	26.1201	26.2789	0	24.9099	26.1102	26.2279	0
Glyma.04G186400.1	S3	1	Control	StatsSet	25.4507	25.1744	25.4626	25.3439	24.6231	25.415	25.2827	25.2541	25.5415	25.5209	25.2449	0.0207147	0.00566398	25.4161	25.4621	25.474	0	24.8303	25.2036	25.4894	0	25.5108	25.1562	25.7208	0	24.856	25.9003	25.2754	0	24.7667	25.1271	23.9754	0	25.1426	25.3692	25.7333	0	24.7171	25.3001	25.8307	0	25.4568	25.3379	24.9676	0
Glyma.04G191500.1	S106	1	Cold	StatsSet	28.5155	29.0583	28.9185	28.6575	28.8709	28.5648	28.9764	27.3708	28.8986	28.6397	28.7613	0.000318527	0.000112043	27.9675	28.7741	28.6583	28.6622	27.5057	29.1162	29.3982	30.2131	27.4131	28.9091	29.6436	29.7082	27.6667	28.2547	28.9562	29.7522	28.4017	29.1365	29.1395	28.8061	27.6667	28.7075	28.7394	29.1457	27.9383	29.0922	29.3516	29.5236	27.1098	23.1296	29.9953	29.2485
Glyma.04G191500.1	S106	1	Control	StatsSet	27.9395	28.0026	28.1582	28.1777	27.1522	28.4862	27.674	27.941	28.257	27.9421	28.3223	0.000318527	0.000112043	27.3185	27.9739	28.2353	28.2305	27.3222	27.6556	27.7964	29.236	28.2891	27.3733	28.0231	28.9475	27.8081	28.3105	28.2541	28.3383	27.7719	27.0126	25.6629	28.1612	28.3381	28.0813	28.9985	28.5268	27.0773	27.6392	28.0831	27.8966	27.7852	27.8696	28.107	28.0022
Glyma.04G210100.1	S32	1	Cold	StatsSet	24.5479	24.388	24.3712	24.2784	24.3298	24.2917	24.2438	24.1897	23.8922	24.2504	24.2999	0.668938	0.132876	24.6752	24.2296	24.739	0	24.3475	24.3318	23.8121	25.0605	24.3078	24.2044	24.2127	24.76	23.9716	24.4672	24.3965	0	24.6809	24.1152	24.1934	0	23.9955	24.5321	24.3475	0	24.0503	24.4299	24.2511	0	23.8637	24.4271	24.1004	24.3677
Glyma.04G210100.1	S32	1	Control	StatsSet	24.3199	24.2024	24.1585	24.2948	24.224	24.0672	24.2982	24.1938	24.2116	24.1956	24.5195	0.668938	0.132876	24.545	24.2707	24.7314	23.7325	24.2233	24.1133	24.4643	24.0086	23.3763	23.788	24.9485	24.5213	24.6022	24.3261	24.2155	24.0354	24.4208	24.3164	24.3049	23.8538	24.0385	24.4607	23.94	23.8296	24.0663	24.7154	24.6065	23.8047	24.3252	24.2623	23.9812	24.2067
Glyma.04G217100.1	S146	1	Cold	StatsSet	24.0536	23.9061	24.5256	24.6886	24.3129	24.4061	23.8339	24.093	23.9288	23.5587	24.553	0.000160117	5.85e-05	26.0907	24.1269	23.7547	22.242	25.1819	23.44	23.6633	23.3392	26.6189	24.2887	23.4652	23.7297	26.1286	24.5245	23.4126	0	25.8186	23.4989	23.6212	0	25.5777	24.8694	24.2202	22.9572	24.2141	23.6448	23.5677	23.9092	23.645	24.3982	24.158	24.171
Glyma.04G217100.1	S146	1	Control	StatsSet	24.7944	24.6624	24.901	24.7355	25.0452	24.7943	24.51	24.6735	24.2512	25.1449	24.354	0.000160117	5.85e-05	24.9713	24.9696	24.1962	25.0404	24.7649	24.6094	24.3743	24.9008	24.4005	25.644	24.2537	25.3059	25.2571	24.866	24.6371	24.1818	25.3999	24.7502	25.4639	24.5671	24.725	25.5897	25.117	23.7457	24.7963	24.8452	23.9507	24.448	25.042	24.9394	24.7051	24.0076
Glyma.04G229000.1	S100	1	Cold	StatsSet	28.9641	29.3081	28.8621	29.2709	29.001	29.3284	29.5647	27.7336	29.4096	30.0885	28.8178	0.0580776	0.0144737	27.8138	29.1853	29.8932	0	28.8544	29.5532	29.5166	0	27.2781	29.6158	29.6923	0	28.1337	29.6173	30.0615	0	28.4463	30.5302	28.0265	0	28.507	29.9716	29.5066	0	28.5084	30.2325	29.9533	0	29.4102	23.6123	30.1784	0
Glyma.04G229000.1	S100	1	Control	StatsSet	29.3218	29.6258	30.3518	29.4548	29.3961	29.319	30.22	29.4568	29.5723	29.2266	29.9227	0.0580776	0.0144737	28.1963	29.4365	30.3326	0	28.1339	29.8996	30.8438	0	31.3235	29.7446	29.9875	0	28.7936	30.1445	29.4264	0	29.0033	29.4419	29.743	0	29.645	28.6647	29.6474	0	29.58	29.886	31.1941	0	29.0264	29.8616	29.4824	0
Glyma.04G236500.1	S494	1	Cold	StatsSet	23.7129	23.454	23.8776	23.8722	23.3516	22.4084	23.6898	23.5982	23.4813	23.358	23.3599	0.601561	0.121276	23.8261	24.0941	23.7704	23.1609	22.9031	23.5923	23.8666	0	23.6336	23.8738	0	24.1254	23.4193	23.8103	24.2156	24.0436	23.3062	23.0468	23.5811	23.4725	23.2782	0	20.7155	23.2315	23.138	23.9342	23.7351	23.9521	22.2874	23.9797	24.0466	24.079
Glyma.04G236500.1	S494	1	Control	StatsSet	23.4795	23.7077	23.6666	23.07	23.6011	23.4605	23.2859	23.1013	23.2968	23.606	23.3846	0.601561	0.121276	23.3039	23.7183	0	23.4164	23.4869	23.783	24.13	23.4307	22.9684	23.8763	24.5258	23.2958	23.5808	23.053	0	22.5763	23.0625	24.2854	23.7912	23.2653	23.0065	23.8397	23.5353	0	23.7123	23.5016	23.4973	22.4325	23.2184	23.6616	23.1671	22.3579
Glyma.05G033500.1	S484	1	Cold	StatsSet	26.0041	25.7033	25.6433	25.7435	25.8473	25.9425	26.116	25.0638	25.9936	26.1496	25.7479	1.32e-11	2.12e-11	24.9284	26.6729	26.122	26.2931	24.3015	26.4343	26.2186	25.8589	23.657	26.4726	26.1541	26.2895	24.4131	25.5068	26.4008	26.6531	24.8557	26.5433	26.328	25.6624	24.4866	26.7772	26.1334	26.3727	24.8205	26.8752	26.316	26.4525	24.5774	23.0107	26.1934	26.4738
Glyma.05G033500.1	S484	1	Control	StatsSet	23.9334	25.0011	24.5531	25.0791	23.8628	25.1166	24.5747	25.1405	25.1454	25.1125	24.4741	1.32e-11	2.12e-11	22.2953	25.4028	25.2758	22.7598	24.5625	24.7777	25.4385	25.2256	23.6466	24.9243	25.0956	24.5458	23.6513	25.7945	24.7089	26.1617	22.027	24.5348	23.802	25.0876	24.4068	24.9297	25.5932	25.5369	24.0736	24.9266	24.9817	24.3168	0	25.2399	25.2061	24.9755
Glyma.05G049200.1	S292	1	Cold	StatsSet	25.8012	25.6689	25.935	25.7837	25.8077	25.8198	25.7953	25.9211	25.6873	26.0325	23.9379	0.792067	0.153717	26.1961	25.3998	25.7947	25.8141	26.1966	25.3823	25.1625	25.9342	26.8357	25.9406	25.3795	25.5841	26.0374	26.153	25.1609	0	26.2385	25.946	25.4832	25.5633	25.5611	26.6059	25.4374	25.675	25.6282	25.9713	25.6687	25.913	25.7579	26.4185	25.5227	25.9853
Glyma.05G049200.1	S292	1	Control	StatsSet	26.168	23.3959	26.1425	26.2202	26.2035	25.9646	25.9456	26.2494	25.9325	24.5909	25.9656	0.792067	0.153717	26.3939	26.5833	25.6626	26.0322	0	25.9138	25.612	18.6618	26.3581	26.4542	25.6152	0	26.4884	26.3025	26.0123	26.0776	26.5462	25.843	26.4021	26.0227	26.2542	26.0026	25.7418	25.8598	26.0851	26.0824	25.5943	26.0203	26.3211	27.0245	25.5625	26.0894
Glyma.05G049200.1	S320	1	Cold	StatsSet	27.2503	27.3759	27.3877	27.4016	26.8806	26.9853	27.5218	27.1975	27.1315	27.132	27.3917	0.0553898	0.0139584	26.842	27.1686	27.0732	27.9176	26.6236	27.3569	27.3004	28.2229	26.6411	27.4328	27.2861	28.1909	26.8167	27.6357	27.1582	27.996	26.233	27.1247	26.8194	27.3452	26.8144	26.8326	26.5639	27.7305	27.5972	26.9651	27.568	27.957	27.0474	27.5342	26.6867	27.5216
Glyma.05G049200.1	S320	1	Control	StatsSet	27.2707	27.2468	27.1264	26.7623	26.822	27.0087	27.1087	27.2181	27.1654	27.1055	26.9826	0.0553898	0.0139584	27.0647	27.2328	27.6143	27.171	26.8267	27.4635	27.5865	27.1106	27.1596	26.8865	27.4227	27.037	27.1517	26.8339	26.6815	26.3819	27.3301	26.6903	25.9155	27.352	26.5808	26.8897	27.1672	27.3971	27.2845	27.493	26.7626	26.8948	27.2363	27.4624	27.0907	27.083
Glyma.05G054700.1	T31	1	Cold	StatsSet	25.6569	25.159	25.2797	25.3785	25.2804	25.1158	25.6047	25.0021	25.2183	25.2099	25.4705	0.00041263	0.000143648	24.731	26.2234	26.0161	0	23.4608	25.7483	26.2677	0	23.7845	26.0623	25.9923	0	24.3378	25.9816	25.8161	0	24.0865	25.6108	26.1441	0	23.8945	25.3642	26.0885	0	25.0718	25.6676	26.0747	0	23.8604	25.2664	25.8794	0
Glyma.05G054700.1	T31	1	Control	StatsSet	24.934	24.8886	25.0475	24.9586	24.383	25.3515	24.8983	24.8756	25.0915	25.4205	24.8745	0.00041263	0.000143648	23.598	25.3072	25.8967	0	23.9287	25.3732	25.364	0	24.5537	25.2306	25.3581	0	23.9995	25.24	25.6362	0	23.6953	24.8553	24.5983	0	24.0284	25.8648	26.1613	0	23.9827	25.1127	25.5993	0	23.9509	24.8156	25.8603	0
Glyma.05G070300.1	S158	1	Cold	StatsSet	24.5216	24.1444	24.3067	24.3972	24.522	24.4686	24.5304	24.3404	24.2294	24.206	24.4094	4.94e-05	2.02e-05	25.4357	25.0233	24.769	22.8581	24.6264	25.2124	25.2075	21.5313	25.0083	25.1519	25.0696	21.9971	25.0248	25.2088	25.3635	21.9919	24.968	24.7688	24.8493	23.5018	24.7463	25.2288	25.0759	22.8232	24.8755	25.317	25.114	22.815	24.5943	25.3194	25.2031	22.2447
Glyma.05G070300.1	S158	1	Control	StatsSet	24.8854	25.1532	25.3344	24.9625	25.4469	25.0747	24.9094	24.7819	24.4466	25.2406	24.9797	4.94e-05	2.02e-05	24.3155	25.3736	25.3691	24.4834	24.9099	25.5471	25.2306	24.9251	24.6476	25.628	25.7318	25.3304	24.6395	25.5041	25.247	24.4594	24.4199	26.2928	26.3948	24.6801	24.5121	25.8965	25.2916	24.5986	24.1389	25.4965	25.4166	24.5855	24.1474	25.1961	25.5529	24.2313
Glyma.05G073300.1	S516	1	Cold	StatsSet	23.4393	23.566	23.6497	23.6603	23.3814	23.4624	23.4222	23.6543	23.5033	23.7041	23.5181	7.91e-12	1.3e-11	23.1618	23.255	23.7639	23.5764	23.0442	24.0954	23.8083	23.3159	23.9231	23.6971	23.4712	23.5075	23.2022	23.8092	23.7065	23.9233	22.9633	23.5511	23.6299	0	22.9874	23.539	23.7	23.6232	23.0703	23.5988	23.8161	23.2036	23.5689	23.8838	23.51	0
Glyma.05G073300.1	S516	1	Control	StatsSet	23.198	23.0153	23.04	23.0002	22.8778	23.1564	23.0023	22.9481	22.9708	22.9367	22.9711	7.91e-12	1.3e-11	23.1999	23.2115	22.9635	23.4171	23.21	22.6505	23.0538	23.1467	23.012	22.7388	22.9019	23.5074	23.0952	22.799	22.8375	23.269	22.934	23.0707	22.54	22.9664	22.9983	22.8786	23.3351	23.4137	22.9425	23.0523	23.0119	23.0026	23.0451	22.5246	22.9541	23.2686
Glyma.05G077100.1	S45	2	Cold	StatsSet	24.5006	24.6023	24.468	24.5125	24.9015	25.0741	25.5442	25.747	25.3402	25.5081	23.2092	0.336757	0.0708518	24.9051	24.4646	0	24.1321	24.9288	24.4277	25.2749	23.7777	24.7265	23.9826	25.1743	23.9885	24.8827	24.1434	24.8735	24.1505	25.0593	24.679	24.8988	24.969	25.3828	24.7409	0	25.0985	26.3433	24.8015	25.4878	0	26.2678	25.3251	25.6481	0
Glyma.05G077100.1	S45	2	Control	StatsSet	24.0427	24.3552	24.4187	24.5382	24.7408	25.5069	25.1878	24.9351	25.1944	24.9823	24.3855	0.336757	0.0708518	24.0525	23.9035	23.9202	24.2946	24.3984	24.4163	24.4197	24.1863	23.7638	24.379	25.1358	24.3961	24.0926	24.2849	25.0873	24.6879	24.4705	24.1339	25.1425	25.2163	25.2107	25.7629	25.3539	25.7001	24.9744	24.9435	25.4175	25.4158	24.8739	24.3906	25.4595	25.0165
Glyma.05G077100.1	T43	2	Cold	StatsSet	24.5006	24.6023	24.468	24.5125	24.9015	25.0741	25.5442	25.747	25.3402	25.5081	23.2092	0.336757	0.0708518	24.9051	24.4646	0	24.1321	24.9288	24.4277	25.2749	23.7777	24.7265	23.9826	25.1743	23.9885	24.8827	24.1434	24.8735	24.1505	25.0593	24.679	24.8988	24.969	25.3828	24.7409	0	25.0985	26.3433	24.8015	25.4878	0	26.2678	25.3251	25.6481	0
Glyma.05G077100.1	T43	2	Control	StatsSet	24.0427	24.3552	24.4187	24.5382	24.7408	25.5069	25.1878	24.9351	25.1944	24.9823	24.3855	0.336757	0.0708518	24.0525	23.9035	23.9202	24.2946	24.3984	24.4163	24.4197	24.1863	23.7638	24.379	25.1358	24.3961	24.0926	24.2849	25.0873	24.6879	24.4705	24.1339	25.1425	25.2163	25.2107	25.7629	25.3539	25.7001	24.9744	24.9435	25.4175	25.4158	24.8739	24.3906	25.4595	25.0165
Glyma.05G101700.1	S40	1	Cold	StatsSet	26.8505	27.0281	27.3851	26.8234	27.1485	26.5424	27.1293	26.7295	26.6606	26.8165	26.97	0.044618	0.0113712	25.4073	26.7964	27.534	27.6643	25.6942	26.79	27.6358	27.9923	25.4412	26.9233	28.5008	28.6751	25.5645	27.0647	27.077	27.5874	25.9204	26.4664	28.2661	27.9411	25.4991	26.8688	26.8348	26.9668	25.6921	27.0888	27.5702	28.1663	26.1498	26.8084	26.8547	27.1051
Glyma.05G101700.1	S40	1	Control	StatsSet	26.3996	26.5874	26.9377	26.4096	25.9692	26.2271	26.7378	27.1895	26.9368	27.1696	26.7151	0.044618	0.0113712	26.116	26.9565	26.7982	25.7277	25.5799	26.8003	27.6456	26.3239	25.5467	27.1021	27.937	27.1651	26.034	27.1236	26.7038	25.7772	25.4258	26.5266	26.0967	25.8276	25.8218	26.7738	26.7891	25.5237	26.2062	26.3293	27.5753	26.8405	26.7124	26.9234	27.4674	27.655
Glyma.05G139400.1	T89	1	Cold	StatsSet	20.9624	22.0833	21.7044	21.6393	22.4077	22.3688	22.1467	23.0918	22.6569	21.2093	21.7894	0.0105552	0.00299523	0	20.3891	21.1099	21.3881	23.46	22.4291	21.183	21.2611	0	21.7667	21.4949	21.8516	21.9449	21.3667	22.053	21.1926	22.49	23.3587	0	21.3743	22.7038	22.4419	22.1984	22.1312	23.4019	22.7871	21.5606	20.8375	23.9479	23.0087	22.3189	0
Glyma.05G139400.1	T89	1	Control	StatsSet	22.6233	22.9622	22.4114	22.8468	23.6089	22.8378	21.717	22.7177	22.63	21.7428	23.2881	0.0105552	0.00299523	23.2326	21.6319	22.0729	23.5559	22.9318	22.2013	22.7421	23.9738	0	20.4332	22.3774	24.4234	22.7442	23.2153	21.6791	23.7489	23.3091	0	23.5095	24.008	23.8603	21.6517	21.7757	24.0635	23.4614	0	21.6374	20.0522	23.5695	22.7864	21.596	22.9188
Glyma.05G157300.1	T349	1	Cold	StatsSet	26.6175	26.0305	26.0384	25.9823	25.7824	26.221	25.7928	25.8179	24.5772	25.1705	26.0543	4.67e-08	3.47e-08	25.6974	26.2034	0	27.9515	25.3986	25.8581	0	26.8349	25.8568	25.4053	0	26.8531	25.8008	25.7924	0	26.3536	25.2136	25.5954	0	26.5383	26.1096	25.5988	0	26.9548	25.7811	25.6372	0	25.96	25.7415	25.7475	0	25.9648
Glyma.05G157300.1	T349	1	Control	StatsSet	27.4425	26.984	26.6308	26.8081	26.1236	27.1472	27.1735	27.0863	27.6045	26.7498	27.2508	4.67e-08	3.47e-08	27.4768	27.4441	0	27.4067	27.2955	26.6795	0	26.977	26.903	26.32	0	26.6695	26.8638	26.7624	0	26.7982	26.5764	24.5763	0	27.2181	27.0029	26.7692	0	27.6694	27.1686	27.1762	0	27.1755	27.1136	27.0171	0	27.1282
Glyma.05G168100.1	S348	1	Cold	StatsSet	23.7581	24.1469	23.9887	23.0253	24.2449	24.1506	24.488	24.1353	24.2677	24.2621	23.273	0.00104114	0.000334834	23.6061	24.4558	0	23.2123	23.8244	24.1172	24.7236	23.9224	23.2045	24.6473	24.19	23.913	24.1341	24.0646	0	20.8773	23.8771	24.5534	24.641	23.9082	24.3422	24.017	24.0926	0	24.5433	24.7596	25.3335	23.3158	24.1515	23.9575	24.7423	23.6899
Glyma.05G168100.1	S348	1	Control	StatsSet	23.8772	23.4028	23.3906	23.149	23.3995	22.9236	23.6907	23.7182	23.5982	23.4403	23.5524	0.00104114	0.000334834	24.3843	23.6111	23.7449	23.7686	23.1237	23.949	23.6146	22.924	0	23.4695	23.716	22.9863	23.6276	22.4996	24.0505	22.4184	23.3344	23.5722	23.0209	23.6705	20.8224	23.3641	23.8655	23.6424	23.5697	23.9596	23.7149	23.5187	24.1741	23.2324	24.0422	23.424
Glyma.05G174300.1	S115	1	Cold	StatsSet	28.1858	28.7072	28.3142	28.5791	28.7322	28.8841	29.021	28.9652	28.9569	29.0607	28.4007	0.124908	0.0289894	26.8867	28.6447	29.0261	0	27.9894	29.0012	29.1309	0	25.8596	29.1831	29.8999	0	27.363	29.1523	29.2219	0	27.9836	30.1547	28.0581	0	27.4584	29.6057	29.5882	0	28.3316	29.1373	29.5939	0	28.0218	28.7912	30.0826	0
Glyma.05G174300.1	S115	1	Control	StatsSet	28.7614	28.8318	29.7501	28.8997	28.7028	28.8395	29.5974	28.7232	29.1871	28.7081	29.1204	0.124908	0.0289894	28.0214	29.1073	29.1556	0	27.7011	29.1954	29.5988	0	30.6435	29.3268	29.2799	0	28.4646	28.9221	29.3124	0	28.6814	29.0442	28.3829	0	29.6091	27.7521	29.1572	0	29.8365	28.7572	30.1985	0	29.0886	28.8724	28.2086	0
Glyma.05G187700.1	S4	1	Cold	StatsSet	28.3576	27.9252	28.1606	28.3433	28.0011	28.27	27.5512	27.9044	28.1417	28.3277	28.2917	1.45e-05	6.59e-06	27.362	29.3271	28.3836	0	26.1972	29.0938	28.4845	0	26.6434	29.6492	28.1891	0	27.213	29.6201	28.1968	0	26.0494	29.2992	28.6546	0	26.6578	29.3782	28.7739	0	25.4958	29.026	28.1318	0	25.3756	29.431	28.9066	0
Glyma.05G187700.1	S4	1	Control	StatsSet	26.8801	27.2458	26.2984	26.5225	26.4186	26.9457	26.9128	26.8156	27.3559	27.4721	26.9852	1.45e-05	6.59e-06	26.1454	27.0413	27.4536	0	26.6274	26.7608	28.3491	0	24.6616	26.525	27.7085	0	26.6897	27.1586	25.7193	0	27.0897	27.105	25.0612	0	26.7637	27.3601	26.7132	0	27.5253	27.6706	25.5424	0	26.574	27.312	26.5606	0
Glyma.05G199100.1	S975	1	Cold	StatsSet	24.9668	24.9737	25.0073	25.4025	25.0326	25.1468	25.3072	25.3571	25.1788	25.3018	25.0222	0.990569	0.185318	24.1266	25.1466	25.4992	25.095	23.8706	25.6101	25.2432	25.1708	23.2867	25.3202	25.7198	25.7025	23.8255	25.4939	26.8381	25.4527	24.1879	26.0835	24.4324	25.4268	23.6634	25.7226	25.9518	25.2496	24.1313	26.063	26.0988	24.9358	24.0631	25.6958	26.3483	25.3211
Glyma.05G199100.1	S975	1	Control	StatsSet	24.7813	25.1602	25.7079	24.9434	25.3766	24.6607	25.7031	24.9184	25.0681	25.1025	25.2608	0.990569	0.185318	23.4562	25.531	25.6933	24.4448	24.4306	26.0537	25.9611	24.1953	25.7676	26.2743	26.2393	24.5504	24.402	25.6522	25.6697	24.0498	24.0954	26.6358	26.1895	24.5855	24.5999	24.4563	25.3454	24.2412	24.829	25.8104	26.7061	25.4668	23.962	25.5892	25.4533	24.6689
Glyma.05G218400.1	S103	1	Cold	StatsSet	26.2425	25.721	26.1096	25.9262	26.0892	26.1252	26.0319	25.9778	26.0041	26.2099	26.0785	0.933561	0.176116	26.1196	26.2605	26.3306	26.2595	25.6255	26.0664	25.4213	25.7709	26.4725	25.8745	26.2645	25.827	26.0713	25.9447	25.7788	25.91	25.4945	26.0579	26.1594	26.6448	25.9313	26.1848	26.128	26.2569	25.8844	25.8445	26.2222	26.1767	25.9303	25.7198	25.921	26.3401
Glyma.05G218400.1	S103	1	Control	StatsSet	26.2865	26.0223	25.8626	26.1409	25.7395	26.0358	25.927	26.3052	26.233	26.4078	25.6283	0.933561	0.176116	26.5233	25.8421	26.3941	26.3864	26.0443	26.054	25.536	26.4548	26.0192	25.8157	25.3105	26.3051	25.9795	26.0299	26.1188	26.4353	25.9205	25.3831	25.7524	25.9021	26.0281	25.5443	26.0067	26.5642	26.3008	25.8999	25.5279	25.9793	26.4544	25.8607	26.6008	26.3049
Glyma.05G220300.1	S1075	1	Cold	StatsSet	27.5739	27.7129	27.6995	27.7353	27.6201	27.769	27.7058	27.5641	27.5065	27.6372	27.5127	5.07e-13	1.18e-12	27.1385	27.6385	27.3644	28.1543	26.9392	27.2253	28.2894	28.3977	26.996	27.4742	27.9993	28.3286	27.4277	27.1158	28.2416	28.1562	27.011	27.6986	28.1666	27.6043	27.5434	27.3873	28.0166	28.1287	27.5459	27.6602	27.6176	27.9995	27.262	27.6124	27.6939	27.6879
Glyma.05G220300.1	S1075	1	Control	StatsSet	27.1162	27.2255	27.1909	27.1023	26.5384	27.1683	27.2839	27.1081	27.1654	27.2321	27.0417	5.07e-13	1.18e-12	26.6763	27.1703	27.4186	27.1997	27.0375	27.1978	27.2754	27.3913	27.1996	26.8913	27.4691	27.2035	26.9255	27.228	26.8923	27.3634	26.7152	26.2826	26.1501	27.0058	26.9144	27.1078	27.1822	27.469	27.4297	27.1099	27.6729	26.9231	27.0171	27.0847	27.2765	27.0543
Glyma.05G237000.1	S124	1	Cold	StatsSet	29.4944	29.2188	29.1831	29.4026	29.3704	29.4029	29.7579	29.5264	29.9423	29.6834	29.2569	2.36e-11	3.38e-11	28.5838	29.8636	30.0357	0	28.3013	29.4459	29.9092	0	28.5219	29.4189	29.6085	0	28.7314	29.7166	29.7598	0	28.3893	29.7743	29.9475	0	29.121	29.4893	29.5985	0	29.2351	29.96	30.0786	0	29.3301	29.8341	29.4151	0
Glyma.05G237000.1	S124	1	Control	StatsSet	28.7168	28.6378	28.4938	28.2474	28.0272	29.0028	28.8049	29.0031	29.1785	28.8775	28.6744	2.36e-11	3.38e-11	28.5485	28.6198	28.9822	0	28.1188	28.6493	29.1453	0	28.1734	28.5145	28.7934	0	27.4615	28.7019	28.5788	0	28.1556	27.9838	27.9422	0	29.0119	28.5941	29.4024	0	28.9311	28.6521	28.8314	0	29.1009	28.6842	29.2241	0
Glyma.05G243200.1	S295	1	Cold	StatsSet	27.3869	27.1067	27.227	27.3283	27.3886	27.2414	27.4396	27.4493	27.2416	27.1795	27.3365	9.34e-05	3.54e-05	27.1993	27.4655	27.5397	27.343	27.5852	27.1562	26.451	27.2346	27.5096	27.1106	27.2811	27.0068	27.6355	27.2254	27.3693	27.083	27.6533	26.9572	27.6684	27.2757	27.3126	26.9988	26.9598	27.6944	27.4701	26.7431	27.7889	27.7564	27.5099	0	27.1797	27.6584
Glyma.05G243200.1	S295	1	Control	StatsSet	27.5071	27.6046	27.7041	27.7309	27.666	27.4865	27.3711	27.6443	27.6589	27.4637	27.5231	9.34e-05	3.54e-05	27.7953	27.205	27.3847	27.6436	28.0347	27.32	26.9845	28.0793	27.8634	27.519	26.9636	28.4705	27.8327	27.2973	27.6164	28.1774	27.7081	27.5291	27.7846	27.6422	27.9835	27.0366	27.1298	27.7959	27.6867	27.0824	27.4865	27.2285	27.965	27.2663	27.6372	27.7086
Glyma.05G243200.1	S37	1	Cold	StatsSet	24.7961	24.0988	24.1177	24.2838	24.263	24.2851	24.0658	24.0858	24.2289	24.016	24.4353	4.06e-09	3.86e-09	25.063	24.6601	24.665	0	25.099	23.9137	23.2838	0	24.9661	23.485	23.9019	0	25.146	23.7207	23.9845	0	24.868	23.5896	24.3315	0	24.7153	23.5956	24.5443	0	24.6464	23.3073	24.2438	0	24.9406	23.6106	23.7061	0
Glyma.05G243200.1	S37	1	Control	StatsSet	24.8167	24.8819	24.688	24.8759	25.0888	24.7833	24.7802	24.908	24.5993	24.9523	24.5859	4.06e-09	3.86e-09	25.302	24.2497	24.8983	0	25.428	24.5662	24.6514	0	24.8162	24.674	24.5736	0	25.2192	24.4845	24.9241	0	25.2827	24.7297	25.2541	0	25.7547	24.2819	24.3134	0	24.9998	24.8752	24.4657	0	25.1753	24.7574	24.7913	0
Glyma.06G008300.1	S1005	1	Cold	StatsSet	24.693	24.7518	25.0727	24.7953	24.4649	24.7173	24.3559	24.5035	24.5337	24.5754	24.822	0.0383494	0.00996152	24.8221	24.9165	24.4005	24.6328	24.1332	25.063	25.0128	24.7982	25.3694	25.2639	24.5328	25.1247	24.2186	25.3558	24.4502	25.1568	23.9638	24.7748	24.5297	24.5915	24.0653	25.4237	24.8671	24.513	22.9766	25.0968	24.4361	24.9139	23.1746	25.4158	24.5123	24.9113
Glyma.06G008300.1	S1005	1	Control	StatsSet	24.7822	24.6242	24.5735	24.4111	24.5029	24.3921	24.2529	24.4518	24.4549	24.587	24.3497	0.0383494	0.00996152	24.5473	25.4577	24.6865	24.4371	24.4039	24.8194	24.7556	24.5181	24.1856	24.981	24.578	24.5494	24.2251	24.5898	24.3123	24.5173	24.6171	24.6434	24.495	24.2562	24.494	24.3732	24.4919	24.2094	24.4068	24.4712	24.1649	23.9686	24.4294	25.238	24.1673	23.9726
Glyma.06G037000.1	S31	2	Cold	UniqueSet	0	0	0	0	0	0	0	0	0	0	0	NA	NA	21.5569	0	0	0	22.1797	0	0	0	0	0	0	0	21.8482	0	0	0	0	0	0	0	0	0	0	0	21.3826	0	0	0	0	0	0	0
Glyma.06G037000.1	S31	2	Control	UniqueSet	0	0	0	0	22.1582	0	0	0	0	0	0	NA	NA	0	0	0	0	21.889	0	0	0	0	0	0	0	0	0	0	0	22.6279	22.4028	0	21.444	21.9786	0	0	0	21.9263	0	0	0	22.1631	0	0	0
Glyma.06G040600.1	S618	1	Cold	StatsSet	26.2386	26.3963	26.3289	26.1311	26.478	25.9716	26.4726	26.2509	26.0404	26.3586	26.2724	3.8e-16	1.35e-15	25.1744	26.414	26.6219	26.7442	24.9579	26.5624	26.9529	27.1121	24.4697	26.791	27.1051	26.9499	24.8478	26.9918	25.7778	26.9068	25.1957	27.0181	26.7549	26.9434	24.5911	26.8434	26.4803	0	25.1064	26.2724	27.2462	27.2656	24.8972	26.2122	27.079	26.8153
Glyma.06G040600.1	S618	1	Control	StatsSet	24.7654	25.2285	25.2559	24.924	24.8898	25.4879	24.9623	24.6107	25.3742	25.3471	24.9522	3.8e-16	1.35e-15	22.9143	25.9285	25.9989	24.2197	24.8737	24.9724	26.1651	24.9027	24.4783	25.4013	25.8398	25.3041	24.2473	25.7291	25.3084	24.4111	24.3741	25.4861	24.8743	24.8245	25.152	25.4731	25.862	25.4644	24.7744	25.1696	25.2564	24.649	22.5785	25.1411	25.7421	24.981
Glyma.06G051200.1	S73	1	Cold	StatsSet	25.4094	25.3548	25.4709	25.4634	25.4933	25.4361	25.2344	24.9278	24.8801	25.4644	25.3546	4.8e-05	1.98e-05	25.5294	25.4056	25.2932	0	25.4683	25.4868	25.1092	0	25.3782	25.5497	25.4846	0	25.5814	25.3608	25.4479	0	25.6434	25.4547	25.3817	0	24.8588	25.7298	25.7199	0	24.408	25.9022	25.3929	0	23.9946	25.6474	25.1414	0
Glyma.06G051200.1	S73	1	Control	StatsSet	25.7192	25.7065	26.1822	25.8338	25.683	25.6344	25.623	25.5877	25.4692	25.6957	25.6896	4.8e-05	1.98e-05	25.3372	25.7185	26.1018	0	25.8186	25.6679	25.6329	0	26.6921	25.7954	26.0591	0	25.6992	26.0122	25.7901	0	25.3125	26.0202	25.7165	0	25.4276	25.7713	25.7044	0	25.1778	25.9462	25.7452	0	25.1874	25.9148	25.6608	0
Glyma.06G054300.1	S74	1	Cold	StatsSet	21.2466	22.1569	21.5793	22.191	22.2533	22.3554	22.3712	22.1392	22.2789	22.4691	21.4529	2.05e-06	1.08e-06	22.9602	19.1119	21.6858	21.2287	23.3575	0	21.7294	21.3837	23.6141	19.7801	0	21.3437	22.9584	21.9781	0	21.6364	22.9058	0	22.0792	21.775	23.1534	22.2184	0	21.6944	23.2803	22.2254	0	21.6079	23.0094	22.2095	21.5203	21.8174
Glyma.06G054300.1	S74	1	Control	StatsSet	22.6639	22.6585	22.6723	22.9069	23.0899	22.5509	22.5318	22.5813	22.4445	22.5311	22.68	2.05e-06	1.08e-06	23.2284	22.5872	22.1641	22.6757	23.2571	22.5442	22.1438	22.689	0	22.6938	22.2832	23.04	23.5084	22.5492	22.2295	23.3407	23.3237	23.1612	23.0327	22.8421	22.7688	22.7972	22.1995	22.4379	22.9451	22.66	21.8938	22.6284	23.1117	22.6885	22.1397	22.3851
Glyma.06G063400.1	S23	1	Cold	StatsSet	25.1256	25.181	25.0843	25.1375	25.2858	25.1256	25.4447	25.3643	25.2538	25.369	24.7148	4.33e-06	2.21e-06	25.0121	24.8336	25.531	0	25.1799	25.1106	25.2525	0	24.1886	25.7962	25.2681	0	24.6402	25.3456	25.4268	0	25.0669	25.339	25.4513	0	24.9117	25.8107	24.6543	0	25.1607	25.4399	25.7334	0	25.0936	25.6946	25.3045	0
Glyma.06G063400.1	S23	1	Control	StatsSet	25.6737	25.8233	25.9988	25.9012	25.4759	25.6275	25.8834	25.7461	25.5949	25.8378	25.9225	4.33e-06	2.21e-06	24.928	25.9734	26.1199	0	25.4122	26.1023	25.9552	0	25.8596	25.756	26.3808	0	25.1333	26.6451	25.9253	0	25.1054	25.9134	25.409	0	24.9369	26.114	25.8317	0	24.8461	25.8838	26.9204	0	25.0609	25.9617	26.2158	0
Glyma.06G119700.1	S292	1	Cold	StatsSet	27.4048	27.4522	27.373	27.33	27.4354	27.241	27.5703	27.3852	27.2498	27.6579	27.2017	0.0374566	0.00980502	26.8569	27.0947	27.3117	28.3558	26.3751	26.9956	27.5314	28.9067	25.6433	27.426	27.7123	28.7104	26.4808	26.9642	27.4208	28.4542	26.6824	27.4528	27.918	27.6884	26.2571	27.1215	27.3303	28.2552	26.6703	27.5424	27.7303	28.3383	26.8577	27.118	27.6097	27.9554
Glyma.06G119700.1	S292	1	Control	StatsSet	27.0191	27.2893	27.5262	27.143	26.7786	27.3105	26.9368	27.1587	27.1403	27.4597	27.3385	0.0374566	0.00980502	25.9877	27.5843	27.4711	27.0332	26.7464	27.3858	27.9806	27.0445	27.1853	27.4319	28.1313	27.3563	26.9044	27.6338	27.0089	27.0249	26.5665	27.2585	26.2268	27.0625	26.4702	27.2509	27.8853	27.6356	26.4232	27.383	26.7357	27.2052	26.1966	27.5442	27.7903	27.1037
Glyma.06G127600.1	S1132	1	Cold	StatsSet	25.3395	25.2236	25.2359	25.0705	25.5287	25.2341	25.2382	25.1942	25.3614	25.1557	25.3368	0.0258823	0.00693654	25.6711	25.0702	25.2773	0	25.9783	24.9323	24.7603	0	25.9893	24.6416	25.0768	0	25.5917	24.5966	25.0231	0	26.1984	25.1016	25.286	0	25.6187	24.5972	25.4863	0	25.527	25.0076	25.1799	0	25.6064	24.871	25.1053	0
Glyma.06G127600.1	S1132	1	Control	StatsSet	25.1048	25.1394	25.2834	24.843	25.3977	25.0341	24.9206	25.1606	25.0869	25.1508	25.3382	0.0258823	0.00693654	25.6888	24.7623	24.8631	0	25.5256	24.7192	25.1734	0	25.4725	25.087	25.2907	0	25.4351	24.0853	25.0086	0	25.6638	25.1845	25.3448	0	25.541	24.7634	24.7979	0	25.4562	24.7731	24.5325	0	25.5204	25.2055	24.7558	0
Glyma.06G137000.1	S112	1	Cold	StatsSet	20.7764	21.4331	20.9038	20.4177	19.8902	20.0875	20.1238	20.2394	19.8595	20.3184	21.1512	2.07e-40	1.4e-38	20.9672	20.2212	20.8981	21.0192	21.9698	21.6762	21.0381	21.0482	21.9483	20.3366	0	20.4264	20.6449	20.3238	20.2032	20.4989	20.4151	19.7349	19.614	19.797	21.4924	19.4661	19.6931	19.6983	21.2759	19.1859	0	19.9095	20.6692	20.4579	0	19.5912
Glyma.06G137000.1	S112	1	Control	StatsSet	24.507	24.1144	23.6765	24.2547	24.7048	23.8816	23.8962	24.245	23.6422	24.3299	23.7727	2.07e-40	1.4e-38	25.5116	23.6785	24.3962	24.4416	24.723	23.4899	23.5493	24.6954	23.2007	22.8855	23.4907	25.1289	25.2607	23.0417	23.8717	24.8447	25.4343	23.9314	24.6987	24.7549	24.3025	23.0595	23.5952	24.5691	24.6608	23.6072	23.1811	24.1358	25.0746	23.5032	24.1569	24.2451
Glyma.06G148800.1	S146	1	Cold	StatsSet	24.7087	24.3132	24.8391	24.7264	24.3779	24.9176	24.0057	23.8458	24.1735	24.4433	24.6973	0.00698785	0.00204302	25.8242	24.2809	24.0212	0	25.2147	23.5791	24.1459	0	26.3086	24.4102	23.7984	0	25.8843	24.4132	23.8815	0	25.685	23.5611	23.8877	0	25.303	24.7715	24.6783	0	24.0304	24.0554	23.9314	0	23.2276	24.0723	24.2375	0
Glyma.06G148800.1	S146	1	Control	StatsSet	24.973	24.6828	24.7773	24.8119	24.9515	25.0946	24.5184	25.0225	24.5092	25.3353	24.794	0.00698785	0.00204302	24.9812	25.1691	24.7687	0	24.6521	24.6168	24.7795	0	24.2941	25.2548	24.7829	0	24.9018	24.8665	24.6674	0	24.8386	24.6698	25.346	0	24.7038	25.519	25.0611	0	24.3865	24.9194	24.2493	0	25.0087	25.0233	25.0356	0
Glyma.06G159200.1	S566	1	Cold	StatsSet	24.4777	24.4345	24.3934	24.6083	24.3738	24.4968	24.6026	24.7464	24.7401	24.7712	24.5024	1.85e-11	2.91e-11	24.3064	24.2995	24.4531	24.8519	24.0566	24.0562	24.6417	24.9836	24.2322	24.2896	24.2856	24.7662	24.2639	24.5833	24.7706	24.8155	24.129	24.339	24.4812	24.546	24.5496	24.2601	24.321	24.8566	24.7277	24.4234	24.6519	24.6073	24.5659	24.448	25.0609	24.9109
Glyma.06G159200.1	S566	1	Control	StatsSet	24.2101	24.1733	24.0436	23.9973	23.975	24.4517	24.2947	24.2625	24.1415	24.2736	23.9897	1.85e-11	2.91e-11	24.0429	24.1788	24.4381	24.1806	23.8077	24.0487	24.3352	24.5017	24.1163	23.8345	24.5347	23.6889	23.6495	23.9662	24.4701	23.9036	23.7629	24.2078	23.5698	24.3597	24.086	24.216	24.8726	24.6322	24.1252	23.9085	24.922	24.2229	24.1018	24.2751	24.2084	24.4645
Glyma.06G161200.1	S496	1	Cold	StatsSet	25.3937	25.3016	25.1758	24.8455	25.2519	25.3363	25.3244	25.2517	25.2139	25.5246	24.9672	0.000962943	0.000311168	24.721	24.7765	25.9284	26.1491	25.9011	24.6289	24.2771	26.3991	25.1384	24.9288	25.013	25.6229	24.8777	24.2596	24.4455	25.7991	25.5299	24.6712	25.0091	25.7974	25.1606	24.8563	24.9162	26.4119	25.5575	24.3513	25.5287	25.8601	25.9001	24.301	25.0359	25.7699
Glyma.06G161200.1	S496	1	Control	StatsSet	25.542	25.3809	25.5955	25.6454	25.5079	25.8204	25.8042	25.7533	25.7265	25.3799	25.7367	0.000962943	0.000311168	26.4759	25.5107	25.4085	24.7729	25.5472	25.4806	25.6663	24.8294	26.185	25.1474	25.8255	25.2241	26.0058	25.6354	25.6237	25.3166	26.1731	25.6206	25.1608	25.0772	26.4428	26.0668	25.3955	25.3764	25.7627	25.224	26.3671	25.8629	26.5006	25.2455	25.3408	25.9263
Glyma.06G162500.1	S973	1	Cold	StatsSet	25.4696	25.7904	25.7108	25.2433	25.625	25.6319	25.8064	25.834	25.7077	25.6618	25.2573	0.710236	0.140255	24.7344	24.3971	26.5145	26.2324	25.2533	25.3379	26.1006	26.4696	25.2538	24.4446	26.4186	26.7262	24.887	21.5929	27.7326	26.7607	25.788	25.1234	25.242	26.3468	25.2035	24.2077	27.024	26.0923	25.6104	24.6585	27.0675	25.8891	25.7378	24.4595	26.8049	26.3339
Glyma.06G162500.1	S973	1	Control	StatsSet	23.9934	25.675	25.557	25.5033	26.1378	25.3145	26.4264	25.5327	25.712	25.2581	25.8623	0.710236	0.140255	25.0689	19.4454	26.4645	24.9947	25.0537	25.627	26.9968	25.0224	24.223	25.3655	27.2465	25.3932	25.6018	24.7286	26.755	24.9275	25.6298	26.2335	27.2822	25.406	25.4391	24.1063	26.4603	25.2524	26.4031	24.8939	27.8617	26.5469	25.8176	24.2602	26.4408	25.6121
Glyma.06G182100.1	S297	1	Cold	StatsSet	24.287	24.1562	23.7675	24.346	24.3221	24.3183	24.2172	24.1496	24.3421	24.35	24.4181	0.000512016	0.000174646	24.0281	24.7072	24.1256	0	23.2436	24.357	24.868	0	22.0514	24.4253	24.826	0	23.8193	24.7478	24.4708	0	23.9038	24.5136	24.5489	0	23.6449	24.3757	24.9342	0	23.4773	24.5747	24.5997	0	23.2568	24.1014	25.0905	0
Glyma.06G182100.1	S297	1	Control	StatsSet	24.1295	24.1662	23.8537	23.5371	23.6338	24.0587	23.8729	23.8118	23.8619	24.0848	23.384	0.000512016	0.000174646	23.6017	24.3356	24.4511	0	24.1545	23.7262	24.6179	0	23.2715	23.9775	24.3122	0	23.0601	23.8053	23.7459	0	23.5884	23.8026	23.5105	0	24.0389	23.8418	24.2956	0	23.8436	23.7616	24.0135	0	23.4314	24.1788	23.8252	0
Glyma.06G187600.1	S61	1	Cold	StatsSet	23.6107	23.1958	23.6124	23.397	23.6486	23.6082	23.3305	23.2993	23.2337	23.564	23.6223	0.00770678	0.00222432	23.4533	23.5262	23.6443	23.8188	23.0386	23.3657	23.1831	0	23.5853	23.7848	23.467	0	23.3984	23.5978	23.2316	23.3603	23.57	23.7649	23.6229	23.6366	23.3397	23.6608	23.7878	23.6446	22.7472	23.6355	23.6087	0	22.8667	23.3302	23.5838	23.4167
Glyma.06G187600.1	S61	1	Control	StatsSet	23.7587	23.2793	23.5887	23.8721	23.5372	23.6701	23.6375	23.7914	23.7087	23.8861	23.4457	0.00770678	0.00222432	24.191	23.7518	23.5129	23.5791	23.2724	23.2962	23.3597	23.1889	23.7683	23.6179	23.1815	23.7869	24.0257	23.7642	23.7426	23.9558	23.9051	23.5186	23.025	23.7	23.7854	23.5049	23.9397	23.4505	23.4529	23.594	23.7666	23.7365	24.0601	23.5095	23.7331	23.8627
Glyma.06G189900.1	T955	1	Cold	StatsSet	27.069	26.614	26.9545	27.1585	27.1807	27.6131	27.5098	27.5623	27.6214	27.5053	26.9536	0.00329887	0.00100812	26.0757	27.9592	27.1721	0	25.9845	26.6604	27.1973	0	26.3852	27.6371	26.8413	0	26.8451	27.1544	27.4758	0	26.536	27.519	27.487	0	27.145	27.7656	27.9288	0	27.3615	27.4789	27.6891	0	27.7459	27.0881	27.8528	0
Glyma.06G189900.1	T955	1	Control	StatsSet	26.9199	26.745	26.937	27.0888	26.0676	27.5453	27.0654	27.0329	27.1914	27.4137	26.8217	0.00329887	0.00100812	26.5292	26.6944	27.5361	0	26.0143	26.8709	27.3497	0	26.6375	26.7136	27.46	0	26.7241	27.2149	27.3275	0	25.7821	26.1213	26.2993	0	27.393	27.5097	27.7331	0	27.0703	26.6697	27.4562	0	26.9925	26.5386	27.5675	0
Glyma.06G202100.1	S231	1	Cold	StatsSet	26.1397	26.0679	26.3415	26.1178	26.034	25.8692	26.1897	26.3126	26.2362	26.1458	25.7461	1.32e-06	7.42e-07	25.2415	25.8507	26.2649	27.2017	24.781	25.7255	26.3101	27.455	24.8199	26.5325	26.7186	27.295	24.7626	26.1764	26.1278	27.4043	24.9693	26.335	26.535	26.2966	24.4074	26.2708	26.3961	26.4023	24.3491	26.2181	26.8152	27.3764	24.6713	26.724	26.9467	26.9082
Glyma.06G202100.1	S231	1	Control	StatsSet	25.4232	25.3281	25.3789	25.0797	25.0802	25.5	24.7206	25.4878	25.6347	25.6367	25.3762	1.32e-06	7.42e-07	25.1909	25.8542	25.607	25.0408	25.1486	25.2858	25.8011	25.0768	0	25.2987	25.4835	25.3545	24.7905	25.7999	24.5492	25.1794	25.6334	25.876	23.6697	25.1414	25.3053	25.4424	25.3294	25.9231	24.6278	25.5544	23.5447	25.1556	25.9461	25.5131	25.3079	25.1843
Glyma.06G216700.1	S45	1	Cold	StatsSet	24.8457	24.756	25.2831	24.9935	24.6904	24.8356	24.4508	24.7411	25.0105	24.9469	24.3067	3.35e-08	2.54e-08	24.8189	24.7819	24.5757	25.2063	22.8068	24.526	25.6137	26.0777	24.1439	25.1529	25.8728	25.9627	24.9292	24.092	25.5086	25.4442	23.5009	24.753	25.6984	24.8095	24.5769	23.4356	25.5459	25.7842	22.2048	25.3729	25.7747	0	23.2452	25.6729	25.3053	0
Glyma.06G216700.1	S45	1	Control	StatsSet	23.3454	24.0634	24.0657	23.9321	22.9538	24.5882	24.0502	23.8309	24.1238	23.1313	23.2547	3.35e-08	2.54e-08	22.9515	23.1883	22.882	24.3599	24.6518	23.3391	23.6858	24.5768	22.9258	23.6708	23.8843	25.7819	23.8177	23.5995	23.9278	24.3834	0	22.8783	21.8653	24.1178	24.9966	24.1294	24.2939	24.933	24.3325	23.815	23.8963	24.1572	23.3925	23.6582	23.9447	24.328
Glyma.06G223500.1	S1627	1	Cold	StatsSet	28.1552	27.8856	28.0769	28.2825	28.17	28.3068	28.206	28.147	28.1113	28.0605	28.1237	2.45e-16	9.73e-16	26.4186	28.402	28.8465	28.9537	25.1274	28.1707	29.073	29.1714	25.4906	28.4822	29.1836	29.151	26.2506	28.2472	29.3718	29.2602	25.8655	28.523	29.6915	28.6002	25.7635	28.438	29.7471	29.2787	25.6108	28.0727	29.3546	29.7859	25.6449	28.0453	29.6219	29.276
Glyma.06G223500.1	S1627	1	Control	StatsSet	27.018	27.0693	26.9671	26.9369	26.4148	26.9896	26.8066	26.8708	27.2355	27.1951	26.9189	2.45e-16	9.73e-16	24.927	27.2342	28.2168	27.6937	25.6592	26.387	28.1627	28.0684	25.1101	26.8646	27.9042	27.9894	25.3926	27.002	27.5866	27.7665	25.3148	26.5277	26.7969	27.0198	25.8129	26.6142	28.2074	27.324	25.3351	26.7747	27.9602	27.1564	25.4957	26.7989	27.7301	27.4585
Glyma.06G223500.1	S1678	1	Cold	StatsSet	28.8741	28.6188	28.791	28.8114	28.9451	28.9894	26.8736	28.7997	28.7631	28.6028	28.8743	0.14944	0.0338681	28.6868	29.2368	28.6987	0	28.569	28.8557	28.4316	0	28.6776	29.0801	28.6152	0	28.8599	28.771	28.8032	0	29.1416	28.8391	28.8546	0	28.9783	28.9768	29.013	0	28.937	22.9225	28.7612	0	28.7151	28.8628	28.8211	0
Glyma.06G223500.1	S1678	1	Control	StatsSet	28.619	26.5969	28.7307	28.5043	28.5183	26.4968	28.4683	28.3233	28.5176	28.4877	28.3228	0.14944	0.0338681	28.377	28.8346	28.6454	0	28.4243	28.6022	22.7642	0	28.7844	28.7337	28.6739	0	28.4624	28.4378	28.6127	0	28.2034	28.9371	28.4143	0	22.0935	29.0141	28.3829	0	28.3139	28.6793	28.4115	0	28.0579	28.5032	28.4088	0
Glyma.06G300800.1	S107	1	Cold	StatsSet	23.9385	23.5932	23.8673	23.8848	24.1181	23.8429	23.9285	23.7645	23.4288	22.9027	23.9304	8.25e-07	4.76e-07	24.8044	23.8591	24.0649	23.0255	23.9933	23.7518	23.6778	22.9497	24.6418	23.4739	24.0005	23.3529	24.2817	23.7433	23.6294	0	24.7448	23.5129	24.0968	0	24.2658	23.6113	23.6515	0	24.2243	23.5291	24.0319	0	23.8929	23.7018	23.6988	0
Glyma.06G300800.1	S107	1	Control	StatsSet	24.4894	24.4155	24.3289	24.4386	24.5171	24.012	24.1574	24.2336	24.0782	24.2302	24.1384	8.25e-07	4.76e-07	24.4768	24.4719	24.224	24.7849	24.6369	24.2925	23.8417	24.8912	24.1611	24.4531	23.5678	25.1335	24.6273	24.0766	24.1141	24.9363	24.0996	24.5461	25.0522	24.3707	24.0097	23.7357	23.9042	24.3984	24.2104	24.1409	23.8455	24.4328	24.023	24.0714	24.7166	24.1232
Glyma.06G300800.1	S208	1	Cold	StatsSet	22.8184	22.7412	22.8922	22.844	22.6708	23.0226	22.8928	22.8713	22.9014	23.0593	22.7911	2.66e-12	5.13e-12	24.1637	22.624	22.4119	22.074	24.3552	21.9171	21.9468	22.7456	24.7919	22.283	22.081	22.413	24.492	22.7193	21.6581	22.5068	24.1086	21.8958	21.9009	22.7779	24.4911	22.9916	21.9465	22.6613	23.909	22.8534	21.942	22.867	24.2053	23.1189	21.5854	22.5755
Glyma.06G300800.1	S208	1	Control	StatsSet	23.9319	23.6059	23.8635	23.9222	24.2272	23.9375	23.6753	24.1421	23.9149	23.9054	23.519	2.66e-12	5.13e-12	24.1508	24.3454	23.2169	24.0146	23.9926	23.5491	22.807	24.075	23.9733	24.056	23.0312	24.3934	24.2319	23.8439	23.797	23.816	24.2535	23.2251	24.9598	24.4704	24.691	23.3196	23.3989	24.3405	24.0372	23.4018	22.8234	24.4388	24.3432	24.4586	23.3738	24.3926
Glyma.07G003600.1	S750	1	Cold	StatsSet	25.353	25.2505	25.3427	25.5469	25.268	25.4191	25.2464	25.2723	25.1948	25.4037	25.2941	1.66e-26	5.62e-25	24.4286	25.8669	25.4453	25.6711	24.3263	25.7005	25.3379	25.6371	24.3794	25.6347	25.4411	25.9156	24.832	25.6792	25.872	25.8044	24.6414	25.5725	25.6784	25.1795	24.6203	25.4739	25.8781	25.7042	24.615	25.1285	25.5746	25.6675	24.4198	25.0329	25.7851	25.8515
Glyma.07G003600.1	S750	1	Control	StatsSet	24.2882	24.2946	24.5321	24.0385	24.1428	23.9875	24.4378	24.0974	24.1246	24.6107	24.2129	1.66e-26	5.62e-25	23.0646	24.7099	24.9255	24.4527	23.3877	24.4961	24.7705	24.5242	23.9607	24.5541	25.1424	24.4711	23.6222	0	24.3808	24.1126	23.6724	24.7536	23.9973	24.148	23.247	24.5777	24.0081	24.117	23.8193	24.5858	25.209	24.1371	23.116	24.5826	24.3446	24.3464
Glyma.07G042700.1	S15	1	Cold	StatsSet	26.4658	26.1145	26.1376	26.387	26.5738	26.5077	26.5317	26.334	26.4798	26.7259	26.2287	4.45e-17	2e-16	24.8788	26.658	27.2504	27.0759	24.5309	26.3272	26.4609	27.139	24.4122	26.7476	26.3981	26.9927	25.4235	26.3877	26.6257	27.1112	25.4107	26.7501	27.0125	27.122	25.0078	26.5721	27.2357	27.215	25.0088	26.5576	26.9952	27.5652	24.4717	26.545	27.1613	27.1582
Glyma.07G042700.1	S15	1	Control	StatsSet	24.8817	24.8251	24.8443	24.386	24.0561	25.3336	24.7519	25.154	25.413	25.3725	24.8771	4.45e-17	2e-16	0	24.9611	25.2385	24.4454	24.649	24.5495	25.3382	24.7637	0	24.7634	25.1331	24.6364	22.0079	25.3769	24.6054	25.5537	23.2884	24.5988	23.7919	24.5454	25.5084	24.7979	25.7649	25.2633	24.1195	25.246	24.9998	24.6425	24.8931	24.994	25.4136	25.3151
Glyma.07G046500.1	S24	1	Cold	StatsSet	25.4281	24.9658	25.2135	25.191	25.4253	25.4431	25.3911	25.274	25.4575	25.3179	25.3562	1.21e-09	1.26e-09	25.2718	25.2513	25.8811	25.3082	24.833	24.8522	24.841	25.3368	25.3905	24.8958	25.1612	25.4062	25.0005	24.9828	25.2641	25.5165	25.9949	24.9289	25.0293	25.7482	25.2344	24.9917	25.6167	25.9296	25.5785	25.3102	25.5151	25.1605	25.3951	25.2106	25.4476	25.0429
Glyma.07G046500.1	S24	1	Control	StatsSet	24.7944	24.7361	25.0371	24.6878	24.79	25.0345	24.9973	24.689	24.9634	24.9374	25.0209	1.21e-09	1.26e-09	25.3364	24.5485	24.4299	24.8629	24.8574	24.9783	24.4506	24.658	0	24.623	25.317	25.1713	24.8964	24.5483	24.3002	25.0062	24.8026	24.7363	24.5817	25.0394	24.9873	25.3683	24.5734	25.2092	25.1689	24.6669	24.9795	25.174	24.9402	24.6227	24.4508	24.7425
Glyma.07G046800.1	S364	1	Cold	StatsSet	25.1384	25.5691	25.2703	25.2467	25.7826	25.7447	25.3813	25.4712	25.6909	25.6768	25.6174	7.26e-05	2.8e-05	27.2218	26.998	19.808	26.5257	27.7845	27.2015	20.6367	26.6538	27.1528	26.9353	20.1354	26.8578	27.415	26.7599	19.8528	26.9592	28.1912	27.1895	20.336	27.4139	27.5274	27.0693	21.3567	27.0252	27.8757	27.2701	20.1207	26.2587	27.4887	27.0518	21.0114	26.3329
Glyma.07G046800.1	S364	1	Control	StatsSet	25.9448	26.2336	26.1374	25.9918	26.6477	26.2902	25.5993	25.9554	26.0305	26.092	26.038	7.26e-05	2.8e-05	27.7294	26.2805	22.1551	27.6141	27.3335	26.9569	22.9363	27.7075	27.7932	26.7709	22.1114	27.8738	27.311	27.214	21.8006	27.6416	27.4555	26.7692	24.4345	27.9317	27.7016	27.5467	22.0591	27.8534	27.4473	26.7086	20.5852	27.6559	27.5888	26.6956	22.4911	27.046
Glyma.07G051000.1	S321	1	Cold	StatsSet	25.0293	24.8609	24.5381	25.046	24.6375	24.774	25.0149	24.8651	24.9914	25.0218	24.9751	0.754365	0.147247	24.4073	25.0923	24.707	25.9104	24.269	24.5331	25.4784	25.1631	22.3352	24.8839	25.2199	25.7134	24.7639	25.1155	24.8739	25.4307	24.3255	24.6744	24.8268	24.7231	24.305	25.1605	24.2202	25.4103	25.2357	24.6957	24.8768	25.2513	24.7035	24.8784	24.8577	25.0207
Glyma.07G051000.1	S321	1	Control	StatsSet	24.0699	24.8385	25.1367	24.7767	24.5018	24.9536	25.2275	25.0998	24.8983	25.1571	24.8313	0.754365	0.147247	21.8783	24.911	24.8458	24.6444	24.9075	24.2596	25.2471	24.9397	25.0382	24.9373	25.11	25.4616	25.3603	24.9683	24.0783	24.6997	23.7399	25.1932	24.0776	24.9963	25.0491	24.5987	24.9468	25.2199	24.7819	25.4209	25.9598	24.7474	0	25.2723	25.1749	24.8522
Glyma.07G053200.1	S173	1	Cold	StatsSet	26.2369	26.3239	26.128	26.2204	26.2663	26.4726	26.5219	26.5763	26.9265	27.1142	25.9779	0.810307	0.155913	24.9993	25.493	26.9525	27.5028	26.095	26.2037	25.6835	27.3133	25.9433	25.696	25.9241	26.9485	25.6147	25.7639	0	27.2824	25.8883	26.0609	25.8419	27.2742	25.8495	26.0295	0	27.5387	26.7302	26.0332	26.5899	26.7341	27.2269	26.371	0	26.131
Glyma.07G053200.1	S173	1	Control	StatsSet	26.1967	26.2919	26.1374	26.5376	26.1361	26.6227	26.6661	26.811	27.1504	26.0369	26.9081	0.810307	0.155913	26.8741	25.6692	26.3474	25.8962	26.0913	26.0188	26.597	26.4606	25.7768	25.1779	26.6174	26.9772	25.9293	26.8746	26.7471	26.5994	26.5826	24.9595	0	26.8662	26.6441	26.404	26.4835	26.9594	26.5812	25.8593	27.25	26.9737	27.1698	26.5124	26.4018	27.1602
Glyma.07G053200.1	S183	2	Cold	StatsSet	22.29	21.353	21.3806	22.6537	22.4681	21.4516	22.5066	22.6924	21.3818	22.1746	22.0766	0.118456	0.0275866	23.5373	21.4827	21.8501	0	24.0735	21.7603	22.3387	17.2397	24.0842	21.931	21.675	17.8322	23.5056	22.5702	21.8854	0	23.5218	22.0775	21.805	0	23.4175	22.5433	22.0144	17.8312	23.144	22.6283	21.7475	0	23.085	22.9239	22.0683	0
Glyma.07G053200.1	S183	2	Control	StatsSet	22.0903	22.4448	20.8764	22.7965	23.5859	21.0059	22.5951	22.8294	22.768	22.6834	22.321	0.118456	0.0275866	21.7924	22.2585	0	22.2201	22.6676	22.3892	22.4076	22.3147	22.3993	23.0496	22.129	15.9276	22.4652	22.7945	23.141	22.7853	22.4784	22.6782	25.8438	23.3434	22.1831	22.5498	22.5951	16.6957	22.1058	22.6425	22.0101	23.6221	21.8897	23.1735	22.8888	23.3656
Glyma.07G055900.1	S1727	1	Cold	StatsSet	25.2061	25.1686	25.4815	24.9156	24.9536	25.0049	25.0719	24.8855	24.7974	25.0099	25.4107	0.000116716	4.38e-05	24.9172	24.8721	25.3182	25.717	25.0042	25.4166	24.7614	25.4922	25.3998	25.2839	25.5096	25.7329	24.682	25.0691	24.64	25.2711	24.789	25.1097	24.7599	25.1557	24.7199	25.192	24.5473	25.5605	24.9658	24.8787	24.9302	25.513	24.5757	24.7158	25.1447	25.1059
Glyma.07G055900.1	S1727	1	Control	StatsSet	25.4608	25.3845	25.369	25.4512	25.1127	25.1951	25.3171	25.2942	25.0927	25.183	25.4252	0.000116716	4.38e-05	25.3385	25.4195	25.4472	25.6379	25.1209	25.3411	25.2157	25.8603	25.4016	25.093	24.9131	26.0686	25.2976	25.5966	25.1402	25.7706	25.2503	25.2898	24.7871	25.1234	25.1813	25.1091	25.1696	25.3202	25.4307	25.5579	25.1607	25.119	25.2936	25.0234	25.5435	25.3163
Glyma.07G070900.1	S165	2	Cold	StatsSet	25.5628	26.1064	25.8189	25.4925	25.7899	25.7017	23.7258	25.5582	25.6073	25.576	25.9786	0.0387246	0.0100204	25.1248	25.6456	25.9181	0	25.877	26.3234	26.1188	0	25.504	26.0166	25.9361	0	25.118	25.6632	25.6964	0	25.9	25.9497	25.52	0	25.3842	25.7708	25.9501	0	19.9996	25.4865	25.6912	0	25.511	25.497	25.6665	0
Glyma.07G070900.1	S165	2	Control	StatsSet	25.2791	25.3557	25.0794	25.3463	25.501	25.3521	25.3376	25.2594	23.3342	23.4063	25.6973	0.0387246	0.0100204	25.5543	24.7053	25.5777	0	25.1334	25.2189	25.7148	0	24.8405	24.4993	25.8985	0	25.4142	25.3714	25.2532	0	25.4479	25.5488	25.5063	0	25.1846	25.5536	25.3181	0	25.6941	25.1324	25.1864	0	25.3658	25.0052	25.4072	0
Glyma.07G070900.1	S180	2	Cold	StatsSet	25.5628	26.1064	25.8189	25.4925	25.7899	25.7017	23.7258	25.5582	25.6073	25.576	25.7136	0.0365126	0.0096326	25.1248	25.6456	25.9181	0	25.877	26.3234	26.1188	0	25.504	26.0166	25.9361	0	25.118	25.6632	25.6964	0	25.9	25.9497	25.52	0	25.3842	25.7708	25.9501	0	19.9996	25.4865	25.6912	0	25.511	25.497	25.6665	0
Glyma.07G070900.1	S180	2	Control	StatsSet	25.1437	25.3222	25.1236	25.2671	25.2315	25.3521	25.1236	25.0283	23.6305	23.4063	25.5343	0.0365126	0.0096326	25.5543	24.7053	25.5777	24.7375	25.1334	25.2189	25.7148	25.2217	24.8405	24.4993	25.8985	25.2562	25.4142	25.3714	25.2532	25.0294	25.4479	25.5488	25.5063	24.4229	25.1846	25.5536	25.3181	0	25.6941	25.1324	25.1864	24.4813	25.3658	25.0052	25.4072	24.3349
Glyma.07G072100.1	T24	1	Cold	StatsSet	23.9563	23.9117	23.9369	24.1897	24.1591	24.0772	24.3179	24.4662	24.3003	24.3477	24.8713	8.4e-06	3.94e-06	22.492	25.184	25.1213	23.0277	21.9429	24.7823	25.01	0	20.8798	25.3998	24.8183	24.6495	22.4359	25.3925	24.7408	0	22.6153	24.7891	25.073	0	22.0952	25.1998	24.9366	0	22.5903	25.0265	25.337	0	22.7211	24.9493	25.2506	24.9438
Glyma.07G072100.1	T24	1	Control	StatsSet	23.3129	23.5078	23.0915	23.5945	22.9109	24.2355	23.324	23.5277	23.9559	23.8708	23.216	8.4e-06	3.94e-06	22.4645	23.7094	24.3055	22.772	22.6225	23.443	24.3157	23.6501	23.0878	23.5071	24.0941	21.6771	22.6445	24.242	24.0914	23.3999	22.2891	23.3778	23.0659	0	23.6922	24.239	24.8977	24.1132	22.3815	23.5832	24.3844	22.9467	22.8042	23.5305	24.2777	23.4985
Glyma.07G078300.1	S207	1	Cold	UniqueSet	23.9498	23.89	24.4016	23.8776	24.0917	24.0839	23.5212	24.1395	0	24.3818	23.8798	NA	NA	25.4514	23.5185	23.2837	23.5456	25.4937	23.8438	22.82	23.4026	25.7502	24.1428	0	23.3118	25.0631	24.4187	22.6072	23.4213	25.4945	24.3128	22.8313	23.7283	24.8856	24.2673	23.0987	0	0	24.5081	22.8679	23.1877	25.1576	24.5069	22.7541	0
Glyma.07G078300.1	S207	1	Control	UniqueSet	24.4464	24.3492	24.6095	24.6987	25.4586	24.9274	25.0609	25.2239	24.6913	24.7461	24.6366	NA	NA	25.3246	24.2063	23.69	24.5648	0	24.8352	23.5602	24.6523	0	24.9425	23.7465	25.1395	25.4796	24.5668	24.0492	24.6991	25.8478	24.672	25.7973	25.5173	24.8849	24.7069	0	25.1903	24.9552	24.8603	0	25.3672	24.956	25.2999	0	25.4159
Glyma.07G090300.1	S469	1	Cold	StatsSet	22.5808	22.1983	22.3255	22.6627	22.9584	22.974	23.4981	23.2502	23.3854	23.5524	21.8454	3.62e-10	4.07e-10	22.4403	22.5049	22.7971	0	21.5793	22.4776	22.538	0	22.5632	22.4986	21.9149	0	22.5173	22.5164	22.9545	0	23.0039	22.6905	23.1808	0	22.7112	23.3006	22.9102	0	23.3921	23.4642	23.6381	0	23.3326	23.1239	23.2942	0
Glyma.07G090300.1	S469	1	Control	StatsSet	21.6513	21.9737	22.0556	22.2244	21.892	22.5968	22.3616	22.4075	22.6687	22.6303	22.2195	3.62e-10	4.07e-10	21.4299	21.3114	22.2127	0	21.7624	21.9633	22.1953	0	21.9431	21.814	22.4096	0	21.7032	22.364	22.6059	0	21.7512	22.0732	21.8516	0	22.5527	22.9233	22.3142	0	21.9152	22.3741	22.7956	0	22.2399	21.9778	23.0049	0
Glyma.07G121300.1	S284	1	Cold	StatsSet	20.8233	21.1338	21.2839	20.9899	20.7925	20.95	21.2365	21.1963	21.0242	20.8769	20.7821	6.98e-09	6.21e-09	21.6717	20.3808	20.44	20.8007	22.0353	20.9842	20.7984	20.7174	22.3025	20.8443	0	20.705	22.0513	20.8511	20.6346	20.4225	21.4187	20.7375	0	20.2213	22.2355	20.6353	20.5777	20.3517	22.5534	20.6695	0	20.4865	22.501	21.1624	20.5882	20.5335
Glyma.07G121300.1	S284	1	Control	StatsSet	21.7208	21.9366	21.1691	22.0429	22.2651	22.108	21.73	21.9463	21.94	21.9527	21.9093	6.98e-09	6.21e-09	22.2923	21.1511	21.4319	22.0078	22.4062	21.6444	21.0365	22.6593	22.3769	21.7045	17.7988	22.796	22.6222	21.5218	21.5781	22.4495	22.4749	22.1121	22.2257	22.2479	22.6526	21.9734	21.6	22.2059	22.3967	22.2618	0	20.5316	22.3617	21.5398	21.8678	22.0158
Glyma.07G180000.1	S80	1	Cold	StatsSet	23.5064	23.1412	24.1954	24.0079	21.9054	23.2613	22.9451	22.9346	23.314	23.412	23.773	6.67e-13	1.46e-12	23.919	23.5268	22.1113	24.4686	23.1119	22.6479	22.9077	23.8975	24.4685	23.7362	0	24.3815	23.8583	23.881	0	24.2844	23.5423	22.5869	19.5871	0	23.1841	23.4247	23.1752	0	22.0799	23.615	22.2974	23.7879	21.5161	23.5979	23.0507	23.5738
Glyma.07G180000.1	S80	1	Control	StatsSet	24.5071	24.6812	24.8123	24.2712	25.23	24.1883	24.3347	24.4563	24.2255	24.849	24.1456	6.67e-13	1.46e-12	24.2668	25.3006	23.4651	24.9962	24.1514	24.9937	24.2105	25.3692	0	25.3648	23.423	25.6489	24.5324	23.6499	23.488	25.4145	24.9094	25.0331	25.2884	25.6891	23.4256	24.2171	23.6544	25.4562	24.3583	24.8481	22.6052	25.5275	24.1858	24.8807	23.5769	25.1819
Glyma.07G202100.1	S976	1	Cold	StatsSet	24.7081	25.3712	25.0641	25.3075	24.6714	25.3981	25.4134	25.6576	25.5262	25.5938	24.9505	0.189865	0.0420422	23.7934	24.6974	25.6335	0	24.5712	25.7531	25.7894	0	24.1235	25.3791	25.6897	0	24.1514	25.7158	26.0554	0	24.0205	26.1786	23.8149	0	24.3514	26.1713	25.6716	0	23.8994	26.4558	25.8849	0	24.7849	26.3352	25.8526	0
Glyma.07G202100.1	S976	1	Control	StatsSet	24.8342	24.9044	25.5262	24.8524	25.1172	24.8743	25.52	24.8359	25.0382	24.7764	25.2417	0.189865	0.0420422	24.1897	25.6755	24.6373	0	24.1858	25.3998	25.1277	0	25.4946	25.8173	25.2667	0	24.1025	25.2022	25.2525	0	24.7308	25.468	25.1527	0	25.3842	23.971	25.2677	0	25.7821	25.0684	25.7097	0	25.1034	25.0975	24.3068	0
Glyma.07G224200.1	S184	2	Cold	StatsSet	24.7317	25.3523	25.0381	25.2486	24.6607	25.2423	25.5622	25.4149	25.4666	25.7334	24.6691	0.0943581	0.0224389	24.1339	24.8377	25.2234	0	24.5837	25.3111	26.162	0	24.2091	24.9787	25.9265	0	24.1854	25.4677	26.0928	0	24.7064	25.9919	23.2838	0	24.4976	25.7855	25.4439	0	24.7066	25.9769	26.003	0	25.103	25.7649	25.3768	0
Glyma.07G224200.1	S184	2	Control	StatsSet	24.6982	25.2067	25.2436	24.6933	24.839	24.7257	25.6292	24.9896	24.9043	24.3314	25.283	0.0943581	0.0224389	23.9181	25.1497	25.0269	0	24.6288	25.4009	25.5903	0	24.7465	25.4283	25.556	0	24.1182	25.2318	24.73	0	24.5401	25.4323	24.5447	0	25.0644	23.8226	25.2901	0	25.8794	24.7683	26.24	0	24.9231	25.289	24.7566	0
Glyma.07G224200.1	S186	2	Cold	StatsSet	24.7317	25.3523	25.0381	25.2486	24.6607	25.2423	25.5622	25.4149	25.4666	25.7334	24.6691	0.0943581	0.0224389	24.1339	24.8377	25.2234	0	24.5837	25.3111	26.162	0	24.2091	24.9787	25.9265	0	24.1854	25.4677	26.0928	0	24.7064	25.9919	23.2838	0	24.4976	25.7855	25.4439	0	24.7066	25.9769	26.003	0	25.103	25.7649	25.3768	0
Glyma.07G224200.1	S186	2	Control	StatsSet	24.6982	25.2067	25.2436	24.6933	24.839	24.7257	25.6292	24.9896	24.9043	24.3314	25.283	0.0943581	0.0224389	23.9181	25.1497	25.0269	0	24.6288	25.4009	25.5903	0	24.7465	25.4283	25.556	0	24.1182	25.2318	24.73	0	24.5401	25.4323	24.5447	0	25.0644	23.8226	25.2901	0	25.8794	24.7683	26.24	0	24.9231	25.289	24.7566	0
Glyma.07G241500.1	S673	1	Cold	StatsSet	23.8198	23.9157	24.1917	23.6502	23.9746	23.816	23.8236	23.8858	23.5677	23.3547	23.9509	0.00900759	0.00257773	24.6533	23.2931	23.513	0	24.5271	23.6035	23.6165	0	24.8364	24.0544	23.6842	0	24.1637	23.6289	23.5506	23.2575	24.4488	23.6597	23.8153	0	24.365	23.8018	23.7005	23.3965	24.313	23.9146	23.784	23.2829	23.9895	23.7847	23.8833	0
Glyma.07G241500.1	S673	1	Control	StatsSet	24.0181	24.2613	24.3949	24.2084	24.3359	23.8739	23.9296	23.9073	23.8198	24.1103	24.142	0.00900759	0.00257773	24.0459	24.0106	23.7686	24.2474	24.3973	24.2177	23.6667	24.7634	23.9209	24.2685	24.2183	25.1718	24.3992	0	23.6515	24.5745	24.0634	25.0556	24.0227	24.2019	23.718	24.3762	23.6068	23.7944	23.7798	24.2297	23.8423	23.8665	23.6374	24.0653	24.1478	23.7786
Glyma.07G252100.1	S3561	1	Cold	StatsSet	20.9178	21.1772	21.5571	21.599	21.1052	21.3786	20.755	21.0055	21.2022	21.1265	20.8952	1.78e-07	1.18e-07	21.7151	20.7013	20.4106	20.8444	22.3022	20.8948	20.4649	21.0469	22.1934	21.3176	0	21.1603	22.0951	21.2113	0	21.4907	22.0275	21.1094	20.3674	20.9166	22.1849	0	20.8284	21.1225	22.2958	21.4783	17.9912	21.2546	0	21.3406	20.5759	21.1
Glyma.07G252100.1	S3561	1	Control	StatsSet	21.5931	21.8174	21.8851	21.7697	22.1907	21.7911	21.7735	21.98	21.5735	21.9068	21.8702	1.78e-07	1.18e-07	0	21.8713	21.1721	21.7359	22.2415	21.8106	21.1834	22.0342	21.9923	21.6466	21.2766	22.625	22.3317	21.2455	21.275	22.2266	22.5786	22.2598	22.4698	21.4547	21.9622	22.1393	21.4797	21.583	21.7332	22.1438	0	21.4437	22.499	21.835	0	21.6059
Glyma.07G252700.1	S45	1	Cold	StatsSet	26.9566	26.9778	26.9606	26.7102	27.209	27.0644	26.998	26.9308	27.0955	27.2453	27.2903	0.0318628	0.00847208	26.8258	26.801	27.2428	0	27.4172	26.8002	26.716	0	27.2016	26.7946	26.8855	0	26.9048	26.4051	26.8206	0	27.4985	27.0112	27.1174	0	27.0699	26.9246	27.1986	0	27.0913	26.6681	27.2348	0	27.0201	27.0094	26.7629	0
Glyma.07G252700.1	S45	1	Control	StatsSet	27.3238	27.0924	27.098	27.362	27.5019	26.9477	27.1979	26.9862	27.1819	27.0515	27.3002	0.0318628	0.00847208	27.6656	27.2176	27.0883	0	27.0756	27.4736	26.7279	0	27.107	26.9268	27.2603	0	27.3758	27.5155	27.1946	0	27.4856	27.5799	27.4404	0	26.9829	27.0707	26.7894	0	27.3342	27.5307	26.7289	0	27.2216	27.1734	26.5637	0
Glyma.08G016800.1	S122	1	Cold	StatsSet	23.886	23.7281	24.0285	24.1506	23.7547	23.8445	24.0543	23.8055	23.8322	23.2545	24.1255	2.95e-05	1.25e-05	24.1037	24.2579	24.1177	23.0648	23.7268	23.664	24.4465	23.0751	24.1061	23.9215	24.0578	0	23.6678	24.1644	24.6196	0	24.2034	23.8103	23.2503	0	23.9111	24.006	24.375	23.0857	23.8346	24.1479	24.1805	0	23.4105	24.3354	24.3492	23.1268
Glyma.08G016800.1	S122	1	Control	StatsSet	23.2285	23.5535	23.5826	23.0836	23.7953	23.2644	23.2966	22.9857	23.2508	23.3661	23.3838	2.95e-05	1.25e-05	22.6792	23.4538	23.0934	23.6876	23.3752	23.4374	23.7061	23.6951	22.896	23.7113	24.1114	23.6119	23.4091	22.9643	22.8418	23.1193	22.8691	24.3156	24.1244	23.8722	22.5315	24.0551	23.0663	23.4049	23.0519	23.3434	23.7407	23.0504	22.5427	23.2185	23.1892	22.9923
Glyma.08G025300.1	T18	1	Cold	StatsSet	26.0427	25.9113	25.8524	26.0456	25.9456	25.968	25.9713	25.9386	26.0603	25.8049	25.7986	9.73e-08	6.81e-08	26.1897	25.7808	25.8199	26.3806	24.9896	25.8045	26.4576	26.3935	25.4502	25.53	26.4226	26.0067	25.3655	26.0626	26.7029	26.0512	25.2987	26.3105	26.4469	25.7265	25.4839	25.5757	26.1326	26.6796	25.4616	26.0848	26.2732	26.0656	25.2802	25.6952	26.6055	26.1736
Glyma.08G025300.1	T18	1	Control	StatsSet	25.5167	25.8076	25.6759	25.4288	25.414	25.8108	25.6857	25.4556	25.4902	25.764	25.3841	9.73e-08	6.81e-08	24.4387	25.8115	25.994	25.8225	25.2782	25.594	26.0928	26.2652	25.2585	25.7384	26.1636	25.543	25.2427	25.3851	25.6862	25.4012	24.9695	25.446	25.4454	25.7952	24.9005	25.8904	26.0067	26.4454	25.0472	25.9284	26.2536	25.5134	24.7259	25.7378	26.0426	25.3159
Glyma.08G026700.1	S1075	1	Cold	StatsSet	23.3927	24.2411	24.0566	24.1949	24.2466	24.4674	24.8709	24.5885	24.8609	25.6175	23.9006	0.0568195	0.0142654	23.2017	23.4453	0	23.531	23.7855	25.4951	24.8177	22.8662	22.811	24.0465	25.5958	23.7731	23.3788	24.4848	26.0716	22.8445	23.9793	25.7821	0	22.9783	24.0442	24.8417	25.6042	23.3795	24.3615	25.721	26.3711	23.0302	25.6782	24.8299	25.6334	22.2127
Glyma.08G026700.1	S1075	1	Control	StatsSet	24.4306	24.7589	25.1815	24.6471	24.7298	24.3636	25.9928	24.8089	24.7367	24.3249	25.3087	0.0568195	0.0142654	23.5931	24.773	25.0116	24.3447	23.8993	25.4903	25.3325	24.3135	0	25.7901	25.5935	24.1608	23.7891	25.3059	25.4035	24.0898	24.1324	25.5159	24.8854	24.3855	25.6454	22.9073	24.5031	24.3985	26.2099	24.6963	27.0723	0	24.653	25.1496	24.6241	0
Glyma.08G037300.1	T220	1	Cold	StatsSet	24.9465	24.3295	24.4561	24.2787	24.6638	24.6874	24.4138	24.5677	24.2072	24.0253	24.606	0.03728	0.00979676	25.6872	24.3378	24.3263	25.4345	25.2824	23.9076	23.7072	24.4208	25.9053	23.1819	24.0907	24.6463	25.6689	23.3336	23.6018	24.5107	25.18	23.4921	25.2631	24.7199	25.8278	23.6517	24.1705	25.0999	25.1686	23.8936	23.9258	24.6673	25.2304	23.7274	0	24.7452
Glyma.08G037300.1	T220	1	Control	StatsSet	25.0786	24.8289	24.4449	24.4491	24.5803	24.6029	24.6244	24.9973	24.7925	24.6367	24.6449	0.03728	0.00979676	25.7999	24.6794	24.0498	25.7854	25.7791	24.251	23.5581	25.7274	23.9837	24.3161	23.7568	25.723	25.4686	22.5187	24.0067	25.8023	25.2606	23.3706	24.6388	25.0515	25.1519	24.4588	23.5792	25.2217	24.899	24.3756	23.6306	25.5922	25.5845	24.4565	24.391	25.557
Glyma.08G044100.1	S124	1	Cold	StatsSet	30.5597	30.5257	30.4088	30.5366	30.4884	30.8562	30.9964	30.849	30.9238	30.8745	30.5047	3.35e-16	1.26e-15	29.9147	31.1689	30.9039	30.2514	29.9143	30.6853	31.297	30.2061	29.8628	30.7354	31.114	29.923	30.0478	31.1166	31.0523	29.9297	29.8063	31.1719	31.2294	29.7459	30.3419	31.1698	31.2928	30.6202	30.6162	31.2797	31.5135	30.5762	30.6941	30.9738	31.4849	30.2433
Glyma.08G044100.1	S124	1	Control	StatsSet	29.7245	29.548	29.3952	29.4366	29.1265	29.8969	29.8182	29.8981	30.0799	29.9163	29.398	3.35e-16	1.26e-15	30.2246	30.0031	30.4037	28.2669	30.0554	29.7017	30.3851	28.0497	29.7308	29.6274	30.1305	28.0922	29.4838	30.0264	29.9052	28.331	30.031	29.2846	28.9635	28.2269	30.4946	29.7357	30.2298	29.1276	30.4663	30.087	30.1691	28.5503	30.4531	29.7668	30.7678	28.6046
Glyma.08G055600.1	S70	1	Cold	StatsSet	27.541	27.431	27.6909	27.4631	27.5491	27.266	27.5573	27.4757	27.4533	27.7764	27.3436	1.84e-07	1.19e-07	26.747	27.7092	28.0308	27.6771	26.1452	27.3934	27.6347	28.5507	26.0995	28.6135	27.7058	28.3448	26.4367	27.8223	27.2787	28.3149	27.0617	28.0035	27.6893	27.4421	26.1584	27.8989	27.5648	27.4417	26.3991	0	28.1325	28.1404	26.0274	27.6898	28.1199	28.0658
Glyma.08G055600.1	S70	1	Control	StatsSet	26.8532	26.8623	26.7603	26.4981	26.3419	26.7884	26.6421	26.7766	26.8244	26.9212	26.583	1.84e-07	1.19e-07	26.803	27.2385	27.0618	26.3093	26.0042	26.9575	27.6644	26.8231	0	26.6451	27.4528	26.1829	26.5885	27.1571	26.8002	25.4467	26.9577	26.6181	25.9005	25.8912	26.6233	27.1336	27.1678	26.2287	26.7598	26.7721	27.2148	25.8216	27.0763	26.6936	27.2864	26.05
Glyma.08G055700.1	S361	1	Cold	StatsSet	26.4172	25.4373	25.9095	25.8841	27.037	26.3456	26.0381	26.1344	26.0725	26.1953	25.7828	5.01e-08	3.68e-08	24.14	26.4435	28.6681	0	24.0391	25.7225	26.5503	0	25.1728	25.1952	27.3606	0	24.487	25.9964	27.1689	0	24.6687	27.1368	29.3055	0	24.9077	26.4	27.729	0	24.4642	26.1589	27.4912	0	24.6124	25.9083	27.8824	0
Glyma.08G055700.1	S361	1	Control	StatsSet	24.4687	23.9266	23.6922	23.8823	23.7592	25.4321	24.5303	24.5735	25.4264	25.3434	24.4652	5.01e-08	3.68e-08	24.7598	23.8509	24.7954	0	24.1679	23.783	23.829	0	23.8154	23.444	23.8173	0	22.9473	24.5493	24.1501	0	24.4656	23.8541	22.9581	0	25.6227	25.5294	25.1441	0	23.8552	24.4445	25.2913	0	25.2617	23.2535	25.2055	0
Glyma.08G102600.1	S721	1	Cold	StatsSet	23.1902	23.4039	23.3651	23.4552	23.583	23.5699	23.3086	23.4318	23.5285	23.4623	23.2835	5.46e-07	3.29e-07	24.1575	22.8351	23.0835	22.6849	24.4651	23.0199	23.4743	22.6564	24.684	23.1305	23.0735	22.5722	23.9735	23.0655	23.438	23.3437	24.2634	23.4226	0	23.0631	24.1996	0	23.4482	23.0621	23.918	23.3831	23.1613	22.7719	24.1457	23.5183	23.1894	22.8739
Glyma.08G102600.1	S721	1	Control	StatsSet	24.0276	23.9132	23.8108	23.8192	24.0883	23.8692	23.8346	23.886	23.8371	23.7189	24.0828	5.46e-07	3.29e-07	24.6434	23.268	23.599	24.6	24.3789	23.3682	23.4717	24.4341	24.0242	23.2257	23.5384	24.4547	24.005	23.5189	23.718	24.0347	24.4356	23.0389	24.5366	24.3422	23.8972	23.7808	23.5717	24.2271	24.307	23.5002	23.3815	24.1499	24.3177	23.5785	23.5225	24.1252
Glyma.08G122700.1	S311	1	Cold	StatsSet	25.6209	25.849	25.8505	26.0001	25.7178	25.7789	25.7761	25.4975	25.8348	25.8337	25.8184	6.17e-08	4.48e-08	25.3181	26.1657	25.2659	25.7339	25.2868	25.7542	26.3933	25.9618	25.2604	25.8202	26.0003	26.321	25.5932	25.9639	26.2541	26.1891	25.3194	26.0377	25.873	25.6408	25.537	26.1133	25.5348	25.9304	25.7952	26.0554	25.371	25.8828	24.9801	26.1026	25.4097	0
Glyma.08G122700.1	S311	1	Control	StatsSet	25.3439	25.2643	24.9193	25.2019	25.0452	25.1536	25.4263	25.3737	25.2463	25.4321	25.0238	6.17e-08	4.48e-08	25.1899	25.8066	25.6459	24.733	25.0202	25.7151	25.494	24.8279	22.7113	25.796	25.8603	25.3095	25.0651	25.5604	25.2079	24.9741	24.845	25.451	24.4985	25.3863	24.7998	25.3431	25.4974	24.9743	25.6008	25.7985	25.522	24.7839	25.4732	25.8406	25.4274	24.7534
Glyma.08G152400.1	T1410	1	Cold	StatsSet	20.9802	20.914	21.0977	21.3342	21.0066	21.0869	21.0704	20.962	21.0753	20.9675	21.3147	2.97e-15	8.72e-15	22.1063	21.4931	20.4366	19.8846	21.3281	21.3699	21.0688	19.8891	0	21.5803	21.1324	20.5806	22.1546	21.5895	20.666	20.9267	21.3894	21.1979	20.891	20.548	21.6425	21.3974	21.1992	20.1083	21.0068	21.7357	20.8248	20.7142	20.7928	21.6073	21.0804	20.3674
Glyma.08G152400.1	T1410	1	Control	StatsSet	22.2986	22.4623	22.2468	22.321	22.5284	21.6873	21.8017	21.8777	21.5751	22.2278	21.8418	2.97e-15	8.72e-15	0	22.4307	22.2642	22.2011	22.4696	22.3783	22.2208	22.7806	21.9999	22.6134	21.9185	22.4554	22.6357	22.1322	21.9051	22.6111	22.0244	23.0194	23.2822	21.7876	21.5629	22.2345	21.7802	21.1717	21.9875	22.507	21.0671	21.6451	21.907	22.3088	21.8574	21.4376
Glyma.08G171800.1	S84	1	Cold	StatsSet	24.6525	24.8133	24.2592	24.8565	24.7995	24.5982	24.8056	25.0202	24.828	24.8492	24.8599	1.93e-11	2.96e-11	24.1651	25.1975	24.4538	24.7935	23.4836	24.8018	25.3237	25.6439	20.7963	25.0043	25.5736	25.6625	23.9128	24.8252	24.9085	25.7796	23.9533	25.2454	25.2981	24.7013	23.627	25.1213	25.2343	24.4103	23.0541	24.8353	25.7647	25.5683	23.3581	25.0395	25.4738	26.2096
Glyma.08G171800.1	S84	1	Control	StatsSet	23.1351	23.7875	23.645	23.159	23.1618	23.8571	23.5276	22.9689	23.5888	23.7274	23.3336	1.93e-11	2.96e-11	21.5897	24.0017	24.0952	22.8539	23.9018	23.1542	24.8387	23.2555	23.6157	23.3698	23.9394	23.6551	22.7146	23.7619	23.2266	22.9327	23.2477	23.7339	22.6523	23.0131	24.075	23.879	24.4726	23.002	23.7731	24.0104	24.2351	22.0918	20.8918	23.7372	24.3179	22.9285
Glyma.08G184400.1	S472	1	Cold	StatsSet	26.5765	26.2575	26.4157	26.3665	26.3246	26.228	26.6465	26.4423	26.2343	26.6047	26.1835	0.148172	0.0336939	26.1124	26.6384	26.9787	0	25.3958	26.7707	26.606	0	25.9652	26.5873	26.6946	0	25.7963	26.4636	26.8396	0	26.0877	26.4776	26.4085	0	25.722	26.5417	26.4203	0	26.3627	26.532	27.0447	0	26.1348	26.532	26.6602	0
Glyma.08G184400.1	S472	1	Control	StatsSet	26.169	26.3358	26.2731	26.2331	26.1272	26.2067	26.5384	26.2898	26.197	26.1104	26.4531	0.148172	0.0336939	25.6796	26.3139	26.5136	0	25.7241	26.3012	26.9821	0	26.0864	26.2351	26.4977	0	25.4079	26.5913	26.7002	0	25.4794	26.5563	26.3459	0	25.3748	26.7138	26.5314	0	25.6866	26.4879	27.4409	0	25.6315	25.8613	27.3765	0
Glyma.08G196300.1	S133	1	Cold	StatsSet	25.8112	25.5463	26.0609	26.0053	25.8821	25.8904	25.5088	25.5072	25.5922	25.1718	25.9176	0.000192071	6.94e-05	27.2991	26.0947	24.9632	24.8878	0	25.7327	25.7059	25.2002	27.4326	25.9636	25.2297	25.6178	27.0162	25.7806	25.3705	25.8538	26.53	25.9705	25.6358	25.3919	26.6852	25.9012	25.9086	25.0664	25.2706	26.326	25.0216	25.4168	24.8722	26.1123	25.5183	25.5259
Glyma.08G196300.1	S133	1	Control	StatsSet	26.7905	26.4074	26.3414	25.3502	26.4378	25.9374	25.9003	26.0268	25.8171	26.3707	26.1085	0.000192071	6.94e-05	26.9117	27.2727	26.1918	26.7858	26.761	26.3966	26.1007	26.3713	26.3299	26.6786	25.9202	26.437	0	24.7549	25.6469	25.6487	27.2473	26.0837	26.298	26.1223	26.0985	26.2481	25.6767	25.7263	26.3106	26.5855	25.1334	25.5716	26.5879	26.613	25.576	25.3304
Glyma.08G264900.1	S148	1	Cold	StatsSet	23.4277	23.3489	23.8206	23.7611	24.1347	24.2832	24.1637	24.3917	24.1984	24.6021	23.3845	0.145953	0.0333014	23.5496	23.3928	23.5185	23.25	24.1578	23.3758	23.2814	22.5807	24.5468	24.2043	23.6044	22.9268	24.3655	24.5664	23.5175	22.5949	24.1407	24.524	24.0473	23.8268	23.9065	24.8544	24.1266	24.2454	24.0781	24.1794	24.2335	0	24.2581	24.7539	24.1632	0
Glyma.08G264900.1	S148	1	Control	StatsSet	23.6239	23.5226	23.8571	24.1628	24.1211	24.1831	24.1939	24.4626	24.4288	24.6871	23.3348	0.145953	0.0333014	23.9449	24.2331	22.8866	23.431	23.7443	23.7357	23.4551	23.1555	24.3151	24.3825	23.1787	23.5523	24.0817	24.867	23.7184	23.984	24.6387	23.8305	23.9932	24.0221	24.4191	24.2289	24.2125	23.872	24.1275	24.2526	23.9849	24.4106	24.4826	24.9342	23.8356	24.5981
Glyma.08G264900.1	S391	1	Cold	StatsSet	21.539	21.427	21.5073	21.5137	21.3365	21.6536	21.5725	21.9334	21.5251	21.6728	21.5393	1.65e-05	7.3e-06	23.1413	21.2298	21.0439	20.7409	23.077	21.0266	20.562	21.0424	23.7933	21.0406	20.4168	20.7786	23.5283	0	20.3958	20.6172	22.9206	21.1397	20.5819	20.704	23.0413	21.718	20.8924	20.9626	22.5186	22.1282	20.6652	20.9781	22.6078	22.5353	21.0771	21.5132
Glyma.08G264900.1	S391	1	Control	StatsSet	22.3654	22.1417	22.0187	22.4511	22.8605	21.9577	21.8618	22.5725	22.0152	22.2968	22.1318	1.65e-05	7.3e-06	22.5526	22.2334	21.6939	22.9818	22.7611	21.805	21.3754	22.6251	21.9259	22.4431	21.6869	0	22.3666	22.2397	22.3665	22.8317	22.7698	21.9783	23.7924	22.9016	22.319	21.9384	21.6158	0	22.1199	21.5243	21.3675	22.4358	22.8206	22.6905	22.1349	22.644
Glyma.08G266300.1	Y294	1	Cold	StatsSet	23.7317	23.6812	23.7059	23.6807	23.6944	23.7984	23.8551	23.7782	23.9103	24.0246	23.7838	0.0607141	0.0150199	24.0742	23.5134	23.6026	23.7369	23.8469	23.8405	23.5404	23.4972	24.4709	23.7215	23.3301	23.3012	24.0773	23.594	23.3708	0	24.0847	23.5385	23.4827	23.6717	24.1416	23.7271	23.6256	23.6993	24.3459	23.8117	23.5453	23.7175	24.006	23.7453	23.6206	23.7409
Glyma.08G266300.1	Y294	1	Control	StatsSet	23.9087	23.8688	23.8893	24.1793	23.9468	24.1426	23.7117	23.8045	23.771	23.7033	23.8801	0.0607141	0.0150199	24.2425	23.6407	23.4608	24.291	24.0689	23.7429	23.4503	24.2131	24.1065	23.7637	23.3452	24.3417	24.1523	23.911	23.6166	25.0372	23.9968	23.9939	23.6337	24.1626	24.1385	24.1895	23.6631	24.5793	23.874	23.452	23.4023	24.1185	24.078	23.7014	23.2465	24.1922
Glyma.08G279800.1	S45	1	Cold	StatsSet	26.3115	25.6843	25.7866	26.2379	26.0705	25.9824	25.9859	26.0203	26.0284	26.013	26.1677	5.22e-07	3.24e-07	25.5377	26.6385	26.7585	0	25.4369	25.7166	25.8993	0	25.3163	25.8792	26.1645	0	25.8748	26.3417	26.4973	0	25.6638	26.02	26.5276	0	25.5019	25.9343	26.5109	0	25.7123	25.8941	26.3513	0	25.3921	26.369	26.2999	0
Glyma.08G279800.1	S45	1	Control	StatsSet	26.6251	26.4676	26.7239	26.2962	26.4905	26.4826	26.5171	26.2998	26.4103	26.2628	26.7187	5.22e-07	3.24e-07	26.1374	27.148	26.5899	0	26.1325	26.6501	26.6202	0	25.9563	26.9765	27.2389	0	26.3955	26.5295	25.9637	0	26.0602	26.8354	26.5759	0	26.2293	26.833	26.3856	0	25.9822	26.8191	26.75	0	26.1745	26.7899	25.935	0
Glyma.08G288600.1	S5	1	Cold	StatsSet	24.079	23.5251	24.2963	24.1618	24.4597	24.0254	24.2812	25.018	24.2683	23.3814	24.1213	3.5e-12	6.56e-12	23.1304	24.8614	23.8373	24.4868	21.3943	24.2695	24.9116	0	22.5841	24.4166	25.564	24.6204	23.0306	24.4671	24.9878	0	23.2276	24.9236	25.3369	24.3508	22.9636	24.1739	24.9581	24.0059	22.4839	25.1326	24.5959	24.9125	0	24.3461	26.2092	24.4985
Glyma.08G288600.1	S5	1	Control	StatsSet	23.0394	23.4042	23.1856	22.5554	22.3956	22.7177	22.8198	23.371	23.054	23.1209	23.0411	3.5e-12	6.56e-12	0	23.1507	23.3174	22.65	23.137	23.0122	24.3556	23.1119	0	23.2183	23.5792	22.7592	21.5536	22.3632	23.5364	22.7685	22.3855	22.5345	22.2668	0	21.746	23.1601	23.2723	22.6925	22.4332	23.5953	22.6978	22.553	23.0152	23.3099	24.3621	22.7969
Glyma.08G362400.1	S292	2	Cold	UniqueSet	0	0	0	0	0	0	0	0	0	0	0	NA	NA	0	23.1568	0	0	0	24.5231	0	0	0	23.6204	0	0	0	23.9599	0	0	0	24.2504	0	0	0	24.0323	0	0	0	24.4168	0	0	0	24.316	0	0
Glyma.08G362400.1	S292	2	Control	UniqueSet	23.1988	0	0	0	0	0	0	0	0	0	23.8641	NA	NA	21.4942	24.0385	0	24.0637	0	0	0	24.6059	0	24.6353	0	0	0	0	0	0	0	0	0	24.0684	0	22.8316	0	0	0	24.2194	0	0	0	0	0	0
Glyma.09G018600.1	S13	1	Cold	StatsSet	24.8166	24.0315	24.6456	24.6084	24.7817	24.7654	24.828	24.9787	24.8078	24.461	24.5487	0.0382996	0.00996152	24.654	25.3677	24.8062	24.4384	23.9724	24.0994	24.1714	23.8829	24.8512	24.7751	24.6094	24.3466	25.2165	24.6144	24.5308	24.0719	25.1054	24.7046	24.739	24.5777	24.8555	24.9608	24.8677	24.3778	24.8279	25.053	25.0067	24.4242	24.7891	24.5695	25.5517	25.0045
Glyma.09G018600.1	S13	1	Control	StatsSet	24.6299	24.4393	24.6363	24.4834	24.4404	24.5813	24.5447	24.4265	24.2396	24.8378	24.3139	0.0382996	0.00996152	24.3164	24.798	24.6181	24.7871	24.3351	24.5946	24.0446	24.783	24.0068	24.7317	24.8817	24.9251	24.0583	24.6444	24.4988	24.7322	24.1469	24.1741	24.8507	24.5899	24.1774	24.9838	24.5419	24.622	24.5054	24.2544	24.5622	24.8567	24.1886	24.1939	24.9661	24.3574
Glyma.09G057400.1	S788	1	Cold	StatsSet	26.4266	26.214	26.4127	26.4157	26.4753	26.7024	26.6615	26.7946	26.4279	26.2944	26.156	0.0205386	0.00563867	26.4549	26.4156	26.4095	0	26.2451	25.6936	26.7034	0	26.788	25.7928	26.6572	0	26.3857	26.1	26.7614	0	26.0187	26.7034	26.7036	0	26.8503	26.4156	26.8413	0	27.1716	26.103	26.7099	0	26.7761	26.8555	26.7522	0
Glyma.09G057400.1	S788	1	Control	StatsSet	26.1885	26.2106	26.0532	26.1518	25.8181	26.3555	26.4952	26.3378	26.3128	26.3366	26.4202	0.0205386	0.00563867	26.6008	25.8489	26.1157	0	26.2503	26.1057	26.2757	0	26.0133	25.8798	26.2666	0	25.9476	25.6805	26.8272	0	26.6101	25.2757	25.5685	0	26.1491	26.7652	26.152	0	26.0005	26.6912	26.794	0	26.4189	26.1138	26.4805	0
Glyma.09G097600.1	S616	1	Cold	StatsSet	24.3887	24.2299	24.1192	24.6946	24.3909	24.2891	24.1783	24.1011	24.0639	24.1638	24.4122	0.00137422	0.000431675	24.5944	24.6753	23.8963	0	23.4283	24.3362	24.9253	0	22.8213	24.7085	24.5334	24.4136	24.0199	25.0296	25.0344	0	23.9477	24.6007	24.6244	0	23.8435	24.7436	24.2802	0	23.5202	24.7745	24.2403	0	23.0808	25.0102	24.3733	23.9399
Glyma.09G097600.1	S616	1	Control	StatsSet	23.744	24.0293	24.3973	23.5895	23.9182	23.8602	23.9631	23.7353	23.7415	24.1335	23.8919	0.00137422	0.000431675	22.0554	24.4579	24.427	24.0358	23.6997	24.2781	24.2574	23.882	24.2094	24.4983	24.7086	24.1729	23.6729	23.6227	23.9241	23.1385	23.1364	24.462	23.9362	24.1381	23.3637	24.0958	23.9784	24.0029	23.5756	24.6	24.0043	23.6727	22.5758	24.7033	24.4795	23.1825
Glyma.09G131500.1	S219	1	Cold	StatsSet	25.599	25.5274	26.0638	25.7258	26.0341	25.8366	25.7465	25.8737	25.789	26.057	24.7074	2.31e-16	9.73e-16	27.132	25.7448	24.7032	24.816	26.6382	25.3609	25.597	24.5137	27.0452	25.9536	26.3004	24.9561	26.9115	25.2354	25.5735	25.183	27.0226	26.1054	25.3255	25.6829	26.6618	26.1131	25.1013	25.4701	26.3365	26.2758	25.6634	24.71	26.326	25.7458	26.1866	25.2364
Glyma.09G131500.1	S219	1	Control	StatsSet	27.972	27.6028	27.4986	27.964	27.5722	27.5002	27.42	27.8411	27.2995	27.8686	27.5413	2.31e-16	9.73e-16	28.101	27.9997	27.5274	28.2598	27.1161	27.8474	27.5237	27.9241	27.5277	27.7486	27.0212	27.6969	27.6202	28.1559	27.7242	28.3556	27.4697	27.4468	27.4277	27.9446	27.3696	27.8008	27.1554	27.6747	27.2252	27.3139	26.8749	28.266	27.8781	27.7394	27.7195	28.0272
Glyma.09G169500.1	S769	1	Cold	StatsSet	25.611	25.324	25.4836	25.5203	25.5865	25.7585	25.6696	25.5898	25.6798	25.5825	25.4298	0.0243207	0.00657016	24.9257	25.9824	25.9993	25.5365	24.8064	25.8271	25.4588	25.2038	24.7362	25.6121	25.8925	25.6936	25.0836	25.5652	25.8415	25.5908	25.13	25.49	25.9021	25.8241	25.0076	25.61	26.0503	26.3662	25.3196	25.6206	26.1687	25.5695	25.1659	25.7921	26.0379	25.3634
Glyma.09G169500.1	S769	1	Control	StatsSet	25.4424	25.4238	25.676	25.3658	25.4373	25.3718	25.4938	25.4461	25.5464	25.5181	25.4616	0.0243207	0.00657016	25.1884	25.5474	25.3407	25.6931	25.1795	25.2052	25.819	25.4917	0	25.2841	25.8745	25.8693	24.9725	25.3534	25.5908	25.5466	25.0821	25.6812	25.2899	25.6958	24.9246	25.4402	25.388	25.7345	25.1334	25.2187	26.0882	25.5347	25.2289	25.3443	25.8013	25.41
Glyma.09G188300.1	S186	1	Cold	StatsSet	24.4026	24.3614	24.3956	24.3879	24.6928	24.4432	24.6289	23.9686	24.4933	24.1937	24.482	0.904836	0.17214	25.0095	24.1772	24.0212	0	25.0491	24.1354	23.8998	0	25.0511	23.9985	24.1372	0	24.7115	24.1531	24.299	0	25.4698	24.1723	24.4365	0	24.5942	24.0075	24.7277	0	25.1302	24.4343	24.3222	0	24.4821	23.8041	23.6196	0
Glyma.09G188300.1	S186	1	Control	StatsSet	24.3324	24.4185	24.268	24.1499	24.631	24.4248	24.3643	24.4754	24.4799	24.4517	24.3703	0.904836	0.17214	25.2044	23.9229	23.8699	0	25.2092	24.2465	23.7998	0	24.3974	24.1655	24.241	0	24.8404	23.4992	24.1101	0	25.3623	24.3342	24.1966	0	24.9602	24.3346	23.9795	0	25.1489	24.1588	23.7853	0	25.2748	24.1137	24.0378	0
Glyma.09G212400.1	T35	1	Cold	StatsSet	24.2117	23.8873	24.273	24.1937	24.1758	24.2899	24.548	24.4529	24.5223	24.6748	24.0465	6.9e-07	4.02e-07	25.3104	23.4056	23.9292	24.2015	24.6084	23.8035	23.2512	23.8862	25.4327	23.6837	24.115	23.8607	25.0234	23.9214	23.6847	24.1454	25.0237	23.6781	23.8472	24.1542	24.6902	23.9971	23.9973	24.4749	25.4024	24.1617	24.0851	24.5429	25.0803	24.0129	24.1138	24.6047
Glyma.09G212400.1	T35	1	Control	StatsSet	24.8641	24.7824	24.7946	24.7981	24.8589	24.8405	24.5231	24.5312	24.623	24.5825	24.5516	6.9e-07	4.02e-07	25.5491	24.2872	24.0317	25.5884	25.5474	24.1967	24.0292	25.3565	25.0006	24.3053	23.8513	26.0213	0	24.4525	24.0996	25.8423	25.2031	24.392	24.3906	25.4498	24.927	24.6256	24.0549	25.7545	25.1647	23.9239	23.9209	25.0829	25.1097	24.0672	23.7915	25.1563
Glyma.09G226400.1	T899	1	Cold	StatsSet	24.0944	23.6624	23.4495	23.067	23.2332	23.293	22.9939	23.3388	23.3479	23.4703	23.8142	2.24e-11	3.28e-11	23.7613	24.2109	24.3111	0	23.9297	23.5887	23.937	23.194	23.6008	23.1028	23.6448	0	23.1775	22.5077	23.5158	0	23.6645	22.8311	23.2039	0	23.0115	22.9671	23.9002	0	23.0888	23.1649	22.728	0	23.3864	23.0519	23.5781	0
Glyma.09G226400.1	T899	1	Control	StatsSet	23.6884	23.65	23.6646	24.184	24.2212	24.3712	24.0264	24.0741	24.3381	24.1762	23.6235	2.24e-11	3.28e-11	23.9732	23.487	23.4189	23.8746	23.5604	23.6946	23.7418	23.603	23.9748	23.548	23.7368	23.3987	24.2841	24.1882	23.8673	24.3962	24.2601	24.2223	24.1947	24.2076	24.2673	24.552	24.2584	24.4072	23.9072	23.9369	24.0244	24.2371	24.1265	24.1253	23.7172	24.3275
Glyma.09G241100.1	S360	1	Cold	StatsSet	26.7796	26.5006	26.7868	26.6018	26.4265	26.4008	26.5743	26.5416	26.4685	26.6621	26.4543	0.0708386	0.0172094	26.309	26.9908	26.7748	27.0438	25.7028	26.4751	26.8744	26.9499	26.4788	26.8105	26.9782	26.8797	26.1906	26.9731	26.405	26.8386	25.9983	26.8504	26.1645	26.6929	26.0569	26.736	26.2307	26.5794	26.3957	26.6066	26.5727	26.7221	26.4473	26.7967	26.3711	26.5513
Glyma.09G241100.1	S360	1	Control	StatsSet	26.6605	26.6204	26.373	26.5062	26.0332	26.5866	25.5018	26.6207	26.3801	26.5855	26.323	0.0708386	0.0172094	26.2288	26.6883	27.0356	26.6893	26.4508	26.3166	26.7441	26.9699	26.1134	26.2943	26.6523	26.4318	25.8866	26.6927	26.5085	26.9369	25.9028	25.7745	25.9474	26.5081	26.1293	26.1667	27.0157	27.0346	22.3296	26.3028	27.1513	26.2237	26.3618	26.5701	26.8181	26.7328
Glyma.09G278600.1	S331	1	Cold	StatsSet	24.1938	24.1436	24.1279	24.1417	24.3133	24.1453	24.074	24.302	24.0892	24.2347	24.0037	7.78e-06	3.7e-06	24.5816	24.0742	24.0234	24.0959	24.3898	23.668	24.2162	24.3003	23.8503	24.1341	24.4074	24.1199	24.1104	24.0094	24.0442	24.4028	24.9185	24.2932	23.6221	24.4194	24.2785	24.2021	23.9553	0	24.3199	23.9853	24.042	23.949	24.4749	24.1191	24.5269	24.0872
Glyma.09G278600.1	S331	1	Control	StatsSet	24.2847	24.3987	24.6628	24.5667	24.6029	24.4243	24.6929	24.3611	24.4495	24.324	24.6736	7.78e-06	3.7e-06	24.4872	24.4863	24.0329	24.1322	24.3661	24.3937	24.8936	23.9412	24.498	24.4757	25.1022	24.5753	24.8119	24.9942	24.2339	24.2267	24.5926	24.9298	24.41	24.4791	24.2441	24.7273	24.4538	24.2719	24.164	24.4161	25.5023	24.6892	24.3897	24.8542	23.8884	24.3123
Glyma.10G042600.1	S773	1	Cold	StatsSet	22.2573	22.5749	22.5154	22.3866	22.7138	22.7128	22.7455	22.4697	22.7339	22.1514	22.648	6.98e-05	2.74e-05	21.959	22.5699	22.6679	21.8324	22.8025	22.8116	22.3054	22.38	0	22.5305	22.8793	22.1364	22.7449	22.2086	22.2479	22.345	23	22.5415	22.8216	22.4921	22.909	22.6551	22.9707	22.3163	23.0568	22.8148	22.8495	22.2607	22.932	22.4104	22.1761	22.3602
Glyma.10G042600.1	S773	1	Control	StatsSet	21.9473	22.5052	22.4465	22.4005	22.4634	22.2945	22.2792	22.0701	22.231	22.0195	22.4104	6.98e-05	2.74e-05	22.044	21.4602	21.9053	22.3797	22.3544	22.2605	22.6138	22.7921	22.3431	22.1568	22.6424	22.6439	22.4996	22.2022	22.5189	22.3812	22.2616	22.5212	22.8895	22.1812	22.2655	22.3155	22.1458	22.4513	22.4865	22.2421	22.2881	22.1	22.0818	21.9278	22.266	22.005
Glyma.10G082400.1	S8	1	Cold	StatsSet	24.7835	25.0292	24.4449	25.1337	24.3821	24.8915	25.2693	25.328	25.3744	25.4185	24.7127	0.0426155	0.010902	22.2013	24.9437	25.7421	26.2469	23.037	25.0931	25.5482	26.4386	21.1085	24.8747	25.8662	25.9303	23.0332	25.5256	25.7954	26.1807	22.7237	25.8932	23.2526	25.6591	23.5033	25.0978	25.2216	25.7434	23.8409	25.2178	26.0699	25.9485	24.5037	25.072	25.6445	26.0916
Glyma.10G082400.1	S8	1	Control	StatsSet	24.0904	24.5429	24.8265	24.268	24.0684	24.6077	25.6763	24.6262	24.7132	24.466	24.1372	0.0426155	0.010902	24.1399	24.3623	24.7925	23.0668	24.0137	24.2316	25.3836	0	25.6895	24.8373	25.6725	23.1066	23.8681	25.245	24.9718	22.987	23.6276	24.5312	24.3206	23.7941	25.2221	23.5158	25.8067	23.8862	25.3102	0	26.5838	25.1349	24.747	24.4954	24.6577	24.6047
Glyma.10G120300.1	S572	1	Cold	StatsSet	25.5534	25.7448	25.5003	25.5675	25.6083	25.6054	25.7279	25.5541	25.6206	25.8326	25.7731	0.0536086	0.0135601	25.4502	25.1502	25.7313	25.8816	26.0544	25.9642	25.3396	25.6212	25.9892	25.312	25.317	25.383	25.8836	25.3008	25.4885	25.5971	25.4419	25.2649	26.1441	25.5823	26.1387	25.1597	25.3687	25.7545	25.9768	25.3661	25.7701	25.7986	25.9907	25.1702	25.461	25.5946
Glyma.10G120300.1	S572	1	Control	StatsSet	25.4416	25.6105	25.4316	25.4487	25.57	25.6349	25.5156	25.5828	25.542	25.3723	25.3127	0.0536086	0.0135601	26.1964	24.8358	25.0603	25.6738	25.8963	25.2549	25.036	26.2548	25.6138	25.0436	24.6913	26.3777	26.031	24.7857	24.9415	26.0368	25.7914	25.3882	25.5264	25.5739	26.1044	25.1553	25.2258	26.0542	25.8612	25.4993	25.002	25.6999	26.0611	24.7537	25.7636	25.7528
Glyma.10G132800.1	S114	1	Cold	UniqueSet	0	0	0	0	0	0	0	0	0	0	0	NA	NA	0	0	24.941	0	0	0	0	0	0	0	0	0	0	24.9654	0	0	0	0	0	0	0	0	0	0	0	0	0	0	0	0	0	0
Glyma.10G132800.1	S114	1	Control	UniqueSet	24.2559	0	0	0	0	0	0	0	0	0	0	NA	NA	22.7722	24.5447	25.4509	0	0	0	0	0	0	0	24.8088	0	0	0	0	0	0	23.9116	0	0	0	0	0	0	0	24.6532	0	0	0	0	0	0
Glyma.10G132800.1	S138	1	Cold	StatsSet	25.2312	24.9451	25.4393	25.1438	25.2665	25.2969	25.73	25.3759	25.6004	25.1375	25.4059	1.64e-12	3.35e-12	24.3826	25.4976	25.9146	25.1301	24.0643	24.4084	25.3035	26.0042	25.596	25.1094	25.2166	25.8351	24.7815	24.8218	25.5412	25.4306	24.4677	25.1776	26.0271	25.3936	24.4549	25.0514	26.1262	25.5548	24.9318	25.9778	26.2128	25.7977	24.7011	25.1288	25.9789	25.6946
Glyma.10G132800.1	S138	1	Control	StatsSet	24.2074	23.9567	23.3781	23.923	23.6784	24.6263	23.9312	24.4284	24.3096	24.7726	24.3708	1.64e-12	3.35e-12	24.5417	23.4472	24.2402	24.6005	24.1468	23.5986	24.017	24.0643	22.2383	23.8122	24.0838	0	23.8094	23.8129	23.5351	24.5348	24.3126	23.7946	22.4135	24.1929	25.0946	23.69	24.6856	25.0351	24.2343	23.9031	23.622	23.9654	25.1552	23.4254	24.7142	24.4188
Glyma.10G158700.1	S536	1	Cold	StatsSet	27.7468	27.3735	27.439	27.608	27.63	27.663	27.6498	27.4485	27.6282	27.3805	27.4824	5.84e-05	2.36e-05	27.5981	27.6619	27.9803	0	27.7389	27.3359	27.0455	0	27.704	27.0712	27.542	0	28.1791	27.1539	27.491	0	28.2249	26.9219	27.7431	0	27.8738	27.1825	27.9328	0	27.5604	27.4499	27.9391	0	27.9887	27.2687	27.0882	0
Glyma.10G158700.1	S536	1	Control	StatsSet	27.8224	27.7424	27.7775	28.173	27.9157	27.94	27.7675	27.9569	27.9837	28.141	27.7568	5.84e-05	2.36e-05	28.2679	27.4499	27.7494	0	27.7635	27.626	27.8377	0	27.6401	27.7001	27.9923	0	27.8092	28.1509	28.5589	0	27.7694	27.7259	28.2517	0	27.927	27.993	27.9	0	27.9273	27.2044	28.1709	0	28.0154	27.3243	28.5311	0
Glyma.10G166900.1	S434	1	Cold	StatsSet	28.2323	28.3492	27.7416	28.1096	28.0986	27.6105	27.7549	27.0904	27.3854	27.1464	28.5134	0.00024004	8.58e-05	25.6335	29.2581	29.8053	0	26.6634	29.1932	29.1909	0	25.4156	29.0452	28.7639	0	26.3344	29.0181	28.9762	0	26.4445	28.8345	29.0168	0	26.3449	28.4345	28.0522	0	25.9424	28.3529	28.9692	0	25.5466	27.7023	28.0225	0
Glyma.10G166900.1	S434	1	Control	StatsSet	28.098	27.5962	26.6595	26.8061	26.2536	27.3237	26.7077	27.2806	27.0003	26.6761	27.4309	0.00024004	8.58e-05	28.2778	28.1064	27.9096	0	26.345	27.6906	28.7529	0	25.1387	27.3838	27.4559	0	25.0384	28.2175	27.1624	0	26.0555	26.9978	25.7075	0	26.7123	27.7373	27.5214	0	25.6898	27.2213	27.2119	0	27.5015	26.9368	27.4036	0
Glyma.10G173000.1	S334	1	Cold	StatsSet	24.9572	24.8884	24.9223	25.3341	25.5329	25.3131	25.5643	25.7091	25.2129	25.4977	24.7347	2.51e-17	1.41e-16	24.5526	25.1186	24.5048	25.653	23.8203	24.6945	25.2451	25.7936	23.5994	25.0513	25.135	25.9036	24.3639	25.0741	25.3694	26.5292	25.036	25.7805	25.8023	25.5128	23.9882	25.4955	25.8201	25.9486	25.1368	25.4356	25.3705	26.3141	25.3039	25.4887	25.9826	26.0611
Glyma.10G173000.1	S334	1	Control	StatsSet	23.7507	24.2407	24.5439	24.2639	23.2662	24.4791	24.189	23.5833	24.168	24.4704	23.8144	2.51e-17	1.41e-16	22.0712	24.1513	24.4681	24.3121	23.9344	24.3393	24.5171	24.1718	24.5633	24.4009	24.2828	24.9285	23.2659	24.4233	24.443	24.9236	21.7705	23.7896	23.1995	24.3052	24.1444	24.3243	24.6137	24.8342	23.0099	24.5623	25.2112	23.9724	21.3509	23.9357	24.589	24.4575
Glyma.10G198300.1	S28	1	Cold	StatsSet	24.0358	24.6734	24.3781	24.4467	24.7266	24.4937	24.6047	23.8193	24.5375	25.1713	23.9972	0.526543	0.107761	24.4517	23.2601	24.2198	24.2116	25.344	24.878	24.7665	23.705	24.5604	24.069	24.5048	0	24.7036	23.9975	24.6389	0	25.4204	24.808	24.2034	24.4748	25.4189	24.5603	23.6696	24.3259	25.333	24.7568	24.3644	23.9648	25.2382	24.9797	23.8411	21.2184
Glyma.10G198300.1	S28	1	Control	StatsSet	24.3635	24.375	24.6155	25.0983	23.9157	24.9206	24.7363	24.7537	24.8581	24.0366	24.9436	0.526543	0.107761	24.5667	24.0644	23.5293	25.2935	24.4622	24.0467	22.7749	26.2161	24.8037	23.9844	23.6091	26.0649	24.2762	24.9946	24.8116	26.3109	24.2429	23.0896	22.4351	25.8951	24.5968	24.711	24.4806	25.8939	23.8817	24.4725	24.7364	25.8544	24.5184	24.5709	24.2297	25.6959
Glyma.10G202800.1	S252	1	Cold	StatsSet	23.8165	24.183	24.3056	23.9799	23.8672	24.0375	24.0691	24.0996	24.115	24.3952	24.0101	0.0051843	0.00156308	24.5783	23.4936	23.3776	0	24.6012	24.1718	23.7759	0	24.9231	23.9888	24.0049	0	24.6361	23.7187	23.5849	0	24.5337	23.9623	23.1056	0	24.5181	23.8953	23.699	0	24.627	24.0523	23.5278	0	24.5748	24.134	23.59	0
Glyma.10G202800.1	S252	1	Control	StatsSet	24.1301	24.3098	24.1467	24.3658	24.8105	24.2125	24.3252	24.1486	23.9785	24.1731	24.174	0.0051843	0.00156308	24.7047	23.9742	23.7114	0	24.8253	24.1751	23.929	0	24.3358	24.3279	23.7765	0	25.1361	24.1677	23.7936	0	24.8775	24.8685	24.6855	0	24.359	24.4163	23.8623	0	24.5502	24.747	23.6783	0	24.551	24.3494	23.5456	0
Glyma.10G208800.1	T99	1	Cold	StatsSet	23.0448	21.5065	22.7372	22.426	22.6953	22.626	22.7369	22.5268	22.668	22.9629	23.05	2e-07	1.29e-07	23.4772	22.3317	23.3255	0	23.164	22.2579	22.0452	18.5586	23.9389	22.3215	0	21.9512	23.6527	22.2979	22.5411	21.2122	23.6267	22.5417	22.7329	21.8799	23.3709	22.3632	22.8435	21.9263	24.0002	22.9252	0	21.2851	23.4264	22.347	22.2865	22.0473
Glyma.10G208800.1	T99	1	Control	StatsSet	23.481	23.3584	23.2418	23.4728	23.5074	23.486	23.0137	23.3744	23.0635	23.8355	23.2977	2e-07	1.29e-07	24.2215	23.0057	23.1799	23.5168	23.7376	23.609	22.4968	23.59	23.6216	23.0523	22.4446	23.8487	24.1381	22.8042	23.187	23.762	23.747	22.9338	23.8614	23.4873	23.7811	23.593	22.9615	23.6082	23.5606	22.7553	22.5446	23.1941	23.6148	22.8262	23.3204	23.7364
Glyma.10G209000.1	S60	1	Cold	StatsSet	26.4049	26.1263	25.7823	26.4242	26.2048	26.1816	26.089	25.9383	26.0613	26.2212	26.2369	1.87e-17	1.15e-16	24.8935	26.8408	26.8276	27.0576	24.2586	26.6841	26.3441	27.2184	22.4703	26.8508	26.7617	27.0464	24.759	27.0376	26.4889	27.4114	24.5063	27.01	26.6271	26.676	24.3224	26.8105	26.6648	26.9287	24.2849	26.3866	26.8104	26.8742	24.2582	26.0019	26.7427	26.7505
Glyma.10G209000.1	S60	1	Control	StatsSet	25.1056	24.8137	25.3067	24.0815	23.6352	24.4913	24.355	24.6167	24.7703	25.0519	24.5147	1.87e-17	1.15e-16	24.0958	25.6181	26.1297	24.579	23.837	25.1546	25.6596	24.6038	0	25.1849	25.116	25.6193	23.2099	24.8509	24.1975	24.0677	23.3089	24.3923	23.3663	23.4732	23.5607	24.4927	25.6486	24.2631	23.3938	24.9839	24.645	24.397	23.6549	24.8833	25.1914	24.7372
Glyma.10G217200.1	S164	1	Cold	StatsSet	25.442	25.3525	25.2058	25.4347	25.1983	25.3096	25.446	25.2083	25.306	25.1158	25.3819	4.35e-06	2.21e-06	25.0797	25.6253	25.6246	25.4385	25.1012	25.2066	25.8011	25.3012	24.8488	25.115	25.4374	25.4219	25.2554	25.7618	25.3368	25.3848	24.9061	25.3248	25.37	25.1921	25.1986	25.1447	25.4257	25.4694	25.8296	24.9858	25.5888	25.3799	25.1817	25.5425	25.145	24.964
Glyma.10G217200.1	S164	1	Control	StatsSet	25.7538	25.4077	25.567	25.6393	25.4772	25.6856	25.5622	25.5607	25.5444	25.6629	25.4289	4.35e-06	2.21e-06	25.7221	25.7114	25.8818	25.6999	25.395	25.6243	25.2398	25.3716	25.4774	25.3139	25.9136	25.5632	25.3821	25.6551	25.3203	26.1996	25.24	25.2291	25.4289	26.011	25.4327	25.6126	25.6142	26.0828	25.5333	25.6963	25.6695	25.3498	25.3801	25.4823	25.5499	25.8304
Glyma.10G225800.1	S677	1	Cold	StatsSet	24.1245	24.1437	24.4295	24.3653	24.1702	24.3151	24.0255	24.0088	23.8607	23.927	24.6224	1.48e-06	8.22e-07	25.32	24.279	24.1633	22.7355	24.4843	24.3505	23.7259	24.0143	25.3385	24.3359	24.0724	23.9712	25.1668	24.2943	24.0265	23.9736	25.5128	23.6844	24.2265	23.2571	24.5983	24.2194	24.1276	0	23.5616	24.3836	24.0476	24.1093	23.0296	24.2343	24.4599	24.3115
Glyma.10G225800.1	S677	1	Control	StatsSet	25.0178	25.029	24.8638	24.9751	25.0997	24.4703	24.3111	24.5586	24.3029	24.7697	24.4775	1.48e-06	8.22e-07	25.4514	24.7415	25.1042	24.774	25.6745	25.0249	24.4792	24.9373	24.797	25.0173	24.4437	25.1974	25.7131	24.6426	24.8138	24.731	25.33	25.2711	25.5828	24.2149	25.0117	24.6762	24.4442	23.7492	25.3058	24.7859	23.8408	23.3117	24.956	24.7424	25.0442	23.4918
Glyma.10G239100.1	S217	2	Cold	StatsSet	23.5644	23.7387	23.7391	22.0196	23.8369	23.9307	23.3805	23.6044	23.3392	24.3683	23.3388	0.00113119	0.000360362	22.9876	21.2798	25.3091	24.6812	23.5691	21.9513	24.9331	24.5014	23.4978	22.2962	24.7699	24.3926	17.0815	22.5175	24.03	24.4494	23.2761	22.4138	24.8232	24.8346	22.7797	23.0837	24.9421	24.9174	22.7536	21.2008	25.086	24.4818	23.1139	23.2008	0	24.4985
Glyma.10G239100.1	S217	2	Control	StatsSet	24.5184	24.5667	24.8875	24.9609	25.1711	23.065	24.5968	24.8769	24.6515	24.7503	23.2967	0.00113119	0.000360362	22.9511	23.3371	26.1224	25.6632	23.0889	23.1013	25.9808	26.0958	23.5089	23.383	26.2214	26.4366	23.3158	23.9819	26.4206	26.1254	23.3403	23.1085	27.5704	26.6652	23.102	23.353	26.0486	19.7562	22.7582	23.2274	26.0542	26.3475	22.8174	23.9306	26.412	26.3477
Glyma.10G239100.1	S286	2	Cold	StatsSet	20.2655	20.5509	20.6192	20.7389	20.8355	21.1436	19.9507	20.7961	20.5969	21.2182	20.7617	0.438487	0.0905627	21.7806	20.1657	19.7437	19.3722	22.8652	20.2325	19.7846	19.3214	22.8628	20.8638	19.162	19.5882	22.1647	21.3376	19.6099	19.8433	22.4774	20.6638	0	19.3653	21.9522	21.4618	0	20.0169	21.6338	20.9754	17.6414	19.5521	21.7466	21.5388	20.1744	19.7245
Glyma.10G239100.1	S286	2	Control	StatsSet	20.7081	21.0556	21.269	21.5903	22.4311	21.2428	20.6679	21.4012	20.4816	20.4956	20.9332	0.438487	0.0905627	21.0893	21.0523	19.9825	0	21.4653	21.5328	20.1687	0	21.357	22.0314	20.4186	0	22.1213	21.604	21.0458	0	21.832	21.8601	23.6013	0	21.5671	21.5389	20.6225	0	21.4752	21.3916	19.1368	0	20.988	22.2454	20.9701	0
Glyma.10G239100.1	S288	2	Cold	StatsSet	20.2655	20.4467	20.6192	20.7054	20.7239	20.9006	19.9435	20.7961	20.5969	21.2182	20.7617	0.532181	0.108585	21.7806	20.1657	19.7437	19.3722	22.5388	20.142	19.7846	19.3214	22.8628	20.8638	19.162	19.5882	22.0306	21.3376	19.6099	19.8433	22.1427	20.6638	0	19.3653	21.2229	21.4618	0	20.0169	21.6338	20.9467	17.6414	19.5521	21.7466	21.5388	20.1744	19.7245
Glyma.10G239100.1	S288	2	Control	StatsSet	20.7081	21.0556	21.1328	21.315	22.4298	21.0317	20.6679	21.4012	20.4398	20.4082	20.8507	0.532181	0.108585	21.0893	21.0523	19.9825	0	21.4653	21.5328	20.1687	0	20.9483	22.0314	20.4186	0	21.2952	21.604	21.0458	0	21.828	21.8601	23.6013	0	20.9336	21.5389	20.6225	0	21.4752	21.3916	19.1368	0	20.988	22.2454	20.9701	0
Glyma.10G241000.1	S186	1	Cold	StatsSet	27.4848	27.3715	27.3378	27.8329	27.3449	28.065	27.9759	28.3492	28.1144	27.2886	27.3537	0.000528787	0.00017946	26.0898	27.8532	27.9469	28.0492	26.254	27.5602	27.311	28.3607	25.7491	27.4559	28.0952	28.0511	26.5355	27.8162	28.2125	28.7673	26.2275	28.308	26.7803	28.0638	27.1119	28.1676	28.5694	28.4109	26.8948	28.3555	28.1797	28.4735	27.379	28.2247	28.714	29.079
Glyma.10G241000.1	S186	1	Control	StatsSet	26.8735	26.8835	25.3653	26.7717	26.5314	26.9388	27.3376	27.2315	27.4628	27.2053	26.9217	0.000528787	0.00017946	27.2377	27.1484	26.9947	26.1134	27.2243	27.4706	27.4726	25.3667	26.8886	27.6622	26.5482	20.3621	26.5886	27.27	27.0091	26.2191	27.1482	26.5958	26.0575	26.324	28.0742	25.9588	26.9602	26.7621	27.8673	27.1391	26.8027	27.5413	27.8659	26.8962	26.8688	27.2951
Glyma.10G250400.1	S143	1	Cold	StatsSet	23.5835	24.0119	23.8199	23.6736	24.1952	23.594	24.5075	23.8881	24.0201	23.9825	24.2798	3.62e-12	6.61e-12	23.2252	23.83	24.0156	23.2631	22.1139	24.321	24.7489	24.864	23.0926	23.9144	24.4529	0	22.469	24.0665	24.4852	0	0	24.7384	24.6525	23.1947	22.8316	24.0539	24.302	23.1887	0	24.406	24.8388	24.2776	22.0124	24.6343	24.9857	23.9201
Glyma.10G250400.1	S143	1	Control	StatsSet	21.9591	22.9215	22.7158	21.9465	22.2532	22.8996	22.4683	22.6589	23.5323	22.8222	22.846	3.62e-12	6.61e-12	20.3723	22.5861	22.6992	22.179	22.2674	22.3811	23.7676	23.2697	0	22.5858	23.2193	22.3425	20.4313	22.759	22.3558	22.2399	23.0647	22.3977	21.5199	22.0307	22.7027	22.6575	23.5284	22.71	22.0071	22.7078	22.6899	0	22.9405	22.6031	23.429	21.6631
Glyma.11G009200.1	S788	1	Cold	StatsSet	25.655	25.5154	26.0358	25.9078	25.5859	25.6223	25.2726	25.3134	25.5679	25.4389	25.7502	0.744884	0.145817	25.8591	26.1926	24.9133	0	25.0363	25.7437	25.7739	25.5078	25.9229	26.0783	26.1365	26.0055	25.9627	25.5751	26.0385	26.0549	26.1828	25.3922	25.4076	25.3609	25.6163	25.681	25.5697	0	24.7862	25.5064	25.5253	0	24.4646	25.3298	26.1457	0
Glyma.11G009200.1	S788	1	Control	StatsSet	25.6274	25.7858	25.9545	25.296	25.6198	25.4403	25.521	25.2405	25.4773	25.6634	25.3937	0.744884	0.145817	25.7006	25.7822	25.7563	25.2703	26.0886	25.9601	26.1025	24.9921	0	25.8496	26.5922	25.4216	26.1402	24.8576	25.2995	24.8865	26.0542	26.0808	25.3858	24.9582	25.462	25.7166	25.7657	24.8169	26.4129	25.9698	25.6006	24.1008	25.4955	25.8262	25.7617	23.8786
Glyma.11G013900.1	S275	1	Cold	StatsSet	25.0274	25.7745	25.3637	25.5888	25.2613	25.7205	25.9228	25.8842	25.8777	26.2245	25.0536	0.319688	0.0681093	23.3186	25.6874	26.0761	0	24.7246	26.2812	26.3178	0	22.9014	26.2469	26.9428	0	23.8758	26.3621	26.5287	0	24.2131	26.934	24.6367	0	24.002	26.5376	26.6218	0	24.3283	26.7418	26.6982	0	25.1726	26.1686	26.3115	0
Glyma.11G013900.1	S275	1	Control	StatsSet	23.8759	25.557	26.293	24.3628	25.3108	25.4561	26.2408	25.2092	25.7539	25.227	25.7773	0.319688	0.0681093	23.4061	22.2725	25.9491	0	24.3282	25.9407	26.4021	0	26.1465	26.451	26.2815	0	24.3412	26.6245	22.1227	0	24.6675	25.9675	25.2974	0	25.7099	24.5053	26.1532	0	25.5946	25.8407	27.287	0	24.7833	25.9313	24.9131	0
Glyma.11G013900.1	S284	1	Cold	StatsSet	26.6483	26.5438	26.1737	26.513	26.6377	26.1456	26.2415	26.3253	26.2297	26.4463	26.2375	0.730603	0.143438	25.6626	27.4501	26.8321	0	24.9585	27.1279	27.5449	0	24.1234	27.4158	26.9818	0	25.2085	27.4005	26.9301	0	24.9688	27.3262	27.618	0	24.6021	27.0584	26.7764	0	24.8797	26.903	26.9417	0	24.875	27.255	26.8459	0
Glyma.11G013900.1	S284	1	Control	StatsSet	26.4718	26.4757	26.6531	26.4929	25.9295	26.2677	26.4249	26.4409	26.5128	26.5923	26.3483	0.730603	0.143438	25.4737	26.8564	27.0854	0	25.4604	26.4698	27.497	0	26.3794	26.6575	26.9224	0	26.0785	26.8848	26.5156	0	25.7175	26.3762	25.6948	0	25.2189	26.4667	27.1174	0	25.3973	26.8185	27.059	0	25.6893	26.7604	26.8731	0
Glyma.11G014400.1	S208	1	Cold	StatsSet	26.5061	26.4451	26.2304	26.4551	26.699	26.4579	26.664	26.4336	26.5597	26.9065	26.309	4.29e-05	1.79e-05	26.2644	26.6369	26.6168	0	26.2558	26.17	26.9096	0	24.9619	26.8746	26.8548	0	26.2955	26.5984	26.4715	0	26.4338	26.9378	26.7253	0	26.1554	26.9582	26.2602	0	26.2882	26.9966	26.707	0	26.1212	26.77	26.4097	0
Glyma.11G014400.1	S208	1	Control	StatsSet	27.0788	26.9307	27.1651	26.8941	26.423	26.8613	27.031	26.9141	26.613	26.9603	26.9416	4.29e-05	1.79e-05	26.5086	27.3399	27.3879	0	26.6771	26.9931	27.1219	0	27.2983	26.9862	27.2108	0	26.6534	27.1087	26.92	0	26.5176	26.94	25.8114	0	26.5631	27.0276	26.993	0	26.6761	27.1584	27.2585	0	26.7267	26.9678	27.0479	0
Glyma.11G020100.1	S249	1	Cold	StatsSet	25.7681	25.6705	25.6331	26.0465	25.7074	25.6969	25.6256	25.1679	25.6433	25.9319	25.7725	5.34e-07	3.25e-07	25.7263	26.0668	25.5112	0	24.8886	25.7403	26.3825	0	24.9579	26.0202	25.9211	0	25.6723	26.3291	26.1381	0	25.1999	25.9288	25.9936	0	25.5002	25.8287	25.762	0	25.2414	25.8049	25.8304	0	23.8753	25.8189	25.8097	0
Glyma.11G020100.1	S249	1	Control	StatsSet	25.1667	25.3128	25.3638	24.9903	24.8564	25.252	25.4176	25.1884	25.3148	25.3794	25.2475	5.34e-07	3.25e-07	24.455	25.529	25.5162	0	25.1046	25.3691	25.4648	0	25.1	25.3477	25.6435	0	25.0186	24.9727	24.9797	0	25.058	24.9991	24.5121	0	25.0052	25.3015	25.4494	0	25.3224	25.5658	25.3647	0	24.6152	25.49	25.4601	0
Glyma.11G032900.1	S1341	1	Cold	StatsSet	24.2966	23.9394	23.756	23.8457	23.7652	23.8211	23.7629	23.5235	23.8402	23.4314	24.076	9.79e-08	6.81e-08	24.1008	24.5918	24.4763	24.0176	23.6159	23.8839	24.3184	0	23.6006	23.7389	24.0318	23.6526	23.6801	23.7609	24.0962	0	23.9525	23.6876	23.8832	23.5374	23.7557	23.6327	24.075	0	23.8436	23.6879	23.7572	0	23.6668	23.7069	23.468	23.2521
Glyma.11G032900.1	S1341	1	Control	StatsSet	24.2609	23.8694	24.272	24.1257	24.059	24.1525	24.1756	24.0259	24.1737	23.8352	24.254	9.79e-08	6.81e-08	24.2501	24.575	24.0889	24.1295	23.6919	24.1576	24.2323	23.3957	24.0084	24.207	24.5877	24.2848	23.974	24.4438	23.8841	24.2009	23.8211	24.2826	24.1379	23.9944	23.7494	24.4316	24.2183	24.2107	23.9469	24.5089	24.4693	23.7775	24.1253	24.4295	23.8218	23.727
Glyma.11G033600.1	S875	1	Cold	StatsSet	23.6702	23.6713	23.9184	23.2511	23.4379	23.8616	23.8294	23.7447	23.7497	23.8982	23.5899	4.48e-06	2.26e-06	23.8899	23.5614	23.6513	23.5782	23.8455	23.9582	23.5436	23.3377	24.0035	24.2572	23.8743	23.5385	23.5009	24.1305	23.4904	21.8827	24.3849	23.981	23.4563	21.9295	23.4074	24.2467	23.9333	23.8591	23.5763	24.3826	0	23.5294	23.5504	24.389	23.6629	23.3764
Glyma.11G033600.1	S875	1	Control	StatsSet	24.1167	24.1901	24.5322	24.3464	24.3415	23.9197	24.0676	23.9406	23.8114	24.0638	24.2219	4.48e-06	2.26e-06	23.6824	24.5402	24.0155	24.2288	23.8268	24.1945	23.9807	24.7582	24.345	24.3185	24.2987	25.1665	24.2059	24.4491	24.1866	24.5439	23.8228	24.7313	24.4964	24.3154	23.276	24.6047	23.8247	23.9734	23.526	24.6466	23.9725	24.1254	23.543	24.4426	23.9401	23.8369
Glyma.11G041400.1	S198	1	Cold	StatsSet	26.0076	25.4623	25.6603	25.7099	25.7211	25.7652	25.7427	25.6073	25.5722	24.962	25.6413	0.779568	0.151728	25.7578	26.334	25.9309	0	25.133	25.6884	25.5656	0	25.4823	25.6742	25.8244	0	25.6886	25.8946	25.5464	0	25.855	25.4305	25.878	0	25.2914	25.7928	26.2114	0	25.3567	25.8461	26.0253	0	25.0792	25.6438	26.0988	0
Glyma.11G041400.1	S198	1	Control	StatsSet	25.7074	25.6409	25.8446	25.5548	25.9105	25.6213	25.5849	25.5957	25.3179	25.8137	25.5774	0.779568	0.151728	25.1218	25.7596	26.2408	0	25.0845	25.9614	25.8768	0	25.0552	26.073	26.4055	0	24.6682	25.9424	26.0539	0	24.7777	26.4132	26.5405	0	24.856	26.2623	25.7457	0	24.6625	26.0533	26.039	0	24.7524	25.696	26.3387	0
Glyma.11G076700.1	S206	1	Cold	StatsSet	25.053	25.2839	25.501	25.5119	25.3149	25.2112	25.3546	24.5571	25.2756	25.5589	24.898	7.61e-06	3.67e-06	25.0065	25.2948	24.7703	25.1405	24.7422	25.3238	25.8088	25.2607	24.9894	25.5565	25.5345	25.9234	24.7723	25.8392	25.6923	25.7438	24.7156	26.0115	25.5544	24.9781	24.4962	25.3512	25.3106	25.6866	24.8884	25.7967	25.4381	25.2953	24.9024	22.8543	25.3523	25.1193
Glyma.11G076700.1	S206	1	Control	StatsSet	24.7694	24.8055	25.1312	24.5003	24.5045	24.9891	24.5209	24.6486	24.7255	25.0759	24.9506	7.61e-06	3.67e-06	23.7973	25.0574	25.3582	24.8647	24.3312	24.7146	25.4756	24.7009	24.749	24.858	25.5689	25.3489	24.3892	24.5885	24.7359	24.2874	23.7488	25.1253	24.1664	24.9777	24.3437	24.9309	25.4862	25.1957	22.9188	25.0834	25.4929	24.5883	23.9838	25.0879	24.9024	24.6203
Glyma.11G101600.1	S319	1	Cold	StatsSet	24.9527	24.7452	24.7061	24.497	24.5619	24.7369	24.365	23.5873	24.4502	24.6132	24.6648	0.136639	0.0314808	24.8434	24.9063	25.0418	25.0192	24.5743	0	24.739	24.9222	23.9833	25.1167	24.721	25.0033	23.7642	24.7789	24.487	24.958	24.7558	24.5134	24.4164	0	24.3288	25.0465	24.4732	25.099	24.4799	24.5032	24.1121	0	24.3298	24.6636	24.2565	21.0994
Glyma.11G101600.1	S319	1	Control	StatsSet	24.6997	24.74	24.9501	24.6401	24.6114	24.7129	24.9169	24.4521	24.5373	24.6118	24.8758	0.136639	0.0314808	23.9545	25.1385	24.9872	24.7187	24.5249	25.0878	25.0092	24.3381	25.2287	24.9581	25.3679	24.2457	24.1364	25.3152	24.6863	24.4223	24.0934	25.2918	24.6239	24.4365	24.1838	25.3547	24.7891	24.5241	0	25.1609	25.3416	24.2481	23.7998	25.0967	24.4854	24.4266
Glyma.11G105500.1	S120	1	Cold	StatsSet	25.777	25.405	25.5995	25.731	25.5193	25.8307	25.5104	25.2999	24.5172	25.1503	25.817	0.000487332	0.000167923	26.1279	26.0221	26.2278	24.7301	25.7163	25.7498	25.43	24.724	26.0813	25.683	25.4435	25.1901	25.633	25.6566	26.5144	25.1198	25.9927	25.7746	25.5844	24.7253	25.5712	25.7556	26.2754	25.7207	25.3981	25.6111	26.0634	24.9688	24.9384	25.3341	25.7696	25.1577
Glyma.11G105500.1	S120	1	Control	StatsSet	25.0765	25.1641	25.5419	25.0993	25.2636	24.7971	25.0856	24.6982	24.604	25.3206	25.0385	0.000487332	0.000167923	24.5711	25.4274	24.9283	25.3793	24.9344	25.5703	24.9184	25.2332	0	25.5999	25.373	25.6528	24.8232	25.2658	24.931	25.3773	24.7232	26.1395	25.2645	24.927	24.4306	25.3085	24.5456	24.9038	24.7649	25.6254	25.2142	24.738	24.5045	24.9781	24.93	24.3802
Glyma.11G108500.1	S731	1	Cold	StatsSet	23.1539	23.3349	23.456	23.3492	23.2985	23.3098	23.2466	23.3966	23.3449	23.7105	23.0362	0.0109324	0.00308929	24.1428	22.593	22.7258	0	24.3078	22.7655	22.9315	0	24.746	22.9502	22.6717	0	24.2701	23.1566	22.6208	0	24.1678	23.0498	22.6779	0	23.9129	23.4665	22.55	0	23.7784	23.0887	22.8727	0	23.6147	24.1277	22.4473	0
Glyma.11G108500.1	S731	1	Control	StatsSet	23.4226	23.2883	23.6355	23.8511	23.8707	23.8043	23.5137	23.6378	23.6893	23.6699	23.4776	0.0109324	0.00308929	23.6171	23.6972	22.9535	0	23.8378	23.4183	22.6087	0	24.0107	23.6316	23.2643	0	24.1269	23.7802	23.646	0	23.9439	23.2756	24.3928	0	24.0331	23.7327	23.647	0	23.7014	23.6642	23.1755	0	23.706	24.1823	23.0251	0
Glyma.11G108500.1	S777	1	Cold	StatsSet	26.4788	26.4076	26.7494	26.6753	26.5313	26.4918	26.4824	26.3692	26.5475	26.5689	26.4296	6.72e-07	3.95e-07	26.2927	27.1879	25.67	26.7645	25.555	26.6416	26.263	27.1706	25.6421	27.2568	26.6256	27.4732	26.0797	26.9928	26.157	27.4718	26.0137	26.7474	26.1972	27.167	25.9169	26.8804	26.2322	26.9375	26.1265	26.8111	25.9987	26.9933	25.5091	27.0747	25.9361	26.9569
Glyma.11G108500.1	S777	1	Control	StatsSet	26.0778	26.1429	26.3541	25.9325	25.9913	25.9386	26.1124	25.8393	26.1379	26.0744	25.9438	6.72e-07	3.95e-07	25.7348	26.6952	25.6273	26.254	26.208	26.6891	25.2067	26.4679	26.7206	26.7634	25.9771	25.9552	26.0247	26.346	25.3353	26.024	25.9123	26.7896	25.0469	26.2163	25.46	26.813	25.3766	26.105	26.1647	26.719	26.2554	25.3106	25.7503	26.6788	25.3922	25.536
Glyma.11G114600.1	S189	1	Cold	StatsSet	25.0107	25.3611	25.2034	24.8638	24.7787	24.6231	24.6372	24.4665	24.6838	24.7757	25.0455	6.72e-13	1.46e-12	25.028	25.2582	24.9185	24.8382	25.7085	25.2029	25.4514	25.0817	25.3301	25.2366	25.4082	24.8388	25.1418	25.0705	24.9364	24.3064	25.0433	25.1415	24.264	24.6659	24.9344	24.6969	24.6567	24.2044	25.111	24.4482	24.7778	24.2118	24.6158	24.8966	24.0928	24.2609
Glyma.11G114600.1	S189	1	Control	StatsSet	25.6291	25.487	25.348	25.7402	25.457	25.5022	25.4319	25.4583	25.5239	25.1863	25.1696	6.72e-13	1.46e-12	25.7822	25.5546	25.8309	25.3487	25.7072	25.1793	25.57	25.4913	25.7916	24.6163	25.6507	25.3335	26.0937	25.5818	25.4389	25.8463	25.4897	24.8012	25.7224	25.8148	25.3987	24.9558	25.9962	25.658	25.7632	25.2457	25.7578	24.9609	25.6395	25.2137	25.426	25.5539
Glyma.11G140600.1	S408	1	Cold	StatsSet	27.958	27.1339	27.288	27.0413	26.7738	26.5716	26.7537	25.9285	25.6513	25.7614	27.8581	0.292243	0.0626575	28.392	28.7551	27.5117	27.173	26.0463	26.879	27.6561	27.954	25.9934	27.5618	27.2658	28.3312	26.9341	27.3451	26.3885	27.4976	26.6408	27.0102	26.8192	26.625	26.179	27.197	26.722	26.1884	26.0338	26.9871	26.5973	27.3969	24.406	25.9153	26.4735	26.9192
Glyma.11G140600.1	S408	1	Control	StatsSet	27.8304	27.5482	27.0876	27.0512	26.4631	26.9772	26.6642	26.8908	26.2481	26.7077	27.154	0.292243	0.0626575	27.8251	27.9559	28.5869	26.9535	27.4982	27.8344	28.6387	26.2216	0	27.6018	27.527	26.1341	27.3444	27.0802	27.7545	26.0257	27.1059	26.5841	26.6527	25.5096	26.3068	27.494	27.9216	26.1865	27.3237	26.8672	26.854	25.6118	27.1432	26.4398	28.1093	25.8707
Glyma.11G190900.1	S71	1	Cold	StatsSet	23.0735	23.3758	23.6766	23.8846	24.1608	24.0628	23.0323	23.7214	23.69	23.6107	23.2623	0.902812	0.17214	23.2087	23.2289	0	22.7829	23.5436	23.2351	0	23.3486	24.1032	23.2302	23.6964	0	24.0373	23.693	23.9236	0	24.6403	23.7379	24.1042	0	24.2433	23.904	24.0411	0	24.5891	23.7894	24.1132	19.6376	23.993	23.7506	23.4204	0
Glyma.11G190900.1	S71	1	Control	StatsSet	24.3018	23.8884	24.2132	23.4217	23.4867	22.9649	23.2473	23.3067	23.1745	22.9059	24.2516	0.902812	0.17214	24.9854	24.2544	23.8584	24.1088	24.2539	23.46	23.9589	23.8811	23.972	23.6161	24.217	25.048	24.0275	23.1374	23.073	23.4491	24.0028	23.3102	23.1446	23.489	22.76	22.7975	22.8234	23.4786	23.5055	22.9601	22.8263	23.6973	23.5665	23.3284	23.2654	23.0666
Glyma.11G195900.1	S88	1	Cold	StatsSet	26.9607	26.8382	26.8504	26.7137	26.9241	26.7442	26.6363	26.8053	26.82	26.7997	26.8053	0.849317	0.162955	26.828	26.9906	27.0634	0	27.1815	26.9324	26.4009	0	26.893	26.9441	26.714	0	26.7248	26.6714	26.7449	0	27.1252	26.7236	26.9235	0	27.0122	26.7906	26.4298	0	26.7834	26.763	26.3625	0	26.7024	27.0259	26.6876	0
Glyma.11G195900.1	S88	1	Control	StatsSet	26.8205	26.6462	26.8573	26.9217	26.8124	26.783	26.8767	26.7645	26.8433	26.7216	26.7598	0.849317	0.162955	27.0838	26.8092	26.5686	0	26.7609	26.5344	26.6434	0	27.0554	26.5952	26.9213	0	27.0696	26.8072	26.8884	0	27.0473	26.7229	26.6668	0	26.8538	27.0046	26.4907	0	26.984	26.9519	26.694	0	27.0708	26.6686	26.554	0
Glyma.11G210100.1	S501	1	Cold	StatsSet	22.9791	23.0302	22.7405	23.0492	23.0455	23.1879	22.8844	22.9205	23.1893	23.0751	22.7677	1.48e-12	3.13e-12	22.8196	23.2009	22.9169	0	23.3054	22.7023	23.0131	23.0999	21.6779	23.2285	22.9753	23.0803	23.1278	22.9927	23.0646	23.0117	23.0418	23.3545	22.7401	0	23.1642	23.1809	23.2187	0	23.052	22.8434	22.7578	0	22.8863	23.0368	22.8384	0
Glyma.11G210100.1	S501	1	Control	StatsSet	22.2853	22.2466	22.538	22.4034	22.233	22.3553	22.4888	22.3098	22.2471	22.4287	22.1964	1.48e-12	3.13e-12	0	22.098	22.4495	22.3086	22.3364	22.7848	22.345	21.5203	22.5164	22.3301	22.9754	22.3301	22.2005	22.4538	22.6211	22.3381	22.449	22.2803	21.7423	22.4603	22.4816	22.5883	22.2646	22.0868	22.707	22.628	22.38	22.2402	22.4357	22.5755	22.1066	22.1215
Glyma.11G237500.1	S654	1	Cold	StatsSet	25.984	26.3425	26.3442	26.017	26.4865	26.3316	26.226	26.0814	26.3838	26.2054	26.4604	0.199614	0.0438905	25.18	25.4168	27.3553	0	26.7484	25.3764	26.9026	0	26.3612	25.4324	27.2388	0	26.253	24.3871	27.4108	0	26.484	25.4105	27.5652	0	26.1987	24.9568	27.8392	0	25.9465	25.3393	27.3923	0	26.2669	24.7808	27.1964	0
Glyma.11G237500.1	S654	1	Control	StatsSet	26.3288	26.4361	26.1013	25.9788	26.4593	26.3059	26.2662	24.2596	24.3486	26.2709	26.5083	0.199614	0.0438905	26.1575	25.6952	27.1337	0	25.7327	26.0405	27.5352	0	25.1908	25.2792	27.8339	0	26.46	24.2495	27.2267	0	26.4097	25.5108	27.4576	0	26.3388	25.5846	26.9943	0	26.1867	25.3687	27.243	0	25.9887	19.6652	27.125	0
Glyma.11G248200.1	S25	1	Cold	StatsSet	22.8193	22.6488	22.3936	22.8255	22.6251	22.8699	22.738	22.4272	22.9411	22.1325	22.908	3.41e-11	4.61e-11	22.4512	23.2752	22.7317	0	22.6967	22.5218	22.7278	0	22.341	22.564	22.2758	0	22.5679	22.5646	23.3441	0	22.2963	22.7303	22.8486	0	23.0555	22.7162	22.8379	0	23.0876	22.2454	22.881	0	22.0877	22.3113	22.8825	0
Glyma.11G248200.1	S25	1	Control	StatsSet	22.0864	22.0182	22.0754	22.0459	21.8559	22.2088	22.1497	21.7641	21.5311	21.882	21.6378	3.41e-11	4.61e-11	21.4258	22.3584	22.4749	0	22.1726	22.2056	21.6763	0	22.0875	22.0569	22.0817	0	21.9688	21.7869	22.382	0	21.9882	22.227	21.3526	0	22.3242	22.0595	22.2428	0	21.9548	22.2918	22.2024	0	21.9225	21.4486	21.9211	0
Glyma.12G010300.1	T881	1	Cold	StatsSet	22.9391	23.2402	22.6852	22.8545	22.8655	23.2061	23.1063	23.0763	23.4585	23.2622	23.2287	0.00202335	0.000623974	21.9747	23.1609	23.6817	0	23.0983	23.4659	23.1564	0	21.9065	22.7583	23.3908	0	22.312	22.5805	23.671	0	22.6482	23.2895	22.6589	0	22.7826	22.957	23.8787	0	22.4194	23.4153	23.484	0	23.068	23.1374	23.0234	0
Glyma.12G010300.1	T881	1	Control	StatsSet	23.0048	23.0823	23.597	23.3745	23.7067	23.3277	23.9736	23.5212	23.7191	23.3555	23.2549	0.00202335	0.000623974	22.9074	22.9713	23.1358	0	22.6263	23.3938	23.2269	0	23.9715	23.5482	23.2713	0	22.9467	23.4721	23.7047	0	23.2638	24.0304	23.8259	0	24.0775	22.8394	23.0661	0	24.1914	23.8148	23.9147	0	23.5777	23.4969	23.4891	0
Glyma.12G020400.1	S692	1	Cold	StatsSet	24.784	24.8279	24.6814	24.3643	24.6716	24.6477	24.7125	24.4778	24.7895	24.6884	24.7194	0.68948	0.136555	25.2963	24.2189	24.8366	0	25.2529	24.4283	24.8025	0	25.5642	24.4164	24.6537	24.0914	24.7886	24.0143	24.5344	24.1199	25.569	24.0182	24.4277	0	25.3182	24.2714	24.7717	24.2293	25.706	24.7953	24.7364	23.6123	25.0819	24.6572	24.4899	23.6823
Glyma.12G020400.1	S692	1	Control	StatsSet	24.3145	24.6306	24.5562	24.5574	24.7372	24.822	24.4645	24.6664	24.5564	24.5502	24.7978	0.68948	0.136555	24.8109	23.9192	23.933	24.595	24.9434	24.1555	24.2122	25.2112	0	24.0206	24.4484	25.1995	24.7254	24.2533	24.3307	24.9203	24.9546	24.7367	23.9368	25.3209	24.9053	25.0517	24.2317	25.0995	24.3133	24.1152	24.5299	24.8995	24.78	24.6953	24.4615	24.7288
Glyma.12G028300.1	S2	1	Cold	StatsSet	25.149	25.037	25.1909	25.0308	25.0137	25.4311	25.4347	25.3373	25.5534	25.6102	25.1446	0.000110953	4.19e-05	26.171	24.8649	25.2321	24.328	26.3303	24.9903	24.2898	24.5375	26.797	25.5293	24.1469	24.2906	26.551	25.0636	24.3326	24.1757	26.3797	24.5346	24.6618	24.4789	26.5415	25.1935	24.7894	25.1998	26.1212	25.8675	24.8743	24.8757	26.4681	25.1143	24.6899	25.077
Glyma.12G028300.1	S2	1	Control	StatsSet	25.6216	25.4652	25.5867	25.9098	26.2085	25.7882	25.5538	25.6732	25.549	25.6969	25.6437	0.000110953	4.19e-05	26.1433	25.0861	25.1541	26.1028	26.005	25.2921	24.8749	25.689	25.5072	25.6214	25.1441	26.0741	26.3398	25.5366	25.7232	26.0396	25.9805	25.6903	27.0838	26.0794	26.0583	25.6649	25.3459	26.0835	26.0323	24.9939	25.0994	26.0897	26.0478	25.2598	25.375	26.0102
Glyma.12G036400.1	S92	1	Cold	StatsSet	26.1224	25.1989	25.6548	26.0659	26.1026	26.0844	25.9943	26.254	26.4957	26.4847	25.7916	0.0251774	0.0067745	25.0809	26.7566	26.5296	0	23.407	26.1289	26.0609	0	24.0782	26.5589	26.3273	0	24.72	26.94	26.5378	0	24.3132	27.2764	26.7181	0	24.0669	27.335	26.8514	0	24.4124	26.9148	26.6556	0	24.7436	27.0222	26.9961	0
Glyma.12G036400.1	S92	1	Control	StatsSet	26.1652	25.7503	25.2677	25.8794	25.4009	25.5607	25.7559	25.6716	25.3012	25.6111	25.8509	0.0251774	0.0067745	25.5129	26.5929	26.3897	0	25.2047	25.5576	26.4885	0	23.8241	25.7085	26.2706	0	26.0705	26.3372	25.2306	0	25.0612	25.9362	25.2054	0	25.1669	25.6456	25.8696	0	25.148	26.3873	25.7325	0	25.3011	26.094	25.6197	0
Glyma.12G059700.1	S604	1	Cold	StatsSet	25.4491	26.1187	26.2859	26.0217	24.6376	25.7648	25.2622	25.3936	25.3771	25.4428	25.7271	6.06e-07	3.62e-07	26.6579	25.5527	0	24.1367	26.6977	25.451	26.2075	0	26.7828	26.1622	25.9126	0	26.7566	26.0394	25.6091	25.6816	26.816	25.6176	21.4793	0	25.9219	26.2016	26.1964	24.7394	24.8726	25.948	0	24.9661	24.3201	25.8307	26.0299	0
Glyma.12G059700.1	S604	1	Control	StatsSet	26.6057	26.5159	26.4361	26.385	26.6233	26.3151	26.0509	26.0992	26.292	26.2902	26.9249	6.06e-07	3.62e-07	0	27.0519	26.3686	26.3966	26.4931	26.7165	26.338	0	26.1211	26.8778	26.3176	26.4279	26.5619	26.7413	26.3457	25.8909	27.1099	26.5559	26.7373	26.0902	26.6175	26.7853	26.1014	25.7563	26.3629	26.5258	25.6738	25.6413	26.6955	26.7013	25.75	25.25
Glyma.12G059700.1	S653	1	Cold	StatsSet	24.1984	24.0563	24.1998	24.0869	24.0119	24.0964	22.5969	23.9798	23.9455	23.8528	24.0413	4.33e-05	1.79e-05	25.381	24.0948	24.1429	23.175	25.5739	23.5359	23.4819	23.6335	25.8521	24.0257	23.5935	23.3278	25.4142	24.0158	23.3632	23.5544	25.1587	23.6601	23.8059	23.4231	24.6212	24.1459	24.1083	23.5103	24.2901	18.7387	23.6976	23.6615	24.5542	24.1014	23.4076	23.8561
Glyma.12G059700.1	S653	1	Control	StatsSet	24.5234	24.5903	24.3754	24.6604	25.1661	24.5385	24.4238	24.6487	24.2702	24.6575	24.5766	4.33e-05	1.79e-05	25.0048	24.6603	24.5482	23.8805	25.0119	24.7122	24.4051	24.2322	24.3257	24.9888	24.0258	24.1612	25.1948	24.8678	24.3787	24.2002	25.5237	24.8424	25.8831	24.4153	25.1828	24.7184	24.196	24.0568	24.7639	24.7865	23.5737	24.5711	24.7224	25.2306	24.1745	24.4672
Glyma.12G060600.1	S210	1	Cold	StatsSet	25.0481	24.4301	24.3807	24.5276	24.1419	23.9824	24.3406	24.1433	24.0155	23.9862	24.7351	0.626556	0.125939	24.8754	25.0228	24.8188	25.4753	22.6816	24.5333	24.653	25.8527	23.0607	24.6117	24.4622	25.3884	23.5352	24.8964	24.3455	25.3333	23.1079	24.6109	24.075	24.7738	23.5169	24.5589	23.8715	0	23.4972	24.3478	24.3296	25.1877	23.1629	24.7232	24.1469	24.5402
Glyma.12G060600.1	S210	1	Control	StatsSet	24.8427	24.6101	24.5732	24.0703	23.9771	24.1697	24.2106	24.3315	24.5053	24.4491	24.6283	0.626556	0.125939	24.0184	25.3613	25.2182	24.773	24.2236	24.7558	24.8381	24.6229	24.4472	24.6165	24.7476	24.4816	24.0761	24.6519	23.7038	23.8493	24.0611	23.9159	23.3819	24.5493	23.3498	23.9824	24.4894	24.8573	23.9568	24.6571	23.8334	24.3951	23.8487	24.8904	24.337	24.2498
Glyma.12G060600.1	T300	1	Cold	StatsSet	21.942	22.2148	22.241	22.3772	22.1419	22.2816	22.208	22.0743	21.1678	22.5411	22.2965	0.917938	0.173654	23.3188	21.8691	21.6617	20.9185	23.1532	22.5303	22.0107	21.1652	23.6011	22.1682	21.8341	21.3606	23.2209	22.3143	22.4618	21.5119	22.7191	0	22.022	21.6845	23.4609	22.3195	22.1657	21.1804	23.1653	22.6337	21.6903	21.3429	22.8251	22.3204	21.8452	21.3066
Glyma.12G060600.1	T300	1	Control	StatsSet	22.3962	22.4677	22.2547	22.0903	22.309	21.578	21.9602	22.0884	21.8	22.094	22.3576	0.917938	0.173654	0	22.4363	22.0243	22.7279	22.5572	22.4646	21.5189	23.3302	21.8783	22.4905	21.4043	23.2457	22.5466	21.644	21.766	22.4047	22.1625	22.5219	22.7187	21.8327	21.2496	21.5047	21.3195	22.2384	22.3014	22.4534	21.04	22.0461	22.0934	22.2176	22.0095	22.0332
Glyma.12G064100.1	S408	1	Cold	StatsSet	27.0132	26.6386	26.8999	26.6595	26.1259	25.8788	25.8343	25.7186	24.9791	25.4181	27.1726	0.0402816	0.0103835	25.4392	28.2941	26.9333	27.3863	23.9105	27.3193	27.2309	28.0939	23.7492	28.4187	26.8732	28.5583	24.964	27.7649	26.1306	27.7786	24.6139	26.5008	26.8196	26.5694	23.1921	27.4286	26.6272	26.2674	23.0644	26.4762	26.1519	27.6447	22.3452	25.935	27.3059	27.2883
Glyma.12G064100.1	S408	1	Control	StatsSet	26.6783	26.4475	25.4412	26.1948	25.456	26.1143	24.6954	25.6527	25.478	26.0872	25.9645	0.0402816	0.0103835	25.0063	27.7744	28.0526	25.8801	24.4261	27.3352	28.2348	25.7939	22.6109	27.2695	27.2179	24.6666	24.6265	27.067	27.4523	25.6334	24.0499	26.5739	26.3603	24.8399	24.6983	27.2272	27.45	25.0816	24.2034	22.0726	26.8467	25.659	23.6431	26.1557	27.2871	25.5249
Glyma.12G103900.1	S106	1	Cold	StatsSet	24.2428	23.8077	24.0387	23.8848	24.1181	23.8429	23.9285	23.7645	23.6171	22.9027	24.1296	0.000403793	0.0001413	24.8044	23.8591	24.0649	0	23.9933	23.7518	23.6778	0	24.6418	23.4739	24.0005	0	24.2817	23.7433	23.6294	0	24.7448	23.5129	24.0968	0	24.2658	23.6113	23.6515	0	24.2243	23.5291	24.0319	0	23.8929	23.7018	23.6988	0
Glyma.12G103900.1	S106	1	Control	StatsSet	24.3909	24.257	24.0606	24.2727	24.566	23.8832	24.0656	24.2703	24.0007	24.1908	24.0451	0.000403793	0.0001413	24.4768	24.4719	24.224	0	24.6369	24.2925	23.8417	0	24.1611	24.4531	23.5678	0	24.6273	24.0766	24.1141	0	24.0996	24.5461	25.0522	0	24.0097	23.7357	23.9042	0	24.2104	24.1409	23.8455	0	24.023	24.0714	24.7166	0
Glyma.12G129800.1	S5	1	Cold	StatsSet	26.7096	24.7316	26.2645	25.6218	25.3787	25.6331	26.0678	26.2326	26.0612	26.2059	27.0444	0.000216153	7.77e-05	24.8757	27.1293	27.3571	27.4762	19.6419	26.5135	25.7519	27.0191	0	26.0388	26.1031	26.6517	23.452	26.294	26.298	26.443	24.0947	26.4125	25.0275	25.9802	23.9512	26.5831	0	26.3651	24.5238	26.3528	26.8155	26.5792	24.8109	26.469	26.9462	26.7041
Glyma.12G129800.1	S5	1	Control	StatsSet	25.0625	25.2267	24.3093	24.8716	24.6486	25.2848	25.9426	25.6023	25.405	25.0406	24.8853	0.000216153	7.77e-05	22.8448	26.6166	26.2258	24.5627	24.9366	25.7896	26.0376	24.1429	20.8499	25.969	25.7687	24.6497	22.7024	26.4973	25.9774	24.3093	23.6198	25.6232	24.6214	24.7303	25.9272	24.2076	26.0771	24.9271	25.6908	25.2174	26.569	26.2931	0	25.6289	25.6736	25.5042
Glyma.12G161300.1	S11	1	Cold	StatsSet	27.0118	26.3288	26.429	26.2907	26.8143	26.5743	26.6617	27.0307	26.9187	26.7202	26.7197	0.000157092	5.77e-05	26.2605	27.2735	0	27.5015	25.652	25.9302	0	27.4043	25.8784	25.884	0	27.5245	25.9046	25.9961	0	26.9715	25.8402	27.0981	0	27.5047	26.2729	26.7118	0	26.7381	25.3579	26.823	0	27.8041	26.6313	26.421	0	28.0398
Glyma.12G161300.1	S11	1	Control	StatsSet	26.4506	25.6405	26.0246	25.9619	25.5983	25.8267	26.4508	26.5903	26.1089	25.7723	25.5514	0.000157092	5.77e-05	26.6241	26.953	0	25.7746	25.678	25.9788	0	25.2645	25.9979	26.2627	0	25.8132	25.7522	26.613	0	25.5205	25.372	25.5763	0	25.8464	26.7087	24.9591	0	25.8123	26.6382	25.4693	0	27.245	27.0907	26.4143	0	26.2659
Glyma.12G166100.1	Y242	1	Cold	StatsSet	23.2273	23.0414	23.0024	22.94	23.2684	23.1707	22.8865	22.9562	22.9458	23.265	22.9594	2.41e-07	1.52e-07	23.9888	22.9266	22.7666	0	23.9413	23.0147	0	22.1682	24.4546	0	22.4416	22.1111	24.1207	22.6146	22.4836	22.5412	23.9446	0	23.1683	22.6923	23.8075	22.8015	22.9029	0	23.1364	23.3269	0	22.1962	23.8908	22.8303	22.5132	22.5905
Glyma.12G166100.1	Y242	1	Control	StatsSet	23.9623	23.6331	23.6317	23.6167	23.8184	23.6942	23.557	23.6858	23.4174	23.6886	23.6379	2.41e-07	1.52e-07	24.1918	24.0764	23.3608	24.2201	23.9718	23.5777	23.0827	23.9002	0	23.6966	23.0088	24.1897	24.1664	22.442	23.3632	24.4952	23.8042	23.5555	23.9799	23.9338	23.6762	23.7617	23.3292	24.01	23.8128	23.5422	22.8289	24.044	23.9804	23.643	23.267	23.8528
Glyma.12G171700.1	S57	1	Cold	StatsSet	25.3352	24.654	25.5895	25.8341	25.6988	25.6489	25.6245	25.5941	25.76	25.7698	25.3277	8.08e-06	3.81e-06	24.614	25.0342	25.9411	25.7514	24.9015	25.0259	27.0121	21.6766	24.9997	25.2626	26.5062	0	24.644	25.428	27.4116	25.853	24.9322	25.6789	26.1827	26.0016	25.0566	25.3239	26.3493	25.8656	25.4942	25.514	26.0756	25.4143	25.6229	25.7661	26.0425	24.9448
Glyma.12G171700.1	S57	1	Control	StatsSet	24.8568	24.9746	25.3184	24.6675	24.8271	24.669	25.1104	24.9707	24.8411	24.4257	25.3335	8.08e-06	3.81e-06	24.5301	24.5062	25.8054	24.5855	24.7769	24.5077	25.4204	25.1934	24.8997	24.3772	26.1142	25.8823	24.6138	24.8872	24.7835	24.3854	24.5763	24.3272	25.2924	25.1127	24.3204	24.803	24.8416	24.7111	24.9978	24.8547	25.7636	24.8255	24.7829	25.2643	25.2624	24.5734
Glyma.12G181400.1	T110	1	Cold	StatsSet	26.4607	25.8533	26.9124	27.2817	26.8538	27.0791	26.7865	26.7955	27.2796	27.0174	27.1597	1.11e-14	3.13e-14	25.3163	28.0839	25.9818	0	24.5825	28.6039	28.876	21.3507	24.0517	28.1263	28.3043	27.1672	25.5553	28.2904	27.9806	27.3005	25.2076	28.2705	27.7233	26.214	25.5922	27.7186	27.9264	0	25.8983	27.9439	27.1813	26.1224	25.4164	28.2179	27.7524	25.7953
Glyma.12G181400.1	T110	1	Control	StatsSet	24.7529	24.7667	24.529	24.1179	24.1677	24.5403	24.1063	24.5476	24.8795	24.8921	24.032	1.11e-14	3.13e-14	23.798	25.4645	25.6059	24.1431	23.4258	24.9846	26.3163	24.3401	0	25.0639	24.4964	24.0268	24.1629	23.4504	24.7403	0	23.592	24.9406	24.3657	23.7726	23.2619	24.8865	25.4258	24.587	24.4372	25.8684	23.0084	23.1114	23.2446	24.9995	25.5591	24.3874
Glyma.12G194000.1	S34	1	Cold	StatsSet	25.093	25.2588	25.0395	25.4263	25.0544	25.3891	25.8975	25.8403	25.9378	25.9452	24.9038	2.14e-22	2.89e-21	24.5807	25.1392	25.2878	25.3644	24.4703	25.0362	26.0477	25.4811	24.5696	24.9269	25.2048	25.4569	25.0688	25.1981	25.7669	25.6713	24.8452	24.8957	25.5309	24.9458	25.2089	25.6959	25.0632	25.5884	25.824	25.8024	25.7759	26.1876	25.9136	25.326	26.2177	25.904
Glyma.12G194000.1	S34	1	Control	StatsSet	23.5695	23.9996	24.2938	24.0194	23.6356	24.6589	24.3652	24.1406	24.8915	24.7935	23.8496	2.14e-22	2.89e-21	22.8138	23.7741	24.2563	23.4336	23.9735	23.5317	24.8935	23.5998	24.0645	23.8421	24.3576	24.911	23.5993	24.3772	24.057	24.0439	23.6209	24.1268	22.9979	23.797	24.1665	24.5283	25.1238	24.8171	23.9486	24.1145	25.3978	24	23.4194	23.8806	25.0028	24.2595
Glyma.12G205100.1	S447	1	Cold	StatsSet	19.8745	19.9619	19.6918	19.8784	19.7814	19.6289	20.1835	19.9412	20.0085	20.0912	19.8783	2.44e-09	2.38e-09	20.1349	19.1991	20.0768	20.087	20.111	20.2049	19.4119	20.1197	20.1903	19.4742	19.1732	19.9296	20.6085	20.2044	19.3499	19.3507	19.9503	19.6108	0	19.7831	20.298	19.8294	19.0526	19.3356	20.6444	20.2884	20.0298	19.7713	20.7606	19.4867	19.5986	19.919
Glyma.12G205100.1	S447	1	Control	StatsSet	20.5128	20.6692	20.9655	20.2041	21.011	20.8162	21.0233	20.6507	20.5586	20.3691	20.9108	2.44e-09	2.38e-09	21.2592	20.5221	19.8511	20.4189	20.9777	20.7734	20.3448	20.5811	21.4181	21.1029	20.2065	21.1346	21.1009	21.146	20.7275	17.8421	20.8925	21.2508	21.194	20.7067	21.9059	20.0126	20.53	0	21.6243	19.9333	20.8872	21.6485	21.2868	20.3167	20.1098	20.8893
Glyma.12G234300.1	S353	1	Cold	StatsSet	26.0398	26.1322	26.1801	25.9093	26.2252	26.0803	26.0931	26.1029	26.3296	26.7237	26.0258	1.63e-08	1.32e-08	27.2163	25.3908	25.835	25.7173	27.3178	25.6416	26.0859	25.4835	27.6045	25.9769	25.7539	25.3852	27.0612	25.4347	25.5933	25.5481	27.3755	25.959	25.7059	25.8604	27.2029	25.9342	25.4839	25.7002	27.3729	26.0226	26.0178	24.9592	27.6705	26.0049	25.7507	24.9856
Glyma.12G234300.1	S353	1	Control	StatsSet	26.5504	26.5941	26.5341	26.7593	26.8392	27.1411	26.8328	26.6888	26.8638	26.7188	26.6993	1.63e-08	1.32e-08	27.5136	26.0836	26.0128	26.5914	27.4404	26.3021	25.9578	26.6761	27.3918	26.1659	26.0725	26.5062	27.4608	26.0734	26.586	26.9169	27.492	26.2246	26.1334	27.5068	27.5696	26.866	26.7094	27.4195	27.5627	26.3507	26.1829	27.2347	27.3773	26.3005	26.0694	27.008
Glyma.12G235000.1	S728	1	Cold	StatsSet	24.8356	24.6537	24.9776	24.9455	25.1523	24.9992	25.0728	24.9269	25.0514	25.2234	24.7168	0.216625	0.047194	24.8731	24.6993	25.173	24.597	25.3567	24.1094	24.3176	24.8312	25.3362	24.8903	24.7424	24.9416	24.9126	24.8795	24.7698	25.2201	25.598	24.7999	25.1078	25.1036	25.033	25.0076	24.8732	25.0828	25.2002	24.955	25.3814	24.7548	25.0612	25.1604	24.9144	24.5717
Glyma.12G235000.1	S728	1	Control	StatsSet	24.9466	25.0842	25.3816	25.0279	25.0514	25.0312	25.0496	24.8773	24.8697	24.7985	25.2649	0.216625	0.047194	25.2121	24.9571	24.6445	24.9727	25.1846	24.9396	25.1068	25.1058	25.1759	25.0561	25.6163	25.6782	25.2222	25.1277	24.7704	24.9913	25.1147	25.3594	24.6621	25.0694	25.2011	25.3494	25.0622	24.512	24.978	24.7937	25.6452	24.7813	25.2059	25.0773	24.4547	24.7715
Glyma.12G237000.1	S118	1	Cold	StatsSet	23.8395	23.8663	23.4726	23.8547	23.3475	23.7558	24.0851	23.9502	24.001	23.7795	23.8332	0.018696	0.00517485	22.4979	0	24.372	24.6486	22.8384	23.8238	24.0387	24.7645	22.448	23.5543	0	24.4154	22.7544	23.7536	24.5182	24.3928	22.1477	23.9592	23.0075	24.2755	23.1347	23.8017	0	24.331	23.5976	23.8675	24.5416	24.3335	23.3509	23.8485	23.8203	24.7809
Glyma.12G237000.1	S118	1	Control	StatsSet	23.5288	23.463	23.6103	23.3497	23.0624	23.6616	24.0351	23.3609	23.7845	23.6077	23.414	0.018696	0.00517485	23.3411	23.5891	24.0546	23.1303	23.4034	23.8868	23.8423	22.7195	23.744	23.8647	23.8883	22.9443	22.9898	23.7845	23.768	22.8564	22.7686	23.2699	23.1283	23.0831	24.0602	22.934	24.007	23.6452	24.3355	23.2858	24.4958	24.0231	23.3849	22.9535	23.5822	23.5229
Glyma.12G237000.1	S153	2	Cold	StatsSet	25.7129	25.5538	25.7989	25.5761	25.5973	25.7635	25.7709	25.2919	25.5354	25.0864	25.6327	5.73e-11	7.44e-11	24.7207	26.1878	25.8559	26.087	24.2403	25.7259	25.8765	26.3726	24.6247	26.0311	26.2099	26.3297	24.6407	25.726	25.794	26.1437	24.4683	25.9188	26.5132	25.4889	24.6809	26.1134	26.1438	26.116	24.5472	25.8298	26.2473	26.4593	24.5067	25.2065	26.1625	0
Glyma.12G237000.1	S153	2	Control	StatsSet	24.7942	24.6506	24.4057	24.4271	24.2578	25.0554	24.5529	24.6046	24.7358	25.1869	23.807	5.73e-11	7.44e-11	23.8711	25.058	25.5675	24.6802	24.011	25.1989	25.2381	24.1545	23.6254	24.8455	24.8231	24.3289	23.645	25.2107	24.8382	24.0145	23.8963	24.7025	24.1319	24.3005	23.9844	25.3394	25.7227	25.175	24.2322	25.0872	0	24.3391	23.9997	24.3791	25.3671	24.6727
Glyma.12G237000.1	S160	1	Cold	StatsSet	27.0124	27.1611	27.3509	27.3746	27.1714	27.3254	26.3176	27.3052	27.2727	26.9168	27.1516	1.16e-08	9.83e-09	26.54	0	27.1998	27.2973	25.7227	27.0276	27.8423	28.052	26.4303	27.412	27.6039	27.9573	26.7501	27.2904	27.6445	27.8135	26.1157	27.5787	27.7915	27.1998	26.6015	27.6782	27.3832	27.6387	21.6405	27.7556	27.8557	28.0187	26.5335	27.1851	27.5578	27.9443
Glyma.12G237000.1	S160	1	Control	StatsSet	26.0347	26.0895	26.1465	25.7188	25.5513	26.1915	25.9579	26.1875	26.0591	26.5633	25.9272	1.16e-08	9.83e-09	25.1188	26.2959	26.6894	0	25.4816	26.4763	26.4975	25.9026	25.3758	26.4018	26.6094	26.1988	25.1565	26.4153	0	25.5846	25.3147	0	25.3859	25.9532	25.3288	26.5415	0	26.7041	25.4887	26.2534	26.0392	26.0504	0	25.7052	26.8374	26.0198
Glyma.12G237000.1	S160	2	Cold	StatsSet	25.7129	25.5538	25.7989	25.3869	25.5973	25.7635	25.5414	25.2919	25.5354	25.0864	25.6327	5.32e-10	5.89e-10	24.7207	26.1878	25.8559	26.087	24.2403	25.7259	25.8765	26.3726	24.6247	26.0311	26.2099	26.3297	24.6407	25.726	25.794	0	24.4683	25.9188	26.5132	25.4889	24.6809	26.1134	26.1438	26.116	24.5472	25.8298	26.2473	0	24.5067	25.2065	26.1625	0
Glyma.12G237000.1	S160	2	Control	StatsSet	24.7942	24.6506	24.4313	24.4271	24.2578	25.0554	24.5529	24.6046	24.7358	25.1869	23.807	5.32e-10	5.89e-10	23.8711	25.058	25.5675	24.6802	24.011	25.1989	25.2381	24.1545	23.6254	24.8455	24.8231	0	23.645	25.2107	24.8382	24.0145	23.8963	24.7025	24.1319	24.3005	23.9844	25.3394	25.7227	25.175	24.2322	25.0872	0	24.3391	23.9997	24.3791	25.3671	24.6727
Glyma.12G237000.1	S189	1	Cold	StatsSet	24.6065	24.3491	24.5516	24.2919	24.6427	25.5615	24.4551	24.2697	24.6278	25.5626	24.2918	6.52e-05	2.57e-05	25.5662	25.7841	25.7903	21.2852	25.4976	25.3011	25.467	21.1308	25.6616	25.3325	25.7893	21.423	25.6036	24.778	25.5195	21.2663	25.5128	25.2836	25.9231	21.8515	25.5617	25.3834	25.8805	25.4202	25.5102	25.5092	26.2333	20.5677	25.7578	25.0916	25.2161	21.0133
Glyma.12G237000.1	S189	1	Control	StatsSet	25.7887	25.7125	25.6083	25.7	25.3853	26.0417	25.6739	25.8429	25.8756	25.9073	25.7102	6.52e-05	2.57e-05	25.8446	25.378	26.0398	25.8927	25.7716	25.5726	25.2963	26.2096	0	24.9762	25.5954	26.2533	25.4588	25.3917	25.9147	26.0347	24.9977	25.3012	25.3558	25.8864	25.4322	26.3719	25.9646	26.3982	25.6162	25.4302	26.0097	25.6395	25.5125	25.3628	26.4769	26.0195
Glyma.13G008500.1	S548	1	Cold	StatsSet	22.2653	23.5263	23.2033	23.1848	23.0014	23.1137	23.1658	23.0257	23.1563	23.1772	22.7581	1.85e-08	1.49e-08	22.717	22.0605	22.0183	0	23.4514	23.2115	23.9161	0	22.0415	23.1516	23.3978	24.2223	22.8859	22.8828	23.6388	23.3315	22.4998	23.7716	22.7974	22.9367	23.4262	23.0122	22.6422	23.3741	23.1169	23.4265	0	22.9539	23.251	23.1129	0	22.7133
Glyma.13G008500.1	S548	1	Control	StatsSet	22.5296	22.5618	22.7115	21.9013	22.3245	22.2422	22.1594	21.9845	22.3996	22.1936	22.7384	1.85e-08	1.49e-08	0	22.7181	22.2759	22.595	22.4333	22.8096	22.4426	0	22.6257	22.326	23.0698	22.8245	22.2428	21.6724	22.1481	21.542	22.3219	22.2315	0	22.42	22.0066	22.379	22.0546	22.5284	22.3208	22.9318	21.4942	21.8908	21.6668	22.4197	21.7915	22.0599
Glyma.13G027300.1	S171	1	Cold	StatsSet	25.4265	25.4579	25.1323	25.5826	25.4098	25.3424	25.7516	25.4104	25.7713	25.5122	24.065	0.0794659	0.0191674	24.98	25.8165	25.483	0	24.0915	25.7178	26.5644	0	23.9758	25.4617	25.9594	0	25.0475	25.5209	26.1795	0	24.7383	25.3782	26.113	0	24.9786	25.5553	25.4932	0	25.2821	25.7874	26.1853	0	24.8184	25.604	25.8087	0
Glyma.13G027300.1	S171	1	Control	StatsSet	24.864	25.0695	25.2161	24.8815	24.4998	25.1862	25.3274	25.1026	25.4435	25.5455	25.0212	0.0794659	0.0191674	24.0025	25.374	25.2156	0	24.6418	25.1386	25.4282	0	25.0301	25.1187	25.4996	0	24.6218	24.9364	25.0863	0	24.5901	24.7295	24.1796	0	24.9363	25.0878	25.5346	0	24.7656	25.2251	25.9916	0	24.2516	25.1787	25.8776	0
Glyma.13G075300.1	S291	1	Cold	StatsSet	23.905	22.6073	24.0649	23.8285	23.8676	23.8083	23.691	23.7053	23.75	23.9374	24.1498	0.000255184	9.07e-05	24.8049	23.4234	23.4866	0	24.645	24	0	19.1768	25.1866	23.8576	0	23.1505	24.67	23.7376	0	23.0779	24.4317	23.8937	0	23.2773	24.3221	23.6832	23.7672	23.4605	23.9201	24.1369	0	23.0159	24.3388	24.0937	0	22.6833
Glyma.13G075300.1	S291	1	Control	StatsSet	24.1624	24.3085	24.1281	24.3416	24.5195	24.2436	24.2242	24.1942	24.0494	24.2942	24.1917	0.000255184	9.07e-05	25.1647	23.6764	23.646	0	24.8527	24.3115	23.5255	24.5445	24.2959	24.0268	23.5567	24.633	25.153	23.8428	23.6934	24.677	24.9705	24.3711	24.2276	24.509	24.4114	24.0536	23.7974	24.7119	24.7273	24.5036	23.3821	24.2838	24.7483	24.0431	23.4536	24.5319
Glyma.13G121100.1	S60	1	Cold	StatsSet	23.3293	23.9592	24.1725	24.0693	24.2032	24.2345	24.3112	24.4692	24.3268	24.5548	23.5257	0.000891861	0.000289584	23.2052	23.0775	23.7789	23.2556	23.4872	24.1243	24.2662	0	24.4701	24.022	24.0252	0	23.821	24.2739	24.113	0	24.0235	24.4228	24.1634	0	23.8188	24.3635	24.5211	0	23.9174	24.4457	24.5706	0	24.3273	24.5496	24.5307	0
Glyma.13G121100.1	S60	1	Control	StatsSet	23.4091	23.6913	23.6643	23.7202	24.0449	24.1674	24.1389	23.9303	24.2028	24.2119	23.6874	0.000891861	0.000289584	23.5055	23.2112	23.5188	23.4009	23.9459	23.5667	23.5938	23.6586	0	23.3761	23.7276	23.8893	23.5384	23.8099	23.8395	23.6931	24.0281	23.7466	23.8705	24.5347	23.94	23.8755	24.326	24.5281	24.1647	24.0029	24.2288	24.1593	24.0231	23.5156	23.9914	24.191
Glyma.13G145100.1	S643	1	Cold	StatsSet	24.1846	23.0266	23.264	23.5525	23.8949	24.2216	24.5143	24.5664	24.6964	24.9078	23.2621	3.63e-17	1.75e-16	24.1183	24.2054	24.23	0	23.2747	23.0095	22.9151	22.907	23.7904	23.2876	0	22.714	23.6423	23.4147	23.6006	0	24.4676	23.0674	0	24.1498	24.2941	23.9287	24.442	0	24.867	24.1753	25.0096	24.0053	24.9632	24.3322	24.6547	24.3157
Glyma.13G145100.1	S643	1	Control	StatsSet	24.6459	24.7976	24.963	25.1027	25.0804	24.9113	24.7141	24.6598	24.8009	25.129	24.7915	3.63e-17	1.75e-16	24.9215	24.366	24.225	25.0712	24.7022	24.5895	24.7285	25.17	24.9242	24.6163	25.3087	25.0027	24.9523	24.8746	25.1653	25.4187	24.8564	24.9198	24.9229	25.6226	24.5916	25.1231	24.5965	25.3342	24.7039	24.2088	25.0463	24.8976	24.6044	24.1424	24.9875	24.9048
Glyma.13G161700.1	S197	1	Cold	StatsSet	25.2132	24.3071	24.5315	24.5366	24.322	24.2792	24.4798	24.3821	24.2968	24.689	24.3882	0.00160443	0.000501657	25.1711	24.8938	25.5747	0	23.6484	24.72	24.5529	0	24.7366	24.6838	24.1742	0	24.1092	24.7815	24.719	0	23.8372	24.6188	24.5099	0	23.7528	24.6556	24.4291	0	24.0404	24.343	25.0561	0	23.8625	24.6467	24.637	0
Glyma.13G161700.1	S197	1	Control	StatsSet	24.2394	24.2512	23.9442	24.3424	22.6795	24.3016	24.1663	22.8785	24.1189	24.523	24.0924	0.00160443	0.000501657	23.9349	24.3181	24.4653	0	24.0398	24.3319	24.3819	0	22.7542	24.4109	24.6676	0	24.0349	24.6217	24.3705	0	20.2561	24.085	23.6974	0	24.1015	24.706	24.0972	0	23.3649	24.1865	24.9476	0	20.21	23.8751	24.5502	0
Glyma.13G175200.1	S122	1	Cold	StatsSet	24.3144	24.3001	24.3365	24.3914	24.5622	24.3076	24.4173	24.2723	24.2772	24.6088	24.3847	1.13e-05	5.17e-06	24.906	24.0596	24.6193	23.6726	24.8452	24.6427	24.2458	23.4665	24.9306	24.2865	24.5499	23.5792	25.0063	24.2004	24.6571	23.7017	25.2481	24.312	24.5842	24.1046	24.6234	24.4096	24.1429	24.0544	24.7483	24.7789	24.5281	23.6138	24.6214	24.4906	0	23.705
Glyma.13G175200.1	S122	1	Control	StatsSet	24.6619	24.7979	24.9822	24.936	24.8854	24.5405	24.7971	24.6637	24.5852	24.5756	24.7761	1.13e-05	5.17e-06	24.7969	24.4325	24.7961	24.6221	24.9962	24.6905	24.3289	25.176	0	24.825	24.5289	25.5927	24.7077	24.7573	25.0244	25.2547	24.4369	25.1556	25.1106	24.8387	24.5924	24.5389	24.4335	24.5972	24.5518	24.9603	24.8544	24.822	24.4733	24.7484	24.7797	24.6534
Glyma.13G181200.1	S16	1	Cold	StatsSet	24.1723	23.9527	24.1632	24.1189	24.3827	24.2115	24.2245	24.2755	24.1897	24.4188	24.1501	1.75e-05	7.66e-06	24.6141	24.5356	24.3363	23.2032	24.0457	24.0839	24.1107	23.5706	24.0514	24.2881	24.3303	23.9829	24.0495	24.3727	24.23	23.8234	24.6043	24.2043	24.332	24.3903	23.9494	24.2513	24.6246	24.0206	24.2246	24.5432	24.5054	23.6248	23.7993	24.6669	24.3604	0
Glyma.13G181200.1	S16	1	Control	StatsSet	24.3626	24.6402	24.7828	24.5478	24.6926	24.3471	24.4291	24.2531	24.3975	24.4777	24.5154	1.75e-05	7.66e-06	24.0234	24.5363	24.2848	24.6058	24.4135	24.597	24.7493	24.8012	24.2695	24.4687	25.2431	25.15	24.3022	24.6211	24.6969	24.5708	23.9868	25.2478	24.77	24.7656	23.8842	24.7854	24.2968	24.422	23.8076	24.529	24.8302	24.5496	23.8467	24.6239	24.4804	24.0613
Glyma.13G185300.1	S60	2	Cold	StatsSet	27.4511	27.3036	27.3665	27.3512	27.0088	27.3539	27.352	27.365	27.2523	26.5783	27.3382	6.87e-09	6.21e-09	27.7309	27.4439	27.5965	27.033	27.3662	27.4238	27.2873	27.1369	27.7557	27.1719	27.303	27.2353	27.3688	27.3993	27.5585	27.0781	0	26.8324	27.492	26.7021	27.5538	27.5044	27.4126	26.9449	27.5043	27.4159	27.3427	27.145	27.5349	27.2776	27.4012	27.2465
Glyma.13G185300.1	S60	2	Control	StatsSet	26.7846	26.9182	26.9691	26.4918	26.7234	26.7226	26.8615	26.7053	26.6955	26.7856	26.8508	6.87e-09	6.21e-09	26.7761	26.5413	27.2216	26.5995	27.0637	26.9379	26.8593	26.8119	0	26.5368	27.2483	27.1221	26.7412	26.1669	26.604	26.4549	26.856	26.7997	26.3995	26.8382	26.5783	26.8435	26.5292	26.9394	27.1038	26.6804	26.946	26.7157	26.8136	26.3625	27.1235	26.5215
Glyma.13G221300.1	S457	1	Cold	StatsSet	25.3617	25.3944	25.3588	24.8488	24.7603	24.416	24.5947	24.1428	24.0085	24.0018	25.1902	2.68e-08	2.08e-08	25.3342	25.0928	0	25.6581	25.2245	25.5843	25.6268	25.1419	24.4105	26.1785	25.4936	25.3524	24.4744	25.1155	24.9563	0	24.7645	25.0658	24.4506	0	24.0686	24.9971	24.1822	0	24.2787	24.7701	24.7353	0	23.8329	24.6714	24.3812	23.6855
Glyma.13G221300.1	S457	1	Control	StatsSet	25.6228	25.5488	25.7368	25.3211	25.2894	25.0066	25.4291	25.1428	24.9575	24.8228	25.8744	2.68e-08	2.08e-08	25.3541	26.4755	25.9919	24.67	24.7249	26.2081	26.3521	24.9102	25.739	26.1737	25.8223	25.2122	25.1901	25.3905	25.5138	25.1902	25.1054	26.4383	24.9935	24.6203	24.2929	25.6398	25.2614	24.8323	24.5492	25.7335	25.7787	25.6549	24.7473	25.4302	25.3548	25.0389
Glyma.13G242800.1	S582	1	Cold	UniqueSet	21.9015	21.3191	21.393	21.4558	21.2846	21.2122	21.3773	21.3187	21.4347	0	21.4853	NA	NA	21.6906	21.9479	22.0661	0	21.712	21.3097	20.9356	0	21.3898	21.0855	21.7039	0	21.6268	21.1244	21.6161	0	21.2561	20.8478	21.7499	0	21.6441	21.2882	20.7043	0	21.6791	20.8302	21.6225	0	21.7279	21.2279	21.0002	0
Glyma.13G242800.1	S582	1	Control	UniqueSet	22.9922	22.8152	23.0961	23.0052	22.6768	22.5836	22.5506	22.6213	22.6074	22.6434	22.5295	NA	NA	23.071	0	23.0194	22.886	22.838	0	22.477	23.1305	23.9231	22.3013	22.7879	23.372	23.1034	22.7602	22.8503	23.307	22.9901	22.3158	22.4608	22.9403	22.8623	22.0422	22.5674	22.8626	22.7805	22.7608	22.3807	22.2804	22.7913	22.3558	22.7855	22.5526
Glyma.13G242800.1	S802	1	Cold	StatsSet	23.6237	23.7166	23.8686	23.6594	23.5488	23.6424	23.803	23.656	23.8258	24.0147	23.6335	9.5e-10	1e-09	24.4202	23.2317	23.2191	0	24.4662	23.5726	23.1109	0	25.0223	23.6687	22.9148	0	24.7552	23.2928	22.9303	0	24.3123	23.1428	23.1912	0	24.5673	23.2488	23.111	0	24.3181	23.8761	23.2148	0	24.4542	23.623	22.8908	0
Glyma.13G242800.1	S802	1	Control	StatsSet	24.2022	24.1618	24.15	24.6357	24.8599	24.32	24.234	24.427	24.2898	24.5118	24.0642	9.5e-10	1e-09	24.8889	23.9602	23.7573	0	24.7002	24.2012	23.584	0	24.529	24.2493	23.6716	0	25.3374	24.2358	24.3337	0	24.8954	24.535	25.1492	0	24.5224	24.2763	24.1613	0	24.7705	24.2074	23.7241	0	24.811	24.3205	24.1494	0
Glyma.13G270900.1	S50	1	Cold	StatsSet	24.4011	24.37	24.2628	24.2482	24.2885	24.1937	24.366	24.192	24.3465	24.4623	24.4778	2.55e-06	1.33e-06	24.0705	24.6461	24.4866	0	24.2929	24.3831	24.434	0	24.0188	24.3684	24.4013	0	24.3238	24.082	24.3389	0	24.3853	24.3213	24.1589	0	24.2963	24.2116	24.0733	0	24.424	24.3822	24.2919	0	24.147	24.5227	23.9065	0
Glyma.13G270900.1	S50	1	Control	StatsSet	24.0617	23.9795	24.2508	23.9063	24.0218	24.0078	23.9585	23.5042	23.9736	23.9642	23.9759	2.55e-06	1.33e-06	24.1647	24.0277	23.9927	0	24.1564	24.2264	23.5558	0	24.1773	24.1127	24.4623	0	24.0226	23.9547	23.7417	0	24.1663	24.1413	23.7579	0	23.6667	24.4591	23.8975	0	23.926	24.2596	23.69	0	22.4502	23.9784	24.0841	0
Glyma.13G280700.1	S477	1	Cold	StatsSet	26.1293	26.0135	25.9944	26.1898	25.8646	25.7649	26.1378	25.9193	25.999	26.0379	26.0018	0.000569828	0.000192422	25.4584	26.1556	25.9726	26.9305	25.1236	25.5914	26.4738	26.865	25.1791	25.8199	25.9079	27.0709	25.7387	26.1161	26.1644	26.7398	25.4637	25.9126	26.2175	0	25.7354	25.8708	25.6884	0	26.1276	25.7652	26.5205	0	25.9131	25.7781	26.0667	0
Glyma.13G280700.1	S477	1	Control	StatsSet	25.5502	25.4658	25.4722	25.5554	25.1769	25.4814	24.1787	25.4864	24.1922	25.408	25.5259	0.000569828	0.000192422	25.5197	25.5335	25.8621	25.2854	24.9924	25.6278	25.7638	25.4794	25.5624	25.4186	25.6093	25.2985	25.324	25.3613	26.0293	25.5072	25.3043	25.112	24.7965	25.4948	25.0511	25.5441	25.4717	25.8589	25.4022	25.2625	25.8454	20.2045	25.5463	25.1174	25.7955	0
Glyma.13G302200.1	S363	1	Cold	StatsSet	22.5806	22.8227	24.3676	22.9861	23.4821	22.8544	24.0001	23.2494	23.2934	23.8847	21.7563	2.71e-17	1.41e-16	24.5208	22.825	20.3961	0	25.2024	0	20.2569	23.0087	25.5315	24.5152	0	23.0559	24.6397	24.4965	20.0427	22.7655	25.1551	24.5529	20.4985	23.7217	0	24.6888	19.8288	24.0455	24.4979	24.6723	0	22.8302	24.1443	24.6504	21.2456	22.9574
Glyma.13G302200.1	S363	1	Control	StatsSet	24.2875	24.3836	24.6197	24.7681	24.9845	24.7073	24.7494	24.6095	24.4786	24.6892	24.3798	2.71e-17	1.41e-16	25.4333	25.4792	21.8751	24.3625	25.3252	25.6481	22.2742	24.2867	25.4325	26.0177	22.01	25.0187	25.3764	26.1473	22.5904	24.9582	25.9514	25.4399	23.1674	25.3794	25.7644	25.5732	22.5897	24.9018	25.0842	25.6859	22.6887	25.5388	25.4683	26.282	21.8384	24.8492
Glyma.13G347700.1	S211	1	Cold	StatsSet	24.4149	24.3666	24.4608	24.6181	24.5832	24.4842	24.8078	24.5487	24.5662	24.7147	24.0236	0.166672	0.037397	24.2447	24.3537	24.6462	0	24.102	24.2596	24.7383	0	24.1905	24.2221	24.9699	0	24.2243	24.5576	25.0724	0	24.9637	24.1512	24.6347	0	24.9653	24.3041	24.183	0	25.3873	24.6023	24.4337	0	24.8656	24.7794	24.0012	0
Glyma.13G347700.1	S211	1	Control	StatsSet	24.0412	24.4617	24.6428	24.1946	23.9077	24.6358	24.7542	24.2906	24.6485	24.134	24.4316	0.166672	0.037397	24.0177	24.325	23.7809	0	24.3724	24.1654	24.8472	0	24.7309	24.2215	24.976	0	23.7884	24.4397	24.3559	0	23.6275	24.0509	24.0446	0	24.3755	24.7282	24.8036	0	24.2219	24.2367	25.804	0	24.3617	24.3066	24.2035	0
Glyma.13G350800.1	S286	1	Cold	StatsSet	26.7346	26.6117	27.3816	26.431	27.0432	26.7237	26.8773	26.5692	26.8754	26.7782	27.1153	0.000146994	5.42e-05	26.4465	26.7054	27.052	0	26.4258	26.3345	27.0748	0	26.8521	27.7576	27.5352	0	26.4077	26.0369	26.8484	0	26.6509	27.3563	27.1223	0	26.5923	26.5838	26.9949	0	26.6822	26.7851	27.1645	0	26.2679	26.5287	26.9109	0
Glyma.13G350800.1	S286	1	Control	StatsSet	26.4482	26.38	26.0635	26.3728	25.8541	26.3092	26.4982	26.4839	26.3742	26.7005	26.358	0.000146994	5.42e-05	26.6586	26.3659	26.3202	0	26.5207	26.4637	26.1555	0	26.1443	25.6877	26.3584	0	26.7836	26.18	26.155	0	27.0126	25.7312	24.8185	0	26.7924	25.8299	26.3054	0	26.9709	26.7132	25.8106	0	27.1898	25.9339	26.328	0
Glyma.13G356900.1	S178	1	Cold	StatsSet	25.2298	25.139	25.4014	25.3388	25.3119	25.083	25.1122	24.6918	24.5169	23.9779	24.9152	0.591209	0.119905	25.1217	25.2039	25.2702	25.3235	23.6576	25.1387	25.3113	26.4485	24.3978	25.3291	25.2746	26.6043	24.7315	25.2543	25.1406	26.229	24.4355	25.4867	25.9399	25.3856	24.1354	25.4765	25.288	25.4323	23.5494	0	25.5735	26.2137	21.0525	25.3099	26.2999	26.1048
Glyma.13G356900.1	S178	1	Control	StatsSet	24.8699	25.1618	25.244	24.9575	24.5937	25.1024	23.9047	24.82	24.8279	25.3805	25.1783	0.591209	0.119905	24.4145	25.4965	25.3618	24.2067	24.3811	25.2484	25.4429	25.575	25.2363	25.2787	25.5899	24.8711	25.307	25.3005	24.7336	24.4888	25.0341	24.9804	23.8356	24.5245	24.9329	25.3451	25.6379	24.4938	24.7757	25.3176	24.6581	20.8675	24.8249	25.2777	25.6638	23.5135
Glyma.13G360300.1	T443	2	Cold	StatsSet	24.5752	24.9658	25.3457	25.1151	24.783	25.0205	24.7582	25.121	25.0598	25.4211	24.7328	2.66e-08	2.08e-08	26.2788	24.5221	24.1452	23.3546	26.4626	24.7262	24.5009	24.1736	26.9757	25.0239	0	24.0376	26.2734	25.3789	24.236	24.5721	26.2642	24.859	24.0917	23.9169	25.8658	25.8688	24.2704	24.0769	25.2089	25.5494	24.1738	24.1008	24.9684	26.0247	24.3699	0
Glyma.13G360300.1	T443	2	Control	StatsSet	25.4652	25.4601	25.8051	25.6785	26.2344	25.4837	25.5947	25.732	25.6447	25.8818	25.4353	2.66e-08	2.08e-08	25.4951	26.0034	25.1925	25.1698	25.7966	25.7124	25.0157	25.3158	25.9043	26.4613	25.2298	25.6251	26.1587	25.8755	25.719	24.9608	26.2509	25.8554	27.1602	25.6713	25.7152	25.8469	25.3946	24.9779	25.9416	26.0093	24.8994	25.5284	25.7364	26.7735	25.44	24.9782
Glyma.13G360400.1	S13	1	Cold	StatsSet	22.3131	22.2547	22.6557	22.305	22.6724	22.4301	22.5066	22.251	22.2786	22.4771	22.4909	0.0186271	0.00517485	21.7295	22.2643	0	22.9455	22.3218	22.4602	21.9821	0	0	23.1042	22.0752	22.7877	21.7208	22.4208	21.9408	23.1375	22.5498	23.1301	22.3105	22.6993	21.4472	22.5142	22.7284	23.0305	22.4785	0	22.537	22.5042	22.2413	22.0975	22.4166	22.2484
Glyma.13G360400.1	S13	1	Control	StatsSet	22.8138	22.6541	22.8367	22.7105	22.7337	22.6104	22.8189	22.7111	22.5517	22.0164	23.2892	0.0186271	0.00517485	22.966	22.8918	22.6552	22.7423	0	22.6753	22.588	22.699	23.1775	22.6559	22.6768	0	22.6512	23.098	22.3821	0	23.084	23.2638	22.0585	22.5285	22.1691	23.2034	22.4588	0	22.5023	23.0313	22.8183	22.9237	22.9508	23.0784	22.0801	22.7352
Glyma.13G372100.1	S39	1	Cold	StatsSet	25.6422	25.3808	25.0383	25.7226	25.6273	25.5215	24.1273	24.9807	26.123	24.9094	25.2585	4.81e-06	2.41e-06	24.0961	25.8687	26.9619	0	23.8538	25.5989	26.6898	0	24.603	25.4506	25.0613	0	24.7025	25.9329	26.5325	0	23.8501	26.3416	26.6901	0	24.8945	25.6755	25.9946	0	24.0891	24.7109	23.5818	0	24.5625	23.5573	26.8224	0
Glyma.13G372100.1	S39	1	Control	StatsSet	24.2567	24.2209	22.9186	23.1641	23.4741	24.4716	23.6376	24.6483	24.9528	24.4888	24.2752	4.81e-06	2.41e-06	24.6563	23.7039	24.4097	0	23.305	25.0728	24.285	0	21.8405	23.6051	23.3102	0	23.1287	23.9537	22.41	0	24.2203	23.8358	22.3661	0	25.0976	24.5578	23.7594	0	24.098	23.9384	22.8763	0	24.7334	23.8658	25.3457	0
Glyma.14G001200.1	S809	2	Cold	StatsSet	24.5961	25.0903	24.9829	25.1507	24.6434	24.7815	24.7133	24.6853	24.3085	25.0592	24.8256	0.00640355	0.00191361	24.821	25.2324	25.3572	22.9738	24.4361	24.6302	25.7873	25.5075	24.3879	24.8465	25.3238	25.3735	24.5669	24.984	25.3118	25.7401	24.9738	25.0992	25.0355	23.4652	24.3978	24.6583	25.2884	0	24.3481	24.732	24.733	25.0401	24.2114	24.9976	24.8468	0
Glyma.14G001200.1	S809	2	Control	StatsSet	24.1108	24.4052	24.039	24.2971	24.378	24.6624	24.3808	24.5653	25.1841	24.5615	24.4646	0.00640355	0.00191361	24.2627	23.9377	24.3862	23.8567	24.5812	24.0355	25.3258	23.6782	24.1056	23.828	25.0094	23.213	24.4251	24.3839	24.4409	23.9384	24.7737	24.3999	24.1694	24.1688	24.728	24.5821	25.0383	24.3011	24.9032	24.4302	25.6399	22.55	24.8027	24.7838	24.7524	23.9223
Glyma.14G001200.1	S813	2	Cold	StatsSet	24.5961	25.0903	24.9829	25.1507	24.6434	24.7815	24.7133	24.6853	24.3085	25.0592	24.8256	0.00670714	0.00198675	24.821	25.2324	25.3572	22.9738	24.4361	24.6302	25.7873	25.5075	24.3879	24.8465	25.3238	25.3735	24.5669	24.984	25.3118	25.7401	24.9738	25.0992	25.0355	23.4652	24.3978	24.6583	25.2884	0	24.3481	24.732	24.733	25.0401	24.2114	24.9976	24.8468	0
Glyma.14G001200.1	S813	2	Control	StatsSet	24.1108	24.4052	24.039	24.2971	24.378	24.6624	24.6922	24.5653	25.1841	24.5615	24.4646	0.00670714	0.00198675	24.2627	23.9377	24.3862	23.8567	24.5812	24.0355	25.3258	23.6782	24.1056	23.828	25.0094	23.213	24.4251	24.3839	24.4409	23.9384	24.7737	24.3999	24.1694	24.1688	24.728	24.5821	25.0383	24.3011	24.9032	24.4302	25.6399	23.7954	24.8027	24.7838	24.7524	23.9223
Glyma.14G029100.1	S123	1	Cold	StatsSet	24.7126	23.8648	24.5185	24.5308	24.7346	24.8373	24.358	24.4126	24.4368	24.2575	24.6125	0.0643677	0.015808	24.444	25.2919	24.402	0	23.5522	24.3605	23.6818	0	24.3673	24.5737	24.6145	0	24.6295	24.4158	24.5471	0	24.9164	24.353	24.9344	0	24.4185	24.9029	25.1903	0	24.2548	24.3217	24.4976	0	23.8873	24.2209	25.1296	0
Glyma.14G029100.1	S123	1	Control	StatsSet	24.7165	24.7327	24.5232	24.8433	24.2549	24.6672	24.5537	24.9679	24.78	25.0417	24.2871	0.0643677	0.015808	24.479	24.6192	25.0513	0	24.2647	24.7135	25.2199	0	24.2731	24.7657	24.5307	0	23.9959	25.0706	25.4633	0	23.8089	24.347	24.6087	0	24.5599	24.469	24.9727	0	24.3431	24.4203	24.8979	0	24.6934	24.6894	25.521	0
Glyma.14G029100.1	S127	1	Cold	StatsSet	25.0881	24.5286	24.9324	25.2967	25.1466	25.171	24.7601	24.9138	24.81	24.455	25.3363	0.728198	0.143382	25.3054	26.5825	24.7292	23.7354	23.3777	25.3684	24.7554	24.6127	24.452	25.2747	25.3275	24.6753	25.1181	25.6463	25.2096	25.2126	25.0413	25.1478	25.7499	24.6476	24.2577	25.3518	26.5276	24.5467	23.8093	24.9734	25.0567	25.2008	23.1262	24.7677	26.2102	25.551
Glyma.14G029100.1	S127	1	Control	StatsSet	25.338	25.1779	24.9242	24.8873	24.9411	24.672	25.0254	25.1467	24.9239	25.4609	24.416	0.728198	0.143382	25.2391	25.589	25.9384	24.5853	24.9593	25.6354	25.772	24.345	24.4977	25.498	25.3201	24.3809	25.2165	24.7454	25.3993	24.1879	25.009	25.253	25.5413	23.9611	24.7257	24.8567	25.4613	23.6444	25.3714	25.6861	24.8702	24.1739	25.1215	25.2246	26.0612	24.1795
Glyma.14G029100.1	S127	2	Cold	StatsSet	22.1422	22.1372	22.8909	22.5841	22.308	22.2991	22.111	22.1236	21.6959	21.7782	22.6971	5.72e-12	9.91e-12	21.6651	23.3849	21.8928	21.626	21.7909	22.4098	22.2109	0	0	23.199	22.9532	22.5205	22.3877	23.2369	22.0229	22.689	22.866	22.0817	22.3476	21.9366	21.8832	22.5998	23.0143	21.6993	21.6708	22.3084	22.0064	22.4585	20.517	22.068	23.4035	22.5059
Glyma.14G029100.1	S127	2	Control	StatsSet	23.8877	23.7005	23.5193	23.3837	23.9828	23.316	23.2912	23.245	23.248	23.8153	23.5409	5.72e-12	9.91e-12	23.4041	24.051	24.2082	0	22.2974	24.3045	24.4998	0	22.3786	24.1471	24.0321	0	23.0164	23.0244	24.1103	0	23.3024	24.0784	24.5676	0	22.775	23.4616	23.7112	0	23.4866	24.2268	23.6612	21.7902	23.1875	23.405	24.3918	21.9959
Glyma.14G029100.1	S153	1	Cold	StatsSet	24.6527	23.0729	24.1303	24.236	23.7238	24.0892	23.5232	23.6374	23.7874	23.4266	24.5924	3.94e-08	2.96e-08	24.9608	25.746	23.2513	0	22.5408	23.2268	23.451	0	24.4362	24.3429	23.6118	0	24.4357	24.8305	23.4416	0	24.2293	23.5306	23.4117	0	23.5819	24.3713	24.3142	0	23.3045	23.7729	23.4921	0	22.3204	23.7957	24.7961	0
Glyma.14G029100.1	S153	1	Control	StatsSet	25.3482	25.3669	24.9695	24.836	25.0469	24.5907	24.676	25.2322	24.6058	25.5317	24.1806	3.94e-08	2.96e-08	25.0801	25.3837	25.5807	0	25.5876	24.9784	25.5347	0	24.1779	25.3311	25.3995	0	24.7635	24.7979	24.9464	0	24.301	24.7919	26.0477	0	24.2436	24.2662	25.2622	0	24.6899	24.6666	24.6715	0	24.7464	25.2285	25.7216	0
Glyma.14G039900.1	T197	1	Cold	StatsSet	25.4793	25.3509	25.7725	25.6907	25.8276	26.0162	25.634	25.7692	25.8735	25.5338	25.366	0.797517	0.15389	25.9882	25.7962	25.274	24.859	26.059	25.4217	25.621	24.3021	26.6588	26.0893	25.564	24.778	26.1367	26.499	25.5167	24.6106	25.9621	26.3655	25.8071	25.1757	26.0367	26.7734	25.8324	25.4223	25.6471	26.5282	25.4799	24.8806	25.6769	26.9236	25.6906	24.7855
Glyma.14G039900.1	T197	1	Control	StatsSet	25.5654	25.4613	25.6855	25.7001	25.9703	25.5112	25.518	25.785	25.6683	25.9824	25.2162	0.797517	0.15389	25.7111	26.2662	25.0874	25.1967	25.4501	25.5669	25.4233	25.4048	25.8653	26.3133	24.9731	25.5903	25.7943	26.193	25.4601	25.3528	26.2973	25.5127	26.3142	25.7568	25.4321	25.4755	25.6447	25.4926	25.5502	25.7742	25.0729	25.6747	25.6591	26.5169	25.3067	25.657
Glyma.14G040700.1	S56	1	Cold	StatsSet	26.4898	26.6682	26.7499	26.8013	26.5901	26.6648	26.7654	26.6542	26.7233	26.7087	26.691	1.34e-08	1.12e-08	26.6096	26.3532	0	26.5067	26.7604	26.372	0	26.8721	26.8546	26.159	0	27.2361	26.9709	26.4411	0	26.992	26.4248	26.5026	0	26.8428	27.0617	26.1069	0	26.8259	26.4469	26.8779	0	26.9715	26.9856	26.5056	0	26.4712
Glyma.14G040700.1	S56	1	Control	StatsSet	26.2999	26.1075	26.5255	26.0187	26.0009	25.8428	25.9812	25.7227	25.8549	25.7148	26.581	1.34e-08	1.12e-08	26.289	26.1154	0	26.4952	26.1129	25.7363	0	26.4733	25.803	26.5136	0	27.26	26.4546	25.3899	0	26.2114	26.4397	25.6852	0	25.8777	26.2166	25.3071	0	26.0049	26.1884	25.617	0	26.1383	25.7027	26.1013	0	25.3641
Glyma.14G061100.1	S309	1	Cold	StatsSet	30.2538	30.6158	30.5139	30.7352	30.4571	30.8406	30.9192	30.9489	31.1118	31.3241	30.3283	0.629614	0.126178	29.0771	30.5812	31.103	0	29.8378	31.0458	30.9638	0	28.4763	31.387	31.6783	0	29.6245	31.2672	31.3138	0	29.663	31.8926	29.8156	0	29.7159	31.695	31.1108	0	29.5881	31.6513	31.5181	0	29.8463	31.0753	31.9251	0
Glyma.14G061100.1	S309	1	Control	StatsSet	30.5769	30.888	31.5432	30.6175	30.506	30.6026	31.2612	30.6229	30.9369	30.4978	30.9011	0.629614	0.126178	29.9804	30.6994	31.0508	0	29.8674	31.2282	31.5685	0	32.5199	31.1324	30.9773	0	29.7297	31.207	30.9158	0	30.2009	31.0485	30.2686	0	31.0502	29.7588	30.9987	0	31.2462	30.7171	31.8203	0	30.653	30.6416	30.5743	0
Glyma.14G078300.1	S3	1	Cold	StatsSet	25.4833	24.5158	25.1944	24.4536	24.7525	24.5963	24.4344	24.681	24.2024	24.6396	24.8888	0.640673	0.128015	26.2722	25.0549	25.1229	0	25.3791	24.6089	23.5592	0	26.2523	25.2047	24.126	0	25.0575	24.393	23.9103	0	25.2907	24.5745	24.3922	0	25.0717	24.4921	24.2251	0	24.1811	24.6621	24.4598	0	25.061	24.3382	24.6439	0
Glyma.14G078300.1	S3	1	Control	StatsSet	25.4068	24.8635	24.3696	24.6732	25.0681	24.6166	24.4022	24.9871	24.598	24.6923	24.9683	0.640673	0.128015	26.1897	25.1446	24.886	0	25.3057	24.1183	25.1666	0	25.0957	24.0243	23.9888	0	26.2883	23.3514	24.3799	0	26.1165	23.8554	25.2324	0	25.9508	23.5089	24.3901	0	25.5532	24.1605	23.493	0	26.3909	24.6777	23.8927	0
Glyma.14G095300.1	S76	1	Cold	StatsSet	25.4683	25.4067	25.2822	25.528	25.2053	25.5736	25.404	25.3128	24.3789	25.4642	25.386	0.108092	0.0253478	25.0074	26.0208	25.4446	25.4002	25.2401	25.1355	25.7434	25.5077	24.9916	25.3874	25.2021	25.5477	25.3007	25.6256	25.6099	25.5757	24.8471	25.5213	25.1734	25.2793	25.5826	25.5608	0	25.5774	25.897	25.3592	25.2578	25.1019	25.5428	25.5267	24.7961	25.3855
Glyma.14G095300.1	S76	1	Control	StatsSet	25.2366	24.9574	25.1796	24.8456	25.0166	25.29	25.2566	24.9966	25.0638	25.1091	25.074	0.108092	0.0253478	24.9789	25.0094	25.5654	25.3926	24.9986	24.9507	25.052	24.8282	25.2972	24.9217	25.6385	24.861	24.5095	25.1134	25.0355	24.7241	25.1586	25.021	24.584	25.3027	25.0406	25.364	25.2078	25.5476	25.2579	25.2534	25.6811	24.8341	24.9963	24.9665	25.1834	24.8403
Glyma.14G216900.1	S421	1	Cold	StatsSet	23.8922	23.9368	23.6632	24.0367	23.7588	23.6974	23.8758	23.9069	23.7955	23.953	23.696	1.11e-15	3.58e-15	23.0018	24.1841	24.1974	24.1856	22.835	23.7744	24.5279	24.61	21.8923	24.2645	24.1787	24.3172	22.868	24.1404	24.374	24.7643	22.6973	24.1879	24.3821	23.7681	22.8503	23.832	24.2568	23.8505	22.6275	24.245	24.2377	24.393	22.9648	24.3523	24.1334	24.1772
Glyma.14G216900.1	S421	1	Control	StatsSet	22.6752	22.992	23.0221	22.74	22.4496	23.0906	22.8147	22.7406	22.9398	23.1798	22.9695	1.11e-15	3.58e-15	21.1907	23.1975	23.2505	23.0621	22.5871	22.978	23.5299	22.8732	22.9522	23.1549	23.5392	22.442	22.463	22.9579	22.6384	22.9006	22.4617	22.9654	21.7611	22.61	22.6814	0	23.5329	23.0574	22.6186	23.096	23.1203	22.4238	21.8645	23.1942	23.2188	22.6847
Glyma.15G010400.1	S163	1	Cold	StatsSet	23.0541	23.3381	23.3014	23.2653	23.369	23.3805	23.5146	23.3322	23.3228	23.459	23.1616	1.37e-06	7.64e-07	23.9359	23.0092	22.7353	22.5359	24.0782	23.3664	0	22.5697	24.0699	23.0764	0	22.7578	23.9853	23.0914	0	22.7193	23.6974	22.9807	0	23.4289	24.1402	23.0969	0	22.9044	24.3187	23.545	0	22.6801	23.781	23.5048	0	22.7109
Glyma.15G010400.1	S163	1	Control	StatsSet	23.6404	23.7795	23.8021	24.0806	24.0857	23.7469	23.6897	23.8115	23.6624	23.5815	23.5892	1.37e-06	7.64e-07	23.9052	23.4724	23.1372	24.0469	23.966	23.6599	23.0184	24.4737	23.806	23.6757	23.0073	24.7195	24.0246	23.6953	23.9739	24.6284	23.8886	23.962	24.4575	24.0345	23.9731	23.4913	23.3397	24.1836	23.6378	24.0575	23.1209	23.9424	23.7724	23.8222	23.8093	23.8421
Glyma.15G013500.1	S12	1	Cold	StatsSet	23.8261	23.5044	23.9045	23.2756	23.8209	23.4123	23.4928	23.3105	23.1572	23.2096	23.4617	0.036046	0.00954678	0	23.1237	23.9459	24.4086	22.8574	23.5157	23.0028	24.6416	0	23.7329	23.6278	24.3529	22.3645	23.1231	23.3543	24.2606	23.3288	23.8955	23.9775	24.0819	22.1192	23.2953	23.7994	24.4354	22.8663	22.8458	24.0789	24.18	22.4126	22.8753	24.0037	23.9502
Glyma.15G013500.1	S12	1	Control	StatsSet	23.1647	22.5414	23.2243	23.0907	22.987	22.9462	23.5364	23.387	23.2389	23.3632	23.5446	0.036046	0.00954678	23.2899	23.3602	23.8196	22.189	21.1908	23.3875	23.3998	22.1877	0	23.3077	23.6793	22.6859	23.1096	23.2327	23.4553	22.5655	23.4876	23.7713	22.6864	22.0025	23.0239	23.2027	23.4567	22.1013	23.1806	23.1806	24.4998	23.2845	23.4392	23.2773	23.3787	23.4529
Glyma.15G023600.1	S245	1	Cold	StatsSet	25.7087	25.7115	26.0467	25.6289	25.9656	25.6393	25.6458	25.4996	25.5868	25.8401	25.7554	5.89e-05	2.37e-05	24.7278	25.8166	26.5816	0	25.0566	25.9261	26.1519	0	25.3322	26.2414	26.5665	0	25.1115	26.1285	25.6468	0	24.9178	26.3967	26.5823	0	24.7429	25.8845	26.2906	0	24.7076	26.165	26.0646	0	25.0213	25.712	25.7653	0
Glyma.15G023600.1	S245	1	Control	StatsSet	25.2506	25.1135	24.6327	24.8383	24.6947	25.1798	25.1588	25.1808	25.4767	25.5244	25.2844	5.89e-05	2.37e-05	25.3088	25.2234	25.2196	0	25.0441	25.0894	25.2069	0	24.1277	24.8191	24.9512	0	24.8482	25.203	24.4636	0	25.6918	24.539	23.8534	0	25.452	24.8882	25.1992	0	25.3117	25.2193	24.9454	0	25.844	24.9387	24.7597	0
Glyma.15G026000.1	S67	1	Cold	StatsSet	23.8917	23.5177	23.6395	23.5318	23.1614	23.3218	23.4064	23.1922	23.5524	22.6429	23.6219	1.14e-08	9.76e-09	24.3569	24.1504	23.1678	0	23.2408	23.3713	23.9411	0	23.9946	23.3609	23.5631	0	23.4361	23.3627	23.7967	0	23.2977	23.6012	22.5853	0	23.7587	23.5152	22.6916	0	23.7198	23.0618	23.4375	0	23.2368	23.6568	22.6831	0
Glyma.15G026000.1	S67	1	Control	StatsSet	24.1519	24.0594	24.2891	24.0893	23.9455	24.093	24.3866	23.8946	23.8483	24.0022	23.9093	1.14e-08	9.76e-09	23.6965	24.2485	24.5106	0	24.3658	24.0672	23.7453	0	24.284	23.9967	24.5865	0	24.3311	24.0307	23.9062	0	23.8147	23.878	24.1437	0	23.9068	24.0506	24.3216	0	24.3586	24.495	24.3063	0	23.7735	24.1151	23.7952	0
Glyma.15G042000.1	S571	1	Cold	StatsSet	21.9413	21.9322	21.9338	21.9415	21.7632	21.8937	21.7864	21.7602	21.9373	21.2811	22.137	1.67e-06	8.93e-07	22.1369	22.1842	21.9328	21.5113	21.7887	22.3155	21.6924	0	22.0177	21.7406	21.7947	22.1822	21.9896	21.5022	22.1099	22.1645	22.4966	21.2105	21.6731	21.6727	22.301	21.5213	22.4078	21.3445	21.6028	0	21.7519	22.0047	21.4158	21.3872	22.0113	22.2263
Glyma.15G042000.1	S571	1	Control	StatsSet	21.4889	21.6308	21.5321	21.4534	21.6263	21.1565	21.1277	21.0366	21.3331	21.2594	21.3719	1.67e-06	8.93e-07	21.9172	21.0042	21.3516	21.6827	21.7013	21.2967	21.8134	21.7118	21.3352	20.9204	21.7509	22.1218	21.723	20.8221	0	21.8152	21.8424	21.8151	21.5021	21.3457	21.4714	21.2643	20.6854	21.2051	21.6913	21.2316	20.7784	20.8094	21.5097	20.8023	21.3538	20.4805
Glyma.15G052400.1	T210	1	Cold	StatsSet	24.6793	24.6719	24.9474	24.8809	24.9888	24.8779	24.9969	24.9565	24.9482	25.0492	24.9308	9.19e-14	2.39e-13	24.2062	25.0049	24.9745	24.5318	24.0275	24.5607	24.4394	25.6601	24.4652	24.9268	24.5807	25.8167	24.4219	24.8816	24.991	25.229	24.1609	24.986	25.6285	25.1796	23.9067	25.0621	25.3945	25.1481	23.4944	24.934	25.697	25.8621	23.7888	24.9588	25.413	25.6653
Glyma.15G052400.1	T210	1	Control	StatsSet	23.2595	23.9484	23.8966	23.618	23.2812	24.0526	23.5769	23.4972	23.7434	23.7805	23.7513	9.19e-14	2.39e-13	21.3073	24.0992	23.8148	23.8167	23.8283	23.4903	23.9187	24.5565	0	23.8427	23.4626	24.3845	22.8938	23.8425	22.8707	24.8649	23.8715	23.3358	22.687	23.2305	25.0423	23.6419	23.8492	23.6771	24.1164	23.5146	23.3456	23.3309	22.1996	23.7609	24.2072	23.8213
Glyma.15G074900.1	S59	1	Cold	StatsSet	27.0447	26.9471	26.3887	27.0203	27.2394	27.1893	27.3527	27.2966	26.9966	27.4763	27.2383	6.4e-08	4.6e-08	26.4903	27.4774	27.1663	0	26.2211	27.0768	27.5435	0	23.6018	27.4437	28.1207	0	26.5677	27.0137	27.4795	0	26.5438	27.2773	27.897	0	26.5763	27.2881	27.7034	0	26.5684	27.5372	27.9524	0	26.6644	27.6519	27.5735	0
Glyma.15G074900.1	S59	1	Control	StatsSet	25.391	26.174	26.4138	25.1305	25.4407	26.5504	25.8386	26.1353	26.4758	26.6195	26.0691	6.4e-08	4.6e-08	23.7909	26.1469	26.2351	0	26.1705	25.9173	26.434	0	26.7496	26.0271	26.4648	0	23.1542	26.185	26.0524	0	25.4928	25.8057	25.0237	0	26.543	26.3629	26.7455	0	25.4438	25.9229	26.1491	0	25.6862	26.073	26.6465	0
Glyma.15G100200.1	S150	1	Cold	StatsSet	27.8351	27.4224	27.9876	27.5719	27.4544	27.2431	25.8121	27.3594	27.1865	27.3734	27.7253	0.0152461	0.00427251	26.9429	28.3729	27.5949	28.4298	26.007	27.9258	27.1298	28.627	0	28.0446	27.5437	28.3744	26.0003	28.1055	27.3297	28.8522	25.8842	27.9236	27.7345	28.2754	25.2528	28.3329	27.1131	28.2734	25.9025	27.0076	27.5604	22.7777	25.8117	27.6177	27.4123	28.5958
Glyma.15G100200.1	S150	1	Control	StatsSet	27.1649	27.2006	25.8384	25.7044	26.6709	26.8692	27.1165	27.3309	25.8404	27.4989	25.9778	0.0152461	0.00427251	26.18	27.8746	27.6523	26.9527	26.464	27.3176	27.8204	0	0	27.5646	27.3935	22.5571	26.3694	27.8314	26.8685	21.7483	26.558	27.1517	26.3029	0	26.181	27.2132	27.1782	26.9044	26.4535	27.4789	27.1291	27.4045	26.8064	27.7751	27.2766	27.4657
Glyma.15G111600.1	S330	1	Cold	StatsSet	20.1609	20.345	20.2235	20.1973	20.021	20.4261	20.4105	20.5395	20.6575	20.5677	20.2535	0.00681572	0.00200135	21.16	19.8431	20.0498	19.5909	21.7452	20.4055	19.5462	19.6831	22.1258	19.6792	19.3565	19.7326	21.8734	19.7925	19.299	19.8241	21.4516	19.6248	19.3044	19.7033	21.9338	20.0216	19.5664	20.1824	21.8492	20.15	19.8322	19.8104	22.4631	20.0518	19.6544	19.9886
Glyma.15G111600.1	S330	1	Control	StatsSet	20.3059	20.7158	20.6873	20.7497	21.0159	21.1797	20.5147	20.7101	20.576	20.79	20.8274	0.00681572	0.00200135	21.0059	19.3721	19.7948	21.0507	21.4613	20.3616	19.7238	21.3165	20.0836	20.5513	0	21.4271	21.4247	20.4719	20.3524	0	21.3155	20.7935	21.085	20.8697	21.8193	20.6725	0	21.0472	20.7718	20.0601	0	20.7124	21.1952	20.0071	0	20.9281
Glyma.15G120300.1	S1363	1	Cold	StatsSet	25.6066	25.1559	25.4927	25.2721	25.6355	25.6913	25.4607	25.3482	25.4606	25.4575	25.3285	0.00791916	0.00227589	25.8495	25.6527	25.3177	0	25.9707	24.9622	24.5349	0	25.9427	25.2868	25.2487	0	26.076	25.2506	24.4897	0	26.6933	24.8171	25.396	0	25.9269	25.4968	25.6502	0	25.4371	25.456	25.489	0	25.47	25.3102	25.2644	0
Glyma.15G120300.1	S1363	1	Control	StatsSet	25.7999	25.7802	25.588	25.6634	25.6913	25.6963	25.5274	25.7835	25.5204	25.7171	25.6555	0.00791916	0.00227589	26.0804	25.7108	25.6086	0	26.1398	25.801	25.3999	0	25.1875	25.6479	25.9286	0	25.9034	25.5413	25.5454	0	26.0683	25.751	25.2546	0	26.0804	25.6824	25.3262	0	25.5995	25.5061	25.4766	0	26.0663	25.6833	25.6009	0
Glyma.15G120300.1	S1647	1	Cold	StatsSet	25.3188	24.609	25.0423	24.596	25.2214	25.0731	24.9388	24.8273	24.7827	24.9216	24.9344	0.000479689	0.000166137	24.9572	25.1574	25.8419	0	25.3616	24.5614	23.9041	0	25.2184	24.8855	25.0231	0	24.7302	24.5813	24.4763	0	25.8651	24.8276	24.9715	0	24.5495	24.8679	25.802	0	24.7425	24.7224	25.3515	0	24.8034	24.3069	25.3715	0
Glyma.15G120300.1	S1647	1	Control	StatsSet	25.294	25.3991	25.084	25.4423	25.3351	25.1063	25.1179	25.2275	25.0023	25.2729	25.6035	0.000479689	0.000166137	25.5306	25.0906	25.2607	0	25.411	25.229	25.5573	0	24.9187	24.9548	25.3786	0	25.3273	25.711	25.2885	0	25.5435	25.4499	25.012	0	25.2268	25.1915	24.9006	0	25.0965	24.7548	25.5024	0	25.6661	24.9889	25.0275	0
Glyma.15G129300.1	S507	1	Cold	StatsSet	27.7686	27.7782	27.7283	27.6506	27.7774	28.0189	28.0235	28.0646	27.6551	28.2029	27.5809	6.12e-12	1.03e-11	27.064	28.136	27.9238	27.9506	26.2667	27.8491	28.2387	28.7585	26.1236	28.2698	28.2729	28.2466	26.509	27.9124	27.5904	28.5909	27.0499	28.2176	28.2534	27.5888	26.8811	28.5972	28.3433	28.2539	26.7143	28.127	28.6337	28.619	27.1878	28.2118	28.9134	27.9455
Glyma.15G129300.1	S507	1	Control	StatsSet	25.9983	27.2705	26.7975	27.2924	25.6902	27.0744	26.6565	26.5518	26.9529	27.1303	26.7343	6.12e-12	1.03e-11	24.0632	0	27.6038	26.3278	26.8268	26.9906	27.599	27.6656	25.9883	26.7961	26.867	27.5385	27.2604	27.734	26.1665	28.0089	25.5375	0	25.1944	26.3387	27.1116	27.2117	27.2782	26.6964	26.5451	26.9511	26.9218	26.2081	24.6945	27.0845	27.3168	27.1113
Glyma.15G143800.1	S45	1	Cold	StatsSet	25.8103	25.5206	25.7726	25.8017	25.9523	25.665	25.8106	25.7358	25.8266	25.6092	25.7952	1.53e-17	1.03e-16	25.3286	25.7432	25.6619	26.5076	24.4768	25.2712	25.6014	26.7332	25.2029	25.3332	26.0527	26.5018	25.3327	25.4112	25.5759	26.8872	25.1962	26.084	26.4351	26.0937	24.7039	25.3381	26.2872	26.3307	24.9552	25.6046	26.2104	26.472	25.1536	25.4407	25.8004	26.5485
Glyma.15G143800.1	S45	1	Control	StatsSet	25.1265	24.9897	24.8251	24.4292	24.2307	25.0333	24.7389	24.7823	24.8962	25.1273	24.8416	1.53e-17	1.03e-16	24.4935	25.255	25.4602	25.2973	24.8898	24.8249	25.2862	24.9579	24.1086	25.0182	25.3129	24.8609	24.2553	23.9029	24.8489	24.7096	24.3815	23.7425	23.9552	24.8436	24.8743	24.618	25.1573	25.4835	24.6413	24.8642	24.7036	24.7465	24.5392	24.6832	25.0292	24.8775
Glyma.15G163700.1	S788	1	Cold	StatsSet	26.4055	26.1865	26.4448	26.2902	26.3643	26.2314	24.9912	26.1762	26.22	26.4389	26.0997	0.499033	0.102441	26.515	26.4263	26.0921	26.5884	26.0537	25.7994	26.4586	26.4344	26.6819	26.0807	26.295	26.7215	26.1956	25.8199	26.8943	26.2512	26.044	26.5152	26.1751	26.7228	26.3043	25.7578	26.3299	26.5335	21.4018	26.1208	26.3216	26.1206	26.3636	25.9074	26.453	25.9805
Glyma.15G163700.1	S788	1	Control	StatsSet	26.4411	26.2136	26.1659	26.231	26.0205	26.4242	26.4186	26.2301	26.1131	26.3067	26.2303	0.499033	0.102441	26.5831	26.1139	26.3593	26.7084	26.3212	26.2936	26.008	26.2315	25.9153	26.0995	26.1804	26.4685	26.2398	26.0507	26.2385	26.3952	26.3262	25.6787	25.3406	26.7363	26.2384	26.4276	26.1595	26.8715	26.4696	26.1238	26.2797	26.8015	26.3942	26.0269	26.236	26.2632
Glyma.15G163700.1	S807	1	Cold	StatsSet	25.3284	25.1218	25.0795	25.1191	25.4	25.0892	25.2019	25.1021	25.3067	25.1444	24.9772	3.1e-13	7.47e-13	25.6068	25.3878	25.4676	24.8514	26.0127	25.0388	24.574	24.8615	25.8973	24.8058	25.1518	24.4631	25.7023	24.7879	25.348	24.6381	26.3134	24.7765	25.5405	24.9694	25.6143	24.8266	25.027	24.8889	25.886	25.0612	24.9506	24.9098	25.9809	24.9752	24.7157	24.7364
Glyma.15G163700.1	S807	1	Control	StatsSet	25.7699	25.8793	25.8335	26.2255	25.9124	26.0091	25.6031	25.81	25.7868	25.7548	25.8278	3.1e-13	7.47e-13	26.1286	25.3946	25.4181	26.1384	26.0686	25.3401	25.6561	26.4526	25.9662	25.4766	25.2162	26.675	26.3308	25.9483	25.904	26.7189	25.8813	25.7375	26.0972	25.9337	26.6692	25.7684	25.3401	26.2588	25.6792	25.122	25.6763	25.9347	25.8992	25.7382	25.7072	25.8954
Glyma.15G167500.1	S26	1	Cold	StatsSet	25.0044	25.1469	24.8674	25.2316	24.9728	25.0613	24.9736	25.0495	24.96	25.0253	24.6823	1.32e-10	1.59e-10	24.6596	25.0426	25.038	25.2776	24.2749	24.8942	25.8186	25.6001	23.3277	25.3151	25.247	25.5798	24.6368	25.2669	25.5128	25.5099	24.5782	25.112	25.0189	25.182	24.5469	25.343	24.7537	25.6017	24.3174	25.3209	24.8958	25.3604	24.8727	25.0708	24.8488	25.4059
Glyma.15G167500.1	S26	1	Control	StatsSet	24.1756	24.4728	24.4882	23.9132	23.8521	24.4143	24.3244	24.1064	24.1047	24.4058	24.434	1.32e-10	1.59e-10	22.9044	24.5338	25.3851	23.879	24.144	24.7317	25.0446	23.9709	24.1104	24.7586	25.2116	23.8722	22.9151	24.5998	24.411	23.7267	22.7643	24.6196	24.2349	23.7899	23.3322	25.1557	24.662	24.5073	23.4503	24.8406	25.0965	23.9104	22.9149	24.4277	25.0586	24.0242
Glyma.15G196800.1	S849	1	Cold	StatsSet	26.545	26.3143	26.6393	26.5385	26.4949	26.4163	26.3509	26.3534	26.2908	25.8251	26.3799	1.51e-07	1.03e-07	26.2985	26.9205	26.7173	26.2436	25.8197	26.7661	26.3353	26.336	26.2586	26.9467	26.5665	26.7852	25.9008	26.5118	26.9863	26.755	26.2932	26.3732	26.9006	26.4127	25.7415	26.44	26.9368	26.5468	25.8509	26.1811	26.8217	26.5497	25.5754	26.5752	26.7801	26.4827
Glyma.15G196800.1	S849	1	Control	StatsSet	25.9496	25.968	26.1176	25.88	25.8532	25.7839	25.9242	25.7975	25.8841	25.991	25.8447	1.51e-07	1.03e-07	25.659	26.204	25.9077	26.0275	25.7614	25.7516	26.18	26.1789	25.6669	25.9602	26.4871	26.3561	26.0864	25.732	25.7379	25.9636	25.7641	26.1914	25.5917	25.8654	25.3232	26.238	25.7534	25.8209	25.9415	25.8332	26.2732	25.6489	25.6691	25.9519	26.1021	25.4669
Glyma.15G212800.1	S91	1	Cold	StatsSet	22.3192	22.4327	22.5889	22.3637	22.4006	22.4929	22.3057	22.4168	22.4558	22.5838	22.2155	5.33e-12	9.48e-12	23.0452	0	22.2515	21.6608	23.0256	22.2286	0	22.0441	23.6417	22.7189	22.0787	21.9163	23.2325	22.1651	21.889	22.1682	23.1793	0	22.0367	21.9858	23.4477	22.3985	22.219	21.9066	22.4892	22.5188	22.1878	22.0269	23.3389	22.4361	22.1286	21.7635
Glyma.15G212800.1	S91	1	Control	StatsSet	22.9722	22.9721	23.0023	23.3279	23.2659	23.069	22.8531	22.9305	22.8556	23.1258	23.0316	5.33e-12	9.48e-12	23.4598	22.9298	22.5054	22.9939	23.3762	22.909	22.631	0	0	23.0993	22.6997	23.2078	23.4556	23.2144	22.8483	23.7933	23.2124	23.3899	23.1795	23.2816	23.085	23.1971	22.7773	23.2167	22.9431	22.7857	22.5287	23.1549	23.327	22.7585	22.5035	23.133
Glyma.15G227600.1	T46	1	Cold	StatsSet	24.0507	23.8654	23.9098	23.8623	23.7744	24.0722	23.9615	24.0429	24.0983	24.1499	24.0074	0.900917	0.17214	23.8596	24.025	24.2675	0	23.843	23.6278	24.1255	0	24.0348	23.6717	24.0228	0	23.6983	23.7819	24.1065	0	23.6712	23.7173	23.9346	0	24.1298	23.858	24.2289	0	24.2037	23.9047	23.7761	0	23.8086	24.2276	24.0926	0
Glyma.15G227600.1	T46	1	Control	StatsSet	23.8385	24.0263	24.0811	23.9537	23.9307	23.8023	24.1581	23.8934	24.1444	23.9563	23.9347	0.900917	0.17214	24.2799	23.6369	23.5988	0	24.1831	23.7606	24.1351	0	24.3059	23.7789	24.1586	0	24.1235	23.9043	23.8332	0	24.0933	24.0427	23.6561	0	23.7388	24.1287	23.5394	0	24.2638	23.974	24.2365	0	24.1707	23.9496	23.5597	0
Glyma.15G253700.1	T95	1	Cold	StatsSet	25.0891	24.8896	23.5787	24.8065	25.3003	24.6535	24.7974	24.061	24.3872	24.4772	24.0455	7.29e-06	3.57e-06	25.1207	0	25.519	24.6278	25.2875	0	24.2333	25.1479	25.4827	19.9451	0	25.3081	25.0688	24.5856	0	24.7651	25.6431	24.6555	25.4339	25.4688	24.9723	24.7818	0	24.2065	24.8946	24.65	24.9117	24.7333	0	24.3027	23.9928	23.8876
Glyma.15G253700.1	T95	1	Control	StatsSet	25.7173	25.5761	25.7753	25.5704	25.3861	24.9805	25.3558	25.5529	25.3098	25.4369	25.8035	7.29e-06	3.57e-06	26.0008	25.6226	25.494	25.7519	25.4525	25.4309	25.6772	25.744	25.5345	25.3134	25.9762	26.2773	26.276	25.4695	25.2083	25.328	25.4413	25.4137	25.2479	25.4414	25.0666	25.3408	24.3451	25.1694	25.9336	25.3842	24.9067	25.1987	25.9185	25.3489	25.656	25.2881
Glyma.15G254100.1	S269	1	Cold	StatsSet	25.8035	25.7411	26.0518	25.788	25.7338	25.9455	25.4087	25.9164	25.6104	26.2217	25.609	0.000682213	0.000226968	25.6264	25.8442	25.7046	26.0387	25.6587	26.0951	26.044	25.1667	26.2094	26.4015	25.6455	25.9509	25.3473	26.6784	25.7849	25.3414	25.3683	26.0915	25.8468	25.6285	25.4697	26.8478	25.5682	25.8965	24.9667	25.7879	25.7183	25.162	25.0878	27.1381	25.5235	0
Glyma.15G254100.1	S269	1	Control	StatsSet	25.3029	25.2271	25.4836	25.451	25.4319	25.5949	25.4959	25.7502	25.6248	25.9291	25.062	0.000682213	0.000226968	25.8714	26.4576	24.65	24.2327	25.2564	25.7384	25.0508	24.863	25.9514	26.1917	24.7679	25.0235	25.6743	26.1993	25.03	24.9004	25.9058	25.657	24.6449	25.52	25.3825	26.0222	25.6651	25.31	25.4038	25.8234	25.0859	25.6706	25.4765	26.3616	25.195	25.9675
Glyma.15G255400.1	S98	1	Cold	StatsSet	25.1291	24.574	24.5281	24.2594	24.7193	24.5121	25.1218	24.4281	24.9594	24.9577	24.6833	0.0181394	0.00506229	24.1359	25.0212	26.2303	0	24.0867	24.9805	24.6548	0	24.3006	24.4688	24.8149	0	24.0458	24.9762	23.7564	0	23.7082	24.6608	25.7888	0	23.9077	25.0264	24.6022	0	24.6756	25.2584	25.4314	0	24.0743	25.1051	24.1048	0
Glyma.15G255400.1	S98	1	Control	StatsSet	24.6698	24.4249	24.0426	24.3708	23.9749	24.4527	24.3177	24.6287	24.9647	24.2204	24.6713	0.0181394	0.00506229	24.4834	24.6408	24.8852	0	23.9995	24.4046	24.8705	0	22.7058	24.3745	25.0474	0	23.9643	24.774	24.3742	0	24.1804	24.1877	23.5567	0	23.9015	24.809	24.6475	0	23.6875	24.8741	24.3914	0	24.6191	24.6276	24.6395	0
Glyma.16G003900.1	S318	1	Cold	StatsSet	24.8634	25.0615	24.778	25.089	24.5649	24.883	24.9742	25.1006	25.1321	23.5324	25.0449	0.00724925	0.00210125	21.993	25.162	25.8974	26.4012	22.6928	26.0035	25.2995	26.2503	21.8596	25.0184	26.0547	26.1792	22.6774	25.3768	25.8623	26.4394	22.3878	25.538	24.5515	25.7825	22.4939	25.2284	25.5588	26.251	22.7368	25.2193	25.9084	26.0322	23.5633	24.8912	25.7193	26.2285
Glyma.16G003900.1	S318	1	Control	StatsSet	23.7897	23.7763	24.1084	23.878	23.9861	23.3856	25.2012	24.4103	24.9551	24.5692	24.1135	0.00724925	0.00210125	22.4793	25.0597	25.3354	22.2843	22.4537	24.8101	25.8433	21.9979	23.35	25.6194	25.6486	21.8157	22.6555	25.3465	25.3714	22.1385	22.7446	25.3001	25.107	22.7927	20.9511	23.9613	25.5083	23.1217	24.2208	24.5249	26.4652	25.5938	23.4932	24.2998	25.0875	24.7606
Glyma.16G011100.1	S15	1	Cold	StatsSet	25.7015	25.4673	25.548	25.7946	25.8463	25.2511	25.8029	25.351	25.6792	25.9651	25.6211	5.97e-10	6.5e-10	24.4138	26.3907	26.2999	0	23.9678	25.9239	26.5102	0	24.3972	25.9594	26.2874	0	24.9417	26.3279	26.1143	0	24.9175	26.3627	26.2586	0	23.4355	26.2423	26.0756	0	24.6467	26.2078	26.5541	0	23.6944	26.2449	26.1138	0
Glyma.16G011100.1	S15	1	Control	StatsSet	23.6887	24.5277	24.4728	24.2694	23.0889	25.0983	24.6665	24.7332	25.0566	25.0036	23.8835	5.97e-10	6.5e-10	21.7785	24.7466	24.5408	0	24.2481	24.3993	24.9357	0	24.3171	24.5489	24.5523	0	23.3669	25.1323	24.309	0	21.7621	24.2807	23.2238	0	24.9701	25.0664	25.2585	0	23.7448	25.4608	24.7938	0	24.2937	24.8804	25.0256	0
Glyma.16G033100.1	S703	1	Cold	StatsSet	24.841	24.8541	24.8419	24.6353	25.1104	24.9268	24.8846	24.6641	25.0174	23.5647	24.9573	0.329404	0.0697395	24.701	25.0847	24.7374	0	25.1092	24.8267	24.6264	0	24.9735	24.772	24.7803	0	24.8657	24.6721	24.3682	0	25.6907	24.7115	24.9291	0	25.0817	24.8724	25.2083	24.545	24.8864	24.942	24.8255	0	24.7662	24.83	24.3961	0
Glyma.16G033100.1	S703	1	Control	StatsSet	24.6651	24.9197	25.2345	24.8323	24.9901	24.7451	24.6127	24.6062	24.6359	24.9596	24.8468	0.329404	0.0697395	24.2037	24.8004	24.6394	25.017	24.5267	24.8594	25.0426	25.2501	0	24.9384	25.2503	25.5148	24.8542	24.6185	24.7938	25.0626	24.4635	25.3358	25.2725	24.8884	24.6639	24.797	24.5023	25.0173	24.4367	24.6633	24.7937	24.557	24.1584	24.9228	24.931	24.4126
Glyma.16G042600.1	S383	1	Cold	StatsSet	25.6533	25.3528	25.4705	25.6411	25.729	25.6184	25.4436	25.3184	25.7438	24.9902	25.6372	4.11e-06	2.12e-06	25.5082	25.8695	26.0613	25.1744	25.5275	25.317	25.3475	25.2192	25.434	25.4417	25.7091	25.2973	25.4384	25.5841	26.0108	25.5309	25.565	25.5804	25.9856	25.785	25.3416	25.6601	26.0707	25.4012	25.2809	25.6267	25.6764	25.1906	25.1392	25.781	25.5663	24.7873
Glyma.16G042600.1	S383	1	Control	StatsSet	25.6168	25.5324	25.5154	25.225	25.2176	24.9501	24.977	24.7365	24.898	24.7248	25.4551	4.11e-06	2.12e-06	25.6329	25.6456	25.6376	25.5513	25.465	25.5252	25.5455	25.594	25.2889	25.4675	26.0548	25.2504	25.4451	25.1822	25.0089	25.2639	25.0857	25.4227	25.0197	25.3424	24.8971	25.267	24.7038	24.9325	24.8834	24.9871	25.0597	24.9779	24.629	25.0099	24.7752	24.5318
Glyma.16G051600.1	S560	1	Cold	StatsSet	22.4694	22.7114	22.6365	22.6092	22.5596	22.5786	22.695	22.6739	22.9999	22.8057	22.5654	2.16e-08	1.71e-08	23.2725	22.1468	0	21.9888	23.8451	22.7538	22.094	22.1529	23.8232	22.4604	22.492	21.7704	23.5083	22.4991	22.0262	22.403	23.2321	22.5436	21.678	22.7849	23.7292	22.4489	21.8715	22.265	23.8729	22.6078	21.8533	22.4461	23.7582	22.6873	21.9813	22.2688
Glyma.16G051600.1	S560	1	Control	StatsSet	23.1363	23.2677	23.3514	23.4486	23.5989	23.1863	23.1677	23.1098	22.8667	23.0462	23.1611	2.16e-08	1.71e-08	23.4713	22.8207	22.6652	23.588	23.6811	22.8673	22.5855	23.9369	23.4236	23.2068	22.4673	24.3078	24.0883	22.9053	22.7128	24.088	23.4975	23.5838	23.7826	23.5318	23.4328	23.1303	22.5875	23.5944	23.5896	23.4352	22.4122	23.2337	23.4523	23.1803	22.4157	23.391
Glyma.16G053500.1	S367	1	Cold	StatsSet	24.255	24.3552	24.1242	22.6742	23.6734	23.449	22.8185	23.1332	23.331	22.8982	24.7231	0.00340257	0.00103513	24.1682	24.2128	24.3302	24.3089	24.4346	24.8092	24.1446	24.0324	24.4325	24.1448	24.0416	23.8779	23.6192	23.8792	23.8161	19.3821	23.8384	23.6424	0	23.5396	23.5015	23.2179	23.362	23.7147	22.8673	22.2018	0	23.3864	22.9819	23.4826	23.0716	22.9967
Glyma.16G053500.1	S367	1	Control	StatsSet	24.3835	23.9137	23.858	24.218	24.0305	23.7842	23.9765	24.0033	23.8657	23.8267	24.0083	0.00340257	0.00103513	24.4536	24.1996	24.9166	23.9641	24.3121	23.5293	23.4137	24.3999	0	23.4695	23.6312	24.4732	24.618	23.9066	23.8584	24.4888	24.3821	23.7248	23.8081	24.2069	23.8101	23.2893	23.6769	24.3605	24.6238	23.7756	23.8089	23.6977	24.2814	23.8926	23.8048	24.0345
Glyma.16G070900.1	S3	1	Cold	StatsSet	25.4006	26.0203	26.0145	26.2195	26.1234	26.0116	26.3107	24.3766	26.1969	25.3233	26.228	0.172916	0.0386694	25.321	24.8376	25.7059	25.7379	26.0276	26.1863	25.8909	25.9767	25.3357	25.9613	26.2186	26.5423	25.5405	25.9322	27.0316	26.3736	25.7972	26.9527	25.6065	26.1372	25.5716	25.9367	26.6595	25.8785	25.7822	26.5491	26.6009	0	25.8279	25.9359	26.7775	18.9652
Glyma.16G070900.1	S3	1	Control	StatsSet	25.412	25.3956	25.9539	24.9507	25.8979	24.9976	26.3219	25.2343	25.3395	25.3839	25.9596	0.172916	0.0386694	24.6401	26.0499	25.8447	25.1132	25.1402	26.1672	25.2113	25.0639	25.6519	26.6131	26.253	25.2976	25.3208	25.2069	24.9027	24.3724	25.7039	26.9067	25.7438	25.2372	25.7162	24.8208	25.0074	24.4461	26.3088	26.1286	26.7094	26.1408	25.1894	25.7923	25.0584	24.8972
Glyma.16G096600.1	S143	1	Cold	StatsSet	24.0643	24.2074	24.398	24.2207	24.4273	24.5523	24.1798	24.3696	24.2298	23.7892	24.2973	0.363148	0.0752325	24.405	23.983	24.0559	23.8133	24.5979	24.1882	23.8361	0	25.3998	24.618	24.0027	23.5714	24.7161	24.7862	23.8611	23.5194	24.5292	24.5272	24.2254	0	24.3156	25.0033	24.307	24.5834	24.0339	24.627	24.2678	23.7905	24.0767	25.0918	24.2814	24.0287
Glyma.16G096600.1	S143	1	Control	StatsSet	24.1908	24.0425	24.3559	24.2427	24.3946	24.2968	24.2714	24.5479	24.3809	24.7539	23.9122	0.363148	0.0752325	24.0233	25.15	24.0174	23.5727	24.1376	24.2507	23.8483	23.9335	24.4083	25.055	23.8727	24.0876	24.6296	24.3237	24.0004	24.0172	24.8936	24.0643	24.362	24.2585	24.2953	24.3847	24.2903	24.2168	24.3227	24.3596	23.9722	24.4313	24.4532	25.0724	23.9981	24.6681
Glyma.16G113000.1	S109	1	Cold	StatsSet	26.584	26.7444	26.6404	26.6512	26.4954	26.1215	26.7693	26.6115	26.8803	26.9385	26.471	1.46e-25	3.28e-24	25.7291	25.8289	27.095	27.6829	25.99	26.34	27.6157	27.0317	26.0484	26.4441	27.0149	27.0543	25.8054	26.4255	27.1211	27.2528	25.933	26.8329	26.9895	26.2263	26.3233	26.542	25.1597	26.4611	27.3278	27.301	26.5551	25.8934	26.9219	26.7829	26.1414	26.5996
Glyma.16G113000.1	S109	1	Control	StatsSet	23.4792	23.6882	23.1921	23.7428	23.7783	24.9954	24.3639	23.2115	24.3447	23.4792	23.9674	1.46e-25	3.28e-24	23.1908	23.2818	23.773	23.6713	23.0823	24.0241	23.9759	23.6704	24.9635	23.814	24.2393	19.7515	23.4791	23.7001	24.0491	0	23.6607	23.7824	23.2746	24.3953	23.7165	25.464	25.279	25.5222	24.6066	24.7843	24.2991	23.7657	23.345	22.4045	23.7994	23.2973
Glyma.16G165800.1	T41	1	Cold	StatsSet	24.8531	24.8631	24.8669	24.1682	24.4697	23.8255	24.3773	23.6789	23.5003	23.7497	25.3399	1.56e-06	8.47e-07	25.3241	24.4726	25.0626	24.553	25.6374	24.7161	24.3142	24.7847	25.6268	24.5588	24.9231	24.3587	25.0414	24.0131	23.681	23.9372	25.6847	23.7531	24.0237	24.4171	24.6042	23.7979	23.4703	23.4295	25.0673	23.9092	24.5881	23.9446	24.572	23.2457	23.2191	0
Glyma.16G165800.1	T41	1	Control	StatsSet	25.0293	25.069	24.8419	25.4092	25.0248	24.8493	25.095	24.834	24.8038	24.3514	25.2227	1.56e-06	8.47e-07	25.4727	24.701	24.5892	25.3541	25.7545	24.6268	24.5289	25.3659	25.0061	24.5155	23.9417	25.9041	24.8895	24.9978	25.4052	26.3444	24.6865	24.4229	25.7656	25.2241	25.2218	24.7818	24.5442	0	24.7282	0	24.8995	25.6574	24.8295	24.2214	25.1038	25.1813
Glyma.16G173500.1	S15	1	Cold	StatsSet	28.2054	27.8375	27.9204	28.0299	28.4478	28.1716	28.335	28.3589	28.3532	28.0849	28.1175	9.65e-11	1.19e-10	27.0551	28.538	28.8695	28.3591	26.3145	28.1139	28.119	28.8024	26.3451	28.6437	28.1778	28.515	26.9579	28.5871	28.1044	28.4703	27.7434	28.7103	28.8398	28.4977	26.6144	28.7783	28.5937	28.7	26.5774	28.6406	29.078	29.0442	27.0562	28.3195	29.4765	28.5834
Glyma.16G173500.1	S15	1	Control	StatsSet	27.1778	27.1966	27.3992	27.4287	26.5843	27.3889	27.0339	27.2647	27.3979	27.5652	27.2384	9.65e-11	1.19e-10	26.1707	27.5451	27.9539	27.0415	26.826	27.2316	27.5342	27.1948	26.7339	27.0374	27.7539	28.0718	27.1408	27.92	27.4269	27.2273	26.4827	26.9333	26.0995	26.8217	27.2322	27.5465	27.7935	26.9834	26.4569	27.19	27.9989	26.4898	27.2677	26.8476	27.9077	27.036
Glyma.16G173500.1	S26	1	Cold	StatsSet	27.9096	27.5588	26.2478	26.1304	27.5655	27.7149	27.9176	27.6448	27.8689	27.6952	27.8188	0.361262	0.0750722	27.7661	28.21	27.013	28.6492	27.1421	27.5036	27.0326	28.5568	21.9057	28.1684	26.4678	28.4494	27.7719	28.4627	26.2147	22.0724	26.9514	28.2282	26.9235	28.159	27.6785	28.2016	26.3598	28.6197	27.91	27.8092	27.3356	28.6154	27.6251	27.7726	26.7567	28.4247
Glyma.16G173500.1	S26	1	Control	StatsSet	27.53	27.3156	27.3261	27.1832	26.8369	27.4404	27.5871	27.6175	27.2607	26.0856	27.3999	0.361262	0.0750722	27.9579	27.2185	27.0201	27.9235	27.57	27.7093	26.7686	27.2145	27.4528	27.3662	26.6734	27.8118	27.2208	27.7757	26.2043	27.5319	27.8305	26.8723	25.0361	27.6089	27.7387	27.6499	26.6125	27.7604	28.0304	27.3293	27.1598	27.8289	28.2474	27.2312	26.9704	28.0212
Glyma.16G173500.1	S52	1	Cold	StatsSet	26.4955	26.2369	26.5193	26.7979	26.7091	26.5993	26.4152	26.3189	26.4286	26.6827	26.4858	9.65e-07	5.47e-07	27.4487	26.1988	26.5257	25.8088	27.1449	26.011	26.3873	25.4045	27.4491	26.5778	26.1337	25.9166	27.3932	26.7441	26.2563	0	27.08	26.4964	26.5509	0	26.7916	26.569	26.6579	26.3785	26.7153	26.8729	26.5619	25.5109	27.075	26.399	26.2225	25.5793
Glyma.16G173500.1	S52	1	Control	StatsSet	27.2135	27.0272	26.924	26.9913	27.0854	27.0382	26.9473	26.9786	26.8103	27.0271	27.1271	9.65e-07	5.47e-07	27.4149	27.3456	26.9497	27.1437	27.2524	27.219	26.4381	27.1995	26.3731	26.9371	26.6458	27.7401	26.8056	27.2482	26.88	27.0315	26.9414	26.9672	27.0896	27.3434	27.4221	27.1307	26.4107	27.1891	27.072	26.6465	26.5913	27.4792	27.125	27.091	26.4257	27.2725
Glyma.16G209400.1	S696	1	Cold	StatsSet	27.9002	27.6683	27.7293	27.8141	27.7318	27.7386	27.9597	27.9398	27.9808	28.0034	27.6499	0.0200667	0.0055316	27.6329	28.2986	27.7691	0	26.8442	28.1083	28.0525	0	27.1979	28.1068	27.8832	0	27.2246	28.1044	28.1133	0	27.4445	27.9731	27.7778	0	27.266	28.2361	27.7136	0	27.9523	28.0651	27.8617	0	27.6208	28.3816	27.817	0
Glyma.16G209400.1	S696	1	Control	StatsSet	27.5484	27.6609	28.0283	27.6859	27.2922	27.6134	27.6926	27.5352	27.5104	27.6738	27.8747	0.0200667	0.0055316	26.9759	27.7053	27.964	0	27.1683	27.8668	27.9477	0	27.7751	27.7785	28.5315	0	26.9138	28.2843	27.8596	0	26.2997	27.8107	27.766	0	26.7967	28.2502	27.7932	0	26.7159	27.8433	28.5186	0	27.0009	27.6551	27.9497	0
Glyma.16G220500.1	S14	1	Cold	StatsSet	25.8468	25.6063	25.5872	25.5023	25.6348	25.3897	25.5002	25.4719	25.6455	25.8756	25.3443	5.34e-07	3.25e-07	25.344	26.2705	25.9258	0	24.3465	25.9459	26.5266	0	24.8803	25.9809	25.9003	0	24.8097	25.9177	25.7794	0	24.3456	26.0618	26.4971	0	24.4244	26.0483	25.6965	0	24.6951	25.8056	26	0	24.7806	25.9163	25.7188	0
Glyma.16G220500.1	S14	1	Control	StatsSet	25.1667	25.4004	24.9031	24.7542	24.83	25.1201	24.9108	25.2095	25.3968	25.2918	24.9856	5.34e-07	3.25e-07	23.9315	25.7067	25.8618	0	24.4406	25.3385	26.4221	0	23.7336	25.2871	25.6887	0	23.7778	25.2464	25.2385	0	24.5659	25.2049	24.7191	0	24.0006	25.3943	25.9653	0	24.2139	25.4668	25.0516	0	24.3193	25.3686	25.9407	0
Glyma.17G032400.1	S672	1	Cold	StatsSet	23.6284	23.6551	23.9016	23.5699	23.6648	23.6073	23.6731	23.6618	23.3737	23.1182	23.8486	0.341216	0.0713456	24.2223	23.2021	23.4607	0	23.9697	23.5419	23.4538	0	24.3357	23.8629	23.5064	0	23.722	23.5095	23.4781	0	23.9176	23.5266	23.5501	0	23.824	23.6606	23.3372	0	23.9212	23.5353	23.5627	0	23.3779	23.9064	23.701	0
Glyma.17G032400.1	S672	1	Control	StatsSet	23.7525	23.8139	23.9079	23.6907	24.0636	23.4888	23.6861	23.5924	23.2956	23.7271	23.6974	0.341216	0.0713456	23.5649	24.0331	23.6595	0	23.8562	23.9861	23.5994	0	23.6886	24.1081	23.9269	0	23.6648	23.9834	23.4238	0	23.663	24.6932	23.8345	0	23.184	24.0355	23.2469	0	23.3574	24.0032	23.6977	0	23.2267	23.7886	23.762	0
Glyma.17G044000.1	S1482	1	Cold	StatsSet	26.9356	26.9157	27.0158	27.0941	27.0745	27.1793	27.542	27.393	27.1825	26.1377	27.0763	1.59e-05	7.06e-06	26.4414	27.2387	27.1631	26.899	25.1553	27.2644	27.6413	27.6018	24.7484	27.9478	27.8188	27.5482	26.1271	27.2964	27.3069	27.6458	26.379	27.5354	27.741	26.6425	26.0829	27.291	28.2717	27.0714	26.4255	27.5339	28.4868	27.7221	26.0649	27.6623	28.3072	27.5375
Glyma.17G044000.1	S1482	1	Control	StatsSet	26.3413	26.4263	26.7478	26.2919	25.7843	26.288	26.2681	26.4249	26.6498	26.5017	26.3606	1.59e-05	7.06e-06	26.3881	26.1172	26.8059	26.0539	25.931	26.316	27.1748	26.2833	0	26.5617	26.6518	27.0298	26.1282	26.5843	26.2412	26.214	25.7405	25.8642	25.5601	25.9721	25.8782	26.1535	26.7782	26.342	26.416	25.9333	26.5742	26.149	26.5331	26.1485	26.7975	26.2205
Glyma.17G044000.1	S1482	2	Cold	StatsSet	27.529	27.2518	27.001	27.2625	26.8936	27.0088	27.2693	27.483	27.1251	27.2892	27.1728	3.29e-10	3.77e-10	0	27.8716	27.3212	27.3944	25.4678	27.8393	27.9346	27.7652	24.8809	27.8979	27.4176	27.8074	25.9728	27.277	27.6031	28.1973	26.2832	27.8239	27.1342	26.333	25.676	27.4074	27.7214	27.2304	26.1009	27.5823	27.8889	27.5052	26.317	27.6239	28.3665	27.6245
Glyma.17G044000.1	S1482	2	Control	StatsSet	25.8064	26.3946	25.9072	26.0426	25.9681	26.8644	26.6141	26.7344	26.9537	26.9919	25.8698	3.29e-10	3.77e-10	25.1737	26.0811	26.3761	25.5948	25.6174	26.3675	26.9055	26.688	25.9866	25.9246	26.2656	25.452	25.3821	26.5682	26.7242	25.4958	0	26.1384	25.8283	25.9377	26.2422	26.9565	27.4526	26.8061	26.0364	27.1515	27.1478	26.1206	0	26.1833	27.4917	26.5282
Glyma.17G092400.1	S15	1	Cold	StatsSet	24.9684	25.0045	24.7589	24.6975	24.3657	24.4162	24.7242	24.5854	24.6388	24.7373	25.09	3.41e-11	4.61e-11	25.9665	24.6592	24.6008	24.6471	25.5303	25.2417	24.8546	24.3912	25.5353	24.5408	24.6979	24.2618	25.191	25.0142	24.3003	24.2843	25.4696	24.3106	23.8814	23.8012	25.6042	24.564	23.6008	23.8957	25.4706	24.7762	23.9258	0	24.8094	25.3928	23.5539	0
Glyma.17G092400.1	S15	1	Control	StatsSet	25.7542	25.6882	25.4508	25.7702	25.9678	25.5933	25.4546	25.1509	25.6792	25.2134	25.3505	3.41e-11	4.61e-11	25.8249	25.6037	25.8409	25.7472	26.3296	25.4357	24.6532	26.3345	25.7666	25.2073	24.7447	26.0846	26.1434	25.3136	25.2507	26.3731	25.7654	25.5499	26.3584	26.1975	25.2171	25.1372	25.5072	26.5116	25.9162	26.1175	24.437	25.3475	25.264	25.0294	25.1888	25.1212
Glyma.17G096100.1	S5	1	Cold	StatsSet	25.8046	25.8112	25.452	25.6945	25.9757	25.6731	26.4454	25.926	25.8145	26.1196	25.5757	0.00013129	4.9e-05	25.8908	24.4204	27.1027	0	26.2332	25.4719	25.7284	0	25.4079	25.0157	25.9324	0	25.9876	25.045	26.0507	0	26.0598	25.9836	25.8836	0	26.52	25.1406	25.3586	0	27.1307	25.3064	26.8991	0	26.8412	25.6146	25.3223	0
Glyma.17G096100.1	S5	1	Control	StatsSet	25.0051	24.3607	25.0538	25.4419	23.2805	26.0851	25.5312	25.0799	25.399	24.3729	25.7126	0.00013129	4.9e-05	25.2907	24.7025	25.0222	0	24.6391	24.7359	23.707	0	25.5435	24.1745	25.4435	0	23.9636	26.3943	25.9679	0	24.6309	22.7927	22.418	0	25.7393	26.6507	25.8653	0	24.3988	25.1197	27.0752	0	25.2569	25.1462	24.8368	0
Glyma.17G096100.1	T889	1	Cold	StatsSet	26.1333	25.3241	25.3724	25.6746	26.058	26.0672	26.1867	25.7617	26.1577	26.3658	25.6088	0.156937	0.0354483	25.9926	26.0068	26.2194	26.3141	25.3762	24.9031	0	25.693	25.8939	24.8266	24.8924	25.8768	25.6426	25.0191	0	26.3621	26.5299	24.9416	25.5207	27.2399	25.7273	25.6629	25.7913	27.0874	26.5309	26.0136	26.0408	26.1616	26.2029	25.5838	25.3966	25.8635
Glyma.17G096100.1	T889	1	Control	StatsSet	26.4335	26.3426	26.588	26.4867	24.5461	26.4166	26.6403	26.5239	26.7926	26.5174	25.429	0.156937	0.0354483	26.8484	26.0267	25.9465	26.9124	26.4216	25.8901	25.9617	27.0971	26.3248	26.022	26.7067	27.2984	26.3483	26.9657	26.1459	0	26.3772	26.3264	26.0863	19.3945	26.3527	26.4827	25.7571	27.074	26.3336	25.8308	26.9245	27.4726	26.8756	26.3009	25.9953	26.9238
Glyma.17G096100.1	T954	1	Cold	StatsSet	28.3814	28.1346	28.3178	28.5815	28.5568	28.5437	28.7052	28.6316	28.7192	28.5792	26.2066	0.000139409	5.17e-05	27.2647	29.0181	28.3973	28.8456	26.9862	28.2643	28.3553	28.9325	27.069	28.5224	28.5638	29.1161	27.6232	28.698	28.5203	29.4844	27.5564	28.6834	29.0657	28.9218	27.3053	28.7014	28.7643	29.4037	28.0173	28.3468	28.9779	29.4787	28.1822	28.0121	29.084	29.2481
Glyma.17G096100.1	T954	1	Control	StatsSet	27.2227	27.6104	27.6084	27.264	26.7254	27.9123	27.4795	27.6571	28.0165	27.785	27.2404	0.000139409	5.17e-05	26.2808	27.5648	28.0705	26.9748	27.0736	27.4067	28.2841	27.6774	27.5237	27.4731	28.5577	26.8791	26.707	28.0093	27.8716	26.4681	26.1194	26.9683	26.8874	26.9267	27.7289	27.8715	28.3017	27.7472	26.7667	27.1412	28.4355	27.5747	0	27.1434	28.1019	27.7259
Glyma.17G098200.1	S410	1	Cold	StatsSet	24.5852	24.3707	24.5	24.4524	24.4445	24.1718	24.3546	24.117	24.2097	24.4397	24.3362	8.67e-05	3.33e-05	23.9307	24.6405	25.1845	0	23.7699	24.6591	24.6832	0	23.948	24.417	25.135	0	23.8699	24.4322	25.0549	0	23.999	24.3909	24.9436	0	23.5299	24.3707	24.6147	0	23.9152	24.2859	24.8628	0	23.4158	24.5537	24.3814	0
Glyma.17G098200.1	S410	1	Control	StatsSet	23.9144	24.0064	23.9671	23.9292	23.7398	23.9362	24.4492	23.9749	24.3027	24.2277	24.1929	8.67e-05	3.33e-05	23.6935	24.0248	24.0248	0	23.7158	23.826	24.4775	0	23.5045	23.8248	24.5719	0	23.8373	23.7812	24.1692	0	23.7322	24.1227	23.3646	0	23.5093	23.9737	24.3256	0	24.1103	24.0888	25.1486	0	23.9991	23.7541	24.1715	0
Glyma.17G103100.1	S2	1	Cold	StatsSet	24.7132	25.1858	25.2866	24.7863	25.3699	25.0234	25.2717	25.4159	24.8867	25.3779	24.6392	0.00453652	0.00137391	25.7379	24.0579	24.3439	0	28.375	24.1709	23.0115	0	26.9128	25.0484	23.8985	0	26.7042	24.5546	23.0999	0	27.721	24.6854	23.7035	0	27.0214	24.4414	23.6075	0	27.2672	24.2646	24.2834	0	27.3357	24.9186	23.9936	0
Glyma.17G103100.1	S2	1	Control	StatsSet	25.1764	24.6668	25.5991	25.7999	26.4156	26.1841	25.5623	25.685	25.8492	25.8776	25.2934	0.00453652	0.00137391	27.3994	25.2338	22.896	0	25.677	25.8649	22.4585	0	27.6159	26.0382	23.1432	0	27.6162	25.4231	24.3605	0	27.9656	25.5993	25.6818	0	28.1721	26.3862	23.9939	0	26.951	25.7874	23.9484	0	27.6892	25.6488	23.7169	0
Glyma.17G111200.1	S595	1	Cold	StatsSet	21.9489	23.0554	22.5941	23.3007	22.5582	22.6804	22.6015	22.1735	22.0731	22.9951	21.9915	3.08e-08	2.37e-08	23.9072	20.7239	20.477	22.6873	23.4871	22.9591	23.4663	22.3089	24.2924	20.8576	0	22.6322	23.7497	23.2327	0	22.9198	23.7604	23.3878	0	20.5263	23.8864	23.5185	0	20.6362	23.4774	24.0623	0	20.2648	23.8317	23.7886	20.901	20.1725
Glyma.17G111200.1	S595	1	Control	StatsSet	24.0641	23.8856	23.9159	23.7052	23.9765	23.8841	23.6707	23.9511	23.7741	24.0069	23.8829	3.08e-08	2.37e-08	24.0714	24.3705	23.6448	24.1696	23.9541	23.978	23.5799	24.0304	23.9512	24.3071	23.4919	23.9132	23.4818	0	23.8231	23.8108	23.7977	23.7558	24.1508	24.2017	23.4767	24.079	23.8701	24.1107	23.4845	23.7377	23.3122	24.1485	23.8627	23.9832	23.8352	24.1232
Glyma.17G129700.1	S214	1	Cold	StatsSet	25.6055	25.4567	25.5247	25.6637	25.6304	25.2471	25.7197	25.4482	26.0549	25.5494	25.5197	1.44e-10	1.7e-10	25.0018	26.0003	25.9423	25.4777	23.8569	25.3726	26.2538	26.3435	23.7231	26.2825	26.2668	25.8265	24.8145	26.3087	25.868	0	25.3277	25.4492	26.2128	25.5321	24.7396	25.5426	25.4592	0	24.2689	25.3187	26.9965	26.2946	24.5478	24.9647	26.185	26.0952
Glyma.17G129700.1	S214	1	Control	StatsSet	24.1541	24.2065	23.942	24.1793	24.0506	24.9847	24.6129	24.5927	25.2544	24.9119	24.2911	1.44e-10	1.7e-10	0	24.4205	24.6529	23.3888	24.1337	23.796	24.936	23.9605	22.3401	24.5421	24.6479	24.2378	24.0268	24.3651	24.1456	24.1796	24.3671	24.6849	23.4997	23.6505	25.2539	24.7568	25.1632	24.7648	24.293	24.7846	24.9716	24.4025	24.9576	24.2602	0	24.5603
Glyma.17G140600.1	S32	1	Cold	StatsSet	25.7093	26.0973	26.3419	25.9858	25.9824	26.5989	26.153	26.3175	26.2171	26.4179	25.9864	1.01e-05	4.7e-06	23.0876	21.4682	28.5588	29.7227	23.1573	21.0381	29.7869	30.4069	23.8418	21.5539	29.994	29.9781	23.2805	21.8356	28.4662	30.3608	22.9743	21.308	29.829	29.8185	23.1801	22.1005	30.1951	30.92	22.5625	22.0389	29.6401	30.3704	22.1936	22.3773	30.2796	30.4196
Glyma.17G140600.1	S32	1	Control	StatsSet	25.0801	25.4802	24.4575	25.4013	25.198	25.4899	25.5037	27.0831	25.5319	25.9756	24.8302	1.01e-05	4.7e-06	21.395	22.4287	29.0153	27.4815	22.0456	22.0243	29.4365	28.4144	21.6896	22.6918	28.9911	0	22.3207	21.5738	29.21	28.5005	22.2935	22.2192	27.7656	28.5136	21.5683	21.5698	29.6301	29.1916	21.9808	21.8195	29.473	28.7415	0	22.8647	29.2148	29.1696
Glyma.17G140600.1	S6	1	Cold	StatsSet	31.0151	31.165	31.1569	30.5218	30.7745	30.5409	30.0186	29.9969	29.8978	29.9438	31.3506	0.0143924	0.00405007	30.2976	32.0714	29.6847	32.0066	29.7284	31.4442	31.192	32.2952	29.2166	31.9718	31.5969	31.8423	29.9449	31.3024	29.213	31.627	29.6972	31.3778	30.8399	31.1832	29.2782	30.9846	31.0385	30.8622	29.5756	29.6579	29.3967	31.444	29.4412	28.8734	30.8399	30.8331
Glyma.17G140600.1	S6	1	Control	StatsSet	30.8106	30.7075	30.5626	30.4621	29.4096	30.1861	30.0117	29.9442	30.1406	29.7439	30.7183	0.0143924	0.00405007	29.848	31.3676	31.5841	30.4427	30.2968	30.5945	31.4264	30.5122	30.401	30.4492	30.4696	30.9306	29.7799	31.0361	30.6718	30.3608	29.2784	29.0517	29.3408	29.9676	30.135	29.9586	30.7483	29.9026	29.666	29.7185	30.6833	29.979	29.0639	30.1376	30.2451	30.3302
Glyma.17G165200.1	S40	1	Cold	StatsSet	26.4013	27.1209	27.4697	27.2125	27.2562	26.7455	27.0634	26.7478	26.8512	27.2728	26.9061	0.20276	0.0443164	24.5884	26.7049	27.9107	0	25.9799	27.3819	28.0008	0	25.7242	27.1865	29.4983	0	26.0306	27.8572	27.7498	0	26.1996	26.6937	28.8753	0	25.5736	27.2693	27.3935	0	25.5014	27.4611	28.2278	0	26.2046	26.9437	27.0951	0
Glyma.17G165200.1	S40	1	Control	StatsSet	27.1157	27.3749	27.4648	27.1467	26.5759	26.8263	27.0126	27.4624	27.4258	27.5657	27.3872	0.20276	0.0443164	26.474	27.6299	27.2432	0	26.2335	27.4101	28.4812	0	26.4788	27.4667	28.449	0	26.736	27.5058	27.1984	0	25.759	27.3888	26.5799	0	26.6833	26.9878	26.8079	0	26.2678	26.769	28.001	0	27.0128	27.446	27.9285	0
Glyma.17G175000.1	S1566	1	Cold	StatsSet	25.5282	25.3966	25.8149	25.426	25.7912	25.5114	25.6135	25.7052	25.5148	25.9992	25.3963	0.267412	0.0577001	25.0102	25.7489	25.8256	0	24.8633	25.4383	25.8881	0	24.672	26.3942	26.3786	0	24.7841	25.7852	25.7085	0	25.1936	26.0859	26.0941	0	24.5325	26.1155	25.8862	0	24.7467	26.0628	26.0311	0	24.9399	26.3966	25.779	0
Glyma.17G175000.1	S1566	1	Control	StatsSet	25.2121	25.4171	25.7945	25.6466	24.8227	25.531	25.6672	25.4294	25.667	25.8115	25.4441	0.267412	0.0577001	24.3819	25.7117	25.5428	0	25.1894	25.441	25.6207	0	26.2622	25.438	25.6832	0	25.2441	26.144	25.5516	0	25.0383	25.4704	23.9595	0	25.2626	25.4949	25.8356	0	25.2936	25.5264	26.1815	0	24.956	25.81	25.5221	0
Glyma.17G199200.1	T883	1	Cold	StatsSet	24.9594	23.6851	22.8926	24.7552	24.6406	24.7475	25.365	25.0091	24.8835	24.2254	24.5104	0.099157	0.0234973	24.911	25.8841	24.0831	0	23.7017	24.0372	23.3165	0	23.9764	24.7111	19.9902	0	24.5436	24.932	24.7899	0	24.4359	24.7974	24.6885	0	24.3814	25.2654	24.5956	0	26.0321	25.6959	24.3671	0	25.6305	24.7109	24.686	0
Glyma.17G199200.1	T883	1	Control	StatsSet	24.9237	24.6423	24.7847	24.9116	24.5272	24.7889	24.6023	25.2109	24.7861	25.1056	24.625	0.099157	0.0234973	24.6731	25.875	24.2231	0	24.9546	25.6715	23.3007	0	25.347	25.7658	23.2413	0	25.0283	26.5559	23.1506	0	24.7667	25.1001	23.7147	0	25.3764	26.1058	22.8847	0	24.7746	25.4502	23.5821	0	25.1021	25.8383	24.6925	0
Glyma.17G199200.1	T950	1	Cold	StatsSet	28.7592	27.8615	28.3069	28.7105	28.4811	28.9251	28.8354	28.8755	28.91	28.9948	28.3608	0.95227	0.179145	28.3219	29.0766	28.9868	28.6517	27.5816	27.5239	27.7771	28.5636	28.1519	28.2744	27.9135	28.8878	28.6237	28.3559	28.8032	29.0592	28.0773	28.2099	28.6409	28.9963	28.5131	28.6631	29.0306	29.4937	28.9064	28.5587	28.8161	29.0604	28.4978	28.3998	28.9497	29.6548
Glyma.17G199200.1	T950	1	Control	StatsSet	28.681	28.3688	28.471	28.6471	28.219	28.8707	28.629	28.8113	28.8413	29.1054	28.432	0.95227	0.179145	28.6341	28.5785	29.0876	28.4239	27.6724	28.8618	28.7753	28.1657	28.2566	28.5524	28.9369	28.1379	27.9311	29.4811	28.9348	28.2412	28.0476	28.1853	28.227	28.4159	28.4808	29.3089	28.7018	28.9914	28.0273	28.8029	29.1944	28.4915	28.9198	28.5934	28.961	28.7712
Glyma.17G230300.1	S111	1	Cold	StatsSet	26.991	26.861	26.3907	26.8904	27.0587	26.8631	27.006	26.7714	26.8474	27.2026	26.8769	0.0595136	0.014777	26.511	27.6561	26.8057	0	25.6853	27.1145	27.7833	0	24.4375	27.4383	27.2962	0	26.0379	27.2703	27.3629	0	26.0632	27.5083	27.6045	0	25.8477	27.3939	27.3476	0	26.3144	27.6142	27.0895	0	25.843	27.4995	26.9718	0
Glyma.17G230300.1	S111	1	Control	StatsSet	26.7193	26.7419	27.0051	26.6693	26.1943	26.5681	26.6658	26.7217	26.7307	26.7709	26.6601	0.0595136	0.014777	26.006	27.0743	27.0777	0	26.0929	26.6998	27.4331	0	27.0715	26.8924	27.0513	0	26.2743	27.126	26.6075	0	26.211	26.5759	25.7961	0	25.9321	26.7458	27.0262	0	26.2108	26.8562	26.9303	0	26.2966	27.0659	26.8026	0
Glyma.17G249900.1	S36	1	Cold	StatsSet	25.9931	26.6203	26.5176	26.2793	26.6141	26.3995	25.8731	25.9878	26.1278	26.2659	26.4582	0.000624959	0.000209989	25.8117	26.8097	25.3579	0	25.4918	26.8997	27.4694	0	24.7856	27.4783	27.289	0	25.4928	26.9004	26.4448	0	25.8617	27.1566	26.8239	0	25.4885	27.0007	26.7092	0	25.2585	26.7718	25.589	0	24.7131	26.5944	26.656	0
Glyma.17G249900.1	S36	1	Control	StatsSet	25.3797	25.5099	25.9717	25.5577	25.3784	25.9546	26.2259	25.7604	26.349	26.5083	25.3182	0.000624959	0.000209989	24.1035	25.9364	26.0993	0	25.22	25.476	25.8337	0	26.2473	25.8453	25.8226	0	25.2817	25.721	25.6705	0	25.5314	25.7504	24.8534	0	25.6978	25.6989	26.4671	0	26.022	26.187	26.4688	0	25.0722	26.0007	26.2083	0
Glyma.17G249900.1	S504	1	Cold	StatsSet	27.3122	27.3929	27.2856	26.9735	27.0024	26.5584	26.7526	26.557	26.6216	26.7145	27.5467	0.308227	0.0658755	27.2834	27.3815	27.2718	0	26.7473	27.5554	27.876	0	26.6291	27.7606	27.4672	0	26.3991	27.5009	27.0207	0	26.2454	27.5127	27.249	0	26.1993	27.0944	26.3814	0	26.7269	26.2405	27.2905	0	25.9993	27.0577	26.6142	0
Glyma.17G249900.1	S504	1	Control	StatsSet	27.1759	26.8401	27.1993	26.7767	26.1639	26.8903	26.9744	26.9748	26.8956	27.1418	26.7247	0.308227	0.0658755	26.2741	27.2358	28.0179	0	26.6257	26.9112	26.9835	0	27.4271	26.7692	27.4017	0	26.7018	26.9507	26.6775	0	25.7622	26.4372	26.2923	0	26.5424	27.2471	26.8816	0	26.3284	27.5032	27.0915	0	26.1862	27.2675	27.4707	0
Glyma.17G256900.1	S982	1	Cold	StatsSet	25.2167	25.609	25.7999	25.5721	25.0206	25.3253	25.5642	25.6344	25.6804	25.9491	25.073	1.72e-06	9.15e-07	23.4007	25.1256	26.0209	26.3196	24.0016	25.8273	26.1211	26.4859	0	25.1227	25.9966	26.2805	23.4459	25.5695	26.2829	26.9901	23.7566	26.3047	24.2263	25.7951	23.6343	25.5317	26.024	26.1111	24.1183	26.3539	26.079	25.7056	24.7805	25.6842	26.2337	25.8392
Glyma.17G256900.1	S982	1	Control	StatsSet	23.8833	24.3871	24.9042	24.5822	24.3641	24.3766	25.4091	24.2296	24.869	24.3951	24.3102	1.72e-06	9.15e-07	22.791	24.6089	24.7215	23.4117	23.5652	24.8557	25.6576	23.4701	26.0117	25.1181	25.3232	23.1638	23.8645	25.2357	24.6464	0	23.8368	25.1748	24.5003	23.9443	24.4113	23.619	25.3586	24.1173	25.4152	24.7048	26.2558	25.2606	23.7155	24.5812	24.2963	24.3253
Glyma.18G019700.1	S343	1	Cold	StatsSet	25.456	25.7876	25.4951	25.6937	25.4879	25.7481	26.0026	26.0888	26.0539	26.3029	25.5693	0.191347	0.0422318	24.1864	25.6386	26.543	0	24.7395	26.5127	26.1106	0	24.1409	25.7728	26.5715	0	24.2689	25.8431	26.9693	0	24.6867	26.8265	24.9505	0	24.6165	25.9276	26.7002	0	24.4388	26.6724	26.8966	0	25.1504	26.3068	26.8092	0
Glyma.18G019700.1	S343	1	Control	StatsSet	25.238	25.5465	26.1949	25.4346	25.3911	25.2676	26.1916	25.3103	25.6707	25.2812	25.9474	0.191347	0.0422318	24.2918	25.6037	25.8186	0	24.6071	25.9002	26.1321	0	26.1161	26.2723	26.1964	0	24.8394	25.9302	25.5342	0	24.9985	26.0398	25.1351	0	25.5772	24.4434	25.7821	0	26.0688	25.5468	26.9592	0	25.3393	25.717	24.8747	0
Glyma.18G034300.1	S79	1	Cold	StatsSet	26.9791	26.5271	26.4499	25.8116	25.6758	25.4602	25.3016	24.9752	25.1353	25.1506	26.9579	0.00526041	0.00157898	27.0611	27.4278	0	26.4484	26.7438	26.4699	0	26.3678	26.3676	26.5914	0	26.3908	25.9065	26.0293	0	25.4989	25.7873	25.4437	0	25.7964	25.7826	25.4057	0	25.1924	25.6993	25.0493	0	25.1562	24.8906	25.2779	0	24.7571
Glyma.18G034300.1	S79	1	Control	StatsSet	27.4887	26.4251	26.061	26.0553	25.843	25.8498	25.5946	25.7743	25.6698	25.2691	26.6791	0.00526041	0.00157898	27.9651	27.2891	0	27.2119	26.6827	25.9029	0	26.6898	26.0848	25.6586	0	26.4396	25.8057	25.8621	0	26.4982	25.7732	25.5835	0	26.1725	25.5651	25.8756	0	26.1087	25.8072	25.3587	0	25.6178	25.872	25.9013	0	25.5495
Glyma.18G043600.1	S13	2	Cold	StatsSet	23.1822	23.7166	23.4171	23.5883	23.2568	23.3295	23.5515	23.6029	23.3332	23.7424	23.519	1.78e-07	1.18e-07	22.3999	23.5063	23.6403	0	22.5157	24.365	24.2692	0	22.2248	24.2604	23.7662	0	22.7186	24.2582	23.7882	0	22.5327	23.767	23.4707	0	22.6772	23.923	23.3883	0	23.3474	23.5047	23.8023	0	23.2523	23.8281	23.7284	0
Glyma.18G043600.1	S13	2	Control	StatsSet	24.0395	23.8504	24.0417	24.1321	23.8274	24.3029	24.2295	24.1481	24.025	23.8526	23.8505	1.78e-07	1.18e-07	23.5319	24.4744	24.1124	0	23.0273	23.9548	24.5691	0	23.845	24.027	24.2532	0	23.5469	24.5721	24.2773	0	23.3971	24.4068	23.6784	0	23.8111	24.4806	24.6172	0	23.5403	23.9022	25.2459	0	23.7	24.3925	24.3516	0
Glyma.18G043600.1	S8	1	Cold	StatsSet	29.1393	29.3328	29.0521	29.2193	26.2905	28.864	29.1301	29.1796	28.9652	29.4064	29.2445	0.360155	0.0750722	28.5968	29.2646	29.5566	0	28.39	30.0084	29.6	0	28.6056	29.4529	29.0978	0	28.334	29.8665	29.4574	0	28.1228	29.167	21.5816	0	27.9707	29.5487	29.0725	0	28.4931	29.2524	29.6447	0	28.6587	29.5237	29.3565	0
Glyma.18G043600.1	S8	1	Control	StatsSet	29.2972	29.1177	29.1974	29.2148	28.7922	29.3259	29.0872	29.1662	29.1938	28.9678	28.9122	0.360155	0.0750722	29.0196	29.5976	29.2745	0	28.8156	29.0671	29.4706	0	29.2462	29.1703	29.1757	0	28.8319	29.3569	29.4558	0	28.5333	29.0684	28.7749	0	29.0733	29.2112	29.6931	0	28.5353	28.755	29.9712	0	28.8386	29.3009	29.3592	0
Glyma.18G043600.1	S8	2	Cold	StatsSet	23.1822	23.7166	23.4171	23.5883	23.2568	23.3295	23.5515	23.6029	23.3332	23.7424	23.519	1.78e-07	1.18e-07	22.3999	23.5063	23.6403	0	22.5157	24.365	24.2692	0	22.2248	24.2604	23.7662	0	22.7186	24.2582	23.7882	0	22.5327	23.767	23.4707	0	22.6772	23.923	23.3883	0	23.3474	23.5047	23.8023	0	23.2523	23.8281	23.7284	0
Glyma.18G043600.1	S8	2	Control	StatsSet	24.0395	23.8504	24.0417	24.1321	23.8274	24.3029	24.2295	24.1481	24.025	23.8526	23.8505	1.78e-07	1.18e-07	23.5319	24.4744	24.1124	0	23.0273	23.9548	24.5691	0	23.845	24.027	24.2532	0	23.5469	24.5721	24.2773	0	23.3971	24.4068	23.6784	0	23.8111	24.4806	24.6172	0	23.5403	23.9022	25.2459	0	23.7	24.3925	24.3516	0
Glyma.18G050300.1	S12	1	Cold	StatsSet	23.7205	23.7872	24.0011	24.0371	23.609	23.6795	23.6703	23.8476	23.727	23.7917	23.7241	2.72e-13	6.79e-13	23.3268	24.2181	23.0712	24.2658	22.9659	23.7233	24.6723	0	23.3014	24.2128	24.1018	24.3885	22.8964	24.3162	24.2953	24.6407	22.8432	24.1833	23.7624	23.6471	23.0745	24.2397	23.7241	0	22.7673	24.1864	23.5004	24.2272	23.4114	24.1414	23.9647	23.8728
Glyma.18G050300.1	S12	1	Control	StatsSet	23.1879	23.1021	23.001	22.3759	22.4181	22.8413	22.9274	21.7142	22.6468	23.0605	22.9793	2.72e-13	6.79e-13	0	23.3363	23.4569	22.7706	22.5636	23.6582	23.6512	22.5355	0	23.2141	23.253	22.5358	22.4432	22.6885	22.5188	21.8531	0	22.8907	21.9023	22.4615	22.4635	23.1715	22.9247	22.8053	22.6383	23.576	23.1712	22.3242	21.0933	23.083	23.082	19.5985
Glyma.18G082000.1	S867	1	Cold	StatsSet	22.4703	21.8797	21.3102	22.4245	22.1125	22.5937	21.7848	22.8257	22.4907	21.4285	22.1209	1.64e-06	8.87e-07	23.1993	21.7267	22.485	0	22.648	21.9391	21.052	0	23.557	21.7706	18.603	0	23.3493	22.3495	21.5746	0	23.0413	21.442	21.8542	0	23.2242	22.4654	22.0917	0	23.6523	23.0617	18.6404	0	23.5461	22.7519	22.1792	0
Glyma.18G082000.1	S867	1	Control	StatsSet	23.4994	23.3457	23.0748	23.6266	23.5017	23.3309	23.1649	23.3486	23.0658	23.3157	23.3943	1.64e-06	8.87e-07	23.953	23.2215	23.3237	0	24.083	23.3118	22.6424	0	23.2722	23.1792	22.7729	0	23.9316	23.3932	23.5552	0	23.578	22.8034	24.1238	0	23.6881	23.1696	23.1349	0	23.4312	23.104	22.9596	0	23.8414	22.9978	23.2064	0
Glyma.18G106800.1	T187	2	Cold	StatsSet	24.4244	23.9318	23.6679	23.847	23.7588	23.831	23.5688	23.8869	24.1049	24.0662	24.2572	2.24e-09	2.23e-09	22.651	25.3567	24.0169	25.6728	22.6433	24.2193	24.0934	24.7711	21.9899	24.5054	23.635	24.5414	22.451	24.2587	23.4833	25.195	22.5084	24.2435	23.8491	24.434	22.2281	24.7272	23.8911	24.4774	22.1634	23.6583	23.1451	25.3084	22.3703	23.7917	24.0139	25.3716
Glyma.18G106800.1	T187	2	Control	StatsSet	21.9768	22.6197	22.7883	22.5697	22.425	23.5181	23.2326	23.4747	23.6537	23.4014	22.2567	2.24e-09	2.23e-09	19.5309	23.8998	23.5144	20.962	21.419	23.239	23.8411	21.9796	0	23.3546	23.4615	21.5487	20.992	23.6412	23.708	21.9375	21.4249	23.468	22.7583	22.0486	22.9347	23.9538	24.5203	22.6635	22.3897	23.5286	23.9912	23.021	0	23.3891	23.5953	23.4397
Glyma.18G137100.1	S9	1	Cold	StatsSet	24.7747	24.7721	24.9148	24.937	24.9573	25.1103	25.0238	25.0751	25.0218	25.0738	24.992	7.29e-06	3.57e-06	25.6439	24.6285	24.3415	24.4847	25.7273	24.8674	23.9433	24.5503	25.835	25.3869	24.0418	24.3955	25.8709	24.8443	24.2295	24.8033	25.4104	25.0425	24.3132	25.0629	25.7821	24.9764	24.6774	25.0053	25.7339	24.7791	24.4717	25.1104	25.9751	24.5981	24.6652	25.062
Glyma.18G137100.1	S9	1	Control	StatsSet	25.2147	25.2147	25.2055	25.4609	25.4538	25.1299	25.2211	25.4802	25.1804	25.4589	25.002	7.29e-06	3.57e-06	25.8883	25.1532	24.7776	25.0397	25.7128	25.0488	24.7895	25.3077	25.626	25.33	24.5084	25.3573	26.2303	25.0315	24.949	25.633	25.8944	25.515	25.366	25.0397	25.6516	25.3229	24.7593	24.7857	25.8593	25.0389	24.5705	25.4158	26.124	25.322	24.8234	25.6516
Glyma.18G146600.1	S737	1	Cold	StatsSet	27.1557	26.8341	26.958	27.2674	27.3014	27.299	27.4898	27.4391	27.249	27.3051	26.8171	9.22e-10	9.89e-10	25.9839	27.437	27.5153	27.6865	24.9151	27.1992	27.21	28.0121	24.8062	27.431	27.8372	27.7577	26.124	27.6035	0	28.0748	26.1109	27.4021	28.035	27.6576	25.8399	27.5106	27.5596	28.2858	25.7486	27.795	28.1202	28.2955	25.9462	27.69	27.6957	28.4244
Glyma.18G146600.1	S737	1	Control	StatsSet	26.4162	26.312	25.8582	26.3119	25.4031	26.5611	25.9835	26.5413	26.6865	26.6461	26.1454	9.22e-10	9.89e-10	25.7751	26.7897	26.8694	26.2306	25.7937	26.3217	27.044	26.0887	24.9552	26.4402	0	26.179	25.7853	26.8054	26.3451	0	25.1635	25.829	25.2167	0	26.0903	26.5359	27.057	0	25.0712	26.5094	26.37	0	25.6704	26.5927	27.1173	26.7846
Glyma.18G146700.1	S46	1	Cold	StatsSet	26.1418	25.666	25.7438	26.0422	26.0597	25.8858	25.7937	25.9364	25.8799	25.9263	25.9727	6.33e-05	2.52e-05	25.9043	26.2314	26.3924	26.0393	25.4048	25.8423	25.3099	26.1072	25.6251	25.6997	25.9195	25.7311	25.7215	26.0682	26.0427	26.3366	25.7126	25.7449	26.235	26.5464	25.4461	25.7508	25.6362	26.7102	25.5102	25.4556	26.0681	26.1409	25.6006	25.8842	26.0435	26.2172
Glyma.18G146700.1	S46	1	Control	StatsSet	26.2296	26.2285	26.3729	26.1451	26.0038	26.1485	26.0815	26.0896	26.1329	26.1957	26.2018	6.33e-05	2.52e-05	26.0647	26.342	26.3592	26.1526	26.0776	26.1209	26.1154	26.5999	26.0691	26.465	26.6343	26.3234	25.88	26.428	26.1604	26.1119	25.5911	26.0908	26.0724	26.2608	25.9865	26.4322	25.8093	26.366	26.023	26.2507	26.0036	26.0487	26.0314	26.3382	25.864	26.1247
Glyma.18G207900.1	S11	1	Cold	StatsSet	25.5189	26.5198	25.9148	26.1478	26.0011	26.2775	26.4322	26.4513	26.3787	26.5588	26.1324	1.33e-09	1.35e-09	24.443	25.2379	25.8477	26.5471	25.0772	26.4086	27.2352	27.3581	22.7681	26.4598	26.9767	27.4545	25.1436	26.1392	27.1605	0	25.0017	27.1303	25.4655	26.4069	25.6086	26.5464	26.588	26.3671	24.9358	27.3867	26.7168	26.6896	25.8518	26.7467	26.6613	26.5453
Glyma.18G207900.1	S11	1	Control	StatsSet	24.8417	24.9787	24.4332	24.2965	24.3212	24.6308	25.1033	23.6496	24.8438	24.2309	25.1343	1.33e-09	1.35e-09	0	25.3128	25.0882	24.1241	24.7699	25.5389	25.6095	23.9965	25.8629	26.0742	24.5181	21.2777	24.1581	24.9664	23.7651	0	24.0291	25.2243	23.728	24.3034	25.6719	24.0151	24.2054	0	25.9863	25.1163	24.0587	25.2519	23.9411	24.7443	21.5448	24.3682
Glyma.18G207900.1	S47	1	Cold	StatsSet	24.4451	25.2318	25.7263	25.3957	24.3781	24.812	25.0455	24.6936	24.8487	24.5422	25.3076	1.1e-05	5.06e-06	23.1685	25.592	24.5749	0	23.2225	25.9114	26.0517	25.7418	0	25.8778	25.5111	25.79	24.0942	25.9447	25.6554	25.8886	23.3817	25.7737	24.0435	24.3136	23.6657	25.661	25.729	24.1923	22.4588	25.9962	26.3442	25.3827	22.1617	0	26.2981	25.621
Glyma.18G207900.1	S47	1	Control	StatsSet	23.7693	24.4459	24.0854	24.0676	24.2167	24.1966	24.0044	23.1057	23.2496	23.9476	24.157	1.1e-05	5.06e-06	22.421	24.836	25.1703	22.65	23.711	24.9336	25.6707	23.4685	24.0272	25.4626	24.8646	21.9871	24.1109	23.9092	24.1827	0	23.0602	25.3534	24.2366	0	24.4662	23.4846	24.6391	0	24.9358	24.6971	23.8552	22.5293	22.6474	23.9636	24.073	21.7386
Glyma.18G210100.1	S331	1	Cold	StatsSet	24.1938	24.1436	24.1279	24.1417	24.3133	24.1453	24.074	24.302	24.0892	24.2347	24.0037	7.78e-06	3.7e-06	24.5816	24.0742	24.0234	24.0959	24.3898	23.668	24.2162	24.3003	23.8503	24.1341	24.4074	24.1199	24.1104	24.0094	24.0442	24.4028	24.9185	24.2932	23.6221	24.4194	24.2785	24.2021	23.9553	0	24.3199	23.9853	24.042	23.949	24.4749	24.1191	24.5269	24.0872
Glyma.18G210100.1	S331	1	Control	StatsSet	24.2847	24.3987	24.6628	24.5667	24.6029	24.4243	24.6929	24.3611	24.4495	24.324	24.6736	7.78e-06	3.7e-06	24.4872	24.4863	24.0329	24.1322	24.3661	24.3937	24.8936	23.9412	24.498	24.4757	25.1022	24.5753	24.8119	24.9942	24.2339	24.2267	24.5926	24.9298	24.41	24.4791	24.2441	24.7273	24.4538	24.2719	24.164	24.4161	25.5023	24.6892	24.3897	24.8542	23.8884	24.3123
Glyma.18G217500.1	S10	1	Cold	StatsSet	24.66	24.4921	24.5136	24.6524	24.8118	24.648	24.5339	24.6147	24.7844	24.8279	24.4246	0.00025979	9.19e-05	24.3082	25.0783	24.5936	0	24.7382	24.0937	24.6443	0	24.5776	24.4414	24.6666	24.369	24.6193	24.4469	24.6072	24.9362	25.0841	24.5312	24.5341	25.0977	24.5724	24.6799	24.7878	24.5518	24.8976	24.6523	24.0517	0	24.5894	24.6017	24.6529	0
Glyma.18G217500.1	S10	1	Control	StatsSet	24.3248	24.3597	24.6837	24.4136	24.4803	24.3509	24.5493	24.2383	24.5905	24.2178	24.4814	0.00025979	9.19e-05	24.534	24.2311	24.0835	24.4505	24.456	24.0671	24.4671	24.4486	24.7808	24.2674	24.6761	25.0103	24.8852	24.2003	24.0241	24.5449	24.5101	24.7049	24.1251	24.5813	24.2644	24.4474	24.2083	24.4836	24.607	24.3422	24.8723	24.3756	24.3404	24.3861	23.8589	24.3677
Glyma.18G255000.1	S354	1	Cold	StatsSet	26.5055	26.4761	26.5	26.4553	26.3732	26.1739	26.4962	26.224	26.348	26.6377	26.0941	1.41e-08	1.16e-08	25.9446	26.5613	26.5751	26.9413	25.3641	26.4489	27.1106	26.9809	25.9567	26.5346	26.6737	26.8349	25.5773	26.64	26.6182	26.9859	25.4986	26.582	26.7913	26.6209	25.4003	26.609	26.0282	26.6583	26.0177	26.52	26.8023	26.6447	25.8746	26.6374	26.1054	26.2784
Glyma.18G255000.1	S354	1	Control	StatsSet	25.6531	25.6655	25.6065	25.7451	25.1919	24.654	25.7917	25.6248	25.9084	25.7859	25.4635	1.41e-08	1.16e-08	25.3264	25.5491	25.7664	25.9706	25.6277	25.4345	26.1652	25.4347	25.5168	25.2588	25.9473	25.703	25.2863	26.0362	26.1902	25.4678	24.5578	24.9878	25.127	26.0949	25.0866	25.7227	26.4755	21.331	25.4627	25.3782	26.5315	25.7946	25.4831	25.4728	25.7558	25.7876
Glyma.18G265100.1	S393	1	Cold	StatsSet	30.8129	30.9562	30.7961	31.088	31.0339	30.8034	31.1158	31.0464	31.1142	31.2471	30.9494	1.49e-05	6.67e-06	30.6561	30.8226	30.96	0	30.7338	30.918	31.2168	0	30.5719	30.8563	30.9602	0	31.0796	30.6822	31.5023	0	30.5724	31.1239	31.4055	0	30.9018	30.5694	30.9389	0	31.1867	30.8021	31.3586	0	30.7621	31.1504	31.2268	0
Glyma.18G265100.1	S393	1	Control	StatsSet	30.7922	30.6562	30.8996	30.3643	30.1967	30.6787	30.6684	30.6671	30.5932	30.632	30.6626	1.49e-05	6.67e-06	30.8207	30.6994	30.8563	0	30.5487	30.9746	30.4454	0	31.6934	30.3072	30.6983	0	30.4544	29.9777	30.6609	0	30.6742	30.2515	29.6642	0	30.6031	30.6727	30.7603	0	30.5324	31.0732	30.3997	0	30.6396	30.5012	30.8604	0
Glyma.18G280500.1	S850	1	Cold	StatsSet	25.6589	26.4191	26.3252	26.816	26.445	26.3589	26.5359	26.6555	26.9004	26.686	26.0059	1.58e-18	1.33e-17	25.3254	26.6728	23.8635	26.774	24.9457	26.8906	26.8998	26.9404	24.7898	26.9565	26.3665	27.1879	25.3452	27.4257	26.9203	27.5726	24.7761	27.1565	26.798	27.0493	24.7958	27.1812	26.5673	26.8912	24.7067	27.0784	26.8878	27.4706	25.4863	26.8269	26.9752	27.3337
Glyma.18G280500.1	S850	1	Control	StatsSet	24.5162	24.9772	25.0713	24.3812	23.9772	25.0643	23.7081	25.08	25.3695	25.2547	24.8199	1.58e-18	1.33e-17	22.9837	25.1705	25.1483	24.7623	24.3729	24.9204	25.4479	25.1676	0	25.1457	24.8019	25.2664	23.0392	25.6863	24.033	24.7665	22.9125	24.9812	23.3596	24.6556	0	25.0592	25.0875	25.0463	20.8356	25.3412	24.2973	24.3585	24.0988	25.3074	25.5002	25.4136
Glyma.18G280500.1	S879	1	Cold	StatsSet	27.175	27.3154	27.3527	27.4702	27.5032	27.3277	27.4383	27.4175	27.344	27.5101	27.261	3.72e-09	3.59e-09	26.8574	27.3966	27.2712	0	27.0373	27.3016	27.6072	0	26.6251	27.5897	27.8433	0	26.8235	27.6647	27.9225	0	27.4033	27.8437	27.2625	0	26.8624	27.7338	27.3869	0	27.1237	27.653	27.5383	0	27.1905	27.5893	27.4727	0
Glyma.18G280500.1	S879	1	Control	StatsSet	26.7724	26.8781	27.0773	26.5021	26.4086	26.8302	27.2558	26.8722	26.6813	26.8606	26.9794	3.72e-09	3.59e-09	26.1123	27.0074	27.1975	0	26.4155	26.9987	27.22	0	26.62	26.9947	27.6172	0	26.2925	26.6195	26.5943	0	26.7842	26.5509	25.8908	0	26.394	27.0464	27.0502	0	26.8344	27.1841	27.7488	0	26.7838	27.1292	26.7038	0
Glyma.18G280500.1	S879	2	Cold	StatsSet	26.8081	26.8507	26.8649	26.6715	26.9237	26.8804	26.8702	26.9143	26.8308	26.8159	26.6297	2e-05	8.64e-06	26.0148	27.1377	27.2718	0	26.5448	26.6243	27.383	0	25.8452	27.2716	27.4779	0	26.3063	27.0381	26.6702	0	26.6068	27.3799	26.7844	0	26.4733	27.3419	26.8262	0	26.3298	27.2373	27.0436	0	26.4718	27.2375	27.0334	0
Glyma.18G280500.1	S879	2	Control	StatsSet	26.2315	26.3565	26.553	26.2355	25.8626	26.3884	26.6576	26.2392	26.3144	26.3881	26.4378	2e-05	8.64e-06	25.9293	26.3513	26.414	0	26.1703	26.2036	26.6958	0	26.3634	26.3016	26.994	0	26.2343	26.4898	25.9823	0	26.5897	26.1174	24.8808	0	26.2018	26.2795	26.6839	0	26.3566	26.3631	27.2531	0	26.4524	26.3005	25.9647	0
Glyma.18G280500.1	S893	1	Cold	StatsSet	26.8521	26.7371	26.823	26.868	26.8342	26.6684	26.4309	26.6656	26.8608	26.845	26.7291	9.7e-11	1.19e-10	26.5593	27.2604	26.7365	0	26.0557	26.8488	27.3066	0	26.5002	26.7657	27.203	0	26.2319	27.0282	27.344	0	26.487	26.9273	27.0882	0	26.3492	26.6499	27.0062	0	25.8001	27.0279	26.4647	0	26.443	26.9998	26.554	0
Glyma.18G280500.1	S893	1	Control	StatsSet	26.1403	26.2655	26.0541	25.7622	25.8774	25.8524	26.133	26.0551	26.2383	25.9736	26.1935	9.7e-11	1.19e-10	25.759	26.2168	26.4451	0	25.7763	26.0462	26.974	0	25.2753	26.3245	26.5625	0	26.0753	25.5067	25.7045	0	25.8371	26.143	25.652	0	25.2403	26.1122	26.2047	0	25.7687	26.1504	26.4799	0	25.5276	26.377	26.2607	0
Glyma.18G280500.1	S893	2	Cold	StatsSet	26.8081	26.8507	26.8649	26.6715	26.9237	26.8804	26.8702	26.9143	26.8308	26.8159	26.6297	2e-05	8.64e-06	26.0148	27.1377	27.2718	0	26.5448	26.6243	27.383	0	25.8452	27.2716	27.4779	0	26.3063	27.0381	26.6702	0	26.6068	27.3799	26.7844	0	26.4733	27.3419	26.8262	0	26.3298	27.2373	27.0436	0	26.4718	27.2375	27.0334	0
Glyma.18G280500.1	S893	2	Control	StatsSet	26.2315	26.3565	26.553	26.2355	25.8626	26.3884	26.6576	26.2392	26.3144	26.3881	26.4378	2e-05	8.64e-06	25.9293	26.3513	26.414	0	26.1703	26.2036	26.6958	0	26.3634	26.3016	26.994	0	26.2343	26.4898	25.9823	0	26.5897	26.1174	24.8808	0	26.2018	26.2795	26.6839	0	26.3566	26.3631	27.2531	0	26.4524	26.3005	25.9647	0
Glyma.18G296500.1	S69	1	Cold	StatsSet	26.3139	26.3647	26.6807	26.2311	26.8695	25.7147	26.6129	26.3463	26.4743	26.5532	26.4761	1.52e-06	8.37e-07	27.0924	25.6761	26.1732	0	27.3535	25.6555	26.0852	0	27.349	26.0523	26.6409	0	26.6812	25.5876	26.4245	0	27.3491	26.5108	26.7487	0	24.5281	26.3366	26.2793	0	27.3408	26.1843	26.3136	0	27.1452	26.0044	25.8895	0
Glyma.18G296500.1	S69	1	Control	StatsSet	25.8232	25.4883	24.4965	24.9506	25.2989	25.7867	25.0402	25.6464	25.7576	25.3658	26.3064	1.52e-06	8.37e-07	26.3005	25.1312	26.0377	0	25.9936	25.8165	24.6548	0	23.6646	23.8876	25.9374	0	24.3534	24.4248	26.0736	0	26.699	25.0018	24.196	0	26.0591	26.0964	25.2047	0	26.5504	23.9711	24.599	0	26.1235	25.7268	25.089	0
Glyma.19G007300.1	S335	1	Cold	StatsSet	25.6277	25.3333	26.0456	25.6972	26.4343	25.9947	25.8606	26.4798	26.5322	26.4341	25.2671	3.46e-07	2.17e-07	25.029	26.0809	25.7732	0	23.8677	25.9505	26.1818	0	25.2152	26.1919	26.7296	0	24.8041	25.9522	26.3354	0	25.4655	26.855	26.9824	0	24.265	26.5764	27.1427	0	23.4678	26.6013	27.5128	0	25.5029	26.7409	27.1955	0
Glyma.19G007300.1	S335	1	Control	StatsSet	24.2126	25.3127	25.3541	24.663	23.9771	25.4281	25.0149	25.2112	25.3972	25.8075	24.3271	3.46e-07	2.17e-07	21.9459	25.3446	25.3473	0	25.2941	24.6978	25.9461	0	25.6196	25.0493	25.3934	0	23.926	25.4081	24.6548	0	22.9379	24.6184	24.3751	0	25.1141	25.2345	25.9358	0	24.0523	25.2862	25.7064	0	24.7755	25.0679	25.7902	0
Glyma.19G046800.1	S113	1	Cold	StatsSet	21.6783	22.1401	21.4192	21.1817	22.7153	22.1889	22.4028	22.2173	22.3729	22.3112	22.2082	0.00177633	0.000552846	24.1502	22.2635	21.9658	18.3337	24.0003	21.5792	20.8409	0	24.3108	22.1423	0	17.8044	23.812	21.5967	21.5375	17.7808	23.983	22.2285	21.9344	0	23.1108	21.3453	22.1106	0	23.3095	21.9515	21.9474	0	23.3571	21.7043	21.9219	21.886
Glyma.19G046800.1	S113	1	Control	StatsSet	22.1286	22.2185	21.7956	22.9027	24.1748	22.7408	23.1017	23.8041	23.1542	23.5851	21.7576	0.00177633	0.000552846	24.5004	22.2077	21.8215	19.9848	24.3297	23.1723	21.7018	19.6702	23.3553	22.7698	21.0719	19.9854	24.5624	22.3984	23.3012	21.3488	24.3595	22.3891	25.7758	0	24.4838	22.9467	22.5707	20.9619	23.5943	22.8043	21.3876	24.6207	24.2989	22.8513	23.1565	24.9095
Glyma.19G061100.1	S3	1	Cold	StatsSet	25.5207	26.298	26.1577	26.079	25.953	26.1621	26.272	26.4952	26.4692	26.7289	25.9873	0.0233972	0.00634608	25.8513	25.2625	25.4483	0	27.0773	26.3985	25.4182	0	26.4949	26.4201	25.5582	0	26.24	26.2358	25.7612	0	26.2965	27.31	24.2524	0	26.1279	26.5552	25.8032	0	25.8663	27.1604	25.7892	0	26.8866	26.7604	25.8385	0
Glyma.19G061100.1	S3	1	Control	StatsSet	26.6239	26.4876	26.7591	26.3098	26.8098	26.2735	26.8848	26.1937	26.2083	25.972	26.9283	0.0233972	0.00634608	26.9463	27.2463	25.679	0	26.5282	27.294	25.6406	0	27.2422	27.145	25.89	0	26.5552	26.8323	25.5418	0	27.4992	27.0734	25.8567	0	27.6552	25.5899	25.5755	0	27.8259	26.6579	26.1706	0	27.5474	26.4608	24.573	0
Glyma.19G092100.1	S300	1	Cold	StatsSet	26.2186	25.7846	26.1809	26.3158	25.6324	26.1462	26.0324	26.0119	26.2903	26.2786	25.9962	0.200162	0.0438905	24.6639	26.091	24.3049	29.8148	22.4658	24.787	25.702	30.1838	23.8645	25.5407	25.4074	29.911	24.3263	25.684	25.113	30.1397	23.9588	24.386	25.0289	29.156	23.5744	25.147	25.6238	30.2396	23.7819	25.421	25.0498	29.8769	22.4266	25.2348	26.4594	29.9269
Glyma.19G092100.1	S300	1	Control	StatsSet	25.4117	26.3672	25.7062	25.5601	25.7823	25.9594	26.0073	25.6315	26.0736	27.0013	25.0843	0.200162	0.0438905	23.7199	24.5766	25.0725	28.2776	24.2902	24.9562	26.0508	30.1716	23.3687	25.259	25.7446	28.4526	25.0572	24.119	24.642	28.4221	24.0793	25.4292	25.1616	28.4591	23.8012	24.4026	25.9993	29.6346	24.628	26.1073	24.6067	28.6872	23.8308	24.0695	26.087	28.5388
Glyma.19G099000.1	T129	1	Cold	StatsSet	25.4573	25.2345	25.3031	25.3487	25.2591	25.3168	25.4112	25.3315	25.2597	25.5854	25.3862	4.46e-09	4.18e-09	24.9582	25.7833	25.4424	25.6453	24.264	25.1586	25.984	25.5316	24.8099	25.2434	25.4901	25.6691	25.1077	25.2732	25.5638	25.4503	25.0562	25.3708	0	25.3503	25.3973	25.3319	25.1569	25.3812	25.4023	25.4067	25.375	25.4609	25.0563	25.552	25.6883	25.0296
Glyma.19G099000.1	T129	1	Control	StatsSet	24.7132	24.6348	24.7392	24.449	24.4575	24.7901	24.0444	24.6469	24.6363	24.8801	24.7968	4.46e-09	4.18e-09	24.6868	24.5875	24.8828	24.6956	24.4516	24.5491	25.1036	24.4348	24.0075	24.5606	25.0987	25.2899	24.6259	24.3391	24.6236	24.2074	24.5467	24.5898	24.136	24.5577	24.0839	25.2021	24.8482	25.0261	21.233	24.6035	25.7322	24.6091	24.7376	24.2556	24.9907	24.6037
Glyma.19G150300.1	S507	1	Cold	StatsSet	24.1151	24.0216	24.3961	24.686	24.1403	24.3306	23.7846	23.8807	24.193	23.5202	24.4507	1.34e-09	1.35e-09	24.0795	24.4405	23.8253	0	23.249	24.114	24.7017	0	24.3059	24.511	24.3715	0	24.4621	24.4414	25.1544	0	23.5492	24.1827	24.6891	0	24.0422	23.8577	25.0918	0	23.4461	23.906	24.0016	0	22.9657	23.9806	24.6959	0
Glyma.19G150300.1	S507	1	Control	StatsSet	23.337	23.1439	23.4027	22.9022	23.1404	23.405	23.2885	23.4723	23.011	23.5824	22.9427	1.34e-09	1.35e-09	23.0814	23.4656	23.4639	0	22.5654	23.5568	23.3095	0	23.1794	23.1171	23.9115	0	22.9446	22.8694	22.8927	0	23.1754	23.0409	23.2048	0	23.0666	23.7531	23.3952	0	23.3766	23.6312	22.8577	0	23.1315	23.8382	23.4471	0
Glyma.19G150300.1	S643	1	Cold	UniqueSet	21.2093	21.377	0	21.5964	21.5506	21.7453	21.5401	21.4307	21.5494	21.4977	21.2735	NA	NA	21.3538	0	21.8691	20.4049	21.9798	21.132	0	21.0192	21.4204	0	0	0	21.6249	21.2149	21.8634	21.6825	22.0913	0	21.2411	21.3195	22.2238	21.9506	0	21.0617	21.3818	21.33	22.133	21.3155	21.1385	21.8054	21.4149	21.3639
Glyma.19G150300.1	S643	1	Control	UniqueSet	21.3168	21.4246	21.4533	21.3173	21.7155	21.6737	21.6135	21.1992	21.0929	21.4085	21.5604	NA	NA	21.3631	21.4258	21.3671	21.1111	21.393	21.557	21.5117	21.2369	21.5929	21.1429	21.8974	21.1801	21.126	21.3025	21.3562	21.4843	21.4347	21.9721	21.8316	21.6235	21.6688	22.0021	21.5355	21.4883	21.7168	21.3599	21.7639	0	21.578	20.8271	21.36	21.0315
Glyma.19G168100.1	S366	1	Cold	StatsSet	29.13	29.0896	29.2586	29.1723	29.2039	28.8508	28.8173	28.9299	28.8209	28.9334	28.9146	0.644637	0.128427	28.616	28.9544	29.4478	29.5016	29.6353	28.4431	30.147	28.1329	29.3568	28.4851	29.8553	29.3373	29.0776	28.7947	30.1462	28.6705	29.5435	28.3311	29.8002	29.1408	29.3439	27.8469	29.7739	28.4385	29.7305	28.0718	29.3711	28.0959	29.7518	28.4126	29.869	27.6862
Glyma.19G168100.1	S366	1	Control	StatsSet	29.0304	28.9062	29.2017	28.846	28.9714	29.183	29.4937	28.7692	29.022	28.9459	29.2969	0.644637	0.128427	28.5702	28.4028	29.9877	29.161	28.4155	28.7126	30.3262	28.1705	28.7939	27.9738	30.4632	29.5758	29.3294	27.5458	29.4813	29.0274	28.877	28.4456	29.4463	29.1166	28.4524	29.0206	29.8357	29.4232	29.2089	28.9213	30.7553	29.0892	28.4777	28.403	29.6824	28.5137
Glyma.19G176200.1	S238	1	Cold	StatsSet	24.4488	24.486	25.0181	24.2261	24.6128	24.4263	24.236	24.2757	24.2891	23.9987	24.4891	6.73e-09	6.21e-09	25.0118	23.7142	24.6205	0	25.4874	24.3027	23.668	0	25.7376	25.2598	24.0569	0	24.8476	24.3232	23.5074	0	25.1597	24.6902	23.9887	0	24.1428	24.6959	24.4401	0	23.8947	24.5959	24.2175	0	24.1947	24.315	24.3174	0
Glyma.19G176200.1	S238	1	Control	StatsSet	25.2074	25.2464	25.2321	25.4099	25.7094	24.8886	24.8047	24.9597	24.5642	25.1112	25.3308	6.73e-09	6.21e-09	25.4153	25.1815	25.0254	0	25.5754	25.1126	25.0511	0	25.1566	25.5187	25.0209	0	26.0389	25.3569	24.834	0	25.9584	25.9284	25.2414	0	25.0442	24.8894	24.7321	0	25.1632	24.8245	24.4262	0	25.3616	25.1622	24.3552	0
Glyma.19G179000.1	S45	1	Cold	StatsSet	22.7269	22.7535	22.6521	22.6061	22.1446	22.0977	22.0618	22.0252	22.0889	21.0221	22.8549	1.07e-05	4.93e-06	22.5491	22.6627	22.5944	23.1016	22.298	23.3154	22.6473	0	22.3509	23.0853	22.1899	22.9823	21.8815	23.0152	22.0943	23.4333	21.266	22.4556	22.1932	22.6638	21.8633	22.2125	21.6872	22.628	21.0557	21.8135	22.2767	23.1013	20.7396	22.6365	21.6651	23.0597
Glyma.19G179000.1	S45	1	Control	StatsSet	23.0388	22.7325	22.8921	22.9777	22.8149	22.7916	22.8733	22.7279	22.8615	22.8651	22.8502	1.07e-05	4.93e-06	22.8319	23.3643	23.281	22.6778	22.737	22.7719	22.6146	22.8064	23.0235	22.7387	22.9142	0	23.354	22.9825	22.6482	22.9262	22.8405	22.969	22.6635	22.7868	22.6134	0	22.9389	22.8226	22.9096	23.0648	22.6428	22.8761	22.8302	22.7976	22.5606	22.7232
Glyma.19G210600.1	S171	1	Cold	StatsSet	25.3785	26.8264	26.4032	26.2912	26.2059	26.792	27.1238	27.5802	27.2229	27.3281	25.9478	0.00179906	0.000557351	25.8755	27.1417	23.1182	0	27.1563	29.1881	24.1349	0	25.709	28.3876	25.1131	0	26.2072	27.9435	24.7229	0	26.9839	29.8925	21.7413	0	26.3739	29.0562	24.9458	0	27.3253	29.7885	24.2576	0	28.4434	29.1971	25.1	0
Glyma.19G210600.1	S171	1	Control	StatsSet	27.0212	27.6985	28.8043	27.3786	27.8065	27.2824	28.0925	27.0511	27.7012	26.5398	27.9215	0.00179906	0.000557351	26.5654	28.3843	26.114	0	27.3554	28.6639	27.0763	0	30.7018	29.239	26.4721	0	26.9881	29.6701	25.4776	0	27.6071	28.474	27.3385	0	29.2076	26.7974	25.8423	0	29.4655	28.1487	26.6632	0	27.9916	28.5069	24.6547	0
Glyma.19G217400.1	S138	1	Cold	StatsSet	25.4318	25.4358	25.6097	24.7893	25.3362	25.1522	25.0327	25.6422	24.8573	25.0886	24.3499	0.0068085	0.00200135	24.1917	25.3673	25.6379	26.5305	24.2479	24.9411	0	27.1183	24.5899	25.8327	25.187	26.8294	24.0883	25.9633	22.6976	26.408	24.4985	0	25.2265	26.2835	24.0129	25.6503	24.977	25.9687	23.7637	24.8498	0	26.4846	24.5406	24.9181	26.235	26.8753
Glyma.19G217400.1	S138	1	Control	StatsSet	24.8251	24.3477	24.2815	24.2985	23.9144	24.7679	24.4211	25.0376	25.123	24.9204	24.5894	0.0068085	0.00200135	25.7259	24.5016	24.7439	24.3291	23.5832	24.1506	25.2778	24.3789	22.4536	24.7195	24.9154	25.0374	23.3139	25.3617	24.0736	24.445	24.6704	24.6561	22.5354	23.7957	25.1082	24.6604	24.5327	24.7702	23.985	24.4272	24.2317	25.0405	26.1634	24.3194	24.7524	24.9153
Glyma.19G246000.1	S128	1	Cold	StatsSet	25.0024	25.0532	25.2329	24.8933	25.3008	24.9188	25.1296	25.0211	25.1535	25.2152	25.2158	0.0278953	0.00744648	25.4121	24.6739	24.9213	0	25.2842	25.2629	24.6126	0	25.6951	25.0125	24.9911	0	24.7614	24.7685	25.15	0	25.5553	25.1653	25.1818	0	24.6568	24.747	25.3524	0	25.7846	24.3797	25.2246	0	25.1479	24.5487	25.3666	0
Glyma.19G246000.1	S128	1	Control	StatsSet	24.7795	25.1393	24.8472	24.6982	24.9374	24.7903	25.1212	24.9148	24.9741	24.715	25.1637	0.0278953	0.00744648	25.0289	24.5331	24.7766	0	25.6815	25.1072	24.6292	0	24.987	24.6237	24.931	0	25.3802	23.9771	24.7374	0	25.1273	25.1931	24.4919	0	24.7042	24.7956	24.8711	0	25.1495	24.9925	25.2217	0	25.1449	24.7499	24.8496	0
Glyma.19G249900.1	S1820	1	Cold	StatsSet	26.1181	25.851	26.0301	26.0482	25.9854	26.2422	26.126	26.3343	26.0443	26.4641	25.517	0.00120879	0.000383276	26.7707	25.8973	25.6863	0	26.3673	25.5071	25.6787	0	26.7388	25.8834	25.4682	0	26.6423	26.0209	25.4814	0	26.4394	25.8802	25.6366	0	26.4214	26.4205	25.8846	0	26.2994	26.4475	25.6311	0	26.5771	26.6279	25.798	0
Glyma.19G249900.1	S1820	1	Control	StatsSet	26.3629	26.2652	26.5553	26.5395	26.7176	26.5381	26.1759	26.4549	26.2599	26.5034	26.2735	0.00120879	0.000383276	26.1237	26.7503	26.2145	0	26.0301	26.5415	26.2239	0	26.6178	27.047	26.0012	0	26.1963	26.7692	26.6531	0	26.3476	26.3214	27.4836	0	26.4372	26.7525	26.4245	0	25.963	26.3687	26.1959	0	25.9225	27.0499	26.3924	0
Glyma.20G019300.1	S1280	1	Cold	StatsSet	25.0374	24.384	24.4457	24.721	24.7788	24.6697	24.9192	24.9736	24.9351	25.082	24.6035	8.74e-08	6.21e-08	23.9231	25.5119	25.6771	0	22.7385	25.191	25.2226	0	23.1582	25.3786	24.8004	0	23.2218	25.459	25.4822	0	23.4578	25.3321	25.5464	0	23.2205	25.3291	25.4595	0	23.3487	25.2199	26.189	0	23.4876	25.3353	26.0978	0
Glyma.20G019300.1	S1280	1	Control	StatsSet	24.0513	23.7288	23.6603	23.4856	23.2159	24.0808	23.35	23.851	24.2181	24.344	23.9946	8.74e-08	6.21e-08	23.6293	24.1343	24.3903	0	23.3971	23.4314	24.3578	0	22.8409	23.6549	24.4851	0	22.2403	24.4771	23.7394	0	23.2027	23.613	22.8321	0	23.5978	24.4148	24.2298	0	22.5427	23.6045	23.9029	0	23.5471	23.9927	24.0133	0
Glyma.20G025500.1	S284	1	Cold	StatsSet	26.1927	24.4841	26.3082	26.2836	26.494	26.3912	26.2589	26.1794	26.3921	26.548	26.3008	0.106321	0.0250193	26.2273	26.5226	26.1181	25.9029	26.46	26.1044	20.8879	0	26.0558	26.4696	26.559	26.1485	26.0169	26.058	26.4488	26.6106	26.7015	26.7235	25.8111	26.7401	26.4373	26.646	26.334	26.1474	26.2464	26.9989	0	25.5313	26.0482	26.8055	26.2492	25.6147
Glyma.20G025500.1	S284	1	Control	StatsSet	25.9723	26.0487	25.1548	25.9149	26.1271	26.0765	26.3386	25.7475	26.1592	24.8535	26.2425	0.106321	0.0250193	25.6258	26.1897	25.9734	26.1005	25.6778	26.2315	26.0347	26.2506	21.9427	26.1213	26.7634	25.7915	25.9994	25.8352	25.7284	26.0965	25.9379	26.4148	25.941	26.2148	25.4615	26.8121	25.9358	26.0967	26.0792	26.5454	26.7865	25.9433	25.5255	26.3345	25.6402	25.4899
Glyma.20G070700.1	S570	1	Cold	StatsSet	25.673	25.5327	25.4218	25.4538	25.4943	25.5289	25.5627	25.3323	25.5962	25.4083	25.7989	2.74e-05	1.18e-05	25.2085	25.7128	26.1012	25.6694	25.3923	25.8495	25.1954	25.6936	25.518	25.0566	25.5454	25.5672	25.3631	25.1223	25.7971	25.5329	25.6239	25.1241	25.8641	25.3652	25.4865	25.0581	25.8757	25.6954	25.4989	24.9672	26.0237	25.7609	25.5805	25.0827	25.1468	25.5192
Glyma.20G070700.1	S570	1	Control	StatsSet	25.1794	25.2407	25.0989	25.3394	25.1127	25.3192	25.1726	25.1669	25.342	25.0932	25.2012	2.74e-05	1.18e-05	25.8946	24.4458	25.0521	25.325	25.4076	24.8243	25.109	25.6218	25.0529	24.6006	24.9726	25.7693	25.5641	24.8651	25.2157	25.7128	25.3852	24.9328	24.9225	25.2102	25.8265	24.7972	24.8518	25.8012	25.6242	24.7599	25.1975	25.1086	25.7402	24.4174	25.3804	25.1295
Glyma.20G084100.1	S138	1	Cold	StatsSet	25.0573	24.9053	25.2934	25.0688	24.8969	25.0183	25.4318	25.2488	25.3605	24.1892	25.1847	8.18e-09	7.18e-09	24.1132	24.6238	25.6238	25.8684	23.5601	24.4172	25.3059	26.3379	25.1268	24.6749	25.1691	26.2028	24.47	24.3404	25.3975	26.0674	24.0886	24.437	25.4593	25.6029	24.6354	24.5321	25.2117	25.6937	24.6579	24.9618	25.9148	26.1928	24.7214	24.8731	25.5065	25.894
Glyma.20G084100.1	S138	1	Control	StatsSet	23.9964	23.9714	22.7905	23.7578	23.5526	24.5333	23.8605	24.2085	24.2746	24.3766	24.1804	8.18e-09	7.18e-09	24.3108	23.317	24.3615	0	23.9213	23.3948	24.3984	24.171	22.1799	23.0568	24.3591	21.5663	23.8653	23.0155	23.4052	24.7451	24.2989	22.8661	22.7953	24.2503	24.8755	23.7647	24.6172	24.8758	24.6024	23.4585	23.4091	23.9719	24.7236	23.1758	24.5772	24.3576
Glyma.20G084100.1	S567	1	Cold	StatsSet	25.0697	24.7428	24.8736	25.0308	25.2542	25.2187	25.1132	25.1963	25.3106	24.1852	25.0612	0.00913458	0.00260304	24.7509	25.4643	25.4849	24.5785	25.0114	24.9126	24.6668	24.3805	25.1639	24.7797	25.1867	24.3643	25.2522	24.9893	25.1322	24.7496	25.7719	24.7244	25.1205	25.4001	25.296	24.9603	25.3997	0	25.4229	24.8194	25.4697	24.7408	25.5704	24.7249	25.2936	0
Glyma.20G084100.1	S567	1	Control	StatsSet	25.09	25.234	25.373	25.3656	25.2114	25.2443	25.1741	25.1744	25.2639	25.1506	25.1926	0.00913458	0.00260304	25.2941	24.5806	25.2608	25.2243	25.2289	25.0969	25.2621	25.348	25.0072	25.1108	25.6523	25.7216	25.0602	25.3412	25.6373	25.4238	24.8439	25.2141	25.4635	25.324	25.0881	25.4177	25.0758	25.3956	25.0799	24.6305	25.6172	25.3691	25.1447	24.6415	25.5138	25.3977
Glyma.20G089400.1	S401	1	Cold	StatsSet	24.1617	24.0953	24.1426	23.9304	24.0498	24.097	24.0091	24.3082	23.9441	24.2823	24.0268	0.00709584	0.00206565	24.3246	24.2469	24.3124	23.7628	24.228	24.1612	23.8967	0	24.5855	24.087	24.1941	23.7038	23.9541	24.206	24.0858	23.4756	24.3489	23.746	24.228	23.8763	23.8352	24.3538	24.3794	23.8195	23.9521	24.3259	24.1152	23.6433	24.2622	24.4963	24.1663	0
Glyma.20G089400.1	S401	1	Control	StatsSet	24.2886	24.2427	24.2983	24.4611	24.1967	24.3432	24.232	24.1639	24.0637	24.1351	24.2556	0.00709584	0.00206565	24.2233	24.1309	24.5997	24.2006	24.1815	23.9217	24.2395	24.628	23.9001	24.2604	24.1703	24.8623	24.3347	24.116	24.8298	24.5637	24.1776	24.2604	24.0296	24.3193	24.4423	24.3203	24.2484	24.3616	23.8999	24.3243	24.616	24.0879	24.0433	24.0026	24.4923	24.1175
Glyma.20G126600.1	S514	1	Cold	StatsSet	26.9126	26.6257	27.0754	26.8351	27.0942	27.2322	26.8202	26.8767	27.0116	27.0537	26.7033	9.4e-09	8.14e-09	27.5481	26.6293	0	26.5604	27.5178	26.4272	0	25.9321	27.7728	27.1543	0	26.2992	27.4525	27.0112	0	26.0415	27.4293	27.2861	0	26.5672	27.3061	27.4115	0	26.9789	27.1144	27.5419	0	25.8043	27.5121	27.3199	0	25.7982
Glyma.20G126600.1	S514	1	Control	StatsSet	27.752	27.5852	27.6821	27.6143	27.6278	27.8797	27.6717	27.8841	27.6537	27.6646	27.5725	9.4e-09	8.14e-09	27.6427	28.0089	0	27.6043	27.5493	27.701	0	27.5054	27.5112	27.6465	0	27.8884	27.4166	27.8598	0	27.5666	27.6792	27.3395	0	27.8647	27.9533	27.886	0	27.7999	27.4446	27.6953	0	27.8752	27.6736	28.1595	0	27.8191
Glyma.20G143300.1	S142	1	Cold	StatsSet	24.4694	24.7635	24.5393	24.702	24.4541	24.5662	24.9806	24.5647	24.6799	25.1403	24.8499	3.33e-11	4.61e-11	23.3171	24.699	25.1026	24.7589	23.3915	25.0719	25.3331	25.2575	22.876	25.1176	25.0298	25.1337	23.8385	24.9275	24.9645	25.0776	23.4007	25.0793	24.8076	24.5287	23.8687	24.85	24.8847	24.6612	24.2276	25.0836	25.1319	25.4794	22.5213	25.4328	25.5114	24.7932
Glyma.20G143300.1	S142	1	Control	StatsSet	23.4235	23.4617	23.2953	23.3727	23.0883	23.7172	23.4005	23.1588	24.0513	24.0199	23.3052	3.33e-11	4.61e-11	23.5091	23.5984	24.1146	22.4721	23.0474	22.9718	23.9746	23.8531	22.7651	23.1673	23.5356	23.7131	23.8904	23.2696	23.4504	22.8803	24.1073	23.1294	22.5123	22.6042	23.9197	23.393	24.2167	23.3394	23.3631	23.4847	24.2509	22.5032	23.0454	23.2691	23.6187	22.702
Glyma.20G144400.1	S415	1	Cold	StatsSet	24.5258	24.6518	24.6353	24.6932	24.6205	24.6307	24.5919	24.5457	24.6052	24.8718	24.5189	1.84e-10	2.14e-10	24.236	24.8024	24.5392	0	24.3112	24.381	25.2633	0	24.0643	24.929	24.9126	0	24.0515	25.056	24.9721	0	23.9654	25.0341	24.8622	0	24.2295	24.9299	24.7329	0	24.0587	24.8484	24.8685	0	24.1269	24.9504	24.5597	0
Glyma.20G144400.1	S415	1	Control	StatsSet	23.8708	23.91	24.1476	23.7092	23.358	23.8974	24.0296	23.7859	23.9033	24.0411	24.0937	1.84e-10	2.14e-10	23.5792	23.7433	24.2899	0	23.6405	23.7827	24.3067	0	23.9922	24.0603	24.3901	0	23.698	23.7452	23.6845	0	23.8142	23.7192	22.5404	0	23.5816	23.6632	24.4474	0	23.6861	23.9585	24.4442	0	23.843	23.7771	23.7376	0
Glyma.20G150900.1	S215	1	Cold	StatsSet	27.6178	27.8346	27.5486	27.6272	27.8537	27.7756	27.6625	27.7505	27.6517	27.5977	27.7055	0.267031	0.0577001	28.9852	27.0142	26.8542	0	29.2106	27.0712	27.2221	0	29.0924	26.8149	26.7387	0	29.2338	27	26.6478	0	28.9042	27.5206	27.1361	0	28.9603	27.2412	27.1252	0	28.4733	27.7782	26.736	0	28.6217	27.9333	26.6965	0
Glyma.20G150900.1	S215	1	Control	StatsSet	28.6661	28.3387	28.1906	25.372	28.5264	28.0696	27.9569	28.5631	27.9686	28.1806	28.3248	0.267031	0.0577001	29.2572	29.0783	27.6627	0	29.2083	28.1046	27.7031	0	28.6489	28.5494	27.3734	0	28.7012	19.5935	27.8214	0	29.2026	27.1023	29.2742	0	28.9216	27.9529	27.3343	0	28.8313	28.1329	26.9064	0	29.1834	29.0297	27.4762	0
Glyma.20G150900.1	S242	1	Cold	StatsSet	28.319	27.3238	26.947	26.7807	26.8244	26.9478	26.6031	26.4928	26.4358	26.5296	27.9883	9.26e-07	5.3e-07	28.0648	28.5691	28.4027	28.2395	27.6437	27.5332	26.7834	27.335	26.7966	26.6745	27.1694	27.1477	27.0938	26.5652	26.7748	26.6889	27.2964	26.2871	26.7657	26.9483	27.0599	26.4414	27.1417	27.1482	27.0517	26.2337	26.4178	26.7092	26.6953	26.5544	26.4404	26.2811
Glyma.20G150900.1	S242	1	Control	StatsSet	28.2746	27.4897	27.3521	27.5365	27.016	27.0247	26.9883	27.1968	27.2088	26.6805	27.6891	9.26e-07	5.3e-07	28.8397	28.3217	27.7074	28.2295	27.843	26.8808	27.4948	27.74	27.5157	26.9967	27.3971	27.4989	27.342	27.3466	27.4955	27.9617	27.0209	26.9938	26.8356	27.2136	27.1979	26.8538	26.8867	27.1604	27.187	26.5064	27.0798	27.1803	27.243	27.0327	27.1711	27.3403
Glyma.20G166200.1	S687	1	Cold	StatsSet	24.9984	24.9142	25.2319	25.1459	24.9243	24.9368	24.7188	24.6673	24.7305	24.8728	25.1577	3.29e-06	1.71e-06	25.9436	25.8091	25.0409	23.2	25.0947	25.1659	24.7127	24.6836	26.0198	25.1015	25.1265	24.6799	25.8297	25.1244	25.021	24.6087	26.0722	24.414	25.0975	24.1135	25.1951	25.0719	25.6733	23.807	24.064	25.2934	24.8214	24.6966	23.4721	25.1883	25.045	24.9636
Glyma.20G166200.1	S687	1	Control	StatsSet	25.7421	25.9383	25.6494	25.6584	25.8048	25.2636	25.1179	25.3241	25.0103	25.6306	25.2281	3.29e-06	1.71e-06	26.1292	25.6197	25.9108	25.3086	26.3092	25.7031	25.9464	25.7947	25.3346	25.8281	25.6082	25.8267	26.2425	25.3932	25.6045	25.3932	25.9976	26.0592	26.2283	24.9342	25.6726	25.4331	25.2628	24.6858	25.9596	25.4951	24.7414	24.2753	25.7522	25.6421	25.7839	24.1184
Glyma.20G177200.1	S50	1	Cold	StatsSet	23.5116	24.3374	23.5913	23.8333	23.5317	23.3806	23.6274	23.2195	23.5376	23.1857	23.9931	6.41e-16	2.17e-15	22.8124	23.6516	23.7865	23.796	23.5504	24.2122	25.1183	24.4686	21.9267	23.5626	24.0283	24.8476	23.2858	23.7527	24.3112	23.9837	22.8608	23.7981	23.8277	23.6401	23.5437	23.4185	23.2217	23.3385	23.6732	23.5215	23.4544	23.8604	22.7105	23.551	22.9772	23.6395
Glyma.20G177200.1	S50	1	Control	StatsSet	23.0988	22.8207	22.8779	22.4615	22.3858	22.6882	22.5757	22.4519	22.5361	22.6549	22.9846	6.41e-16	2.17e-15	23.0111	23.0086	22.7592	23.6164	22.4676	22.8528	23.0483	22.914	22.2596	22.7657	23.3272	23.159	22.2681	22.4675	22.1792	22.9313	22.2831	22.3648	21.9118	22.9834	22.0534	22.7457	22.5606	23.3932	22.3204	22.6217	22.8759	22.4847	22.6745	22.1869	22.3954	22.5509
Glyma.20G179700.1	S12	1	Cold	StatsSet	27.9658	28.1994	28.1844	28.2763	28.0547	28.3106	28.3035	28.3364	28.363	28.6256	28.0946	0.000879002	0.000286787	26.537	27.9441	27.9255	29.4564	26.528	28.5526	28.2975	29.4194	26.1787	28.6091	28.2874	29.6623	26.7066	29.2618	27.5242	29.6125	26.253	28.2251	28.2832	29.4576	26.9085	29.222	27.5656	29.5463	26.8122	28.4472	28.2955	29.6591	27.5159	28.7165	27.7322	29.3808
Glyma.20G179700.1	S12	1	Control	StatsSet	28.0759	27.7596	28.1835	27.6756	27.3758	27.9825	27.9069	27.7417	27.9837	27.8363	27.8654	0.000879002	0.000286787	26.9554	28.8369	28.6016	27.9097	27.331	27.8152	28.1656	27.7264	27.7804	28.1827	28.5304	28.2406	26.4952	28.6557	28.0846	27.4667	26.6717	27.5106	27.4495	27.8715	26.9451	28.1534	28.347	28.4846	26.9126	27.6527	28.7471	28.3152	26.8177	28.2197	27.4935	28.4357
Glyma.20G190000.1	S382	1	Cold	StatsSet	23.7217	23.3281	23.1742	23.3115	23.5217	23.4841	23.5685	23.6362	23.3709	23.4782	23.381	1.94e-19	1.87e-18	24.1729	23.245	23.7472	0	24.0197	23.1755	22.789	0	24.0804	22.7341	23.2429	22.6395	23.9363	22.9214	23.0768	0	24.5072	22.7307	23.3272	0	24.0789	23.0461	23.3272	0	24.334	22.9826	23.3889	0	24.1115	23.4928	23.3042	0
Glyma.20G190000.1	S382	1	Control	StatsSet	24.507	24.5229	24.5325	24.5914	24.6972	24.3686	24.3569	24.3994	24.5037	24.2679	24.4132	1.94e-19	1.87e-18	24.8817	24.1903	24.4388	24.517	24.8972	24.26	23.69	25.2443	24.7342	24.2952	23.8233	25.2775	24.6752	24.1353	24.5187	25.0364	24.8762	24.3956	24.7983	24.7189	24.7548	23.807	23.981	24.9317	24.8445	24.0971	24.1147	24.3712	24.655	24.2904	24.3492	24.303
Glyma.20G191700.1	S21	2	Cold	StatsSet	25.2005	25.7098	25.5632	25.2673	26.0122	25.878	25.956	25.7821	24.4702	26.1993	25.3597	0.184364	0.0409584	25.4996	24.4997	25.6022	0	26.8399	25.6081	25.5293	24.8618	25.959	24.8971	25.8334	0	25.7745	24.7406	25.2868	0	26.5538	25.8329	25.359	26.3031	26.511	25.6453	25.1141	26.2414	26.6206	25.5549	25.6923	0	26.7688	25.8541	24.7233	0
Glyma.20G191700.1	S21	2	Control	StatsSet	24.9368	24.8819	25.4729	25.735	24.3291	25.7307	25.6833	25.4013	25.7675	24.7983	26.0282	0.184364	0.0409584	25.0078	24.1666	24.1895	26.3831	24.9506	24.2957	23.4526	26.8288	0	24.0378	25.2311	27.1497	24.9102	25.617	25.7567	26.6561	25.223	23.459	21.6022	27.0322	25.6382	25.6832	24.8923	26.709	24.9019	24.7136	26.4054	26.7125	25.3422	25.2196	24.705	26.3384
Glyma.20G191700.1	S28	2	Cold	StatsSet	25.2005	25.7098	25.5632	25.2673	26.0122	25.878	25.956	25.7821	24.4702	26.1993	25.3597	0.184364	0.0409584	25.4996	24.4997	25.6022	0	26.8399	25.6081	25.5293	24.8618	25.959	24.8971	25.8334	0	25.7745	24.7406	25.2868	0	26.5538	25.8329	25.359	26.3031	26.511	25.6453	25.1141	26.2414	26.6206	25.5549	25.6923	0	26.7688	25.8541	24.7233	0
Glyma.20G191700.1	S28	2	Control	StatsSet	24.9368	24.8819	25.4729	25.735	24.3291	25.7307	25.6833	25.4013	25.7675	24.7983	26.0282	0.184364	0.0409584	25.0078	24.1666	24.1895	26.3831	24.9506	24.2957	23.4526	26.8288	0	24.0378	25.2311	27.1497	24.9102	25.617	25.7567	26.6561	25.223	23.459	21.6022	27.0322	25.6382	25.6832	24.8923	26.709	24.9019	24.7136	26.4054	26.7125	25.3422	25.2196	24.705	26.3384
Glyma.20G199100.1	S214	1	Cold	StatsSet	25.3911	25.0723	25.4366	25.2121	25.4091	25.0737	25.81	25.2299	25.3877	25.3221	25.1409	7.5e-06	3.64e-06	25.3179	25.6433	25.2121	0	24.1514	25.3448	25.7206	0	24.8082	25.3954	26.1062	0	24.5435	25.6668	25.4261	0	24.6668	26.0082	25.5525	0	24.3887	25.5454	25.2871	0	25.5999	25.6082	26.2219	0	24.5154	25.822	25.3523	0
Glyma.20G199100.1	S214	1	Control	StatsSet	24.759	24.6702	24.3725	24.7713	24.0272	24.8083	23.6906	24.8704	25.2768	24.897	24.6572	7.5e-06	3.64e-06	24.1862	24.9813	25.1094	0	24.5213	24.513	24.9763	0	24.0227	24.3545	24.7404	0	24.7384	24.6527	24.923	0	24.2571	24.2672	23.5575	0	23.934	25.0777	25.4132	0	24.1865	24.9232	21.9621	0	24.276	24.9422	25.393	0
Glyma.20G229900.1	S536	1	Cold	StatsSet	26.4103	25.9119	26.0251	26.275	26.2917	26.2402	26.4114	26.2979	26.2545	26.0549	25.9899	0.471282	0.0970392	26.1177	26.437	26.6761	0	26.0856	25.9562	25.6938	0	26.1275	25.7812	26.1666	0	26.7098	25.9058	26.2095	0	26.938	25.694	26.2432	0	26.3457	25.8625	26.5123	0	26.666	26.0416	26.5265	0	26.6035	25.7654	26.5247	0
Glyma.20G229900.1	S536	1	Control	StatsSet	26.126	26.135	26.2006	26.4655	26.2196	26.4816	26.1162	26.0571	26.346	26.3465	26.2466	0.471282	0.0970392	26.5125	25.7747	26.0908	0	26.1966	25.9477	26.2608	0	26.0091	25.9601	26.6326	0	26.2902	26.2789	26.8272	0	26.0238	26.234	26.401	0	26.3105	26.8971	26.2372	0	26.2007	25.5697	26.5782	0	26.3709	25.684	26.1164	0
Glyma.20G238400.1	S329	1	Cold	StatsSet	25.62	25.7503	25.6258	25.8763	25.6202	25.9031	25.8153	25.7766	26.0813	26.0222	25.6531	5.2e-05	2.11e-05	25.6622	25.7778	25.3022	25.7379	25.8789	25.4581	25.5311	26.1332	25.7886	25.3628	25.5975	25.7544	25.9429	25.6033	25.8852	26.0737	25.5432	25.8371	25.2833	25.817	26.0531	25.7593	25.4642	26.336	26.1578	25.769	25.4894	25.8448	25.8066	25.6991	25.5041	26.0966
Glyma.20G238400.1	S329	1	Control	StatsSet	25.5937	25.5632	25.5996	25.4517	25.6044	25.5111	25.5972	25.5703	25.6336	25.6161	25.5078	5.2e-05	2.11e-05	25.399	25.2002	25.6798	26.0959	25.8505	25.3447	25.4132	25.6444	25.2182	25.2875	25.7445	26.1482	25.5869	25.5901	25.3183	25.3117	25.6604	25.6497	24.9202	26.1875	25.0699	25.4504	25.4079	26.1162	25.2588	25.3254	25.8266	25.978	25.4656	25.7187	25.2095	25.8872
Glyma.20G238400.1	S680	1	Cold	StatsSet	23.7833	25.2656	24.8996	25.1152	25.0423	24.9263	25.152	24.7339	25.1905	24.6273	24.2815	0.0574001	0.0143578	24.8319	24.8574	0	21.6607	25.135	24.9073	25.588	25.4319	24.3852	24.6476	25.0508	25.5146	25.1637	24.4112	25.6802	25.2057	24.8947	25.6387	25.05	24.5858	25.417	24.472	24.6664	25.1499	25.4009	24.7362	25.3187	0	25.3588	24.8774	24.604	24.0954
Glyma.20G238400.1	S680	1	Control	StatsSet	24.4555	24.8363	24.8239	24.2012	24.4085	24.6996	24.4236	24.2582	24.6589	24.6825	24.6311	0.0574001	0.0143578	24.0419	24.2992	24.678	24.8028	24.8414	24.7161	24.8449	24.9429	24.2149	25.0658	24.815	25.1999	24.6011	23.9724	24.3036	23.9277	24.7148	24.2779	23.9253	24.7159	24.9069	24.408	24.627	24.8565	24.8924	24.6499	24.0335	24.1185	23.8979	24.3858	24.7998	23.9492
Glyma.20G244400.1	S189	1	Cold	StatsSet	24.2746	24.2785	24.4066	24.3183	24.2633	24.0981	24.1689	24.2955	24.3964	24.3625	23.9808	0.0861184	0.0206981	23.968	23.8842	23.9086	25.3374	23.9551	23.8684	24.3056	24.9851	24.0222	24.2095	24.1685	25.2262	23.6772	24.1158	23.7742	25.7059	24.5616	23.9993	23.6921	24.8002	23.6234	24.1488	23.5678	25.0523	24.24	24.0774	23.6899	24.6682	24.3671	24.0802	24.2177	24.517
Glyma.20G244400.1	S189	1	Control	StatsSet	24.2749	24.2376	24.6095	24.3016	24.2741	24.5134	24.6169	24.3206	24.5258	24.4266	24.5102	0.0861184	0.0206981	24.0739	24.7156	24.1897	24.1204	23.5664	24.4218	25.1315	23.8308	24.5435	24.2168	24.8651	24.8126	23.7487	24.6119	24.3604	24.4854	24.3163	24.3079	24.1838	24.2884	23.9038	24.6088	24.8011	24.7401	24.1105	24.4012	25.2718	24.6841	24.221	24.3936	24.358	24.3097
Glyma.20G248100.1	S26	1	Cold	StatsSet	26.5731	26.1636	26.4048	26.3583	25.615	26.0947	26.2308	26.0938	26.0477	25.4513	26.9793	2.92e-15	8.72e-15	25.6777	27.1931	26.9871	26.4345	24.3993	26.9054	26.6971	26.6525	24.4621	27.5948	26.908	26.6544	24.8247	27.2325	26.9465	26.4296	23.7327	26.8409	26.0736	25.8129	24.7655	27.0633	26.7031	25.8468	24.2872	26.4359	27.2195	26.9806	23.9463	26.4604	26.8578	27.1106
Glyma.20G248100.1	S26	1	Control	StatsSet	25.101	25.1342	24.6954	24.5214	24.7247	24.8348	24.6785	24.8627	24.9122	25.3294	24.8501	2.92e-15	8.72e-15	24.0079	25.7334	25.7759	24.8869	24.2066	25.3973	25.8408	25.0921	22.3923	25.6142	25.9052	24.87	23.9114	25.2959	24.5424	24.336	24.0086	25.7984	24.8853	24.2067	23.7824	25.3672	25.6461	24.5435	23.9821	25.9888	25.0609	23.6823	24.5187	25.3774	25.2025	24.3523
Glyma.U012400.1	T44	1	Cold	StatsSet	24.8748	24.9449	25.1599	24.9688	25.37	25.0164	25.1239	25.0712	25.0634	24.8459	24.9293	0.137042	0.0314808	24.9618	24.7021	24.8927	24.9425	25.1199	25.1047	24.8206	24.7345	25.2895	24.7989	25.0184	25.5329	24.7432	24.7819	25.006	25.3441	25.6573	25.2618	25.1022	25.4589	24.7522	25.101	24.9991	25.2133	25.5761	25.235	25.3051	24.3795	25.2778	25.2743	25.0162	24.7163
Glyma.U012400.1	T44	1	Control	StatsSet	24.8805	25.0676	25.3617	24.9124	24.3707	24.8569	24.24	24.6932	24.8668	24.5733	25.4483	0.137042	0.0314808	24.4905	24.5853	24.659	25.7873	24.7906	24.6112	0	25.8011	25.0037	24.6042	25.3674	26.4715	24.738	24.9026	24.6127	25.3961	24.7155	24.2445	23.0035	25.5191	24.6712	25.3875	24.2919	25.0769	21.4368	24.8715	25.7371	24.9146	24.456	25.105	24.4585	24.7531
[truncated: 13 more columns]
