# Supplementary material for: Functional annotation of proteins for signaling network inference in non-model species
Source: Research Square preprint supplement (doi:10.21203/rs.3.rs-2201240/v1), 2022-11-11
Supplement: Supplementary file 3 [file 8535b12bb5cfee155d382015.xlsx]

## Sheet: Sheet 1
Supplementary Table 10 - Phylogenetic analysis of Arabidopsis thaliana, Glycine max (soybean), Triticum aestivum (wheat), Zea mays (maize), Sorghum bicolor (sorghum), and Oryza sativa (rice). The predicted phosphatases from PF-NET and HMMER and their orthogroup are listed.
Phosphatase	Orthogroup	Species
Zm00001eb069270	OG0008593	Z. mays
Zm00001eb340700	OG0003162	Z. mays
Zm00001eb282770	OG0003162	Z. mays
Zm00001eb240190	OG0001307	Z. mays
Zm00001eb205250	OG0001307	Z. mays
Zm00001eb346060	OG0003162	Z. mays
Zm00001eb385280	OG0001307	Z. mays
Zm00001eb385280	OG0029625	Z. mays
Zm00001eb061450	OG0001116	Z. mays
Zm00001eb345020	OG0001268	Z. mays
Zm00001eb277250	OG0001307	Z. mays
Zm00001eb277250	OG0030560	Z. mays
Zm00001eb048270	OG0001116	Z. mays
Zm00001eb048270	OG0025897	Z. mays
Zm00001eb297570	OG0001268	Z. mays
Zm00001eb297570	OG0021412	Z. mays
Zm00001eb005220	OG0001116	Z. mays
Zm00001eb040520	OG0000249	Z. mays
Zm00001eb094420	OG0009661	Z. mays
Zm00001eb191230	OG0000249	Z. mays
Zm00001eb271450	OG0000249	Z. mays
Zm00001eb212620	OG0001116	Z. mays
Zm00001eb421700	OG0004093	Z. mays
Zm00001eb357040	OG0000922	Z. mays
Zm00001eb035360	OG0006444	Z. mays
Zm00001eb306980	OG0002844	Z. mays
Zm00001eb273010	OG0014209	Z. mays
Zm00001eb240940	OG0012985	Z. mays
Zm00001eb360690	OG0006809	Z. mays
Zm00001eb375670	OG0000249	Z. mays
Zm00001eb259130	OG0000249	Z. mays
Zm00001eb259130	OG0025114	Z. mays
Zm00001eb374780	OG0014220	Z. mays
Zm00001eb374780	OG0030228	Z. mays
Zm00001eb011980	OG0000249	Z. mays
Zm00001eb356420	OG0006583	Z. mays
Zm00001eb048820	OG0009469	Z. mays
Zm00001eb199570	OG0005838	Z. mays
Zm00001eb160470	OG0000922	Z. mays
Zm00001eb203040	OG0012985	Z. mays
Zm00001eb239920	OG0004237	Z. mays
Zm00001eb094040	OG0007320	Z. mays
Zm00001eb344210	OG0005661	Z. mays
Zm00001eb283980	OG0004653	Z. mays
Zm00001eb319660	OG0002242	Z. mays
Zm00001eb034100	OG0005838	Z. mays
Zm00001eb393920	OG0000375	Z. mays
Zm00001eb205090	OG0004237	Z. mays
Zm00001eb158020	OG0018121	Z. mays
Zm00001eb112250	OG0016191	Z. mays
Zm00001eb215780	OG0015357	Z. mays
Zm00001eb234050	OG0000294	Z. mays
Zm00001eb010140	OG0000887	Z. mays
Zm00001eb144980	OG0010791	Z. mays
Zm00001eb013450	OG0005055	Z. mays
Zm00001eb396970	OG0005055	Z. mays
Zm00001eb297600	OG0009967	Z. mays
Zm00001eb088070	OG0013298	Z. mays
Zm00001eb003020	OG0000375	Z. mays
Zm00001eb086200	OG0000241	Z. mays
Zm00001eb086200	OG0029478	Z. mays
Zm00001eb359460	OG0018121	Z. mays
Zm00001eb084510	OG0004093	Z. mays
Zm00001eb012350	OG0011533	Z. mays
Zm00001eb419870	OG0013298	Z. mays
Zm00001eb358340	OG0016267	Z. mays
Zm00001eb214320	OG0003261	Z. mays
Zm00001eb064450	OG0004690	Z. mays
Zm00001eb402720	OG0000375	Z. mays
Zm00001eb354380	OG0013936	Z. mays
Zm00001eb374920	OG0002561	Z. mays
Zm00001eb324540	OG0003393	Z. mays
Zm00001eb218630	OG0002062	Z. mays
Zm00001eb003010	OG0000375	Z. mays
Zm00001eb148130	OG0005353	Z. mays
Zm00001eb417220	OG0004157	Z. mays
Zm00001eb204210	OG0001268	Z. mays
Zm00001eb204210	OG0022347	Z. mays
Zm00001eb309620	OG0010403	Z. mays
Zm00001eb309620	OG0037472	Z. mays
Zm00001eb367840	OG0005353	Z. mays
Zm00001eb285830	OG0001707	Z. mays
Zm00001eb357000	OG0015899	Z. mays
Zm00001eb297300	OG0000922	Z. mays
Zm00001eb345270	OG0000922	Z. mays
Zm00001eb274970	OG0000294	Z. mays
Zm00001eb406620	OG0006201	Z. mays
Zm00001eb421860	OG0003169	Z. mays
Zm00001eb058130	OG0003261	Z. mays
Zm00001eb388790	OG0000294	Z. mays
Zm00001eb388790	OG0037398	Z. mays
Zm00001eb072840	OG0004220	Z. mays
Zm00001eb294200	OG0006583	Z. mays
Zm00001eb181140	OG0021642	Z. mays
Zm00001eb221100	OG0014262	Z. mays
Zm00001eb201680	OG0013244	Z. mays
Zm00001eb425880	OG0014581	Z. mays
Zm00001eb320490	OG0000294	Z. mays
Zm00001eb238250	OG0001268	Z. mays
Zm00001eb238250	OG0022347	Z. mays
Zm00001eb018090	OG0005311	Z. mays
Zm00001eb182690	OG0012993	Z. mays
Zm00001eb258010	OG0002561	Z. mays
Zm00001eb050340	OG0002062	Z. mays
Zm00001eb244550	OG0012993	Z. mays
Zm00001eb151650	OG0006007	Z. mays
Zm00001eb003000	OG0003205	Z. mays
Zm00001eb031970	OG0002062	Z. mays
Zm00001eb250950	OG0004220	Z. mays
Zm00001eb012040	OG0015821	Z. mays
Zm00001eb091350	OG0018140	Z. mays
Zm00001eb392700	OG0003933	Z. mays
Zm00001eb010130	OG0000887	Z. mays
Zm00001eb062680	OG0010340	Z. mays
Zm00001eb400570	OG0019012	Z. mays
Zm00001eb387030	OG0012684	Z. mays
Zm00001eb105030	OG0022189	Z. mays
Zm00001eb081430	OG0008779	Z. mays
Zm00001eb385910	OG0009297	Z. mays
Zm00001eb168010	OG0016191	Z. mays
Zm00001eb332150	OG0004157	Z. mays
Zm00001eb421880	OG0005420	Z. mays
Zm00001eb423600	OG0008779	Z. mays
Zm00001eb110450	OG0007052	Z. mays
Zm00001eb063490	OG0000375	Z. mays
Zm00001eb132080	OG0009188	Z. mays
Zm00001eb272240	OG0003205	Z. mays
Zm00001eb398210	OG0014519	Z. mays
Zm00001eb228190	OG0003205	Z. mays
Zm00001eb098220	OG0010677	Z. mays
Zm00001eb202100	OG0005420	Z. mays
Zm00001eb162530	OG0008391	Z. mays
Zm00001eb130450	OG0002872	Z. mays
Zm00001eb071240	OG0013093	Z. mays
Zm00001eb430620	OG0013093	Z. mays
Zm00001eb393810	OG0004020	Z. mays
Zm00001eb048700	OG0007743	Z. mays
Zm00001eb309920	OG0010677	Z. mays
Zm00001eb029530	OG0000241	Z. mays
Zm00001eb410860	OG0009967	Z. mays
Zm00001eb392730	OG0009138	Z. mays
Zm00001eb394120	OG0005311	Z. mays
Zm00001eb355760	OG0021362	Z. mays
Zm00001eb044870	OG0014262	Z. mays
Zm00001eb342010	OG0006081	Z. mays
Zm00001eb208010	OG0001556	Z. mays
Zm00001eb413940	OG0013093	Z. mays
Zm00001eb111860	OG0002319	Z. mays
Zm00001eb322340	OG0003530	Z. mays
Zm00001eb396460	OG0002319	Z. mays
Zm00001eb396460	OG0037711	Z. mays
Zm00001eb085600	OG0013392	Z. mays
Zm00001eb400210	OG0000241	Z. mays
Zm00001eb355580	OG0007180	Z. mays
Zm00001eb329360	OG0007052	Z. mays
Zm00001eb169080	OG0015037	Z. mays
Zm00001eb138930	OG0002118	Z. mays
Zm00001eb168410	OG0002796	Z. mays
Zm00001eb388780	OG0000294	Z. mays
Zm00001eb331410	OG0002319	Z. mays
Zm00001eb376750	OG0007461	Z. mays
Zm00001eb376750	OG0034365	Z. mays
Zm00001eb096290	OG0006248	Z. mays
Zm00001eb141530	OG0009422	Z. mays
Zm00001eb067610	OG0001556	Z. mays
Zm00001eb067610	OG0036072	Z. mays
Zm00001eb022330	OG0004020	Z. mays
Zm00001eb008960	OG0000059	Z. mays
Zm00001eb051840	OG0002792	Z. mays
Zm00001eb431460	OG0003459	Z. mays
Zm00001eb105950	OG0021778	Z. mays
Zm00001eb340730	OG0002872	Z. mays
Zm00001eb019240	OG0003933	Z. mays
Zm00001eb315010	OG0019600	Z. mays
Zm00001eb000620	OG0001537	Z. mays
Zm00001eb369470	OG0011391	Z. mays
Zm00001eb211690	OG0010340	Z. mays
Zm00001eb153800	OG0018779	Z. mays
Zm00001eb203570	OG0009278	Z. mays
Zm00001eb293560	OG0027465	Z. mays
Zm00001eb266320	OG0007180	Z. mays
Zm00001eb095260	OG0006370	Z. mays
Zm00001eb369460	OG0011391	Z. mays
Zm00001eb176760	OG0007230	Z. mays
Zm00001eb391070	OG0012208	Z. mays
Zm00001eb090670	OG0002796	Z. mays
Zm00001eb303240	OG0006370	Z. mays
Zm00001eb163970	OG0010833	Z. mays
Zm00001eb298290	OG0006248	Z. mays
Zm00001eb093380	OG0010009	Z. mays
Zm00001eb252940	OG0003990	Z. mays
Zm00001eb107130	OG0003393	Z. mays
Zm00001eb095500	OG0002978	Z. mays
Zm00001eb095500	OG0020860	Z. mays
Zm00001eb251160	OG0010699	Z. mays
Zm00001eb036930	OG0000241	Z. mays
Zm00001eb281200	OG0003990	Z. mays
Zm00001eb366890	OG0012841	Z. mays
Zm00001eb256300	OG0018967	Z. mays
Zm00001eb193370	OG0018967	Z. mays
Zm00001eb147230	OG0012841	Z. mays
Zm00001eb118200	OG0013838	Z. mays
Zm00001eb039660	OG0005350	Z. mays
Zm00001eb297210	OG0026529	Z. mays
Zm00001eb344180	OG0004237	Z. mays
Zm00001eb091310	OG0000059	Z. mays
Zm00001eb298570	OG0010379	Z. mays
Zm00001eb012370	OG0000059	Z. mays
Zm00001eb197030	OG0005752	Z. mays
Zm00001eb197030	OG0022255	Z. mays
Zm00001eb392360	OG0025417	Z. mays
Zm00001eb092690	OG0005752	Z. mays
Zm00001eb092690	OG0022255	Z. mays
Zm00001eb278930	OG0002978	Z. mays
Zm00001eb028320	OG0000059	Z. mays
Zm00001eb373490	OG0002978	Z. mays
Zm00001eb300200	OG0026529	Z. mays
Zm00001eb264360	OG0027841	Z. mays
Zm00001eb025970	OG0020186	Z. mays
Zm00001eb385400	OG0020186	Z. mays
TraesCS1D02G104400	OG0003162	T. aestivum
TraesCS1A02G095500	OG0003162	T. aestivum
TraesCS1B02G128100	OG0003162	T. aestivum
TraesCS3B02G226800	OG0003162	T. aestivum
TraesCS2A02G528700	OG0008593	T. aestivum
TraesCS2D02G531600	OG0008593	T. aestivum
TraesCS2B02G559100	OG0008593	T. aestivum
TraesCS3D02G199300	OG0003162	T. aestivum
TraesCS7B02G263500	OG0001307	T. aestivum
TraesCS5B02G173100	OG0009661	T. aestivum
TraesCS7D02G358600	OG0001307	T. aestivum
TraesCS7A02G364400	OG0001307	T. aestivum
TraesCS3A02G195500	OG0003162	T. aestivum
TraesCS5D02G465400	OG0001116	T. aestivum
TraesCS6A02G183700	OG0001307	T. aestivum
TraesCS6D02G171400	OG0001307	T. aestivum
TraesCS6B02G213200	OG0001307	T. aestivum
TraesCS5A02G176800	OG0009661	T. aestivum
TraesCS5D02G180100	OG0009661	T. aestivum
TraesCS7A02G249000	OG0006444	T. aestivum
TraesCS7B02G142300	OG0006444	T. aestivum
TraesCS6D02G103800	OG0009469	T. aestivum
TraesCS5A02G455000	OG0001116	T. aestivum
TraesCS4D02G282100	OG0001116	T. aestivum
TraesCS4B02G283300	OG0001116	T. aestivum
TraesCS7B02G137400	OG0005838	T. aestivum
TraesCS5A02G270900	OG0001116	T. aestivum
TraesCS7D02G240800	OG0005838	T. aestivum
TraesCS5B02G271300	OG0001116	T. aestivum
TraesCS6D02G181000	OG0012985	T. aestivum
TraesCS4A02G093600	OG0000249	T. aestivum
TraesCS4D02G211500	OG0000249	T. aestivum
TraesCS4B02G210800	OG0000249	T. aestivum
TraesCS6A02G404700	OG0000249	T. aestivum
TraesCS6B02G229600	OG0012985	T. aestivum
TraesCS6D02G388000	OG0000249	T. aestivum
TraesCS5B02G565000	OG0028591	T. aestivum
TraesCS1D02G380200	OG0006809	T. aestivum
TraesCS6B02G142700	OG0009469	T. aestivum
TraesCS3A02G249000	OG0006583	T. aestivum
TraesCS6A02G193100	OG0012985	T. aestivum
TraesCS3D02G230500	OG0001268	T. aestivum
TraesCS4A02G315000	OG0028591	T. aestivum
TraesCS5A02G321200	OG0002242	T. aestivum
TraesCS3B02G277900	OG0006583	T. aestivum
TraesCS3B02G252500	OG0001268	T. aestivum
TraesCS5D02G549800	OG0028591	T. aestivum
TraesCS6D02G381300	OG0000249	T. aestivum
TraesCS2B02G307000	OG0004093	T. aestivum
TraesCS6B02G436400	OG0000249	T. aestivum
TraesCS6A02G396400	OG0000249	T. aestivum
TraesCS1D02G449700	OG0000922	T. aestivum
TraesCS7D02G513700	OG0036270	T. aestivum
TraesCS3A02G261200	OG0006809	T. aestivum
TraesCS3D02G261300	OG0006809	T. aestivum
TraesCS3B02G294200	OG0006809	T. aestivum
TraesCS1B02G475700	OG0000922	T. aestivum
TraesCS7A02G422800	OG0014209	T. aestivum
TraesCS1A02G441200	OG0000922	T. aestivum
TraesCS6B02G449000	OG0000249	T. aestivum
TraesCS5D02G327900	OG0002242	T. aestivum
TraesCS7B02G025800	OG0000249	T. aestivum
TraesCS7A02G126500	OG0000249	T. aestivum
TraesCS7D02G124400	OG0000249	T. aestivum
TraesCS5B02G321700	OG0002242	T. aestivum
TraesCS3D02G212100	OG0000922	T. aestivum
TraesCS3A02G209200	OG0000922	T. aestivum
TraesCS6A02G355600	OG0001268	T. aestivum
TraesCS7B02G048800	OG0014220	T. aestivum
TraesCS6A02G357100	OG0006007	T. aestivum
TraesCS5D02G328000	OG0002242	T. aestivum
TraesCS4A02G110100	OG0005055	T. aestivum
TraesCS3D02G249000	OG0006583	T. aestivum
TraesCS3A02G482300	OG0009422	T. aestivum
TraesCS6A02G115100	OG0009469	T. aestivum
TraesCS3B02G156800	OG0004653	T. aestivum
TraesCS2D02G288400	OG0004093	T. aestivum
TraesCS3B02G240000	OG0000922	T. aestivum
TraesCS7A02G369000	OG0008593	T. aestivum
TraesCS3B02G096800	OG0024739	T. aestivum
TraesCS2D02G000300	OG0013298	T. aestivum
TraesCS2D02G172500	OG0009422	T. aestivum
TraesCS2B02G023600	OG0013298	T. aestivum
TraesCS5D02G379000	OG0002844	T. aestivum
TraesCS3B02G096600	OG0024739	T. aestivum
TraesCS2A02G290500	OG0004093	T. aestivum
TraesCS3D02G139500	OG0004653	T. aestivum
TraesCS2B02G191500	OG0009422	T. aestivum
TraesCS5A02G369700	OG0002844	T. aestivum
TraesCS2D02G290900	OG0003169	T. aestivum
TraesCS1B02G107000	OG0013936	T. aestivum
TraesCS4B02G254700	OG0019012	T. aestivum
TraesCS3A02G139200	OG0004653	T. aestivum
TraesCS5A02G129200	OG0005420	T. aestivum
TraesCS4B02G194000	OG0005055	T. aestivum
TraesCS6B02G224900	OG0001268	T. aestivum
TraesCS1D02G363500	OG0006583	T. aestivum
TraesCS7A02G241800	OG0005838	T. aestivum
TraesCS7B02G175800	OG0021887	T. aestivum
TraesCS2D02G456600	OG0004220	T. aestivum
TraesCS5D02G185900	OG0010403	T. aestivum
TraesCS2B02G185700	OG0000887	T. aestivum
TraesCS5B02G372000	OG0002844	T. aestivum
TraesCS7D02G415200	OG0014209	T. aestivum
TraesCS2A02G456300	OG0004220	T. aestivum
TraesCS5B02G127700	OG0006201	T. aestivum
TraesCS4D02G056700	OG0015357	T. aestivum
TraesCS5B02G321600	OG0002242	T. aestivum
TraesCS4B02G381900	OG0011533	T. aestivum
TraesCS4A02G258100	OG0015357	T. aestivum
TraesCS5A02G505300	OG0000375	T. aestivum
TraesCS4B02G230000	OG0000887	T. aestivum
TraesCS4D02G194900	OG0005055	T. aestivum
TraesCS5B02G371900	OG0002844	T. aestivum
TraesCS6A02G199000	OG0012993	T. aestivum
TraesCS4D02G331100	OG0000375	T. aestivum
TraesCS3D02G477500	OG0009422	T. aestivum
TraesCS6D02G178400	OG0004237	T. aestivum
TraesCS3A02G400200	OG0010791	T. aestivum
TraesCS5B02G179300	OG0010403	T. aestivum
TraesCS4D02G357800	OG0011533	T. aestivum
TraesCS3D02G394400	OG0010791	T. aestivum
TraesCS5A02G369600	OG0002844	T. aestivum
TraesCS7B02G323200	OG0014209	T. aestivum
TraesCS4D02G333500	OG0017825	T. aestivum
TraesCS1A02G411200	OG0005661	T. aestivum
TraesCS3B02G433200	OG0010791	T. aestivum
TraesCS3A02G237800	OG0005661	T. aestivum
TraesCS6D02G188300	OG0001268	T. aestivum
TraesCS4B02G056400	OG0015357	T. aestivum
TraesCS1D02G175300	OG0014262	T. aestivum
TraesCS6A02G202800	OG0001268	T. aestivum
TraesCS5D02G379100	OG0002844	T. aestivum
TraesCS4D02G332800	OG0017825	T. aestivum
TraesCS2A02G000400	OG0013298	T. aestivum
TraesCS5B02G400500	OG0009138	T. aestivum
TraesCS5D02G510100	OG0000375	T. aestivum
TraesCS5A02G321000	OG0002242	T. aestivum
TraesCS5A02G181600	OG0010403	T. aestivum
TraesCS2A02G093700	OG0002319	T. aestivum
TraesCS2B02G478400	OG0004220	T. aestivum
TraesCS3B02G096100	OG0024739	T. aestivum
TraesCS1A02G228000	OG0001707	T. aestivum
TraesCS1D02G230000	OG0001707	T. aestivum
TraesCS5A02G507200	OG0017825	T. aestivum
TraesCS5A02G507100	OG0017825	T. aestivum
TraesCS7A02G048200	OG0020170	T. aestivum
TraesCS4A02G443500	OG0020170	T. aestivum
TraesCS2A02G165200	OG0009422	T. aestivum
TraesCS5A02G150700	OG0007320	T. aestivum
TraesCS5A02G507000	OG0017825	T. aestivum
TraesCS6B02G182800	OG0007743	T. aestivum
TraesCS7A02G532000	OG0036270	T. aestivum
TraesCS7A02G504800	OG0000294	T. aestivum
TraesCS3B02G528700	OG0009422	T. aestivum
TraesCS4A02G443400	OG0020170	T. aestivum
TraesCS5A02G479600	OG0010340	T. aestivum
TraesCS7A02G278400	OG0021887	T. aestivum
TraesCS4B02G184100	OG0028584	T. aestivum
TraesCS2D02G362300	OG0013244	T. aestivum
TraesCS2A02G087100	OG0029044	T. aestivum
TraesCS1B02G375100	OG0006583	T. aestivum
TraesCS1B02G242400	OG0001707	T. aestivum
TraesCS5D02G493200	OG0010340	T. aestivum
TraesCS2B02G382900	OG0013244	T. aestivum
TraesCS7D02G042600	OG0020170	T. aestivum
TraesCS1A02G358600	OG0006583	T. aestivum
TraesCS5A02G395700	OG0009138	T. aestivum
TraesCS5D02G136600	OG0006201	T. aestivum
TraesCS1A02G228200	OG0001707	T. aestivum
TraesCS1B02G441400	OG0005661	T. aestivum
TraesCS5D02G155800	OG0007320	T. aestivum
TraesCS3B02G266200	OG0005661	T. aestivum
TraesCS7D02G328200	OG0021459	T. aestivum
TraesCS1D02G205700	OG0004020	T. aestivum
TraesCS5B02G285400	OG0000241	T. aestivum
TraesCS4A02G363400	OG0000375	T. aestivum
TraesCS5B02G149300	OG0007320	T. aestivum
TraesCS2A02G293300	OG0003169	T. aestivum
TraesCS4D02G185200	OG0028584	T. aestivum
TraesCS4D02G159700	OG0021642	T. aestivum
TraesCS1A02G033700	OG0021362	T. aestivum
TraesCS2A02G364400	OG0013244	T. aestivum
TraesCS1A02G202300	OG0004020	T. aestivum
TraesCS5B02G127800	OG0005420	T. aestivum
TraesCS5A02G072500	OG0003261	T. aestivum
TraesCS1D02G419000	OG0005661	T. aestivum
TraesCS3A02G320100	OG0006007	T. aestivum
TraesCS7B02G259500	OG0008593	T. aestivum
TraesCS6B02G216900	OG0004237	T. aestivum
TraesCS2D02G273100	OG0015899	T. aestivum
TraesCS5B02G492700	OG0010340	T. aestivum
TraesCS5B02G362300	OG0000294	T. aestivum
TraesCS7B02G232300	OG0021459	T. aestivum
TraesCS1D02G208600	OG0000375	T. aestivum
TraesCS7D02G507900	OG0012684	T. aestivum
TraesCS3A02G081200	OG0024739	T. aestivum
TraesCS1B02G182100	OG0014262	T. aestivum
TraesCS7D02G147800	OG0014220	T. aestivum
TraesCS1B02G218900	OG0000375	T. aestivum
TraesCS5D02G136700	OG0005420	T. aestivum
TraesCS2B02G101800	OG0029044	T. aestivum
TraesCS4A02G086800	OG0014519	T. aestivum
TraesCS5A02G286100	OG0000241	T. aestivum
TraesCS7A02G350600	OG0021459	T. aestivum
TraesCS5A02G129100	OG0006201	T. aestivum
TraesCS7D02G278000	OG0021887	T. aestivum
TraesCS5D02G136500	OG0006201	T. aestivum
TraesCS6B02G398500	OG0002561	T. aestivum
TraesCS4A02G120800	OG0028584	T. aestivum
TraesCS5D02G405000	OG0009138	T. aestivum
TraesCS5D02G038500	OG0002062	T. aestivum
TraesCS2D02G084400	OG0029044	T. aestivum
TraesCS7B02G256300	OG0009297	T. aestivum
TraesCS5B02G321500	OG0002242	T. aestivum
TraesCS7D02G351600	OG0009297	T. aestivum
TraesCS2A02G506000	OG0029571	T. aestivum
TraesCS2B02G234600	OG0002118	T. aestivum
TraesCS5D02G383300	OG0002062	T. aestivum
TraesCS7D02G042300	OG0020170	T. aestivum
TraesCS7A02G517900	OG0012684	T. aestivum
TraesCS6A02G363900	OG0002561	T. aestivum
TraesCS1B02G216500	OG0004020	T. aestivum
TraesCS3D02G153200	OG0020121	T. aestivum
TraesCS4B02G337500	OG0017825	T. aestivum
TraesCS4D02G231400	OG0000887	T. aestivum
TraesCS5B02G510000	OG0000375	T. aestivum
TraesCS1A02G205300	OG0000375	T. aestivum
TraesCS4B02G162100	OG0021642	T. aestivum
TraesCS2B02G291800	OG0015899	T. aestivum
TraesCS5D02G327800	OG0002242	T. aestivum
TraesCS7B02G045100	OG0002561	T. aestivum
TraesCS1D02G229700	OG0001707	T. aestivum
TraesCS5D02G085200	OG0003261	T. aestivum
TraesCS2D02G167200	OG0000887	T. aestivum
TraesCS6A02G154800	OG0007743	T. aestivum
TraesCS5B02G375800	OG0002062	T. aestivum
TraesCS4D02G218000	OG0014519	T. aestivum
TraesCS2B02G383000	OG0013244	T. aestivum
TraesCS6D02G184300	OG0012993	T. aestivum
TraesCS7D02G524700	OG0003205	T. aestivum
TraesCS4B02G088700	OG0016191	T. aestivum
TraesCS4A02G073800	OG0000887	T. aestivum
TraesCS5D02G293500	OG0029478	T. aestivum
TraesCS7B02G434100	OG0012684	T. aestivum
TraesCS6D02G144700	OG0007743	T. aestivum
TraesCS6D02G337900	OG0001268	T. aestivum
TraesCS2B02G310500	OG0005420	T. aestivum
TraesCS4B02G217600	OG0014519	T. aestivum
TraesCS2A02G274100	OG0015899	T. aestivum
TraesCS4D02G087200	OG0016191	T. aestivum
TraesCS7B02G455500	OG0003205	T. aestivum
TraesCS2B02G534400	OG0029571	T. aestivum
TraesCS5A02G547900	OG0011533	T. aestivum
TraesCS5B02G078500	OG0003261	T. aestivum
TraesCS6B02G220000	OG0012993	T. aestivum
TraesCS3D02G238000	OG0005661	T. aestivum
TraesCS1D02G229600	OG0001707	T. aestivum
TraesCS6D02G137200	OG0000294	T. aestivum
TraesCS4A02G226300	OG0016191	T. aestivum
TraesCS5D02G369200	OG0000294	T. aestivum
TraesCS3A02G202700	OG0008391	T. aestivum
TraesCS2B02G229000	OG0003393	T. aestivum
TraesCS6A02G119900	OG0036309	T. aestivum
TraesCS4A02G050000	OG0019012	T. aestivum
TraesCS2D02G214200	OG0003393	T. aestivum
TraesCS2D02G228700	OG0021778	T. aestivum
TraesCS7A02G537000	OG0003205	T. aestivum
TraesCS6D02G339100	OG0024345	T. aestivum
TraesCS5B02G029100	OG0002062	T. aestivum
TraesCS5A02G321100	OG0002242	T. aestivum
TraesCS3D02G177900	OG0004690	T. aestivum
TraesCS6D02G109800	OG0036309	T. aestivum
TraesCS3D02G206300	OG0008391	T. aestivum
TraesCS1B02G242300	OG0001707	T. aestivum
TraesCS5A02G373900	OG0002062	T. aestivum
TraesCS7D02G144400	OG0002561	T. aestivum
TraesCSU02G068800	OG0003933	T. aestivum
TraesCS7A02G143200	OG0002561	T. aestivum
TraesCS5D02G408500	OG0003261	T. aestivum
TraesCS5A02G488300	OG0029457	T. aestivum
TraesCS1D02G079600	OG0004157	T. aestivum
TraesCS2B02G309600	OG0003169	T. aestivum
TraesCS5A02G030300	OG0002062	T. aestivum
TraesCS5A02G359900	OG0000294	T. aestivum
TraesCS2D02G315100	OG0008779	T. aestivum
TraesCS3B02G394600	OG0005353	T. aestivum
TraesCS6A02G187700	OG0004237	T. aestivum
TraesCS3B02G604000	OG0000375	T. aestivum
TraesCS3B02G226900	OG0009188	T. aestivum
TraesCS5A02G076600	OG0004157	T. aestivum
TraesCS2A02G317200	OG0008779	T. aestivum
TraesCS5A02G398900	OG0003261	T. aestivum
TraesCS2B02G166100	OG0007052	T. aestivum
TraesCS4A02G094300	OG0015821	T. aestivum
TraesCS5B02G404000	OG0003261	T. aestivum
TraesCS2D02G291800	OG0005420	T. aestivum
TraesCS2A02G294200	OG0005420	T. aestivum
TraesCS2D02G232400	OG0003530	T. aestivum
TraesCS2D02G144500	OG0007052	T. aestivum
TraesCS2D02G506800	OG0029571	T. aestivum
TraesCS2A02G201900	OG0003393	T. aestivum
TraesCS2A02G233100	OG0003530	T. aestivum
TraesCS2B02G250100	OG0003530	T. aestivum
TraesCS2A02G222700	OG0021778	T. aestivum
TraesCS3B02G234200	OG0008391	T. aestivum
TraesCS4D02G353800	OG0001537	T. aestivum
TraesCS4D02G254500	OG0019012	T. aestivum
TraesCS3A02G538500	OG0000375	T. aestivum
TraesCS4D02G160500	OG0003933	T. aestivum
TraesCS2D02G264600	OG0006248	T. aestivum
TraesCS5B02G502100	OG0029457	T. aestivum
TraesCS2A02G258900	OG0006248	T. aestivum
TraesCS2A02G141100	OG0007052	T. aestivum
TraesCS2B02G248200	OG0021778	T. aestivum
TraesCS4D02G188100	OG0002319	T. aestivum
TraesCS2B02G284400	OG0006248	T. aestivum
TraesCS3D02G544100	OG0000375	T. aestivum
TraesCS5B02G083000	OG0000241	T. aestivum
TraesCS5D02G503200	OG0029457	T. aestivum
TraesCS1A02G077500	OG0004157	T. aestivum
TraesCS6B02G148200	OG0001556	T. aestivum
TraesCS3D02G355900	OG0005353	T. aestivum
TraesCS1B02G042100	OG0021362	T. aestivum
TraesCS7D02G260900	OG0000241	T. aestivum
TraesCS4D02G210900	OG0015821	T. aestivum
TraesCS7A02G371100	OG0009297	T. aestivum
TraesCS2A02G208000	OG0002118	T. aestivum
TraesCS7D02G521000	OG0002872	T. aestivum
TraesCS5B02G083600	OG0000241	T. aestivum
TraesCS7D02G417600	OG0001556	T. aestivum
TraesCS5A02G082400	OG0000241	T. aestivum
TraesCS4B02G107900	OG0002796	T. aestivum
TraesCS2A02G354400	OG0014581	T. aestivum
TraesCS4D02G092700	OG0002118	T. aestivum
TraesCS5B02G082500	OG0004157	T. aestivum
TraesCS5B02G083700	OG0000241	T. aestivum
TraesCS3D02G312000	OG0006007	T. aestivum
TraesCS3B02G202200	OG0004690	T. aestivum
TraesCS1B02G242200	OG0001707	T. aestivum
TraesCS4A02G204100	OG0002796	T. aestivum
TraesCS1B02G058600	OG0007180	T. aestivum
TraesCS4B02G360800	OG0001537	T. aestivum
TraesCS5D02G089900	OG0004157	T. aestivum
TraesCS3A02G277500	OG0018779	T. aestivum
TraesCS3B02G171100	OG0020121	T. aestivum
TraesCS2B02G374900	OG0014581	T. aestivum
TraesCS3B02G345800	OG0006007	T. aestivum
TraesCS3A02G222800	OG0001268	T. aestivum
TraesCS2B02G449200	OG0013093	T. aestivum
TraesCS7A02G107300	OG0007461	T. aestivum
TraesCS4B02G210100	OG0015821	T. aestivum
TraesCS5D02G090100	OG0000241	T. aestivum
TraesCS4B02G096200	OG0002118	T. aestivum
TraesCS1B02G275700	OG0002872	T. aestivum
TraesCS3B02G171000	OG0020121	T. aestivum
TraesCS3A02G362200	OG0005353	T. aestivum
TraesCS3D02G205200	OG0009188	T. aestivum
TraesCS5D02G293700	OG0000241	T. aestivum
TraesCS5A02G529100	OG0001537	T. aestivum
TraesCS2A02G339900	OG0003459	T. aestivum
TraesCS5D02G335100	OG0004690	T. aestivum
TraesCS3D02G277800	OG0018779	T. aestivum
TraesCS4A02G117600	OG0002319	T. aestivum
TraesCS7B02G450800	OG0002872	T. aestivum
TraesCS5B02G471500	OG0009967	T. aestivum
TraesCS2D02G500400	OG0001556	T. aestivum
TraesCS2D02G317400	OG0003459	T. aestivum
TraesCS3A02G163900	OG0004690	T. aestivum
TraesCS7A02G533600	OG0002872	T. aestivum
TraesCS5D02G474000	OG0009967	T. aestivum
TraesCS1A02G265000	OG0002872	T. aestivum
TraesCS7D02G101700	OG0007461	T. aestivum
TraesCS2A02G500200	OG0001556	T. aestivum
TraesCS5B02G082700	OG0000241	T. aestivum
TraesCS1D02G046000	OG0007180	T. aestivum
TraesCS6B02G389100	OG0024345	T. aestivum
TraesCS1A02G228100	OG0001707	T. aestivum
TraesCS2D02G354600	OG0014581	T. aestivum
TraesCS1B02G095600	OG0004157	T. aestivum
TraesCS1D02G265200	OG0002872	T. aestivum
TraesCS4D02G105000	OG0002796	T. aestivum
TraesCS5B02G329300	OG0004690	T. aestivum
TraesCS5A02G461300	OG0009967	T. aestivum
TraesCS4D02G343000	OG0000241	T. aestivum
TraesCS2B02G337800	OG0003459	T. aestivum
TraesCS5B02G182000	OG0010677	T. aestivum
TraesCS7A02G260000	OG0000241	T. aestivum
TraesCS5B02G470200	OG0006370	T. aestivum
TraesCS2D02G092500	OG0002319	T. aestivum
TraesCS4B02G348600	OG0000241	T. aestivum
TraesCS3A02G195600	OG0009188	T. aestivum
TraesCS2B02G108200	OG0002319	T. aestivum
TraesCS7B02G006000	OG0007461	T. aestivum
TraesCS5D02G188600	OG0010677	T. aestivum
TraesCS4A02G230500	OG0015037	T. aestivum
TraesCS5A02G183600	OG0010677	T. aestivum
TraesCS2D02G214800	OG0002118	T. aestivum
TraesCS3D02G323100	OG0011391	T. aestivum
TraesCS5A02G329200	OG0004690	T. aestivum
TraesCS5B02G238200	OG0019600	T. aestivum
TraesCS4B02G085400	OG0015037	T. aestivum
TraesCS5D02G153900	OG0010009	T. aestivum
TraesCS2B02G528100	OG0036072	T. aestivum
TraesCS4D02G083500	OG0015037	T. aestivum
TraesCS1A02G045300	OG0007180	T. aestivum
TraesCS2B02G077300	OG0002796	T. aestivum
TraesCS2D02G063200	OG0002796	T. aestivum
TraesCS6D02G251300	OG0010699	T. aestivum
TraesCS2A02G065100	OG0002796	T. aestivum
TraesCS3B02G359800	OG0011391	T. aestivum
TraesCS6B02G290600	OG0010699	T. aestivum
TraesCS5B02G137700	OG0010009	T. aestivum
TraesCS6A02G263600	OG0010699	T. aestivum
TraesCS3A02G329700	OG0011391	T. aestivum
TraesCS5A02G138200	OG0010009	T. aestivum
TraesCS5B02G285300	OG0029478	T. aestivum
TraesCS4D02G246600	OG0000241	T. aestivum
TraesCS4B02G247300	OG0000241	T. aestivum
TraesCS3B02G311700	OG0018779	T. aestivum
TraesCS7B02G158000	OG0000241	T. aestivum
TraesCS5D02G246700	OG0019600	T. aestivum
TraesCS5B02G180300	OG0007230	T. aestivum
TraesCS2B02G280200	OG0010379	T. aestivum
TraesCS5D02G186700	OG0007230	T. aestivum
TraesCS4A02G143500	OG0003933	T. aestivum
TraesCS5A02G239500	OG0019600	T. aestivum
TraesCS3B02G176900	OG0002792	T. aestivum
TraesCS1B02G232400	OG0012208	T. aestivum
TraesCS3A02G149800	OG0002792	T. aestivum
TraesCS3B02G170900	OG0020121	T. aestivum
TraesCS5B02G285200	OG0024220	T. aestivum
TraesCS6A02G037000	OG0036076	T. aestivum
TraesCS7A02G101900	OG0000241	T. aestivum
TraesCS3D02G157700	OG0002792	T. aestivum
TraesCS6A02G283000	OG0003990	T. aestivum
TraesCS6D02G263500	OG0003990	T. aestivum
TraesCS1A02G218900	OG0012208	T. aestivum
TraesCS5D02G376300	OG0006248	T. aestivum
TraesCS5A02G367000	OG0006248	T. aestivum
TraesCS7D02G095900	OG0000241	T. aestivum
TraesCS5B02G369300	OG0006248	T. aestivum
TraesCS1A02G394600	OG0000241	T. aestivum
TraesCS1B02G422100	OG0000241	T. aestivum
TraesCS5D02G293400	OG0024220	T. aestivum
TraesCS1D02G220600	OG0012208	T. aestivum
TraesCS5A02G129000	OG0006201	T. aestivum
TraesCS1D02G401800	OG0000241	T. aestivum
TraesCS7D02G224700	OG0003990	T. aestivum
TraesCS5A02G182300	OG0007230	T. aestivum
TraesCS7B02G129500	OG0003990	T. aestivum
TraesCS4B02G135100	OG0005752	T. aestivum
TraesCS7A02G223000	OG0003990	T. aestivum
TraesCS5A02G148200	OG0010833	T. aestivum
TraesCS4A02G217600	OG0002118	T. aestivum
TraesCS5B02G146700	OG0010833	T. aestivum
TraesCS5D02G144600	OG0010833	T. aestivum
TraesCS4A02G400600	OG0000241	T. aestivum
TraesCS6B02G051200	OG0036076	T. aestivum
TraesCS5A02G460400	OG0006370	T. aestivum
TraesCS4A02G183500	OG0005752	T. aestivum
TraesCS4D02G129800	OG0005752	T. aestivum
TraesCS2A02G262000	OG0010379	T. aestivum
TraesCS3A02G144400	OG0020121	T. aestivum
TraesCS5A02G285900	OG0024220	T. aestivum
TraesCS1A02G431500	OG0010777	T. aestivum
TraesCS2D02G544400	OG0010379	T. aestivum
TraesCS5B02G163200	OG0002978	T. aestivum
TraesCS5B02G115500	OG0013838	T. aestivum
TraesCS7A02G168400	OG0002978	T. aestivum
TraesCS5D02G117900	OG0013838	T. aestivum
TraesCS5D02G472100	OG0006370	T. aestivum
TraesCS7D02G169300	OG0002978	T. aestivum
TraesCS7B02G073200	OG0002978	T. aestivum
TraesCS3D02G365100	OG0012841	T. aestivum
TraesCS3A02G372300	OG0012841	T. aestivum
TraesCS1B02G466300	OG0010777	T. aestivum
TraesCS3B02G404700	OG0012841	T. aestivum
TraesCS5A02G116100	OG0013838	T. aestivum
TraesCS2D02G262000	OG0010379	T. aestivum
TraesCS5D02G170400	OG0002978	T. aestivum
TraesCS7B02G297000	OG0002499	T. aestivum
TraesCS3D02G153000	OG0020121	T. aestivum
TraesCS1D02G440600	OG0010777	T. aestivum
TraesCS6A02G325900	OG0018967	T. aestivum
TraesCS7A02G277300	OG0005350	T. aestivum
TraesCS6D02G305600	OG0018967	T. aestivum
TraesCS4B02G186800	OG0002319	T. aestivum
TraesCS7B02G175000	OG0005350	T. aestivum
TraesCS6A02G191000	OG0009278	T. aestivum
TraesCS7D02G277300	OG0005350	T. aestivum
TraesCS7A02G047900	OG0020170	T. aestivum
TraesCS4B02G382400	OG0011533	T. aestivum
TraesCS6D02G174700	OG0009278	T. aestivum
TraesCS6B02G231400	OG0009278	T. aestivum
TraesCS3B02G378000	OG0006081	T. aestivum
TraesCS3A02G200800	OG0006081	T. aestivum
TraesCS3D02G203100	OG0006081	T. aestivum
TraesCS7D02G390600	OG0002499	T. aestivum
TraesCS7A02G395000	OG0002499	T. aestivum
Glyma.02G169200	OG0001116	G. max
Glyma.15G172500	OG0023231	G. max
Glyma.09G105000	OG0001116	G. max
Glyma.02G295600	OG0009661	G. max
Glyma.14G017800	OG0009661	G. max
Glyma.02G006000	OG0000249	G. max
Glyma.09G066500	OG0023231	G. max
Glyma.13G348300	OG0032940	G. max
Glyma.03G234700	OG0003162	G. max
Glyma.04G053800	OG0000922	G. max
Glyma.19G248700	OG0000249	G. max
Glyma.03G251500	OG0000249	G. max
Glyma.05G155300	OG0001116	G. max
Glyma.08G113200	OG0001116	G. max
Glyma.14G065200	OG0000249	G. max
Glyma.10G006800	OG0000249	G. max
Glyma.20G203900	OG0000249	G. max
Glyma.17G218700	OG0000922	G. max
Glyma.03G206900	OG0001116	G. max
Glyma.17G052500	OG0023231	G. max
Glyma.10G186600	OG0000249	G. max
Glyma.19G232300	OG0003162	G. max
Glyma.02G025900	OG0001307	G. max
Glyma.10G166700	OG0000249	G. max
Glyma.19G204400	OG0001116	G. max
Glyma.09G285800	OG0006809	G. max
Glyma.01G038800	OG0001307	G. max
Glyma.08G293400	OG0001307	G. max
Glyma.06G027300	OG0000249	G. max
Glyma.20G222500	OG0000249	G. max
Glyma.02G250200	OG0005353	G. max
Glyma.18G129700	OG0001307	G. max
Glyma.16G114700	OG0006444	G. max
Glyma.14G108400	OG0000922	G. max
Glyma.18G180400	OG0033109	G. max
Glyma.07G131800	OG0033109	G. max
Glyma.09G249700	OG0005838	G. max
Glyma.07G248000	OG0004093	G. max
Glyma.05G212100	OG0000249	G. max
Glyma.20G100200	OG0006809	G. max
Glyma.10G288600	OG0006809	G. max
Glyma.12G219100	OG0008593	G. max
Glyma.10G288800	OG0006809	G. max
Glyma.14G161400	OG0001268	G. max
Glyma.08G018500	OG0000249	G. max
Glyma.09G195800	OG0006444	G. max
Glyma.14G024700	OG0009469	G. max
Glyma.06G176500	OG0002844	G. max
Glyma.06G054000	OG0000922	G. max
Glyma.02G251600	OG0000249	G. max
Glyma.14G195200	OG0005055	G. max
Glyma.19G069200	OG0033336	G. max
Glyma.02G151400	OG0013936	G. max
Glyma.13G042100	OG0001268	G. max
Glyma.14G162100	OG0033336	G. max
Glyma.11G222600	OG0005353	G. max
Glyma.17G026100	OG0004093	G. max
Glyma.18G242700	OG0005838	G. max
Glyma.11G042300	OG0010699	G. max
Glyma.02G228200	OG0005055	G. max
Glyma.06G016100	OG0004020	G. max
Glyma.05G042300	OG0002844	G. max
Glyma.08G093500	OG0000887	G. max
Glyma.06G176400	OG0002844	G. max
Glyma.02G231100	OG0007743	G. max
Glyma.05G247900	OG0000887	G. max
Glyma.17G125000	OG0002844	G. max
Glyma.08G093600	OG0000887	G. max
Glyma.20G011900	OG0000887	G. max
Glyma.14G066400	OG0005353	G. max
Glyma.07G047500	OG0002242	G. max
Glyma.01G199600	OG0010699	G. max
Glyma.05G247800	OG0000887	G. max
Glyma.08G056400	OG0000887	G. max
Glyma.06G028100	OG0006007	G. max
Glyma.08G311000	OG0004653	G. max
Glyma.18G283300	OG0032698	G. max
Glyma.17G109400	OG0012684	G. max
Glyma.19G062400	OG0015037	G. max
Glyma.15G201300	OG0002561	G. max
Glyma.16G016000	OG0002242	G. max
Glyma.04G059700	OG0015357	G. max
Glyma.02G290100	OG0009469	G. max
Glyma.14G198700	OG0007743	G. max
Glyma.17G029200	OG0026581	G. max
Glyma.08G093300	OG0000887	G. max
Glyma.08G314800	OG0009469	G. max
Glyma.15G166900	OG0014209	G. max
Glyma.13G155700	OG0014220	G. max
Glyma.18G035000	OG0005353	G. max
Glyma.05G138400	OG0000887	G. max
Glyma.16G209900	OG0014262	G. max
Glyma.04G069900	OG0009297	G. max
Glyma.09G096600	OG0002561	G. max
Glyma.09G111300	OG0004220	G. max
Glyma.17G105800	OG0002561	G. max
Glyma.18G061000	OG0005055	G. max
Glyma.07G244700	OG0026581	G. max
Glyma.07G144500	OG0002796	G. max
Glyma.19G147800	OG0004220	G. max
Glyma.01G191300	OG0003261	G. max
Glyma.06G071900	OG0009297	G. max
Glyma.09G060300	OG0014209	G. max
Glyma.06G060800	OG0000294	G. max
Glyma.13G165300	OG0002561	G. max
Glyma.17G223800	OG0000294	G. max
Glyma.11G139500	OG0010340	G. max
Glyma.12G063100	OG0010340	G. max
Glyma.03G233500	OG0001707	G. max
Glyma.11G087000	OG0004020	G. max
Glyma.13G312300	OG0002062	G. max
Glyma.13G106800	OG0023231	G. max
Glyma.16G015100	OG0009138	G. max
Glyma.09G248100	OG0010791	G. max
Glyma.07G021700	OG0000294	G. max
Glyma.05G113400	OG0010699	G. max
Glyma.13G135300	OG0026617	G. max
Glyma.20G238100	OG0001707	G. max
Glyma.19G230600	OG0001707	G. max
Glyma.08G220100	OG0000294	G. max
Glyma.10G071000	OG0005420	G. max
Glyma.10G022700	OG0013936	G. max
Glyma.10G150100	OG0001707	G. max
Glyma.19G194000	OG0006201	G. max
Glyma.01G158000	OG0004020	G. max
Glyma.12G221100	OG0009967	G. max
Glyma.09G045100	OG0004093	G. max
Glyma.13G280500	OG0009967	G. max
Glyma.11G018000	OG0005661	G. max
Glyma.11G050900	OG0003261	G. max
Glyma.10G218100	OG0002118	G. max
Glyma.11G170200	OG0005055	G. max
Glyma.18G196200	OG0002796	G. max
Glyma.20G244300	OG0000375	G. max
Glyma.12G109500	OG0003393	G. max
Glyma.19G176600	OG0033409	G. max
Glyma.11G171600	OG0005055	G. max
Glyma.10G047500	OG0026617	G. max
Glyma.12G189500	OG0002062	G. max
Glyma.18G244700	OG0010791	G. max
Glyma.19G261500	OG0002242	G. max
Glyma.09G034800	OG0000375	G. max
Glyma.10G294400	OG0000375	G. max
Glyma.02G192200	OG0009422	G. max
Glyma.01G225100	OG0005661	G. max
Glyma.12G007500	OG0006007	G. max
Glyma.12G095300	OG0002062	G. max
Glyma.15G139500	OG0000375	G. max
Glyma.10G259400	OG0003261	G. max
Glyma.04G128300	OG0000887	G. max
Glyma.03G194100	OG0005420	G. max
Glyma.12G012000	OG0011391	G. max
Glyma.02G044700	OG0003205	G. max
Glyma.06G296200	OG0003393	G. max
Glyma.08G033800	OG0032815	G. max
Glyma.01G111200	OG0002796	G. max
Glyma.04G038000	OG0003933	G. max
Glyma.16G122200	OG0003205	G. max
Glyma.12G202400	OG0003393	G. max
Glyma.09G225000	OG0011391	G. max
Glyma.03G076800	OG0002796	G. max
Glyma.05G227100	OG0032815	G. max
Glyma.06G039000	OG0003933	G. max
Glyma.07G233000	OG0020393	G. max
Glyma.07G253900	OG0007052	G. max
Glyma.17G153800	OG0010699	G. max
Glyma.20G248900	OG0032164	G. max
Glyma.14G101400	OG0000294	G. max
Glyma.02G172900	OG0004220	G. max
Glyma.07G047100	OG0009138	G. max
Glyma.10G009800	OG0004157	G. max
Glyma.02G009100	OG0004157	G. max
Glyma.19G230200	OG0002319	G. max
Glyma.04G200300	OG0002872	G. max
Glyma.20G131500	OG0003261	G. max
Glyma.17G221100	OG0001556	G. max
Glyma.06G059700	OG0001556	G. max
Glyma.04G059000	OG0001556	G. max
Glyma.06G028200	OG0006007	G. max
Glyma.08G008600	OG0002872	G. max
Glyma.10G271500	OG0009188	G. max
Glyma.13G274800	OG0003530	G. max
Glyma.11G255700	OG0004690	G. max
Glyma.20G119100	OG0009188	G. max
Glyma.14G104900	OG0001556	G. max
Glyma.17G034500	OG0000375	G. max
Glyma.03G176100	OG0033409	G. max
Glyma.17G020400	OG0007052	G. max
Glyma.08G351000	OG0004690	G. max
Glyma.09G179200	OG0010403	G. max
Glyma.05G201200	OG0002872	G. max
Glyma.19G193900	OG0005420	G. max
Glyma.11G004000	OG0006370	G. max
Glyma.06G238200	OG0003530	G. max
Glyma.06G130900	OG0008391	G. max
Glyma.20G173700	OG0002118	G. max
Glyma.15G100900	OG0007052	G. max
Glyma.07G239000	OG0000375	G. max
Glyma.13G211800	OG0007052	G. max
Glyma.14G082200	OG0003933	G. max
Glyma.20G106800	OG0003205	G. max
Glyma.17G038000	OG0020393	G. max
Glyma.13G299300	OG0003393	G. max
Glyma.06G145000	OG0010833	G. max
Glyma.08G178800	OG0003459	G. max
Glyma.18G208100	OG0007320	G. max
Glyma.09G031700	OG0020393	G. max
Glyma.10G200100	OG0001537	G. max
Glyma.04G101400	OG0003459	G. max
Glyma.06G103100	OG0003459	G. max
Glyma.10G282900	OG0003205	G. max
Glyma.05G116800	OG0003459	G. max
Glyma.03G194200	OG0006201	G. max
Glyma.17G243100	OG0003933	G. max
Glyma.09G280700	OG0007320	G. max
Glyma.08G291600	OG0000241	G. max
Glyma.20G190400	OG0001537	G. max
Glyma.04G233900	OG0008391	G. max
Glyma.09G229200	OG0006007	G. max
Glyma.19G129300	OG0010009	G. max
Glyma.10G004200	OG0022808	G. max
Glyma.03G126200	OG0010009	G. max
Glyma.08G071900	OG0003459	G. max
Glyma.15G053700	OG0003459	G. max
Glyma.18G132500	OG0000241	G. max
Glyma.10G149600	OG0002319	G. max
Glyma.02G117000	OG0000241	G. max
Glyma.03G225800	OG0005311	G. max
Glyma.06G050900	OG0004237	G. max
Glyma.03G152000	OG0033381	G. max
Glyma.17G230600	OG0004237	G. max
Glyma.17G244600	OG0006248	G. max
Glyma.12G226100	OG0003530	G. max
Glyma.03G233300	OG0002319	G. max
Glyma.12G116800	OG0003530	G. max
Glyma.04G220900	OG0010833	G. max
Glyma.20G026800	OG0010379	G. max
Glyma.18G001300	OG0004690	G. max
Glyma.19G222700	OG0005311	G. max
Glyma.01G127600	OG0016880	G. max
Glyma.20G238700	OG0002319	G. max
Glyma.19G026600	OG0007230	G. max
Glyma.10G291800	OG0025593	G. max
Glyma.05G174000	OG0023498	G. max
Glyma.02G266300	OG0003990	G. max
Glyma.20G207600	OG0022808	G. max
Glyma.07G099700	OG0010403	G. max
Glyma.19G154500	OG0033381	G. max
Glyma.08G131200	OG0023498	G. max
Glyma.14G051200	OG0003990	G. max
Glyma.02G095100	OG0007180	G. max
Glyma.18G013200	OG0023498	G. max
Glyma.18G286300	OG0007180	G. max
Glyma.14G080800	OG0006248	G. max
Glyma.10G182400	OG0022808	G. max
Glyma.17G016700	OG0002792	G. max
Glyma.07G257400	OG0002792	G. max
Glyma.04G060300	OG0026576	G. max
Glyma.05G047900	OG0000241	G. max
Glyma.11G243900	OG0023498	G. max
Glyma.02G267900	OG0002978	G. max
Glyma.01G239700	OG0006370	G. max
Glyma.17G144900	OG0012208	G. max
Glyma.05G062900	OG0012208	G. max
Glyma.08G032000	OG0007461	G. max
Glyma.16G073500	OG0010777	G. max
Glyma.05G225200	OG0007461	G. max
Glyma.19G069800	OG0010777	G. max
Glyma.14G049600	OG0002978	G. max
Glyma.04G016100	OG0004020	G. max
Glyma.06G170300	OG0000241	G. max
Glyma.08G259100	OG0032698	G. max
Glyma.07G264400	OG0002978	G. max
Glyma.20G126600	OG0013838	G. max
Glyma.10G279000	OG0012841	G. max
Glyma.11G052700	OG0032894	G. max
Glyma.10G263700	OG0013838	G. max
Glyma.03G043700	OG0016880	G. max
Glyma.01G189500	OG0032894	G. max
Glyma.04G060400	OG0026529	G. max
Glyma.08G241500	OG0031480	G. max
Glyma.02G162300	OG0006081	G. max
Glyma.09G250700	OG0016615	G. max
Glyma.20G110700	OG0012841	G. max
Glyma.10G170900	OG0016615	G. max
Glyma.18G241800	OG0016615	G. max
Glyma.03G043100	OG0016880	G. max
Glyma.03G044100	OG0016880	G. max
Glyma.10G297900	OG0032164	G. max
Glyma.04G146200	OG0031915	G. max
Glyma.09G194200	OG0009278	G. max
Glyma.01G146600	OG0009278	G. max
Glyma.02G144500	OG0002499	G. max
LOC_Os01g24750	OG0003162	O. sativa
LOC_Os05g50970	OG0021412	O. sativa
LOC_Os08g40200	OG0006444	O. sativa
LOC_Os06g37660	OG0001307	O. sativa
LOC_Os02g12580	OG0001307	O. sativa
LOC_Os04g54340	OG0008593	O. sativa
LOC_Os09g11230	OG0009661	O. sativa
LOC_Os10g27050	OG0001116	O. sativa
LOC_Os03g59060	OG0001116	O. sativa
LOC_Os03g07150	OG0001116	O. sativa
LOC_Os02g38580	OG0017128	O. sativa
LOC_Os02g38494	OG0017128	O. sativa
LOC_Os08g39100	OG0005838	O. sativa
LOC_Os03g16110	OG0000249	O. sativa
LOC_Os02g57450	OG0000249	O. sativa
LOC_Os08g35440	OG0000249	O. sativa
LOC_Os03g16760	OG0011533	O. sativa
LOC_Os05g46040	OG0006583	O. sativa
LOC_Os07g48840	OG0002844	O. sativa
LOC_Os06g06880	OG0000249	O. sativa
LOC_Os01g49690	OG0006809	O. sativa
LOC_Os01g66920	OG0010791	O. sativa
LOC_Os09g36290	OG0002242	O. sativa
LOC_Os05g51510	OG0000922	O. sativa
LOC_Os06g48570	OG0014209	O. sativa
LOC_Os03g37130	OG0009469	O. sativa
LOC_Os05g11550	OG0004653	O. sativa
LOC_Os03g27950	OG0009138	O. sativa
LOC_Os02g27220	OG0012985	O. sativa
LOC_Os09g38550	OG0000294	O. sativa
LOC_Os02g38804	OG0017128	O. sativa
LOC_Os01g62760	OG0005353	O. sativa
LOC_Os01g46760	OG0005661	O. sativa
LOC_Os04g49490	OG0004220	O. sativa
LOC_Os01g40094	OG0000922	O. sativa
LOC_Os12g44030	OG0024345	O. sativa
LOC_Os02g38690	OG0017128	O. sativa
LOC_Os02g55560	OG0002561	O. sativa
LOC_Os02g15594	OG0001268	O. sativa
LOC_Os03g61690	OG0000375	O. sativa
LOC_Os03g10950	OG0019012	O. sativa
LOC_Os05g49730	OG0005661	O. sativa
LOC_Os01g74530	OG0000375	O. sativa
LOC_Os12g01770	OG0007320	O. sativa
LOC_Os04g33080	OG0004093	O. sativa
LOC_Os07g17280	OG0010791	O. sativa
LOC_Os11g05410	OG0006201	O. sativa
LOC_Os02g13100	OG0004237	O. sativa
LOC_Os06g08390	OG0014220	O. sativa
LOC_Os06g11910	OG0016794	O. sativa
LOC_Os07g37890	OG0003393	O. sativa
LOC_Os12g38750	OG0000241	O. sativa
LOC_Os03g04430	OG0000375	O. sativa
LOC_Os03g04430	OG0031601	O. sativa
LOC_Os11g34720	OG0013244	O. sativa
LOC_Os03g15430	OG0014519	O. sativa
LOC_Os09g14540	OG0010403	O. sativa
LOC_Os12g44020	OG0009967	O. sativa
LOC_Os02g46080	OG0004220	O. sativa
LOC_Os01g71420	OG0009422	O. sativa
LOC_Os04g33470	OG0003169	O. sativa
LOC_Os12g07590	OG0002118	O. sativa
LOC_Os11g34710	OG0020344	O. sativa
LOC_Os03g60650	OG0010340	O. sativa
LOC_Os12g05540	OG0006201	O. sativa
LOC_Os03g13540	OG0000887	O. sativa
LOC_Os02g38710	OG0017128	O. sativa
LOC_Os03g55320	OG0003261	O. sativa
LOC_Os05g38290	OG0005353	O. sativa
LOC_Os08g08030	OG0008593	O. sativa
LOC_Os03g18150	OG0005055	O. sativa
LOC_Os05g05240	OG0013936	O. sativa
LOC_Os04g25570	OG0015899	O. sativa
LOC_Os04g42260	OG0014581	O. sativa
LOC_Os06g39600	OG0009297	O. sativa
LOC_Os12g42310	OG0002062	O. sativa
LOC_Os11g11070	OG0002796	O. sativa
LOC_Os10g39780	OG0000375	O. sativa
LOC_Os10g39780	OG0034845	O. sativa
LOC_Os04g33530	OG0005420	O. sativa
LOC_Os06g08140	OG0002561	O. sativa
LOC_Os06g43640	OG0012684	O. sativa
LOC_Os12g39120	OG0003261	O. sativa
LOC_Os01g37130	OG0008391	O. sativa
LOC_Os06g44210	OG0000294	O. sativa
LOC_Os12g38770	OG0000241	O. sativa
LOC_Os06g50380	OG0003205	O. sativa
LOC_Os09g15670	OG0010677	O. sativa
LOC_Os01g19130	OG0004157	O. sativa
LOC_Os11g22404	OG0021642	O. sativa
LOC_Os11g13820	OG0016191	O. sativa
LOC_Os05g29030	OG0001707	O. sativa
LOC_Os07g45170	OG0007052	O. sativa
LOC_Os10g35060	OG0014262	O. sativa
LOC_Os02g08364	OG0000294	O. sativa
LOC_Os02g05630	OG0001556	O. sativa
LOC_Os11g01790	OG0007320	O. sativa
LOC_Os03g44500	OG0002062	O. sativa
LOC_Os04g37660	OG0008779	O. sativa
LOC_Os06g33549	OG0021459	O. sativa
LOC_Os10g02750	OG0000887	O. sativa
LOC_Os01g56880	OG0006007	O. sativa
LOC_Os12g09640	OG0027841	O. sativa
LOC_Os02g39410	OG0023748	O. sativa
LOC_Os05g02110	OG0021362	O. sativa
LOC_Os05g04360	OG0004157	O. sativa
LOC_Os01g20940	OG0002872	O. sativa
LOC_Os10g25430	OG0007743	O. sativa
LOC_Os02g39480	OG0023748	O. sativa
LOC_Os02g16550	OG0009516	O. sativa
LOC_Os06g48300	OG0001556	O. sativa
LOC_Os11g15570	OG0015037	O. sativa
LOC_Os03g27780	OG0003933	O. sativa
LOC_Os03g18970	OG0002319	O. sativa
LOC_Os12g44010	OG0017825	O. sativa
LOC_Os01g24470	OG0002872	O. sativa
LOC_Os02g35910	OG0012993	O. sativa
LOC_Os07g49040	OG0002319	O. sativa
LOC_Os06g05870	OG0007461	O. sativa
LOC_Os06g05870	OG0034365	O. sativa
LOC_Os10g39540	OG0004020	O. sativa
LOC_Os10g39540	OG0031915	O. sativa
LOC_Os02g46490	OG0010699	O. sativa
LOC_Os01g58640	OG0011391	O. sativa
LOC_Os02g38780	OG0017128	O. sativa
LOC_Os02g38780	OG0023744	O. sativa
LOC_Os11g05400	OG0005420	O. sativa
LOC_Os04g52000	OG0013093	O. sativa
LOC_Os01g36080	OG0006081	O. sativa
LOC_Os03g11530	OG0000241	O. sativa
LOC_Os07g32380	OG0003530	O. sativa
LOC_Os05g44910	OG0027465	O. sativa
LOC_Os03g16170	OG0015821	O. sativa
LOC_Os04g56450	OG0001556	O. sativa
LOC_Os12g09120	OG0002796	O. sativa
LOC_Os03g01750	OG0001537	O. sativa
LOC_Os01g29469	OG0002792	O. sativa
LOC_Os07g01540	OG0006248	O. sativa
LOC_Os06g20340	OG0003990	O. sativa
LOC_Os03g25600	OG0005311	O. sativa
LOC_Os04g37904	OG0003459	O. sativa
LOC_Os12g38760	OG0000241	O. sativa
LOC_Os08g17784	OG0007230	O. sativa
LOC_Os01g53710	OG0018779	O. sativa
LOC_Os09g32840	OG0000241	O. sativa
LOC_Os11g07850	OG0002118	O. sativa
LOC_Os09g28560	OG0019600	O. sativa
LOC_Os05g02500	OG0007180	O. sativa
LOC_Os03g63074	OG0004690	O. sativa
LOC_Os03g63074	OG0011390	O. sativa
LOC_Os12g02120	OG0010833	O. sativa
LOC_Os11g02180	OG0010833	O. sativa
LOC_Os11g03290	OG0000595	O. sativa
LOC_Os07g04210	OG0006248	O. sativa
LOC_Os12g03990	OG0010009	O. sativa
LOC_Os10g41240	OG0012208	O. sativa
LOC_Os02g48840	OG0003990	O. sativa
LOC_Os11g04180	OG0010009	O. sativa
LOC_Os01g64010	OG0012841	O. sativa
LOC_Os08g29160	OG0010777	O. sativa
LOC_Os07g11010	OG0006370	O. sativa
LOC_Os08g41880	OG0000241	O. sativa
LOC_Os01g32964	OG0009188	O. sativa
LOC_Os07g02090	OG0010379	O. sativa
LOC_Os12g05660	OG0005752	O. sativa
LOC_Os03g49510	OG0002324	O. sativa
LOC_Os09g05020	OG0002978	O. sativa
LOC_Os11g06630	OG0014467	O. sativa
LOC_Os06g10650	OG0002978	O. sativa
LOC_Os12g21890	OG0013838	O. sativa
LOC_Os12g23190	OG0016615	O. sativa
LOC_Os02g39470	OG0023747	O. sativa
LOC_Os02g53160	OG0018967	O. sativa
LOC_Os09g01520	OG0003764	O. sativa
LOC_Os09g32830	OG0024220	O. sativa
LOC_Os07g38460	OG0017563	O. sativa
LOC_Os12g36940	OG0035032	O. sativa
LOC_Os03g59530	OG0006370	O. sativa
LOC_Os12g41430	OG0027879	O. sativa
LOC_Os12g03580	OG0027138	O. sativa
LOC_Os09g38330	OG0009212	O. sativa
LOC_Os02g17970	OG0009278	O. sativa
LOC_Os01g13090	OG0018377	O. sativa
LOC_Os01g13100	OG0000913	O. sativa
LOC_Os08g44260	OG0005350	O. sativa
LOC_Os12g21870	OG0016495	O. sativa
LOC_Os01g52810	OG0027106	O. sativa
LOC_Os11g37540	OG0002499	O. sativa
SORBI_3003G158400	OG0003162	S. bicolor
SORBI_3006G231800	OG0008593	S. bicolor
SORBI_3004G092500	OG0001307	S. bicolor
SORBI_3001G492300	OG0001116	S. bicolor
SORBI_3001G251700	OG0001116	S. bicolor
SORBI_3010G174800	OG0001307	S. bicolor
SORBI_3002G157300	OG0009661	S. bicolor
SORBI_3003G198200	OG0000922	S. bicolor
SORBI_3007G207400	OG0006444	S. bicolor
SORBI_3009G250900	OG0021412	S. bicolor
SORBI_3001G049400	OG0001116	S. bicolor
SORBI_3004G348300	OG0000249	S. bicolor
SORBI_3007G061500	OG0035736	S. bicolor
SORBI_3010G051500	OG0000249	S. bicolor
SORBI_3003G264200	OG0006809	S. bicolor
SORBI_3007G148600	OG0000249	S. bicolor
SORBI_3007G171600	OG0021887	S. bicolor
SORBI_3006G064100	OG0004093	S. bicolor
SORBI_3001G425000	OG0000249	S. bicolor
SORBI_3009G075800	OG0004653	S. bicolor
SORBI_3002G132300	OG0002844	S. bicolor
SORBI_3007G216600	OG0005838	S. bicolor
SORBI_3008G037000	OG0006201	S. bicolor
SORBI_3010G249300	OG0014209	S. bicolor
SORBI_3001G107600	OG0015357	S. bicolor
SORBI_3004G143700	OG0012985	S. bicolor
SORBI_3001G186800	OG0009469	S. bicolor
SORBI_3003G385300	OG0010791	S. bicolor
SORBI_3009G050000	OG0003162	S. bicolor
SORBI_3008G008500	OG0007320	S. bicolor
SORBI_3003G222400	OG0016267	S. bicolor
SORBI_3001G406300	OG0005055	S. bicolor
SORBI_3009G013600	OG0021362	S. bicolor
SORBI_3009G213000	OG0006583	S. bicolor
SORBI_3001G309500	OG0000375	S. bicolor
SORBI_3010G064500	OG0014220	S. bicolor
SORBI_3005G087666	OG0016191	S. bicolor
SORBI_3009G255900	OG0000922	S. bicolor
SORBI_3004G096300	OG0004237	S. bicolor
SORBI_3009G238600	OG0005661	S. bicolor
SORBI_3001G421000	OG0011533	S. bicolor
SORBI_3006G067500	OG0003169	S. bicolor
SORBI_3003G421800	OG0009422	S. bicolor
SORBI_3005G146300	OG0013244	S. bicolor
SORBI_3002G275900	OG0002242	S. bicolor
SORBI_3009G161800	OG0005353	S. bicolor
SORBI_3001G013800	OG0004690	S. bicolor
SORBI_3003G354000	OG0005353	S. bicolor
SORBI_3009G032400	OG0004157	S. bicolor
SORBI_3006G098100	OG0008779	S. bicolor
SORBI_3002G342000	OG0003393	S. bicolor
SORBI_3005G087800	OG0016191	S. bicolor
SORBI_3002G397600	OG0007052	S. bicolor
SORBI_3001G512600	OG0000375	S. bicolor
SORBI_3004G279200	OG0004220	S. bicolor
SORBI_3006G192200	OG0004220	S. bicolor
SORBI_3008G036300	OG0005420	S. bicolor
SORBI_3001G421200	OG0011533	S. bicolor
SORBI_3010G153400	OG0021459	S. bicolor
SORBI_3003G275501	OG0006583	S. bicolor
SORBI_3010G180700	OG0009297	S. bicolor
SORBI_3001G442300	OG0000887	S. bicolor
SORBI_3004G113600	OG0001268	S. bicolor
SORBI_3006G137000	OG0014581	S. bicolor
SORBI_3009G040700	OG0013936	S. bicolor
SORBI_3003G167000	OG0009188	S. bicolor
SORBI_3003G185900	OG0008391	S. bicolor
SORBI_3001G442200	OG0000887	S. bicolor
SORBI_3002G104600	OG0010791	S. bicolor
SORBI_3001G208300	OG0014262	S. bicolor
SORBI_3002G166500	OG0010403	S. bicolor
SORBI_3004G332900	OG0002561	S. bicolor
SORBI_3010G062500	OG0002561	S. bicolor
SORBI_3001G462800	OG0019012	S. bicolor
SORBI_3008G071300	OG0027841	S. bicolor
SORBI_3001G081600	OG0003261	S. bicolor
SORBI_3003G242200	OG0005661	S. bicolor
SORBI_3005G007900	OG0007320	S. bicolor
SORBI_3004G136400	OG0021642	S. bicolor
SORBI_3003G314400	OG0006007	S. bicolor
SORBI_3001G430400	OG0014519	S. bicolor
SORBI_3002G303700	OG0000241	S. bicolor
SORBI_3005G147800	OG0013244	S. bicolor
SORBI_3003G198900	OG0015899	S. bicolor
SORBI_3004G275900	OG0010699	S. bicolor
SORBI_3001G025700	OG0000375	S. bicolor
SORBI_3008G113000	OG0009967	S. bicolor
SORBI_3008G173900	OG0002062	S. bicolor
SORBI_3004G041500	OG0001556	S. bicolor
SORBI_3003G141000	OG0004157	S. bicolor
SORBI_3009G250300	OG0009967	S. bicolor
SORBI_3007G078000	OG0013093	S. bicolor
SORBI_3006G018400	OG0013298	S. bicolor
SORBI_3006G038800	OG0000241	S. bicolor
SORBI_3001G258200	OG0007743	S. bicolor
SORBI_3010G205200	OG0012684	S. bicolor
SORBI_3001G154900	OG0002062	S. bicolor
SORBI_3002G317500	OG0021778	S. bicolor
SORBI_3010G268300	OG0003205	S. bicolor
SORBI_3001G034100	OG0010340	S. bicolor
SORBI_3004G186300	OG0012993	S. bicolor
SORBI_3003G147500	OG0002872	S. bicolor
SORBI_3004G065200	OG0000294	S. bicolor
SORBI_3006G068100	OG0005420	S. bicolor
SORBI_3010G247600	OG0001556	S. bicolor
SORBI_3008G055500	OG0002118	S. bicolor
SORBI_3007G091100	OG0007230	S. bicolor
SORBI_3006G067400	OG0003169	S. bicolor
SORBI_3002G172000	OG0010677	S. bicolor
SORBI_3008G189500	OG0024345	S. bicolor
SORBI_3006G209400	OG0013093	S. bicolor
SORBI_3001G424400	OG0015821	S. bicolor
SORBI_3002G294400	OG0000294	S. bicolor
SORBI_3002G226800	OG0019600	S. bicolor
SORBI_3001G456800	OG0000241	S. bicolor
SORBI_3001G312500	OG0004020	S. bicolor
SORBI_3002G427300	OG0002319	S. bicolor
SORBI_3001G358800	OG0005311	S. bicolor
SORBI_3005G100700	OG0002796	S. bicolor
SORBI_3010G089800	OG0016794	S. bicolor
SORBI_3009G109700	OG0001707	S. bicolor
SORBI_3002G312900	OG0003530	S. bicolor
SORBI_3006G249700	OG0001556	S. bicolor
SORBI_3005G061801	OG0002118	S. bicolor
SORBI_3001G136800	OG0002792	S. bicolor
SORBI_3003G326100	OG0011391	S. bicolor
SORBI_3003G158000	OG0002872	S. bicolor
SORBI_3001G346700	OG0009138	S. bicolor
SORBI_3010G211300	OG0000294	S. bicolor
SORBI_3010G041500	OG0007461	S. bicolor
SORBI_3008G140300	OG0000241	S. bicolor
SORBI_3008G140100	OG0000241	S. bicolor
SORBI_3001G347700	OG0003933	S. bicolor
SORBI_3006G073100	OG0014581	S. bicolor
SORBI_3007G190200	OG0000241	S. bicolor
SORBI_3003G326000	OG0011391	S. bicolor
SORBI_3006G225600	OG0003459	S. bicolor
SORBI_3009G017400	OG0007180	S. bicolor
SORBI_3003G290100	OG0018779	S. bicolor
SORBI_3001G538800	OG0001537	S. bicolor
SORBI_3004G117800	OG0009516	S. bicolor
SORBI_3009G204200	OG0027465	S. bicolor
SORBI_3005G080200	OG0015037	S. bicolor
SORBI_3001G399300	OG0002319	S. bicolor
SORBI_3007G194100	OG0000241	S. bicolor
SORBI_3004G202900	OG0010379	S. bicolor
SORBI_3008G032300	OG0010833	S. bicolor
SORBI_3001G296900	OG0012208	S. bicolor
SORBI_3002G004600	OG0006248	S. bicolor
SORBI_3004G258600	OG0003990	S. bicolor
SORBI_3002G131200	OG0006248	S. bicolor
SORBI_3002G076500	OG0006370	S. bicolor
SORBI_3005G025800	OG0010009	S. bicolor
SORBI_3009G110300	OG0035239	S. bicolor
SORBI_3010G129600	OG0003990	S. bicolor
SORBI_3002G260300	OG0010677	S. bicolor
SORBI_3003G363500	OG0012841	S. bicolor
SORBI_3007G102000	OG0006936	S. bicolor
SORBI_3002G347400	OG0017563	S. bicolor
SORBI_3004G312800	OG0018967	S. bicolor
SORBI_3002G008800	OG0013838	S. bicolor
SORBI_3007G116600	OG0010777	S. bicolor
SORBI_3002G008500	OG0010379	S. bicolor
SORBI_3005G038600	OG0005752	S. bicolor
SORBI_3010G079000	OG0002978	S. bicolor
SORBI_3001G342700	OG0035239	S. bicolor
SORBI_3007G011000	OG0009097	S. bicolor
SORBI_3003G311800	OG0017020	S. bicolor
SORBI_3008G055366	OG0002118	S. bicolor
SORBI_3005G167700	OG0002499	S. bicolor
SORBI_3004G127800	OG0009278	S. bicolor
SORBI_3002G360701	OG0010677	S. bicolor
SORBI_3003G182700	OG0006081	S. bicolor
SORBI_3001G473300	OG0002512	S. bicolor
SORBI_3003G182600	OG0006081	S. bicolor
SORBI_3004G224350	OG0010076	S. bicolor
AT1G03445	OG0030280	A. thaliana
AT1G07010	OG0007743	A. thaliana
AT1G08420	OG0002062	A. thaliana
AT1G10430	OG0001307	A. thaliana
AT1G13750	OG0000241	A. thaliana
AT1G14700	OG0020344	A. thaliana
AT1G18480	OG0015037	A. thaliana
AT1G25230	OG0000887	A. thaliana
AT1G50370	OG0006809	A. thaliana
AT1G53710	OG0009138	A. thaliana
AT1G56360	OG0030546	A. thaliana
AT1G59830	OG0001307	A. thaliana
AT1G59830	OG0030560	A. thaliana
AT1G64040	OG0000249	A. thaliana
AT1G69960	OG0001307	A. thaliana
AT2G01880	OG0000887	A. thaliana
AT2G01890	OG0000887	A. thaliana
AT2G03450	OG0010379	A. thaliana
AT2G16430	OG0006007	A. thaliana
AT2G18130	OG0030739	A. thaliana
AT2G27190	OG0006007	A. thaliana
AT2G27210	OG0002062	A. thaliana
AT2G29400	OG0000249	A. thaliana
AT2G39840	OG0000249	A. thaliana
AT2G42500	OG0001116	A. thaliana
AT2G42500	OG0025897	A. thaliana
AT2G42500	OG0025898	A. thaliana
AT2G42810	OG0004653	A. thaliana
AT2G46880	OG0030879	A. thaliana
AT3G03305	OG0010791	A. thaliana
AT3G05580	OG0003162	A. thaliana
AT3G07130	OG0004690	A. thaliana
AT3G09960	OG0003169	A. thaliana
AT3G09970	OG0003169	A. thaliana
AT3G10150	OG0009422	A. thaliana
AT3G17790	OG0000887	A. thaliana
AT3G19980	OG0006809	A. thaliana
AT3G20500	OG0009469	A. thaliana
AT3G46120	OG0030739	A. thaliana
AT3G46820	OG0000249	A. thaliana
AT3G52780	OG0006201	A. thaliana
AT3G52820	OG0005420	A. thaliana
AT3G58500	OG0001116	A. thaliana
AT4G03080	OG0013936	A. thaliana
AT4G11240	OG0000249	A. thaliana
AT4G13700	OG0007230	A. thaliana
AT4G24730	OG0002844	A. thaliana
AT4G24890	OG0000241	A. thaliana
AT4G26720	OG0009661	A. thaliana
AT4G31770	OG0015357	A. thaliana
AT4G36350	OG0030546	A. thaliana
AT5G27840	OG0003162	A. thaliana
AT5G34850	OG0012684	A. thaliana
AT5G43380	OG0000249	A. thaliana
AT5G50400	OG0000241	A. thaliana
AT5G54260	OG0008593	A. thaliana
AT5G55260	OG0009661	A. thaliana
AT5G57140	OG0014209	A. thaliana
AT5G58200	OG0014220	A. thaliana
AT5G59160	OG0000249	A. thaliana
AT5G63140	OG0002242	A. thaliana
AT5G63870	OG0006444	A. thaliana
AT2G04550	OG0003990	A. thaliana
AT3G01510	OG0010777	A. thaliana
AT3G06110	OG0002792	A. thaliana
AT3G09100	OG0002796	A. thaliana
AT3G10940	OG0010833	A. thaliana
AT3G23610	OG0002792	A. thaliana
AT3G52180	OG0001537	A. thaliana
AT3G55270	OG0007180	A. thaliana
AT5G01290	OG0002796	A. thaliana
AT5G23720	OG0002872	A. thaliana
AT5G56610	OG0007461	A. thaliana
AT1G03590	OG0003393	A. thaliana
AT1G07160	OG0005055	A. thaliana
AT1G07630	OG0010340	A. thaliana
AT1G09160	OG0002319	A. thaliana
AT1G16220	OG0005838	A. thaliana
AT1G17550	OG0015034	A. thaliana
AT1G18030	OG0010403	A. thaliana
AT1G22280	OG0025536	A. thaliana
AT1G34750	OG0003459	A. thaliana
AT1G43900	OG0025593	A. thaliana
AT1G47380	OG0003933	A. thaliana
AT1G48040	OG0020393	A. thaliana
AT1G67820	OG0030597	A. thaliana
AT1G68410	OG0009188	A. thaliana
AT1G72770	OG0015034	A. thaliana
AT1G78200	OG0020449	A. thaliana
AT1G79630	OG0015130	A. thaliana
AT2G20630	OG0003530	A. thaliana
AT2G25070	OG0000294	A. thaliana
AT2G25620	OG0009297	A. thaliana
AT2G28890	OG0010340	A. thaliana
AT2G29380	OG0010677	A. thaliana
AT2G30020	OG0005055	A. thaliana
AT2G33700	OG0004020	A. thaliana
AT2G34740	OG0025853	A. thaliana
AT2G35350	OG0010699	A. thaliana
AT2G40180	OG0005055	A. thaliana
AT2G46920	OG0005311	A. thaliana
AT3G02750	OG0005838	A. thaliana
AT3G05640	OG0001707	A. thaliana
AT3G06270	OG0007052	A. thaliana
AT3G09400	OG0025968	A. thaliana
AT3G11410	OG0005353	A. thaliana
AT3G12620	OG0000375	A. thaliana
AT3G15260	OG0003530	A. thaliana
AT3G16560	OG0004093	A. thaliana
AT3G16800	OG0018379	A. thaliana
AT3G17090	OG0000375	A. thaliana
AT3G17250	OG0020393	A. thaliana
AT3G23360	OG0022808	A. thaliana
AT3G51370	OG0003205	A. thaliana
AT3G51470	OG0004020	A. thaliana
AT3G55050	OG0031132	A. thaliana
AT3G62260	OG0004157	A. thaliana
AT3G63320	OG0002499	A. thaliana
AT3G63340	OG0002499	A. thaliana
AT4G03415	OG0003393	A. thaliana
AT4G08260	OG0025757	A. thaliana
AT4G26080	OG0000922	A. thaliana
AT4G27800	OG0008391	A. thaliana
AT4G28400	OG0003530	A. thaliana
AT4G31750	OG0001556	A. thaliana
AT4G31860	OG0000294	A. thaliana
AT4G32950	OG0031339	A. thaliana
AT4G33920	OG0003261	A. thaliana
AT4G38520	OG0003205	A. thaliana
AT5G01700	OG0007320	A. thaliana
AT5G02400	OG0025968	A. thaliana
AT5G06750	OG0004220	A. thaliana
AT5G10740	OG0001556	A. thaliana
AT5G26010	OG0004237	A. thaliana
AT5G27930	OG0001707	A. thaliana
AT5G36250	OG0026373	A. thaliana
AT5G51760	OG0031532	A. thaliana
AT5G53140	OG0001268	A. thaliana
AT5G57050	OG0000922	A. thaliana
AT5G59220	OG0031565	A. thaliana
AT5G66080	OG0031601	A. thaliana
AT1G71860	OG0002118	A. thaliana
AT3G47810	OG0009516	A. thaliana
AT5G39400	OG0031480	A. thaliana
AT2G34260	OG0009332	A. thaliana
AT2G40570	OG0006994	A. thaliana
AT2G35680	OG0012208	A. thaliana
AT5G10900	OG0026326	A. thaliana
AT4G11800	OG0006248	A. thaliana
AT2G32770	OG0025845	A. thaliana
AT1G48120	OG0018204	A. thaliana
AT1G13900	OG0010379	A. thaliana
AT5G19280	OG0006370	A. thaliana
AT4G33500	OG0002512	A. thaliana
AT4G11040	OG0031220	A. thaliana
AT3G27140	OG0025757	A. thaliana
AT2G40860	OG0006081	A. thaliana
AT2G30170	OG0003544	A. thaliana
AT2G20050	OG0009278	A. thaliana
AT2G05050	OG0025757	A. thaliana
AT1G17545	OG0015034	A. thaliana
