# Supplementary material for: Functional annotation of proteins for signaling network inference in non-model species
Source: Research Square preprint supplement (doi:10.21203/rs.3.rs-2201240/v1), 2022-11-11
Supplement: Supplementary file 4 [file 8bfcf2864361753b35729040.xlsx]

## Sheet: Blad1
Supplementary Table S4 - PF-NET predictions for the entire Arabidopsis thaliana proteome
Gene	PF	Kinase/Phosphatase?
AT1G01010	PF00059
AT1G01020	PF06454
AT1G01020	PF03151
AT1G01020	PF03798
AT1G01020	PF00916
AT1G01030	PF02362
AT1G01050	PF00534
AT1G01060	PF00249
AT1G01060	PF00505
AT1G01070	PF00892
AT1G01080	PF00076
AT1G01090	PF00676
AT1G01100	PF00364
AT1G01100	PF00403
AT1G01110	PF13178
AT1G01120	PF08392
AT1G01130	PF00855
AT1G01140	PF00069	Kinase
AT1G01150	PF00249
AT1G01150	PF01485
AT1G01160	PF16987
AT1G01160	PF00307
AT1G01170	PF14237
AT1G01180	PF08241
AT1G01190	PF02889
AT1G01190	PF00931
AT1G01200	PF01926
AT1G01210	PF03107
AT1G01220	PF00288
AT1G01225	PF04970
AT1G01230	PF03798
AT1G01240	PF09177
AT1G01250	PF13919
AT1G01260	PF14215
AT1G01280	PF01852
AT1G01290	PF01967
AT1G01300	PF14543
AT1G01305	PF05617
AT1G01310	PF00188
AT1G01335	PF00646
AT1G01340	PF00027
AT1G01350	PF00097
AT1G01355	PF00329
AT1G01355	PF12171
AT1G01355	PF01507
AT1G01360	PF02357
AT1G01370	PF00125
AT1G01380	PF00249
AT1G01380	PF05699
AT1G01390	PF00891
AT1G01400	PF05678
AT1G01410	PF01399
AT1G01420	PF03033
AT1G01430	PF14416
AT1G01440	PF11331
AT1G01450	PF00069	Kinase
AT1G01453	PF03168
AT1G01460	PF00168
AT1G01470	PF01883
AT1G01480	PF00155
AT1G01490	PF00403
AT1G01490	PF13881
AT1G01500	PF00622
AT1G01510	PF02826
AT1G01520	PF00249
AT1G01520	PF00069	Kinase
AT1G01530	PF00319
AT1G01540	PF00069	Kinase
AT1G01550	PF00307
AT1G01560	PF00069	Kinase
AT1G01570	PF01823
AT1G01570	PF00685
AT1G01580	PF01794
AT1G01590	PF01794
AT1G01600	PF06974
AT1G01610	PF01553
AT1G01620	PF00909
AT1G01620	PF00137
AT1G01630	PF00650
AT1G01640	PF00651
AT1G01650	PF02225
AT1G01650	PF07786
AT1G01660	PF03469
AT1G01670	PF00383
AT1G01670	PF01541
AT1G01680	PF00249
AT1G01690	PF14383
AT1G01695	PF14309
AT1G01700	PF00004
AT1G01700	PF02263
AT1G01710	PF00027
AT1G01715	PF18265
AT1G01720	PF00505
AT1G01725	PF00550
AT1G01730	PF00010
AT1G01740	PF00069	Kinase
AT1G01750	PF05699
AT1G01750	PF03364
AT1G01760	PF00089
AT1G01760	PF01823
AT1G01760	PF00035
AT1G01770	PF01565
AT1G01780	PF01485
AT1G01790	PF00999
AT1G01800	PF03446
AT1G01800	PF00171
AT1G01810	PF12214
AT1G01820	PF00931
AT1G01830	PF08609
AT1G01840	PF00808
AT1G01860	PF01170
AT1G01860	PF05175
AT1G01880	PF00098
AT1G01900	PF00082
AT1G01910	PF02374
AT1G01910	PF00085
AT1G01920	PF00856
AT1G01930	PF18826
AT1G01940	PF00160
AT1G01950	PF00004
AT1G01950	PF01926
AT1G01970	PF17177
AT1G01980	PF01565
AT1G01990	PF09468
AT1G02000	PF04321
AT1G02010	PF00888
AT1G02010	PF02845
AT1G02010	PF00615
AT1G02010	PF00168
AT1G02020	PF00646
AT1G02020	PF08241
AT1G02030	PF12171
AT1G02040	PF12171
AT1G02050	PF00195
AT1G02060	PF17177
AT1G02065	PF12171
AT1G02065	PF00080
AT1G02067	PF10419
AT1G02070	PF03107
AT1G02090	PF01399
AT1G02100	PF08241
AT1G02110	PF04782
AT1G02120	PF02893
AT1G02130	PF01926
AT1G02140	PF03101
AT1G02145	PF00487
AT1G02145	PF03798
AT1G02150	PF17177
AT1G02160	PF06747
AT1G02160	PF02320
AT1G02170	PF06943
AT1G02180	PF13947
AT1G02190	PF12076
AT1G02205	PF12076
AT1G02210	PF00754
AT1G02220	PF10545
AT1G02230	PF10545
AT1G02250	PF08662
AT1G02260	PF00892
AT1G02270	PF03372
AT1G02270	PF00246
AT1G02280	PF02374
AT1G02290	PF00447
AT1G02300	PF00112
AT1G02305	PF00112
AT1G02310	PF00150
AT1G02320	PF00188
AT1G02330	PF09745
AT1G02335	PF00190
AT1G02340	PF00010
AT1G02350	PF05699
AT1G02360	PF00182
AT1G02370	PF17874
AT1G02380	PF07716
AT1G02390	PF01553
AT1G02400	PF03171
AT1G02405	PF02221
AT1G02410	PF03364
AT1G02420	PF17177
AT1G02430	PF00004
AT1G02440	PF01926
AT1G02450	PF10187
AT1G02460	PF00089
AT1G02470	PF03364
AT1G02475	PF03364
AT1G02490	PF00582
AT1G02500	PF00107
AT1G02510	PF07885
AT1G02530	PF00005
AT1G02540	PF07145
AT1G02550	PF04043
AT1G02560	PF02230
AT1G02570	PF03798
AT1G02575	PF03798
AT1G02580	PF00856
AT1G02580	PF00098
AT1G02590	PF00248
AT1G02610	PF00097
AT1G02610	PF10260
AT1G02620	PF12680
AT1G02630	PF00892
AT1G02640	PF01915
AT1G02650	PF01399
AT1G02660	PF01764
AT1G02670	PF00270
AT1G02670	PF00176
AT1G02680	PF02201
AT1G02690	PF08609
AT1G02700	PF09350
AT1G02705	PF00234
AT1G02710	PF13441
AT1G02720	PF03372
AT1G02730	PF10699
AT1G02740	PF11717
AT1G02750	PF04641
AT1G02750	PF04194
AT1G02770	PF00685
AT1G02780	PF04935
AT1G02790	PF12708
AT1G02800	PF03629
AT1G02810	PF04043
AT1G02813	PF02221
AT1G02816	PF02221
AT1G02820	PF04774
AT1G02830	PF01176
AT1G02840	PF00076
AT1G02850	PF00150
AT1G02860	PF00097
AT1G02860	PF01844
AT1G02870	PF02270
AT1G02880	PF00571
AT1G02880	PF00646
AT1G02890	PF00498
AT1G02900	PF00188
AT1G02910	PF02926
AT1G02920	PF13409
AT1G02930	PF13409
AT1G02940	PF13409
AT1G02950	PF13409
AT1G02950	PF05916
AT1G02960	PF08585
AT1G02960	PF00168
AT1G02960	PF04782
AT1G02960	PF12656
AT1G02960	PF05236
AT1G02965	PF01883
AT1G02970	PF00069	Kinase
AT1G02980	PF00888
AT1G02990	PF14383
AT1G03000	PF00004
AT1G03010	PF00651
AT1G03020	PF00462
AT1G03030	PF00485
AT1G03040	PF00010
AT1G03050	PF07651
AT1G03055	PF13225
AT1G03055	PF05699
AT1G03070	PF00892
AT1G03090	PF00364
AT1G03100	PF17177
AT1G03103	PF00234
AT1G03106	PF14111
AT1G03110	PF08662
AT1G03120	PF04927
AT1G03130	PF00252
AT1G03140	PF02854
AT1G03150	PF05916
AT1G03160	PF00696
AT1G03160	PF01926
AT1G03165	PF04419
AT1G03170	PF11976
AT1G03180	PF00010
AT1G03180	PF03167
AT1G03190	PF04851
AT1G03200	PF00168
AT1G03210	PF03061
AT1G03210	PF08241
AT1G03220	PF14543
AT1G03230	PF14543
AT1G03240	PF00808
AT1G03250	PF13902
AT1G03250	PF13640
AT1G03260	PF00892
AT1G03270	PF00571
AT1G03280	PF08573
AT1G03290	PF16561
AT1G03290	PF12325
AT1G03300	PF05641
AT1G03310	PF00128
AT1G03320	PF09405
AT1G03325	PF06839
AT1G03330	PF01423
AT1G03340	PF02263
AT1G03350	PF12936
AT1G03360	PF15985
AT1G03365	PF00097
AT1G03370	PF00168
AT1G03380	PF10313
AT1G03390	PF03478
AT1G03395	PF00141
AT1G03400	PF03171
AT1G03410	PF03171
AT1G03430	PF05303
AT1G03440	PF01273
AT1G03445	PF00149	Phosphatase
AT1G03457	PF00076
AT1G03470	PF14303
AT1G03475	PF02668
AT1G03490	PF00787
AT1G03495	PF13532
AT1G03510	PF17177
AT1G03520	PF04572
AT1G03520	PF10536
AT1G03530	PF07145
AT1G03540	PF14432
AT1G03550	PF01061
AT1G03550	PF04893
AT1G03550	PF09835
AT1G03550	PF10260
AT1G03560	PF17177
AT1G03590	PF00481	Phosphatase
AT1G03600	PF08718
AT1G03610	PF13532
AT1G03610	PF03987
AT1G03620	PF00042
AT1G03620	PF08511
AT1G03630	PF03446
AT1G03650	PF07727
AT1G03660	PF13962
AT1G03670	PF12796
AT1G03680	PF00085
AT1G03687	PF05641
AT1G03687	PF08652
AT1G03700	PF13664
AT1G03710	PF03101
AT1G03720	PF00112
AT1G03730	PF03151
AT1G03740	PF00069	Kinase
AT1G03750	PF00271
AT1G03760	PF00439
AT1G03770	PF00097
AT1G03780	PF12214
AT1G03790	PF00447
AT1G03800	PF05687
AT1G03810	PF10447
AT1G03820	PF04774
AT1G03830	PF02263
AT1G03840	PF12171
AT1G03850	PF00168
AT1G03850	PF00462
AT1G03850	PF01423
AT1G03860	PF01145
AT1G03870	PF02469
AT1G03880	PF00190
AT1G03890	PF00190
AT1G03900	PF05641
AT1G03905	PF00005
AT1G03910	PF12936
AT1G03910	PF00169
AT1G03920	PF00069	Kinase
AT1G03930	PF00069	Kinase
AT1G03940	PF00089
AT1G03950	PF02037
AT1G03960	PF17958
AT1G03970	PF07716
AT1G03980	PF03104
AT1G03980	PF01852
AT1G03980	PF04406
AT1G03982	PF05627
AT1G03990	PF07992
AT1G04000	PF05678
AT1G04010	PF00150
AT1G04020	PF00097
AT1G04030	PF12656
AT1G04040	PF00704
AT1G04050	PF00856
AT1G04070	PF13456
AT1G04080	PF05843
AT1G04090	PF00168
AT1G04100	PF00168
AT1G04105	PF05678
AT1G04110	PF00082
AT1G04130	PF04212
AT1G04130	PF00439
AT1G04140	PF03478
AT1G04150	PF00168
AT1G04170	PF03143
AT1G04180	PF07992
AT1G04190	PF00650
AT1G04200	PF18137
AT1G04200	PF08389
AT1G04210	PF00069	Kinase
AT1G04220	PF08392
AT1G04230	PF07557
AT1G04240	PF00168
AT1G04250	PF00168
AT1G04260	PF06803
AT1G04270	PF00673
AT1G04270	PF00334
AT1G04280	PF06414
AT1G04290	PF03061
AT1G04300	PF12047
AT1G04300	PF00168
AT1G04300	PF14111
AT1G04300	PF07651
AT1G04300	PF02037
AT1G04310	PF07885
AT1G04330	PF00505
AT1G04340	PF13664
AT1G04350	PF03171
AT1G04360	PF13639
AT1G04370	PF05687
AT1G04380	PF03171
AT1G04390	PF00651
AT1G04400	PF03441
AT1G04410	PF04321
AT1G04420	PF00248
AT1G04430	PF08241
AT1G04440	PF00069	Kinase
AT1G04445	PF05678
AT1G04450	PF04774
AT1G04455	PF05699
AT1G04470	PF02854
AT1G04480	PF17135
AT1G04490	PF00168
AT1G04500	PF00010
AT1G04510	PF04043
AT1G04520	PF14380
AT1G04530	PF02338
AT1G04540	PF00168
AT1G04550	PF12656
AT1G04550	PF10469
AT1G04555	PF05529
AT1G04560	PF13664
AT1G04570	PF00999
AT1G04590	PF02854
AT1G04610	PF07992
AT1G04620	PF00383
AT1G04625	PF13456
AT1G04630	PF01541
AT1G04635	PF02676
AT1G04640	PF00849
AT1G04645	PF00059
AT1G04650	PF10350
AT1G04650	PF08161
AT1G04660	PF13441
AT1G04670	PF00542
AT1G04680	PF00188
AT1G04690	PF00248
AT1G04700	PF00069	Kinase
AT1G04710	PF01180
AT1G04730	PF00004
AT1G04750	PF01105
AT1G04750	PF05008
AT1G04760	PF01105
AT1G04770	PF01399
AT1G04778	PF00631
AT1G04780	PF02037
AT1G04790	PF13639
AT1G04800	PF04774
AT1G04810	PF17781
AT1G04820	PF00091
AT1G04830	PF07842
AT1G04830	PF03732
AT1G04840	PF14432
AT1G04850	PF06391
AT1G04850	PF04696
AT1G04860	PF00443
AT1G04870	PF01852
AT1G04870	PF08241
AT1G04880	PF00505
AT1G04890	PF09745
AT1G04895	PF03159
AT1G04900	PF13649
AT1G04910	PF00685
AT1G04920	PF03104
AT1G04930	PF14364
AT1G04930	PF11976
AT1G04940	PF01794
AT1G04945	PF04438
AT1G04945	PF01753
AT1G04950	PF01743
AT1G04960	PF07889
AT1G04970	PF01273
AT1G04980	PF00085
AT1G04985	PF14159
AT1G04985	PF12656
AT1G04990	PF12171
AT1G04990	PF00076
AT1G04990	PF06747
AT1G05000	PF00782	Phosphatase
AT1G05000	PF00102	Phosphatase
AT1G05000	PF00884
AT1G05005	PF13023
AT1G05010	PF03171
AT1G05020	PF07651
AT1G05030	PF06813
AT1G05035	PF03101
AT1G05040	PF10545
AT1G05055	PF00092
AT1G05060	PF06911
AT1G05065	PF00135
AT1G05070	PF11938
AT1G05080	PF00646
AT1G05085	PF14111
AT1G05087	PF00498
AT1G05087	PF13266
AT1G05090	PF17780
AT1G05100	PF00069	Kinase
AT1G05120	PF00176
AT1G05136	PF00249
AT1G05140	PF13180
AT1G05150	PF17874
AT1G05160	PF01553
AT1G05170	PF00930
AT1G05170	PF00754
AT1G05180	PF13649
AT1G05180	PF01398
AT1G05190	PF00347
AT1G05200	PF00060
AT1G05200	PF01094
AT1G05205	PF13225
AT1G05210	PF00892
AT1G05220	PF00892
AT1G05230	PF00588
AT1G05230	PF00046
AT1G05240	PF00141
AT1G05250	PF00141
AT1G05260	PF00141
AT1G05270	PF00168
AT1G05280	PF01823
AT1G05280	PF04572
AT1G05290	PF08646
AT1G05291	PF00892
AT1G05300	PF01699
AT1G05300	PF00137
AT1G05310	PF01095
AT1G05320	PF08172
AT1G05320	PF12325
AT1G05330	PF00903
AT1G05340	PF06943
AT1G05350	PF00899
AT1G05360	PF14360
AT1G05360	PF00689
AT1G05370	PF14780
AT1G05380	PF00855
AT1G05385	PF13019
AT1G05385	PF09350
AT1G05400	PF01844
AT1G05410	PF01485
AT1G05410	PF00097
AT1G05420	PF00651
AT1G05430	PF13178
AT1G05440	PF00622
AT1G05450	PF10536
AT1G05450	PF00234
AT1G05460	PF13086
AT1G05470	PF00249
AT1G05500	PF00168
AT1G05510	PF00903
AT1G05520	PF00626
AT1G05530	PF00534
AT1G05540	PF03478
AT1G05550	PF00635
AT1G05550	PF02221
AT1G05550	PF03478
AT1G05560	PF06925
AT1G05560	PF00534
AT1G05575	PF05699
AT1G05577	PF00098
AT1G05580	PF00999
AT1G05590	PF00728
AT1G05600	PF17177
AT1G05610	PF00483
AT1G05615	PF00168
AT1G05620	PF00294
AT1G05630	PF08662
AT1G05630	PF12894
AT1G05640	PF00689
AT1G05650	PF12708
AT1G05660	PF12708
AT1G05670	PF17177
AT1G05675	PF00534
AT1G05680	PF00534
AT1G05690	PF00651
AT1G05700	PF00069	Kinase
AT1G05710	PF00010
AT1G05710	PF00631
AT1G05720	PF08806
AT1G05730	PF02953
AT1G05730	PF16860
AT1G05740	PF02953
AT1G05750	PF14432
AT1G05760	PF00190
AT1G05770	PF01103
AT1G05780	PF01699
AT1G05783	PF10545
AT1G05785	PF00892
AT1G05785	PF07786
AT1G05790	PF01764
AT1G05800	PF01764
AT1G05805	PF00010
AT1G05810	PF02223
AT1G05820	PF02225
AT1G05820	PF07884
AT1G05830	PF00856
AT1G05835	PF00234
AT1G05840	PF00026
AT1G05850	PF00182
AT1G05860	PF13891
AT1G05870	PF07802
AT1G05880	PF01485
AT1G05890	PF01485
AT1G05894	PF07839
AT1G05900	PF00730
AT1G05910	PF00004
AT1G05920	PF02362
AT1G05930	PF02362
AT1G05940	PF13906
AT1G05950	PF15612
AT1G05960	PF12717
AT1G05960	PF08167
AT1G05970	PF00635
AT1G05970	PF12923
AT1G05990	PF13499
AT1G06000	PF00534
AT1G06010	PF05678
AT1G06020	PF00294
AT1G06030	PF00294
AT1G06040	PF01844
AT1G06045	PF00808
AT1G06050	PF07059
AT1G06060	PF08718
AT1G06070	PF00170
AT1G06080	PF00487
AT1G06090	PF00487
AT1G06100	PF00487
AT1G06110	PF00646
AT1G06120	PF00487
AT1G06130	PF12706
AT1G06135	PF00141
AT1G06137	PF00188
AT1G06140	PF14432
AT1G06143	PF17177
AT1G06148	PF00505
AT1G06150	PF14215
AT1G06160	PF00615
AT1G06170	PF00010
AT1G06180	PF00249
AT1G06190	PF02179
AT1G06190	PF08790
AT1G06200	PF13023
AT1G06200	PF02201
AT1G06210	PF01417
AT1G06210	PF09177
AT1G06220	PF00501
AT1G06225	PF00505
AT1G06230	PF00439
AT1G06240	PF00730
AT1G06250	PF01764
AT1G06260	PF00112
AT1G06270	PF01399
AT1G06280	PF00188
AT1G06290	PF11838
AT1G06310	PF01756
AT1G06320	PF05699
AT1G06330	PF00403
AT1G06340	PF05641
AT1G06350	PF00487
AT1G06360	PF00487
AT1G06380	PF17903
AT1G06390	PF00069	Kinase
AT1G06400	PF02223
AT1G06410	PF00982
AT1G06420	PF07460
AT1G06420	PF15477
AT1G06430	PF00004
AT1G06440	PF11955
AT1G06450	PF00903
AT1G06460	PF00011
AT1G06470	PF03151
AT1G06475	PF02453
AT1G06500	PF04774
AT1G06510	PF02179
AT1G06515	PF07885
AT1G06520	PF01553
AT1G06530	PF05008
AT1G06540	PF04043
AT1G06550	PF01565
AT1G06560	PF00171
AT1G06570	PF00903
AT1G06570	PF00501
AT1G06580	PF17177
AT1G06590	PF12862
AT1G06620	PF03171
AT1G06630	PF00646
AT1G06640	PF03171
AT1G06645	PF03171
AT1G06650	PF03171
AT1G06660	PF12766
AT1G06680	PF07883
AT1G06680	PF08768
AT1G06690	PF00248
AT1G06700	PF00069	Kinase
AT1G06710	PF17177
AT1G06720	PF00004
AT1G06730	PF00294
AT1G06740	PF02338
AT1G06750	PF06414
AT1G06760	PF03939
AT1G06770	PF00097
AT1G06770	PF00855
AT1G06780	PF01432
AT1G06790	PF03876
AT1G06800	PF01764
AT1G06810	PF06943
AT1G06820	PF01593
AT1G06820	PF03572
AT1G06830	PF00462
AT1G06840	PF00069	Kinase
AT1G06850	PF00170
AT1G06850	PF07716
AT1G06870	PF10502
AT1G06890	PF03151
AT1G06900	PF05193
AT1G06910	PF00249
AT1G06920	PF07839
AT1G06923	PF00319
AT1G06925	PF00501
AT1G06930	PF05678
AT1G06950	PF02518
AT1G06960	PF00076
AT1G06960	PF00505
AT1G06970	PF00999
AT1G06980	PF00319
AT1G06990	PF00657
AT1G07000	PF00888
AT1G07010	PF00149	Phosphatase
AT1G07020	PF13259
AT1G07025	PF01464
AT1G07030	PF00109
AT1G07040	PF00199
AT1G07050	PF12923
AT1G07050	PF10545
AT1G07060	PF00134
AT1G07060	PF00651
AT1G07060	PF08718
AT1G07070	PF01775
AT1G07080	PF01852
AT1G07090	PF00505
AT1G07110	PF01591
AT1G07120	PF03732
AT1G07130	PF00027
AT1G07135	PF02298
AT1G07140	PF03108
AT1G07150	PF00069	Kinase
AT1G07160	PF00481	Phosphatase
AT1G07170	PF06943
AT1G07175	PF04419
AT1G07175	PF00188
AT1G07180	PF07992
AT1G07190	PF00370
AT1G07200	PF07000
AT1G07200	PF07724
AT1G07210	PF04774
AT1G07220	PF05686
AT1G07230	PF00884
AT1G07240	PF00291
AT1G07250	PF03033
AT1G07260	PF00534
AT1G07270	PF00004
AT1G07280	PF00615
AT1G07280	PF02854
AT1G07290	PF16212
AT1G07300	PF00010
AT1G07300	PF03868
AT1G07300	PF00234
AT1G07310	PF00168
AT1G07320	PF15511
AT1G07330	PF02037
AT1G07330	PF14364
AT1G07340	PF06813
AT1G07350	PF00076
AT1G07360	PF00076
AT1G07370	PF00717
AT1G07380	PF00246
AT1G07390	PF00168
AT1G07390	PF12624
AT1G07400	PF00011
AT1G07410	PF02223
AT1G07420	PF00487
AT1G07430	PF00481	Phosphatase
AT1G07440	PF04321
AT1G07440	PF02737
AT1G07450	PF07993
AT1G07460	PF00139
AT1G07470	PF10440
AT1G07473	PF05678
AT1G07476	PF05603
AT1G07480	PF07145
AT1G07485	PF00550
AT1G07490	PF01778
AT1G07500	PF00498
AT1G07510	PF00004
AT1G07520	PF02902
AT1G07520	PF00685
AT1G07530	PF00685
AT1G07540	PF00249
AT1G07550	PF00069	Kinase
AT1G07560	PF00069	Kinase
AT1G07570	PF00069	Kinase
AT1G07590	PF17177
AT1G07600	PF03330
AT1G07610	PF03330
AT1G07615	PF01926
AT1G07620	PF14309
AT1G07630	PF00481	Phosphatase
AT1G07640	PF00098
AT1G07640	PF05678
AT1G07645	PF00903
AT1G07650	PF00069	Kinase
AT1G07660	PF15511
AT1G07670	PF00689
AT1G07680	PF00137
AT1G07690	PF13664
AT1G07690	PF05529
AT1G07700	PF00085
AT1G07705	PF04153
AT1G07710	PF00689
AT1G07720	PF14432
AT1G07725	PF16528
AT1G07730	PF02469
AT1G07740	PF17177
AT1G07745	PF08423
AT1G07747	PF14368
AT1G07750	PF00190
AT1G07770	PF01336
AT1G07780	PF00697
AT1G07780	PF01936
AT1G07790	PF00125
AT1G07795	PF00234
AT1G07810	PF00689
AT1G07820	PF15511
AT1G07830	PF09350
AT1G07840	PF12871
AT1G07840	PF07524
AT1G07850	PF01565
AT1G07860	PF07885
AT1G07870	PF00069	Kinase
AT1G07880	PF00069	Kinase
AT1G07885	PF13976
AT1G07890	PF00141
AT1G07900	PF07743
AT1G07901	PF00327
AT1G07902	PF00327
AT1G07910	PF00567
AT1G07920	PF03143
AT1G07930	PF03143
AT1G07940	PF03143
AT1G07950	PF10241
AT1G07950	PF00210
AT1G07960	PF00085
AT1G07970	PF01852
AT1G07980	PF00808
AT1G07985	PF00472
AT1G07990	PF09759
AT1G08000	PF12171
AT1G08005	PF00076
AT1G08010	PF12171
AT1G08030	PF00615
AT1G08035	PF00089
AT1G08035	PF00234
AT1G08040	PF00150
AT1G08040	PF00685
AT1G08050	PF00092
AT1G08065	PF00754
AT1G08070	PF14432
AT1G08080	PF00754
AT1G08090	PF00909
AT1G08100	PF00909
AT1G08110	PF00903
AT1G08120	PF13867
AT1G08125	PF08241
AT1G08125	PF16035
AT1G08125	PF01467
AT1G08130	PF04675
AT1G08135	PF00999
AT1G08140	PF00999
AT1G08150	PF00999
AT1G08160	PF03168
AT1G08165	PF00505
AT1G08170	PF00635
AT1G08180	PF11976
AT1G08190	PF00780
AT1G08200	PF01370
AT1G08210	PF14543
AT1G08220	PF04755
AT1G08220	PF10469
AT1G08230	PF13906
AT1G08230	PF08627
AT1G08230	PF00892
AT1G08250	PF00596
AT1G08270	PF00542
AT1G08280	PF04572
AT1G08290	PF12171
AT1G08300	PF00644
AT1G08300	PF00169
AT1G08310	PF00561
AT1G08315	PF01138
AT1G08320	PF00170
AT1G08320	PF02582
AT1G08340	PF09468
AT1G08350	PF07786
AT1G08350	PF01061
AT1G08350	PF02225
AT1G08360	PF07106
AT1G08370	PF04652
AT1G08380	PF09835
AT1G08390	PF09346
AT1G08390	PF00646
AT1G08400	PF07842
AT1G08410	PF01926
AT1G08420	PF00149	Phosphatase
AT1G08430	PF00999
AT1G08440	PF00999
AT1G08450	PF03572
AT1G08450	PF04669
AT1G08460	PF00850
AT1G08465	PF00505
AT1G08470	PF03088
AT1G08480	PF02230
AT1G08490	PF00266
AT1G08500	PF02298
AT1G08510	PF07727
AT1G08520	PF17863
AT1G08530	PF07889
AT1G08530	PF02453
AT1G08530	PF07766
AT1G08540	PF10469
AT1G08550	PF07137
AT1G08560	PF10496
AT1G08570	PF00085
AT1G08580	PF04935
AT1G08590	PF00069	Kinase
AT1G08610	PF17177
AT1G08620	PF00855
AT1G08630	PF00155
AT1G08640	PF06916
AT1G08645	PF01336
AT1G08650	PF00069	Kinase
AT1G08660	PF13091
AT1G08660	PF02225
AT1G08660	PF00171
AT1G08670	PF18036
AT1G08670	PF01417
AT1G08680	PF00505
AT1G08695	PF12999
AT1G08700	PF01699
AT1G08710	PF00646
AT1G08720	PF00069	Kinase
AT1G08750	PF01105
AT1G08760	PF08729
AT1G08770	PF00892
AT1G08780	PF03469
AT1G08790	PF00010
AT1G08800	PF00498
AT1G08810	PF00249
AT1G08820	PF00635
AT1G08830	PF00080
AT1G08840	PF13086
AT1G08845	PF00635
AT1G08860	PF00092
AT1G08880	PF00125
AT1G08890	PF01699
AT1G08900	PF01699
AT1G08900	PF06813
AT1G08910	PF10033
AT1G08920	PF01699
AT1G08920	PF06813
AT1G08930	PF06813
AT1G08940	PF01928
AT1G08960	PF01699
AT1G08970	PF00808
AT1G08980	PF01425
AT1G08985	PF01176
AT1G08990	PF04572
AT1G09000	PF00069	Kinase
AT1G09010	PF02836
AT1G09020	PF00571
AT1G09030	PF00808
AT1G09040	PF00855
AT1G09050	PF00855
AT1G09060	PF10497
AT1G09070	PF00168
AT1G09080	PF02782
AT1G09090	PF01794
AT1G09100	PF00004
AT1G09130	PF01435
AT1G09130	PF00218
AT1G09140	PF00076
AT1G09150	PF01248
AT1G09155	PF00168
AT1G09157	PF13962
AT1G09160	PF00481	Phosphatase
AT1G09170	PF00307
AT1G09176	PF00188
AT1G09180	PF00004
AT1G09190	PF14432
AT1G09195	PF17177
AT1G09195	PF02541
AT1G09195	PF14432
AT1G09200	PF00125
AT1G09210	PF13640
AT1G09220	PF00266
AT1G09230	PF00076
AT1G09240	PF08100
AT1G09245	PF00031
AT1G09250	PF00010
AT1G09260	PF00134
AT1G09270	PF00224
AT1G09270	PF01717
AT1G09280	PF00581
AT1G09290	PF02926
AT1G09300	PF00557
AT1G09310	PF01281
AT1G09320	PF05641
AT1G09330	PF02453
AT1G09340	PF01370
AT1G09350	PF01507
AT1G09350	PF03167
AT1G09360	PF00582
AT1G09370	PF04043
AT1G09380	PF08627
AT1G09390	PF00657
AT1G09400	PF00724
AT1G09410	PF14432
AT1G09415	PF10187
AT1G09420	PF00156
AT1G09420	PF00271
AT1G09430	PF01645
AT1G09440	PF00069	Kinase
AT1G09450	PF00069	Kinase
AT1G09460	PF00234
AT1G09470	PF10496
AT1G09470	PF04696
AT1G09480	PF07993
AT1G09483	PF05008
AT1G09490	PF07993
AT1G09500	PF07993
AT1G09510	PF07993
AT1G09520	PF00097
AT1G09530	PF00010
AT1G09540	PF00249
AT1G09550	PF01764
AT1G09560	PF00190
AT1G09570	PF13426
AT1G09570	PF01326
AT1G09575	PF04678
AT1G09580	PF01105
AT1G09590	PF00252
AT1G09600	PF00069	Kinase
AT1G09610	PF04669
AT1G09620	PF00133
AT1G09625	PF06916
AT1G09630	PF02223
AT1G09640	PF13409
AT1G09645	PF05529
AT1G09650	PF00646
AT1G09660	PF00454
AT1G09660	PF00168
AT1G09665	PF00685
AT1G09680	PF17177
AT1G09690	PF00252
AT1G09700	PF00035
AT1G09710	PF00249
AT1G09720	PF00787
AT1G09730	PF04424
AT1G09740	PF00582
AT1G09750	PF14543
AT1G09760	PF12295
AT1G09770	PF00249
AT1G09780	PF01979
AT1G09790	PF07732
AT1G09790	PF00754
AT1G09794	PF16860
AT1G09795	PF00224
AT1G09800	PF00582
AT1G09810	PF03732
AT1G09812	PF08510
AT1G09815	PF01592
AT1G09820	PF17177
AT1G09830	PF01113
AT1G09840	PF00069	Kinase
AT1G09850	PF00112
AT1G09860	PF01699
AT1G09870	PF13640
AT1G09880	PF00754
AT1G09890	PF00251
AT1G09890	PF17137
AT1G09900	PF17177
AT1G09910	PF00754
AT1G09910	PF00251
AT1G09920	PF13639
AT1G09930	PF13906
AT1G09932	PF02602
AT1G09932	PF00248
AT1G09932	PF01648
AT1G09935	PF04824
AT1G09940	PF03446
AT1G09950	PF09468
AT1G09960	PF00909
AT1G09970	PF00069	Kinase
AT1G09980	PF05057
AT1G09995	PF00808
AT1G09995	PF02453
AT1G10000	PF13966
AT1G10010	PF13906
AT1G10020	PF00089
AT1G10030	PF00892
AT1G10040	PF05057
AT1G10050	PF02018
AT1G10060	PF01103
AT1G10060	PF00109
AT1G10060	PF00291
AT1G10070	PF01557
AT1G10090	PF02714
AT1G10095	PF14372
AT1G10095	PF01612
AT1G10100	PF01466
AT1G10110	PF00646
AT1G10120	PF00010
AT1G10130	PF00689
AT1G10140	PF01521
AT1G10150	PF07889
AT1G10155	PF08547
AT1G10170	PF16158
AT1G10180	PF12755
AT1G10190	PF07732
AT1G10200	PF03107
AT1G10200	PF04828
AT1G10210	PF00069	Kinase
AT1G10220	PF00011
AT1G10225	PF07885
AT1G10230	PF01466
AT1G10240	PF03101
AT1G10250	PF00651
AT1G10270	PF17177
AT1G10280	PF04572
AT1G10290	PF00169
AT1G10300	PF01926
AT1G10300	PF00169
AT1G10310	PF03446
AT1G10320	PF00076
AT1G10330	PF17177
AT1G10340	PF00689
AT1G10350	PF01556
AT1G10360	PF13409
AT1G10370	PF13409
AT1G10380	PF14380
AT1G10385	PF16528
AT1G10390	PF00076
AT1G10395	PF00505
AT1G10400	PF00534
AT1G10410	PF07059
AT1G10417	PF16421
AT1G10417	PF10496
AT1G10430	PF00149	Phosphatase
AT1G10450	PF00439
AT1G10450	PF00615
AT1G10455	PF18036
AT1G10460	PF00190
AT1G10470	PF00571
AT1G10470	PF00808
AT1G10470	PF00582
AT1G10480	PF02892
AT1G10490	PF00271
AT1G10500	PF01521
AT1G10510	PF00724
AT1G10520	PF00567
AT1G10520	PF00069	Kinase
AT1G10522	PF03364
AT1G10530	PF00472
AT1G10540	PF00361
AT1G10540	PF00999
AT1G10550	PF00026
AT1G10560	PF12796
AT1G10570	PF02902
AT1G10580	PF08662
AT1G10585	PF00010
AT1G10585	PF00027
AT1G10586	PF00010
AT1G10586	PF01627
AT1G10588	PF00234
AT1G10590	PF01176
AT1G10600	PF01398
AT1G10600	PF02221
AT1G10610	PF06839
AT1G10610	PF02926
AT1G10610	PF00010
AT1G10620	PF00069	Kinase
AT1G10630	PF00005
AT1G10640	PF12708
AT1G10650	PF00097
AT1G10650	PF14634
AT1G10657	PF13966
AT1G10660	PF03798
AT1G10670	PF03460
AT1G10680	PF00005
AT1G10690	PF13881
AT1G10700	PF00156
AT1G10700	PF01087
AT1G10710	PF02893
AT1G10715	PF00097
AT1G10717	PF00234
AT1G10720	PF07962
AT1G10730	PF00168
AT1G10740	PF00561
AT1G10745	PF05617
AT1G10747	PF01753
AT1G10750	PF00059
AT1G10750	PF00754
AT1G10770	PF04043
AT1G10780	PF00646
AT1G10790	PF03168
AT1G10800	PF06803
AT1G10800	PF01699
AT1G10810	PF00248
AT1G10820	PF00249
AT1G10830	PF07298
AT1G10830	PF01699
AT1G10840	PF01398
AT1G10840	PF05916
AT1G10850	PF00069	Kinase
AT1G10865	PF02953
AT1G10865	PF02320
AT1G10870	PF00169
AT1G10875	PF14303
AT1G10880	PF00685
AT1G10890	PF07716
AT1G10900	PF00168
AT1G10910	PF17177
AT1G10920	PF00931
AT1G10930	PF00270
AT1G10940	PF00069	Kinase
AT1G10950	PF00497
AT1G10960	PF00111
AT1G10970	PF01699
AT1G10980	PF02225
AT1G10990	PF05678
AT1G10990	PF08510
AT1G11000	PF13968
AT1G11020	PF13639
AT1G11040	PF01556
AT1G11050	PF00069	Kinase
AT1G11060	PF07814
AT1G11070	PF02854
AT1G11070	PF00307
AT1G11080	PF00704
AT1G11090	PF00561
AT1G11100	PF13086
AT1G11100	PF00270
AT1G11100	PF00176
AT1G11110	PF01172
AT1G11110	PF01814
AT1G11112	PF10545
AT1G11120	PF03168
AT1G11120	PF02298
AT1G11125	PF05678
AT1G11130	PF00069	Kinase
AT1G11145	PF01423
AT1G11160	PF13925
AT1G11170	PF14111
AT1G11170	PF00704
AT1G11170	PF12776
AT1G11170	PF00168
AT1G11180	PF01061
AT1G11190	PF00188
AT1G11200	PF06454
AT1G11210	PF14364
AT1G11220	PF14364
AT1G11230	PF14364
AT1G11240	PF04419
AT1G11250	PF05008
AT1G11260	PF06813
AT1G11270	PF00646
AT1G11280	PF00069	Kinase
AT1G11290	PF14432
AT1G11300	PF00069	Kinase
AT1G11303	PF00069	Kinase
AT1G11310	PF01794
AT1G11310	PF02453
AT1G11310	PF06454
AT1G11320	PF02668
AT1G11330	PF00069	Kinase
AT1G11340	PF00069	Kinase
AT1G11350	PF00069	Kinase
AT1G11360	PF00582
AT1G11362	PF04043
AT1G11370	PF01095
AT1G11380	PF07884
AT1G11390	PF01435
AT1G11400	PF10252
AT1G11410	PF00069	Kinase
AT1G11420	PF05641
AT1G11430	PF06094
AT1G11440	PF17780
AT1G11450	PF00892
AT1G11450	PF08627
AT1G11460	PF00892
AT1G11470	PF13456
AT1G11475	PF01844
AT1G11480	PF13266
AT1G11490	PF01823
AT1G11500	PF13962
AT1G11510	PF00249
AT1G11520	PF00707
AT1G11530	PF00085
AT1G11540	PF02683
AT1G11540	PF01699
AT1G11545	PF00059
AT1G11560	PF02453
AT1G11570	PF00089
AT1G11570	PF00026
AT1G11572	PF00234
AT1G11580	PF04043
AT1G11590	PF04043
AT1G11591	PF10469
AT1G11593	PF04043
AT1G11600	PF01553
AT1G11608	PF00089
AT1G11610	PF00144
AT1G11620	PF00646
AT1G11630	PF17177
AT1G11650	PF00076
AT1G11655	PF17135
AT1G11660	PF00271
AT1G11660	PF02037
AT1G11670	PF13906
AT1G11680	PF00685
AT1G11684	PF00149	Phosphatase
AT1G11690	PF03469
AT1G11700	PF13259
AT1G11710	PF17177
AT1G11720	PF00534
AT1G11720	PF08323
AT1G11730	PF01094
AT1G11740	PF01852
AT1G11750	PF03358
AT1G11750	PF01343
AT1G11755	PF00582
AT1G11760	PF00550
AT1G11765	PF02298
AT1G11770	PF01565
AT1G11780	PF13532
AT1G11785	PF03168
AT1G11790	PF10469
AT1G11790	PF02602
AT1G11800	PF00567
AT1G11810	PF00646
AT1G11820	PF02469
AT1G11840	PF00903
AT1G11850	PF13441
AT1G11860	PF02784
AT1G11860	PF01571
AT1G11870	PF13023
AT1G11870	PF00557
AT1G11870	PF13691
AT1G11870	PF01416
AT1G11870	PF00334
AT1G11880	PF03798
AT1G11890	PF01105
AT1G11900	PF00651
AT1G11905	PF05529
AT1G11910	PF00026
AT1G11915	PF13947
AT1G11920	PF12708
AT1G11925	PF00188
AT1G11930	PF01168
AT1G11940	PF03016
AT1G11940	PF01553
AT1G11950	PF10497
AT1G11960	PF01435
AT1G11970	PF02037
AT1G11980	PF11976
AT1G11990	PF00168
AT1G12000	PF00365
AT1G12010	PF03171
AT1G12020	PF02320
AT1G12030	PF09412
AT1G12040	PF02469
AT1G12050	PF00483
AT1G12060	PF00170
AT1G12064	PF13639
AT1G12070	PF00168
AT1G12080	PF00403
AT1G12080	PF02037
AT1G12090	PF14547
AT1G12100	PF14547
AT1G12110	PF06813
AT1G12120	PF15511
AT1G12130	PF01593
AT1G12140	PF01593
AT1G12150	PF08172
AT1G12160	PF07992
AT1G12170	PF00646
AT1G12180	PF00754
AT1G12190	PF00646
AT1G12200	PF01593
AT1G12210	PF00931
AT1G12211	PF06839
AT1G12220	PF00931
AT1G12230	PF00497
AT1G12230	PF13355
AT1G12240	PF00251
AT1G12244	PF00497
AT1G12250	PF04043
AT1G12250	PF00141
AT1G12260	PF10545
AT1G12270	PF00505
AT1G12280	PF00931
AT1G12290	PF00931
AT1G12300	PF17177
AT1G12310	PF00042
AT1G12320	PF00582
AT1G12330	PF00856
AT1G12340	PF03798
AT1G12350	PF00271
AT1G12360	PF00888
AT1G12370	PF00685
AT1G12380	PF05699
AT1G12390	PF05529
AT1G12400	PF05699
AT1G12410	PF00248
AT1G12411	PF00171
AT1G12420	PF00271
AT1G12430	PF00004
AT1G12440	PF08790
AT1G12450	PF03151
AT1G12460	PF00069	Kinase
AT1G12470	PF05131
AT1G12480	PF03798
AT1G12490	PF07734
AT1G12500	PF03151
AT1G12520	PF00403
AT1G12520	PF00857
AT1G12530	PF07106
AT1G12540	PF00010
AT1G12550	PF00389
AT1G12560	PF03330
AT1G12570	PF05199
AT1G12580	PF00069	Kinase
AT1G12600	PF03151
AT1G12610	PF04266
AT1G12615	PF02469
AT1G12620	PF17177
AT1G12630	PF05687
AT1G12640	PF01794
AT1G12650	PF08698
AT1G12660	PF05617
AT1G12663	PF00234
AT1G12665	PF00234
AT1G12672	PF04438
AT1G12672	PF00234
AT1G12680	PF00069	Kinase
AT1G12700	PF17177
AT1G12710	PF00646
AT1G12730	PF03798
AT1G12740	PF00144
AT1G12740	PF01094
AT1G12740	PF01435
AT1G12740	PF01593
AT1G12750	PF01061
AT1G12750	PF00690
AT1G12750	PF00999
AT1G12760	PF13639
AT1G12770	PF00270
AT1G12775	PF17177
AT1G12780	PF04321
AT1G12790	PF01734
AT1G12800	PF00567
AT1G12805	PF00462
AT1G12810	PF10172
AT1G12820	PF18511
AT1G12830	PF08574
AT1G12840	PF17171
AT1G12845	PF00234
AT1G12850	PF12928
AT1G12855	PF00646
AT1G12860	PF00010
AT1G12870	PF00646
AT1G12880	PF00293
AT1G12890	PF05678
AT1G12900	PF02800
AT1G12910	PF08662
AT1G12920	PF00092
AT1G12930	PF08389
AT1G12940	PF00909
AT1G12950	PF13906
AT1G12960	PF03719
AT1G12970	PF12295
AT1G12980	PF00188
AT1G12990	PF00685
AT1G13000	PF05686
AT1G13000	PF00685
AT1G13020	PF04774
AT1G13030	PF15862
AT1G13040	PF17177
AT1G13050	PF03168
AT1G13060	PF00704
AT1G13080	PF06974
AT1G13080	PF01743
AT1G13090	PF00168
AT1G13090	PF02889
AT1G13100	PF06974
AT1G13110	PF01273
AT1G13120	PF09763
AT1G13130	PF00150
AT1G13140	PF03364
AT1G13140	PF00646
AT1G13143	PF13456
AT1G13150	PF01852
AT1G13160	PF02854
AT1G13170	PF00169
AT1G13180	PF02782
AT1G13190	PF00076
AT1G13195	PF13639
AT1G13200	PF00646
AT1G13210	PF16212
AT1G13220	PF09325
AT1G13220	PF00307
AT1G13230	PF01273
AT1G13245	PF00010
AT1G13250	PF04572
AT1G13260	PF02362
AT1G13270	PF00557
AT1G13280	PF00254
AT1G13290	PF12171
AT1G13300	PF00249
AT1G13310	PF01399
AT1G13320	PF12755
AT1G13330	PF07106
AT1G13340	PF07524
AT1G13350	PF00069	Kinase
AT1G13360	PF05678
AT1G13360	PF06003
AT1G13370	PF00125
AT1G13380	PF13664
AT1G13390	PF05678
AT1G13400	PF12171
AT1G13410	PF14432
AT1G13420	PF00685
AT1G13430	PF00685
AT1G13440	PF02800
AT1G13450	PF00249
AT1G13450	PF10545
AT1G13460	PF01743
AT1G13470	PF11926
AT1G13480	PF11926
AT1G13485	PF02201
AT1G13490	PF00626
AT1G13500	PF00112
AT1G13510	PF05641
AT1G13520	PF11926
AT1G13530	PF04828
AT1G13540	PF05641
AT1G13550	PF00168
AT1G13560	PF01061
AT1G13560	PF00892
AT1G13570	PF00646
AT1G13580	PF03798
AT1G13590	PF02320
AT1G13600	PF07716
AT1G13605	PF14368
AT1G13607	PF00234
AT1G13608	PF05529
AT1G13609	PF00234
AT1G13609	PF05529
AT1G13610	PF00561
AT1G13610	PF00326
AT1G13620	PF14364
AT1G13620	PF08648
AT1G13630	PF17177
AT1G13630	PF14432
AT1G13635	PF00076
AT1G13640	PF00454
AT1G13650	PF10252
AT1G13670	PF12214
AT1G13680	PF00150
AT1G13690	PF00076
AT1G13700	PF01182
AT1G13710	PF00571
AT1G13730	PF00076
AT1G13740	PF12656
AT1G13750	PF00149	Phosphatase
AT1G13755	PF00234
AT1G13760	PF00097
AT1G13770	PF13968
AT1G13770	PF06472
AT1G13770	PF14237
AT1G13780	PF00646
AT1G13790	PF03468
AT1G13800	PF17177
AT1G13805	PF00271
AT1G13810	PF09588
AT1G13820	PF00561
AT1G13825	PF12680
AT1G13825	PF03171
AT1G13830	PF00234
AT1G13830	PF00024
AT1G13860	PF13649
AT1G13870	PF06414
AT1G13880	PF00102	Phosphatase
AT1G13880	PF00059
AT1G13890	PF02179
AT1G13900	PF00149	Phosphatase
AT1G13910	PF00497
AT1G13910	PF01273
AT1G13920	PF03763
AT1G13920	PF12656
AT1G13920	PF00505
AT1G13930	PF04927
AT1G13940	PF14383
AT1G13950	PF01287
AT1G13960	PF00011
AT1G13960	PF09816
AT1G13970	PF07059
AT1G13990	PF00076
AT1G13990	PF00615
AT1G13990	PF07724
AT1G14000	PF00069	Kinase
AT1G14010	PF01105
AT1G14020	PF00685
AT1G14030	PF09273
AT1G14040	PF14703
AT1G14048	PF07802
AT1G14060	PF07802
AT1G14080	PF00102	Phosphatase
AT1G14100	PF00685
AT1G14110	PF00685
AT1G14120	PF03171
AT1G14130	PF03171
AT1G14140	PF00814
AT1G14150	PF00210
AT1G14150	PF03732
AT1G14160	PF03151
AT1G14170	PF00571
AT1G14170	PF17855
AT1G14170	PF00224
AT1G14180	PF13639
AT1G14185	PF00890
AT1G14190	PF00890
AT1G14200	PF13639
AT1G14205	PF00635
AT1G14210	PF03024
AT1G14220	PF00657
AT1G14230	PF01103
AT1G14240	PF01593
AT1G14250	PF01103
AT1G14260	PF13639
AT1G14270	PF01699
AT1G14270	PF00892
AT1G14280	PF09133
AT1G14290	PF00487
AT1G14300	PF00307
AT1G14300	PF12717
AT1G14310	PF09588
AT1G14315	PF07734
AT1G14315	PF00646
AT1G14320	PF00252
AT1G14320	PF00271
AT1G14330	PF08662
AT1G14340	PF00076
AT1G14345	PF03168
AT1G14350	PF00249
AT1G14350	PF10545
AT1G14360	PF00909
AT1G14370	PF00069	Kinase
AT1G14380	PF13178
AT1G14390	PF00069	Kinase
AT1G14400	PF00884
AT1G14410	PF03364
AT1G14420	PF12708
AT1G14430	PF09118
AT1G14440	PF10453
AT1G14450	PF00690
AT1G14450	PF06916
AT1G14453	PF00168
AT1G14455	PF00234
AT1G14460	PF00004
AT1G14470	PF17177
AT1G14480	PF13962
AT1G14480	PF00571
AT1G14490	PF03876
AT1G14490	PF05678
AT1G14500	PF00571
AT1G14510	PF00439
AT1G14520	PF00149	Phosphatase
AT1G14520	PF00133
AT1G14530	PF06454
AT1G14540	PF00141
AT1G14550	PF00141
AT1G14560	PF00144
AT1G14560	PF01137
AT1G14570	PF16561
AT1G14580	PF12171
AT1G14580	PF00447
AT1G14590	PF04572
AT1G14600	PF00249
AT1G14610	PF00133
AT1G14620	PF00293
AT1G14620	PF00439
AT1G14630	PF00011
AT1G14630	PF14215
AT1G14640	PF16282
AT1G14642	PF00234
AT1G14650	PF08729
AT1G14660	PF00999
AT1G14670	PF00060
AT1G14680	PF06148
AT1G14685	PF12656
AT1G14686	PF01399
AT1G14687	PF06839
AT1G14688	PF00689
AT1G14690	PF08573
AT1G14700	PF00149	Phosphatase
AT1G14710	PF01852
AT1G14720	PF00139
AT1G14730	PF00892
AT1G14740	PF10497
AT1G14750	PF00134
AT1G14755	PF05617
AT1G14760	PF02845
AT1G14760	PF05303
AT1G14760	PF16740
AT1G14770	PF09759
AT1G14780	PF01823
AT1G14790	PF00780
AT1G14800	PF00271
AT1G14810	PF02800
AT1G14810	PF13460
AT1G14820	PF02602
AT1G14820	PF00650
AT1G14830	PF00271
AT1G14840	PF08172
AT1G14860	PF00293
AT1G14870	PF01485
AT1G14870	PF03107
AT1G14880	PF01485
AT1G14890	PF04043
AT1G14900	PF00011
AT1G14910	PF07651
AT1G14920	PF02784
AT1G14930	PF00407
AT1G14940	PF00407
AT1G14950	PF00407
AT1G14960	PF00407
AT1G14970	PF09258
AT1G14970	PF00685
AT1G14980	PF00364
AT1G14980	PF02823
AT1G14990	PF00188
AT1G14990	PF01625
AT1G15000	PF00561
AT1G15010	PF13456
AT1G15015	PF00646
AT1G15020	PF00085
AT1G15030	PF03987
AT1G15030	PF12928
AT1G15040	PF00117
AT1G15050	PF05641
AT1G15050	PF01541
AT1G15060	PF00561
AT1G15080	PF14360
AT1G15085	PF00808
AT1G15100	PF13639
AT1G15110	PF14360
AT1G15110	PF13968
AT1G15120	PF02320
AT1G15125	PF00135
AT1G15125	PF00657
AT1G15130	PF07651
AT1G15140	PF00175
AT1G15150	PF00361
AT1G15150	PF00892
AT1G15160	PF13906
AT1G15165	PF13966
AT1G15170	PF00361
AT1G15180	PF00361
AT1G15180	PF00999
AT1G15190	PF00646
AT1G15200	PF04696
AT1G15200	PF00076
AT1G15215	PF12766
AT1G15215	PF05641
AT1G15220	PF03167
AT1G15230	PF00581
AT1G15240	PF00787
AT1G15250	PF00098
AT1G15260	PF05486
AT1G15270	PF10187
AT1G15280	PF09405
AT1G15310	PF06414
AT1G15320	PF08609
AT1G15330	PF00571
AT1G15340	PF00855
AT1G15350	PF13259
AT1G15360	PF05703
AT1G15370	PF14111
AT1G15380	PF00903
AT1G15385	PF04419
AT1G15390	PF10469
AT1G15400	PF04774
AT1G15400	PF08648
AT1G15400	PF04419
AT1G15410	PF02926
AT1G15415	PF12656
AT1G15420	PF04003
AT1G15420	PF07814
AT1G15430	PF01753
AT1G15440	PF04003
AT1G15460	PF00955
AT1G15470	PF08662
AT1G15480	PF17177
AT1G15490	PF00561
AT1G15500	PF00361
AT1G15510	PF14432
AT1G15530	PF00069	Kinase
AT1G15540	PF03171
AT1G15550	PF03171
AT1G15570	PF00134
AT1G15580	PF00168
AT1G15590	PF02453
AT1G15600	PF13962
AT1G15610	PF13962
AT1G15620	PF03798
AT1G15625	PF03798
AT1G15630	PF04893
AT1G15640	PF03798
AT1G15660	PF00439
AT1G15670	PF00646
AT1G15680	PF00646
AT1G15690	PF00909
AT1G15690	PF13906
AT1G15700	PF00254
AT1G15710	PF03446
AT1G15720	PF00249
AT1G15730	PF02492
AT1G15740	PF00931
AT1G15750	PF08662
AT1G15757	PF05617
AT1G15760	PF00169
AT1G15770	PF00010
AT1G15772	PF03732
AT1G15790	PF16987
AT1G15800	PF07716
AT1G15810	PF09350
AT1G15820	PF00561
AT1G15825	PF05678
AT1G15830	PF00089
AT1G15840	PF04774
AT1G15850	PF13259
AT1G15860	PF10075
AT1G15870	PF03364
AT1G15880	PF09177
AT1G15885	PF00462
AT1G15890	PF00931
AT1G15900	PF13664
AT1G15910	PF03468
AT1G15920	PF04909
AT1G15930	PF01248
AT1G15940	PF12348
AT1G15950	PF07993
AT1G15950	PF01370
AT1G15960	PF00999
AT1G15970	PF02902
AT1G15980	PF01575
AT1G15990	PF00027
AT1G16000	PF00102	Phosphatase
AT1G16010	PF07651
AT1G16020	PF00128
AT1G16020	PF07727
AT1G16020	PF00481	Phosphatase
AT1G16022	PF00127
AT1G16025	PF00319
AT1G16030	PF02782
AT1G16040	PF00892
AT1G16040	PF00909
AT1G16040	PF00361
AT1G16060	PF10545
AT1G16060	PF09811
AT1G16060	PF00188
AT1G16060	PF10440
AT1G16070	PF01167
AT1G16070	PF00622
AT1G16080	PF03446
AT1G16090	PF14543
AT1G16110	PF00069	Kinase
AT1G16120	PF00069	Kinase
AT1G16130	PF00069	Kinase
AT1G16150	PF00069	Kinase
AT1G16160	PF00069	Kinase
AT1G16170	PF02453
AT1G16180	PF06454
AT1G16190	PF11976
AT1G16210	PF06991
AT1G16220	PF00481	Phosphatase
AT1G16225	PF05008
AT1G16225	PF04182
AT1G16230	PF02861
AT1G16240	PF05008
AT1G16240	PF00244
AT1G16250	PF00646
AT1G16260	PF00069	Kinase
AT1G16270	PF00069	Kinase
AT1G16280	PF00270
AT1G16290	PF03441
AT1G16300	PF02800
AT1G16310	PF16916
AT1G16320	PF00650
AT1G16330	PF00134
AT1G16340	PF00793
AT1G16350	PF00478
AT1G16360	PF03168
AT1G16370	PF06813
AT1G16380	PF00999
AT1G16390	PF06813
AT1G16400	PF00497
AT1G16410	PF00497
AT1G16420	PF00271
AT1G16430	PF16740
AT1G16440	PF00069	Kinase
AT1G16445	PF00107
AT1G16460	PF00581
AT1G16470	PF00107
AT1G16480	PF14432
AT1G16490	PF00249
AT1G16500	PF08646
AT1G16510	PF00190
AT1G16515	PF00076
AT1G16515	PF00160
AT1G16520	PF07557
AT1G16530	PF00248
AT1G16540	PF00266
AT1G16560	PF03798
AT1G16570	PF00534
AT1G16590	PF13716
AT1G16610	PF00076
AT1G16630	PF04695
AT1G16640	PF02362
AT1G16650	PF13679
AT1G16670	PF00069	Kinase
AT1G16680	PF01753
AT1G16690	PF00535
AT1G16700	PF00111
AT1G16705	PF00010
AT1G16720	PF00696
AT1G16730	PF04927
AT1G16740	PF00125
AT1G16750	PF01399
AT1G16750	PF16528
AT1G16760	PF00069	Kinase
AT1G16770	PF12656
AT1G16770	PF02270
AT1G16770	PF01928
AT1G16780	PF13906
AT1G16790	PF00125
AT1G16810	PF06991
AT1G16820	PF07727
AT1G16820	PF14244
AT1G16820	PF01471
AT1G16825	PF02453
AT1G16830	PF14432
AT1G16840	PF13259
AT1G16840	PF03364
AT1G16850	PF00188
AT1G16860	PF03168
AT1G16870	PF00176
AT1G16880	PF00092
AT1G16880	PF11976
AT1G16890	PF00307
AT1G16890	PF01466
AT1G16900	PF00615
AT1G16905	PF00026
AT1G16910	PF06839
AT1G16916	PF00505
AT1G16916	PF12656
AT1G16920	PF02223
AT1G16930	PF00646
AT1G16940	PF00646
AT1G16945	PF00646
AT1G16950	PF00234
AT1G16960	PF16455
AT1G16970	PF02037
AT1G16980	PF00982
AT1G17000	PF00982
AT1G17010	PF03171
AT1G17020	PF03171
AT1G17030	PF00754
[truncated: 30,602 more rows]
