# Supplementary material for: Functional annotation of proteins for signaling network inference in non-model species
Source: Research Square preprint supplement (doi:10.21203/rs.3.rs-2201240/v1), 2022-11-11
Supplement: Supplementary file 5 [file 9d164b53af9a691c0984f7a5.xlsx]

## Sheet: Blad1
Supplementary Table S2 - Overview of the 996 protein families with their respective precision, recall, f1-score, and number of sequences in the test dataset.
Pfam	ID	Description	Integer	precision	recall	f1-score	support
PF00004	AAA	ATPase family associated with various cellular activities (AAA)	0	0.88	0.924	0.901	10026
PF00005	ABC_tran	ABC transporter	1	0.998	0.997	0.998	92946
PF00006	ATP-synt_ab	ATP synthase alpha/beta family, nucleotide-binding domain	2	0.947	0.944	0.946	1776
PF00010	HLH	Helix-loop-helix DNA-binding domain	3	0.966	0.976	0.971	8832
PF00011	HSP20	Hsp20/alpha crystallin family	4	0.925	0.947	0.936	4164
PF00016	RuBisCO_large	Ribulose bisphosphate carboxylase large chain, catalytic domain	5	0.944	0.859	0.899	396
PF00024	PAN_1	PAN domain	6	0.513	0.55	0.531	660
PF00026	Asp	Eukaryotic aspartyl protease	7	0.786	0.824	0.805	1686
PF00027	cNMP_binding	Cyclic nucleotide-binding domain	8	0.931	0.959	0.944	8364
PF00031	Cystatin	Cystatin domain	9	0.78	0.822	0.8	534
PF00035	dsrm	Double-stranded RNA binding motif	10	0.797	0.809	0.803	1260
PF00042	Globin	Globin	11	0.714	0.715	0.714	852
PF00046	Homeodomain	Homeodomain	12	0.979	0.977	0.978	7962
PF00056	Ldh_1_N	lactate/malate dehydrogenase, NAD binding domain	13	0.689	0.37	0.481	192
PF00059	Lectin_C	Lectin C-type domain	14	0.847	0.929	0.886	3942
PF00060	Lig_chan	Ligand-gated ion channel	15	0.71	0.782	0.745	354
PF00069	Pkinase	Protein kinase domain	16	0.991	0.995	0.993	79278
PF00076	RRM_1	RNA recognition motif. (a.k.a. RRM, RBD, or RNP domain)	17	0.971	0.981	0.976	24402
PF00080	Sod_Cu	Copper/zinc superoxide dismutase (SODC)	18	0.926	0.917	0.921	1020
PF00082	Peptidase_S8	Subtilase family	19	0.922	0.945	0.934	6414
PF00085	Thioredoxin	Thioredoxin	20	0.946	0.959	0.952	7932
PF00089	Trypsin	Trypsin	21	0.928	0.956	0.942	8784
PF00091	Tubulin	Tubulin/FtsZ family, GTPase domain	22	0.955	0.952	0.954	1890
PF00092	VWA	von Willebrand factor type A domain	23	0.949	0.955	0.952	5676
PF00097	zf-C3HC4	Zinc finger, C3HC4 type (RING finger)	24	0.832	0.919	0.873	3474
PF00098	zf-CCHC	Zinc knuckle	25	0.882	0.949	0.914	3576
PF00102	Y_phosphatase	Protein-tyrosine phosphatase	26	0.921	0.837	0.877	2514
PF00107	ADH_zinc_N	Zinc-binding dehydrogenase	27	0.974	0.989	0.982	17622
PF00108	Thiolase_N	Thiolase, N-terminal domain	28	0.625	0.417	0.5	168
PF00109	ketoacyl-synt	Beta-ketoacyl synthase, N-terminal domain	29	0.893	0.931	0.912	3324
PF00111	Fer2	2Fe-2S iron-sulfur cluster binding domain	30	0.976	0.991	0.983	5868
PF00112	Peptidase_C1	Papain family cysteine protease	31	0.878	0.889	0.884	2760
PF00117	GATase	Glutamine amidotransferase class-I	32	0.982	0.976	0.979	7362
PF00125	Histone	Core histone H2A/H2B/H3/H4	33	0.933	0.918	0.925	1656
PF00127	Copper-bind	Copper binding proteins, plastocyanin/azurin family	34	0.841	0.835	0.838	792
PF00128	Alpha-amylase	Alpha amylase, catalytic domain	35	0.974	0.969	0.971	7818
PF00133	tRNA-synt_1	tRNA synthetases class I (I, L, M and V)	36	0.88	0.883	0.882	1476
PF00134	Cyclin_N	Cyclin, N-terminal domain	37	0.877	0.949	0.911	4458
PF00135	COesterase	Carboxylesterase family	38	0.877	0.908	0.892	6102
PF00137	ATP-synt_C	ATP synthase subunit C	39	0.983	0.985	0.984	2244
PF00139	Lectin_legB	Legume lectin domain	40	0.771	0.583	0.664	288
PF00141	peroxidase	Peroxidase	41	0.94	0.943	0.942	3690
PF00144	Beta-lactamase	Beta-lactamase	42	0.947	0.962	0.954	6786
PF00149	Metallophos	Calcineurin-like phosphoesterase	43	0.983	0.985	0.984	16092
PF00150	Cellulase	Cellulase (glycosyl hydrolase family 5)	44	0.875	0.905	0.89	3258
PF00155	Aminotran_1_2	Aminotransferase class I and II	45	0.954	0.969	0.962	19374
PF00156	Pribosyltran	Phosphoribosyl transferase domain	46	0.987	0.99	0.989	10842
PF00160	Pro_isomerase	Cyclophilin type peptidyl-prolyl cis-trans isomerase/CLD	47	0.977	0.96	0.968	5424
PF00168	C2	C2 domain	48	0.788	0.896	0.839	7452
PF00169	PH	PH domain	49	0.939	0.962	0.95	7896
PF00170	bZIP_1	bZIP transcription factor	50	0.797	0.715	0.754	882
PF00171	Aldedh	Aldehyde dehydrogenase family	51	0.948	0.979	0.963	16458
PF00174	Oxidored_molyb	Oxidoreductase molybdopterin binding domain	52	0.94	0.935	0.937	1890
PF00175	NAD_binding_1	Oxidoreductase NAD-binding domain	53	0.973	0.955	0.964	3540
PF00176	SNF2_N	SNF2 family N-terminal domain	54	0.699	0.451	0.548	510
PF00180	Iso_dh	Isocitrate/isopropylmalate dehydrogenase	55	0.982	0.961	0.972	3996
PF00182	Glyco_hydro_19	Chitinase class I	56	0.763	0.799	0.781	606
PF00188	CAP	Cysteine-rich secretory protein family	57	0.811	0.868	0.839	3564
PF00189	Ribosomal_S3_C	Ribosomal protein S3, C-terminal domain	58	0.988	0.98	0.984	1482
PF00190	Cupin_1	Cupin	59	0.807	0.839	0.823	3054
PF00195	Chal_sti_synt_N	Chalcone and stilbene synthases, N-terminal domain	60	0.81	0.671	0.734	210
PF00198	2-oxoacid_dh	2-oxoacid dehydrogenases acyltransferase (catalytic domain)	61	0.785	0.67	0.723	300
PF00199	Catalase	Catalase	62	0.948	0.935	0.942	1734
PF00210	Ferritin	Ferritin-like domain	63	0.922	0.954	0.938	2922
PF00215	OMPdecase	Orotidine 5'-phosphate decarboxylase / HUMPS family	64	0.926	0.937	0.931	1572
PF00218	IGPS	Indole-3-glycerol phosphate synthase	65	0.973	0.943	0.957	1098
PF00224	PK	Pyruvate kinase, barrel domain	66	0.676	0.541	0.601	270
PF00234	Tryp_alpha_amyl	Protease inhibitor/seed storage/LTP family	67	0.795	0.966	0.872	1050
PF00244	14-3-3	14-3-3 protein	68	0.953	0.937	0.945	882
PF00246	Peptidase_M14	Zinc carboxypeptidase	69	0.929	0.894	0.911	2910
PF00248	Aldo_ket_red	Aldo/keto reductase family	70	0.946	0.978	0.962	13746
PF00249	Myb_DNA-binding	Myb-like DNA-binding domain	71	0.959	0.973	0.966	8496
PF00251	Glyco_hydro_32N	Glycosyl hydrolases family 32 N-terminal domain	72	0.84	0.893	0.866	1470
PF00252	Ribosomal_L16	Ribosomal protein L16p/L10e	73	0.95	0.97	0.96	1692
PF00254	FKBP_C	FKBP-type peptidyl-prolyl cis-trans isomerase	74	0.953	0.953	0.953	5250
PF00266	Aminotran_5	Aminotransferase class-V	75	0.968	0.916	0.941	8400
PF00270	DEAD	DEAD/DEAH box helicase	76	0.684	0.631	0.657	1302
PF00271	Helicase_C	Helicase conserved C-terminal domain	77	0.533	0.59	0.56	2094
PF00275	EPSP_synthase	EPSP synthase (3-phosphoshikimate 1-carboxyvinyltransferase)	78	0.98	0.978	0.979	2826
PF00288	GHMP_kinases_N	GHMP kinases N terminal domain	79	0.975	0.981	0.978	4140
PF00291	PALP	Pyridoxal-phosphate dependent enzyme	80	0.971	0.978	0.975	10056
PF00293	NUDIX	NUDIX domain	81	0.991	0.992	0.992	14970
PF00294	PfkB	pfkB family carbohydrate kinase	82	0.967	0.971	0.969	8934
PF00303	Thymidylat_synt	Thymidylate synthase	83	0.953	0.92	0.936	1266
PF00307	CH	Calponin homology (CH) domain	84	0.838	0.898	0.867	3414
PF00319	SRF-TF	SRF-type transcription factor (DNA-binding and dimerisation domain)	85	0.977	0.969	0.973	2676
PF00326	Peptidase_S9	Prolyl oligopeptidase family	86	0.83	0.832	0.831	5328
PF00327	Ribosomal_L30	Ribosomal protein L30p/L7e	87	0.948	0.97	0.959	1656
PF00329	Complex1_30kDa	Respiratory-chain NADH dehydrogenase, 30 Kd subunit	88	0.953	0.955	0.954	1062
PF00330	Aconitase	Aconitase family (aconitate hydratase)	89	0.971	0.944	0.957	1758
PF00334	NDK	Nucleoside diphosphate kinase	90	0.957	0.905	0.93	1818
PF00346	Complex1_49kDa	Respiratory-chain NADH dehydrogenase, 49 Kd subunit	91	0.932	0.925	0.928	1176
PF00347	Ribosomal_L6	Ribosomal protein L6	92	0.977	0.983	0.98	1692
PF00361	Proton_antipo_M	Proton-conducting membrane transporter	93	0.954	0.976	0.965	5220
PF00364	Biotin_lipoyl	Biotin-requiring enzyme	94	0.94	0.96	0.95	4140
PF00365	PFK	Phosphofructokinase	95	0.982	0.973	0.978	2244
PF00370	FGGY_N	FGGY family of carbohydrate kinases, N-terminal domain	96	0.73	0.611	0.665	252
PF00382	TFIIB	Transcription factor TFIIB repeat	97	0.9	0.873	0.886	534
PF00383	dCMP_cyt_deam_1	Cytidine and deoxycytidylate deaminase zinc-binding region	98	0.979	0.978	0.978	5808
PF00389	2-Hacid_dh	D-isomer specific 2-hydroxyacid dehydrogenase, catalytic domain	99	0.954	0.966	0.96	4218
PF00391	PEP-utilizers	PEP-utilising enzyme, mobile domain	100	0.95	0.938	0.944	1350
PF00403	HMA	Heavy-metal-associated domain	101	0.977	0.98	0.979	5526
PF00407	Bet_v_1	Pathogenesis-related protein Bet v 1 family	102	0.858	0.904	0.881	738
PF00413	Peptidase_M10	Matrixin	103	0.967	0.928	0.947	1338
PF00439	Bromodomain	Bromodomain	104	0.757	0.771	0.764	1842
PF00441	Acyl-CoA_dh_1	Acyl-CoA dehydrogenase, C-terminal domain	105	0.568	0.65	0.606	594
PF00443	UCH	Ubiquitin carboxyl-terminal hydrolase	106	0.919	0.918	0.918	5106
PF00447	HSF_DNA-bind	HSF-type DNA-binding	107	0.942	0.945	0.944	1518
PF00454	PI3_PI4_kinase	Phosphatidylinositol 3- and 4-kinase	108	0.97	0.85	0.906	1332
PF00456	Transketolase_N	Transketolase, thiamine diphosphate binding domain	109	0.97	0.952	0.961	1944
PF00462	Glutaredoxin	Glutaredoxin	110	0.953	0.951	0.952	4158
PF00464	SHMT	Serine hydroxymethyltransferase	111	0.976	0.884	0.928	924
PF00472	RF-1	RF-1 domain	112	0.965	0.982	0.973	3750
PF00478	IMPDH	IMP dehydrogenase / GMP reductase domain	113	0.808	0.849	0.828	1254
PF00481	PP2C	Protein phosphatase 2C	114	0.919	0.935	0.927	4326
PF00483	NTP_transferase	Nucleotidyl transferase	115	0.983	0.982	0.983	8124
PF00485	PRK	Phosphoribulokinase / Uridine kinase family	116	0.97	0.954	0.962	2106
PF00487	FA_desaturase	Fatty acid desaturase	117	0.971	0.979	0.975	3864
PF00497	SBP_bac_3	Bacterial extracellular solute-binding proteins, family 3	118	0.878	0.948	0.912	7794
PF00498	FHA	FHA domain	119	0.917	0.931	0.924	4344
PF00501	AMP-binding	AMP-binding enzyme	120	0.872	0.903	0.887	6960
PF00505	HMG_box	HMG (high mobility group) box	121	0.921	0.936	0.929	3912
PF00534	Glycos_transf_1	Glycosyl transferases group 1	122	0.928	0.961	0.944	9216
PF00535	Glycos_transf_2	Glycosyl transferase family 2	123	0.981	0.987	0.984	18984
PF00536	SAM_1	SAM domain (Sterile alpha motif)	124	0.808	0.587	0.68	402
PF00542	Ribosomal_L12	Ribosomal protein L7/L12 C-terminal domain	125	0.956	0.961	0.959	1542
PF00550	PP-binding	Phosphopantetheine attachment site	126	0.854	0.914	0.883	4104
PF00551	Formyl_trans_N	Formyl transferase	127	0.973	0.959	0.966	3984
PF00557	Peptidase_M24	Metallopeptidase family M24	128	0.962	0.963	0.962	5052
PF00561	Abhydrolase_1	alpha/beta hydrolase fold	129	0.932	0.974	0.952	25464
PF00562	RNA_pol_Rpb2_6	RNA polymerase Rpb2, domain 6	130	0.937	0.891	0.913	1272
PF00564	PB1	PB1 domain	131	0.784	0.794	0.789	1236
PF00567	TUDOR	Tudor domain	132	0.684	0.62	0.65	690
PF00571	CBS	CBS domain	133	0.951	0.963	0.957	11100
PF00576	Transthyretin	HIUase/Transthyretin family	134	0.933	0.957	0.945	624
PF00578	AhpC-TSA	AhpC/TSA family	135	0.958	0.971	0.964	8436
PF00581	Rhodanese	Rhodanese-like domain	136	0.967	0.96	0.963	8118
PF00582	Usp	Universal stress protein family	137	0.941	0.968	0.954	7086
PF00588	SpoU_methylase	SpoU rRNA Methylase family	138	0.987	0.982	0.984	4998
PF00590	TP_methylase	Tetrapyrrole (Corrin/Porphyrin) Methylases	139	0.968	0.982	0.975	5238
PF00591	Glycos_transf_3	Glycosyl transferase family, a/b domain	140	0.982	0.972	0.977	2118
PF00596	Aldolase_II	Class II Aldolase and Adducin N-terminal domain	141	0.933	0.937	0.935	2940
PF00615	RGS	Regulator of G protein signaling domain	142	0.763	0.819	0.79	1566
PF00622	SPRY	SPRY domain	143	0.876	0.898	0.887	2370
PF00626	Gelsolin	Gelsolin repeat	144	0.927	0.904	0.916	1506
PF00631	G-gamma	GGL domain	145	0.784	0.887	0.832	450
PF00635	Motile_Sperm	MSP (Major sperm protein) domain	146	0.785	0.795	0.79	1044
PF00636	Ribonuclease_3	Ribonuclease III domain	147	0.792	0.682	0.733	654
PF00644	PARP	Poly(ADP-ribose) polymerase catalytic domain	148	0.841	0.839	0.84	1050
PF00646	F-box	F-box domain	149	0.815	0.939	0.872	11028
PF00650	CRAL_TRIO	CRAL/TRIO domain	150	0.855	0.863	0.859	2076
PF00651	BTB	BTB/POZ domain	151	0.92	0.958	0.938	10776
PF00657	Lipase_GDSL	GDSL-like Lipase/Acylhydrolase	152	0.861	0.947	0.902	6060
PF00665	rve	Integrase core domain	153	0.929	0.956	0.943	5694
PF00673	Ribosomal_L5_C	ribosomal L5P family C-terminus	154	0.978	0.981	0.98	1602
PF00676	E1_dh	Dehydrogenase E1 component	155	0.961	0.943	0.952	3048
PF00682	HMGL-like	HMGL-like	156	0.962	0.969	0.966	4020
PF00685	Sulfotransfer_1	Sulfotransferase domain	157	0.815	0.878	0.845	3462
PF00689	Cation_ATPase_C	Cation transporting ATPase, C-terminus	158	0.758	0.658	0.705	486
PF00690	Cation_ATPase_N	Cation transporter/ATPase, N-terminus	159	0.895	0.9	0.898	1008
PF00694	Aconitase_C	Aconitase C-terminal domain	160	0.978	0.97	0.974	1344
PF00696	AA_kinase	Amino acid kinase family	161	0.967	0.97	0.968	5304
PF00697	PRAI	N-(5'phosphoribosyl)anthranilate (PRA) isomerase	162	0.961	0.955	0.958	912
PF00704	Glyco_hydro_18	Glycosyl hydrolases family 18	163	0.918	0.919	0.919	3552
PF00707	IF3_C	Translation initiation factor IF-3, C-terminal domain	164	0.981	0.981	0.981	1308
PF00717	Peptidase_S24	Peptidase S24-like	165	0.898	0.936	0.917	2514
PF00724	Oxidored_FMN	NADH:flavin oxidoreductase / NADH oxidase family	166	0.963	0.959	0.961	4218
PF00725	3HCDH	3-hydroxyacyl-CoA dehydrogenase, C-terminal domain	167	0.55	0.153	0.239	72
PF00728	Glyco_hydro_20	Glycosyl hydrolase family 20, catalytic domain	168	0.91	0.907	0.908	1542
PF00730	HhH-GPD	HhH-GPD superfamily base excision DNA repair protein	169	0.941	0.98	0.96	4188
PF00732	GMC_oxred_N	GMC oxidoreductase	170	0.734	0.459	0.565	294
PF00749	tRNA-synt_1c	tRNA synthetases class I (E and Q), catalytic domain	171	0.989	0.971	0.98	3270
PF00754	F5_F8_type_C	F5/8 type C domain	172	0.531	0.695	0.602	2022
PF00780	CNH	CNH domain	173	0.802	0.75	0.775	600
PF00781	DAGK_cat	Diacylglycerol kinase catalytic domain	174	0.985	0.971	0.978	3330
PF00782	DSPc	Dual specificity phosphatase, catalytic domain	175	0.945	0.923	0.934	2328
PF00787	PX	PX domain	176	0.916	0.895	0.905	2568
PF00793	DAHP_synth_1	DAHP synthetase I family	177	0.977	0.968	0.973	2154
PF00808	CBFD_NFYB_HMF	Histone-like transcription factor (CBF/NF-Y) and archaeal histone	178	0.865	0.916	0.89	1284
PF00814	TsaD	tRNA N6-adenosine threonylcarbamoyltransferase	179	0.938	0.966	0.952	2934
PF00817	IMS	impB/mucB/samB family	180	0.972	0.967	0.969	2994
PF00849	PseudoU_synth_2	RNA pseudouridylate synthase	181	0.974	0.979	0.976	6528
PF00850	Hist_deacetyl	Histone deacetylase domain	182	0.977	0.964	0.971	3012
PF00855	PWWP	PWWP domain	183	0.771	0.771	0.771	888
PF00856	SET	SET domain	184	0.894	0.913	0.903	4332
PF00857	Isochorismatase	Isochorismatase family	185	0.926	0.962	0.944	4188
PF00883	Peptidase_M17	Cytosol aminopeptidase family, catalytic domain	186	0.985	0.961	0.973	1626
PF00884	Sulfatase	Sulfatase	187	0.966	0.956	0.961	6600
PF00888	Cullin	Cullin family	188	0.73	0.824	0.774	870
PF00890	FAD_binding_2	FAD binding domain	189	0.798	0.638	0.709	390
PF00891	Methyltransf_2	O-methyltransferase domain	190	0.883	0.74	0.805	654
PF00892	EamA	EamA-like transporter family	191	0.785	0.843	0.813	1038
PF00899	ThiF	ThiF family	192	0.86	0.793	0.825	666
PF00903	Glyoxalase	Glyoxalase/Bleomycin resistance protein/Dioxygenase superfamily	193	0.959	0.979	0.969	12564
PF00909	Ammonium_transp	Ammonium Transporter Family	194	0.901	0.758	0.824	240
PF00916	Sulfate_transp	Sulfate permease family	195	0.711	0.535	0.611	198
PF00930	DPPIV_N	Dipeptidyl peptidase IV (DPP IV) N-terminal region	196	0.658	0.392	0.492	186
PF00931	NB-ARC	NB-ARC domain	197	0.802	0.793	0.797	2004
PF00933	Glyco_hydro_3	Glycosyl hydrolase family 3 N terminal domain	198	0.611	0.306	0.407	180
PF00955	HCO3_cotransp	HCO3- transporter family	199	0.945	0.939	0.942	1080
PF00982	Glyco_transf_20	Glycosyltransferase family 20	200	0.937	0.771	0.846	306
PF00999	Na_H_Exchanger	Sodium/hydrogen exchanger family	201	0.851	0.849	0.85	1086
PF01028	Topoisom_I	Eukaryotic DNA topoisomerase I, catalytic core	202	0.95	0.941	0.946	612
PF01029	NusB	NusB family	203	0.965	0.974	0.969	2124
PF01048	PNP_UDP_1	Phosphorylase superfamily	204	0.757	0.485	0.591	522
PF01058	Oxidored_q6	NADH ubiquinone oxidoreductase, 20 Kd subunit	205	0.974	0.979	0.977	1818
PF01061	ABC2_membrane	ABC-2 type transporter	206	0.679	0.693	0.686	348
PF01073	3Beta_HSD	3-beta hydroxysteroid dehydrogenase/isomerase family	207	0.581	0.15	0.238	120
PF01074	Glyco_hydro_38N	Glycosyl hydrolases family 38 N-terminal domain	208	0.717	0.407	0.52	162
PF01087	GalP_UDP_transf	Galactose-1-phosphate uridyl transferase, N-terminal domain	209	0.948	0.962	0.955	744
PF01088	Peptidase_C12	Ubiquitin carboxyl-terminal hydrolase, family 1	210	0.904	0.886	0.895	798
PF01094	ANF_receptor	Receptor family ligand binding region	211	0.422	0.279	0.336	420
PF01095	Pectinesterase	Pectinesterase	212	0.816	0.531	0.644	192
PF01103	Omp85	Omp85 superfamily domain	213	0.82	0.856	0.838	480
PF01105	EMP24_GP25L	emp24/gp25L/p24 family/GOLD	214	0.91	0.942	0.926	1326
PF01106	NifU	NifU-like domain	215	0.981	0.976	0.979	1188
PF01113	DapB_N	Dihydrodipicolinate reductase, N-terminus	216	0.95	0.93	0.94	1566
PF01137	RTC	RNA 3'-terminal phosphate cyclase	217	0.889	0.885	0.887	480
PF01138	RNase_PH	3' exoribonuclease family, domain 1	218	0.842	0.761	0.799	414
PF01145	Band_7	SPFH domain / Band 7 family	219	0.831	0.701	0.76	294
PF01167	Tub	Tub family	220	0.851	0.765	0.806	366
PF01168	Ala_racemase_N	Alanine racemase, N-terminal domain	221	0.955	0.967	0.961	3762
PF01170	UPF0020	Putative RNA methylase family UPF0020	222	0.785	0.865	0.823	2052
PF01171	ATP_bind_3	PP-loop family	223	0.96	0.953	0.956	2172
PF01172	SBDS	Shwachman-Bodian-Diamond syndrome (SBDS) protein	224	0.859	0.902	0.88	378
PF01176	eIF-1a	Translation initiation factor 1A / IF-1	225	0.939	0.966	0.952	1272
PF01180	DHO_dh	Dihydroorotate dehydrogenase	226	0.919	0.896	0.908	2328
PF01182	Glucosamine_iso	Glucosamine-6-phosphate isomerases/6-phosphogluconolactonase	227	0.989	0.966	0.977	1944
PF01205	UPF0029	Uncharacterized protein family UPF0029	228	0.796	0.796	0.796	216
PF01212	Beta_elim_lyase	Beta-eliminating lyase	229	0.719	0.295	0.418	156
PF01243	Putative_PNPOx	Pyridoxamine 5'-phosphate oxidase	230	0.558	0.599	0.578	726
PF01248	Ribosomal_L7Ae	Ribosomal protein L7Ae/L30e/S12e/Gadd45 family	231	0.837	0.847	0.842	588
PF01259	SAICAR_synt	SAICAR synthetase	232	0.978	0.955	0.966	1482
PF01261	AP_endonuc_2	Xylose isomerase-like TIM barrel	233	0.813	0.812	0.813	846
PF01273	LBP_BPI_CETP	LBP / BPI / CETP family, N-terminal domain	234	0.888	0.843	0.865	396
PF01281	Ribosomal_L9_N	Ribosomal protein L9, N-terminal domain	235	0.954	0.96	0.957	1350
PF01287	eIF-5a	Eukaryotic elongation factor 5A hypusine, DNA-binding OB fold	236	0.94	0.853	0.895	348
PF01301	Glyco_hydro_35	Glycosyl hydrolases family 35	237	0.879	0.845	0.862	1140
PF01321	Creatinase_N	Creatinase/Prolidase N-terminal domain	238	1	0.017	0.033	60
PF01323	DSBA	DSBA-like thioredoxin domain	239	0.863	0.724	0.788	384
PF01326	PPDK_N	Pyruvate phosphate dikinase, AMP/ATP-binding domain	240	0.571	0.472	0.517	282
PF01336	tRNA_anti-codon	OB-fold nucleic acid binding domain	241	0.974	0.963	0.969	5604
PF01343	Peptidase_S49	Peptidase family S49	242	0.967	0.943	0.955	1224
PF01348	Intron_maturas2	Type II intron maturase	243	0.766	0.766	0.766	192
PF01370	Epimerase	NAD dependent epimerase/dehydratase family	244	0.513	0.262	0.347	1068
PF01397	Terpene_synth	Terpene synthase, N-terminal domain	245	0.438	0.222	0.295	126
PF01398	JAB	JAB1/Mov34/MPN/PAD-1 ubiquitin protease	246	0.915	0.89	0.902	1656
PF01399	PCI	PCI domain	247	0.9	0.945	0.922	3216
PF01408	GFO_IDH_MocA	Oxidoreductase family, NAD-binding Rossmann fold	248	0.864	0.85	0.857	1032
PF01416	PseudoU_synth_1	tRNA pseudouridine synthase	249	0.832	0.757	0.793	210
PF01417	ENTH	ENTH domain	250	0.89	0.882	0.886	534
PF01423	LSM	LSM domain	251	0.927	0.942	0.934	3210
PF01425	Amidase	Amidase	252	0.943	0.854	0.896	1356
PF01432	Peptidase_M3	Peptidase family M3	253	0.909	0.764	0.831	420
PF01433	Peptidase_M1	Peptidase family M1 domain	254	0.657	0.497	0.566	378
PF01435	Peptidase_M48	Peptidase family M48	255	0.754	0.785	0.769	666
PF01464	SLT	Transglycosylase SLT domain	256	0.606	0.596	0.601	552
PF01466	Skp1	Skp1 family, dimerisation domain	257	0.89	0.889	0.89	648
PF01467	CTP_transf_like	Cytidylyltransferase-like	258	0.785	0.581	0.668	540
PF01471	PG_binding_1	Putative peptidoglycan binding domain	259	0.371	0.206	0.265	462
PF01476	LysM	LysM domain	260	0.5	0.123	0.197	228
PF01485	IBR	IBR domain, a half RING-finger domain	261	0.914	0.94	0.927	1806
PF01493	GXGXG	GXGXG motif	262	0.978	0.873	0.922	204
PF01494	FAD_binding_3	FAD binding domain	263	0.847	0.865	0.856	2400
PF01502	PRA-CH	Phosphoribosyl-AMP cyclohydrolase	264	0.981	0.975	0.978	1254
PF01507	PAPS_reduct	Phosphoadenosine phosphosulfate reductase family	265	0.814	0.667	0.733	210
PF01509	TruB_N	TruB family pseudouridylate synthase (N terminal domain)	266	0.978	0.977	0.977	1704
PF01521	Fe-S_biosyn	Iron-sulphur cluster biosynthesis	267	0.851	0.885	0.868	486
PF01541	GIY-YIG	GIY-YIG catalytic domain	268	0.888	0.912	0.9	2814
PF01553	Acyltransferase	Acyltransferase	269	0.932	0.964	0.948	6780
PF01556	DnaJ_C	DnaJ C terminal domain	270	0.98	0.973	0.976	3846
PF01557	FAA_hydrolase	Fumarylacetoacetate (FAA) hydrolase family	271	0.899	0.84	0.868	612
PF01565	FAD_binding_4	FAD binding domain	272	0.935	0.941	0.938	3648
PF01571	GCV_T	Aminomethyltransferase folate-binding domain	273	0.67	0.57	0.616	228
PF01575	MaoC_dehydratas	MaoC like domain	274	0.754	0.63	0.687	468
PF01578	Cytochrom_C_asm	Cytochrome C assembly protein	275	0.977	0.961	0.969	1848
PF01590	GAF	GAF domain	276	0.333	0.091	0.143	198
PF01591	6PF2K	6-phosphofructo-2-kinase	277	0.974	0.931	0.952	360
PF01592	NifU_N	NifU-like N terminal domain	278	0.906	0.957	0.931	1314
PF01593	Amino_oxidase	Flavin containing amine oxidoreductase	279	0.867	0.816	0.841	1296
PF01612	DNA_pol_A_exo1	3'-5' exonuclease	280	0.556	0.128	0.208	234
PF01624	MutS_I	MutS domain I	281	0.987	0.933	0.959	1692
PF01625	PMSR	Peptide methionine sulfoxide reductase	282	0.974	0.973	0.973	1986
PF01627	Hpt	Hpt domain	283	0.404	0.274	0.326	84
PF01636	APH	Phosphotransferase enzyme family	284	0.9	0.882	0.891	2790
PF01645	Glu_synthase	Conserved region in glutamate synthase	285	0.932	0.925	0.928	1368
PF01648	ACPS	4'-phosphopantetheinyl transferase superfamily	286	0.636	0.71	0.671	438
PF01656	CbiA	CobQ/CobB/MinD/ParA nucleotide binding domain	287	0.62	0.376	0.468	234
PF01658	Inos-1-P_synth	Myo-inositol-1-phosphate synthase	288	0.97	0.941	0.955	624
PF01661	Macro	Macro domain	289	0.827	0.838	0.832	1242
PF01699	Na_Ca_ex	Sodium/calcium exchanger protein	290	0.957	0.964	0.96	3318
PF01712	dNK	Deoxynucleoside kinase	291	0.951	0.876	0.912	636
PF01717	Meth_synt_2	Cobalamin-independent synthase, Catalytic domain	292	0.975	0.949	0.962	1440
PF01728	FtsJ	FtsJ-like methyltransferase	293	0.828	0.562	0.67	240
PF01734	Patatin	Patatin-like phospholipase	294	0.98	0.959	0.969	4086
PF01738	DLH	Dienelactone hydrolase family	295	0.791	0.659	0.719	834
PF01743	PolyA_pol	Poly A polymerase head domain	296	0.918	0.954	0.936	1770
PF01753	zf-MYND	MYND finger	297	0.93	0.956	0.943	2250
PF01756	ACOX	Acyl-CoA oxidase	298	0.65	0.406	0.5	96
PF01761	DHQ_synthase	3-dehydroquinate synthase	299	0.988	0.966	0.977	1458
PF01764	Lipase_3	Lipase (class 3)	300	0.918	0.911	0.915	1386
PF01765	RRF	Ribosome recycling factor	301	0.974	0.976	0.975	1446
PF01775	Ribosomal_L18A	Ribosomal proteins 50S-L18Ae/60S-L20/60S-L18A	302	0.773	0.842	0.806	336
PF01778	Ribosomal_L28e	Ribosomal L28e protein family	303	0.945	0.951	0.948	492
PF01794	Ferric_reduct	Ferric reductase like transmembrane component	304	0.79	0.887	0.836	858
PF01814	Hemerythrin	Hemerythrin HHE cation binding domain	305	0.632	0.743	0.683	798
PF01823	MACPF	MAC/Perforin domain	306	0.763	0.792	0.777	756
PF01833	TIG	IPT/TIG domain	307	0.373	0.214	0.272	192
PF01841	Transglut_core	Transglutaminase-like superfamily	308	0.565	0.117	0.194	222
PF01844	HNH	HNH endonuclease	309	0.722	0.866	0.787	1398
PF01852	START	START domain	310	0.704	0.774	0.737	1122
PF01869	BcrAD_BadFG	BadF/BadG/BcrA/BcrD ATPase family	311	0.887	0.794	0.838	228
PF01872	RibD_C	RibD C-terminal domain	312	0.772	0.814	0.793	420
PF01878	EVE	EVE domain	313	0.796	0.774	0.785	252
PF01883	FeS_assembly_P	Iron-sulfur cluster assembly protein	314	0.83	0.849	0.84	444
PF01902	Diphthami_syn_2	Diphthamide synthase	315	0.919	0.89	0.904	462
PF01909	NTP_transf_2	Nucleotidyltransferase domain	316	0.515	0.413	0.458	414
PF01915	Glyco_hydro_3_C	Glycosyl hydrolase family 3 C-terminal domain	317	0.981	0.958	0.97	3570
PF01918	Alba	Alba	318	0.854	0.705	0.773	258
PF01926	MMR_HSR1	50S ribosome-binding GTPase	319	0.778	0.826	0.801	1008
PF01928	CYTH	CYTH domain	320	0.834	0.896	0.864	966
PF01936	NYN	NYN domain	321	0.678	0.587	0.629	516
PF01937	DUF89	Protein of unknown function DUF89	322	0.851	0.761	0.803	330
PF01966	HD	HD domain	323	0.386	0.344	0.364	360
PF01967	MoaC	MoaC family	324	0.975	0.973	0.974	1110
PF01975	SurE	Survival protein SurE	325	0.96	0.964	0.962	1182
PF01979	Amidohydro_1	Amidohydrolase family	326	0.832	0.793	0.812	1308
PF02018	CBM_4_9	Carbohydrate binding domain	327	0.564	0.45	0.501	522
PF02036	SCP2	SCP-2 sterol transfer family	328	0.705	0.608	0.653	408
PF02037	SAP	SAP domain	329	0.782	0.699	0.738	1188
PF02114	Phosducin	Phosducin	330	0.879	0.846	0.862	240
PF02129	Peptidase_S15	X-Pro dipeptidyl-peptidase (S15 family)	331	0.421	0.232	0.299	138
PF02140	Gal_Lectin	Galactose binding lectin domain	332	0.706	0.672	0.688	408
PF02179	BAG	BAG domain	333	0.8	0.769	0.784	546
PF02195	ParBc	ParB-like nuclease domain	334	0.901	0.95	0.925	3036
PF02201	SWIB	SWIB/MDM2 domain	335	0.788	0.861	0.823	840
PF02214	BTB_2	BTB/POZ domain	336	0.625	0.177	0.276	198
PF02221	E1_DerP2_DerF2	ML domain	337	0.763	0.832	0.796	546
PF02223	Thymidylate_kin	Thymidylate kinase	338	0.942	0.928	0.935	1344
PF02225	PA	PA domain	339	0.872	0.591	0.704	264
PF02229	PC4	Transcriptional Coactivator p15 (PC4)	340	0.845	0.789	0.816	228
PF02230	Abhydrolase_2	Phospholipase/Carboxylesterase	341	0.847	0.667	0.746	474
PF02263	GBP	Guanylate-binding protein, N-terminal domain	342	0.924	0.877	0.9	702
PF02270	TFIIF_beta	TFIIF, beta subunit HTH domain	343	0.921	0.885	0.903	252
PF02298	Cu_bind_like	Plastocyanin-like domain	344	0.941	0.933	0.937	1188
PF02320	UCR_hinge	Ubiquinol-cytochrome C reductase hinge protein	345	0.919	0.901	0.91	252
PF02338	OTU	OTU-like cysteine protease	346	0.89	0.864	0.877	1350
PF02357	NusG	Transcription termination factor nusG	347	0.937	0.961	0.949	1494
PF02362	B3	B3 DNA binding domain	348	0.958	0.951	0.955	2430
PF02374	ArsA_ATPase	Anion-transporting ATPase	349	0.972	0.983	0.977	5088
PF02441	Flavoprotein	Flavoprotein	350	0.837	0.768	0.801	228
PF02453	Reticulon	Reticulon	351	0.869	0.932	0.899	882
PF02463	SMC_N	RecF/RecN/SMC N terminal domain	352	0.909	0.781	0.84	306
PF02469	Fasciclin	Fasciclin domain	353	0.888	0.873	0.881	2202
PF02470	MlaD	MlaD protein	354	0.926	0.922	0.924	270
PF02492	cobW	CobW/HypB/UreG, nucleotide-binding domain	355	0.941	0.806	0.868	258
PF02518	HATPase_c	Histidine kinase-, DNA gyrase B-, and HSP90-like ATPase	356	0.766	0.755	0.761	930
PF02538	Hydantoinase_B	Hydantoinase B/oxoprolinase	357	0.974	0.934	0.954	816
PF02540	NAD_synthase	NAD synthase	358	0.977	0.965	0.971	2568
PF02541	Ppx-GppA	Ppx/GppA phosphatase family	359	0.958	0.961	0.96	1656
PF02581	TMP-TENI	Thiamine monophosphate synthase	360	0.922	0.94	0.931	1614
PF02582	DUF155	Uncharacterised ACR, YagE family COG1723	361	0.965	0.911	0.937	360
PF02602	HEM4	Uroporphyrinogen-III synthase HemD	362	0.835	0.908	0.87	1320
PF02617	ClpS	ATP-dependent Clp protease adaptor protein ClpS	363	0.924	0.955	0.939	930
PF02668	TauD	Taurine catabolism dioxygenase TauD, TfdA family	364	0.78	0.805	0.792	960
PF02676	TYW3	Methyltransferase TYW3	365	0.778	0.778	0.778	180
PF02678	Pirin	Pirin	366	0.973	0.974	0.973	2034
PF02683	DsbD	Cytochrome C biogenesis protein transmembrane region	367	0.97	0.963	0.967	1332
PF02698	DUF218	DUF218 domain	368	0.863	0.865	0.864	1014
PF02714	RSN1_7TM	Calcium-dependent channel, 7TM region, putative phosphate	369	0.379	0.367	0.373	90
PF02721	DUF223	Domain of unknown function DUF223	370	0.504	0.533	0.518	246
PF02731	SKIP_SNW	SKIP/SNW domain	371	0.931	0.939	0.935	246
PF02737	3HCDH_N	3-hydroxyacyl-CoA dehydrogenase, NAD binding domain	372	0.561	0.603	0.581	594
PF02738	Ald_Xan_dh_C2	Molybdopterin-binding domain of aldehyde dehydrogenase	373	0.948	0.947	0.947	2556
PF02769	AIRS_C	AIR synthase related protein, C-terminal domain	374	0.981	0.973	0.977	3918
PF02770	Acyl-CoA_dh_M	Acyl-CoA dehydrogenase, middle domain	375	0.389	0.078	0.13	90
PF02771	Acyl-CoA_dh_N	Acyl-CoA dehydrogenase, N-terminal domain	376	0.672	0.55	0.605	420
PF02775	TPP_enzyme_C	Thiamine pyrophosphate enzyme, C-terminal TPP binding domain	377	0.937	0.923	0.93	2220
PF02776	TPP_enzyme_N	Thiamine pyrophosphate enzyme, N-terminal TPP binding domain	378	0.718	0.681	0.699	414
PF02782	FGGY_C	FGGY family of carbohydrate kinases, C-terminal domain	379	0.839	0.721	0.776	696
PF02784	Orn_Arg_deC_N	Pyridoxal-dependent decarboxylase, pyridoxal binding domain	380	0.972	0.948	0.96	2022
PF02800	Gp_dh_C	Glyceraldehyde 3-phosphate dehydrogenase, C-terminal domain	381	0.984	0.974	0.979	2676
PF02803	Thiolase_C	Thiolase, C-terminal domain	382	0.722	0.641	0.679	198
PF02823	ATP-synt_DE_N	ATP synthase, Delta/Epsilon chain, beta-sandwich domain	383	0.928	0.964	0.946	1476
PF02826	2-Hacid_dh_C	D-isomer specific 2-hydroxyacid dehydrogenase, NAD binding domain	384	0.75	0.109	0.191	192
PF02836	Glyco_hydro_2_C	Glycosyl hydrolases family 2, TIM barrel domain	385	0.605	0.275	0.378	324
PF02837	Glyco_hydro_2_N	Glycosyl hydrolases family 2, sugar binding domain	386	0.519	0.504	0.511	270
PF02845	CUE	CUE domain	387	0.82	0.833	0.826	954
PF02852	Pyr_redox_dim	Pyridine nucleotide-disulphide oxidoreductase, dimerisation domain	388	0.983	0.979	0.981	4494
PF02854	MIF4G	MIF4G domain	389	0.768	0.868	0.815	1044
PF02861	Clp_N	Clp amino terminal domain, pathogenicity island component	390	0.798	0.812	0.805	480
PF02866	Ldh_1_C	lactate/malate dehydrogenase, alpha/beta C-terminal domain	391	0.714	0.278	0.4	90
PF02867	Ribonuc_red_lgC	Ribonucleotide reductase, barrel domain	392	0.96	0.942	0.951	1992
PF02874	ATP-synt_ab_N	ATP synthase alpha/beta family, beta-barrel domain	393	0.5	0.244	0.328	78
PF02878	PGM_PMM_I	Phosphoglucomutase/phosphomannomutase, alpha/beta/alpha domain I	394	0.986	0.972	0.979	4068
PF02887	PK_C	Pyruvate kinase, alpha/beta domain	395	0.794	0.45	0.574	60
PF02889	Sec63	Sec63 Brl domain	396	0.87	0.667	0.755	312
PF02892	zf-BED	BED zinc finger	397	0.714	0.778	0.745	672
PF02893	GRAM	GRAM domain	398	0.92	0.876	0.897	1386
PF02897	Peptidase_S9_N	Prolyl oligopeptidase, N-terminal beta-propeller domain	399	0.5	0.242	0.327	66
PF02900	LigB	Catalytic LigB subunit of aromatic ring-opening dioxygenase	400	0.892	0.809	0.849	246
PF02902	Peptidase_C48	Ulp1 protease family, C-terminal catalytic domain	401	0.368	0.204	0.262	432
PF02906	Fe_hyd_lg_C	Iron only hydrogenase large subunit, C-terminal domain	402	0.949	0.918	0.933	744
PF02913	FAD-oxidase_C	FAD linked oxidases, C-terminal domain	403	0.538	0.073	0.128	96
PF02926	THUMP	THUMP domain	404	0.913	0.895	0.904	702
PF02941	FeThRed_A	Ferredoxin thioredoxin reductase variable alpha chain	405	0.863	0.815	0.838	54
PF02953	zf-Tim10_DDP	Tim10/DDP family zinc finger	406	0.835	0.922	0.877	462
PF03007	WES_acyltransf	Wax ester synthase-like Acyl-CoA acyltransferase domain	407	0.63	0.372	0.468	78
PF03015	Sterile	Male sterility protein	408	0.316	0.143	0.197	42
PF03016	Exostosin	Exostosin family	409	0.922	0.789	0.851	660
PF03024	Folate_rec	Folate receptor family	410	0.903	0.896	0.9	270
PF03031	NIF	NLI interacting factor-like phosphatase	411	0.88	0.85	0.864	1962
PF03033	Glyco_transf_28	Glycosyltransferase family 28 N-terminal domain	412	0.939	0.833	0.883	222
PF03060	NMO	Nitronate monooxygenase	413	0.545	0.2	0.293	150
PF03061	4HBT	Thioesterase superfamily	414	0.738	0.852	0.791	1428
PF03070	TENA_THI-4	TENA/THI-4/PQQC family	415	0.815	0.89	0.851	870
PF03088	Str_synth	Strictosidine synthase	416	0.848	0.794	0.821	282
PF03101	FAR1	FAR1 DNA-binding domain	417	0.742	0.752	0.747	408
PF03104	DNA_pol_B_exo1	DNA polymerase family B, exonuclease domain	418	0.793	0.724	0.757	744
PF03107	C1_2	C1 domain	419	0.94	0.918	0.929	576
PF03108	DBD_Tnp_Mut	MuDR family transposase	420	0.736	0.62	0.673	324
PF03118	RNA_pol_A_CTD	Bacterial RNA polymerase, alpha chain C terminal domain	421	0.959	0.941	0.95	1224
PF03129	HGTP_anticodon	Anticodon binding domain	422	0.977	0.969	0.973	4380
PF03143	GTP_EFTU_D3	Elongation factor Tu C-terminal domain	423	0.975	0.976	0.976	2736
PF03151	TPT	Triose-phosphate Transporter family	424	0.915	0.925	0.92	1302
PF03159	XRN_N	XRN 5'-3' exonuclease N-terminus	425	0.429	0.227	0.297	66
PF03161	LAGLIDADG_2	LAGLIDADG DNA endonuclease family	426	0.607	0.283	0.386	60
PF03167	UDG	Uracil DNA glycosylase superfamily	427	0.942	0.958	0.95	3120
PF03168	LEA_2	Late embryogenesis abundant protein	428	0.898	0.932	0.915	702
PF03171	2OG-FeII_Oxy	2OG-Fe(II) oxygenase superfamily	429	0.964	0.958	0.961	5034
PF03177	Nucleoporin_C	Non-repetitive/WGA-negative nucleoporin C-terminal	430	0.629	0.407	0.494	54
PF03178	CPSF_A	CPSF A subunit region	431	0.861	0.773	0.814	264
PF03190	Thioredox_DsbH	Protein of unknown function, DUF255	432	0.947	0.902	0.924	438
PF03200	Glyco_hydro_63	Glycosyl hydrolase family 63 C-terminal domain	433	0.875	0.847	0.861	504
PF03328	HpcH_HpaI	HpcH/HpaI aldolase/citrate lyase family	434	0.797	0.704	0.748	402
PF03330	DPBB_1	Lytic transglycolase	435	0.966	0.972	0.969	2076
PF03358	FMN_red	NADPH-dependent FMN reductase	436	0.798	0.757	0.777	486
PF03364	Polyketide_cyc	Polyketide cyclase / dehydrase and lipid transport	437	0.678	0.711	0.694	402
PF03372	Exo_endo_phos	Endonuclease/Exonuclease/phosphatase family	438	0.81	0.761	0.785	1806
PF03435	Sacchrp_dh_NADP	Saccharopine dehydrogenase NADP binding domain	439	0.904	0.89	0.897	318
PF03441	FAD_binding_7	FAD binding domain of DNA photolyase	440	0.948	0.962	0.955	1560
PF03446	NAD_binding_2	NAD binding domain of 6-phosphogluconate dehydrogenase	441	0.914	0.933	0.924	5982
PF03460	NIR_SIR_ferr	Nitrite/Sulfite reductase ferredoxin-like half domain	442	0.967	0.961	0.964	1956
PF03467	Smg4_UPF3	Smg-4/UPF3 family	443	0.869	0.845	0.857	258
PF03468	XS	XS domain	444	0.87	0.769	0.816	156
PF03469	XH	XH domain	445	0.72	0.546	0.621	108
PF03478	DUF295	Protein of unknown function (DUF295)	446	0.624	0.503	0.557	630
PF03501	S10_plectin	Plectin/S10 domain	447	0.936	0.939	0.938	312
PF03522	SLC12	Solute carrier family 12	448	0.957	0.922	0.939	756
PF03572	Peptidase_S41	Peptidase family S41	449	0.661	0.576	0.616	288
PF03629	SASA	Carbohydrate esterase, sialic acid-specific acetylesterase	450	0.706	0.503	0.588	300
PF03644	Glyco_hydro_85	Glycosyl hydrolase family 85	451	0.848	0.698	0.766	192
PF03719	Ribosomal_S5_C	Ribosomal protein S5, C-terminal domain	452	0.97	0.961	0.965	1776
PF03732	Retrotrans_gag	Retrotransposon gag protein	453	0.366	0.32	0.342	822
PF03763	Remorin_C	Remorin, C-terminal region	454	0.939	0.852	0.893	270
PF03798	TRAM_LAG1_CLN8	TLC domain	455	0.89	0.921	0.906	1374
PF03807	F420_oxidored	NADP oxidoreductase coenzyme F420-dependent	456	0.451	0.274	0.341	168
PF03810	IBN_N	Importin-beta N-terminal domain	457	0.873	0.933	0.902	1704
PF03828	PAP_assoc	Cid1 family poly A polymerase	458	0.875	0.871	0.873	714
PF03847	TFIID_20kDa	Transcription initiation factor TFIID subunit A	459	0.9	0.825	0.86	228
PF03868	Ribosomal_L6e_N	Ribosomal protein L6, N-terminal domain	460	0.994	0.919	0.955	186
PF03876	SHS2_Rpb7-N	SHS2 domain found in N terminus of Rpb7p/Rpc25p/MJ0397	461	0.853	0.919	0.885	480
PF03914	CBF	CBF/Mak21 family	462	0.931	0.841	0.884	258
PF03936	Terpene_synth_C	Terpene synthase family, metal binding domain	463	0.485	0.575	0.527	318
PF03939	Ribosomal_L23eN	Ribosomal protein L23, N-terminal domain	464	0.977	0.962	0.969	312
PF03941	INCENP_ARK-bind	Inner centromere protein, ARK binding region	465	0.774	0.769	0.772	156
PF03953	Tubulin_C	Tubulin C-terminal domain	466	0.831	0.649	0.729	114
PF03959	FSH1	Serine hydrolase (FSH1)	467	0.935	0.819	0.873	492
PF03962	Mnd1	Mnd1 HTH domain	468	0.833	0.833	0.833	186
PF03987	Autophagy_act_C	Autophagocytosis associated protein, active-site domain	469	0.81	0.803	0.807	462
PF04003	Utp12	Dip2/Utp12 Family	470	0.953	0.949	0.951	684
PF04030	ALO	D-arabinono-1,4-lactone oxidase	471	0	0	0	54
PF04042	DNA_pol_E_B	DNA polymerase alpha/epsilon subunit B	472	0.916	0.915	0.915	726
PF04043	PMEI	Plant invertase/pectin methylesterase inhibitor	473	0.883	0.941	0.911	1710
PF04048	Sec8_exocyst	Sec8 exocyst complex component specific domain	474	0.842	0.859	0.85	198
PF04059	RRM_2	RNA recognition motif 2	475	0.913	0.618	0.737	186
PF04065	Not3	Not1 N-terminal domain, CCR4-Not complex component	476	0.935	0.948	0.942	306
PF04073	tRNA_edit	Aminoacyl-tRNA editing domain	477	0.753	0.776	0.764	366
PF04083	Abhydro_lipase	Partial alpha/beta-hydrolase lipase region	478	0.956	0.471	0.631	138
PF04100	Vps53_N	Vps53-like, N-terminal	479	0.824	0.862	0.842	276
PF04101	Glyco_tran_28_C	Glycosyltransferase family 28 C-terminal domain	480	0.586	0.556	0.57	234
PF04153	NOT2_3_5	NOT2 / NOT3 / NOT5 family	481	0.934	0.846	0.888	234
PF04182	B-block_TFIIIC	B-block binding subunit of TFIIIC	482	0.451	0.58	0.508	174
PF04187	Cofac_haem_bdg	Haem-binding uptake, Tiki superfamily, ChaN	483	0.846	0.856	0.851	264
PF04194	PDCD2_C	Programmed cell death protein 2, C-terminal putative domain	484	0.9	0.833	0.865	258
PF04212	MIT	MIT (microtubule interacting and transport) domain	485	0.821	0.627	0.711	204
PF04253	TFR_dimer	Transferrin receptor-like dimerisation domain	486	0.954	0.904	0.928	570
PF04266	ASCH	ASCH domain	487	0.652	0.643	0.647	504
PF04280	Tim44	Tim44-like domain	488	0.899	0.895	0.897	768
PF04321	RmlD_sub_bind	RmlD substrate binding domain	489	0.84	0.939	0.887	6336
PF04366	Ysc84	Las17-binding protein actin regulator	490	0.959	0.947	0.953	300
PF04389	Peptidase_M28	Peptidase family M28	491	0.804	0.685	0.74	480
PF04406	TP6A_N	Type IIB DNA topoisomerase	492	0.883	0.789	0.833	336
PF04413	Glycos_transf_N	3-Deoxy-D-manno-octulosonic-acid transferase (kdotransferase)	493	0.961	0.944	0.953	630
PF04419	4F5	4F5 protein related disordered region	494	0.838	0.921	0.877	252
PF04424	MINDY_DUB	MINDY deubiquitinase	495	0.936	0.85	0.891	294
PF04428	Choline_kin_N	Choline kinase N terminus	496	0.986	0.869	0.924	84
PF04438	zf-HIT	HIT zinc finger	497	0.914	0.944	0.929	696
PF04446	Thg1	tRNAHis guanylyltransferase	498	0.837	0.82	0.828	300
PF04455	Saccharop_dh_N	LOR/SDH bifunctional enzyme conserved region	499	0.96	0.88	0.918	108
PF04536	TPM_phosphatase	TPM domain	500	0.89	0.895	0.892	684
PF04548	AIG1	AIG1 family	501	0.604	0.392	0.475	222
PF04572	Gb3_synth	Alpha 1,4-glycosyltransferase conserved region	502	0.771	0.75	0.761	216
PF04601	DUF569	Domain of unknown function (DUF569)	503	0.815	0.787	0.801	174
PF04641	Rtf2	Rtf2 RING-finger	504	0.876	0.87	0.873	276
PF04652	Vta1	Vta1 like	505	0.797	0.81	0.803	300
PF04669	Polysacc_synt_4	Polysaccharide biosynthesis	506	0.833	0.782	0.807	216
PF04675	DNA_ligase_A_N	DNA ligase N terminus	507	0.922	0.94	0.931	1074
PF04678	MCU	Mitochondrial calcium uniporter	508	0.971	0.914	0.942	222
PF04695	Pex14_N	Pex14 N-terminal domain	509	0.919	0.889	0.904	216
PF04696	Pinin_SDK_memA	pinin/SDK/memA/ protein conserved region	510	0.901	0.889	0.895	216
PF04719	TAFII28	hTAFII28-like protein conserved region	511	0.808	0.808	0.808	198
PF04755	PAP_fibrillin	PAP_fibrillin	512	0.752	0.781	0.766	210
PF04757	Pex2_Pex12	Pex2 / Pex12 amino terminal region	513	0.934	0.883	0.908	384
PF04774	HABP4_PAI-RBP1	Hyaluronan / mRNA binding family	514	0.868	0.899	0.883	306
PF04782	DUF632	Protein of unknown function (DUF632)	515	0.871	0.871	0.871	450
PF04784	DUF547	Protein of unknown function, DUF547	516	0.75	0.486	0.59	216
PF04802	SMK-1	Component of IIS longevity pathway SMK-1	517	0.966	0.932	0.949	366
PF04821	TIMELESS	Timeless protein	518	0.95	0.891	0.919	192
PF04824	Rad21_Rec8	Conserved region of Rad21 / Rec8 like protein	519	0.474	0.231	0.31	78
PF04825	Rad21_Rec8_N	N terminus of Rad21 / Rec8 like protein	520	0.803	0.731	0.765	156
PF04828	GFA	Glutathione-dependent formaldehyde-activating enzyme	521	0.944	0.944	0.944	978
PF04851	ResIII	Type III restriction enzyme, res subunit	522	0.794	0.806	0.8	1560
PF04864	Alliinase_C	Allinase	523	0.818	0.45	0.581	60
PF04869	Uso1_p115_head	Uso1 / p115 like vesicle tethering protein, head region	524	0.953	0.94	0.946	216
PF04893	Yip1	Yip1 domain	525	0.762	0.762	0.762	210
PF04909	Amidohydro_2	Amidohydrolase	526	0.785	0.784	0.784	1134
PF04927	SMP	Seed maturation protein	527	0.768	0.896	0.827	144
PF04928	PAP_central	Poly(A) polymerase central domain	528	0.948	0.851	0.897	552
PF04935	SURF6	Surfeit locus protein 6	529	0.96	0.947	0.954	228
PF04970	LRAT	Lecithin retinol acyltransferase	530	0.766	0.655	0.706	330
PF04981	NMD3	NMD3 family	531	0.923	0.899	0.911	318
PF04987	PigN	Phosphatidylinositolglycan class N (PIG-N)	532	0.858	0.808	0.833	120
PF04997	RNA_pol_Rpb1_1	RNA polymerase Rpb1, domain 1	533	0.924	0.856	0.889	438
PF05004	IFRD	Interferon-related developmental regulator (IFRD)	534	0.884	0.876	0.88	306
PF05008	V-SNARE	Vesicle transport v-SNARE protein N-terminus	535	0.904	0.909	0.907	342
PF05022	SRP40_C	SRP40, C-terminal domain	536	0.943	0.901	0.922	222
PF05047	L51_S25_CI-B8	Mitochondrial ribosomal protein L51 / S25 / CI-B8 domain	537	0.752	0.888	0.814	534
PF05057	DUF676	Putative serine esterase (DUF676)	538	0.874	0.774	0.821	522
PF05066	HARE-HTH	HB1, ASXL, restriction endonuclease HTH domain	539	0.934	0.646	0.764	198
PF05116	S6PP	Sucrose-6F-phosphate phosphohydrolase	540	0.935	0.94	0.937	2532
PF05131	Pep3_Vps18	Pep3/Vps18/deep orange family	541	0.898	0.886	0.892	228
PF05140	ResB	ResB-like family	542	0.951	0.961	0.956	510
PF05175	MTS	Methyltransferase small domain	543	0.607	0.339	0.435	360
PF05179	CDC73_C	RNA pol II accessory factor, Cdc73 family, C-terminal	544	0.932	0.86	0.895	222
PF05182	Fip1	Fip1 motif	545	0.956	0.915	0.935	282
PF05191	ADK_lid	Adenylate kinase, active site lid	546	0.985	0.992	0.989	1260
PF05193	Peptidase_M16_C	Peptidase M16 inactive domain	547	0.96	0.954	0.957	4830
PF05199	GMC_oxred_C	GMC oxidoreductase	548	0.679	0.57	0.62	426
PF05236	TAF4	Transcription initiation factor TFIID component TAF4 family	549	0.892	0.856	0.874	348
PF05239	PRC	PRC-barrel domain	550	0.541	0.466	0.501	324
PF05303	DUF727	Protein of unknown function (DUF727)	551	0.524	0.437	0.476	126
PF05362	Lon_C	Lon protease (S16) C-terminal proteolytic domain	552	0.859	0.809	0.833	972
PF05368	NmrA	NmrA-like family	553	0.842	0.755	0.796	1770
PF05419	GUN4	GUN4-like	554	0.664	0.632	0.648	144
PF05486	SRP9-21	Signal recognition particle 9 kDa protein (SRP9)	555	0.859	0.911	0.884	180
PF05529	Bap31	Bap31/Bap29 transmembrane region	556	0.932	0.932	0.932	294
PF05603	DUF775	Protein of unknown function (DUF775)	557	0.838	0.884	0.86	216
PF05617	Prolamin_like	Prolamin-like	558	0.746	0.662	0.701	204
PF05627	AvrRpt-cleavage	Cleavage site for pathogenic type III effector avirulence factor Avr	559	0.773	0.87	0.818	246
PF05641	Agenet	Agenet domain	560	0.778	0.799	0.788	606
PF05670	NFACT-R_1	NFACT protein RNA binding domain	561	0.91	0.855	0.881	330
PF05678	VQ	VQ motif	562	0.715	0.903	0.798	462
PF05686	Glyco_transf_90	Glycosyl transferase family 90	563	0.83	0.867	0.848	924
PF05687	BES1_N	BES1/BZR1 plant transcription factor, N-terminal	564	0.923	0.877	0.899	204
PF05699	Dimer_Tnp_hAT	hAT family C-terminal dimerisation region	565	0.414	0.601	0.49	1164
PF05703	Auxin_canalis	Auxin canalisation	566	0.793	0.876	0.833	210
PF05770	Ins134_P3_kin	Inositol 1,3,4-trisphosphate 5/6-kinase ATP-grasp domain	567	0.888	0.878	0.883	270
PF05843	Suf	Suppressor of forked protein (Suf)	568	0.938	0.836	0.884	378
PF05899	Cupin_3	Protein of unknown function (DUF861)	569	0.873	0.827	0.85	342
PF05916	Sld5	GINS complex protein	570	0.645	0.557	0.598	228
PF05920	Homeobox_KN	Homeobox KN domain	571	0.798	0.399	0.532	228
PF06003	SMN	Survival motor neuron protein (SMN)	572	0.811	0.869	0.839	168
PF06047	Nkap_C	NF-kappa-B-activating protein C-terminal domain	573	0.975	0.944	0.959	162
PF06094	GGACT	Gamma-glutamyl cyclotransferase, AIG2-like	574	0.675	0.697	0.686	564
PF06110	DUF953	Eukaryotic protein of unknown function (DUF953)	575	0.871	0.776	0.821	192
PF06148	COG2	COG (conserved oligomeric Golgi) complex component, COG2	576	0.866	0.863	0.864	306
PF06155	GBBH-like_N	Gamma-butyrobetaine hydroxylase-like, N-terminal	577	0.831	0.843	0.837	210
PF06221	zf-C2HC5	Putative zinc finger motif, C2HC5-type	578	0.912	0.901	0.907	162
PF06391	MAT1	CDK-activating kinase assembly factor MAT1	579	0.931	0.866	0.897	186
PF06414	Zeta_toxin	Zeta toxin	580	0.895	0.93	0.912	1878
PF06418	CTP_synth_N	CTP synthase N-terminus	581	0.917	0.458	0.611	48
PF06424	PRP1_N	PRP1 splicing factor, N-terminal	582	0.978	0.925	0.951	240
PF06454	DUF1084	Protein of unknown function (DUF1084)	583	0.813	0.787	0.8	216
PF06472	ABC_membrane_2	ABC transporter transmembrane region 2	584	0.73	0.674	0.701	132
PF06544	DUF1115	Protein of unknown function (DUF1115)	585	0.904	0.87	0.887	378
PF06574	FAD_syn	FAD synthetase	586	0.967	0.962	0.964	1242
PF06747	CHCH	CHCH domain	587	0.884	0.88	0.882	276
PF06803	DUF1232	Protein of unknown function (DUF1232)	588	0.909	0.909	0.909	450
PF06813	Nodulin-like	Nodulin-like	589	0.974	0.903	0.937	330
PF06839	zf-GRF	GRF zinc finger	590	0.797	0.769	0.783	450
PF06886	TPX2	Targeting protein for Xklp2 (TPX2) domain	591	0.885	0.863	0.873	240
PF06911	Senescence	Senescence-associated protein	592	0.887	0.869	0.878	306
PF06916	DUF1279	Protein of unknown function (DUF1279)	593	0.947	0.868	0.906	228
PF06925	MGDG_synth	Monogalactosyldiacylglycerol (MGDG) synthase	594	0.865	0.847	0.856	294
PF06943	zf-LSD1	LSD1 zinc finger	595	0.899	0.909	0.904	186
PF06974	WS_DGAT_C	WS/DGAT C-terminal domain	596	0.492	0.227	0.311	132
PF06991	MFAP1	Microfibril-associated/Pre-mRNA processing	597	0.891	0.864	0.878	228
PF07000	DUF1308	Protein of unknown function (DUF1308)	598	0.81	0.767	0.788	150
PF07002	Copine	Copine	599	0.906	0.744	0.817	390
PF07035	Mic1	Colon cancer-associated protein Mic1-like	600	0.8	0.857	0.828	126
PF07059	DUF1336	Protein of unknown function (DUF1336)	601	0.887	0.696	0.78	204
PF07064	RIC1	RIC1	602	0.838	0.862	0.85	174
PF07106	TBPIP	TBPIP/Hop2 winged helix domain	603	0.8	0.69	0.741	168
PF07137	VDE	VDE lipocalin domain	604	0.907	0.681	0.778	72
PF07145	PAM2	Ataxin-2 C-terminal region	605	0.73	0.767	0.748	348
PF07228	SpoIIE	Stage II sporulation protein E (SpoIIE)	606	0.949	0.952	0.951	4236
PF07298	NnrU	NnrU protein	607	0.947	0.9	0.923	360
PF07303	Occludin_ELL	Occludin homology domain	608	0.946	0.891	0.918	294
PF07460	NUMOD3	NUMOD3 motif	609	0.788	0.542	0.642	96
PF07522	DRMBL	DNA repair metallo-beta-lactamase	610	0.853	0.885	0.869	426
PF07524	Bromo_TP	Bromodomain associated	611	0.722	0.651	0.685	252
PF07534	TLD	TLD	612	0.561	0.264	0.359	174
PF07557	Shugoshin_C	Shugoshin C terminus	613	0.821	0.869	0.845	222
PF07647	SAM_2	SAM domain (Sterile alpha motif)	614	0.804	0.672	0.732	408
PF07651	ANTH	ANTH domain	615	0.881	0.831	0.855	534
PF07707	BACK	BTB And C-terminal Kelch	616	0.4	0.019	0.035	108
PF07714	PK_Tyr_Ser-Thr	Protein tyrosine and serine/threonine kinase	617	0.417	0.033	0.062	300
PF07716	bZIP_2	Basic region leucine zipper	618	0.779	0.831	0.804	1044
PF07717	OB_NTP_bind	Oligonucleotide/oligosaccharide-binding (OB)-fold	619	0.804	0.374	0.51	198
PF07724	AAA_2	AAA domain (Cdc48 subfamily)	620	0.822	0.308	0.448	120
PF07727	RVT_2	Reverse transcriptase (RNA-dependent DNA polymerase)	621	0.421	0.416	0.418	630
PF07728	AAA_5	AAA domain (dynein-related subfamily)	622	0.892	0.884	0.888	3756
PF07731	Cu-oxidase_2	Multicopper oxidase	623	0.665	0.515	0.581	336
PF07732	Cu-oxidase_3	Multicopper oxidase	624	0.639	0.497	0.559	300
PF07734	FBA_1	F-box associated	625	0.309	0.261	0.283	180
PF07741	BRF1	Brf1-like TBP-binding domain	626	0.607	0.472	0.531	36
PF07743	HSCB_C	HSCB C-terminal oligomerisation domain	627	0.923	0.938	0.93	384
PF07744	SPOC	SPOC domain	628	0.773	0.671	0.719	234
PF07748	Glyco_hydro_38C	Glycosyl hydrolases family 38 C-terminal domain	629	0.263	0.064	0.103	78
PF07766	LETM1	LETM1-like protein	630	0.86	0.895	0.877	618
PF07774	EMC1_C	ER membrane protein complex subunit 1, C-terminal	631	0.96	0.938	0.949	258
PF07786	DUF1624	Protein of unknown function (DUF1624)	632	0.882	0.874	0.878	342
PF07802	GCK	GCK domain	633	0.917	0.733	0.815	60
PF07808	RED_N	RED-like protein N-terminal region	634	0.894	0.856	0.875	216
PF07814	WAPL	Wings apart-like protein regulation of heterochromatin	635	0.897	0.838	0.866	228
PF07839	CaM_binding	Plant calmodulin-binding domain	636	0.87	0.833	0.851	168
PF07842	GCFC	GC-rich sequence DNA-binding factor-like protein	637	0.885	0.856	0.87	270
PF07859	Abhydrolase_3	alpha/beta hydrolase fold	638	0.726	0.559	0.632	1296
PF07883	Cupin_2	Cupin domain	639	0.592	0.466	0.521	1086
PF07884	VKOR	Vitamin K epoxide reductase family	640	0.865	0.905	0.885	474
PF07885	Ion_trans_2	Ion channel	641	0.687	0.624	0.654	534
PF07889	DUF1664	Protein of unknown function (DUF1664)	642	0.958	0.913	0.935	126
PF07915	PRKCSH	Glucosidase II beta subunit-like protein	643	0.911	0.825	0.866	372
PF07928	Vps54	Vps54-like protein	644	0.945	0.867	0.904	240
PF07959	Fucokinase	L-fucokinase	645	0.771	0.561	0.649	66
PF07962	Swi3	Replication Fork Protection Component Swi3	646	0.89	0.859	0.874	198
PF07969	Amidohydro_3	Amidohydrolase family	647	0.834	0.811	0.823	774
PF07970	COPIIcoated_ERV	Endoplasmic reticulum vesicle transporter	648	0.955	0.933	0.944	594
PF07977	FabA	FabA-like domain	649	0.955	0.955	0.955	1518
PF07985	SRR1	SRR1	650	0.665	0.579	0.619	216
PF07992	Pyr_redox_2	Pyridine nucleotide-disulphide oxidoreductase	651	0.829	0.811	0.82	1404
PF07993	NAD_binding_4	Male sterility protein	652	0.751	0.691	0.72	1854
PF08030	NAD_binding_6	Ferric reductase NAD binding domain	653	0.537	0.315	0.397	162
PF08031	BBE	Berberine and berberine like	654	0.25	0.16	0.195	150
PF08100	Dimerisation	Dimerisation domain	655	0.847	0.905	0.875	654
PF08159	NUC153	NUC153 domain	656	0.929	0.889	0.908	234
PF08161	NUC173	NUC173 domain	657	0.931	0.75	0.831	108
PF08167	RIX1	rRNA processing/ribosome biogenesis	658	0.942	0.873	0.906	204
PF08172	CASP_C	CASP C terminal	659	0.865	0.921	0.892	216
PF08212	Lipocalin_2	Lipocalin-like domain	660	0.822	0.882	0.851	612
PF08240	ADH_N	Alcohol dehydrogenase GroES-like domain	661	0.587	0.236	0.337	258
PF08241	Methyltransf_11	Methyltransferase domain	662	0.57	0.596	0.583	2334
PF08264	Anticodon_1	Anticodon-binding domain of tRNA ligase	663	0.75	0.2	0.316	120
PF08268	FBA_3	F-box associated domain	664	0.358	0.171	0.232	222
PF08314	Sec39	Secretory pathway protein Sec39	665	0.868	0.767	0.814	120
PF08323	Glyco_transf_5	Starch synthase catalytic domain	666	0.924	0.76	0.834	354
PF08338	DUF1731	Domain of unknown function (DUF1731)	667	0.975	0.964	0.969	690
PF08378	NERD	Nuclease-related domain	668	0.734	0.803	0.767	960
PF08387	FBD	FBD	669	0.606	0.212	0.314	312
PF08389	Xpo1	Exportin 1-like protein	670	0.767	0.761	0.764	498
PF08392	FAE1_CUT1_RppA	FAE1/Type III polyketide synthase-like protein	671	0.714	0.347	0.467	72
PF08423	Rad51	Rad51	672	0.951	0.932	0.941	2610
PF08450	SGL	SMP-30/Gluconolactonase/LRE-like region	673	0.76	0.702	0.73	504
PF08491	SE	Squalene epoxidase	674	0.854	0.738	0.792	786
PF08492	SRP72	SRP72 RNA-binding domain	675	0.909	0.926	0.917	216
PF08501	Shikimate_dh_N	Shikimate dehydrogenase substrate binding domain	676	0.98	0.968	0.974	1848
PF08510	PIG-P	PIG-P	677	0.826	0.921	0.871	216
PF08511	COQ9	COQ9	678	0.811	0.885	0.846	348
PF08541	ACP_syn_III_C	3-Oxoacyl-[acyl-carrier-protein (ACP)] synthase III C terminal	679	0.932	0.917	0.924	1020
PF08542	Rep_fac_C	Replication factor C C-terminal domain	680	0.5	0.048	0.087	42
PF08547	CIA30	Complex I intermediate-associated protein 30 (CIA30)	681	0.693	0.682	0.688	192
PF08573	SAE2	DNA repair protein endonuclease SAE2/CtIP C-terminus	682	0.843	0.833	0.838	168
PF08574	Iwr1	Transcription factor Iwr1	683	0.956	0.929	0.942	210
PF08585	RMI1_N	RecQ mediated genome instability protein	684	0.751	0.716	0.733	282
PF08596	Lgl_C	Lethal giant larvae(Lgl) like, C-terminal	685	0.918	0.936	0.927	264
PF08609	Fes1	Nucleotide exchange factor Fes1	686	0.885	0.913	0.898	252
PF08627	CRT-like	CRT-like, chloroquine-resistance transporter-like	687	0.9	0.867	0.883	414
PF08628	Nexin_C	Sorting nexin C terminal	688	0.8	0.485	0.604	66
PF08646	Rep_fac-A_C	Replication factor-A C terminal domain	689	0.622	0.62	0.621	276
PF08648	SNRNP27	U4/U6.U5 small nuclear ribonucleoproteins	690	0.895	0.877	0.886	204
PF08652	RAI1	RAI1 like PD-(D/E)XK nuclease	691	0.741	0.821	0.779	234
PF08662	eIF2A	Eukaryotic translation initiation factor eIF2A	692	0.799	0.902	0.847	1158
PF08670	MEKHLA	MEKHLA domain	693	0.891	0.488	0.631	84
PF08698	Fcf2	Fcf2 pre-rRNA processing	694	0.934	0.902	0.917	234
PF08718	GLTP	Glycolipid transfer protein (GLTP)	695	0.72	0.738	0.729	282
PF08719	NADAR	NADAR domain	696	0.773	0.715	0.743	372
PF08729	HUN	HPC2 and ubinuclein domain	697	0.808	0.837	0.822	276
PF08766	DEK_C	DEK C terminal domain	698	0.827	0.679	0.746	240
PF08767	CRM1_C	CRM1 C terminal	699	0.857	0.3	0.444	60
PF08768	DUF1794	Domain of unknown function (DUF1794)	700	0.855	0.833	0.844	402
PF08784	RPA_C	Replication protein A C terminal	701	0.829	0.753	0.789	174
PF08790	zf-LYAR	LYAR-type C2HC zinc finger	702	0.886	0.89	0.888	210
PF08801	Nucleoporin_N	Nup133 N terminal like	703	0.522	0.286	0.369	42
PF08806	Sep15_SelM	Sep15/SelM redox domain	704	0.769	0.75	0.759	120
PF08920	SF3b1	Splicing factor 3B subunit 1	705	0.977	0.97	0.973	132
PF08969	USP8_dimer	USP8 dimerisation domain	706	0.4	0.143	0.211	42
PF09118	DUF1929	Domain of unknown function (DUF1929)	707	0.942	0.942	0.942	552
PF09133	SANTA	SANTA (SANT Associated)	708	0.539	0.608	0.571	102
PF09177	Syntaxin-6_N	Syntaxin 6, N-terminal	709	0.854	0.921	0.886	330
PF09258	Glyco_transf_64	Glycosyl transferase family 64 domain	710	0.901	0.838	0.868	444
PF09273	Rubis-subs-bind	Rubisco LSMT substrate-binding	711	0.614	0.398	0.483	108
PF09325	Vps5	Vps5 C terminal like	712	0.603	0.583	0.593	60
PF09329	zf-primase	Primase zinc finger	713	0.848	0.877	0.863	204
PF09346	SMI1_KNR4	SMI1 / KNR4 family (SUKH-1)	714	0.705	0.703	0.704	804
PF09348	DUF1990	Domain of unknown function (DUF1990)	715	0.787	0.787	0.787	216
PF09349	OHCU_decarbox	OHCU decarboxylase	716	0.909	0.854	0.881	630
PF09350	DUF1992	Domain of unknown function (DUF1992)	717	0.723	0.899	0.801	276
PF09368	Sas10	Sas10 C-terminal domain	718	0.946	0.906	0.926	234
PF09370	PEP_hydrolase	Phosphoenolpyruvate hydrolase-like	719	0.973	0.897	0.934	204
PF09402	MSC	Man1-Src1p-C-terminal domain	720	0.828	0.885	0.855	234
PF09405	Btz	CASC3/Barentsz eIF4AIII binding	721	0.876	0.858	0.867	246
PF09412	XendoU	Endoribonuclease XendoU	722	0.816	0.759	0.786	228
PF09430	DUF2012	Protein of unknown function (DUF2012)	723	0.943	0.852	0.895	270
PF09468	RNase_H2-Ydr279	Ydr279p protein family (RNase H2 complex component) wHTH domain	724	0.786	0.857	0.82	210
PF09588	YqaJ	YqaJ-like viral recombinase domain	725	0.419	0.24	0.305	204
PF09734	Tau95	RNA polymerase III transcription factor (TF)IIIC subunit HTH domain	726	0.817	0.869	0.842	252
PF09745	DUF2040	Coiled-coil domain-containing protein 55 (DUF2040)	727	0.945	0.923	0.934	222
PF09759	Atx10homo_assoc	Spinocerebellar ataxia type 10 protein domain	728	0.759	0.759	0.759	216
PF09763	Sec3_C	Exocyst complex component Sec3	729	0.761	0.759	0.76	348
PF09764	Nt_Gln_amidase	N-terminal glutamine amidase	730	0.643	0.697	0.669	132
PF09811	Yae1_N	Essential protein Yae1, N terminal	731	0.851	0.907	0.878	258
PF09816	EAF	RNA polymerase II transcription elongation factor	732	0.868	0.858	0.863	246
PF09835	DUF2062	Uncharacterized protein conserved in bacteria (DUF2062)	733	0.925	0.955	0.94	312
PF10033	ATG13	Autophagy-related protein 13	734	0.903	0.886	0.895	264
PF10075	CSN8_PSD8_EIF3K	CSN8/PSMD8/EIF3K family	735	0.814	0.841	0.827	678
PF10159	MMtag	Multiple myeloma tumor-associated	736	0.969	0.969	0.969	162
PF10172	DDA1	Det1 complexing ubiquitin ligase	737	0.685	0.656	0.67	96
PF10187	FAM192A_Fyv6_N	FAM192A/Fyv6, N-terminal domain	738	0.865	0.956	0.908	228
PF10193	Telomere_reg-2	Telomere length regulation protein	739	0.924	0.878	0.901	222
PF10213	MRP-S28	Mitochondrial ribosomal subunit protein	740	0.803	0.788	0.795	222
PF10241	KxDL	Uncharacterized conserved protein	741	0.768	0.844	0.804	180
PF10252	PP28	Casein kinase substrate phosphoprotein PP28	742	0.926	0.917	0.921	204
PF10260	SAYSvFN	Uncharacterized conserved domain (SAYSvFN)	743	0.804	0.804	0.804	102
PF10276	zf-CHCC	Zinc-finger domain	744	0.882	0.921	0.901	252
PF10313	DUF2415	Uncharacterised protein domain (DUF2415)	745	0.835	0.804	0.819	138
PF10350	DUF2428	Putative death-receptor fusion protein (DUF2428)	746	0.417	0.119	0.185	42
PF10377	ATG11	Autophagy-related protein 11	747	0.753	0.655	0.701	84
PF10382	DUF2439	Protein of unknown function (DUF2439)	748	0.814	0.819	0.817	144
PF10406	TAF8_C	Transcription factor TFIID complex subunit 8 C-term	749	0.75	0.143	0.24	42
PF10419	TFIIIC_sub6	TFIIIC subunit triple barrel domain	750	0.687	0.681	0.684	216
PF10440	WIYLD	Ubiquitin-binding WIYLD domain	751	0.706	0.545	0.615	66
PF10441	Urb2	Urb2/Npa2 family	752	0.357	0.119	0.179	42
PF10447	EXOSC1	Exosome component EXOSC1/CSL4	753	0.875	0.892	0.883	204
PF10453	NUFIP1	Nuclear fragile X mental retardation-interacting protein 1 (NUFIP1)	754	0.852	0.71	0.774	186
PF10469	AKAP7_NLS	AKAP7 2'5' RNA ligase-like domain	755	0.673	0.712	0.692	510
PF10496	Syntaxin-18_N	SNARE-complex protein Syntaxin-18 N-terminus	756	0.944	0.944	0.944	180
PF10497	zf-4CXXC_R1	Zinc-finger domain of monoamine-oxidase A repressor R1	757	0.884	0.875	0.879	408
PF10502	Peptidase_S26	Signal peptidase, peptidase S26	758	0.94	0.938	0.939	2502
PF10520	TMEM189_B_dmain	B domain of TMEM189, localisation domain	759	0.906	0.727	0.807	132
PF10536	PMD	Plant mobile domain	760	0.65	0.697	0.673	822
PF10545	MADF_DNA_bdg	Alcohol dehydrogenase transcription factor Myb/SANT-like	761	0.707	0.751	0.728	918
PF10551	MULE	MULE transposase domain	762	0.389	0.426	0.407	678
PF10615	DUF2470	Protein of unknown function (DUF2470)	763	0.755	0.594	0.665	234
PF10650	zf-C3H1	Putative zinc-finger domain	764	0.818	0.5	0.621	54
PF10672	Methyltrans_SAM	S-adenosylmethionine-dependent methyltransferase	765	0.968	0.944	0.956	936
PF10699	HAP2-GCS1	Male gamete fusion factor	766	0.808	0.636	0.712	66
PF11331	zinc_ribbon_12	Probable zinc-ribbon domain	767	0.932	0.944	0.938	144
PF11566	PI31_Prot_N	PI31 proteasome regulator N-terminal	768	0.943	0.864	0.902	228
PF11698	V-ATPase_H_C	V-ATPase subunit H	769	0.876	0.883	0.879	264
PF11708	Slu7	Pre-mRNA splicing Prp18-interacting factor	770	0.94	0.907	0.923	258
PF11717	Tudor-knot	RNA binding activity-knot of a chromodomain	771	0.878	0.905	0.892	654
PF11721	Malectin	Malectin domain	772	0.725	0.615	0.666	312
PF11789	zf-Nse	Zinc-finger of the MIZ type in Nse subunit	773	0.833	0.799	0.815	318
PF11817	Foie-gras_1	Foie gras liver health family 1	774	0.801	0.768	0.784	168
PF11835	RRM_8	RRM-like domain	775	0.5	0.048	0.087	42
PF11838	ERAP1_C	ERAP1-like C-terminal domain	776	0.909	0.922	0.916	1518
PF11919	DUF3437	Domain of unknown function (DUF3437)	777	0	0	0	30
PF11926	DUF3444	Domain of unknown function (DUF3444)	778	0.878	0.802	0.838	288
PF11935	DUF3453	Domain of unknown function (DUF3453)	779	0.776	0.808	0.792	120
PF11938	DUF3456	TLR4 regulator and MIR-interacting MSAP	780	0.879	0.833	0.856	288
PF11955	PORR	Plant organelle RNA recognition domain	781	0.882	0.927	0.904	234
PF11976	Rad60-SLD	Ubiquitin-2 like Rad60 SUMO-like	782	0.778	0.838	0.807	1752
PF12014	DUF3506	Domain of unknown function (DUF3506)	783	0.873	0.667	0.756	144
PF12031	BAF250_C	SWI/SNF-like complex subunit BAF250/Osa	784	0.842	0.444	0.582	36
PF12047	DNMT1-RFD	Cytosine specific DNA methyltransferase replication foci domain	785	0.676	0.511	0.582	90
PF12076	Wax2_C	WAX2 C-terminal domain	786	0.888	0.911	0.9	192
PF12110	Nup96	Nuclear protein 96	787	0.649	0.667	0.658	72
PF12157	DUF3591	Protein of unknown function (DUF3591)	788	0.879	0.79	0.832	138
PF12166	Piezo_RRas_bdg	Piezo non-specific cation channel, R-Ras-binding domain	789	0.81	0.315	0.453	54
PF12169	DNA_pol3_gamma3	DNA polymerase III subunits gamma and tau domain III	790	0.826	0.452	0.585	42
PF12171	zf-C2H2_jaz	Zinc-finger double-stranded RNA-binding	791	0.869	0.927	0.897	1692
PF12204	DUF3598	Domain of unknown function (DUF3598)	792	0.771	0.514	0.617	72
PF12214	TPX2_importin	Cell cycle regulated microtubule associated protein	793	0.825	0.917	0.868	180
PF12215	Glyco_hydr_116N	beta-glucosidase 2, glycosyl-hydrolase family 116 N-term	794	0.891	0.819	0.854	288
PF12295	Symplekin_C	Symplekin tight junction protein C terminal	795	0.733	0.611	0.667	36
PF12325	TMF_TATA_bd	TATA element modulatory factor 1 TATA binding	796	0.93	0.934	0.932	198
PF12333	Ipi1_N	Rix1 complex component involved in 60S ribosome maturation	797	0.916	0.887	0.902	222
PF12348	CLASP_N	CLASP N terminal	798	0.705	0.789	0.745	342
PF12612	TFCD_C	Tubulin folding cofactor D C terminal	799	0.906	0.828	0.865	186
PF12624	Chorein_N	N-terminal region of Chorein or VPS13	800	0.726	0.679	0.702	156
PF12656	G-patch_2	G-patch domain	801	0.75	0.822	0.785	702
PF12657	TFIIIC_delta	Transcription factor IIIC subunit delta N-term	802	0.862	0.828	0.845	174
PF12678	zf-rbx1	RING-H2 zinc finger domain	803	0.956	0.941	0.949	324
PF12680	SnoaL_2	SnoaL-like domain	804	0.646	0.774	0.704	1548
PF12697	Abhydrolase_6	Alpha/beta hydrolase family	805	0.77	0.363	0.493	1734
PF12706	Lactamase_B_2	Beta-lactamase superfamily domain	806	0.836	0.763	0.798	696
PF12708	Pectate_lyase_3	Pectate lyase superfamily protein	807	0.768	0.634	0.694	276
PF12717	Cnd1	non-SMC mitotic condensation complex subunit 1	808	0.882	0.928	0.904	1542
PF12719	Cnd3	Nuclear condensing complex subunits, C-term domain	809	0.917	0.833	0.873	240
PF12755	Vac14_Fab1_bd	Vacuolar 14 Fab1-binding region	810	0.857	0.841	0.849	384
PF12756	zf-C2H2_2	C2H2 type zinc-finger (2 copies)	811	0.912	0.772	0.836	294
PF12766	Pyridox_oxase_2	Pyridoxamine 5'-phosphate oxidase	812	0.875	0.916	0.895	810
PF12776	Myb_DNA-bind_3	Myb/SANT-like DNA-binding domain	813	0.688	0.695	0.692	636
PF12796	Ank_2	Ankyrin repeats (3 copies)	814	0.78	0.762	0.771	1440
PF12819	Malectin_like	Malectin-like domain	815	0.694	0.554	0.616	168
PF12862	ANAPC5	Anaphase-promoting complex subunit 5	816	0.744	0.615	0.673	288
PF12871	PRP38_assoc	Pre-mRNA-splicing factor 38-associated hydrophilic C-term	817	0.786	0.917	0.846	72
PF12894	ANAPC4_WD40	Anaphase-promoting complex subunit 4 WD40 domain	818	0.315	0.105	0.157	162
PF12896	ANAPC4	Anaphase-promoting complex, cyclosome, subunit 4	819	0.795	0.861	0.827	216
PF12907	zf-met2	Zinc-binding	820	0.784	0.806	0.795	36
PF12923	RRP7	Ribosomal RNA-processing protein 7 (RRP7) C-terminal domain	821	0.905	0.871	0.888	186
PF12928	tRNA_int_end_N2	tRNA-splicing endonuclease subunit sen54 N-term	822	0.868	0.705	0.778	234
PF12931	Sec16_C	Sec23-binding domain of Sec16	823	0.848	0.779	0.812	222
PF12936	Kri1_C	KRI1-like family C-terminal	824	0.982	0.934	0.957	228
PF12937	F-box-like	F-box-like	825	0.8	0.567	0.664	2364
PF12999	PRKCSH-like	Glucosidase II beta subunit-like	826	0.845	0.912	0.877	102
PF13019	Sde2_N_Ubi	Silencing defective 2 N-terminal ubiquitin domain	827	0.969	0.89	0.928	210
PF13020	DUF3883	Domain of unknown function (DUF3883)	828	0.544	0.312	0.396	138
PF13023	HD_3	HD domain	829	0.909	0.893	0.901	816
PF13086	AAA_11	AAA domain	830	0.899	0.826	0.861	1362
PF13088	BNR_2	BNR repeat-like domain	831	0.66	0.58	0.617	288
PF13091	PLDc_2	PLD-like domain	832	0.893	0.892	0.893	3486
PF13178	DUF4005	Protein of unknown function (DUF4005)	833	0.911	0.906	0.909	318
PF13180	PDZ_2	PDZ domain	834	0.882	0.881	0.882	3510
PF13193	AMP-binding_C	AMP-binding enzyme C-terminal domain	835	0.33	0.381	0.354	168
PF13202	EF-hand_5	EF hand	836	0.333	0.049	0.085	102
PF13225	DUF4033	Domain of unknown function (DUF4033)	837	0.806	0.877	0.84	114
PF13243	SQHop_cyclase_C	Squalene-hopene cyclase C-terminal domain	838	0.703	0.577	0.634	156
PF13249	SQHop_cyclase_N	Squalene-hopene cyclase N-terminal domain	839	0.812	0.591	0.684	66
PF13259	DUF4050	Protein of unknown function (DUF4050)	840	0.781	0.811	0.796	228
PF13266	DUF4057	Protein of unknown function (DUF4057)	841	0.909	0.778	0.838	90
PF13302	Acetyltransf_3	Acetyltransferase (GNAT) domain	842	0.461	0.428	0.444	456
PF13320	DUF4091	Domain of unknown function (DUF4091)	843	0.794	0.75	0.771	144
PF13328	HD_4	HD domain	844	0.939	0.958	0.949	1986
PF13355	DUF4101	Protein of unknown function (DUF4101)	845	0.9	0.844	0.871	96
PF13369	Transglut_core2	Transglutaminase-like superfamily	846	0.804	0.768	0.786	198
PF13378	MR_MLE_C	Enolase C-terminal domain-like	847	0.973	0.974	0.974	4194
PF13386	DsbD_2	Cytochrome C biogenesis protein transmembrane region	848	0.927	0.893	0.909	270
PF13393	tRNA-synt_His	Histidyl-tRNA synthetase	849	0.902	0.905	0.903	786
PF13401	AAA_22	AAA domain	850	0.583	0.103	0.175	204
PF13409	GST_N_2	Glutathione S-transferase, N-terminal domain	851	0.972	0.983	0.977	8034
PF13417	GST_N_3	Glutathione S-transferase, N-terminal domain	852	0.471	0.078	0.134	102
PF13422	DUF4110	Domain of unknown function (DUF4110)	853	0.986	0.944	0.965	144
PF13426	PAS_9	PAS domain	854	0.552	0.585	0.568	528
PF13439	Glyco_transf_4	Glycosyltransferase Family 4	855	1	0.008	0.016	126
PF13441	Gly-zipper_YMGG	YMGG-like Gly-zipper	856	0.965	0.983	0.974	420
PF13442	Cytochrome_CBB3	Cytochrome C oxidase, cbb3-type, subunit III	857	0.979	0.99	0.984	4830
PF13456	RVT_3	Reverse transcriptase-like	858	0.269	0.438	0.333	738
PF13460	NAD_binding_10	NAD(P)H-binding	859	0.679	0.636	0.656	1650
PF13462	Thioredoxin_4	Thioredoxin	860	0.837	0.776	0.805	330
PF13472	Lipase_GDSL_2	GDSL-like Lipase/Acylhydrolase family	861	0.547	0.169	0.258	936
PF13474	SnoaL_3	SnoaL-like domain	862	0.563	0.373	0.449	324
PF13499	EF-hand_7	EF-hand domain pair	863	0.667	0.145	0.238	138
PF13519	VWA_2	von Willebrand factor type A domain	864	0.828	0.286	0.425	168
PF13532	2OG-FeII_Oxy_2	2OG-Fe(II) oxygenase superfamily	865	0.923	0.922	0.922	1680
PF13570	PQQ_3	PQQ-like domain	866	0.826	0.858	0.842	1086
PF13579	Glyco_trans_4_4	Glycosyl transferase 4-like domain	867	0.697	0.378	0.49	360
PF13625	Helicase_C_3	Helicase conserved C-terminal domain	868	0.821	0.833	0.827	258
PF13632	Glyco_trans_2_3	Glycosyl transferase family group 2	869	0.863	0.656	0.745	270
PF13639	zf-RING_2	Ring finger domain	870	0.784	0.75	0.767	1452
PF13640	2OG-FeII_Oxy_3	2OG-Fe(II) oxygenase superfamily	871	0.831	0.857	0.844	1956
PF13649	Methyltransf_25	Methyltransferase domain	872	0.554	0.618	0.584	2004
PF13656	RNA_pol_L_2	RNA polymerase Rpb3/Rpb11 dimerisation domain	873	0.799	0.806	0.803	222
PF13664	DUF4149	Domain of unknown function (DUF4149)	874	0.803	0.797	0.8	276
PF13676	TIR_2	TIR domain	875	0.269	0.044	0.076	318
PF13679	Methyltransf_32	Methyltransferase domain	876	0.814	0.867	0.84	324
PF13691	Lactamase_B_4	tRNase Z endonuclease	877	0.871	0.893	0.882	318
PF13716	CRAL_TRIO_2	Divergent CRAL/TRIO domain	878	0.729	0.551	0.628	234
PF13720	Acetyltransf_11	Udp N-acetylglucosamine O-acyltransferase; Domain 2	879	0.994	0.993	0.994	714
PF13802	Gal_mutarotas_2	Galactose mutarotase-like	880	0.747	0.533	0.622	210
PF13840	ACT_7	ACT domain	881	0.803	0.821	0.812	486
PF13844	Glyco_transf_41	Glycosyl transferase family 41	882	0.878	0.838	0.857	240
PF13847	Methyltransf_31	Methyltransferase domain	883	0.538	0.206	0.298	660
PF13867	SAP30_Sin3_bdg	Sin3 binding region of histone deacetylase complex subunit SAP30	884	0.757	0.792	0.774	240
PF13878	zf-C2H2_3	zinc-finger of acetyl-transferase ESCO	885	0.815	0.791	0.803	234
PF13881	Rad60-SLD_2	Ubiquitin-2 like Rad60 SUMO-like	886	0.844	0.783	0.812	318
PF13891	zf-C3Hc3H	Potential DNA-binding domain	887	0.881	0.861	0.871	180
PF13902	R3H-assoc	R3H-associated N-terminal domain	888	0.792	0.728	0.759	162
PF13905	Thioredoxin_8	Thioredoxin-like	889	0.865	0.39	0.538	246
PF13906	AA_permease_C	C-terminus of AA_permease	890	0.98	0.929	0.954	378
PF13919	ASXH	Asx homology domain	891	0.777	0.627	0.694	150
PF13925	Katanin_con80	con80 domain of Katanin	892	0.859	0.828	0.843	198
PF13932	GIDA_assoc	GidA associated domain	893	0.987	0.976	0.982	1182
PF13943	WPP	WPP domain	894	0.922	0.865	0.892	96
PF13947	GUB_WAK_bind	Wall-associated receptor kinase galacturonan-binding	895	0.642	0.574	0.606	216
PF13961	DUF4219	Domain of unknown function (DUF4219)	896	0.522	0.456	0.487	180
PF13962	PGG	Domain of unknown function	897	0.633	0.679	0.656	234
PF13966	zf-RVT	zinc-binding in reverse transcriptase	898	0.625	0.743	0.679	432
PF13968	DUF4220	Domain of unknown function (DUF4220)	899	0.866	0.889	0.877	576
PF13976	gag_pre-integrs	GAG-pre-integrase domain	900	0.416	0.399	0.408	348
PF14111	DUF4283	Domain of unknown function (DUF4283)	901	0.459	0.385	0.419	486
PF14159	CAAD	CAAD domains of cyanobacterial aminoacyl-tRNA synthetase	902	0.941	0.941	0.941	204
PF14204	Ribosomal_L18_c	Ribosomal L18 C-terminal region	903	0.983	0.92	0.951	324
PF14215	bHLH-MYC_N	bHLH-MYC and R2R3-MYB transcription factors N-terminal	904	0.853	0.853	0.853	300
PF14222	MOR2-PAG1_N	Cell morphogenesis N-terminal	905	0.5	0.233	0.318	30
PF14226	DIOX_N	non-haem dioxygenase in morphine synthesis N-terminal	906	0.427	0.309	0.358	246
PF14237	GYF_2	GYF domain 2	907	0.683	0.644	0.663	348
PF14244	Retrotran_gag_3	gag-polypeptide of LTR copia-type	908	0.655	0.667	0.661	384
PF14279	HNH_5	HNH endonuclease	909	0.583	0.333	0.424	42
PF14303	NAM-associated	No apical meristem-associated C-terminal domain	910	0.7	0.632	0.664	258
PF14309	DUF4378	Domain of unknown function (DUF4378)	911	0.901	0.855	0.877	330
PF14360	PAP2_C	PAP2 superfamily C-terminal	912	0.879	0.89	0.885	336
PF14363	AAA_assoc	Domain associated at C-terminal with AAA	913	0.364	0.133	0.195	30
PF14364	DUF4408	Domain of unknown function (DUF4408)	914	0.865	0.907	0.886	162
PF14368	LTP_2	Probable lipid transfer	915	0.656	0.171	0.271	246
PF14372	DUF4413	Domain of unknown function (DUF4413)	916	0.532	0.33	0.407	306
PF14374	Ribos_L4_asso_C	60S ribosomal protein L4 C-terminal domain	917	0.964	0.941	0.953	288
PF14379	Myb_CC_LHEQLE	MYB-CC type transfactor, LHEQLE motif	918	0.787	0.583	0.67	108
PF14380	WAK_assoc	Wall-associated receptor kinase C-terminal	919	0.784	0.864	0.822	198
PF14383	VARLMGL	DUF761-associated sequence motif	920	0.593	0.53	0.56	132
PF14416	PMR5N	PMR5 N terminal Domain	921	0.98	0.958	0.969	780
PF14432	DYW_deaminase	DYW family of nucleic acid deaminases	922	0.96	0.955	0.957	1518
PF14498	Glyco_hyd_65N_2	Glycosyl hydrolase family 65, N-terminal domain	923	0.884	0.847	0.865	216
PF14543	TAXi_N	Xylanase inhibitor N-terminal	924	0.846	0.749	0.794	366
PF14547	Hydrophob_seed	Hydrophobic seed protein	925	0.882	0.827	0.854	162
PF14560	Ubiquitin_2	Ubiquitin-like domain	926	0.873	0.749	0.806	414
PF14629	ORC4_C	Origin recognition complex (ORC) subunit 4 C-terminus	927	0.765	0.197	0.313	66
PF14634	zf-RING_5	zinc-RING finger domain	928	0.947	0.577	0.717	246
PF14655	RAB3GAP2_N	Rab3 GTPase-activating protein regulatory subunit N-terminus	929	0.66	0.431	0.521	72
PF14661	HAUS6_N	HAUS augmin-like complex subunit 6 N-terminus	930	0.845	0.849	0.847	186
PF14693	Ribosomal_TL5_C	Ribosomal protein TL5, C-terminal domain	931	0.97	0.978	0.974	1044
PF14703	PHM7_cyt	Cytosolic domain of 10TM putative phosphate transporter	932	0.5	0.333	0.4	54
PF14780	DUF4477	Domain of unknown function (DUF4477)	933	0.765	0.802	0.783	126
PF14833	NAD_binding_11	NAD-binding of NADP-dependent 3-hydroxyisobutyrate dehydrogenase	934	0.308	0.095	0.145	42
PF14870	PSII_BNR	Photosynthesis system II assembly factor YCF48	935	0.875	0.762	0.815	294
PF15477	SMAP	Small acidic protein family	936	0.892	0.82	0.854	222
PF15511	CENP-T_C	Centromere kinetochore component CENP-T histone fold	937	0.906	0.877	0.892	408
PF15612	WHIM1	WSTF, HB1, Itc1p, MBD9 motif 1	938	0.794	0.776	0.785	228
PF15628	RRM_DME	RRM in Demeter	939	0.722	0.619	0.667	42
PF15862	Coilin_N	Coilin N-terminus	940	0.854	0.844	0.849	90
PF15963	Myb_DNA-bind_7	Myb DNA-binding like	941	0.824	0.737	0.778	114
PF15982	TMEM135_C_rich	N-terminal cysteine-rich region of Transmembrane protein 135	942	0.868	0.88	0.874	150
PF15985	KH_6	KH domain	943	0.868	0.89	0.878	390
PF16035	Chalcone_2	Chalcone isomerase like	944	0.815	0.803	0.809	198
PF16095	COR	C-terminal of Roc, COR, domain	945	0.644	0.486	0.554	138
PF16158	N_BRCA1_IG	Ig-like domain from next to BRCA1 gene	946	0.87	0.707	0.78	246
PF16205	Ribosomal_S17_N	Ribosomal_S17 N-terminal	947	0.954	0.936	0.945	264
PF16212	PhoLip_ATPase_C	Phospholipid-translocating P-type ATPase C-terminal	948	0.969	0.944	0.956	1206
PF16278	zf-C2HE	C2HE / C2H2 / C2HC zinc-binding finger	949	0.92	0.885	0.902	156
PF16282	SANT_DAMP1_like	SANT/Myb-like domain of DAMP1	950	0.951	0.933	0.942	210
PF16363	GDP_Man_Dehyd	GDP-mannose 4,6 dehydratase	951	0.475	0.127	0.2	150
PF16421	E2F_CC-MB	E2F transcription factor CC-MB domain	952	0.901	0.905	0.903	390
PF16455	UBD	Ubiquitin-binding domain	953	0.949	0.856	0.9	174
PF16486	ArgoN	N-terminal domain of argonaute	954	0.936	0.939	0.938	1002
PF16528	Exo84_C	Exocyst component 84 C-terminal	955	0.849	0.846	0.847	246
PF16561	AMPK1_CBM	Glycogen recognition site of AMP-activated protein kinase	956	0.866	0.607	0.714	234
PF16575	CLP1_P	mRNA cleavage and polyadenylation factor CLP1 P-loop	957	0.908	0.853	0.88	510
PF16656	Pur_ac_phosph_N	Purple acid Phosphatase, N-terminal domain	958	0.667	0.056	0.103	72
PF16679	CDT1_C	DNA replication factor Cdt1 C-terminal domain	959	0.836	0.851	0.844	222
PF16740	SKA2	Spindle and kinetochore-associated protein 2	960	0.539	0.767	0.633	90
PF16845	SQAPI	Aspartic acid proteinase inhibitor	961	0.698	0.455	0.55	66
PF16860	CX9C	CHCH-CHCH-like Cx9C, IMS import disulfide relay-system,	962	0.742	0.885	0.807	78
PF16863	NtCtMGAM_N	N-terminal barrel of NtMGAM and CtMGAM, maltase-glucoamylase	963	0.938	0.875	0.905	432
PF16884	ADH_N_2	N-terminal domain of oxidoreductase	964	0.714	0.312	0.435	48
PF16900	REPA_OB_2	Replication protein A OB domain	965	0.286	0.028	0.051	72
PF16916	ZT_dimer	Dimerisation domain of Zinc Transporter	966	0.952	0.906	0.929	330
PF16953	PRORP	Protein-only RNase P	967	0.823	0.849	0.836	186
PF16987	KIX_2	KIX domain	968	0.754	0.647	0.697	156
PF17032	zinc_ribbon_15	zinc-ribbon family	969	0.843	0.86	0.851	150
PF17035	BET	Bromodomain extra-terminal - transcription regulation	970	0.849	0.47	0.605	132
PF17135	Ribosomal_L18	Ribosomal protein 60S L18 and 50S L18e	971	0.907	0.919	0.913	372
PF17137	DUF5110	Domain of unknown function (DUF5110)	972	0.82	0.878	0.848	576
PF17171	GST_C_6	Glutathione S-transferase, C-terminal domain	973	0.635	0.435	0.516	108
PF17172	GST_N_4	Glutathione S-transferase N-terminal domain	974	0.675	0.375	0.482	72
PF17177	PPR_long	Pentacotripeptide-repeat region of PRORP	975	0.821	0.872	0.846	750
PF17766	fn3_6	Fibronectin type-III domain	976	0.442	0.383	0.411	60
PF17777	RL10P_insert	Insertion domain in 60S ribosomal protein L10P	977	0.913	0.946	0.929	576
PF17780	OCRE	OCRE domain	978	0.783	0.545	0.643	132
PF17781	RPN1_RPN2_N	RPN1/RPN2 N-terminal domain	979	0.98	0.92	0.949	324
PF17801	Melibiase_C	Alpha galactosidase C-terminal beta sandwich domain	980	0.9	0.879	0.89	852
PF17815	PDZ_3	PDZ domain	981	0	0	0	24
PF17846	XRN_M	Xrn1 helical domain	982	0.609	0.212	0.315	66
PF17855	MCM_lid	MCM AAA-lid domain	983	0.94	0.903	0.921	750
PF17862	AAA_lid_3	AAA+ lid domain	984	0.273	0.036	0.063	84
PF17863	AAA_lid_2	AAA lid domain	985	0.908	0.717	0.801	180
PF17874	TPR_MalT	MalT-like TPR region	986	0.765	0.905	0.829	1866
PF17903	KH_8	Krr1 KH1 domain	987	0.944	0.938	0.941	306
PF17942	Morc6_S5	Morc6 ribosomal protein S5 domain 2-like	988	0.924	0.863	0.893	366
PF17958	EF-hand_13	EF-hand domain	989	0.941	0.893	0.916	252
PF18036	Ubiquitin_4	Ubiquitin-like domain	990	0.812	0.659	0.728	138
PF18137	ORC_WH_C	Origin recognition complex winged helix C-terminal	991	0.808	0.833	0.82	222
PF18265	Nas2_N	Nas2 N_terminal domain	992	0.848	0.778	0.812	144
PF18266	Ncstrn_small	Nicastrin small lobe	993	0.888	0.817	0.851	126
PF18511	F-box_5	F-box	994	0.935	0.779	0.85	222
PF18826	bVLRF1	Bacteroidetes VLRF1 release factor	995	0.887	0.899	0.893	228
