# Supplementary material for: Functional annotation of proteins for signaling network inference in non-model species
Source: Research Square preprint supplement (doi:10.21203/rs.3.rs-2201240/v1), 2022-11-11
Supplement: Supplementary file 6 [file a4cbb64f06ead6a62b3fbc49.xlsx]

## Sheet: Network Regulations-2022-06-29
Supplementary Table S8 - Network regulations upon cold and controled conditions in soybean. Causal regulations between phosphorylated proteins were identified using NetPhorce. The pipeline leverages a time course to infer causal regulation based on dynamics Bayesion principles (see methods for more information).
condition	target	target_name	regulator	regulator_name	timelapse	regulation	BDei
Cold	Glyma.01G036700.1_S182_1	Glyma.01G036700_S182	Glyma.10G173000.1_S334_1	TOI5_S334	tl.1	undetermined	2.05761e-18
Cold	Glyma.01G089300.1_S512_1	CHUP1_S512	Glyma.07G046800.1_S364_1	SRF6_S364	tl.0	dephosphorylation	8.16513e-36
Cold	Glyma.01G089300.1_S512_1	CHUP1_S512	Glyma.08G037300.1_T220_1	CDKF;1_T220	tl.0	undetermined	8.16513e-36
Cold	Glyma.01G089300.1_S512_1	CHUP1_S512	Glyma.19G007300.1_S335_1	TOT3_S335	tl.0	dephosphorylation	8.16513e-36
Cold	Glyma.01G209200.1_S1368_1	MNJ7.8_S1368	Glyma.10G173000.1_S334_1	TOI5_S334	tl.1	dephosphorylation	4.11523e-18
Cold	Glyma.02G000200.1_T439_1	T15P17.7_T439	Glyma.10G173000.1_S334_1	TOI5_S334	tl.0	phosphorylation	0.111111
Cold	Glyma.02G022800.1_S302_1	Glyma.02G022800_S302	Glyma.10G173000.1_S334_1	TOI5_S334	tl.0	phosphorylation	6.17284e-19
Cold	Glyma.02G039400.1_S394_1	T23K23.25_S394	Glyma.07G046800.1_S364_1	SRF6_S364	tl.1	dephosphorylation	0.333333
Cold	Glyma.02G044000.1_T156_1	Glyma.02G044000_T156	Glyma.10G173000.1_S334_1	TOI5_S334	tl.1	dephosphorylation	4.11523e-19
Cold	Glyma.02G082800.1_S99_1	VIP1_S99_1	Glyma.07G046800.1_S364_1	SRF6_S364	tl.0	undetermined	6.85871e-19
Cold	Glyma.02G082800.1_S99_1	VIP1_S99_1	Glyma.10G173000.1_S334_1	TOI5_S334	tl.1	dephosphorylation	6.85871e-19
Cold	Glyma.02G082800.1_S99_1	VIP1_S99_1	Glyma.19G007300.1_S335_1	TOT3_S335	tl.0	phosphorylation	6.85871e-19
Cold	Glyma.02G144400.1_S63_1	AtIDD12_S63	Glyma.08G037300.1_T220_1	CDKF;1_T220	tl.0	undetermined	0.333333
Cold	Glyma.02G144400.1_S63_1	AtIDD12_S63	Glyma.19G007300.1_S335_1	TOT3_S335	tl.0	phosphorylation	0.333333
Cold	Glyma.02G220700.1_S235_1	ATG13_S235	Glyma.10G173000.1_S334_1	TOI5_S334	tl.0	phosphorylation	2.46914e-18
Cold	Glyma.02G228700.1_S265_1	F2KP_S265	Glyma.10G173000.1_S334_1	TOI5_S334	tl.0	dephosphorylation	2.05761e-18
Cold	Glyma.02G228700.1_S265_1	F2KP_S265	Glyma.10G173000.1_S334_1	TOI5_S334	tl.1	dephosphorylation	2.05761e-18
Cold	Glyma.02G228700.1_S265_1	F2KP_S265	Glyma.19G007300.1_S335_1	TOT3_S335	tl.0	undetermined	2.05761e-18
Cold	Glyma.02G251100.1_S77_1	P5CS2_S77	Glyma.07G046800.1_S364_1	SRF6_S364	tl.0	phosphorylation	4.11523e-18
Cold	Glyma.02G295100.1_S581_1	ATMAP65-1_S581	Glyma.07G046800.1_S364_1	SRF6_S364	tl.0	phosphorylation	4.11523e-18
Cold	Glyma.02G295100.1_S581_2	ATMAP65-1_S581	Glyma.19G007300.1_S335_1	TOT3_S335	tl.1	phosphorylation	0.333333
Cold	Glyma.02G311300.1_S590_2	Glyma.02G311300_S590	Glyma.10G173000.1_S334_1	TOI5_S334	tl.0	dephosphorylation	6.17284e-19
Cold	Glyma.02G311300.1_S596_1	Glyma.02G311300_S596	Glyma.19G007300.1_S335_1	TOT3_S335	tl.0	undetermined	5.14403e-19
Cold	Glyma.02G311300.1_S596_2	Glyma.02G311300_S596	Glyma.10G173000.1_S334_1	TOI5_S334	tl.0	dephosphorylation	6.17284e-19
Cold	Glyma.03G167100.1_S269_1	Glyma.03G167100_S269	Glyma.06G161200.1_S496_1	CPK4_S496	tl.1	dephosphorylation	0.111111
Cold	Glyma.03G167100.1_S269_1	Glyma.03G167100_S269	Glyma.10G173000.1_S334_1	TOI5_S334	tl.0	phosphorylation	0.111111
Cold	Glyma.04G021900.1_S465_1	LARP1c_S465	Glyma.19G007300.1_S335_1	TOT3_S335	tl.1	phosphorylation	0.333333
Cold	Glyma.04G061700.1_S310_1	PDS5C_S310	Glyma.10G173000.1_S334_1	TOI5_S334	tl.0	phosphorylation	0.037037
Cold	Glyma.04G061700.1_S310_1	PDS5C_S310	Glyma.10G173000.1_S334_1	TOI5_S334	tl.1	dephosphorylation	0.037037
Cold	Glyma.04G185000.1_S831_1	T24C20.80_S831	Glyma.06G161200.1_S496_1	CPK4_S496	tl.1	dephosphorylation	5.87889e-19
Cold	Glyma.04G185000.1_S831_1	T24C20.80_S831	Glyma.19G007300.1_S335_1	TOT3_S335	tl.0	phosphorylation	5.87889e-19
Cold	Glyma.04G217100.1_S146_1	Atalba1_S146	Glyma.06G161200.1_S496_1	CPK4_S496	tl.1	dephosphorylation	0.111111
Cold	Glyma.05G054700.1_T31_1	F5O11.25_T31	Glyma.19G007300.1_S335_1	TOT3_S335	tl.0	phosphorylation	4.11523e-18
Cold	Glyma.05G168100.1_S348_1	Glyma.05G168100_S348	Glyma.10G173000.1_S334_1	TOI5_S334	tl.1	phosphorylation	0.111111
Cold	Glyma.06G008300.1_S1005_1	Glyma.06G008300_S1005	Glyma.19G007300.1_S335_1	TOT3_S335	tl.1	dephosphorylation	0.333333
Cold	Glyma.06G063400.1_S23_1	PKL_S23	Glyma.10G173000.1_S334_1	TOI5_S334	tl.0	dephosphorylation	2.05761e-18
Cold	Glyma.06G063400.1_S23_1	PKL_S23	Glyma.10G173000.1_S334_1	TOI5_S334	tl.1	phosphorylation	2.05761e-18
Cold	Glyma.06G063400.1_S23_1	PKL_S23	Glyma.19G007300.1_S335_1	TOT3_S335	tl.0	dephosphorylation	2.05761e-18
Cold	Glyma.06G127600.1_S1132_1	MYN8.5_S1132	Glyma.10G173000.1_S334_1	TOI5_S334	tl.0	phosphorylation	0.037037
Cold	Glyma.06G127600.1_S1132_1	MYN8.5_S1132	Glyma.10G173000.1_S334_1	TOI5_S334	tl.1	dephosphorylation	0.037037
Cold	Glyma.06G148800.1_S146_1	Atalba1_S146	Glyma.19G007300.1_S335_1	TOT3_S335	tl.0	phosphorylation	0.333333
Cold	Glyma.06G161200.1_S496_1	CPK4_S496	Glyma.10G173000.1_S334_1	TOI5_S334	tl.0	dephosphorylation	2.05761e-18
Cold	Glyma.06G216700.1_S45_1	ATNUDT19_S45	Glyma.07G046800.1_S364_1	SRF6_S364	tl.0	phosphorylation	4.11523e-18
Cold	Glyma.06G216700.1_S45_1	ATNUDT19_S45	Glyma.08G037300.1_T220_1	CDKF;1_T220	tl.0	undetermined	4.11523e-18
Cold	Glyma.06G216700.1_S45_1	ATNUDT19_S45	Glyma.10G173000.1_S334_1	TOI5_S334	tl.0	phosphorylation	4.11523e-18
Cold	Glyma.06G216700.1_S45_1	ATNUDT19_S45	Glyma.10G173000.1_S334_1	TOI5_S334	tl.1	dephosphorylation	4.11523e-18
Cold	Glyma.06G216700.1_S45_1	ATNUDT19_S45	Glyma.19G007300.1_S335_1	TOT3_S335	tl.0	phosphorylation	4.11523e-18
Cold	Glyma.07G003600.1_S750_1	EXO84B_S750	Glyma.19G007300.1_S335_1	TOT3_S335	tl.0	phosphorylation	0.333333
Cold	Glyma.07G046500.1_S24_1	F20D23.3_S24	Glyma.10G173000.1_S334_1	TOI5_S334	tl.0	phosphorylation	4.11523e-18
Cold	Glyma.07G055900.1_S1727_1	Glyma.07G055900_S1727	Glyma.07G046800.1_S364_1	SRF6_S364	tl.0	phosphorylation	0.111111
Cold	Glyma.07G055900.1_S1727_1	Glyma.07G055900_S1727	Glyma.10G173000.1_S334_1	TOI5_S334	tl.1	dephosphorylation	0.111111
Cold	Glyma.07G055900.1_S1727_1	Glyma.07G055900_S1727	Glyma.19G007300.1_S335_1	TOT3_S335	tl.0	undetermined	0.111111
Cold	Glyma.07G055900.1_S1727_1	Glyma.07G055900_S1727	Glyma.19G007300.1_S335_1	TOT3_S335	tl.1	dephosphorylation	0.111111
Cold	Glyma.07G070900.1_S180_2	BUD13_S180	Glyma.19G007300.1_S335_1	TOT3_S335	tl.1	phosphorylation	3.7037e-18
Cold	Glyma.07G202100.1_S976_1	Glyma.07G202100_S976	Glyma.19G007300.1_S335_1	TOT3_S335	tl.1	dephosphorylation	4.40917e-20
Cold	Glyma.07G224200.1_S184_2	DRT111_S184	Glyma.06G161200.1_S496_1	CPK4_S496	tl.0	undetermined	1.37174e-18
Cold	Glyma.07G224200.1_S184_2	DRT111_S184	Glyma.10G173000.1_S334_1	TOI5_S334	tl.1	phosphorylation	1.37174e-18
Cold	Glyma.07G224200.1_S186_2	DRT111_S186	Glyma.06G161200.1_S496_1	CPK4_S496	tl.0	undetermined	1.37174e-18
Cold	Glyma.07G224200.1_S186_2	DRT111_S186	Glyma.10G173000.1_S334_1	TOI5_S334	tl.1	phosphorylation	1.37174e-18
Cold	Glyma.08G026700.1_S1075_1	Glyma.08G026700_S1075	Glyma.10G173000.1_S334_1	TOI5_S334	tl.0	dephosphorylation	2.46914e-18
Cold	Glyma.08G037300.1_T220_1	CDKF;1_T220	Glyma.10G173000.1_S334_1	TOI5_S334	tl.1	undetermined	0.111111
Cold	Glyma.08G171800.1_S84_1	PAT1_S84	Glyma.10G173000.1_S334_1	TOI5_S334	tl.1	phosphorylation	0.111111
Cold	Glyma.08G288600.1_S5_1	ATTPS10_S5	Glyma.08G037300.1_T220_1	CDKF;1_T220	tl.0	dephosphorylation	0.333333
Cold	Glyma.09G018600.1_S13_1	ATFRO6_S13	Glyma.06G161200.1_S496_1	CPK4_S496	tl.1	dephosphorylation	0.111111
Cold	Glyma.09G018600.1_S13_1	ATFRO6_S13	Glyma.10G173000.1_S334_1	TOI5_S334	tl.0	phosphorylation	0.111111
Cold	Glyma.09G131500.1_S219_1	HSP81-1_S219	Glyma.06G161200.1_S496_1	CPK4_S496	tl.1	phosphorylation	1.23457e-17
Cold	Glyma.10G082400.1_S8_1	SYP121_S8	Glyma.10G173000.1_S334_1	TOI5_S334	tl.1	phosphorylation	4.11523e-19
Cold	Glyma.10G132800.1_S138_1	YUP8H12.24_S138	Glyma.06G161200.1_S496_1	CPK4_S496	tl.0	phosphorylation	1.23457e-17
Cold	Glyma.10G173000.1_S334_1	TOI5_S334	Glyma.07G046800.1_S364_1	SRF6_S364	tl.0	dephosphorylation	1.46972e-19
Cold	Glyma.10G173000.1_S334_1	TOI5_S334	Glyma.19G007300.1_S335_1	TOT3_S335	tl.0	dephosphorylation	1.46972e-19
Cold	Glyma.10G217200.1_S164_1	SEC5A_S164	Glyma.19G007300.1_S335_1	TOT3_S335	tl.0	phosphorylation	0.333333
Cold	Glyma.10G250400.1_S143_1	RANGAP2_S143	Glyma.10G173000.1_S334_1	TOI5_S334	tl.1	undetermined	0.111111
Cold	Glyma.11G076700.1_S206_1	GAS41_S206	Glyma.08G037300.1_T220_1	CDKF;1_T220	tl.0	dephosphorylation	5.14403e-19
Cold	Glyma.11G076700.1_S206_1	GAS41_S206	Glyma.19G007300.1_S335_1	TOT3_S335	tl.0	undetermined	5.14403e-19
Cold	Glyma.11G101600.1_S319_1	Glyma.11G101600_S319	Glyma.10G173000.1_S334_1	TOI5_S334	tl.1	dephosphorylation	0.111111
Cold	Glyma.11G105500.1_S120_1	ATTOC132_S120	Glyma.07G046800.1_S364_1	SRF6_S364	tl.0	undetermined	4.11523e-18
Cold	Glyma.11G105500.1_S120_1	ATTOC132_S120	Glyma.08G037300.1_T220_1	CDKF;1_T220	tl.0	phosphorylation	4.11523e-18
Cold	Glyma.11G105500.1_S120_1	ATTOC132_S120	Glyma.19G007300.1_S335_1	TOT3_S335	tl.0	phosphorylation	4.11523e-18
Cold	Glyma.11G114600.1_S189_1	MUG13.13_S189	Glyma.06G161200.1_S496_1	CPK4_S496	tl.1	phosphorylation	4.11523e-18
Cold	Glyma.11G114600.1_S189_1	MUG13.13_S189	Glyma.10G173000.1_S334_1	TOI5_S334	tl.0	dephosphorylation	4.11523e-18
Cold	Glyma.12G059700.1_S604_1	F16P2.41_S604	Glyma.10G173000.1_S334_1	TOI5_S334	tl.1	dephosphorylation	2.05761e-18
Cold	Glyma.12G129800.1_S5_1	ATTPS7_S5	Glyma.06G161200.1_S496_1	CPK4_S496	tl.0	phosphorylation	1.23457e-17
Cold	Glyma.12G194000.1_S34_1	MIL23.25_S34	Glyma.06G161200.1_S496_1	CPK4_S496	tl.0	undetermined	1.37174e-18
Cold	Glyma.12G194000.1_S34_1	MIL23.25_S34	Glyma.10G173000.1_S334_1	TOI5_S334	tl.1	phosphorylation	1.37174e-18
Cold	Glyma.12G235000.1_S728_1	DRA2_S728	Glyma.10G173000.1_S334_1	TOI5_S334	tl.0	dephosphorylation	6.17284e-19
Cold	Glyma.12G237000.1_S160_2	ELI1_S160	Glyma.19G007300.1_S335_1	TOT3_S335	tl.0	phosphorylation	4.11523e-18
Cold	Glyma.12G237000.1_S189_1	ELI1_S189	Glyma.10G173000.1_S334_1	TOI5_S334	tl.0	phosphorylation	6.17284e-19
Cold	Glyma.13G027300.1_S171_1	T9I1.1_S171	Glyma.06G161200.1_S496_1	CPK4_S496	tl.1	phosphorylation	1.23457e-17
Cold	Glyma.13G221300.1_S457_1	PTAC12_S457	Glyma.10G173000.1_S334_1	TOI5_S334	tl.1	phosphorylation	0.111111
Cold	Glyma.13G221300.1_S457_1	PTAC12_S457	Glyma.19G007300.1_S335_1	TOT3_S335	tl.1	phosphorylation	0.111111
Cold	Glyma.13G302200.1_S363_1	Glyma.13G302200_S363	Glyma.19G007300.1_S335_1	TOT3_S335	tl.1	phosphorylation	0.333333
Cold	Glyma.13G360300.1_T443_2	F19K6.4_T443	Glyma.06G161200.1_S496_1	CPK4_S496	tl.0	phosphorylation	8.81834e-20
Cold	Glyma.13G372100.1_S39_1	CAX2_S39	Glyma.06G161200.1_S496_1	CPK4_S496	tl.1	undetermined	4.40917e-20
Cold	Glyma.14G001200.1_S809_2	AtEH2_S809	Glyma.10G173000.1_S334_1	TOI5_S334	tl.0	dephosphorylation	0.037037
Cold	Glyma.14G001200.1_S809_2	AtEH2_S809	Glyma.10G173000.1_S334_1	TOI5_S334	tl.1	phosphorylation	0.037037
Cold	Glyma.14G001200.1_S813_2	AtEH2_S813	Glyma.10G173000.1_S334_1	TOI5_S334	tl.0	dephosphorylation	0.037037
Cold	Glyma.14G001200.1_S813_2	AtEH2_S813	Glyma.10G173000.1_S334_1	TOI5_S334	tl.1	phosphorylation	0.037037
Cold	Glyma.14G029100.1_S123_1	ATSPS3F_S123	Glyma.06G161200.1_S496_1	CPK4_S496	tl.1	undetermined	0.111111
Cold	Glyma.14G029100.1_S123_1	ATSPS3F_S123	Glyma.10G173000.1_S334_1	TOI5_S334	tl.0	phosphorylation	0.111111
Cold	Glyma.14G029100.1_S153_1	ATSPS3F_S153	Glyma.10G173000.1_S334_1	TOI5_S334	tl.0	phosphorylation	0.111111
Cold	Glyma.14G095300.1_S76_1	T19L18.8_S76	Glyma.19G007300.1_S335_1	TOT3_S335	tl.0	phosphorylation	4.11523e-18
Cold	Glyma.15G023600.1_S245_1	T7N22.12_S245	Glyma.06G161200.1_S496_1	CPK4_S496	tl.1	phosphorylation	0.111111
Cold	Glyma.15G052400.1_T210_1	LHCB6_T210	Glyma.19G007300.1_S335_1	TOT3_S335	tl.1	phosphorylation	0.333333
Cold	Glyma.15G120300.1_S1363_1	PDS5_S1363	Glyma.07G046800.1_S364_1	SRF6_S364	tl.1	undetermined	0.333333
Cold	Glyma.15G120300.1_S1363_1	PDS5_S1363	Glyma.08G037300.1_T220_1	CDKF;1_T220	tl.1	phosphorylation	0.333333
Cold	Glyma.15G120300.1_S1363_1	PDS5_S1363	Glyma.19G007300.1_S335_1	TOT3_S335	tl.1	phosphorylation	0.333333
Cold	Glyma.15G120300.1_S1647_1	PDS5_S1647	Glyma.06G161200.1_S496_1	CPK4_S496	tl.0	undetermined	1.23457e-17
Cold	Glyma.15G163700.1_S807_1	VLN4_S807_2	Glyma.07G046800.1_S364_1	SRF6_S364	tl.0	undetermined	1.46972e-19
Cold	Glyma.15G163700.1_S807_1	VLN4_S807_2	Glyma.08G037300.1_T220_1	CDKF;1_T220	tl.0	undetermined	1.46972e-19
Cold	Glyma.15G163700.1_S807_1	VLN4_S807_2	Glyma.19G007300.1_S335_1	TOT3_S335	tl.0	dephosphorylation	1.46972e-19
Cold	Glyma.15G167500.1_S26_1	ACA8_S26	Glyma.10G173000.1_S334_1	TOI5_S334	tl.0	dephosphorylation	2.05761e-18
Cold	Glyma.15G253700.1_T95_1	PSBR_T95	Glyma.06G161200.1_S496_1	CPK4_S496	tl.0	dephosphorylation	1.23457e-17
Cold	Glyma.15G254100.1_S269_1	T20N10.10_S269	Glyma.19G007300.1_S335_1	TOT3_S335	tl.1	phosphorylation	0.333333
Cold	Glyma.15G255400.1_S98_1	SR45_S98	Glyma.19G007300.1_S335_1	TOT3_S335	tl.0	dephosphorylation	4.11523e-18
Cold	Glyma.16G003900.1_S318_1	ENOR3L4_S318	Glyma.10G173000.1_S334_1	TOI5_S334	tl.0	undetermined	6.17284e-19
Cold	Glyma.16G011100.1_S15_1	T10D10.12_S15	Glyma.07G046800.1_S364_1	SRF6_S364	tl.0	undetermined	0.333333
Cold	Glyma.16G042600.1_S383_1	Glyma.16G042600_S383	Glyma.10G173000.1_S334_1	TOI5_S334	tl.0	phosphorylation	2.46914e-18
Cold	Glyma.16G165800.1_T41_1	LHB1B1_T41	Glyma.06G161200.1_S496_1	CPK4_S496	tl.1	undetermined	1.23457e-17
Cold	Glyma.16G220500.1_S14_1	ATH9_S14	Glyma.10G173000.1_S334_1	TOI5_S334	tl.0	dephosphorylation	0.111111
Cold	Glyma.17G096100.1_S5_1	AHA11_S5	Glyma.19G007300.1_S335_1	TOT3_S335	tl.1	phosphorylation	0.333333
Cold	Glyma.17G096100.1_T889_1	AHA11_T889	Glyma.10G173000.1_S334_1	TOI5_S334	tl.1	undetermined	0.111111
Cold	Glyma.17G103100.1_S2_1	EIF-5A_S2	Glyma.06G161200.1_S496_1	CPK4_S496	tl.1	phosphorylation	9.79816e-20
Cold	Glyma.17G103100.1_S2_1	EIF-5A_S2	Glyma.07G046800.1_S364_1	SRF6_S364	tl.0	undetermined	9.79816e-20
Cold	Glyma.17G103100.1_S2_1	EIF-5A_S2	Glyma.08G037300.1_T220_1	CDKF;1_T220	tl.0	dephosphorylation	9.79816e-20
Cold	Glyma.17G103100.1_S2_1	EIF-5A_S2	Glyma.19G007300.1_S335_1	TOT3_S335	tl.0	dephosphorylation	9.79816e-20
Cold	Glyma.17G129700.1_S214_1	ATEXO70F1_S214	Glyma.10G173000.1_S334_1	TOI5_S334	tl.1	undetermined	0.111111
Cold	Glyma.17G199200.1_T883_1	AHA5_T883	Glyma.19G007300.1_S335_1	TOT3_S335	tl.0	undetermined	4.11523e-18
Cold	Glyma.17G256900.1_S982_1	TCS1_S982	Glyma.19G007300.1_S335_1	TOT3_S335	tl.0	undetermined	5.14403e-19
Cold	Glyma.18G019700.1_S343_1	Glyma.18G019700_S343	Glyma.19G007300.1_S335_1	TOT3_S335	tl.1	dephosphorylation	0.333333
Cold	Glyma.18G137100.1_S9_1	SPDS1_S9	Glyma.10G173000.1_S334_1	TOI5_S334	tl.0	phosphorylation	2.46914e-18
Cold	Glyma.18G207900.1_S47_1	PATL6_S47	Glyma.07G046800.1_S364_1	SRF6_S364	tl.0	phosphorylation	0.111111
Cold	Glyma.18G207900.1_S47_1	PATL6_S47	Glyma.07G046800.1_S364_1	SRF6_S364	tl.1	dephosphorylation	0.111111
Cold	Glyma.18G207900.1_S47_1	PATL6_S47	Glyma.08G037300.1_T220_1	CDKF;1_T220	tl.0	phosphorylation	0.111111
Cold	Glyma.18G207900.1_S47_1	PATL6_S47	Glyma.08G037300.1_T220_1	CDKF;1_T220	tl.1	dephosphorylation	0.111111
Cold	Glyma.18G207900.1_S47_1	PATL6_S47	Glyma.10G173000.1_S334_1	TOI5_S334	tl.0	phosphorylation	0.111111
Cold	Glyma.18G207900.1_S47_1	PATL6_S47	Glyma.19G007300.1_S335_1	TOT3_S335	tl.0	phosphorylation	0.111111
Cold	Glyma.18G207900.1_S47_1	PATL6_S47	Glyma.19G007300.1_S335_1	TOT3_S335	tl.1	dephosphorylation	0.111111
Cold	Glyma.19G007300.1_S335_1	TOT3_S335	Glyma.06G161200.1_S496_1	CPK4_S496	tl.1	phosphorylation	0.111111
Cold	Glyma.19G099000.1_T129_1	Glyma.19G099000_T129	Glyma.08G037300.1_T220_1	CDKF;1_T220	tl.0	phosphorylation	0.333333
Cold	Glyma.19G099000.1_T129_1	Glyma.19G099000_T129	Glyma.19G007300.1_S335_1	TOT3_S335	tl.0	phosphorylation	0.333333
Cold	Glyma.19G150300.1_S507_1	Kin7.5_S507	Glyma.08G037300.1_T220_1	CDKF;1_T220	tl.1	dephosphorylation	0.333333
Cold	Glyma.19G217400.1_S138_1	Glyma.19G217400_S138	Glyma.06G161200.1_S496_1	CPK4_S496	tl.0	dephosphorylation	1.17578e-19
Cold	Glyma.19G246000.1_S128_1	F20D21.28_S128	Glyma.07G046800.1_S364_1	SRF6_S364	tl.0	phosphorylation	7.34862e-20
Cold	Glyma.19G246000.1_S128_1	F20D21.28_S128	Glyma.08G037300.1_T220_1	CDKF;1_T220	tl.0	dephosphorylation	7.34862e-20
Cold	Glyma.19G246000.1_S128_1	F20D21.28_S128	Glyma.19G007300.1_S335_1	TOT3_S335	tl.0	dephosphorylation	7.34862e-20
Cold	Glyma.20G019300.1_S1280_1	GRL_S1280	Glyma.07G046800.1_S364_1	SRF6_S364	tl.0	dephosphorylation	0.333333
Cold	Glyma.20G084100.1_S138_1	YUP8H12.24_S138	Glyma.06G161200.1_S496_1	CPK4_S496	tl.0	phosphorylation	1.17578e-19
Cold	Glyma.20G084100.1_S567_1	YUP8H12.24_S567	Glyma.10G173000.1_S334_1	TOI5_S334	tl.0	phosphorylation	2.46914e-18
Cold	Glyma.20G143300.1_S142_1	RANGAP2_S142	Glyma.19G007300.1_S335_1	TOT3_S335	tl.1	dephosphorylation	3.7037e-18
Cold	Glyma.20G166200.1_S687_1	Glyma.20G166200_S687	Glyma.06G161200.1_S496_1	CPK4_S496	tl.1	dephosphorylation	1.54321e-18
Cold	Glyma.20G191700.1_S21_2	BTR1_S21	Glyma.10G173000.1_S334_1	TOI5_S334	tl.1	phosphorylation	2.05761e-18
Cold	Glyma.20G191700.1_S28_2	BTR1_S28	Glyma.10G173000.1_S334_1	TOI5_S334	tl.1	phosphorylation	2.05761e-18
Cold	Glyma.20G199100.1_S214_1	Glyma.20G199100_S214	Glyma.19G007300.1_S335_1	TOT3_S335	tl.0	dephosphorylation	5.14403e-19
Cold	Glyma.20G238400.1_S680_1	TPR3_S680	Glyma.07G046800.1_S364_1	SRF6_S364	tl.0	undetermined	7.34862e-20
Cold	Glyma.20G238400.1_S680_1	TPR3_S680	Glyma.08G037300.1_T220_1	CDKF;1_T220	tl.0	phosphorylation	7.34862e-20
Cold	Glyma.20G238400.1_S680_1	TPR3_S680	Glyma.19G007300.1_S335_1	TOT3_S335	tl.0	dephosphorylation	7.34862e-20
Cold	Glyma.U012400.1_T44_1	Glyma.U012400_T44	Glyma.06G161200.1_S496_1	CPK4_S496	tl.1	undetermined	7.34862e-20
Control	Glyma.01G036700.1_S182_1	Glyma.01G036700_S182	Glyma.07G072100.1_T24_1	BSK3_T24	tl.0	dephosphorylation	5.14403e-19
Control	Glyma.01G036700.1_S182_1	Glyma.01G036700_S182	Glyma.10G173000.1_S334_1	TOI5_S334	tl.0	dephosphorylation	5.14403e-19
Control	Glyma.01G036700.1_S182_1	Glyma.01G036700_S182	Glyma.13G161700.1_S197_1	CRCK3_S197	tl.0	dephosphorylation	5.14403e-19
Control	Glyma.01G036700.1_S182_1	Glyma.01G036700_S182	Glyma.15G074900.1_S59_1	Glyma.15G074900_S59	tl.0	dephosphorylation	5.14403e-19
Control	Glyma.01G036700.1_S182_1	Glyma.01G036700_S182	Glyma.20G070700.1_S570_1	CPK1_S570	tl.0	dephosphorylation	5.14403e-19
Control	Glyma.01G089300.1_S512_1	CHUP1_S512	Glyma.10G173000.1_S334_1	TOI5_S334	tl.0	dephosphorylation	5.14403e-19
Control	Glyma.01G089300.1_S512_1	CHUP1_S512	Glyma.13G161700.1_S197_1	CRCK3_S197	tl.0	phosphorylation	5.14403e-19
Control	Glyma.01G089300.1_S512_1	CHUP1_S512	Glyma.15G074900.1_S59_1	Glyma.15G074900_S59	tl.0	phosphorylation	5.14403e-19
Control	Glyma.01G209200.1_S1368_1	MNJ7.8_S1368	Glyma.08G037300.1_T220_1	CDKF;1_T220	tl.1	phosphorylation	6.17284e-18
Control	Glyma.01G230700.1_S12_1	F14M2.18_S12	Glyma.08G037300.1_T220_1	CDKF;1_T220	tl.1	dephosphorylation	8.81834e-20
Control	Glyma.02G000200.1_T439_1	T15P17.7_T439	Glyma.10G173000.1_S334_1	TOI5_S334	tl.0	dephosphorylation	5.14403e-19
Control	Glyma.02G000200.1_T439_1	T15P17.7_T439	Glyma.13G161700.1_S197_1	CRCK3_S197	tl.0	dephosphorylation	5.14403e-19
Control	Glyma.02G022800.1_S302_1	Glyma.02G022800_S302	Glyma.10G173000.1_S334_1	TOI5_S334	tl.1	dephosphorylation	0.333333
Control	Glyma.02G022800.1_S302_1	Glyma.02G022800_S302	Glyma.13G161700.1_S197_1	CRCK3_S197	tl.1	phosphorylation	0.333333
Control	Glyma.02G044000.1_T156_1	Glyma.02G044000_T156	Glyma.10G173000.1_S334_1	TOI5_S334	tl.0	phosphorylation	4.11523e-18
Control	Glyma.02G044000.1_T156_1	Glyma.02G044000_T156	Glyma.13G161700.1_S197_1	CRCK3_S197	tl.0	phosphorylation	4.11523e-18
Control	Glyma.02G044000.1_T156_1	Glyma.02G044000_T156	Glyma.15G074900.1_S59_1	Glyma.15G074900_S59	tl.0	undetermined	4.11523e-18
Control	Glyma.02G044000.1_T156_1	Glyma.02G044000_T156	Glyma.19G007300.1_S335_1	TOT3_S335	tl.1	dephosphorylation	4.11523e-18
Control	Glyma.02G082800.1_S99_1	VIP1_S99_1	Glyma.10G173000.1_S334_1	TOI5_S334	tl.0	dephosphorylation	5.14403e-19
Control	Glyma.02G082800.1_S99_1	VIP1_S99_1	Glyma.13G161700.1_S197_1	CRCK3_S197	tl.0	dephosphorylation	5.14403e-19
Control	Glyma.02G082800.1_S99_1	VIP1_S99_1	Glyma.15G074900.1_S59_1	Glyma.15G074900_S59	tl.0	phosphorylation	5.14403e-19
Control	Glyma.02G144400.1_S63_1	AtIDD12_S63	Glyma.10G173000.1_S334_1	TOI5_S334	tl.0	phosphorylation	5.14403e-19
Control	Glyma.02G144400.1_S63_1	AtIDD12_S63	Glyma.13G161700.1_S197_1	CRCK3_S197	tl.0	phosphorylation	5.14403e-19
Control	Glyma.02G220700.1_S235_1	ATG13_S235	Glyma.10G173000.1_S334_1	TOI5_S334	tl.1	phosphorylation	0.333333
Control	Glyma.02G228700.1_S265_1	F2KP_S265	Glyma.10G173000.1_S334_1	TOI5_S334	tl.0	undetermined	7.34862e-20
Control	Glyma.02G311300.1_S590_2	Glyma.02G311300_S590	Glyma.19G007300.1_S335_1	TOT3_S335	tl.1	phosphorylation	2.05761e-19
Control	Glyma.02G311300.1_S596_1	Glyma.02G311300_S596	Glyma.07G072100.1_T24_1	BSK3_T24	tl.1	phosphorylation	0.333333
Control	Glyma.02G311300.1_S596_1	Glyma.02G311300_S596	Glyma.10G173000.1_S334_1	TOI5_S334	tl.1	phosphorylation	0.333333
Control	Glyma.02G311300.1_S596_1	Glyma.02G311300_S596	Glyma.13G161700.1_S197_1	CRCK3_S197	tl.1	phosphorylation	0.333333
Control	Glyma.02G311300.1_S596_1	Glyma.02G311300_S596	Glyma.15G074900.1_S59_1	Glyma.15G074900_S59	tl.1	dephosphorylation	0.333333
Control	Glyma.02G311300.1_S596_1	Glyma.02G311300_S596	Glyma.20G070700.1_S570_1	CPK1_S570	tl.1	phosphorylation	0.333333
Control	Glyma.02G311300.1_S596_2	Glyma.02G311300_S596	Glyma.19G007300.1_S335_1	TOT3_S335	tl.1	phosphorylation	2.05761e-19
Control	Glyma.04G061700.1_S310_1	PDS5C_S310	Glyma.13G161700.1_S197_1	CRCK3_S197	tl.1	dephosphorylation	0.333333
Control	Glyma.04G217100.1_S146_1	Atalba1_S146	Glyma.07G072100.1_T24_1	BSK3_T24	tl.0	phosphorylation	1.46972e-19
Control	Glyma.04G217100.1_S146_1	Atalba1_S146	Glyma.10G173000.1_S334_1	TOI5_S334	tl.0	undetermined	1.46972e-19
Control	Glyma.04G217100.1_S146_1	Atalba1_S146	Glyma.13G161700.1_S197_1	CRCK3_S197	tl.0	phosphorylation	1.46972e-19
Control	Glyma.04G217100.1_S146_1	Atalba1_S146	Glyma.15G074900.1_S59_1	Glyma.15G074900_S59	tl.0	dephosphorylation	1.46972e-19
Control	Glyma.04G217100.1_S146_1	Atalba1_S146	Glyma.20G070700.1_S570_1	CPK1_S570	tl.0	phosphorylation	1.46972e-19
Control	Glyma.05G033500.1_S484_1	ALDH10A8_S484	Glyma.10G173000.1_S334_1	TOI5_S334	tl.0	dephosphorylation	7.34862e-20
Control	Glyma.05G033500.1_S484_1	ALDH10A8_S484	Glyma.13G161700.1_S197_1	CRCK3_S197	tl.0	dephosphorylation	7.34862e-20
Control	Glyma.05G054700.1_T31_1	F5O11.25_T31	Glyma.10G173000.1_S334_1	TOI5_S334	tl.0	dephosphorylation	4.11523e-18
Control	Glyma.05G054700.1_T31_1	F5O11.25_T31	Glyma.13G161700.1_S197_1	CRCK3_S197	tl.0	dephosphorylation	4.11523e-18
Control	Glyma.05G054700.1_T31_1	F5O11.25_T31	Glyma.19G007300.1_S335_1	TOT3_S335	tl.0	phosphorylation	4.11523e-18
Control	Glyma.05G054700.1_T31_1	F5O11.25_T31	Glyma.19G007300.1_S335_1	TOT3_S335	tl.1	phosphorylation	4.11523e-18
Control	Glyma.05G070300.1_S158_1	Glyma.05G070300_S158	Glyma.19G007300.1_S335_1	TOT3_S335	tl.0	phosphorylation	6.17284e-19
Control	Glyma.05G139400.1_T89_1	MIE15.3_T89	Glyma.10G173000.1_S334_1	TOI5_S334	tl.1	dephosphorylation	0.333333
Control	Glyma.05G139400.1_T89_1	MIE15.3_T89	Glyma.13G161700.1_S197_1	CRCK3_S197	tl.1	dephosphorylation	0.333333
Control	Glyma.05G243200.1_S37_1	PMI1_S37	Glyma.08G037300.1_T220_1	CDKF;1_T220	tl.0	dephosphorylation	4.11523e-19
Control	Glyma.06G008300.1_S1005_1	Glyma.06G008300_S1005	Glyma.10G173000.1_S334_1	TOI5_S334	tl.1	phosphorylation	0.333333
Control	Glyma.06G008300.1_S1005_1	Glyma.06G008300_S1005	Glyma.13G161700.1_S197_1	CRCK3_S197	tl.1	phosphorylation	0.333333
Control	Glyma.06G040600.1_S618_1	THO5_S618	Glyma.13G161700.1_S197_1	CRCK3_S197	tl.0	dephosphorylation	4.11523e-18
Control	Glyma.06G127600.1_S1132_1	MYN8.5_S1132	Glyma.10G173000.1_S334_1	TOI5_S334	tl.1	dephosphorylation	0.333333
Control	Glyma.06G127600.1_S1132_1	MYN8.5_S1132	Glyma.13G161700.1_S197_1	CRCK3_S197	tl.1	dephosphorylation	0.333333
Control	Glyma.06G127600.1_S1132_1	MYN8.5_S1132	Glyma.15G074900.1_S59_1	Glyma.15G074900_S59	tl.1	phosphorylation	0.333333
Control	Glyma.06G137000.1_S112_1	DMR6_S112	Glyma.10G173000.1_S334_1	TOI5_S334	tl.1	dephosphorylation	0.333333
Control	Glyma.06G137000.1_S112_1	DMR6_S112	Glyma.13G161700.1_S197_1	CRCK3_S197	tl.1	undetermined	0.333333
Control	Glyma.06G137000.1_S112_1	DMR6_S112	Glyma.15G074900.1_S59_1	Glyma.15G074900_S59	tl.1	dephosphorylation	0.333333
Control	Glyma.06G137000.1_S112_1	DMR6_S112	Glyma.20G070700.1_S570_1	CPK1_S570	tl.1	dephosphorylation	0.333333
Control	Glyma.06G148800.1_S146_1	Atalba1_S146	Glyma.10G173000.1_S334_1	TOI5_S334	tl.0	dephosphorylation	7.34862e-20
Control	Glyma.06G148800.1_S146_1	Atalba1_S146	Glyma.13G161700.1_S197_1	CRCK3_S197	tl.0	phosphorylation	7.34862e-20
Control	Glyma.06G148800.1_S146_1	Atalba1_S146	Glyma.15G074900.1_S59_1	Glyma.15G074900_S59	tl.0	dephosphorylation	7.34862e-20
Control	Glyma.06G216700.1_S45_1	ATNUDT19_S45	Glyma.10G173000.1_S334_1	TOI5_S334	tl.1	phosphorylation	0.333333
Control	Glyma.06G216700.1_S45_1	ATNUDT19_S45	Glyma.13G161700.1_S197_1	CRCK3_S197	tl.1	phosphorylation	0.333333
Control	Glyma.06G300800.1_S208_1	MASP1_S208	Glyma.13G161700.1_S197_1	CRCK3_S197	tl.1	dephosphorylation	0.333333
Control	Glyma.06G300800.1_S208_1	MASP1_S208	Glyma.15G074900.1_S59_1	Glyma.15G074900_S59	tl.1	undetermined	0.333333
Control	Glyma.07G042700.1_S15_1	T10D10.12_S15	Glyma.10G173000.1_S334_1	TOI5_S334	tl.0	dephosphorylation	1.46972e-19
Control	Glyma.07G042700.1_S15_1	T10D10.12_S15	Glyma.13G161700.1_S197_1	CRCK3_S197	tl.0	dephosphorylation	1.46972e-19
Control	Glyma.07G042700.1_S15_1	T10D10.12_S15	Glyma.15G074900.1_S59_1	Glyma.15G074900_S59	tl.0	undetermined	1.46972e-19
Control	Glyma.07G046500.1_S24_1	F20D23.3_S24	Glyma.08G037300.1_T220_1	CDKF;1_T220	tl.1	dephosphorylation	2.93945e-19
Control	Glyma.07G070900.1_S180_2	BUD13_S180	Glyma.10G173000.1_S334_1	TOI5_S334	tl.0	undetermined	5.14403e-19
Control	Glyma.07G070900.1_S180_2	BUD13_S180	Glyma.13G161700.1_S197_1	CRCK3_S197	tl.0	undetermined	5.14403e-19
Control	Glyma.07G072100.1_T24_1	BSK3_T24	Glyma.10G173000.1_S334_1	TOI5_S334	tl.1	phosphorylation	0.333333
Control	Glyma.07G072100.1_T24_1	BSK3_T24	Glyma.13G161700.1_S197_1	CRCK3_S197	tl.1	phosphorylation	0.333333
Control	Glyma.07G072100.1_T24_1	BSK3_T24	Glyma.20G070700.1_S570_1	CPK1_S570	tl.1	phosphorylation	0.333333
Control	Glyma.07G078300.1_S207_1	ATRSP41_S207	Glyma.08G037300.1_T220_1	CDKF;1_T220	tl.0	dephosphorylation	2.05761e-19
Control	Glyma.07G180000.1_S80_1	F19G14.14_S80	Glyma.10G173000.1_S334_1	TOI5_S334	tl.0	phosphorylation	5.14403e-19
Control	Glyma.07G180000.1_S80_1	F19G14.14_S80	Glyma.13G161700.1_S197_1	CRCK3_S197	tl.0	phosphorylation	5.14403e-19
Control	Glyma.07G202100.1_S976_1	Glyma.07G202100_S976	Glyma.07G072100.1_T24_1	BSK3_T24	tl.0	phosphorylation	4.11523e-18
Control	Glyma.07G202100.1_S976_1	Glyma.07G202100_S976	Glyma.10G173000.1_S334_1	TOI5_S334	tl.0	undetermined	4.11523e-18
Control	Glyma.07G202100.1_S976_1	Glyma.07G202100_S976	Glyma.13G161700.1_S197_1	CRCK3_S197	tl.0	phosphorylation	4.11523e-18
Control	Glyma.07G202100.1_S976_1	Glyma.07G202100_S976	Glyma.15G074900.1_S59_1	Glyma.15G074900_S59	tl.0	dephosphorylation	4.11523e-18
Control	Glyma.07G202100.1_S976_1	Glyma.07G202100_S976	Glyma.20G070700.1_S570_1	CPK1_S570	tl.0	phosphorylation	4.11523e-18
Control	Glyma.07G224200.1_S184_2	DRT111_S184	Glyma.07G072100.1_T24_1	BSK3_T24	tl.0	phosphorylation	1.46972e-19
Control	Glyma.07G224200.1_S184_2	DRT111_S184	Glyma.10G173000.1_S334_1	TOI5_S334	tl.0	phosphorylation	1.46972e-19
Control	Glyma.07G224200.1_S184_2	DRT111_S184	Glyma.13G161700.1_S197_1	CRCK3_S197	tl.0	phosphorylation	1.46972e-19
Control	Glyma.07G224200.1_S184_2	DRT111_S184	Glyma.15G074900.1_S59_1	Glyma.15G074900_S59	tl.0	dephosphorylation	1.46972e-19
Control	Glyma.07G224200.1_S184_2	DRT111_S184	Glyma.20G070700.1_S570_1	CPK1_S570	tl.0	phosphorylation	1.46972e-19
Control	Glyma.07G224200.1_S186_2	DRT111_S186	Glyma.07G072100.1_T24_1	BSK3_T24	tl.0	phosphorylation	1.46972e-19
Control	Glyma.07G224200.1_S186_2	DRT111_S186	Glyma.10G173000.1_S334_1	TOI5_S334	tl.0	phosphorylation	1.46972e-19
Control	Glyma.07G224200.1_S186_2	DRT111_S186	Glyma.13G161700.1_S197_1	CRCK3_S197	tl.0	phosphorylation	1.46972e-19
Control	Glyma.07G224200.1_S186_2	DRT111_S186	Glyma.15G074900.1_S59_1	Glyma.15G074900_S59	tl.0	dephosphorylation	1.46972e-19
Control	Glyma.07G224200.1_S186_2	DRT111_S186	Glyma.20G070700.1_S570_1	CPK1_S570	tl.0	phosphorylation	1.46972e-19
Control	Glyma.08G026700.1_S1075_1	Glyma.08G026700_S1075	Glyma.07G072100.1_T24_1	BSK3_T24	tl.0	phosphorylation	1.46972e-19
Control	Glyma.08G026700.1_S1075_1	Glyma.08G026700_S1075	Glyma.10G173000.1_S334_1	TOI5_S334	tl.0	phosphorylation	1.46972e-19
Control	Glyma.08G026700.1_S1075_1	Glyma.08G026700_S1075	Glyma.13G161700.1_S197_1	CRCK3_S197	tl.0	phosphorylation	1.46972e-19
Control	Glyma.08G026700.1_S1075_1	Glyma.08G026700_S1075	Glyma.15G074900.1_S59_1	Glyma.15G074900_S59	tl.0	dephosphorylation	1.46972e-19
Control	Glyma.08G026700.1_S1075_1	Glyma.08G026700_S1075	Glyma.20G070700.1_S570_1	CPK1_S570	tl.0	phosphorylation	1.46972e-19
Control	Glyma.08G037300.1_T220_1	CDKF;1_T220	Glyma.10G173000.1_S334_1	TOI5_S334	tl.1	dephosphorylation	1.02881e-19
Control	Glyma.08G037300.1_T220_1	CDKF;1_T220	Glyma.13G161700.1_S197_1	CRCK3_S197	tl.1	dephosphorylation	1.02881e-19
Control	Glyma.08G122700.1_S311_1	Glyma.08G122700_S311	Glyma.10G173000.1_S334_1	TOI5_S334	tl.1	phosphorylation	0.333333
Control	Glyma.08G122700.1_S311_1	Glyma.08G122700_S311	Glyma.13G161700.1_S197_1	CRCK3_S197	tl.1	phosphorylation	0.333333
Control	Glyma.08G122700.1_S311_1	Glyma.08G122700_S311	Glyma.20G070700.1_S570_1	CPK1_S570	tl.1	phosphorylation	0.333333
Control	Glyma.08G171800.1_S84_1	PAT1_S84	Glyma.10G173000.1_S334_1	TOI5_S334	tl.1	phosphorylation	0.333333
Control	Glyma.09G018600.1_S13_1	ATFRO6_S13	Glyma.10G173000.1_S334_1	TOI5_S334	tl.0	phosphorylation	4.11523e-18
Control	Glyma.09G278600.1_S331_1	T19C21.10_S331	Glyma.10G173000.1_S334_1	TOI5_S334	tl.1	dephosphorylation	0.333333
Control	Glyma.09G278600.1_S331_1	T19C21.10_S331	Glyma.13G161700.1_S197_1	CRCK3_S197	tl.1	dephosphorylation	0.333333
Control	Glyma.10G082400.1_S8_1	SYP121_S8	Glyma.19G007300.1_S335_1	TOT3_S335	tl.0	phosphorylation	6.17284e-19
Control	Glyma.10G132800.1_S138_1	YUP8H12.24_S138	Glyma.07G072100.1_T24_1	BSK3_T24	tl.1	phosphorylation	0.333333
Control	Glyma.10G132800.1_S138_1	YUP8H12.24_S138	Glyma.10G173000.1_S334_1	TOI5_S334	tl.1	dephosphorylation	0.333333
Control	Glyma.10G132800.1_S138_1	YUP8H12.24_S138	Glyma.13G161700.1_S197_1	CRCK3_S197	tl.1	phosphorylation	0.333333
Control	Glyma.10G132800.1_S138_1	YUP8H12.24_S138	Glyma.15G074900.1_S59_1	Glyma.15G074900_S59	tl.1	phosphorylation	0.333333
Control	Glyma.10G132800.1_S138_1	YUP8H12.24_S138	Glyma.20G070700.1_S570_1	CPK1_S570	tl.1	phosphorylation	0.333333
Control	Glyma.10G173000.1_S334_1	TOI5_S334	Glyma.07G072100.1_T24_1	BSK3_T24	tl.1	phosphorylation	0.333333
Control	Glyma.10G173000.1_S334_1	TOI5_S334	Glyma.13G161700.1_S197_1	CRCK3_S197	tl.1	phosphorylation	0.333333
Control	Glyma.10G173000.1_S334_1	TOI5_S334	Glyma.15G074900.1_S59_1	Glyma.15G074900_S59	tl.1	phosphorylation	0.333333
Control	Glyma.10G173000.1_S334_1	TOI5_S334	Glyma.20G070700.1_S570_1	CPK1_S570	tl.1	phosphorylation	0.333333
Control	Glyma.10G202800.1_S252_1	Glyma.10G202800_S252	Glyma.10G173000.1_S334_1	TOI5_S334	tl.1	dephosphorylation	0.333333
Control	Glyma.10G202800.1_S252_1	Glyma.10G202800_S252	Glyma.13G161700.1_S197_1	CRCK3_S197	tl.1	undetermined	0.333333
Control	Glyma.10G209000.1_S60_1	APUM4_S60	Glyma.19G007300.1_S335_1	TOT3_S335	tl.0	phosphorylation	6.17284e-19
Control	Glyma.10G225800.1_S677_1	Glyma.10G225800_S677	Glyma.07G072100.1_T24_1	BSK3_T24	tl.0	undetermined	7.34862e-20
Control	Glyma.10G225800.1_S677_1	Glyma.10G225800_S677	Glyma.10G173000.1_S334_1	TOI5_S334	tl.0	undetermined	7.34862e-20
Control	Glyma.10G225800.1_S677_1	Glyma.10G225800_S677	Glyma.13G161700.1_S197_1	CRCK3_S197	tl.0	undetermined	7.34862e-20
Control	Glyma.10G225800.1_S677_1	Glyma.10G225800_S677	Glyma.15G074900.1_S59_1	Glyma.15G074900_S59	tl.0	dephosphorylation	7.34862e-20
Control	Glyma.10G225800.1_S677_1	Glyma.10G225800_S677	Glyma.20G070700.1_S570_1	CPK1_S570	tl.0	undetermined	7.34862e-20
Control	Glyma.10G239100.1_S217_2	ATRSP35_S217	Glyma.07G072100.1_T24_1	BSK3_T24	tl.0	phosphorylation	7.34862e-20
Control	Glyma.10G239100.1_S217_2	ATRSP35_S217	Glyma.10G173000.1_S334_1	TOI5_S334	tl.0	phosphorylation	7.34862e-20
Control	Glyma.10G239100.1_S217_2	ATRSP35_S217	Glyma.13G161700.1_S197_1	CRCK3_S197	tl.0	phosphorylation	7.34862e-20
Control	Glyma.10G239100.1_S217_2	ATRSP35_S217	Glyma.15G074900.1_S59_1	Glyma.15G074900_S59	tl.0	dephosphorylation	7.34862e-20
Control	Glyma.10G239100.1_S217_2	ATRSP35_S217	Glyma.20G070700.1_S570_1	CPK1_S570	tl.0	phosphorylation	7.34862e-20
Control	Glyma.11G020100.1_S249_1	T8H10.90_S249	Glyma.10G173000.1_S334_1	TOI5_S334	tl.1	phosphorylation	0.333333
Control	Glyma.11G020100.1_S249_1	T8H10.90_S249	Glyma.13G161700.1_S197_1	CRCK3_S197	tl.1	phosphorylation	0.333333
Control	Glyma.11G020100.1_S249_1	T8H10.90_S249	Glyma.15G074900.1_S59_1	Glyma.15G074900_S59	tl.1	undetermined	0.333333
Control	Glyma.11G076700.1_S206_1	GAS41_S206	Glyma.08G037300.1_T220_1	CDKF;1_T220	tl.1	dephosphorylation	8.81834e-20
Control	Glyma.11G101600.1_S319_1	Glyma.11G101600_S319	Glyma.10G173000.1_S334_1	TOI5_S334	tl.0	phosphorylation	1.46972e-19
Control	Glyma.11G101600.1_S319_1	Glyma.11G101600_S319	Glyma.13G161700.1_S197_1	CRCK3_S197	tl.0	phosphorylation	1.46972e-19
Control	Glyma.11G105500.1_S120_1	ATTOC132_S120	Glyma.19G007300.1_S335_1	TOT3_S335	tl.1	dephosphorylation	2.05761e-19
Control	Glyma.12G036400.1_S92_1	bZIP29_S92	Glyma.07G072100.1_T24_1	BSK3_T24	tl.1	phosphorylation	0.333333
Control	Glyma.12G036400.1_S92_1	bZIP29_S92	Glyma.10G173000.1_S334_1	TOI5_S334	tl.1	dephosphorylation	0.333333
Control	Glyma.12G036400.1_S92_1	bZIP29_S92	Glyma.13G161700.1_S197_1	CRCK3_S197	tl.1	phosphorylation	0.333333
Control	Glyma.12G036400.1_S92_1	bZIP29_S92	Glyma.20G070700.1_S570_1	CPK1_S570	tl.1	phosphorylation	0.333333
Control	Glyma.12G059700.1_S653_1	F16P2.41_S653	Glyma.07G072100.1_T24_1	BSK3_T24	tl.0	undetermined	4.11523e-18
Control	Glyma.12G059700.1_S653_1	F16P2.41_S653	Glyma.10G173000.1_S334_1	TOI5_S334	tl.0	undetermined	4.11523e-18
Control	Glyma.12G059700.1_S653_1	F16P2.41_S653	Glyma.13G161700.1_S197_1	CRCK3_S197	tl.0	phosphorylation	4.11523e-18
Control	Glyma.12G059700.1_S653_1	F16P2.41_S653	Glyma.15G074900.1_S59_1	Glyma.15G074900_S59	tl.0	dephosphorylation	4.11523e-18
Control	Glyma.12G059700.1_S653_1	F16P2.41_S653	Glyma.19G007300.1_S335_1	TOT3_S335	tl.0	dephosphorylation	4.11523e-18
Control	Glyma.12G059700.1_S653_1	F16P2.41_S653	Glyma.19G007300.1_S335_1	TOT3_S335	tl.1	dephosphorylation	4.11523e-18
Control	Glyma.12G059700.1_S653_1	F16P2.41_S653	Glyma.20G070700.1_S570_1	CPK1_S570	tl.0	undetermined	4.11523e-18
Control	Glyma.12G064100.1_S408_1	ALB3_S408	Glyma.07G072100.1_T24_1	BSK3_T24	tl.0	dephosphorylation	4.11523e-18
Control	Glyma.12G064100.1_S408_1	ALB3_S408	Glyma.10G173000.1_S334_1	TOI5_S334	tl.0	dephosphorylation	4.11523e-18
Control	Glyma.12G064100.1_S408_1	ALB3_S408	Glyma.13G161700.1_S197_1	CRCK3_S197	tl.0	dephosphorylation	4.11523e-18
Control	Glyma.12G064100.1_S408_1	ALB3_S408	Glyma.15G074900.1_S59_1	Glyma.15G074900_S59	tl.0	phosphorylation	4.11523e-18
Control	Glyma.12G064100.1_S408_1	ALB3_S408	Glyma.20G070700.1_S570_1	CPK1_S570	tl.0	dephosphorylation	4.11523e-18
Control	Glyma.12G103900.1_S106_1	MASP1_S106	Glyma.10G173000.1_S334_1	TOI5_S334	tl.1	dephosphorylation	0.333333
Control	Glyma.12G103900.1_S106_1	MASP1_S106	Glyma.13G161700.1_S197_1	CRCK3_S197	tl.1	dephosphorylation	0.333333
Control	Glyma.12G103900.1_S106_1	MASP1_S106	Glyma.15G074900.1_S59_1	Glyma.15G074900_S59	tl.1	dephosphorylation	0.333333
Control	Glyma.12G129800.1_S5_1	ATTPS7_S5	Glyma.07G072100.1_T24_1	BSK3_T24	tl.0	dephosphorylation	5.14403e-19
Control	Glyma.12G129800.1_S5_1	ATTPS7_S5	Glyma.10G173000.1_S334_1	TOI5_S334	tl.0	phosphorylation	5.14403e-19
Control	Glyma.12G129800.1_S5_1	ATTPS7_S5	Glyma.13G161700.1_S197_1	CRCK3_S197	tl.0	dephosphorylation	5.14403e-19
Control	Glyma.12G129800.1_S5_1	ATTPS7_S5	Glyma.15G074900.1_S59_1	Glyma.15G074900_S59	tl.0	phosphorylation	5.14403e-19
Control	Glyma.12G129800.1_S5_1	ATTPS7_S5	Glyma.20G070700.1_S570_1	CPK1_S570	tl.0	dephosphorylation	5.14403e-19
Control	Glyma.12G161300.1_S11_1	ATPPC3_S11	Glyma.10G173000.1_S334_1	TOI5_S334	tl.1	undetermined	0.333333
Control	Glyma.12G161300.1_S11_1	ATPPC3_S11	Glyma.13G161700.1_S197_1	CRCK3_S197	tl.1	dephosphorylation	0.333333
Control	Glyma.12G161300.1_S11_1	ATPPC3_S11	Glyma.20G070700.1_S570_1	CPK1_S570	tl.1	undetermined	0.333333
Control	Glyma.12G171700.1_S57_1	AtIDD2_S57	Glyma.08G037300.1_T220_1	CDKF;1_T220	tl.0	phosphorylation	2.05761e-19
Control	Glyma.12G181400.1_T110_1	HD2C_T110	Glyma.10G173000.1_S334_1	TOI5_S334	tl.0	dephosphorylation	5.14403e-19
Control	Glyma.12G181400.1_T110_1	HD2C_T110	Glyma.13G161700.1_S197_1	CRCK3_S197	tl.0	dephosphorylation	5.14403e-19
Control	Glyma.12G194000.1_S34_1	MIL23.25_S34	Glyma.07G072100.1_T24_1	BSK3_T24	tl.0	dephosphorylation	4.11523e-18
Control	Glyma.12G194000.1_S34_1	MIL23.25_S34	Glyma.10G173000.1_S334_1	TOI5_S334	tl.0	dephosphorylation	4.11523e-18
Control	Glyma.12G194000.1_S34_1	MIL23.25_S34	Glyma.13G161700.1_S197_1	CRCK3_S197	tl.0	dephosphorylation	4.11523e-18
Control	Glyma.12G194000.1_S34_1	MIL23.25_S34	Glyma.15G074900.1_S59_1	Glyma.15G074900_S59	tl.0	phosphorylation	4.11523e-18
Control	Glyma.12G194000.1_S34_1	MIL23.25_S34	Glyma.20G070700.1_S570_1	CPK1_S570	tl.0	dephosphorylation	4.11523e-18
Control	Glyma.12G237000.1_S153_2	ELI1_S153	Glyma.10G173000.1_S334_1	TOI5_S334	tl.0	dephosphorylation	5.14403e-19
Control	Glyma.12G237000.1_S153_2	ELI1_S153	Glyma.13G161700.1_S197_1	CRCK3_S197	tl.0	dephosphorylation	5.14403e-19
Control	Glyma.12G237000.1_S153_2	ELI1_S153	Glyma.15G074900.1_S59_1	Glyma.15G074900_S59	tl.0	phosphorylation	5.14403e-19
Control	Glyma.12G237000.1_S160_2	ELI1_S160	Glyma.10G173000.1_S334_1	TOI5_S334	tl.0	dephosphorylation	5.14403e-19
Control	Glyma.12G237000.1_S160_2	ELI1_S160	Glyma.13G161700.1_S197_1	CRCK3_S197	tl.0	dephosphorylation	5.14403e-19
Control	Glyma.12G237000.1_S160_2	ELI1_S160	Glyma.15G074900.1_S59_1	Glyma.15G074900_S59	tl.0	phosphorylation	5.14403e-19
Control	Glyma.13G027300.1_S171_1	T9I1.1_S171	Glyma.10G173000.1_S334_1	TOI5_S334	tl.0	phosphorylation	4.11523e-18
Control	Glyma.13G027300.1_S171_1	T9I1.1_S171	Glyma.13G161700.1_S197_1	CRCK3_S197	tl.0	undetermined	4.11523e-18
Control	Glyma.13G027300.1_S171_1	T9I1.1_S171	Glyma.19G007300.1_S335_1	TOT3_S335	tl.0	phosphorylation	4.11523e-18
Control	Glyma.13G027300.1_S171_1	T9I1.1_S171	Glyma.19G007300.1_S335_1	TOT3_S335	tl.1	phosphorylation	4.11523e-18
Control	Glyma.13G145100.1_S643_1	EIN2_S643	Glyma.10G173000.1_S334_1	TOI5_S334	tl.0	phosphorylation	5.87889e-20
Control	Glyma.13G145100.1_S643_1	EIN2_S643	Glyma.13G161700.1_S197_1	CRCK3_S197	tl.0	undetermined	5.87889e-20
Control	Glyma.13G161700.1_S197_1	CRCK3_S197	Glyma.07G072100.1_T24_1	BSK3_T24	tl.1	phosphorylation	0.333333
Control	Glyma.13G161700.1_S197_1	CRCK3_S197	Glyma.10G173000.1_S334_1	TOI5_S334	tl.1	phosphorylation	0.333333
Control	Glyma.13G161700.1_S197_1	CRCK3_S197	Glyma.15G074900.1_S59_1	Glyma.15G074900_S59	tl.1	dephosphorylation	0.333333
Control	Glyma.13G161700.1_S197_1	CRCK3_S197	Glyma.20G070700.1_S570_1	CPK1_S570	tl.1	phosphorylation	0.333333
Control	Glyma.13G175200.1_S122_1	HB-1_S122	Glyma.10G173000.1_S334_1	TOI5_S334	tl.0	phosphorylation	1.46972e-19
Control	Glyma.13G175200.1_S122_1	HB-1_S122	Glyma.13G161700.1_S197_1	CRCK3_S197	tl.0	phosphorylation	1.46972e-19
Control	Glyma.13G181200.1_S16_1	SFR6_S16	Glyma.10G173000.1_S334_1	TOI5_S334	tl.1	phosphorylation	0.333333
Control	Glyma.13G181200.1_S16_1	SFR6_S16	Glyma.13G161700.1_S197_1	CRCK3_S197	tl.1	dephosphorylation	0.333333
Control	Glyma.13G181200.1_S16_1	SFR6_S16	Glyma.15G074900.1_S59_1	Glyma.15G074900_S59	tl.1	phosphorylation	0.333333
Control	Glyma.13G221300.1_S457_1	PTAC12_S457	Glyma.10G173000.1_S334_1	TOI5_S334	tl.0	phosphorylation	4.11523e-18
Control	Glyma.13G221300.1_S457_1	PTAC12_S457	Glyma.13G161700.1_S197_1	CRCK3_S197	tl.0	phosphorylation	4.11523e-18
Control	Glyma.13G221300.1_S457_1	PTAC12_S457	Glyma.15G074900.1_S59_1	Glyma.15G074900_S59	tl.0	dephosphorylation	4.11523e-18
Control	Glyma.13G242800.1_S802_1	Glyma.13G242800_S802	Glyma.10G173000.1_S334_1	TOI5_S334	tl.0	phosphorylation	4.11523e-18
Control	Glyma.13G242800.1_S802_1	Glyma.13G242800_S802	Glyma.13G161700.1_S197_1	CRCK3_S197	tl.0	phosphorylation	4.11523e-18
Control	Glyma.13G242800.1_S802_1	Glyma.13G242800_S802	Glyma.19G007300.1_S335_1	TOT3_S335	tl.1	dephosphorylation	4.11523e-18
Control	Glyma.13G280700.1_S477_1	CLUB_S477	Glyma.19G007300.1_S335_1	TOT3_S335	tl.0	dephosphorylation	6.17284e-19
Control	Glyma.13G302200.1_S363_1	Glyma.13G302200_S363	Glyma.07G072100.1_T24_1	BSK3_T24	tl.0	phosphorylation	4.11523e-18
Control	Glyma.13G302200.1_S363_1	Glyma.13G302200_S363	Glyma.10G173000.1_S334_1	TOI5_S334	tl.0	phosphorylation	4.11523e-18
Control	Glyma.13G302200.1_S363_1	Glyma.13G302200_S363	Glyma.13G161700.1_S197_1	CRCK3_S197	tl.0	phosphorylation	4.11523e-18
Control	Glyma.13G302200.1_S363_1	Glyma.13G302200_S363	Glyma.15G074900.1_S59_1	Glyma.15G074900_S59	tl.0	undetermined	4.11523e-18
Control	Glyma.13G302200.1_S363_1	Glyma.13G302200_S363	Glyma.19G007300.1_S335_1	TOT3_S335	tl.0	phosphorylation	4.11523e-18
Control	Glyma.13G302200.1_S363_1	Glyma.13G302200_S363	Glyma.19G007300.1_S335_1	TOT3_S335	tl.1	dephosphorylation	4.11523e-18
Control	Glyma.13G302200.1_S363_1	Glyma.13G302200_S363	Glyma.20G070700.1_S570_1	CPK1_S570	tl.0	phosphorylation	4.11523e-18
Control	Glyma.13G347700.1_S211_1	LOX1_S211	Glyma.07G072100.1_T24_1	BSK3_T24	tl.1	undetermined	0.333333
Control	Glyma.13G347700.1_S211_1	LOX1_S211	Glyma.10G173000.1_S334_1	TOI5_S334	tl.1	phosphorylation	0.333333
Control	Glyma.13G347700.1_S211_1	LOX1_S211	Glyma.13G161700.1_S197_1	CRCK3_S197	tl.1	dephosphorylation	0.333333
Control	Glyma.13G347700.1_S211_1	LOX1_S211	Glyma.15G074900.1_S59_1	Glyma.15G074900_S59	tl.1	phosphorylation	0.333333
Control	Glyma.13G347700.1_S211_1	LOX1_S211	Glyma.20G070700.1_S570_1	CPK1_S570	tl.1	phosphorylation	0.333333
Control	Glyma.13G372100.1_S39_1	CAX2_S39	Glyma.10G173000.1_S334_1	TOI5_S334	tl.0	dephosphorylation	4.11523e-18
Control	Glyma.14G001200.1_S809_2	AtEH2_S809	Glyma.10G173000.1_S334_1	TOI5_S334	tl.0	dephosphorylation	4.11523e-18
Control	Glyma.14G001200.1_S809_2	AtEH2_S809	Glyma.13G161700.1_S197_1	CRCK3_S197	tl.0	dephosphorylation	4.11523e-18
Control	Glyma.14G001200.1_S813_2	AtEH2_S813	Glyma.10G173000.1_S334_1	TOI5_S334	tl.0	dephosphorylation	4.11523e-18
Control	Glyma.14G029100.1_S123_1	ATSPS3F_S123	Glyma.19G007300.1_S335_1	TOT3_S335	tl.0	dephosphorylation	4.11523e-19
Control	Glyma.14G029100.1_S153_1	ATSPS3F_S153	Glyma.08G037300.1_T220_1	CDKF;1_T220	tl.1	phosphorylation	8.81834e-20
Control	Glyma.14G095300.1_S76_1	T19L18.8_S76	Glyma.10G173000.1_S334_1	TOI5_S334	tl.1	phosphorylation	0.333333
Control	Glyma.14G095300.1_S76_1	T19L18.8_S76	Glyma.13G161700.1_S197_1	CRCK3_S197	tl.1	phosphorylation	0.333333
Control	Glyma.14G095300.1_S76_1	T19L18.8_S76	Glyma.15G074900.1_S59_1	Glyma.15G074900_S59	tl.1	phosphorylation	0.333333
Control	Glyma.15G023600.1_S245_1	T7N22.12_S245	Glyma.10G173000.1_S334_1	TOI5_S334	tl.1	undetermined	4.11523e-19
Control	Glyma.15G074900.1_S59_1	Glyma.15G074900_S59	Glyma.10G173000.1_S334_1	TOI5_S334	tl.1	phosphorylation	0.333333
Control	Glyma.15G074900.1_S59_1	Glyma.15G074900_S59	Glyma.13G161700.1_S197_1	CRCK3_S197	tl.1	dephosphorylation	0.333333
Control	Glyma.15G100200.1_S150_1	NAIP1_S150	Glyma.08G037300.1_T220_1	CDKF;1_T220	tl.1	phosphorylation	0.111111
Control	Glyma.15G120300.1_S1647_1	PDS5_S1647	Glyma.10G173000.1_S334_1	TOI5_S334	tl.1	dephosphorylation	0.333333
Control	Glyma.15G120300.1_S1647_1	PDS5_S1647	Glyma.13G161700.1_S197_1	CRCK3_S197	tl.1	dephosphorylation	0.333333
Control	Glyma.15G143800.1_S45_1	Glyma.15G143800_S45	Glyma.08G037300.1_T220_1	CDKF;1_T220	tl.0	undetermined	2.05761e-19
Control	Glyma.15G253700.1_T95_1	PSBR_T95	Glyma.10G173000.1_S334_1	TOI5_S334	tl.1	dephosphorylation	0.333333
Control	Glyma.15G253700.1_T95_1	PSBR_T95	Glyma.13G161700.1_S197_1	CRCK3_S197	tl.1	dephosphorylation	0.333333
Control	Glyma.15G255400.1_S98_1	SR45_S98	Glyma.08G037300.1_T220_1	CDKF;1_T220	tl.0	phosphorylation	6.17284e-18
Control	Glyma.16G003900.1_S318_1	ENOR3L4_S318	Glyma.19G007300.1_S335_1	TOT3_S335	tl.0	phosphorylation	6.17284e-19
Control	Glyma.16G011100.1_S15_1	T10D10.12_S15	Glyma.19G007300.1_S335_1	TOT3_S335	tl.1	phosphorylation	2.05761e-19
Control	Glyma.16G070900.1_S3_1	HLP1_S3	Glyma.07G072100.1_T24_1	BSK3_T24	tl.1	dephosphorylation	0.333333
Control	Glyma.16G070900.1_S3_1	HLP1_S3	Glyma.10G173000.1_S334_1	TOI5_S334	tl.1	undetermined	0.333333
Control	Glyma.16G070900.1_S3_1	HLP1_S3	Glyma.13G161700.1_S197_1	CRCK3_S197	tl.1	dephosphorylation	0.333333
Control	Glyma.16G070900.1_S3_1	HLP1_S3	Glyma.15G074900.1_S59_1	Glyma.15G074900_S59	tl.1	phosphorylation	0.333333
Control	Glyma.16G070900.1_S3_1	HLP1_S3	Glyma.20G070700.1_S570_1	CPK1_S570	tl.1	dephosphorylation	0.333333
Control	Glyma.16G113000.1_S109_1	HMG1_S109	Glyma.10G173000.1_S334_1	TOI5_S334	tl.0	dephosphorylation	4.11523e-18
Control	Glyma.16G113000.1_S109_1	HMG1_S109	Glyma.13G161700.1_S197_1	CRCK3_S197	tl.0	dephosphorylation	4.11523e-18
Control	Glyma.16G113000.1_S109_1	HMG1_S109	Glyma.15G074900.1_S59_1	Glyma.15G074900_S59	tl.0	undetermined	4.11523e-18
Control	Glyma.16G113000.1_S109_1	HMG1_S109	Glyma.19G007300.1_S335_1	TOT3_S335	tl.0	dephosphorylation	4.11523e-18
Control	Glyma.16G165800.1_T41_1	LHB1B1_T41	Glyma.19G007300.1_S335_1	TOT3_S335	tl.0	phosphorylation	6.17284e-19
Control	Glyma.16G220500.1_S14_1	ATH9_S14	Glyma.10G173000.1_S334_1	TOI5_S334	tl.0	dephosphorylation	4.11523e-18
Control	Glyma.16G220500.1_S14_1	ATH9_S14	Glyma.13G161700.1_S197_1	CRCK3_S197	tl.0	dephosphorylation	4.11523e-18
Control	Glyma.16G220500.1_S14_1	ATH9_S14	Glyma.15G074900.1_S59_1	Glyma.15G074900_S59	tl.0	undetermined	4.11523e-18
Control	Glyma.16G220500.1_S14_1	ATH9_S14	Glyma.19G007300.1_S335_1	TOT3_S335	tl.1	phosphorylation	4.11523e-18
Control	Glyma.17G092400.1_S15_1	SPDS1_S15	Glyma.10G173000.1_S334_1	TOI5_S334	tl.1	dephosphorylation	0.333333
Control	Glyma.17G092400.1_S15_1	SPDS1_S15	Glyma.13G161700.1_S197_1	CRCK3_S197	tl.1	phosphorylation	0.333333
Control	Glyma.17G096100.1_S5_1	AHA11_S5	Glyma.08G037300.1_T220_1	CDKF;1_T220	tl.0	phosphorylation	2.05761e-19
Control	Glyma.17G129700.1_S214_1	ATEXO70F1_S214	Glyma.10G173000.1_S334_1	TOI5_S334	tl.0	dephosphorylation	1.46972e-19
Control	Glyma.17G140600.1_S32_1	DL4665W_S32	Glyma.08G037300.1_T220_1	CDKF;1_T220	tl.0	dephosphorylation	6.17284e-18
Control	Glyma.17G199200.1_T883_1	AHA5_T883	Glyma.19G007300.1_S335_1	TOT3_S335	tl.0	dephosphorylation	4.11523e-19
Control	Glyma.17G249900.1_S36_1	EXA1_S36	Glyma.10G173000.1_S334_1	TOI5_S334	tl.1	phosphorylation	0.333333
Control	Glyma.17G256900.1_S982_1	TCS1_S982	Glyma.19G007300.1_S335_1	TOT3_S335	tl.0	phosphorylation	4.11523e-19
Control	Glyma.18G019700.1_S343_1	Glyma.18G019700_S343	Glyma.10G173000.1_S334_1	TOI5_S334	tl.1	phosphorylation	0.333333
Control	Glyma.18G019700.1_S343_1	Glyma.18G019700_S343	Glyma.13G161700.1_S197_1	CRCK3_S197	tl.1	dephosphorylation	0.333333
Control	Glyma.18G137100.1_S9_1	SPDS1_S9	Glyma.10G173000.1_S334_1	TOI5_S334	tl.1	dephosphorylation	0.333333
Control	Glyma.18G137100.1_S9_1	SPDS1_S9	Glyma.13G161700.1_S197_1	CRCK3_S197	tl.1	dephosphorylation	0.333333
Control	Glyma.18G137100.1_S9_1	SPDS1_S9	Glyma.15G074900.1_S59_1	Glyma.15G074900_S59	tl.1	dephosphorylation	0.333333
Control	Glyma.18G146600.1_S737_1	KCA1_S737	Glyma.10G173000.1_S334_1	TOI5_S334	tl.1	undetermined	0.333333
Control	Glyma.18G146600.1_S737_1	KCA1_S737	Glyma.13G161700.1_S197_1	CRCK3_S197	tl.1	phosphorylation	0.333333
Control	Glyma.18G207900.1_S11_1	PATL6_S11	Glyma.10G173000.1_S334_1	TOI5_S334	tl.0	dephosphorylation	7.34862e-20
Control	Glyma.18G207900.1_S11_1	PATL6_S11	Glyma.13G161700.1_S197_1	CRCK3_S197	tl.0	phosphorylation	7.34862e-20
Control	Glyma.18G207900.1_S11_1	PATL6_S11	Glyma.15G074900.1_S59_1	Glyma.15G074900_S59	tl.0	phosphorylation	7.34862e-20
Control	Glyma.18G210100.1_S331_1	T19C21.10_S331	Glyma.10G173000.1_S334_1	TOI5_S334	tl.1	dephosphorylation	0.333333
Control	Glyma.18G210100.1_S331_1	T19C21.10_S331	Glyma.13G161700.1_S197_1	CRCK3_S197	tl.1	dephosphorylation	0.333333
Control	Glyma.18G217500.1_S10_1	T6A23.19_S10	Glyma.10G173000.1_S334_1	TOI5_S334	tl.1	undetermined	0.333333
Control	Glyma.18G217500.1_S10_1	T6A23.19_S10	Glyma.13G161700.1_S197_1	CRCK3_S197	tl.1	dephosphorylation	0.333333
Control	Glyma.18G217500.1_S10_1	T6A23.19_S10	Glyma.15G074900.1_S59_1	Glyma.15G074900_S59	tl.1	undetermined	0.333333
Control	Glyma.18G217500.1_S10_1	T6A23.19_S10	Glyma.20G070700.1_S570_1	CPK1_S570	tl.1	dephosphorylation	0.333333
Control	Glyma.18G280500.1_S850_1	LINC1_S850	Glyma.19G007300.1_S335_1	TOT3_S335	tl.1	phosphorylation	2.05761e-18
Control	Glyma.18G296500.1_S69_1	T2E6.7_S69	Glyma.07G072100.1_T24_1	BSK3_T24	tl.0	dephosphorylation	4.11523e-18
Control	Glyma.18G296500.1_S69_1	T2E6.7_S69	Glyma.10G173000.1_S334_1	TOI5_S334	tl.0	dephosphorylation	4.11523e-18
Control	Glyma.18G296500.1_S69_1	T2E6.7_S69	Glyma.13G161700.1_S197_1	CRCK3_S197	tl.0	dephosphorylation	4.11523e-18
Control	Glyma.18G296500.1_S69_1	T2E6.7_S69	Glyma.15G074900.1_S59_1	Glyma.15G074900_S59	tl.0	dephosphorylation	4.11523e-18
Control	Glyma.18G296500.1_S69_1	T2E6.7_S69	Glyma.20G070700.1_S570_1	CPK1_S570	tl.0	dephosphorylation	4.11523e-18
Control	Glyma.19G007300.1_S335_1	TOT3_S335	Glyma.07G072100.1_T24_1	BSK3_T24	tl.0	dephosphorylation	1.46972e-19
Control	Glyma.19G007300.1_S335_1	TOT3_S335	Glyma.10G173000.1_S334_1	TOI5_S334	tl.0	dephosphorylation	1.46972e-19
Control	Glyma.19G007300.1_S335_1	TOT3_S335	Glyma.13G161700.1_S197_1	CRCK3_S197	tl.0	dephosphorylation	1.46972e-19
Control	Glyma.19G007300.1_S335_1	TOT3_S335	Glyma.15G074900.1_S59_1	Glyma.15G074900_S59	tl.0	phosphorylation	1.46972e-19
Control	Glyma.19G007300.1_S335_1	TOT3_S335	Glyma.20G070700.1_S570_1	CPK1_S570	tl.0	dephosphorylation	1.46972e-19
Control	Glyma.19G046800.1_S113_1	RBCS1B_S113	Glyma.10G173000.1_S334_1	TOI5_S334	tl.1	dephosphorylation	0.333333
Control	Glyma.19G046800.1_S113_1	RBCS1B_S113	Glyma.13G161700.1_S197_1	CRCK3_S197	tl.1	dephosphorylation	0.333333
Control	Glyma.19G092100.1_S300_1	Glyma.19G092100_S300	Glyma.10G173000.1_S334_1	TOI5_S334	tl.1	phosphorylation	0.333333
Control	Glyma.19G092100.1_S300_1	Glyma.19G092100_S300	Glyma.13G161700.1_S197_1	CRCK3_S197	tl.1	phosphorylation	0.333333
Control	Glyma.19G099000.1_T129_1	Glyma.19G099000_T129	Glyma.10G173000.1_S334_1	TOI5_S334	tl.0	dephosphorylation	4.11523e-18
Control	Glyma.19G099000.1_T129_1	Glyma.19G099000_T129	Glyma.13G161700.1_S197_1	CRCK3_S197	tl.0	undetermined	4.11523e-18
Control	Glyma.19G176200.1_S238_1	RSZ32_S238	Glyma.19G007300.1_S335_1	TOT3_S335	tl.0	dephosphorylation	6.17284e-19
Control	Glyma.19G210600.1_S171_1	p23-1_S171	Glyma.10G173000.1_S334_1	TOI5_S334	tl.1	phosphorylation	0.333333
Control	Glyma.19G210600.1_S171_1	p23-1_S171	Glyma.13G161700.1_S197_1	CRCK3_S197	tl.1	dephosphorylation	0.333333
Control	Glyma.19G217400.1_S138_1	Glyma.19G217400_S138	Glyma.19G007300.1_S335_1	TOT3_S335	tl.0	dephosphorylation	4.11523e-19
Control	Glyma.19G246000.1_S128_1	F20D21.28_S128	Glyma.07G072100.1_T24_1	BSK3_T24	tl.0	phosphorylation	1.46972e-19
Control	Glyma.19G246000.1_S128_1	F20D21.28_S128	Glyma.10G173000.1_S334_1	TOI5_S334	tl.0	dephosphorylation	1.46972e-19
Control	Glyma.19G246000.1_S128_1	F20D21.28_S128	Glyma.13G161700.1_S197_1	CRCK3_S197	tl.0	phosphorylation	1.46972e-19
Control	Glyma.19G246000.1_S128_1	F20D21.28_S128	Glyma.15G074900.1_S59_1	Glyma.15G074900_S59	tl.0	undetermined	1.46972e-19
Control	Glyma.19G246000.1_S128_1	F20D21.28_S128	Glyma.20G070700.1_S570_1	CPK1_S570	tl.0	phosphorylation	1.46972e-19
Control	Glyma.20G070700.1_S570_1	CPK1_S570	Glyma.07G072100.1_T24_1	BSK3_T24	tl.1	phosphorylation	0.333333
Control	Glyma.20G070700.1_S570_1	CPK1_S570	Glyma.10G173000.1_S334_1	TOI5_S334	tl.1	phosphorylation	0.333333
Control	Glyma.20G070700.1_S570_1	CPK1_S570	Glyma.13G161700.1_S197_1	CRCK3_S197	tl.1	phosphorylation	0.333333
Control	Glyma.20G084100.1_S138_1	YUP8H12.24_S138	Glyma.10G173000.1_S334_1	TOI5_S334	tl.1	dephosphorylation	0.333333
Control	Glyma.20G144400.1_S415_1	TIC_S415	Glyma.10G173000.1_S334_1	TOI5_S334	tl.1	phosphorylation	0.333333
Control	Glyma.20G166200.1_S687_1	Glyma.20G166200_S687	Glyma.10G173000.1_S334_1	TOI5_S334	tl.1	dephosphorylation	0.333333
Control	Glyma.20G166200.1_S687_1	Glyma.20G166200_S687	Glyma.13G161700.1_S197_1	CRCK3_S197	tl.1	phosphorylation	0.333333
Control	Glyma.20G191700.1_S21_2	BTR1_S21	Glyma.10G173000.1_S334_1	TOI5_S334	tl.0	phosphorylation	5.14403e-19
Control	Glyma.20G191700.1_S21_2	BTR1_S21	Glyma.13G161700.1_S197_1	CRCK3_S197	tl.0	dephosphorylation	5.14403e-19
Control	Glyma.20G191700.1_S21_2	BTR1_S21	Glyma.15G074900.1_S59_1	Glyma.15G074900_S59	tl.0	phosphorylation	5.14403e-19
Control	Glyma.20G191700.1_S28_2	BTR1_S28	Glyma.10G173000.1_S334_1	TOI5_S334	tl.0	phosphorylation	5.14403e-19
Control	Glyma.20G191700.1_S28_2	BTR1_S28	Glyma.13G161700.1_S197_1	CRCK3_S197	tl.0	dephosphorylation	5.14403e-19
Control	Glyma.20G191700.1_S28_2	BTR1_S28	Glyma.15G074900.1_S59_1	Glyma.15G074900_S59	tl.0	phosphorylation	5.14403e-19
Control	Glyma.20G199100.1_S214_1	Glyma.20G199100_S214	Glyma.19G007300.1_S335_1	TOT3_S335	tl.0	dephosphorylation	4.11523e-19
Control	Glyma.20G238400.1_S680_1	TPR3_S680	Glyma.10G173000.1_S334_1	TOI5_S334	tl.0	dephosphorylation	5.14403e-19
Control	Glyma.20G238400.1_S680_1	TPR3_S680	Glyma.13G161700.1_S197_1	CRCK3_S197	tl.0	dephosphorylation	5.14403e-19
Control	Glyma.20G238400.1_S680_1	TPR3_S680	Glyma.15G074900.1_S59_1	Glyma.15G074900_S59	tl.0	phosphorylation	5.14403e-19
Control	Glyma.20G244400.1_S189_1	T15C9.20_S189	Glyma.10G173000.1_S334_1	TOI5_S334	tl.1	phosphorylation	0.333333
Control	Glyma.20G244400.1_S189_1	T15C9.20_S189	Glyma.13G161700.1_S197_1	CRCK3_S197	tl.1	dephosphorylation	0.333333
Control	Glyma.20G244400.1_S189_1	T15C9.20_S189	Glyma.15G074900.1_S59_1	Glyma.15G074900_S59	tl.1	phosphorylation	0.333333
Control	Glyma.20G244400.1_S189_1	T15C9.20_S189	Glyma.20G070700.1_S570_1	CPK1_S570	tl.1	undetermined	0.333333
Control	Glyma.20G248100.1_S26_1	AKS2_S26	Glyma.08G037300.1_T220_1	CDKF;1_T220	tl.1	phosphorylation	8.81834e-20
Control	Glyma.U012400.1_T44_1	Glyma.U012400_T44	Glyma.08G037300.1_T220_1	CDKF;1_T220	tl.0	phosphorylation	2.05761e-19
