# Supplementary material for: Functional annotation of proteins for signaling network inference in non-model species
Source: Research Square preprint supplement (doi:10.21203/rs.3.rs-2201240/v1), 2022-11-11
Supplement: Supplementary file 7 [file a8176638104d4ce363571258.xlsx]

## Sheet: Blad1
Supplementary Table S1 - Identified phosphatases in soybean according to PF-NET, HMMER, and Arabidopsis orthologs (soybean genome reference assembly 2 version 1).
Gene	PF-NET	HMMER	Orthologs
Glyma.18G129700	Y	Y	Y
Glyma.02G025900	Y	Y	Y
Glyma.08G293400	Y	Y	Y
Glyma.01G038800	Y	Y	Y
Glyma.02G169200	Y	Y	Y
Glyma.03G206900	Y	Y	Y
Glyma.05G155300	Y	Y	Y
Glyma.08G113200	Y	Y	Y
Glyma.09G105000	Y	Y	Y
Glyma.19G204400	Y	Y	Y
Glyma.05G212100	Y	Y	Y
Glyma.08G018500	Y	Y	Y
Glyma.02G006000	Y	Y	Y
Glyma.02G251600	Y	Y	Y
Glyma.03G234700	Y	Y	Y
Glyma.03G251500	Y	Y	Y
Glyma.06G027300	Y	Y	Y
Glyma.10G006800	Y	Y	Y
Glyma.10G166700	Y	Y	Y
Glyma.10G186600	Y	Y	Y
Glyma.14G065200	Y	Y	Y
Glyma.19G232300	Y	Y	Y
Glyma.19G248700	Y	Y	Y
Glyma.20G203900	Y	Y	Y
Glyma.20G222500	Y	Y	Y
Glyma.14G195200	Y	Y	Y
Glyma.02G228200	Y	Y	Y
Glyma.11G170200	Y	Y	Y
Glyma.11G171600	Y	Y	Y
Glyma.18G061000	Y	Y	Y
Glyma.10G022700	Y	Y	Y
Glyma.02G151400	Y	Y	Y
Glyma.12G095300	Y	Y	Y
Glyma.12G189500	Y	Y	Y
Glyma.13G312300	Y	Y	Y
Glyma.19G230200	Y	Y	Y
Glyma.03G233300	Y	Y	Y
Glyma.10G149600	Y	Y	Y
Glyma.20G238700	Y	Y	Y
Glyma.04G038000	Y	Y	Y
Glyma.06G039000	Y	Y	Y
Glyma.10G271500	Y	Y	Y
Glyma.14G082200	Y	Y	Y
Glyma.17G243100	Y	Y	Y
Glyma.20G119100	Y	Y	Y
Glyma.06G054000	Y	Y	Y
Glyma.04G053800	Y	Y	Y
Glyma.14G108400	Y	Y	Y
Glyma.17G218700	Y	Y	Y
Glyma.01G225100	Y	Y	Y
Glyma.02G250200	Y	Y	Y
Glyma.05G227100	Y	Y	Y
Glyma.08G033800	Y	Y	Y
Glyma.09G066500	Y	Y	Y
Glyma.11G018000	Y	Y	Y
Glyma.11G222600	Y	Y	Y
Glyma.13G106800	Y	Y	Y
Glyma.14G066400	Y	Y	Y
Glyma.14G162100	Y	Y	Y
Glyma.17G052500	Y	Y	Y
Glyma.18G035000	Y	Y	Y
Glyma.19G069200	Y	Y	Y
Glyma.10G291800	Y	Y	Y
Glyma.04G059000	Y	Y	Y
Glyma.06G059700	Y	Y	Y
Glyma.13G042100	Y	Y	Y
Glyma.14G104900	Y	Y	Y
Glyma.14G161400	Y	Y	Y
Glyma.17G221100	Y	Y	Y
Glyma.20G241100	Y	Y	Y
Glyma.12G109500	Y	Y	Y
Glyma.06G296200	Y	Y	Y
Glyma.01G127600	Y	Y	Y
Glyma.03G043700	Y	Y	Y
Glyma.03G233500	Y	Y	Y
Glyma.06G050900	Y	Y	Y
Glyma.07G244700	Y	Y	Y
Glyma.08G259100	Y	Y	Y
Glyma.09G249700	Y	Y	Y
Glyma.09G280700	Y	Y	Y
Glyma.10G150100	Y	Y	Y
Glyma.12G202400	Y	Y	Y
Glyma.13G299300	Y	Y	Y
Glyma.14G093000	Y	Y	Y
Glyma.17G029200	Y	Y	Y
Glyma.17G230600	Y	Y	Y
Glyma.18G208100	Y	Y	Y
Glyma.18G242700	Y	Y	Y
Glyma.18G283300	Y	Y	Y
Glyma.19G230600	Y	Y	Y
Glyma.20G238100	Y	Y	Y
Glyma.20G248900	Y	Y	Y
Glyma.06G103100	Y	Y	Y
Glyma.04G101400	Y	Y	Y
Glyma.05G116800	Y	Y	Y
Glyma.08G071900	Y	Y	Y
Glyma.08G178800	Y	Y	Y
Glyma.15G053700	Y	Y	Y
Glyma.09G179200	Y	Y	Y
Glyma.07G099700	Y	Y	Y
Glyma.16G114700	Y	Y	Y
Glyma.09G195800	Y	Y	Y
Glyma.10G288800	Y	Y	Y
Glyma.10G288600	Y	Y	Y
Glyma.20G100200	Y	Y	Y
Glyma.09G285800	Y	Y	Y
Glyma.11G139500	Y	Y	Y
Glyma.12G063100	Y	Y	Y
Glyma.01G199600	Y	Y	Y
Glyma.03G225800	Y	Y	Y
Glyma.05G113400	Y	Y	Y
Glyma.07G131800	Y	Y	Y
Glyma.11G042300	Y	Y	Y
Glyma.17G153800	Y	Y	Y
Glyma.18G180400	Y	Y	Y
Glyma.19G222700	Y	Y	Y
Glyma.09G031700	Y	Y	Y
Glyma.02G009100	Y	Y	Y
Glyma.07G233000	Y	Y	Y
Glyma.10G009800	Y	Y	Y
Glyma.17G038000	Y	Y	Y
Glyma.20G173700	Y	Y	Y
Glyma.10G218100	Y	Y	Y
Glyma.08G081400	Y	Y	Y
Glyma.06G238200	Y	Y	Y
Glyma.06G290200	Y	Y	Y
Glyma.12G116800	Y	Y	Y
Glyma.12G226100	Y	Y	Y
Glyma.13G274800	Y	Y	Y
Glyma.U025900	Y	Y	Y
Glyma.06G060800	Y	Y	Y
Glyma.04G060300	Y	Y	Y
Glyma.04G060400	Y	Y	Y
Glyma.07G021700	Y	Y	Y
Glyma.08G220100	Y	Y	Y
Glyma.14G101400	Y	Y	Y
Glyma.17G223800	Y	Y	Y
Glyma.02G162300	Y	Y	Y
Glyma.14G051200	Y	Y	Y
Glyma.02G266300	Y	Y	Y
Glyma.08G311000	Y	Y	Y
Glyma.18G104600	Y	Y	Y
Glyma.17G144900	Y	Y	Y
Glyma.05G062900	Y	Y	Y
Glyma.05G225200	Y	Y	Y
Glyma.08G032000	Y	Y	Y
Glyma.06G071900	Y	Y	Y
Glyma.04G069900	Y	Y	Y
Glyma.01G158000	Y	Y	Y
Glyma.04G016100	Y	Y	Y
Glyma.06G016100	Y	Y	Y
Glyma.09G096600	Y	Y	Y
Glyma.11G087000	Y	Y	Y
Glyma.13G165300	Y	Y	Y
Glyma.15G201300	Y	Y	Y
Glyma.17G105800	Y	Y	Y
Glyma.19G069800	Y	Y	Y
Glyma.16G073500	Y	Y	Y
Glyma.01G111200	Y	Y	Y
Glyma.03G076800	Y	Y	Y
Glyma.03G152000	Y	Y	Y
Glyma.07G144500	Y	Y	Y
Glyma.18G196200	Y	Y	Y
Glyma.19G154500	Y	Y	Y
Glyma.17G016700	Y	Y	Y
Glyma.07G257400	Y	Y	Y
Glyma.10G294400	Y	Y	Y
Glyma.20G244300	Y	Y	Y
Glyma.02G044700	Y	Y	Y
Glyma.02G172900	Y	Y	Y
Glyma.03G176100	Y	Y	Y
Glyma.09G111300	Y	Y	Y
Glyma.10G047500	Y	Y	Y
Glyma.10G282900	Y	Y	Y
Glyma.13G135300	Y	Y	Y
Glyma.16G122200	Y	Y	Y
Glyma.19G147800	Y	Y	Y
Glyma.19G176600	Y	Y	Y
Glyma.20G106800	Y	Y	Y
Glyma.04G220900	Y	Y	Y
Glyma.06G145000	Y	Y	Y
Glyma.11G208900	Y	Y	Y
Glyma.10G200100	Y	Y	Y
Glyma.20G190400	Y	Y	Y
Glyma.07G239000	Y	Y	Y
Glyma.17G034500	Y	Y	Y
Glyma.15G139500	Y	Y	Y
Glyma.09G034800	Y	Y	Y
Glyma.15G100900	Y	Y	Y
Glyma.13G211800	Y	Y	Y
Glyma.07G253900	Y	Y	Y
Glyma.17G020400	Y	Y	Y
Glyma.10G182400	Y	Y	Y
Glyma.20G207600	Y	Y	Y
Glyma.10G004200	Y	Y	Y
Glyma.17G026100	Y	Y	Y
Glyma.07G248000	Y	Y	Y
Glyma.09G045100	Y	Y	Y
Glyma.14G017800	Y	Y	Y
Glyma.02G295600	Y	Y	Y
Glyma.06G130900	Y	Y	Y
Glyma.04G233900	Y	Y	Y
Glyma.10G259400	Y	Y	Y
Glyma.20G131500	Y	Y	Y
Glyma.01G191300	Y	Y	Y
Glyma.11G050900	Y	Y	Y
Glyma.01G239700	Y	Y	Y
Glyma.11G004000	Y	Y	Y
Glyma.13G348300	Y	Y	Y
Glyma.15G025700	Y	Y	Y
Glyma.08G008600	Y	Y	Y
Glyma.05G201200	Y	Y	Y
Glyma.04G200300	Y	Y	Y
Glyma.06G165300	Y	Y	Y
Glyma.10G071000	Y	Y
Glyma.17G109400	Y	Y
Glyma.17G244600	Y	Y
Glyma.17G125000	Y	Y
Glyma.09G248100	Y	Y
Glyma.09G229200	Y	Y
Glyma.09G060300	Y	Y
Glyma.09G225000	Y	Y
Glyma.04G128300	Y	Y
Glyma.04G059700	Y	Y
Glyma.07G047500	Y	Y
Glyma.07G047100	Y	Y
Glyma.15G166900	Y	Y
Glyma.13G155700	Y	Y
Glyma.13G280500	Y	Y
Glyma.13G161900	Y	Y
Glyma.02G231100	Y	Y
Glyma.02G117000	Y	Y
Glyma.02G290100	Y	Y
Glyma.02G192200	Y	Y
Glyma.19G193900	Y	Y
Glyma.19G194000	Y	Y
Glyma.19G026600	Y	Y
Glyma.19G261500	Y	Y
Glyma.19G062400	Y	Y
Glyma.03G194200	Y	Y
Glyma.03G194100	Y	Y
Glyma.20G011900	Y	Y
Glyma.20G026800	Y	Y
Glyma.05G042300	Y	Y
Glyma.05G047900	Y	Y
Glyma.05G138400	Y	Y
Glyma.05G138300	Y	Y
Glyma.05G247900	Y	Y
Glyma.05G247800	Y	Y
Glyma.11G209800	Y	Y
Glyma.11G255700	Y	Y
Glyma.14G198700	Y	Y
Glyma.14G024700	Y	Y
Glyma.14G080800	Y	Y
Glyma.08G291600	Y	Y
Glyma.08G056400	Y	Y
Glyma.08G093600	Y	Y
Glyma.08G093500	Y	Y
Glyma.08G351000	Y	Y
Glyma.08G093300	Y	Y
Glyma.08G314800	Y	Y
Glyma.12G221100	Y	Y
Glyma.12G219100	Y	Y
Glyma.12G007500	Y	Y
Glyma.12G012000	Y	Y
Glyma.06G176500	Y	Y
Glyma.06G028200	Y	Y
Glyma.06G176400	Y	Y
Glyma.06G170400	Y	Y
Glyma.06G170300	Y	Y
Glyma.06G028100	Y	Y
Glyma.18G132500	Y	Y
Glyma.18G244700	Y	Y
Glyma.18G001300	Y	Y
Glyma.16G209900	Y	Y
Glyma.16G015100	Y	Y
Glyma.16G016000	Y	Y
Glyma.10G279000	Y	Y
Glyma.02G095100	Y	Y
Glyma.19G129300	Y	Y
Glyma.03G126200	Y	Y
Glyma.20G110700	Y	Y
Glyma.05G174000	Y	Y
Glyma.11G243900	Y	Y
Glyma.08G131200	Y	Y
Glyma.18G013200	Y	Y
Glyma.18G286300	Y	Y
Glyma.15G172500	Y	Y
Glyma.U010500	Y		Y
Glyma.14G049600	Y		Y
Glyma.02G267900	Y		Y
Glyma.07G264400	Y		Y
Glyma.09G250700	Y		Y
Glyma.10G170900	Y		Y
Glyma.18G241800	Y		Y
Glyma.11G052700	Y		Y
Glyma.01G189500	Y		Y
Glyma.10G263700	Y		Y
Glyma.20G126600	Y		Y
Glyma.10G067300	Y		Y
Glyma.08G241500	Y		Y
Glyma.04G224100	Y
Glyma.02G268600	Y
Glyma.20G012300	Y
Glyma.14G048800	Y
Glyma.08G081300	Y
Glyma.01G005100	Y
Glyma.16G006900	Y
Glyma.16G082700	Y
Glyma.04G115800	Y
Glyma.05G137700	Y
Glyma.10G116900	Y
Glyma.17G159500	Y
Glyma.04G062800	Y
Glyma.02G251400	Y
Glyma.20G034600	Y
Glyma.01G195500	Y
Glyma.06G198600	Y
Glyma.18G034200	Y
Glyma.18G213700	Y
Glyma.07G176300		Y	Y
Glyma.03G043100		Y	Y
Glyma.03G044100		Y	Y
Glyma.08G258900		Y	Y
Glyma.10G297900		Y	Y
Glyma.20G173900		Y	Y
Glyma.04G146200		Y	Y
Glyma.09G194200		Y	Y
Glyma.01G146600		Y	Y
Glyma.02G144500		Y	Y
Glyma.18G196900		Y
Glyma.02G278100		Y
Glyma.20G035500		Y
Glyma.03G045200		Y
Glyma.15G052300		Y
Glyma.02G058600		Y
Glyma.03G262400		Y
Glyma.04G195600		Y
Glyma.02G097600			Y
Glyma.07G090200			Y
Glyma.09G185700			Y
Glyma.20G114000			Y
Glyma.10G275800			Y
Glyma.10G280500			Y
Glyma.20G173800			Y
Glyma.13G351800			Y
Glyma.15G022900			Y
Glyma.07G012000			Y
Glyma.08G195200			Y
Glyma.04G185200			Y
Glyma.14G171400			Y
Glyma.15G189600			Y
Glyma.05G112400			Y
Glyma.17G154600			Y
Glyma.03G076900			Y
Glyma.01G111300			Y
Glyma.12G086800			Y
Glyma.11G187700			Y
Glyma.07G241500			Y
Glyma.17G032400			Y
Glyma.09G037900			Y
Glyma.15G143000			Y
Glyma.10G201300			Y
Glyma.20G189100			Y
Glyma.15G152500			Y
Glyma.17G074500			Y
Glyma.02G203200			Y
Glyma.04G123600			Y
Glyma.04G165700			Y
Glyma.05G024500			Y
Glyma.06G196800			Y
Glyma.09G215100			Y
Glyma.14G102800			Y
Glyma.17G102800			Y
Glyma.17G222600			Y
Glyma.19G185200			Y
Glyma.16G128600			Y
Glyma.02G048300			Y
Glyma.01G166100			Y
Glyma.11G077300			Y
Glyma.18G146900			Y
Glyma.08G279700			Y
Glyma.01G023400			Y
