# Supplementary material for: Functional annotation of proteins for signaling network inference in non-model species
Source: Research Square preprint supplement (doi:10.21203/rs.3.rs-2201240/v1), 2022-11-11
Supplement: Supplementary file 8 [file c03b82715a49869947674ff6.xlsx]

## Sheet: Blad1
Supplementary Table S9 - PF-NET predictions for the entire maize, sorghum, wheat, and rice proteome.
Crop	Gene	Pred3	Pred2	Pred1	Prob3	Prob2	Prob1
Maize	Zm00001eb093920_P002	PF00505	PF10545	PF00249	0.00157904	0.00396643	0.992309
Maize	Zm00001eb093920_P001	PF00505	PF10545	PF00249	0.00278322	0.00513626	0.98955
Maize	Zm00001eb033650_P002	PF01852	PF03108	PF03987	0.0511566	0.0514833	0.0934036
Maize	Zm00001eb033650_P001	PF03987	PF03364	PF12928	0.0811409	0.0897388	0.10864
Maize	Zm00001eb392700_P004	PF00294	PF07228	PF00481	9.37915e-05	0.0328545	0.966913
Maize	Zm00001eb392700_P006	PF00626	PF07228	PF00481	2.42381e-05	0.0136381	0.986283
Maize	Zm00001eb392700_P001	PF00626	PF07228	PF00481	2.12275e-05	0.015088	0.984848
Maize	Zm00001eb392700_P003	PF00294	PF07228	PF00481	8.81966e-05	0.0295924	0.970148
Maize	Zm00001eb392700_P005	PF00626	PF07228	PF00481	2.10476e-05	0.0149668	0.984969
Maize	Zm00001eb392700_P002	PF00626	PF07228	PF00481	2.42381e-05	0.0136381	0.986283
Maize	Zm00001eb166650_P001	PF00135	PF01464	PF02469	0.00688039	0.0120177	0.92083
Maize	Zm00001eb305300_P001	PF00089	PF07714	PF00069	2.94054e-05	0.0304589	0.969429
Maize	Zm00001eb181300_P001	PF14634	PF13639	PF00097	0.0333711	0.43563	0.510409
Maize	Zm00001eb298920_P001	PF13456	PF00631	PF00307	0.0412099	0.0485983	0.0517697
Maize	Zm00001eb229510_P001	PF16953	PF03468	PF04782	0.067444	0.0745737	0.090705
Maize	Zm00001eb229510_P003	PF16953	PF03468	PF04782	0.067444	0.0745737	0.090705
Maize	Zm00001eb229510_P002	PF00615	PF04782	PF16953	0.0525196	0.0573344	0.0825265
Maize	Zm00001eb031900_P001	PF00291	PF09370	PF00814	0.0157987	0.034751	0.848253
Maize	Zm00001eb031900_P002	PF02776	PF01048	PF00814	0.0380949	0.366379	0.44111
Maize	Zm00001eb023090_P005	PF00175	PF08030	PF01794	0.134606	0.417841	0.424583
Maize	Zm00001eb023090_P001	PF08030	PF00175	PF01794	0.0639777	0.0990021	0.750251
Maize	Zm00001eb023090_P002	PF00175	PF08030	PF01794	0.166311	0.228992	0.568272
Maize	Zm00001eb023090_P003	PF07786	PF01578	PF01794	0.0419549	0.153995	0.726568
Maize	Zm00001eb023090_P004	PF00175	PF08030	PF01794	0.134606	0.417841	0.424583
Maize	Zm00001eb049510_P001	PF02453	PF16212	PF04536	0.0582639	0.0821367	0.189372
Maize	Zm00001eb386450_P001	PF00550	PF02037	PF00364	0.0773636	0.119224	0.178495
Maize	Zm00001eb211220_P002	PF03959	PF05057	PF01764	0.00456695	0.0816186	0.884353
Maize	Zm00001eb211220_P001	PF05057	PF01734	PF01764	0.0150704	0.0465363	0.912152
Maize	Zm00001eb162110_P001	PF00383	PF00462	PF00085	0.0267391	0.069351	0.842575
Maize	Zm00001eb412860_P001	PF00089	PF00082	PF00080	0.0971953	0.106815	0.356537
Maize	Zm00001eb348740_P002	PF09763	PF02854	PF04100	0.0794793	0.0936213	0.161941
Maize	Zm00001eb348740_P001	PF10545	PF01417	PF00472	0.0308837	0.0358211	0.0737086
Maize	Zm00001eb348740_P003	PF04100	PF00307	PF09763	0.0887163	0.0967137	0.323013
Maize	Zm00001eb272340_P001	PF00010	PF02179	PF17035	0.0954379	0.108301	0.120092
Maize	Zm00001eb154470_P001	PF01926	PF02463	PF00005	0.000752137	0.00129433	0.996251
Maize	Zm00001eb188380_P001	PF00170	PF13891	PF00010	0.000132416	0.000338288	0.999145
Maize	Zm00001eb188380_P003	PF00125	PF13891	PF00010	0.00011089	0.000269657	0.999432
Maize	Zm00001eb188380_P002	PF00125	PF13891	PF00010	0.000101983	0.000309333	0.999243
Maize	Zm00001eb359500_P001	PF00135	PF05678	PF00059	0.0287947	0.0306794	0.164897
Maize	Zm00001eb239740_P003	PF03522	PF13716	PF04757	0.0197234	0.0456865	0.0683807
Maize	Zm00001eb239740_P001	PF04757	PF00487	PF03015	0.0677242	0.0801992	0.101815
Maize	Zm00001eb239740_P002	PF13968	PF03798	PF04757	0.084987	0.126948	0.218433
Maize	Zm00001eb128470_P001	PF00651	PF10075	PF00134	0.000913574	0.0070678	0.991556
Maize	Zm00001eb128470_P002	PF02854	PF10075	PF00134	0.000177531	0.00534054	0.994131
Maize	Zm00001eb411020_P001	PF06813	PF01061	PF00999	0.136154	0.140709	0.173746
Maize	Zm00001eb334780_P001	PF13579	PF00534	PF06925	0.136724	0.18657	0.348245
Maize	Zm00001eb332090_P003	PF00916	PF06813	PF00999	0.083598	0.160549	0.416143
Maize	Zm00001eb332090_P001	PF00909	PF00999	PF06813	0.0624909	0.276759	0.405098
Maize	Zm00001eb332090_P002	PF00909	PF01061	PF06813	0.00104767	0.00869759	0.980451
Maize	Zm00001eb134000_P004	PF00024	PF00026	PF14543	0.190737	0.226988	0.270944
Maize	Zm00001eb134000_P002	PF00024	PF00026	PF14543	0.061183	0.389124	0.41742
Maize	Zm00001eb134000_P001	PF00024	PF00026	PF14543	0.14852	0.21736	0.357335
Maize	Zm00001eb134000_P003	PF00089	PF14543	PF00026	0.100281	0.215491	0.441334
Maize	Zm00001eb097490_P001	PF00673	PF01556	PF00334	0.0699438	0.111697	0.273889
Maize	Zm00001eb114770_P001	PF01432	PF03372	PF04572	0.07325	0.0882012	0.213216
Maize	Zm00001eb114770_P002	PF04572	PF00557	PF10536	0.0661146	0.0667644	0.0895196
Maize	Zm00001eb201780_P002	PF00472	PF05699	PF00248	0.0317203	0.034588	0.0739675
Maize	Zm00001eb201780_P001	PF00550	PF04755	PF00248	0.0466852	0.0519193	0.177106
Maize	Zm00001eb190140_P001	PF07557	PF02037	PF13178	0.0621046	0.065486	0.0882114
Maize	Zm00001eb030800_P001	PF00817	PF00293	PF00651	0.000710491	0.000897544	0.994808
Maize	Zm00001eb030800_P002	PF00817	PF00293	PF00651	0.000710491	0.000897544	0.994808
Maize	Zm00001eb352390_P002	PF08627	PF00892	PF03151	0.00618926	0.0405872	0.952432
Maize	Zm00001eb352390_P001	PF08627	PF00892	PF03151	0.00618925	0.0405871	0.952432
Maize	Zm00001eb376600_P003	PF07460	PF15477	PF13178	0.0354849	0.0356612	0.789455
Maize	Zm00001eb376600_P001	PF07460	PF15477	PF13178	0.0354849	0.0356612	0.789455
Maize	Zm00001eb376600_P004	PF07460	PF15477	PF13178	0.0354849	0.0356612	0.789455
Maize	Zm00001eb376600_P002	PF07460	PF15477	PF13178	0.0354849	0.0356612	0.789455
Maize	Zm00001eb376600_P005	PF07460	PF15477	PF13178	0.0354849	0.0356612	0.789455
Maize	Zm00001eb238510_P001	PF00582	PF00171	PF00631	0.0204095	0.0271135	0.143921
Maize	Zm00001eb206580_P001	PF00150	PF00497	PF04389	0.0674035	0.206476	0.277326
Maize	Zm00001eb281220_P001	PF03719	PF00505	PF05627	0.0570437	0.0642568	0.094205
Maize	Zm00001eb262150_P001	PF14237	PF00188	PF01471	0.024224	0.0263	0.0830886
Maize	Zm00001eb328760_P001	PF00754	PF13088	PF00930	0.0963391	0.12326	0.324384
Maize	Zm00001eb031980_P001	PF02263	PF04548	PF01926	0.0226258	0.0672578	0.867504
Maize	Zm00001eb092870_P002	PF14237	PF13393	PF00254	0.000398987	0.000717126	0.995315
Maize	Zm00001eb092870_P001	PF01928	PF00622	PF00254	0.000195006	0.000212466	0.998376
Maize	Zm00001eb403560_P002	PF00635	PF11976	PF00498	0.000672121	0.0183194	0.976158
Maize	Zm00001eb403560_P003	PF13180	PF11976	PF00498	0.000399312	0.00637184	0.991742
Maize	Zm00001eb403560_P001	PF14560	PF11976	PF00498	0.000282949	0.0076072	0.989476
Maize	Zm00001eb403560_P005	PF13180	PF11976	PF00498	0.000118387	0.00401429	0.995008
Maize	Zm00001eb403560_P004	PF13180	PF11976	PF00498	0.000120743	0.00438502	0.994561
Maize	Zm00001eb046830_P001	PF00024	PF00141	PF00651	0.0397511	0.0412655	0.0627378
Maize	Zm00001eb326510_P001	PF13902	PF00782	PF00102	0.100851	0.155423	0.233785
Maize	Zm00001eb370040_P001	PF00631	PF00137	PF06943	0.045241	0.101791	0.442717
Maize	Zm00001eb370040_P002	PF00631	PF00137	PF06943	0.0400649	0.0765009	0.46727
Maize	Zm00001eb034110_P001	PF00059	PF13456	PF12776	0.0358733	0.0381451	0.156505
Maize	Zm00001eb158540_P001	PF07145	PF10172	PF05678	0.0477527	0.114031	0.130208
Maize	Zm00001eb117360_P001	PF01094	PF00370	PF00141	0.0490032	0.066428	0.137694
Maize	Zm00001eb308680_P001	PF00076	PF00160	PF01243	0.0276928	0.0375718	0.0604636
Maize	Zm00001eb407980_P001	PF03015	PF02902	PF10551	0.0833944	0.0993611	0.102036
Maize	Zm00001eb183590_P002	PF12717	PF00888	PF05699	0.0693811	0.110856	0.199422
Maize	Zm00001eb183590_P001	PF12717	PF00888	PF05699	0.0693811	0.110856	0.199422
Maize	Zm00001eb357790_P002	PF14309	PF03031	PF13919	0.0551486	0.0587908	0.0830653
Maize	Zm00001eb357790_P004	PF13925	PF00646	PF13919	0.0386515	0.064857	0.188261
Maize	Zm00001eb357790_P005	PF00439	PF00443	PF00855	0.0496474	0.0537906	0.102685
Maize	Zm00001eb357790_P003	PF14309	PF03031	PF13919	0.0576382	0.0669721	0.09129
Maize	Zm00001eb357790_P001	PF00439	PF00443	PF00855	0.0496474	0.0537906	0.102685
Maize	Zm00001eb357790_P006	PF07744	PF00443	PF08646	0.0466942	0.0542602	0.0726823
Maize	Zm00001eb291880_P001	PF00534	PF03033	PF01408	0.0908596	0.105632	0.135626
Maize	Zm00001eb229630_P001	PF07992	PF04101	PF01467	0.143163	0.146525	0.161539
Maize	Zm00001eb229630_P002	PF00481	PF12706	PF00089	0.0514586	0.0525017	0.112461
Maize	Zm00001eb229630_P003	PF01467	PF00481	PF03016	0.0590039	0.0652234	0.106117
Maize	Zm00001eb137870_P002	PF00439	PF00855	PF10497	0.0674914	0.115013	0.369162
Maize	Zm00001eb137870_P001	PF00439	PF00855	PF10497	0.0674914	0.115013	0.369162
Maize	Zm00001eb137870_P003	PF00564	PF00536	PF05641	0.0565038	0.062362	0.0778186
Maize	Zm00001eb309490_P002	PF12717	PF10075	PF00134	0.000246705	0.00543403	0.992943
Maize	Zm00001eb309490_P001	PF12717	PF10075	PF00134	0.000248979	0.00546483	0.992892
Maize	Zm00001eb131550_P002	PF03478	PF07522	PF00646	0.069297	0.0727489	0.0913228
Maize	Zm00001eb131550_P004	PF07734	PF00646	PF03478	0.0386054	0.0440834	0.0500704
Maize	Zm00001eb131550_P003	PF08268	PF00089	PF03478	0.0429179	0.0449349	0.100859
Maize	Zm00001eb131550_P006	PF07734	PF00646	PF03478	0.0386054	0.0440834	0.0500704
Maize	Zm00001eb131550_P005	PF03478	PF07522	PF00646	0.069297	0.0727489	0.0913228
Maize	Zm00001eb131550_P001	PF09764	PF07522	PF03478	0.0687018	0.0697576	0.0983668
Maize	Zm00001eb207740_P001	PF00171	PF00141	PF13456	0.0566659	0.0698102	0.102055
Maize	Zm00001eb136480_P001	PF08240	PF13966	PF04828	0.0422265	0.100344	0.152532
Maize	Zm00001eb246170_P001	PF12937	PF18511	PF00646	0.22909	0.254697	0.439983
Maize	Zm00001eb185730_P002	PF00439	PF08729	PF12656	0.0857179	0.208268	0.312352
Maize	Zm00001eb185730_P001	PF00439	PF08729	PF12656	0.0857179	0.208268	0.312352
Maize	Zm00001eb382500_P001	PF13947	PF00754	PF00059	0.0740032	0.144666	0.273932
Maize	Zm00001eb167770_P002	PF04927	PF10172	PF05678	0.04361	0.258219	0.29872
Maize	Zm00001eb167770_P001	PF17780	PF00188	PF05678	0.064413	0.0689159	0.132753
Maize	Zm00001eb336020_P001	PF01636	PF07714	PF00069	0.000641783	0.0410496	0.95754
Maize	Zm00001eb281780_P001	PF13966	PF14244	PF00248	0.0502113	0.0810706	0.122561
Maize	Zm00001eb044300_P005	PF07748	PF00168	PF01170	0.0305617	0.0590787	0.0646984
Maize	Zm00001eb044300_P003	PF01909	PF10672	PF01170	0.0372695	0.0427677	0.13032
Maize	Zm00001eb044300_P002	PF01909	PF10672	PF01170	0.0372695	0.0427677	0.13032
Maize	Zm00001eb044300_P004	PF13091	PF07727	PF00168	0.0543718	0.112411	0.124977
Maize	Zm00001eb044300_P001	PF01909	PF10672	PF01170	0.0372696	0.0427678	0.13032
Maize	Zm00001eb273060_P001	PF00134	PF02140	PF00024	0.0307721	0.0386616	0.0437519
Maize	Zm00001eb146350_P001	PF00892	PF00361	PF01794	0.0781423	0.135712	0.337466
Maize	Zm00001eb360150_P003	PF01323	PF00085	PF00462	0.00201392	0.042236	0.943496
Maize	Zm00001eb360150_P002	PF01248	PF00327	PF17135	0.105731	0.136514	0.407245
Maize	Zm00001eb360150_P001	PF01248	PF00327	PF17135	0.105731	0.136514	0.407245
Maize	Zm00001eb314230_P003	PF08172	PF00615	PF01105	0.0986089	0.106582	0.182605
Maize	Zm00001eb314230_P002	PF08172	PF00615	PF01105	0.0986089	0.106582	0.182605
Maize	Zm00001eb314230_P001	PF08172	PF00615	PF01105	0.0986089	0.106582	0.182605
Maize	Zm00001eb105300_P003	PF12999	PF00076	PF12171	0.0695692	0.0829289	0.0896564
Maize	Zm00001eb105300_P004	PF12756	PF02892	PF12171	0.0239038	0.107347	0.657961
Maize	Zm00001eb105300_P001	PF00076	PF00098	PF12171	0.0950947	0.206984	0.301281
Maize	Zm00001eb105300_P002	PF12999	PF00076	PF12171	0.0695692	0.0829289	0.0896564
Maize	Zm00001eb207990_P001	PF01765	PF14364	PF07839	0.0549163	0.108442	0.521282
Maize	Zm00001eb207990_P006	PF00542	PF14364	PF07839	0.0288528	0.0307867	0.758554
Maize	Zm00001eb207990_P004	PF01765	PF14364	PF07839	0.044397	0.0560153	0.688443
Maize	Zm00001eb207990_P005	PF01765	PF14364	PF07839	0.0489134	0.104472	0.633706
Maize	Zm00001eb207990_P002	PF03763	PF14364	PF07839	0.0561252	0.12641	0.58662
Maize	Zm00001eb207990_P003	PF01765	PF14364	PF07839	0.0397645	0.0834827	0.658765
Maize	Zm00001eb386190_P001	PF00439	PF07839	PF00808	0.0815883	0.103687	0.236261
Maize	Zm00001eb386190_P002	PF00439	PF00125	PF00808	0.0352399	0.0401237	0.627718
Maize	Zm00001eb293260_P001	PF01103	PF00497	PF00168	0.042267	0.0551409	0.101459
Maize	Zm00001eb293260_P002	PF00849	PF00026	PF00168	0.0418425	0.0515149	0.203357
Maize	Zm00001eb116700_P001	PF01464	PF00188	PF13442	0.0789412	0.0992449	0.131849
Maize	Zm00001eb203710_P001	PF00109	PF01734	PF00141	0.0575555	0.0961237	0.160342
Maize	Zm00001eb049230_P001	PF13302	PF00646	PF13532	0.0603035	0.0715265	0.0718259
Maize	Zm00001eb181160_P001	PF13086	PF07728	PF00004	0.00521135	0.00772626	0.968524
Maize	Zm00001eb078300_P001	PF13180	PF12923	PF14204	0.0712779	0.0932831	0.239717
Maize	Zm00001eb078300_P002	PF17942	PF12923	PF14204	0.0923836	0.171566	0.178314
Maize	Zm00001eb396280_P001	PF13679	PF08241	PF01170	0.103031	0.107	0.114294
Maize	Zm00001eb199770_P003	PF00307	PF01466	PF13456	0.0517105	0.0633385	0.177805
Maize	Zm00001eb199770_P002	PF00481	PF01466	PF02823	0.0753242	0.0792236	0.182735
Maize	Zm00001eb199770_P001	PF00481	PF01466	PF02823	0.0753242	0.0792236	0.182735
Maize	Zm00001eb395980_P001	PF03629	PF13472	PF00657	1.81933e-05	0.0903939	0.909561
Maize	Zm00001eb143650_P001	PF13456	PF00271	PF01661	0.0428681	0.0479717	0.223432
Maize	Zm00001eb304470_P001	PF13943	PF00550	PF00542	0.0534214	0.160304	0.459696
Maize	Zm00001eb189150_P002	PF02225	PF01061	PF00497	0.0763994	0.0887027	0.0920877
Maize	Zm00001eb189150_P001	PF02225	PF01061	PF00497	0.0763994	0.0887027	0.0920877
Maize	Zm00001eb189150_P003	PF02225	PF01061	PF00497	0.0763994	0.0887027	0.0920877
Maize	Zm00001eb130180_P001	PF00787	PF05920	PF00046	0.0103266	0.382681	0.567223
Maize	Zm00001eb359440_P003	PF09405	PF06991	PF15477	0.114745	0.251217	0.252687
Maize	Zm00001eb232710_P001	PF03478	PF03101	PF12708	0.054644	0.0730816	0.220272
Maize	Zm00001eb232710_P002	PF03478	PF03101	PF12708	0.054644	0.0730816	0.220272
Maize	Zm00001eb184620_P001	PF08627	PF00892	PF03151	0.0563164	0.0868289	0.848228
Maize	Zm00001eb184620_P002	PF08627	PF00892	PF03151	0.0161466	0.141542	0.838754
Maize	Zm00001eb383580_P002	PF00581	PF03987	PF00550	0.0991439	0.113044	0.162008
Maize	Zm00001eb383580_P001	PF00581	PF03987	PF00550	0.0991439	0.113044	0.162008
Maize	Zm00001eb383580_P003	PF00581	PF03987	PF09346	0.080434	0.14952	0.505961
Maize	Zm00001eb345920_P001	PF03962	PF04782	PF03469	0.107131	0.192227	0.297456
Maize	Zm00001eb136040_P001	PF01753	PF00098	PF01485	0.0678821	0.0686751	0.0951522
Maize	Zm00001eb059880_P001	PF00010	PF16987	PF00307	0.0701855	0.0730833	0.119672
Maize	Zm00001eb059880_P002	PF05699	PF00443	PF03118	0.0455897	0.0466958	0.0701234
Maize	Zm00001eb263370_P001	PF05678	PF01471	PF00171	0.0234055	0.0412335	0.0620299
Maize	Zm00001eb069140_P005	PF00010	PF07716	PF00170	0.0196154	0.40051	0.53968
Maize	Zm00001eb069140_P002	PF10453	PF05678	PF10172	0.0307066	0.0628807	0.0844992
Maize	Zm00001eb069140_P006	PF00010	PF07716	PF00170	0.0175163	0.454776	0.484379
Maize	Zm00001eb069140_P003	PF00010	PF07716	PF00170	0.0177281	0.442402	0.503511
Maize	Zm00001eb069140_P001	PF00010	PF05678	PF10172	0.0321331	0.0613028	0.0910944
Maize	Zm00001eb069140_P004	PF13023	PF17874	PF01814	0.0756483	0.0771469	0.213195
Maize	Zm00001eb069140_P007	PF01636	PF02782	PF01814	0.0528049	0.0577611	0.0816527
Maize	Zm00001eb222530_P001	PF00244	PF02338	PF01909	0.0394463	0.0415745	0.048086
Maize	Zm00001eb217070_P001	PF03469	PF00249	PF12776	0.0636072	0.209275	0.279644
Maize	Zm00001eb010000_P001	PF00024	PF00234	PF14368	0.107582	0.311982	0.314627
Maize	Zm00001eb358930_P003	PF05362	PF00781	PF00590	0.000115454	0.00153522	0.998049
Maize	Zm00001eb358930_P002	PF00781	PF04101	PF00590	0.00198609	0.0025107	0.991936
Maize	Zm00001eb358930_P004	PF00781	PF04101	PF00590	0.00193991	0.00248692	0.992057
Maize	Zm00001eb358930_P001	PF05362	PF00781	PF00590	7.15839e-05	0.00192178	0.997692
Maize	Zm00001eb339180_P001	PF00403	PF00031	PF11938	0.124376	0.144882	0.243519
Maize	Zm00001eb322790_P001	PF07728	PF13086	PF00004	0.00680228	0.0120669	0.960572
Maize	Zm00001eb141850_P001	PF12678	PF00097	PF13639	0.0173855	0.123628	0.833325
Maize	Zm00001eb120850_P001	PF01902	PF00248	PF02441	0.00315541	0.0938087	0.859009
Maize	Zm00001eb356830_P001	PF10033	PF00168	PF13259	0.0668934	0.0828955	0.0871801
Maize	Zm00001eb218750_P002	PF00251	PF12894	PF08662	0.0444107	0.143055	0.608455
Maize	Zm00001eb218750_P003	PF13088	PF12894	PF08662	0.0685543	0.110424	0.483154
Maize	Zm00001eb218750_P001	PF12894	PF00251	PF08662	0.0992047	0.135616	0.514753
Maize	Zm00001eb217280_P001	PF14111	PF01852	PF00650	0.0437976	0.0822361	0.266801
Maize	Zm00001eb314640_P001	PF01852	PF00168	PF09588	0.0377974	0.0595261	0.0617742
Maize	Zm00001eb059740_P001	PF14780	PF05529	PF02453	0.0897399	0.111942	0.20733
Maize	Zm00001eb127300_P004	PF01323	PF12766	PF00188	0.063428	0.0887644	0.186425
Maize	Zm00001eb127300_P002	PF12014	PF12928	PF03987	0.0928031	0.148328	0.415257
Maize	Zm00001eb127300_P003	PF00133	PF00188	PF02897	0.0532502	0.0864586	0.138375
Maize	Zm00001eb127300_P001	PF12014	PF00622	PF03987	0.0603464	0.0620707	0.33103
Maize	Zm00001eb016150_P001	PF00635	PF00046	PF01778	0.0852525	0.095679	0.198232
Maize	Zm00001eb053010_P001	PF08652	PF00567	PF00626	0.069363	0.0880393	0.26684
Maize	Zm00001eb136140_P001	PF00171	PF00182	PF00665	0.0935078	0.140165	0.160405
Maize	Zm00001eb305010_P001	PF12937	PF18511	PF00646	0.0987343	0.198074	0.648415
Maize	Zm00001eb305010_P002	PF08387	PF12937	PF00646	0.0254538	0.188735	0.752307
Maize	Zm00001eb018880_P001	PF00271	PF00931	PF00004	0.0627711	0.0675481	0.482961
Maize	Zm00001eb426080_P001	PF02854	PF02179	PF00307	0.085485	0.0879589	0.18139
Maize	Zm00001eb134870_P001	PF13891	PF02037	PF00010	0.088255	0.120397	0.124478
Maize	Zm00001eb241710_P001	PF00550	PF13456	PF05699	0.050975	0.0600606	0.417609
Maize	Zm00001eb073280_P002	PF00076	PF14226	PF03732	0.0875487	0.107538	0.186445
Maize	Zm00001eb073280_P001	PF03101	PF03732	PF00076	0.0631213	0.160085	0.169787
Maize	Zm00001eb073280_P003	PF00076	PF03732	PF00141	0.0836054	0.0882264	0.123813
Maize	Zm00001eb230750_P002	PF03016	PF05686	PF01852	0.0206397	0.040647	0.801391
Maize	Zm00001eb230750_P001	PF03101	PF03108	PF01852	0.0573684	0.116036	0.515894
Maize	Zm00001eb013820_P001	PF05047	PF01541	PF01778	0.0891002	0.091758	0.102747
Maize	Zm00001eb417800_P001	PF08378	PF00168	PF09177	0.0618373	0.0631262	0.0759749
Maize	Zm00001eb012130_P004	PF00472	PF13328	PF00035	0.0531889	0.0676672	0.238758
Maize	Zm00001eb012130_P005	PF04782	PF00472	PF00035	0.0452883	0.144382	0.164283
Maize	Zm00001eb012130_P003	PF00076	PF00169	PF00035	0.0347892	0.0349659	0.499097
Maize	Zm00001eb012130_P002	PF00010	PF00169	PF00035	0.0416281	0.0492232	0.323868
Maize	Zm00001eb012130_P001	PF00010	PF00169	PF00035	0.0333051	0.0482698	0.307951
Maize	Zm00001eb050240_P001	PF00246	PF03104	PF16486	0.00116868	0.00161372	0.992233
Maize	Zm00001eb289530_P003	PF01699	PF01061	PF04893	0.0745248	0.0854225	0.378636
Maize	Zm00001eb289530_P002	PF01061	PF13962	PF04893	0.0795763	0.112009	0.47687
Maize	Zm00001eb289530_P005	PF01699	PF03151	PF04893	0.112076	0.137344	0.255325
Maize	Zm00001eb289530_P001	PF03151	PF01061	PF04893	0.0785148	0.145594	0.41849
Maize	Zm00001eb289530_P004	PF01699	PF01061	PF04893	0.0536692	0.0885732	0.639306
Maize	Zm00001eb038410_P001	PF02738	PF02737	PF00109	0.0603392	0.0605091	0.132345
Maize	Zm00001eb301390_P001	PF00089	PF07714	PF00069	0.000145095	0.0615776	0.937832
Maize	Zm00001eb125310_P001	PF07145	PF05627	PF05678	0.0311501	0.0375758	0.21742
Maize	Zm00001eb439690_P001	PF14237	PF00188	PF01471	0.024224	0.0263	0.0830886
Maize	Zm00001eb026980_P001	PF00657	PF01137	PF00501	0.034419	0.036776	0.0860135
Maize	Zm00001eb247320_P001	PF01323	PF00085	PF00462	0.000696086	0.00626483	0.990724
Maize	Zm00001eb213540_P001	PF01814	PF00210	PF00550	0.0832387	0.149231	0.150012
Maize	Zm00001eb040920_P001	PF01636	PF07714	PF00069	0.00266315	0.0410833	0.954712
Maize	Zm00001eb040920_P002	PF00307	PF01273	PF11721	0.0665894	0.188942	0.589427
Maize	Zm00001eb006860_P003	PF00004	PF07814	PF12348	0.0313715	0.0573703	0.491471
Maize	Zm00001eb006860_P001	PF07839	PF13178	PF05703	0.028804	0.0504818	0.166326
Maize	Zm00001eb006860_P004	PF00271	PF01399	PF04182	0.0757706	0.0860906	0.22645
Maize	Zm00001eb006860_P002	PF12169	PF07814	PF12348	0.0406489	0.0498903	0.338604
Maize	Zm00001eb377170_P001	PF02617	PF01248	PF00857	0.0670472	0.121627	0.15704
Maize	Zm00001eb305510_P001	PF03467	PF05627	PF00076	0.00217494	0.00258409	0.982394
Maize	Zm00001eb399990_P002	PF02737	PF03446	PF00091	0.0021016	0.00288695	0.984689
Maize	Zm00001eb399990_P001	PF03446	PF01565	PF00091	0.00503406	0.0058191	0.979944
Maize	Zm00001eb379340_P001	PF04675	PF00646	PF12937	0.0386787	0.130321	0.256632
Maize	Zm00001eb216810_P001	PF01699	PF01168	PF02518	0.0880262	0.128019	0.357703
Maize	Zm00001eb011120_P001	PF10520	PF14360	PF13962	0.0822644	0.0881645	0.41896
Maize	Zm00001eb344270_P001	PF00557	PF09588	PF10536	0.0530217	0.0549117	0.0747209
Maize	Zm00001eb391400_P001	PF00182	PF12999	PF03330	0.000654056	0.000681285	0.997504
Maize	Zm00001eb123700_P001	PF12680	PF00717	PF01243	0.0357075	0.122897	0.402543
Maize	Zm00001eb334210_P002	PF01565	PF01048	PF07228	0.0883459	0.102804	0.162294
Maize	Zm00001eb334210_P001	PF00591	PF02581	PF00294	0.000620513	0.00190833	0.996985
Maize	Zm00001eb334210_P003	PF00141	PF01565	PF13456	0.0493309	0.0593856	0.100854
Maize	Zm00001eb256610_P001	PF00462	PF00085	PF04828	0.0800622	0.102616	0.162967
Maize	Zm00001eb010150_P002	PF07744	PF00011	PF00447	0.05157	0.0523105	0.446281
Maize	Zm00001eb010150_P003	PF00536	PF07744	PF00447	0.0411826	0.0413809	0.508644
Maize	Zm00001eb010150_P001	PF07744	PF00011	PF00447	0.05157	0.0523105	0.446281
Maize	Zm00001eb018250_P002	PF00361	PF00909	PF13906	0.105274	0.29438	0.402077
Maize	Zm00001eb018250_P001	PF07884	PF07786	PF13906	0.104894	0.140942	0.277711
Maize	Zm00001eb236520_P001	PF04774	PF10187	PF09350	0.0742439	0.121979	0.135281
Maize	Zm00001eb236520_P003	PF04774	PF10187	PF09350	0.0742439	0.121979	0.135281
Maize	Zm00001eb236520_P004	PF04774	PF10187	PF09350	0.0742439	0.121979	0.135281
Maize	Zm00001eb236520_P002	PF09350	PF02179	PF10187	0.0490221	0.100238	0.239277
Maize	Zm00001eb260720_P005	PF03732	PF05843	PF00076	0.0263198	0.162329	0.765899
Maize	Zm00001eb260720_P004	PF00615	PF00076	PF05843	0.0368497	0.120323	0.768582
Maize	Zm00001eb260720_P002	PF03732	PF05843	PF00076	0.0417434	0.429284	0.451112
Maize	Zm00001eb260720_P001	PF00439	PF03732	PF12110	0.0495263	0.144624	0.279228
Maize	Zm00001eb260720_P003	PF00615	PF00076	PF05843	0.0323004	0.273271	0.628079
Maize	Zm00001eb112920_P001	PF01844	PF13976	PF13966	0.113852	0.123485	0.157025
Maize	Zm00001eb185100_P004	PF03810	PF03953	PF05699	0.0266719	0.027533	0.47595
Maize	Zm00001eb185100_P003	PF10172	PF05678	PF00505	0.0629468	0.172374	0.301522
Maize	Zm00001eb185100_P001	PF03467	PF04059	PF00076	0.00177337	0.0121414	0.981871
Maize	Zm00001eb185100_P002	PF02845	PF05678	PF13943	0.0664226	0.0820696	0.290982
Maize	Zm00001eb065640_P001	PF03330	PF02469	PF03168	0.00409076	0.00663447	0.964659
Maize	Zm00001eb030430_P001	PF14372	PF00651	PF00134	0.010166	0.0493662	0.87565
Maize	Zm00001eb030430_P002	PF00651	PF00382	PF00134	0.00328018	0.0154218	0.976515
Maize	Zm00001eb377350_P002	PF12776	PF03732	PF14244	0.0640595	0.0761172	0.107894
Maize	Zm00001eb377350_P001	PF13456	PF00307	PF12776	0.05989	0.0685296	0.180435
Maize	Zm00001eb055950_P001	PF01212	PF00266	PF00155	0.0238584	0.0611456	0.913561
Maize	Zm00001eb003070_P001	PF00139	PF03088	PF01823	0.0907572	0.0930664	0.255545
Maize	Zm00001eb003070_P002	PF00139	PF03088	PF01823	0.0907572	0.0930664	0.255545
Maize	Zm00001eb083480_P001	PF01565	PF02541	PF00107	0.0621416	0.0883352	0.145661
Maize	Zm00001eb246760_P003	PF00112	PF00188	PF00443	0.0853448	0.0965213	0.128213
Maize	Zm00001eb246760_P001	PF04153	PF05920	PF13259	0.0278782	0.0294588	0.518395
Maize	Zm00001eb246760_P004	PF00188	PF01844	PF10276	0.0717629	0.140054	0.402878
Maize	Zm00001eb246760_P002	PF04153	PF05920	PF13259	0.0278782	0.0294588	0.518395
Maize	Zm00001eb098630_P001	PF01106	PF01883	PF00403	0.000134904	0.000707551	0.998833
Maize	Zm00001eb299750_P002	PF02037	PF02201	PF00249	0.00168997	0.00188228	0.986277
Maize	Zm00001eb299750_P001	PF02037	PF02201	PF00249	0.00168997	0.00188228	0.986277
Maize	Zm00001eb246120_P001	PF02845	PF00011	PF04774	0.00554467	0.0107004	0.950163
Maize	Zm00001eb053770_P001	PF03143	PF16035	PF08030	0.0730582	0.075845	0.0760127
Maize	Zm00001eb242720_P002	PF02906	PF01753	PF00644	0.0115936	0.0148943	0.892683
Maize	Zm00001eb242720_P001	PF02906	PF01753	PF00644	0.0115936	0.0148943	0.892683
Maize	Zm00001eb142570_P001	PF13532	PF00646	PF11926	0.019981	0.2898	0.416724
Maize	Zm00001eb438700_P001	PF14237	PF00188	PF01471	0.024224	0.0263	0.0830886
Maize	Zm00001eb284080_P003	PF00144	PF07714	PF00069	0.00021913	0.111597	0.88745
Maize	Zm00001eb284080_P002	PF00168	PF07714	PF00069	1.40325e-05	0.0301104	0.969804
Maize	Zm00001eb284080_P001	PF00144	PF07714	PF00069	0.000156623	0.104566	0.894713
Maize	Zm00001eb348710_P001	PF13091	PF00271	PF00156	0.000130477	0.000493079	0.998799
Maize	Zm00001eb281040_P001	PF00294	PF13456	PF00481	0.055784	0.0729357	0.100444
Maize	Zm00001eb129010_P001	PF00505	PF10545	PF00249	0.000305745	0.000361888	0.998749
Maize	Zm00001eb368970_P002	PF00010	PF05920	PF00046	0.00102368	0.0672965	0.92879
Maize	Zm00001eb368970_P001	PF00135	PF05920	PF00046	0.000345361	0.0624688	0.935298
Maize	Zm00001eb291830_P001	PF00899	PF02737	PF01918	0.144982	0.14931	0.207563
Maize	Zm00001eb292190_P001	PF02298	PF00127	PF02221	0.0346742	0.0574318	0.642884
Maize	Zm00001eb022020_P001	PF08423	PF00004	PF00646	0.0745339	0.221361	0.295242
Maize	Zm00001eb057610_P001	PF14833	PF00248	PF01168	0.0385402	0.0649682	0.139558
Maize	Zm00001eb336700_P001	PF01471	PF01464	PF00188	0.0700023	0.0750929	0.098555
Maize	Zm00001eb408140_P001	PF01471	PF00188	PF00127	0.0412573	0.0509421	0.328649
Maize	Zm00001eb019010_P001	PF05899	PF04266	PF00407	0.0461023	0.0634977	0.0991131
Maize	Zm00001eb147610_P001	PF00685	PF03016	PF05686	0.00355686	0.393252	0.595256
Maize	Zm00001eb147610_P002	PF00534	PF05686	PF03016	0.0175189	0.0723222	0.906871
Maize	Zm00001eb422500_P002	PF03330	PF09430	PF03168	0.0130569	0.0461467	0.905693
Maize	Zm00001eb422500_P004	PF03330	PF09430	PF03168	0.0130569	0.0461467	0.905693
Maize	Zm00001eb422500_P003	PF03330	PF09430	PF03168	0.0328919	0.0369455	0.804284
Maize	Zm00001eb422500_P001	PF03330	PF09430	PF03168	0.0394181	0.048629	0.730753
Maize	Zm00001eb335320_P001	PF10545	PF02892	PF12171	0.0179681	0.320803	0.493416
Maize	Zm00001eb183790_P001	PF12796	PF00534	PF13844	0.0380227	0.0823779	0.141195
Maize	Zm00001eb070700_P001	PF01565	PF00089	PF00026	0.0368224	0.299457	0.368436
Maize	Zm00001eb070700_P003	PF05617	PF00188	PF00089	0.0596521	0.180927	0.455357
Maize	Zm00001eb070700_P002	PF00135	PF00026	PF00916	0.0488314	0.0654601	0.118841
Maize	Zm00001eb059510_P001	PF00141	PF00472	PF05047	0.027575	0.0627304	0.152153
Maize	Zm00001eb395060_P001	PF03328	PF00724	PF00141	1.36378e-06	4.79726e-06	0.99999
Maize	Zm00001eb113010_P001	PF01212	PF00266	PF00155	0.00386588	0.0397519	0.955413
Maize	Zm00001eb422090_P001	PF07724	PF00817	PF02861	0.0042608	0.0111304	0.948859
Maize	Zm00001eb163210_P001	PF01323	PF00085	PF00462	0.00141615	0.00656246	0.990498
Maize	Zm00001eb011980_P001	PF03372	PF00128	PF00149	0.000286259	0.00066855	0.997916
Maize	Zm00001eb117520_P001	PF01423	PF10260	PF04719	0.096141	0.12666	0.149957
Maize	Zm00001eb117520_P005	PF00787	PF00076	PF01423	0.0782679	0.097068	0.168729
Maize	Zm00001eb117520_P003	PF02893	PF01423	PF00076	0.0378549	0.0385176	0.302717
Maize	Zm00001eb117520_P006	PF04719	PF00076	PF01423	0.0813654	0.132843	0.153091
Maize	Zm00001eb117520_P004	PF00076	PF02229	PF01423	0.0785809	0.0922573	0.122155
Maize	Zm00001eb117520_P007	PF01423	PF10260	PF04719	0.0864589	0.0936842	0.171893
Maize	Zm00001eb117520_P002	PF00787	PF00076	PF01423	0.0650072	0.0929629	0.147146
Maize	Zm00001eb089840_P001	PF02769	PF01738	PF00657	0.0503361	0.0532801	0.0579306
Maize	Zm00001eb089840_P002	PF01170	PF08501	PF00107	0.0401294	0.0680933	0.0993496
Maize	Zm00001eb049780_P001	PF07962	PF00505	PF12656	0.0809531	0.0829042	0.102964
Maize	Zm00001eb049780_P002	PF00505	PF07962	PF12656	0.0732648	0.0901219	0.0935006
Maize	Zm00001eb379710_P001	PF01553	PF02714	PF08510	0.0425986	0.0920648	0.110036
Maize	Zm00001eb302250_P001	PF15511	PF00010	PF00125	0.000104801	0.00116123	0.998406
Maize	Zm00001eb304240_P001	PF05617	PF00234	PF14368	0.0855089	0.276773	0.279266
Maize	Zm00001eb041280_P001	PF10551	PF01553	PF03016	0.00777596	0.0129616	0.956335
Maize	Zm00001eb041280_P002	PF01553	PF05686	PF03016	0.00139496	0.00988184	0.98735
Maize	Zm00001eb047660_P001	PF13966	PF00149	PF14416	0.000232797	0.000844761	0.997739
Maize	Zm00001eb047660_P002	PF01753	PF00149	PF14416	0.00021813	0.000221973	0.998663
Maize	Zm00001eb430090_P001	PF00011	PF01926	PF03143	0.000186601	0.000303762	0.998047
Maize	Zm00001eb430090_P004	PF00004	PF04548	PF01926	0.105476	0.143377	0.520997
Maize	Zm00001eb430090_P002	PF00004	PF04548	PF01926	0.0805156	0.0841369	0.581878
Maize	Zm00001eb430090_P003	PF00004	PF04548	PF01926	0.0845959	0.0932394	0.579345
Maize	Zm00001eb401100_P001	PF00999	PF00916	PF00571	0.0873422	0.321288	0.355448
Maize	Zm00001eb166920_P001	PF00443	PF03108	PF02892	0.0505441	0.0586662	0.187415
Maize	Zm00001eb308620_P002	PF00883	PF02878	PF00291	0.0328429	0.239325	0.47098
Maize	Zm00001eb308620_P001	PF02878	PF00883	PF00291	0.122049	0.204927	0.219016
Maize	Zm00001eb157310_P001	PF03168	PF00144	PF02469	0.000201091	0.000280928	0.998239
Maize	Zm00001eb157310_P002	PF13180	PF03168	PF02469	0.000290629	0.00158429	0.996093
Maize	Zm00001eb355840_P003	PF02201	PF07962	PF09350	0.061839	0.0819064	0.083088
Maize	Zm00001eb355840_P002	PF02201	PF07962	PF09350	0.061839	0.0819064	0.083088
Maize	Zm00001eb355840_P001	PF05066	PF01432	PF09350	0.0603898	0.105256	0.173853
Maize	Zm00001eb430600_P002	PF01636	PF07714	PF00069	2.71676e-05	0.0225421	0.977409
Maize	Zm00001eb430600_P001	PF01636	PF07714	PF00069	2.71676e-05	0.0225421	0.977409
Maize	Zm00001eb075540_P001	PF00024	PF00135	PF14543	0.0377178	0.0404912	0.729217
Maize	Zm00001eb387870_P002	PF00097	PF00098	PF01485	0.0735511	0.126027	0.138011
Maize	Zm00001eb387870_P003	PF00856	PF00098	PF00059	0.0808752	0.110393	0.116417
Maize	Zm00001eb387870_P001	PF00098	PF10551	PF03372	0.0999151	0.108086	0.193904
Maize	Zm00001eb028650_P001	PF02668	PF03171	PF03372	0.0776284	0.115539	0.141823
Maize	Zm00001eb079390_P001	PF05703	PF12894	PF08662	0.053501	0.26815	0.376656
Maize	Zm00001eb354460_P001	PF03168	PF00497	PF02221	0.0832062	0.144461	0.220906
Maize	Zm00001eb279800_P002	PF01485	PF00646	PF01753	0.0298721	0.0883962	0.607503
Maize	Zm00001eb279800_P001	PF12937	PF01648	PF00646	0.0498882	0.160858	0.195749
Maize	Zm00001eb147510_P001	PF00730	PF01928	PF01636	0.155379	0.163614	0.315318
Maize	Zm00001eb019250_P001	PF06991	PF12325	PF08172	0.049684	0.0596045	0.23995
Maize	Zm00001eb019250_P002	PF06991	PF12325	PF08172	0.049684	0.0596045	0.23995
Maize	Zm00001eb155710_P001	PF01636	PF07714	PF00069	3.51679e-06	0.00731628	0.992677
Maize	Zm00001eb103260_P002	PF12680	PF00578	PF04187	0.0540332	0.087747	0.0902465
Maize	Zm00001eb103260_P001	PF00903	PF00578	PF00581	0.0604856	0.109385	0.255193
Maize	Zm00001eb103260_P003	PF00884	PF13532	PF01182	0.000222031	0.000272184	0.998676
Maize	Zm00001eb023480_P001	PF00808	PF00125	PF05678	0.112578	0.139872	0.276886
Maize	Zm00001eb270590_P001	PF07731	PF00149	PF12706	0.0979065	0.147426	0.272836
Maize	Zm00001eb168840_P001	PF00916	PF03151	PF00892	0.104231	0.1169	0.165366
Maize	Zm00001eb168840_P002	PF00999	PF00892	PF00916	0.12551	0.149688	0.150605
Maize	Zm00001eb090340_P001	PF00690	PF00955	PF00689	0.0410631	0.0483596	0.0575199
Maize	Zm00001eb018070_P001	PF10545	PF12776	PF00249	0.00185068	0.00842463	0.988559
Maize	Zm00001eb159710_P005	PF00271	PF04851	PF00270	0.0521048	0.123703	0.792589
Maize	Zm00001eb159710_P003	PF13086	PF04851	PF00270	0.018849	0.0218757	0.934105
Maize	Zm00001eb159710_P004	PF00271	PF04851	PF00270	0.0661665	0.131803	0.766753
Maize	Zm00001eb159710_P002	PF00004	PF04851	PF00271	0.0298348	0.0471341	0.709939
Maize	Zm00001eb159710_P001	PF00271	PF04851	PF00270	0.0252061	0.0741113	0.872191
Maize	Zm00001eb244080_P001	PF00542	PF01883	PF00550	0.0382164	0.0429347	0.700626
Maize	Zm00001eb244080_P003	PF01883	PF00171	PF00550	0.0490498	0.0545541	0.531754
Maize	Zm00001eb244080_P002	PF00542	PF01883	PF00550	0.0382164	0.0429347	0.700626
Maize	Zm00001eb005800_P001	PF00171	PF00501	PF05047	0.0257423	0.0301923	0.0326127
Maize	Zm00001eb005800_P002	PF00171	PF00501	PF05047	0.0257423	0.0301923	0.0326127
Maize	Zm00001eb153750_P002	PF00271	PF01243	PF00472	0.0270232	0.0330461	0.0484488
Maize	Zm00001eb153750_P001	PF00501	PF09348	PF00588	0.0410061	0.0512471	0.102807
Maize	Zm00001eb183220_P002	PF06943	PF03107	PF01485	0.117689	0.126599	0.18054
Maize	Zm00001eb183220_P004	PF01541	PF04828	PF01844	0.0293465	0.0720516	0.512321
Maize	Zm00001eb183220_P003	PF00111	PF00112	PF07884	0.0525203	0.101825	0.15022
Maize	Zm00001eb183220_P001	PF00097	PF03107	PF01485	0.0832707	0.113447	0.330472
Maize	Zm00001eb280980_P003	PF13906	PF01699	PF13962	0.0877997	0.142359	0.17571
Maize	Zm00001eb280980_P002	PF16212	PF13962	PF01699	0.0597473	0.114975	0.154552
Maize	Zm00001eb280980_P001	PF13906	PF13962	PF01699	0.0727879	0.0952827	0.0982665
Maize	Zm00001eb016420_P001	PF00505	PF05627	PF05678	0.0495578	0.094357	0.248573
Maize	Zm00001eb337350_P001	PF00505	PF02201	PF00249	0.0429258	0.0459788	0.416117
Maize	Zm00001eb337350_P002	PF00505	PF02201	PF00249	0.0450225	0.0467314	0.394178
Maize	Zm00001eb332510_P003	PF01565	PF01493	PF13720	0.00145735	0.0439127	0.947365
Maize	Zm00001eb332510_P001	PF03061	PF13720	PF01493	0.0464543	0.085825	0.168496
Maize	Zm00001eb332510_P002	PF00107	PF01493	PF13720	0.0014294	0.289679	0.686844
Maize	Zm00001eb269620_P001	PF00439	PF10453	PF00010	0.0624061	0.0782442	0.221058
Maize	Zm00001eb196520_P002	PF08172	PF00010	PF00170	0.128406	0.237276	0.325184
Maize	Zm00001eb196520_P001	PF08172	PF00010	PF00170	0.128406	0.237276	0.325184
Maize	Zm00001eb232220_P001	PF03810	PF12333	PF17781	0.000163605	0.000170845	0.99876
Maize	Zm00001eb289300_P001	PF00888	PF04782	PF00307	0.047493	0.0502049	0.065362
Maize	Zm00001eb289300_P002	PF12776	PF00443	PF04782	0.0561998	0.0642638	0.160979
Maize	Zm00001eb071530_P001	PF10276	PF17032	PF06943	0.120168	0.167475	0.207848
Maize	Zm00001eb100920_P003	PF00092	PF00085	PF00626	4.52107e-05	0.000189271	0.999462
Maize	Zm00001eb100920_P001	PF00171	PF00156	PF00626	0.0869913	0.0925519	0.149829
Maize	Zm00001eb100920_P002	PF00092	PF00085	PF00626	4.52107e-05	0.000189271	0.999462
Maize	Zm00001eb100920_P004	PF00092	PF00085	PF00626	4.61148e-05	0.000148961	0.999319
Maize	Zm00001eb091130_P001	PF13456	PF00536	PF00307	0.055301	0.0601458	0.160296
Maize	Zm00001eb047420_P001	PF13441	PF12999	PF03330	0.00110355	0.00124091	0.996867
Maize	Zm00001eb255120_P003	PF04366	PF01556	PF00254	0.000284248	0.000400149	0.998729
Maize	Zm00001eb255120_P005	PF00644	PF00622	PF00254	0.00117365	0.00348891	0.991448
Maize	Zm00001eb255120_P001	PF00622	PF00026	PF00254	0.000214364	0.000239847	0.998513
Maize	Zm00001eb255120_P002	PF00622	PF00026	PF00254	0.000214364	0.000239847	0.998513
Maize	Zm00001eb255120_P004	PF00622	PF00026	PF00254	0.000214364	0.000239847	0.998513
Maize	Zm00001eb282800_P001	PF00622	PF01699	PF02518	0.0436277	0.142479	0.362754
Maize	Zm00001eb282800_P002	PF00622	PF01699	PF02518	0.0436277	0.142479	0.362754
Maize	Zm00001eb295260_P001	PF00916	PF04893	PF13962	0.0461253	0.235086	0.260739
Maize	Zm00001eb238990_P003	PF00010	PF00170	PF07716	0.115203	0.120589	0.124958
Maize	Zm00001eb238990_P001	PF00010	PF00170	PF07716	0.115203	0.120589	0.124958
Maize	Zm00001eb238990_P002	PF00046	PF09405	PF00505	0.108918	0.194231	0.254151
Maize	Zm00001eb276140_P001	PF09763	PF16528	PF06148	0.064725	0.071042	0.463571
Maize	Zm00001eb159450_P001	PF13178	PF07716	PF00472	0.0545184	0.0648196	0.173676
Maize	Zm00001eb159450_P002	PF14383	PF02845	PF13178	0.0382613	0.0568296	0.179999
Maize	Zm00001eb028230_P001	PF13947	PF03024	PF00024	0.174903	0.20181	0.224662
Maize	Zm00001eb089200_P001	PF15477	PF04774	PF12656	0.0584569	0.0884212	0.0995307
Maize	Zm00001eb419240_P001	PF00857	PF01915	PF02698	0.0555189	0.0677472	0.116441
Maize	Zm00001eb027120_P001	PF12776	PF10545	PF09177	0.0291372	0.039857	0.72496
Maize	Zm00001eb338880_P001	PF01553	PF00303	PF00650	0.0787612	0.0908178	0.236832
Maize	Zm00001eb273890_P001	PF05687	PF00188	PF05678	0.0390816	0.044513	0.106066
Maize	Zm00001eb369180_P001	PF00542	PF05486	PF04419	0.0917878	0.0983611	0.121358
Maize	Zm00001eb061310_P002	PF00171	PF02775	PF00676	0.042048	0.10098	0.391719
Maize	Zm00001eb061310_P001	PF05008	PF01145	PF01105	0.000450579	0.0044938	0.987343
Maize	Zm00001eb218100_P001	PF00171	PF01844	PF00111	0.024165	0.0648529	0.0977094
Maize	Zm00001eb104740_P003	PF00089	PF00024	PF00188	0.0302232	0.306299	0.375162
Maize	Zm00001eb104740_P001	PF00188	PF02140	PF00024	0.0729725	0.0782936	0.452982
Maize	Zm00001eb104740_P002	PF00059	PF00188	PF00024	0.0403656	0.3192	0.332808
Maize	Zm00001eb247810_P001	PF00024	PF14368	PF00234	0.109629	0.220125	0.319401
Maize	Zm00001eb184170_P001	PF00443	PF03061	PF10536	0.031921	0.0331613	0.0621895
Maize	Zm00001eb430530_P001	PF00635	PF00076	PF00035	0.041939	0.185301	0.621486
Maize	Zm00001eb337670_P001	PF04757	PF07884	PF13966	0.051545	0.139708	0.164422
Maize	Zm00001eb195810_P002	PF01764	PF00082	PF05199	0.0533711	0.0685209	0.0989771
Maize	Zm00001eb195810_P001	PF00080	PF06911	PF00082	0.0432777	0.0692146	0.316827
Maize	Zm00001eb195810_P004	PF01661	PF00082	PF12656	0.0386364	0.0459981	0.0623846
Maize	Zm00001eb195810_P003	PF00080	PF06911	PF00082	0.0463514	0.10358	0.273733
Maize	Zm00001eb132590_P001	PF00505	PF00472	PF13867	0.100539	0.107047	0.208143
Maize	Zm00001eb270550_P001	PF00271	PF13456	PF00582	0.0286742	0.0452474	0.335115
Maize	Zm00001eb136780_P001	PF15511	PF00472	PF00808	0.0892311	0.111738	0.142483
Maize	Zm00001eb136780_P002	PF10241	PF00808	PF15511	0.111921	0.125746	0.170751
Maize	Zm00001eb007340_P001	PF13867	PF05678	PF08648	0.0788918	0.119352	0.171551
Maize	Zm00001eb363990_P001	PF00550	PF00198	PF06803	0.040986	0.141897	0.243307
Maize	Zm00001eb136670_P001	PF02263	PF04548	PF01926	0.0878849	0.129612	0.732081
Maize	Zm00001eb355150_P001	PF00042	PF10075	PF00134	0.0595939	0.111474	0.127847
Maize	Zm00001eb238440_P001	PF01485	PF00097	PF13639	0.00770066	0.0860253	0.891061
Maize	Zm00001eb133500_P001	PF00856	PF00564	PF10382	0.0361991	0.117541	0.138519
Maize	Zm00001eb133500_P003	PF00856	PF00564	PF10382	0.0330902	0.116985	0.142054
Maize	Zm00001eb133500_P002	PF00856	PF00564	PF10382	0.0361991	0.117541	0.138519
Maize	Zm00001eb029530_P005	PF00884	PF16656	PF00149	0.00174422	0.0172262	0.972654
Maize	Zm00001eb029530_P006	PF00754	PF16656	PF00149	0.0830696	0.102817	0.342763
Maize	Zm00001eb029530_P001	PF00884	PF16656	PF00149	0.00127066	0.0137048	0.97906
Maize	Zm00001eb029530_P002	PF00884	PF16656	PF00149	0.00127066	0.0137048	0.97906
Maize	Zm00001eb029530_P003	PF00754	PF16656	PF00149	0.0326731	0.150796	0.679148
Maize	Zm00001eb029530_P004	PF00754	PF16656	PF00149	0.0355513	0.149016	0.659301
Maize	Zm00001eb171570_P001	PF09430	PF07883	PF00190	0.000311327	0.0405848	0.958911
Maize	Zm00001eb199440_P001	PF00382	PF00441	PF02861	0.0431808	0.068362	0.0729226
Maize	Zm00001eb259130_P001	PF00884	PF00128	PF00149	0.000216262	0.000698851	0.998381
Maize	Zm00001eb259130_P003	PF13472	PF00657	PF00149	0.00232486	0.00320586	0.989982
Maize	Zm00001eb259130_P002	PF13472	PF00657	PF00149	0.00232486	0.00320586	0.989982
Maize	Zm00001eb290780_P004	PF00578	PF00092	PF03031	0.0409108	0.0467319	0.326535
Maize	Zm00001eb290780_P001	PF03732	PF00042	PF03031	0.0420182	0.0521977	0.20922
Maize	Zm00001eb290780_P003	PF01243	PF13902	PF00646	0.0347965	0.0451999	0.0711471
Maize	Zm00001eb290780_P002	PF01243	PF13902	PF00646	0.0354405	0.0439116	0.0692318
Maize	Zm00001eb282370_P001	PF00082	PF07228	PF00481	0.040894	0.0462611	0.124892
Maize	Zm00001eb168370_P001	PF00135	PF00361	PF00188	0.0411947	0.0418812	0.0575592
Maize	Zm00001eb225930_P001	PF14226	PF03732	PF04266	0.0912814	0.104845	0.213008
Maize	Zm00001eb123720_P001	PF09258	PF13091	PF04572	0.0980584	0.218044	0.276904
Maize	Zm00001eb008450_P001	PF00685	PF05686	PF04572	0.0877832	0.165964	0.336251
Maize	Zm00001eb008450_P002	PF09258	PF05686	PF04572	0.0720539	0.164111	0.512205
Maize	Zm00001eb260100_P001	PF05641	PF07522	PF00855	0.0475105	0.0988004	0.410513
Maize	Zm00001eb260100_P002	PF05641	PF07522	PF00855	0.0475105	0.0988004	0.410513
Maize	Zm00001eb260100_P003	PF05641	PF07522	PF00855	0.0475105	0.0988004	0.410513
Maize	Zm00001eb029520_P001	PF00218	PF00171	PF00542	0.0623901	0.0690914	0.0782623
Maize	Zm00001eb239820_P001	PF00011	PF02357	PF00168	0.0754826	0.0983669	0.204139
Maize	Zm00001eb149720_P002	PF08627	PF00892	PF01699	0.103616	0.119454	0.260965
Maize	Zm00001eb149720_P001	PF00137	PF00892	PF01699	0.0437354	0.048366	0.784099
Maize	Zm00001eb149720_P003	PF00137	PF00892	PF01699	0.0437354	0.048366	0.784099
Maize	Zm00001eb369320_P002	PF08378	PF00027	PF08969	0.0491899	0.0713858	0.162499
Maize	Zm00001eb369320_P001	PF00485	PF00027	PF08378	0.071059	0.176279	0.214647
Maize	Zm00001eb017870_P001	PF00501	PF13456	PF00134	0.0583143	0.0683761	0.0767555
Maize	Zm00001eb414420_P002	PF00069	PF03936	PF13961	0.0534332	0.062106	0.183817
Maize	Zm00001eb414420_P001	PF00112	PF03936	PF07727	0.0496326	0.0573869	0.0863731
Maize	Zm00001eb437100_P001	PF00909	PF01061	PF00999	0.114491	0.138359	0.258761
Maize	Zm00001eb053450_P001	PF00011	PF00171	PF01471	0.0338396	0.0375099	0.0575486
Maize	Zm00001eb221140_P002	PF14634	PF13639	PF00097	0.210263	0.213144	0.565144
Maize	Zm00001eb221140_P001	PF14634	PF13639	PF00097	0.238473	0.241118	0.496613
Maize	Zm00001eb356960_P001	PF00127	PF00080	PF00089	0.051742	0.102619	0.106812
Maize	Zm00001eb357060_P001	PF07557	PF10440	PF00631	0.0742931	0.123133	0.219775
Maize	Zm00001eb261050_P001	PF01471	PF00188	PF13441	0.0708475	0.133778	0.149618
Maize	Zm00001eb238690_P002	PF00059	PF00856	PF00089	0.0462521	0.0523098	0.245649
Maize	Zm00001eb238690_P001	PF00026	PF03478	PF00089	0.0231727	0.0317312	0.487693
Maize	Zm00001eb144760_P003	PF00676	PF00271	PF14204	0.00598239	0.00754057	0.909221
Maize	Zm00001eb144760_P004	PF00676	PF00439	PF14204	0.0183408	0.0273293	0.803203
Maize	Zm00001eb144760_P002	PF00271	PF01509	PF14204	0.000685229	0.00253077	0.992948
Maize	Zm00001eb144760_P001	PF00665	PF01028	PF14204	2.02285e-05	2.24064e-05	0.999822
Maize	Zm00001eb179220_P001	PF13639	PF12657	PF13881	0.0512746	0.114326	0.150567
Maize	Zm00001eb000720_P001	PF14159	PF13968	PF02453	0.0939781	0.248216	0.291871
Maize	Zm00001eb093600_P001	PF00498	PF10419	PF09816	0.0534846	0.0817358	0.212836
Maize	Zm00001eb023780_P004	PF00505	PF12776	PF00249	0.000912216	0.00263031	0.992347
Maize	Zm00001eb023780_P001	PF10545	PF12776	PF00249	0.00558154	0.00899746	0.975472
Maize	Zm00001eb023780_P002	PF01556	PF16486	PF00673	0.0324743	0.0338986	0.0597295
Maize	Zm00001eb023780_P003	PF10545	PF12776	PF00249	0.00354899	0.00967742	0.981675
Maize	Zm00001eb233700_P001	PF13088	PF13259	PF00754	0.0328906	0.0329043	0.202486
Maize	Zm00001eb062150_P001	PF03108	PF04059	PF00076	0.00499256	0.0119919	0.968964
Maize	Zm00001eb280320_P001	PF00089	PF00082	PF00112	0.000763289	0.00100397	0.99395
Maize	Zm00001eb073070_P001	PF08719	PF14303	PF12776	0.0366711	0.161504	0.485189
Maize	Zm00001eb161070_P001	PF00631	PF05687	PF05678	0.0435463	0.0452812	0.324543
Maize	Zm00001eb138460_P001	PF08212	PF12680	PF13474	0.0930606	0.127815	0.240045
Maize	Zm00001eb411130_P002	PF00010	PF04419	PF00319	2.83094e-05	2.98157e-05	0.999851
Maize	Zm00001eb411130_P004	PF04419	PF00010	PF00319	3.34747e-05	8.85871e-05	0.99975
Maize	Zm00001eb411130_P001	PF00010	PF04419	PF00319	2.83094e-05	2.98157e-05	0.999851
Maize	Zm00001eb411130_P005	PF00010	PF04419	PF00319	2.83094e-05	2.98157e-05	0.999851
Maize	Zm00001eb411130_P003	PF00010	PF04419	PF00319	2.83094e-05	2.98157e-05	0.999851
Maize	Zm00001eb346000_P001	PF13867	PF05678	PF00808	0.0370513	0.0978056	0.257469
Maize	Zm00001eb410370_P001	PF00657	PF00082	PF02469	0.0503013	0.062122	0.331318
Maize	Zm00001eb101820_P002	PF05699	PF00089	PF13532	0.059162	0.0608749	0.070858
Maize	Zm00001eb101820_P001	PF05699	PF13532	PF00089	0.0527567	0.0600871	0.0967061
Maize	Zm00001eb101820_P005	PF05699	PF00089	PF13532	0.0591619	0.0608748	0.070858
Maize	Zm00001eb101820_P006	PF05699	PF13532	PF00089	0.0527567	0.0600871	0.0967061
Maize	Zm00001eb101820_P004	PF05699	PF00089	PF13532	0.0591619	0.0608748	0.070858
Maize	Zm00001eb101820_P003	PF13532	PF03171	PF00089	0.046688	0.054739	0.0758049
Maize	Zm00001eb383060_P003	PF00004	PF00271	PF00270	0.0113749	0.0133238	0.942433
Maize	Zm00001eb383060_P004	PF00004	PF00271	PF00270	0.0169979	0.0440964	0.887296
Maize	Zm00001eb383060_P001	PF00271	PF00004	PF00270	0.0139418	0.0294274	0.915939
Maize	Zm00001eb383060_P002	PF00004	PF00271	PF00270	0.0113749	0.0133238	0.942433
Maize	Zm00001eb271710_P001	PF13878	PF02892	PF12171	0.05731	0.15644	0.277195
Maize	Zm00001eb223340_P001	PF14543	PF13947	PF02221	0.0449917	0.122259	0.547263
Maize	Zm00001eb223340_P002	PF14543	PF13947	PF02221	0.0449917	0.122259	0.547263
Maize	Zm00001eb395510_P002	PF13259	PF00135	PF05678	0.028458	0.0405208	0.257076
Maize	Zm00001eb395510_P001	PF13259	PF00135	PF05678	0.028458	0.0405208	0.257076
Maize	Zm00001eb193990_P001	PF05678	PF01243	PF00011	0.0377283	0.0395134	0.0540137
Maize	Zm00001eb032500_P005	PF10520	PF07786	PF00487	0.0293205	0.0508301	0.8497
Maize	Zm00001eb032500_P003	PF10520	PF07786	PF00487	0.0293205	0.0508301	0.8497
Maize	Zm00001eb032500_P002	PF10520	PF07786	PF00487	0.0293205	0.0508301	0.8497
Maize	Zm00001eb032500_P001	PF10520	PF07786	PF00487	0.0293205	0.0508301	0.8497
Maize	Zm00001eb032500_P004	PF07786	PF12076	PF00487	0.048265	0.0710865	0.38747
Maize	Zm00001eb410520_P001	PF10187	PF07557	PF02037	0.0920778	0.118554	0.144866
Maize	Zm00001eb311180_P001	PF00505	PF05920	PF00249	0.167798	0.229345	0.23974
Maize	Zm00001eb153050_P001	PF00651	PF00134	PF01814	0.0800023	0.113562	0.138975
Maize	Zm00001eb040580_P001	PF13019	PF06424	PF12656	0.0826671	0.0882381	0.400132
Maize	Zm00001eb040580_P003	PF13019	PF05678	PF12656	0.0717533	0.0781192	0.198886
Maize	Zm00001eb040580_P002	PF13019	PF06424	PF12656	0.072395	0.0915891	0.395947
Maize	Zm00001eb069690_P001	PF00089	PF07714	PF00069	0.000770982	0.0411134	0.957181
Maize	Zm00001eb421810_P001	PF02861	PF00696	PF00210	0.0330235	0.348628	0.455711
Maize	Zm00001eb093170_P001	PF10447	PF00849	PF00089	0.0614424	0.120655	0.244183
Maize	Zm00001eb048700_P001	PF12706	PF01494	PF00149	0.00227357	0.00405294	0.980199
Maize	Zm00001eb048700_P003	PF12706	PF01494	PF00149	0.00227356	0.00405291	0.980199
Maize	Zm00001eb048700_P002	PF12706	PF01494	PF00149	0.00227356	0.00405291	0.980199
Maize	Zm00001eb267820_P001	PF04187	PF01464	PF00497	0.0400817	0.22692	0.317754
Maize	Zm00001eb129070_P001	PF10440	PF00631	PF00808	0.0513395	0.0606257	0.316623
Maize	Zm00001eb123930_P001	PF00024	PF14368	PF00234	0.101108	0.155561	0.251259
Maize	Zm00001eb360620_P001	PF00454	PF07714	PF00069	1.24374e-05	0.021136	0.97883
Maize	Zm00001eb360620_P002	PF01636	PF07714	PF00069	7.63773e-06	0.0189815	0.980991
Maize	Zm00001eb170000_P001	PF02298	PF00188	PF00031	0.0772419	0.290507	0.293163
Maize	Zm00001eb399320_P001	PF00134	PF00042	PF13456	0.10016	0.14595	0.166774
Maize	Zm00001eb114950_P001	PF00856	PF08241	PF13649	0.0956701	0.271056	0.291228
Maize	Zm00001eb114950_P002	PF00856	PF08241	PF13649	0.0956701	0.271056	0.291228
Maize	Zm00001eb236250_P001	PF00089	PF12708	PF00082	0.0576808	0.28666	0.585129
Maize	Zm00001eb236250_P002	PF00089	PF12708	PF00082	0.0576808	0.28666	0.585129
Maize	Zm00001eb129670_P001	PF10497	PF00443	PF13259	0.0492517	0.0548693	0.0779603
Maize	Zm00001eb151960_P001	PF10172	PF00472	PF00505	0.0669909	0.0988212	0.11243
Maize	Zm00001eb285370_P001	PF05699	PF00650	PF00085	0.0289486	0.0386727	0.0823482
Maize	Zm00001eb201310_P001	PF14547	PF14368	PF00234	0.0554016	0.302544	0.318248
Maize	Zm00001eb170750_P001	PF04266	PF00169	PF00293	0.0386971	0.0762061	0.158304
Maize	Zm00001eb147270_P001	PF01423	PF00319	PF02338	0.0765296	0.0859927	0.106884
Maize	Zm00001eb039540_P001	PF14237	PF05627	PF06839	0.0903298	0.101847	0.276523
Maize	Zm00001eb223690_P001	PF00550	PF05699	PF05678	0.0430892	0.0494956	0.111087
Maize	Zm00001eb016490_P001	PF08450	PF00251	PF03088	0.00687218	0.0184545	0.954721
Maize	Zm00001eb213300_P001	PF12678	PF00097	PF13639	0.0321732	0.114128	0.832185
Maize	Zm00001eb015340_P004	PF04678	PF01435	PF02453	0.0913062	0.106693	0.205558
Maize	Zm00001eb015340_P002	PF05191	PF00690	PF16455	0.0311586	0.0981789	0.247143
Maize	Zm00001eb015340_P003	PF00690	PF01435	PF02453	0.0482184	0.0485376	0.532613
Maize	Zm00001eb015340_P001	PF06472	PF06974	PF02453	0.0718913	0.158112	0.396151
Maize	Zm00001eb253090_P003	PF11721	PF13180	PF02225	0.0597207	0.0841696	0.0895444
Maize	Zm00001eb253090_P002	PF11721	PF13180	PF02225	0.0597207	0.0841696	0.0895444
Maize	Zm00001eb253090_P001	PF11721	PF13180	PF02225	0.0597207	0.0841696	0.0895444
Maize	Zm00001eb394760_P002	PF00454	PF07714	PF00069	8.93492e-06	0.0174562	0.982506
Maize	Zm00001eb394760_P001	PF00454	PF07714	PF00069	3.9908e-05	0.0199661	0.979976
Maize	Zm00001eb408950_P001	PF00089	PF13947	PF00080	0.124345	0.15972	0.262126
Maize	Zm00001eb106060_P002	PF12656	PF00439	PF02338	0.0351347	0.0391581	0.0965971
Maize	Zm00001eb106060_P004	PF02845	PF02338	PF04824	0.0464835	0.0524305	0.0631771
Maize	Zm00001eb106060_P001	PF02845	PF02338	PF04824	0.0464835	0.0524305	0.0631771
Maize	Zm00001eb106060_P003	PF02338	PF00443	PF00615	0.0613066	0.0880941	0.144968
Maize	Zm00001eb016710_P001	PF10496	PF07000	PF09177	0.0351113	0.0588881	0.621659
Maize	Zm00001eb066700_P001	PF04675	PF02036	PF05191	0.0113601	0.0142799	0.902175
Maize	Zm00001eb228460_P001	PF00439	PF00182	PF00188	0.0524144	0.0968216	0.153727
Maize	Zm00001eb186920_P001	PF13968	PF02453	PF07885	0.0915002	0.102408	0.147413
Maize	Zm00001eb184350_P001	PF14383	PF02201	PF00646	0.0774651	0.125428	0.132251
Maize	Zm00001eb428040_P001	PF00483	PF00808	PF15511	0.000390157	0.00159715	0.997492
Maize	Zm00001eb279700_P001	PF00646	PF03719	PF13456	0.0381563	0.0604679	0.0773453
Maize	Zm00001eb229250_P002	PF03446	PF02826	PF00389	0.0290363	0.0442715	0.924778
Maize	Zm00001eb229250_P001	PF03446	PF02826	PF00389	0.0443029	0.075664	0.877811
Maize	Zm00001eb229250_P004	PF01408	PF02737	PF03446	0.086504	0.105488	0.672489
Maize	Zm00001eb229250_P003	PF03446	PF02826	PF00389	0.0463683	0.0722105	0.878084
Maize	Zm00001eb229250_P005	PF01408	PF02737	PF03446	0.110902	0.111144	0.563755
Maize	Zm00001eb286290_P001	PF02892	PF12171	PF00098	0.0462484	0.229696	0.402235
Maize	Zm00001eb299920_P002	PF03446	PF02826	PF00389	0.0351756	0.213684	0.750784
Maize	Zm00001eb299920_P001	PF03446	PF02826	PF00389	0.0351756	0.213684	0.750784
Maize	Zm00001eb299920_P003	PF03446	PF02826	PF00389	0.0351756	0.213684	0.750784
Maize	Zm00001eb027960_P002	PF00188	PF00644	PF00035	0.0525821	0.0559025	0.220617
Maize	Zm00001eb027960_P001	PF12656	PF00472	PF00035	0.0341081	0.0372528	0.355631
Maize	Zm00001eb231670_P001	PF03151	PF00501	PF00646	0.0423274	0.0427094	0.0806145
Maize	Zm00001eb391630_P001	PF14368	PF00234	PF14547	0.0116724	0.0162841	0.971669
Maize	Zm00001eb255910_P001	PF00254	PF00011	PF13180	0.112572	0.114927	0.162077
Maize	Zm00001eb069180_P001	PF00564	PF07707	PF00651	0.000511492	0.000686203	0.995953
Maize	Zm00001eb015410_P002	PF10453	PF00439	PF15511	0.0460518	0.0624571	0.190725
Maize	Zm00001eb015410_P001	PF15511	PF00505	PF14303	0.0592114	0.066351	0.0787416
Maize	Zm00001eb015410_P005	PF10545	PF00249	PF12776	0.122827	0.144116	0.518673
Maize	Zm00001eb015410_P004	PF10545	PF00249	PF12776	0.132586	0.149044	0.473889
Maize	Zm00001eb015410_P006	PF07716	PF00505	PF15511	0.05938	0.0702868	0.111449
Maize	Zm00001eb015410_P003	PF10545	PF00249	PF12776	0.132586	0.149044	0.473889
Maize	Zm00001eb015410_P007	PF14303	PF10545	PF12776	0.0642874	0.200423	0.608454
Maize	Zm00001eb156460_P001	PF06925	PF13579	PF00534	0.108229	0.129211	0.217553
Maize	Zm00001eb314000_P001	PF13178	PF02037	PF07647	0.0442543	0.0488013	0.0501454
Maize	Zm00001eb293450_P001	PF13579	PF06925	PF04101	0.0859562	0.166062	0.60133
Maize	Zm00001eb398110_P001	PF00249	PF05920	PF13259	0.080777	0.111995	0.325412
Maize	Zm00001eb389260_P001	PF01794	PF03151	PF00892	0.0640905	0.0876575	0.404693
Maize	Zm00001eb225390_P004	PF03441	PF00128	PF00150	0.0826644	0.0996017	0.188226
Maize	Zm00001eb225390_P001	PF03441	PF00128	PF00150	0.0826644	0.0996017	0.188226
Maize	Zm00001eb225390_P003	PF03441	PF00128	PF00150	0.0826644	0.0996017	0.188226
Maize	Zm00001eb225390_P002	PF00128	PF02836	PF00150	0.0121111	0.0421872	0.907673
Maize	Zm00001eb050600_P001	PF00564	PF04825	PF00501	0.0263193	0.0321054	0.237293
Maize	Zm00001eb105610_P001	PF00534	PF04101	PF13579	0.137789	0.149725	0.415491
Maize	Zm00001eb252130_P001	PF10419	PF12656	PF13180	0.0470641	0.223528	0.233364
Maize	Zm00001eb175180_P001	PF00291	PF00294	PF01048	0.0243806	0.0502958	0.773162
Maize	Zm00001eb175180_P002	PF00294	PF00857	PF01048	0.0441121	0.0466269	0.698365
Maize	Zm00001eb362220_P001	PF08423	PF00134	PF05699	0.0331577	0.0424402	0.124488
Maize	Zm00001eb419430_P001	PF01636	PF07714	PF00069	0.0018175	0.0238643	0.973852
Maize	Zm00001eb086960_P001	PF13439	PF13579	PF00534	0.0679423	0.3595	0.479336
Maize	Zm00001eb098420_P001	PF00125	PF04182	PF00849	0.046362	0.0464764	0.0521358
Maize	Zm00001eb327170_P001	PF00059	PF07915	PF05641	0.00818721	0.0147344	0.927547
Maize	Zm00001eb039650_P001	PF01841	PF00188	PF00112	1.35444e-05	2.57638e-05	0.999917
Maize	Zm00001eb324050_P001	PF02683	PF13441	PF00137	0.0545906	0.0692104	0.725954
Maize	Zm00001eb180690_P001	PF14547	PF14368	PF00234	0.0237837	0.327177	0.567089
Maize	Zm00001eb197620_P002	PF02201	PF15511	PF00808	0.00302343	0.00327194	0.989509
Maize	Zm00001eb197620_P001	PF02201	PF07524	PF00808	0.00233015	0.00387772	0.990884
Maize	Zm00001eb010310_P001	PF14383	PF12214	PF03941	0.0762593	0.0770964	0.335957
Maize	Zm00001eb010310_P003	PF13919	PF12214	PF03941	0.0828799	0.0972671	0.269208
Maize	Zm00001eb010310_P002	PF13919	PF03941	PF13259	0.0564505	0.0883944	0.0899456
Maize	Zm00001eb010310_P004	PF14383	PF13919	PF03941	0.0688809	0.0971757	0.204587
Maize	Zm00001eb435050_P001	PF11976	PF00571	PF02874	0.0687229	0.0995446	0.133076
Maize	Zm00001eb435050_P002	PF00004	PF00005	PF00006	0.0386744	0.210956	0.626847
Maize	Zm00001eb033120_P001	PF07977	PF01575	PF03061	0.0112555	0.0726156	0.894522
Maize	Zm00001eb435900_P001	PF14237	PF00188	PF01471	0.024224	0.0263	0.0830887
Maize	Zm00001eb369240_P005	PF08969	PF11717	PF04212	0.0279445	0.0317571	0.61175
Maize	Zm00001eb369240_P002	PF07808	PF14204	PF10213	0.0653027	0.126839	0.518057
Maize	Zm00001eb369240_P004	PF08969	PF11717	PF04212	0.0279445	0.0317571	0.61175
Maize	Zm00001eb369240_P003	PF07808	PF14204	PF10213	0.0653027	0.126839	0.518057
Maize	Zm00001eb369240_P001	PF14204	PF08573	PF10213	0.115625	0.122548	0.366842
Maize	Zm00001eb051230_P003	PF00631	PF05687	PF00249	0.0328079	0.0386103	0.061554
Maize	Zm00001eb051230_P002	PF00141	PF02892	PF01466	0.0630327	0.0790292	0.11096
Maize	Zm00001eb051230_P001	PF00141	PF02892	PF01466	0.0630327	0.0790292	0.11096
Maize	Zm00001eb229160_P001	PF05617	PF14368	PF00234	0.109422	0.201138	0.2843
Maize	Zm00001eb203570_P004	PF07228	PF00069	PF00481	0.213485	0.223739	0.421126
Maize	Zm00001eb203570_P001	PF00027	PF07714	PF00069	0.00592577	0.0478918	0.923855
Maize	Zm00001eb203570_P002	PF07228	PF00481	PF00069	0.0763142	0.13282	0.6999
Maize	Zm00001eb203570_P003	PF00626	PF07228	PF00481	0.00308988	0.0499928	0.936598
Maize	Zm00001eb244390_P004	PF14634	PF13639	PF00097	0.0528664	0.403053	0.524364
Maize	Zm00001eb244390_P002	PF14634	PF00097	PF13639	0.0365929	0.289804	0.605467
Maize	Zm00001eb244390_P001	PF14634	PF00097	PF13639	0.0544685	0.288302	0.605164
Maize	Zm00001eb244390_P003	PF14634	PF00097	PF13639	0.0433249	0.451813	0.479557
Maize	Zm00001eb306830_P001	PF00717	PF00190	PF07883	0.105688	0.122631	0.123697
Maize	Zm00001eb107060_P001	PF00102	PF07714	PF00069	0.0300813	0.0306544	0.0415043
Maize	Zm00001eb368860_P001	PF11789	PF01844	PF05920	0.0561116	0.0882271	0.0990278
Maize	Zm00001eb335840_P001	PF00443	PF00646	PF00651	0.046821	0.0508301	0.0892735
Maize	Zm00001eb249260_P001	PF07228	PF00481	PF01088	0.00060775	0.0012019	0.99646
Maize	Zm00001eb311060_P001	PF05529	PF02845	PF14364	0.0518205	0.177317	0.665816
Maize	Zm00001eb430140_P001	PF13259	PF00631	PF12656	0.0362329	0.0666506	0.114311
Maize	Zm00001eb290140_P001	PF01852	PF03364	PF00407	0.00214035	0.137679	0.833007
Maize	Zm00001eb099240_P001	PF00076	PF05678	PF00035	0.0981439	0.104091	0.411823
Maize	Zm00001eb099240_P003	PF03467	PF00076	PF00447	0.0544494	0.0878713	0.129962
Maize	Zm00001eb099240_P002	PF00035	PF00076	PF05678	0.119164	0.12174	0.305392
Maize	Zm00001eb424350_P002	PF04893	PF02683	PF13386	0.0447866	0.305338	0.38199
Maize	Zm00001eb424350_P001	PF06803	PF14237	PF04893	0.0647645	0.151919	0.559095
Maize	Zm00001eb190800_P001	PF00026	PF00857	PF01872	0.0366282	0.040821	0.0490442
Maize	Zm00001eb271010_P001	PF03478	PF02362	PF12928	0.0528765	0.0657149	0.121905
Maize	Zm00001eb271010_P002	PF08547	PF07534	PF02362	0.0562112	0.0757754	0.157332
Maize	Zm00001eb235330_P001	PF13088	PF08450	PF03088	0.0763006	0.0893731	0.162914
Maize	Zm00001eb252050_P002	PF08172	PF05008	PF10496	0.133121	0.219747	0.455902
Maize	Zm00001eb252050_P003	PF08172	PF05008	PF10496	0.133121	0.219747	0.455902
Maize	Zm00001eb252050_P001	PF08172	PF05008	PF10496	0.133121	0.219747	0.455902
Maize	Zm00001eb195770_P001	PF05182	PF00447	PF00855	0.0650732	0.13774	0.206476
Maize	Zm00001eb356290_P001	PF05703	PF02453	PF00690	0.0538146	0.0575298	0.0587009
Maize	Zm00001eb293970_P002	PF00069	PF04428	PF01636	0.00283758	0.00795293	0.98375
Maize	Zm00001eb293970_P001	PF09346	PF04428	PF01636	0.00706784	0.0212485	0.958361
Maize	Zm00001eb102210_P001	PF07145	PF05678	PF04774	0.0369439	0.049145	0.0860661
Maize	Zm00001eb102210_P002	PF02845	PF13259	PF13178	0.0669683	0.129918	0.202536
Maize	Zm00001eb221970_P003	PF08030	PF13456	PF12076	0.0188796	0.0585243	0.706451
Maize	Zm00001eb221970_P001	PF08030	PF01794	PF12076	0.00192122	0.00384275	0.981797
Maize	Zm00001eb221970_P002	PF01852	PF13456	PF12076	0.00187722	0.00224935	0.970837
Maize	Zm00001eb200050_P001	PF00109	PF00195	PF08541	0.236735	0.247229	0.366168
Maize	Zm00001eb017730_P001	PF00909	PF00137	PF06813	0.0785141	0.0959334	0.669127
Maize	Zm00001eb127560_P001	PF00188	PF00089	PF05703	0.0417017	0.054275	0.118103
Maize	Zm00001eb297740_P002	PF00646	PF12894	PF08662	0.0148195	0.198734	0.732711
Maize	Zm00001eb297740_P001	PF13088	PF12894	PF08662	0.0203381	0.121873	0.834713
Maize	Zm00001eb297740_P003	PF00646	PF12894	PF08662	0.0109514	0.253684	0.694011
Maize	Zm00001eb434090_P002	PF10551	PF00271	PF17177	0.0324069	0.0713122	0.47415
Maize	Zm00001eb434090_P003	PF14432	PF11835	PF00076	0.0100595	0.0162456	0.897277
Maize	Zm00001eb434090_P004	PF00899	PF00271	PF17177	0.0440016	0.107555	0.445244
Maize	Zm00001eb434090_P001	PF14432	PF11835	PF00076	0.0100595	0.0162456	0.897277
Maize	Zm00001eb434090_P005	PF14432	PF11835	PF00076	0.0100595	0.0162456	0.897277
Maize	Zm00001eb292810_P001	PF00542	PF01471	PF00141	0.0646872	0.0730405	0.130429
Maize	Zm00001eb317360_P001	PF07885	PF00892	PF01699	0.126272	0.137307	0.139248
Maize	Zm00001eb036740_P001	PF13302	PF09348	PF01648	0.0448133	0.0587629	0.094263
Maize	Zm00001eb191670_P001	PF02602	PF12937	PF00646	0.11047	0.118095	0.230347
Maize	Zm00001eb292920_P001	PF00454	PF07714	PF00069	5.00045e-05	0.0273028	0.972597
Maize	Zm00001eb408790_P003	PF00615	PF08378	PF02854	0.0358412	0.0552238	0.0597751
Maize	Zm00001eb408790_P001	PF02201	PF00439	PF11955	0.0467408	0.0552241	0.185627
Maize	Zm00001eb408790_P002	PF00615	PF08378	PF02854	0.0358411	0.0552237	0.0597751
Maize	Zm00001eb311730_P002	PF17801	PF00150	PF00128	0.0136566	0.0354793	0.947615
Maize	Zm00001eb311730_P001	PF17801	PF00150	PF00128	0.0136566	0.0354793	0.947615
Maize	Zm00001eb003300_P001	PF08241	PF03372	PF00646	0.0374581	0.0414342	0.174581
Maize	Zm00001eb400040_P001	PF00403	PF00542	PF06916	0.0538916	0.0589663	0.0917449
Maize	Zm00001eb296980_P001	PF00635	PF17766	PF02221	0.115303	0.152726	0.166013
Maize	Zm00001eb262320_P001	PF14237	PF00188	PF01471	0.024224	0.0263	0.0830886
Maize	Zm00001eb000930_P001	PF13086	PF07728	PF00004	0.0149126	0.0174104	0.945826
Maize	Zm00001eb187550_P001	PF00550	PF03810	PF00248	0.0431461	0.0918532	0.214319
Maize	Zm00001eb092520_P002	PF13878	PF00635	PF05678	0.0503079	0.116579	0.194492
Maize	Zm00001eb092520_P001	PF05678	PF00635	PF13178	0.0501378	0.0598516	0.0628822
Maize	Zm00001eb051670_P001	PF00059	PF05699	PF02320	0.0294862	0.0295275	0.641389
Maize	Zm00001eb148130_P002	PF01494	PF07228	PF00481	0.000543745	0.357037	0.638855
Maize	Zm00001eb148130_P001	PF01138	PF07228	PF00481	1.12993e-05	0.00758652	0.99239
Maize	Zm00001eb071600_P001	PF01397	PF01743	PF10551	0.0491465	0.0762307	0.0903313
Maize	Zm00001eb186140_P001	PF11976	PF00808	PF05678	0.0320969	0.0931298	0.133202
Maize	Zm00001eb273460_P001	PF02698	PF13649	PF08241	0.0868579	0.0887208	0.363008
Maize	Zm00001eb390340_P001	PF00134	PF05699	PF00361	0.025672	0.0280078	0.0328235
Maize	Zm00001eb258100_P002	PF00657	PF17801	PF00150	0.122725	0.139863	0.229516
Maize	Zm00001eb258100_P001	PF00150	PF00144	PF17801	0.0872209	0.211786	0.244048
Maize	Zm00001eb157860_P002	PF00010	PF00170	PF07716	0.00278445	0.301004	0.691708
Maize	Zm00001eb157860_P001	PF00010	PF00170	PF07716	0.0110402	0.370399	0.61492
Maize	Zm00001eb275000_P001	PF00085	PF02225	PF00497	0.0505025	0.0699454	0.105874
Maize	Zm00001eb432630_P001	PF00999	PF00361	PF00141	0.0524525	0.05612	0.168894
Maize	Zm00001eb347970_P001	PF12656	PF08648	PF04774	0.0644448	0.185051	0.353879
Maize	Zm00001eb079410_P001	PF13649	PF13847	PF01170	0.187806	0.195324	0.288598
Maize	Zm00001eb426290_P001	PF02225	PF00060	PF01061	0.0609319	0.101708	0.122076
Maize	Zm00001eb367950_P001	PF00498	PF00011	PF02195	0.0460724	0.0532177	0.0602321
Maize	Zm00001eb366950_P001	PF05686	PF04784	PF04572	0.0820955	0.0916268	0.23416
Maize	Zm00001eb232650_P001	PF00011	PF00631	PF05678	0.0368279	0.0386134	0.191492
Maize	Zm00001eb119990_P001	PF03167	PF13472	PF00657	0.000211743	0.215475	0.784007
Maize	Zm00001eb119990_P002	PF03629	PF13472	PF00657	0.00022203	0.228216	0.770951
Maize	Zm00001eb079720_P001	PF02893	PF01423	PF00168	0.0660091	0.0853808	0.395281
Maize	Zm00001eb227530_P001	PF06916	PF07884	PF02453	0.047053	0.0534541	0.0898287
Maize	Zm00001eb090980_P003	PF07859	PF05057	PF01764	0.00852351	0.220289	0.700527
Maize	Zm00001eb090980_P001	PF07859	PF05057	PF01764	0.0105704	0.138363	0.785257
Maize	Zm00001eb090980_P004	PF00561	PF05057	PF01764	0.0241215	0.0772836	0.796205
Maize	Zm00001eb090980_P002	PF07859	PF05057	PF01764	0.0198386	0.176473	0.695062
Maize	Zm00001eb090980_P005	PF00561	PF05057	PF01764	0.0395896	0.0813795	0.757501
Maize	Zm00001eb237110_P001	PF13906	PF00999	PF00361	0.146114	0.19742	0.432025
Maize	Zm00001eb413410_P002	PF02201	PF02179	PF00439	0.0469279	0.101992	0.164092
Maize	Zm00001eb413410_P001	PF08574	PF02179	PF00439	0.0598558	0.140298	0.187482
Maize	Zm00001eb168190_P002	PF08378	PF00481	PF01852	0.0131006	0.0200138	0.781033
Maize	Zm00001eb168190_P001	PF08378	PF00089	PF01852	0.00855036	0.0115247	0.874546
Maize	Zm00001eb321860_P001	PF00246	PF00112	PF00754	0.0365171	0.0626697	0.240339
Maize	Zm00001eb019840_P001	PF00909	PF01699	PF00892	0.125567	0.243698	0.295535
Maize	Zm00001eb132030_P001	PF00125	PF00382	PF05703	0.0327755	0.214904	0.437619
Maize	Zm00001eb398080_P001	PF03732	PF01417	PF00076	0.0413871	0.0670141	0.0876287
Maize	Zm00001eb319950_P001	PF00578	PF00462	PF00085	0.00765258	0.108878	0.873274
Maize	Zm00001eb334480_P002	PF00564	PF04059	PF00076	0.002839	0.00684616	0.970433
Maize	Zm00001eb334480_P001	PF09405	PF05182	PF00076	0.00459915	0.00585304	0.965216
Maize	Zm00001eb326980_P001	PF04893	PF00892	PF01699	0.121712	0.13351	0.294828
Maize	Zm00001eb308420_P004	PF00160	PF04059	PF00076	0.00207425	0.0269	0.964324
Maize	Zm00001eb308420_P001	PF03467	PF04059	PF00076	0.00131623	0.0184501	0.9761
Maize	Zm00001eb308420_P002	PF03467	PF04059	PF00076	0.00161456	0.0120077	0.980657
Maize	Zm00001eb308420_P005	PF00160	PF04059	PF00076	0.00113342	0.0154101	0.978402
Maize	Zm00001eb308420_P003	PF00160	PF04059	PF00076	0.00238018	0.0420231	0.948597
Maize	Zm00001eb355500_P001	PF00080	PF00082	PF00089	0.126924	0.153229	0.207593
Maize	Zm00001eb107130_P001	PF01494	PF07228	PF00481	0.000100412	0.146668	0.852943
Maize	Zm00001eb107130_P002	PF01494	PF07228	PF00481	3.57939e-05	0.178463	0.821372
Maize	Zm00001eb267620_P002	PF00069	PF10172	PF05678	0.0739242	0.0777128	0.418617
Maize	Zm00001eb267620_P001	PF00089	PF05678	PF00234	0.0592134	0.0661086	0.104285
Maize	Zm00001eb107720_P002	PF01636	PF00728	PF13320	0.00181539	0.0184359	0.967902
Maize	Zm00001eb107720_P001	PF01636	PF00728	PF13320	0.00247127	0.0216266	0.96044
Maize	Zm00001eb107720_P003	PF12215	PF00728	PF13320	0.00129974	0.00501686	0.986745
Maize	Zm00001eb087460_P001	PF01764	PF04864	PF01975	0.0653009	0.0834391	0.104611
Maize	Zm00001eb087460_P002	PF00732	PF01205	PF01764	0.0499487	0.0568545	0.0855378
Maize	Zm00001eb078850_P001	PF00097	PF13639	PF01485	0.004432	0.010535	0.983526
Maize	Zm00001eb078850_P003	PF13639	PF00097	PF01485	0.0601339	0.074382	0.844422
Maize	Zm00001eb078850_P002	PF13639	PF00097	PF01485	0.0746365	0.115913	0.780436
Maize	Zm00001eb057350_P003	PF00266	PF00588	PF00582	5.20181e-06	9.83016e-06	0.99993
Maize	Zm00001eb057350_P001	PF00588	PF02887	PF00582	3.45152e-06	3.90138e-06	0.999978
Maize	Zm00001eb057350_P006	PF00590	PF00588	PF00582	6.34577e-06	6.9225e-06	0.99995
Maize	Zm00001eb057350_P004	PF00266	PF00588	PF00582	5.20181e-06	9.83016e-06	0.99993
Maize	Zm00001eb057350_P002	PF00999	PF00588	PF00582	1.79247e-06	3.93524e-06	0.999979
Maize	Zm00001eb057350_P005	PF00590	PF00588	PF00582	6.34577e-06	6.9225e-06	0.99995
Maize	Zm00001eb334280_P001	PF00622	PF00168	PF11926	0.000790617	0.0595917	0.937805
Maize	Zm00001eb305770_P001	PF13947	PF04043	PF00024	0.123943	0.141	0.171285
Maize	Zm00001eb279790_P003	PF17172	PF13417	PF13409	0.00629836	0.0351932	0.958383
Maize	Zm00001eb279790_P002	PF17172	PF13417	PF13409	0.00365405	0.0203563	0.975937
Maize	Zm00001eb279790_P001	PF17172	PF13417	PF13409	0.00629836	0.0351932	0.958383
Maize	Zm00001eb087670_P001	PF14634	PF00097	PF13639	0.01177	0.186997	0.764321
Maize	Zm00001eb087670_P002	PF14634	PF00097	PF13639	0.00509164	0.216587	0.760412
Maize	Zm00001eb089260_P001	PF12171	PF13019	PF12656	0.0387161	0.120763	0.805547
Maize	Zm00001eb433030_P004	PF00808	PF16987	PF02201	0.019772	0.0350835	0.783894
Maize	Zm00001eb433030_P001	PF00076	PF00808	PF02037	0.0667635	0.0732698	0.175393
Maize	Zm00001eb433030_P003	PF00808	PF16987	PF02201	0.0310031	0.0884937	0.670704
Maize	Zm00001eb433030_P002	PF00808	PF16987	PF02201	0.0310031	0.0884937	0.670704
Maize	Zm00001eb402550_P001	PF12999	PF13441	PF03330	0.000226578	0.000304367	0.998856
Maize	Zm00001eb402550_P002	PF00472	PF00271	PF00011	0.0246082	0.0257485	0.0492736
Maize	Zm00001eb165550_P003	PF00346	PF01571	PF00144	0.0559129	0.0789017	0.201354
Maize	Zm00001eb165550_P004	PF00571	PF00027	PF01336	0.0672791	0.0833379	0.303714
Maize	Zm00001eb165550_P002	PF00027	PF00144	PF01336	0.0537037	0.0730457	0.108359
Maize	Zm00001eb165550_P001	PF00571	PF00027	PF01336	0.0672791	0.0833379	0.303714
Maize	Zm00001eb192350_P002	PF12697	PF00326	PF00561	0.0763637	0.333132	0.492005
Maize	Zm00001eb192350_P001	PF12697	PF00326	PF00561	0.0763637	0.333132	0.492005
Maize	Zm00001eb157200_P001	PF00464	PF01541	PF01625	0.0425069	0.0609087	0.117505
Maize	Zm00001eb202240_P001	PF05627	PF00188	PF00127	0.052653	0.07796	0.109212
Maize	Zm00001eb140430_P001	PF00890	PF01494	PF07992	0.212185	0.241706	0.364384
Maize	Zm00001eb085800_P001	PF00024	PF14368	PF00234	0.104309	0.123903	0.183594
Maize	Zm00001eb166590_P001	PF00234	PF02469	PF04043	0.049615	0.182648	0.516117
Maize	Zm00001eb072360_P001	PF00046	PF13867	PF02037	0.0508789	0.0633061	0.0892129
Maize	Zm00001eb072360_P003	PF10497	PF04641	PF12171	0.0583699	0.0753908	0.23568
Maize	Zm00001eb072360_P004	PF03107	PF04997	PF01844	0.0690852	0.0773375	0.131665
Maize	Zm00001eb072360_P002	PF03107	PF12999	PF12171	0.0732268	0.0779851	0.120584
Maize	Zm00001eb005890_P001	PF03171	PF07883	PF00190	0.0718321	0.168098	0.67413
Maize	Zm00001eb069390_P001	PF02854	PF10075	PF01399	0.000233007	0.000513113	0.998328
Maize	Zm00001eb069390_P002	PF02854	PF10075	PF01399	0.000233007	0.000513113	0.998328
Maize	Zm00001eb359290_P001	PF00234	PF12999	PF07884	0.0855931	0.164989	0.206235
Maize	Zm00001eb322890_P001	PF13962	PF02453	PF00690	0.0352876	0.0363676	0.0383442
Maize	Zm00001eb317550_P001	PF00631	PF00010	PF05047	0.0736068	0.180032	0.352564
Maize	Zm00001eb253400_P001	PF00046	PF05678	PF13891	0.0511632	0.0840308	0.0988329
Maize	Zm00001eb078430_P001	PF00581	PF00856	PF04266	0.0703936	0.077922	0.137831
Maize	Zm00001eb290710_P001	PF00892	PF06943	PF07884	0.0276462	0.0342577	0.13171
Maize	Zm00001eb113130_P001	PF13456	PF14833	PF00171	0.0446295	0.0456725	0.0717162
Maize	Zm00001eb311240_P001	PF01648	PF04782	PF02861	0.0553864	0.0622247	0.0646257
Maize	Zm00001eb172910_P001	PF00089	PF07714	PF00069	5.64683e-05	0.0218484	0.978061
Maize	Zm00001eb163640_P001	PF00294	PF00850	PF00481	0.041557	0.0908337	0.212542
Maize	Zm00001eb046600_P001	PF00188	PF01464	PF00182	0.0699242	0.0781954	0.36469
Maize	Zm00001eb206820_P001	PF03168	PF00144	PF02469	0.00388529	0.0103576	0.955421
Maize	Zm00001eb409540_P002	PF08628	PF02179	PF02845	0.09133	0.0931997	0.214694
Maize	Zm00001eb409540_P001	PF08628	PF02179	PF02845	0.09133	0.0931997	0.214694
Maize	Zm00001eb197570_P001	PF14368	PF04043	PF00234	0.232443	0.336126	0.356329
Maize	Zm00001eb351310_P001	PF01541	PF00685	PF00271	0.0485642	0.0936568	0.096632
Maize	Zm00001eb351310_P003	PF04784	PF00685	PF00657	0.0970809	0.162118	0.17507
Maize	Zm00001eb351310_P002	PF00657	PF00685	PF09258	0.0517843	0.0790816	0.095755
Maize	Zm00001eb048090_P002	PF13579	PF04413	PF00590	4.54325e-06	1.82864e-05	0.999963
Maize	Zm00001eb048090_P001	PF13579	PF04413	PF00590	4.54325e-06	1.82864e-05	0.999963
Maize	Zm00001eb048090_P003	PF13579	PF04413	PF00590	4.54325e-06	1.82864e-05	0.999963
Maize	Zm00001eb163680_P001	PF10276	PF00188	PF01844	0.0640234	0.117936	0.412286
Maize	Zm00001eb181460_P001	PF03024	PF06747	PF02320	0.0821131	0.113	0.297636
Maize	Zm00001eb000020_P002	PF00271	PF01466	PF00856	0.0440704	0.0662796	0.136813
Maize	Zm00001eb000020_P004	PF00383	PF00171	PF00035	0.0493035	0.0596819	0.131795
Maize	Zm00001eb000020_P003	PF01088	PF11566	PF01466	0.00318388	0.00933807	0.969316
Maize	Zm00001eb000020_P001	PF00271	PF01466	PF00856	0.0546665	0.0708181	0.112987
Maize	Zm00001eb298270_P001	PF00042	PF03070	PF00497	0.0713625	0.116276	0.464539
Maize	Zm00001eb023380_P001	PF13456	PF14244	PF12776	0.0626275	0.129802	0.142995
Maize	Zm00001eb442300_P001	PF10440	PF11789	PF02581	0.0686664	0.0975689	0.0977653
Maize	Zm00001eb172080_P001	PF00307	PF04869	PF01399	0.0436536	0.0527939	0.081016
Maize	Zm00001eb370780_P001	PF01476	PF00127	PF01471	0.0631675	0.0677467	0.106089
Maize	Zm00001eb135820_P001	PF00665	PF00271	PF12766	0.0455946	0.0468494	0.0750871
Maize	Zm00001eb413160_P001	PF08627	PF00892	PF03151	0.00221452	0.0611541	0.935354
Maize	Zm00001eb413160_P002	PF08627	PF00892	PF03151	0.0113352	0.112874	0.868009
Maize	Zm00001eb130260_P001	PF10545	PF12776	PF00249	0.000587409	0.00189982	0.997093
Maize	Zm00001eb130260_P002	PF10545	PF12776	PF00249	0.001037	0.00262249	0.995955
Maize	Zm00001eb360590_P004	PF00505	PF13178	PF03941	0.0756134	0.0878581	0.131149
Maize	Zm00001eb360590_P001	PF00505	PF13259	PF03941	0.0693426	0.09524	0.149281
Maize	Zm00001eb360590_P002	PF00505	PF13178	PF03941	0.0756134	0.0878581	0.131149
Maize	Zm00001eb360590_P005	PF01423	PF10252	PF04419	0.0559183	0.0683356	0.305603
Maize	Zm00001eb360590_P003	PF00505	PF13259	PF03941	0.0693426	0.09524	0.149281
Maize	Zm00001eb019480_P002	PF16363	PF01370	PF07993	0.106643	0.168948	0.409804
Maize	Zm00001eb019480_P001	PF04321	PF01370	PF07993	0.159549	0.266141	0.423561
Maize	Zm00001eb019480_P003	PF00481	PF01467	PF03061	0.0329009	0.0355606	0.0760631
Maize	Zm00001eb048000_P001	PF01738	PF00561	PF00326	0.0121706	0.0162399	0.956162
Maize	Zm00001eb145230_P003	PF00133	PF00665	PF07727	0.0560587	0.0772543	0.0895109
Maize	Zm00001eb145230_P002	PF13664	PF07885	PF06916	0.11531	0.124827	0.137902
Maize	Zm00001eb145230_P001	PF00133	PF07727	PF03061	0.0472107	0.0732165	0.0941933
Maize	Zm00001eb292780_P002	PF10469	PF00646	PF02861	0.0461627	0.0930419	0.105442
Maize	Zm00001eb292780_P001	PF10469	PF00646	PF02861	0.0644192	0.0881452	0.131625
Maize	Zm00001eb065030_P005	PF14634	PF00097	PF13639	0.143329	0.292595	0.298873
Maize	Zm00001eb065030_P004	PF13664	PF07885	PF00361	0.081949	0.09503	0.10277
Maize	Zm00001eb065030_P003	PF00689	PF13180	PF00168	0.0320898	0.0584707	0.191993
Maize	Zm00001eb065030_P002	PF00190	PF00622	PF00254	0.0522134	0.138792	0.217675
Maize	Zm00001eb065030_P001	PF01565	PF00190	PF00168	0.0390237	0.0458977	0.183407
Maize	Zm00001eb413800_P001	PF14380	PF13947	PF01095	0.013378	0.0421999	0.834053
Maize	Zm00001eb286530_P002	PF01464	PF00307	PF12776	0.0457016	0.0554019	0.0879982
Maize	Zm00001eb286530_P001	PF01464	PF00307	PF12776	0.0457016	0.0554019	0.0879982
Maize	Zm00001eb068300_P001	PF03629	PF01180	PF00497	0.070238	0.078545	0.0913949
Maize	Zm00001eb215930_P001	PF00307	PF00651	PF00059	0.047672	0.0615716	0.33774
Maize	Zm00001eb227150_P002	PF12215	PF13243	PF13249	0.0370371	0.0600083	0.855506
Maize	Zm00001eb227150_P001	PF03070	PF12215	PF13249	0.0276941	0.0979461	0.632923
Maize	Zm00001eb433820_P004	PF12894	PF00646	PF08662	0.0941058	0.154277	0.289587
Maize	Zm00001eb433820_P002	PF00646	PF12894	PF08662	0.0953611	0.262145	0.528772
Maize	Zm00001eb433820_P001	PF03478	PF00481	PF00646	0.060127	0.117682	0.142758
Maize	Zm00001eb433820_P003	PF00646	PF12894	PF08662	0.15889	0.247891	0.328603
Maize	Zm00001eb165520_P001	PF01565	PF08585	PF03061	0.0628157	0.0657615	0.0814272
Maize	Zm00001eb434840_P001	PF00076	PF00808	PF03847	0.0688576	0.278274	0.405916
Maize	Zm00001eb435340_P001	PF00909	PF01061	PF00999	0.114491	0.138359	0.258761
Maize	Zm00001eb125900_P001	PF04083	PF00326	PF00561	0.097237	0.24882	0.495699
Maize	Zm00001eb125900_P002	PF12697	PF00326	PF00561	0.0725529	0.257137	0.615817
Maize	Zm00001eb258130_P001	PF03033	PF00534	PF06925	0.00400549	0.00741444	0.984849
Maize	Zm00001eb263040_P001	PF05678	PF13881	PF00011	0.0397415	0.0535707	0.0858498
Maize	Zm00001eb230110_P001	PF01398	PF07714	PF00069	1.56139e-05	0.0105166	0.989448
Maize	Zm00001eb102230_P002	PF08790	PF07460	PF10453	0.0873251	0.0935894	0.0988863
Maize	Zm00001eb102230_P005	PF10159	PF05047	PF02229	0.0923995	0.14035	0.257811
Maize	Zm00001eb102230_P004	PF05047	PF10159	PF02229	0.0513593	0.150634	0.393537
Maize	Zm00001eb102230_P003	PF10159	PF05047	PF02229	0.0798067	0.134745	0.240318
Maize	Zm00001eb102230_P001	PF05047	PF10159	PF02229	0.09009	0.125754	0.223026
Maize	Zm00001eb415410_P002	PF00252	PF01928	PF00189	0.026059	0.0853541	0.715789
Maize	Zm00001eb415410_P001	PF00252	PF17903	PF00189	8.58324e-06	1.41743e-05	0.999945
Maize	Zm00001eb011880_P001	PF07883	PF01243	PF00011	2.87968e-06	8.01542e-06	0.99998
Maize	Zm00001eb318270_P001	PF01167	PF01823	PF01648	0.0435037	0.0753451	0.111901
Maize	Zm00001eb375810_P001	PF17780	PF00188	PF00112	1.30752e-05	2.64506e-05	0.999928
Maize	Zm00001eb270210_P001	PF15477	PF04774	PF08648	0.0415847	0.18555	0.354341
Maize	Zm00001eb076470_P001	PF00249	PF12776	PF10545	0.0736556	0.12048	0.284386
Maize	Zm00001eb430280_P001	PF00808	PF00042	PF00125	0.0788559	0.0813111	0.155526
Maize	Zm00001eb418340_P001	PF01094	PF01761	PF00571	0.0416051	0.0424254	0.0496146
Maize	Zm00001eb241070_P001	PF00098	PF13976	PF02721	0.0829425	0.17031	0.201017
Maize	Zm00001eb161270_P001	PF17874	PF13023	PF17177	0.00331362	0.00671696	0.973579
Maize	Zm00001eb435260_P001	PF01494	PF17135	PF13456	0.03532	0.0403072	0.507918
Maize	Zm00001eb339890_P001	PF00168	PF05057	PF01764	0.00348933	0.0171097	0.966325
Maize	Zm00001eb339890_P002	PF01734	PF05057	PF01764	0.0105431	0.0599163	0.905125
Maize	Zm00001eb023220_P001	PF12171	PF13259	PF00505	0.0520971	0.139119	0.18794
Maize	Zm00001eb407630_P001	PF00171	PF00754	PF00112	0.0494108	0.0538206	0.0679944
Maize	Zm00001eb421540_P001	PF01106	PF02906	PF00403	0.00107452	0.00115562	0.991272
Maize	Zm00001eb283120_P001	PF13656	PF00364	PF01883	0.0521725	0.0552483	0.056635
Maize	Zm00001eb283120_P002	PF13656	PF00364	PF01883	0.0521725	0.0552483	0.056635
Maize	Zm00001eb077050_P001	PF06803	PF00487	PF06916	0.0724385	0.0793791	0.100779
Maize	Zm00001eb287660_P001	PF10536	PF12937	PF00646	0.015029	0.209517	0.561534
Maize	Zm00001eb158740_P003	PF00326	PF07859	PF00135	0.0760723	0.33956	0.573672
Maize	Zm00001eb158740_P001	PF00326	PF07859	PF00135	0.0590963	0.253095	0.68044
Maize	Zm00001eb158740_P005	PF00326	PF07859	PF00135	0.0590963	0.253095	0.68044
Maize	Zm00001eb158740_P004	PF00326	PF07859	PF00135	0.0590963	0.253095	0.68044
Maize	Zm00001eb158740_P006	PF00326	PF07859	PF00135	0.0735747	0.243452	0.675366
Maize	Zm00001eb158740_P002	PF00326	PF07859	PF00135	0.0760723	0.33956	0.573672
Maize	Zm00001eb240460_P001	PF13579	PF04101	PF00534	0.181259	0.196971	0.297234
Maize	Zm00001eb115450_P001	PF01556	PF13180	PF00011	0.0460183	0.0574841	0.221351
Maize	Zm00001eb280040_P001	PF09325	PF07106	PF12325	0.113058	0.125375	0.285117
Maize	Zm00001eb230670_P001	PF07731	PF00082	PF01243	0.0415049	0.0462188	0.0600982
Maize	Zm00001eb088120_P001	PF01094	PF01408	PF04413	0.0782083	0.11042	0.41617
Maize	Zm00001eb194970_P004	PF08627	PF03151	PF00892	0.0860979	0.210756	0.564934
Maize	Zm00001eb194970_P002	PF08627	PF03151	PF00892	0.0895565	0.34217	0.527561
Maize	Zm00001eb194970_P003	PF08627	PF00892	PF03151	0.102796	0.267048	0.375631
Maize	Zm00001eb194970_P005	PF01699	PF03151	PF00892	0.138647	0.175222	0.345547
Maize	Zm00001eb194970_P001	PF00137	PF00999	PF00361	0.130298	0.135419	0.159539
Maize	Zm00001eb195720_P001	PF17874	PF00133	PF12796	0.0721321	0.0891044	0.153425
Maize	Zm00001eb215520_P001	PF13499	PF03372	PF13091	0.0558454	0.0763815	0.0858057
Maize	Zm00001eb228560_P001	PF00098	PF12171	PF01844	0.113219	0.273047	0.42943
Maize	Zm00001eb127210_P001	PF00156	PF00091	PF00291	4.37217e-06	7.35307e-06	0.999962
Maize	Zm00001eb127210_P002	PF00270	PF00107	PF00291	0.0367562	0.0727991	0.646413
Maize	Zm00001eb073960_P001	PF00248	PF13456	PF00031	0.0341022	0.0341941	0.0511273
Maize	Zm00001eb177440_P002	PF02845	PF02469	PF04755	0.101555	0.104567	0.105392
Maize	Zm00001eb177440_P001	PF02469	PF02845	PF04755	0.10231	0.103174	0.191506
Maize	Zm00001eb177440_P003	PF04755	PF00085	PF02845	0.0647477	0.0666288	0.11963
Maize	Zm00001eb392520_P001	PF00685	PF00487	PF01553	0.0390449	0.104368	0.185314
Maize	Zm00001eb084340_P001	PF02893	PF00169	PF00635	0.0787566	0.10703	0.122494
Maize	Zm00001eb161190_P001	PF07889	PF02854	PF07766	0.0683657	0.176815	0.18607
Maize	Zm00001eb113880_P001	PF13639	PF04536	PF12796	0.0856499	0.139437	0.481697
Maize	Zm00001eb113880_P002	PF13968	PF04536	PF12796	0.0475872	0.114752	0.664529
Maize	Zm00001eb399410_P001	PF00443	PF04970	PF01844	0.0785105	0.0936286	0.138329
Maize	Zm00001eb257010_P002	PF04851	PF00270	PF00271	0.110657	0.309061	0.53062
Maize	Zm00001eb257010_P001	PF04851	PF00270	PF00271	0.110657	0.309061	0.53062
Maize	Zm00001eb130020_P001	PF10545	PF12776	PF00249	0.00355972	0.00400395	0.99117
Maize	Zm00001eb032630_P001	PF06839	PF03151	PF13962	0.0438089	0.0722243	0.0788523
Maize	Zm00001eb411100_P001	PF08241	PF02668	PF04572	0.0755356	0.0782641	0.145359
Maize	Zm00001eb411100_P003	PF04784	PF01261	PF08241	0.0802213	0.110223	0.182153
Maize	Zm00001eb411100_P002	PF04784	PF01261	PF08241	0.0862246	0.0969392	0.207407
Maize	Zm00001eb411100_P005	PF04784	PF01261	PF08241	0.0802213	0.110223	0.182153
Maize	Zm00001eb411100_P004	PF04784	PF01261	PF08241	0.105859	0.11059	0.117
Maize	Zm00001eb269770_P002	PF03031	PF02225	PF14360	0.036825	0.0376139	0.841901
Maize	Zm00001eb269770_P001	PF03031	PF02225	PF14360	0.036825	0.0376139	0.841901
Maize	Zm00001eb380690_P001	PF07106	PF17035	PF02179	0.0931318	0.0945547	0.147469
Maize	Zm00001eb380690_P002	PF07842	PF02179	PF17035	0.0471549	0.0815213	0.205393
Maize	Zm00001eb264030_P001	PF17032	PF13966	PF01844	0.021853	0.0221129	0.197525
Maize	Zm00001eb364930_P001	PF05617	PF14368	PF00234	0.00320609	0.450917	0.543666
Maize	Zm00001eb118090_P002	PF01088	PF00109	PF00141	0.000439869	0.000441638	0.995315
Maize	Zm00001eb118090_P001	PF03328	PF04043	PF00141	4.30506e-05	0.000356	0.999235
Maize	Zm00001eb322380_P001	PF03372	PF07714	PF00069	0.00692347	0.0249195	0.965106
Maize	Zm00001eb322380_P005	PF00169	PF00307	PF00644	0.0587589	0.0664043	0.352963
Maize	Zm00001eb322380_P002	PF03372	PF07714	PF00069	0.013599	0.0312468	0.953972
Maize	Zm00001eb322380_P004	PF03372	PF07714	PF00069	0.026047	0.0377042	0.926461
Maize	Zm00001eb322380_P003	PF01636	PF07714	PF00069	0.00387936	0.031608	0.96033
Maize	Zm00001eb297320_P002	PF03104	PF08596	PF03178	0.0068419	0.0161359	0.879277
Maize	Zm00001eb297320_P001	PF00567	PF08596	PF03178	0.00599288	0.0116916	0.921176
Maize	Zm00001eb297320_P004	PF00567	PF08596	PF03178	0.00992402	0.0111723	0.923632
Maize	Zm00001eb297320_P005	PF07774	PF00567	PF03178	0.00864409	0.011367	0.932024
Maize	Zm00001eb297320_P003	PF12894	PF08596	PF03178	0.00466991	0.0174904	0.901678
Maize	Zm00001eb092640_P001	PF12656	PF04774	PF05627	0.0872515	0.0988463	0.146223
Maize	Zm00001eb398720_P001	PF03372	PF02902	PF17942	0.0640183	0.0795386	0.0937247
Maize	Zm00001eb337700_P001	PF02892	PF12756	PF12171	0.0136277	0.104224	0.869885
Maize	Zm00001eb358730_P001	PF04419	PF00690	PF06916	0.0391139	0.0572115	0.209729
Maize	Zm00001eb239250_P001	PF12708	PF00089	PF01095	0.0953703	0.159589	0.25268
Maize	Zm00001eb023730_P001	PF03024	PF13947	PF14380	0.0154349	0.385461	0.571584
Maize	Zm00001eb360530_P001	PF01485	PF00097	PF13639	0.163905	0.295864	0.371533
Maize	Zm00001eb360530_P003	PF01485	PF00097	PF13639	0.163905	0.295864	0.371533
Maize	Zm00001eb360530_P002	PF01485	PF00097	PF13639	0.163905	0.295864	0.371533
Maize	Zm00001eb168510_P001	PF02338	PF09468	PF02902	0.0394167	0.0877459	0.252409
Maize	Zm00001eb168510_P002	PF02338	PF09468	PF02902	0.0394167	0.0877459	0.252409
Maize	Zm00001eb042890_P001	PF00646	PF17874	PF00931	0.00809607	0.0544111	0.89123
Maize	Zm00001eb367130_P001	PF05699	PF07647	PF02893	0.0284257	0.0318972	0.121628
Maize	Zm00001eb239910_P001	PF01636	PF07714	PF00069	2.62373e-05	0.049645	0.950245
Maize	Zm00001eb207940_P002	PF00646	PF00168	PF00536	0.0914212	0.131445	0.176882
Maize	Zm00001eb207940_P001	PF00646	PF00168	PF00536	0.0914212	0.131445	0.176882
Maize	Zm00001eb154610_P003	PF00561	PF05057	PF01764	0.0248305	0.0378955	0.865226
Maize	Zm00001eb154610_P004	PF00561	PF05057	PF01764	0.0248305	0.0378955	0.865226
Maize	Zm00001eb154610_P001	PF00561	PF05057	PF01764	0.0248305	0.0378955	0.865226
Maize	Zm00001eb154610_P002	PF00561	PF05057	PF01764	0.0248306	0.0378955	0.865225
Maize	Zm00001eb057210_P003	PF04851	PF00270	PF00271	0.0329595	0.100543	0.769492
Maize	Zm00001eb057210_P002	PF04851	PF00270	PF00271	0.0502408	0.155263	0.683345
Maize	Zm00001eb057210_P001	PF04851	PF00270	PF00271	0.0498081	0.189106	0.650752
Maize	Zm00001eb210920_P001	PF01061	PF00361	PF13664	0.061805	0.0695694	0.542689
Maize	Zm00001eb406470_P001	PF07716	PF00631	PF00010	0.0381314	0.0393011	0.760263
Maize	Zm00001eb185070_P001	PF00249	PF07714	PF00069	2.24732e-05	0.0116568	0.988274
Maize	Zm00001eb288460_P001	PF00481	PF00271	PF00156	0.0792383	0.104244	0.138922
Maize	Zm00001eb427180_P001	PF00010	PF00808	PF00125	0.000361447	0.000436185	0.998793
Maize	Zm00001eb211720_P003	PF03914	PF05057	PF13716	0.0424092	0.0494162	0.0894628
Maize	Zm00001eb211720_P002	PF01553	PF03171	PF00650	0.0234685	0.038954	0.882243
Maize	Zm00001eb211720_P004	PF01553	PF03171	PF00650	0.0234685	0.038954	0.882243
Maize	Zm00001eb211720_P001	PF02893	PF01553	PF00650	0.00053708	0.00360255	0.992964
Maize	Zm00001eb227730_P001	PF00651	PF10075	PF00134	0.00088394	0.00101064	0.997528
Maize	Zm00001eb227730_P002	PF10075	PF00651	PF00134	0.000905153	0.00104088	0.997451
Maize	Zm00001eb227730_P003	PF00651	PF10075	PF00134	0.00088394	0.00101064	0.997528
Maize	Zm00001eb324690_P001	PF00125	PF07714	PF00069	9.66142e-06	0.010632	0.989342
Maize	Zm00001eb145640_P001	PF00505	PF12656	PF08729	0.00184469	0.00981464	0.977644
Maize	Zm00001eb005680_P001	PF04828	PF17032	PF07884	0.0720371	0.122467	0.187204
Maize	Zm00001eb217710_P001	PF01636	PF07714	PF00069	2.60328e-05	0.0130927	0.986874
Maize	Zm00001eb116280_P003	PF00571	PF01399	PF12717	0.0109747	0.0158993	0.864982
Maize	Zm00001eb116280_P002	PF12719	PF12755	PF12717	0.01792	0.0324507	0.909032
Maize	Zm00001eb116280_P001	PF12719	PF12755	PF12717	0.0127776	0.0328836	0.9275
Maize	Zm00001eb044020_P003	PF12937	PF00646	PF00931	0.0180866	0.12427	0.595245
Maize	Zm00001eb044020_P001	PF17874	PF00646	PF00931	0.00522977	0.0118419	0.950818
Maize	Zm00001eb044020_P002	PF17874	PF00646	PF00931	0.0108527	0.0165134	0.949169
Maize	Zm00001eb151150_P001	PF00004	PF17874	PF00931	0.00781991	0.0213645	0.956655
Maize	Zm00001eb151150_P002	PF00004	PF17874	PF00931	0.00781991	0.0213645	0.956655
Maize	Zm00001eb256550_P001	PF07728	PF08542	PF00004	0.0209283	0.0383637	0.891958
Maize	Zm00001eb248300_P001	PF00635	PF00169	PF02893	0.000973671	0.0120942	0.985761
Maize	Zm00001eb150050_P001	PF02140	PF14380	PF13947	0.104994	0.127218	0.549588
Maize	Zm00001eb428120_P001	PF00441	PF00171	PF02861	0.0446005	0.047303	0.0629403
Maize	Zm00001eb019330_P003	PF05175	PF10672	PF01170	0.00748825	0.0447012	0.931003
Maize	Zm00001eb019330_P001	PF00102	PF08241	PF01170	0.0741683	0.0896177	0.547404
Maize	Zm00001eb019330_P004	PF05175	PF10672	PF01170	0.0121979	0.0234852	0.944354
Maize	Zm00001eb019330_P002	PF07145	PF00059	PF00024	0.0557768	0.0865032	0.125394
Maize	Zm00001eb418900_P001	PF00210	PF01814	PF00808	0.036873	0.0381277	0.0415274
Maize	Zm00001eb425860_P001	PF00307	PF12031	PF02854	0.0266342	0.0490028	0.889161
Maize	Zm00001eb425860_P002	PF00307	PF12031	PF02854	0.0086791	0.0557571	0.908731
Maize	Zm00001eb247070_P001	PF05678	PF13259	PF05047	0.0878666	0.113863	0.145307
Maize	Zm00001eb416200_P002	PF13456	PF04601	PF13966	0.0457174	0.0507028	0.0568937
Maize	Zm00001eb416200_P001	PF04601	PF08378	PF09348	0.0402275	0.0488366	0.0629675
Maize	Zm00001eb400490_P002	PF00615	PF11838	PF05843	0.0818676	0.0919936	0.380057
Maize	Zm00001eb400490_P001	PF00615	PF04446	PF05843	0.0824219	0.0982773	0.321074
Maize	Zm00001eb400490_P004	PF00888	PF00134	PF05843	0.000979258	0.00105165	0.995436
Maize	Zm00001eb400490_P005	PF00888	PF00134	PF05843	0.000979258	0.00105165	0.995436
Maize	Zm00001eb400490_P003	PF00615	PF11838	PF05843	0.0818676	0.0919936	0.380057
Maize	Zm00001eb212900_P003	PF13178	PF04696	PF07557	0.039425	0.296258	0.381906
Maize	Zm00001eb212900_P002	PF13178	PF04696	PF07557	0.0393796	0.297247	0.381396
Maize	Zm00001eb212900_P001	PF13178	PF04696	PF07557	0.0394598	0.297457	0.381471
Maize	Zm00001eb298000_P001	PF09346	PF05641	PF01636	0.0541466	0.0610281	0.55712
Maize	Zm00001eb089340_P001	PF13243	PF07993	PF00144	0.0505681	0.0694462	0.0795529
Maize	Zm00001eb199140_P002	PF00097	PF11331	PF12171	0.102935	0.120241	0.126603
Maize	Zm00001eb199140_P003	PF00855	PF00098	PF15628	0.0529069	0.0560114	0.069566
Maize	Zm00001eb199140_P001	PF12171	PF00097	PF13639	0.114686	0.154963	0.15946
Maize	Zm00001eb128010_P003	PF17177	PF10075	PF17874	0.181301	0.229988	0.231998
Maize	Zm00001eb128010_P001	PF00651	PF12931	PF17177	0.161032	0.164064	0.169208
Maize	Zm00001eb128010_P002	PF10075	PF17177	PF17874	0.119792	0.145113	0.424383
Maize	Zm00001eb125670_P002	PF00622	PF05641	PF00168	0.0681949	0.137925	0.142845
Maize	Zm00001eb125670_P001	PF00622	PF05641	PF00168	0.0681949	0.137925	0.142845
Maize	Zm00001eb204310_P001	PF00168	PF11976	PF05678	0.0300947	0.0497766	0.0595272
Maize	Zm00001eb343050_P001	PF00011	PF00168	PF17766	0.0252718	0.0393784	0.0513599
Maize	Zm00001eb246650_P002	PF11789	PF06391	PF12171	0.0111786	0.0130796	0.89866
Maize	Zm00001eb246650_P004	PF08492	PF00076	PF12171	0.00784752	0.0091922	0.915303
Maize	Zm00001eb246650_P001	PF06391	PF00403	PF12171	0.0585655	0.2142	0.465395
Maize	Zm00001eb246650_P003	PF00462	PF00403	PF12171	0.0398986	0.186448	0.581127
Maize	Zm00001eb246650_P005	PF08492	PF00076	PF12171	0.00874191	0.00917421	0.900393
Maize	Zm00001eb259310_P005	PF01553	PF05686	PF00685	0.0601677	0.111227	0.193442
Maize	Zm00001eb259310_P002	PF09734	PF00685	PF01553	0.044257	0.0772903	0.105782
Maize	Zm00001eb259310_P003	PF03441	PF10536	PF09734	0.0368651	0.0862667	0.161186
Maize	Zm00001eb259310_P004	PF05686	PF01553	PF00685	0.0593569	0.0932097	0.136619
Maize	Zm00001eb259310_P001	PF03441	PF10536	PF09734	0.0368651	0.0862667	0.161186
Maize	Zm00001eb240610_P001	PF00576	PF08240	PF04828	0.0774241	0.0971566	0.15561
Maize	Zm00001eb000820_P001	PF07647	PF03732	PF00249	0.0469243	0.100539	0.182117
Maize	Zm00001eb000820_P002	PF01823	PF00646	PF03732	0.0819997	0.137608	0.141429
Maize	Zm00001eb000820_P004	PF00249	PF00646	PF03732	0.0679735	0.072505	0.173622
Maize	Zm00001eb000820_P003	PF01823	PF00646	PF03732	0.0819997	0.137608	0.141429
Maize	Zm00001eb175880_P001	PF10213	PF04280	PF09350	0.00262046	0.00398127	0.9783
Maize	Zm00001eb171630_P001	PF09430	PF07883	PF00190	0.000196821	0.0422497	0.957329
Maize	Zm00001eb114890_P001	PF11566	PF01088	PF01466	0.000653428	0.000816745	0.997183
Maize	Zm00001eb202270_P001	PF00891	PF12796	PF00651	0.0452725	0.0473403	0.181826
Maize	Zm00001eb170740_P001	PF03372	PF00728	PF04572	0.0580703	0.0742942	0.38634
Maize	Zm00001eb170740_P002	PF02902	PF07727	PF00665	0.0728933	0.143405	0.264533
Maize	Zm00001eb385710_P001	PF00171	PF00141	PF05699	0.0393387	0.0406926	0.0788635
Maize	Zm00001eb281560_P001	PF05678	PF00135	PF00141	0.0428928	0.0431904	0.0738741
Maize	Zm00001eb406050_P002	PF00615	PF00169	PF00787	0.0558514	0.134367	0.299411
Maize	Zm00001eb406050_P001	PF00168	PF00169	PF10075	0.098987	0.141393	0.193808
Maize	Zm00001eb378810_P001	PF00004	PF00651	PF00857	0.0564611	0.0717575	0.10555
Maize	Zm00001eb110530_P002	PF01113	PF02737	PF07889	0.0764884	0.112786	0.218849
Maize	Zm00001eb110530_P001	PF01113	PF02737	PF07889	0.0764884	0.112786	0.218849
Maize	Zm00001eb110530_P003	PF00005	PF00097	PF13639	0.0840291	0.417768	0.421295
Maize	Zm00001eb170360_P002	PF07842	PF04782	PF12325	0.101498	0.207091	0.309797
Maize	Zm00001eb170360_P003	PF04782	PF07842	PF12325	0.121179	0.151425	0.271091
Maize	Zm00001eb170360_P001	PF07842	PF04782	PF12325	0.133919	0.200527	0.249254
Maize	Zm00001eb089950_P001	PF06424	PF04774	PF12656	0.0712694	0.120646	0.202138
Maize	Zm00001eb086310_P001	PF00182	PF01464	PF00188	0.00310399	0.00444795	0.991785
Maize	Zm00001eb129440_P002	PF03171	PF07883	PF00190	3.49492e-05	0.0600836	0.9398
Maize	Zm00001eb129440_P003	PF03171	PF07883	PF00190	3.49492e-05	0.0600836	0.9398
Maize	Zm00001eb129440_P001	PF03171	PF07883	PF00190	3.49493e-05	0.0600837	0.9398
Maize	Zm00001eb082030_P001	PF01435	PF01743	PF00027	0.0525374	0.0570954	0.0666916
Maize	Zm00001eb051530_P001	PF05699	PF03798	PF00134	0.0443576	0.0731587	0.140784
Maize	Zm00001eb114530_P001	PF00170	PF14215	PF00010	0.00638887	0.109639	0.846711
Maize	Zm00001eb041840_P002	PF00443	PF00856	PF00651	0.071107	0.119541	0.263667
Maize	Zm00001eb224170_P001	PF12717	PF12348	PF07814	0.165253	0.19855	0.231949
Maize	Zm00001eb166360_P001	PF00361	PF05699	PF00134	0.0405435	0.188656	0.191359
Maize	Zm00001eb426920_P004	PF00361	PF00892	PF00909	0.10318	0.136013	0.271991
Maize	Zm00001eb426920_P001	PF03151	PF00909	PF00999	0.0954496	0.107329	0.156177
Maize	Zm00001eb426920_P003	PF00361	PF00909	PF07786	0.0787169	0.201528	0.399096
Maize	Zm00001eb426920_P002	PF00361	PF00909	PF07786	0.0916338	0.157348	0.498508
Maize	Zm00001eb426920_P005	PF00892	PF00361	PF00909	0.104624	0.218339	0.335819
Maize	Zm00001eb367420_P001	PF04695	PF00134	PF13178	0.0697742	0.123725	0.190332
Maize	Zm00001eb249350_P002	PF01336	PF16486	PF02926	0.0504761	0.0715693	0.09301
Maize	Zm00001eb249350_P005	PF17903	PF00327	PF04719	0.081704	0.0954963	0.121079
Maize	Zm00001eb249350_P001	PF00270	PF16486	PF00198	0.0542516	0.068863	0.127644
Maize	Zm00001eb249350_P003	PF04073	PF07727	PF00271	0.0640952	0.0722845	0.118808
Maize	Zm00001eb249350_P004	PF16035	PF01509	PF02926	0.038059	0.0574661	0.148053
Maize	Zm00001eb249350_P006	PF02201	PF16486	PF00198	0.0444812	0.0451984	0.0627908
Maize	Zm00001eb369700_P001	PF00127	PF03330	PF02298	0.000941014	0.000979443	0.996661
Maize	Zm00001eb122390_P001	PF04828	PF01844	PF10276	0.0548526	0.107727	0.21669
Maize	Zm00001eb435880_P001	PF14237	PF00188	PF01471	0.024224	0.0263	0.0830886
Maize	Zm00001eb123060_P006	PF00464	PF13462	PF01425	0.0535402	0.0738205	0.367404
Maize	Zm00001eb123060_P002	PF00464	PF13462	PF01425	0.0535402	0.0738205	0.367404
Maize	Zm00001eb123060_P003	PF00464	PF13462	PF01425	0.0535402	0.0738205	0.367404
Maize	Zm00001eb123060_P005	PF00464	PF13462	PF01425	0.0535402	0.0738205	0.367404
Maize	Zm00001eb123060_P001	PF00464	PF13462	PF01425	0.0535402	0.0738205	0.367404
Maize	Zm00001eb123060_P004	PF00464	PF13462	PF01425	0.0535402	0.0738205	0.367404
Maize	Zm00001eb111320_P001	PF01926	PF02463	PF00005	0.112945	0.281667	0.393087
Maize	Zm00001eb135020_P001	PF00076	PF00462	PF16740	0.0520665	0.0555954	0.0754509
Maize	Zm00001eb001710_P001	PF00646	PF12894	PF08662	0.0313681	0.237336	0.697524
Maize	Zm00001eb366490_P001	PF08450	PF00251	PF03088	0.0052	0.0080737	0.973777
Maize	Zm00001eb098270_P001	PF00080	PF02845	PF00498	0.0338599	0.0362417	0.0852776
Maize	Zm00001eb015910_P004	PF02463	PF00485	PF00005	0.00145039	0.00165992	0.994451
Maize	Zm00001eb015910_P003	PF00004	PF02463	PF00005	0.000818444	0.00729824	0.989688
Maize	Zm00001eb015910_P001	PF00004	PF02463	PF00005	0.000818444	0.00729824	0.989688
Maize	Zm00001eb015910_P002	PF00004	PF02463	PF00005	0.000538369	0.00656754	0.991783
Maize	Zm00001eb015910_P005	PF01926	PF02463	PF00005	0.00118517	0.0032087	0.993022
Maize	Zm00001eb124990_P001	PF12937	PF00004	PF00646	0.0641308	0.155253	0.275881
Maize	Zm00001eb124990_P002	PF05699	PF00134	PF00646	0.102818	0.123223	0.20245
Maize	Zm00001eb125560_P002	PF01485	PF03024	PF00024	0.0718678	0.0980257	0.152292
Maize	Zm00001eb125560_P001	PF00024	PF13639	PF01485	0.0689066	0.0832546	0.100674
Maize	Zm00001eb125560_P004	PF00097	PF01485	PF13639	0.110059	0.202059	0.205223
Maize	Zm00001eb125560_P003	PF13639	PF01485	PF01844	0.116068	0.272349	0.290482
Maize	Zm00001eb247950_P001	PF00707	PF01765	PF10213	0.088904	0.127062	0.134746
Maize	Zm00001eb369040_P001	PF00754	PF07731	PF07732	0.0737353	0.164581	0.325734
Maize	Zm00001eb250270_P001	PF00347	PF04755	PF00168	0.0513663	0.0856264	0.121372
Maize	Zm00001eb379480_P001	PF13426	PF01336	PF00550	0.0307179	0.0433478	0.575572
Maize	Zm00001eb246730_P001	PF12171	PF12907	PF04419	0.00215931	0.0315102	0.960536
Maize	Zm00001eb112190_P001	PF13878	PF03167	PF14111	0.0352034	0.0448553	0.0467933
Maize	Zm00001eb112190_P002	PF13878	PF14111	PF03167	0.0429595	0.0438382	0.0546478
Maize	Zm00001eb224490_P001	PF00462	PF02823	PF02941	0.0979245	0.113294	0.15513
Maize	Zm00001eb100810_P001	PF03941	PF12325	PF08172	0.041055	0.196688	0.332631
Maize	Zm00001eb081270_P002	PF15511	PF00808	PF00125	0.000250644	0.000293425	0.99921
Maize	Zm00001eb081270_P001	PF15511	PF00808	PF00125	0.000250644	0.000293425	0.99921
Maize	Zm00001eb081270_P003	PF15511	PF00808	PF00125	0.000250644	0.000293425	0.99921
Maize	Zm00001eb311210_P001	PF01553	PF01435	PF08510	0.0521819	0.129687	0.14177
Maize	Zm00001eb207120_P001	PF13664	PF06916	PF09835	0.0101623	0.03794	0.914604
Maize	Zm00001eb207120_P002	PF01699	PF00916	PF09835	0.0885067	0.100578	0.428302
Maize	Zm00001eb007460_P001	PF00188	PF00141	PF00135	0.0402107	0.0595014	0.0828423
Maize	Zm00001eb273970_P001	PF01699	PF04893	PF00892	0.078396	0.224606	0.248202
Maize	Zm00001eb429950_P001	PF13023	PF13328	PF17177	0.0421002	0.142272	0.550583
Maize	Zm00001eb228190_P001	PF00141	PF07228	PF00481	2.66508e-05	0.0173549	0.982549
Maize	Zm00001eb228190_P003	PF00141	PF07228	PF00481	2.66508e-05	0.0173549	0.982549
Maize	Zm00001eb228190_P002	PF00107	PF07228	PF00481	0.000107203	0.0480003	0.951204
Maize	Zm00001eb282730_P001	PF14634	PF00097	PF13639	0.0769602	0.323958	0.577906
Maize	Zm00001eb282730_P002	PF14634	PF00097	PF13639	0.0775614	0.338345	0.565629
Maize	Zm00001eb316320_P001	PF01553	PF02357	PF00578	0.0518783	0.121928	0.182998
Maize	Zm00001eb182000_P001	PF00644	PF00254	PF00622	0.000885394	0.0023598	0.995767
Maize	Zm00001eb182000_P003	PF00644	PF00254	PF00622	0.000885394	0.0023598	0.995767
Maize	Zm00001eb182000_P004	PF00644	PF00254	PF00622	0.000885394	0.0023598	0.995767
Maize	Zm00001eb182000_P002	PF00644	PF00254	PF00622	0.000885394	0.0023598	0.995767
Maize	Zm00001eb355420_P001	PF00403	PF00689	PF00690	0.0264383	0.233229	0.690767
Maize	Zm00001eb355420_P002	PF16212	PF00690	PF00689	0.0567347	0.131228	0.806781
Maize	Zm00001eb332630_P002	PF08698	PF00505	PF04419	0.078868	0.127678	0.167793
Maize	Zm00001eb332630_P001	PF04419	PF01778	PF00472	0.0761138	0.234677	0.23932
Maize	Zm00001eb100010_P002	PF02338	PF00651	PF11789	0.0758928	0.0980125	0.197543
Maize	Zm00001eb100010_P001	PF11789	PF03987	PF00651	0.0604248	0.169658	0.321908
Maize	Zm00001eb405820_P002	PF12169	PF00817	PF00651	0.0131785	0.12465	0.787015
Maize	Zm00001eb405820_P001	PF08492	PF00817	PF00651	0.0273544	0.157399	0.69239
Maize	Zm00001eb407780_P004	PF01926	PF16575	PF17863	0.00529725	0.00943608	0.978143
Maize	Zm00001eb407780_P001	PF00006	PF00270	PF17863	0.000202605	0.000315199	0.998721
Maize	Zm00001eb407780_P003	PF00006	PF00270	PF17863	0.000202605	0.000315199	0.998721
Maize	Zm00001eb407780_P005	PF16575	PF00006	PF17863	0.000539311	0.0020406	0.994587
Maize	Zm00001eb407780_P002	PF00006	PF00270	PF17863	0.000202605	0.000315199	0.998721
Maize	Zm00001eb241910_P002	PF08511	PF14372	PF05699	0.0876689	0.0916839	0.185822
Maize	Zm00001eb241910_P001	PF08511	PF13968	PF05699	0.101985	0.120605	0.134669
Maize	Zm00001eb398500_P001	PF12776	PF00188	PF00249	0.0576363	0.0968651	0.501211
Maize	Zm00001eb141720_P001	PF00188	PF01464	PF00252	0.0482271	0.05702	0.148711
Maize	Zm00001eb040910_P001	PF13259	PF00631	PF05678	0.0602641	0.0726768	0.0874109
Maize	Zm00001eb174050_P001	PF00536	PF03732	PF00307	0.035472	0.0385522	0.395475
Maize	Zm00001eb380200_P001	PF02714	PF13968	PF01435	0.0580461	0.0711097	0.298846
Maize	Zm00001eb380200_P002	PF02845	PF13968	PF01435	0.0484412	0.0530802	0.479742
Maize	Zm00001eb404320_P002	PF01088	PF00307	PF01466	0.00476014	0.0204583	0.960881
Maize	Zm00001eb404320_P001	PF01088	PF00307	PF01466	0.00881428	0.0173536	0.944941
Maize	Zm00001eb425940_P001	PF05703	PF13178	PF00472	0.0848775	0.110824	0.224795
Maize	Zm00001eb084010_P001	PF00294	PF00291	PF02800	0.0736974	0.136972	0.235726
Maize	Zm00001eb183960_P001	PF01301	PF00171	PF00076	0.0575509	0.10337	0.132707
Maize	Zm00001eb234610_P001	PF04572	PF05686	PF03016	0.00742535	0.0730896	0.905278
Maize	Zm00001eb234610_P002	PF04572	PF05686	PF03016	0.00754588	0.0621267	0.916598
Maize	Zm00001eb137010_P001	PF12656	PF01417	PF05066	0.074565	0.0902822	0.0942243
Maize	Zm00001eb021160_P001	PF07524	PF02845	PF14364	0.0328106	0.0491559	0.0800448
Maize	Zm00001eb426390_P001	PF00542	PF00550	PF00180	0.0615738	0.0969544	0.0989306
Maize	Zm00001eb359230_P001	PF07728	PF13086	PF00004	0.010498	0.012717	0.93213
Maize	Zm00001eb168640_P001	PF00291	PF00155	PF00266	0.00665993	0.0907874	0.874619
Maize	Zm00001eb239390_P001	PF00141	PF00107	PF04043	0.109145	0.171693	0.184495
Maize	Zm00001eb023300_P001	PF07145	PF00011	PF05678	0.042839	0.0521642	0.290265
Maize	Zm00001eb323550_P004	PF02854	PF12717	PF01399	0.0613207	0.0826376	0.455822
Maize	Zm00001eb323550_P005	PF02854	PF12717	PF01399	0.0613207	0.0826376	0.455822
Maize	Zm00001eb323550_P002	PF07707	PF01399	PF00651	0.00421729	0.00876352	0.949909
Maize	Zm00001eb323550_P003	PF02854	PF12717	PF01399	0.0613207	0.0826376	0.455822
Maize	Zm00001eb323550_P001	PF02854	PF12717	PF01399	0.0613207	0.0826376	0.455822
Maize	Zm00001eb315040_P002	PF01106	PF00089	PF00364	0.0427057	0.0715473	0.259591
Maize	Zm00001eb315040_P001	PF01106	PF00089	PF00364	0.0427057	0.0715473	0.259591
Maize	Zm00001eb397000_P001	PF00059	PF00149	PF14416	0.000120422	0.000164426	0.999155
Maize	Zm00001eb207170_P001	PF00730	PF00382	PF00383	0.0229556	0.045747	0.679675
Maize	Zm00001eb057780_P005	PF00551	PF08806	PF05191	0.0771556	0.105765	0.125626
Maize	Zm00001eb057780_P001	PF00551	PF08806	PF05191	0.0771556	0.105765	0.125626
Maize	Zm00001eb057780_P004	PF13193	PF08806	PF05191	0.0521232	0.0741994	0.158745
Maize	Zm00001eb057780_P003	PF13193	PF02195	PF05191	0.0696014	0.102361	0.103954
Maize	Zm00001eb057780_P002	PF13193	PF08806	PF05191	0.0521232	0.0741994	0.158745
Maize	Zm00001eb224100_P001	PF03732	PF13867	PF00472	0.0241498	0.0255339	0.0517113
Maize	Zm00001eb286050_P001	PF01636	PF07714	PF00069	0.000117966	0.0281441	0.971569
Maize	Zm00001eb127690_P002	PF00137	PF13664	PF00690	0.0490462	0.0638982	0.0704049
Maize	Zm00001eb127690_P001	PF07885	PF00690	PF02453	0.0602123	0.0881708	0.0884764
Maize	Zm00001eb069020_P001	PF00027	PF07885	PF01435	0.0978714	0.104008	0.591044
Maize	Zm00001eb069020_P002	PF07885	PF01061	PF01435	0.114298	0.138941	0.332213
Maize	Zm00001eb436690_P001	PF14237	PF00188	PF01471	0.024224	0.0263	0.0830887
Maize	Zm00001eb276510_P001	PF00588	PF00501	PF00582	0.0423663	0.0438424	0.159984
Maize	Zm00001eb307890_P001	PF01794	PF00689	PF04893	0.0782842	0.0928521	0.116947
Maize	Zm00001eb375020_P001	PF01648	PF00472	PF01243	0.0471784	0.0488696	0.107223
Maize	Zm00001eb377490_P001	PF13456	PF00481	PF00501	0.0319589	0.0366218	0.0378246
Maize	Zm00001eb183380_P002	PF00168	PF11976	PF01423	0.0298003	0.102595	0.608116
Maize	Zm00001eb183380_P001	PF12624	PF01336	PF01423	0.00119917	0.00197932	0.990986
Maize	Zm00001eb051150_P003	PF10075	PF13023	PF01814	0.0272606	0.106485	0.678664
Maize	Zm00001eb051150_P002	PF01966	PF13023	PF01814	0.104222	0.136315	0.592239
Maize	Zm00001eb051150_P001	PF09325	PF13023	PF01814	0.0408586	0.0713096	0.61705
Maize	Zm00001eb346980_P001	PF02469	PF00026	PF01273	0.0356656	0.203981	0.521194
Maize	Zm00001eb198890_P001	PF01553	PF00060	PF00497	0.0567654	0.0769465	0.0808978
Maize	Zm00001eb403720_P001	PF14379	PF00046	PF05920	0.0158456	0.237156	0.692729
Maize	Zm00001eb403720_P002	PF02845	PF00010	PF07524	0.0377664	0.0430263	0.36132
Maize	Zm00001eb201040_P001	PF06916	PF01435	PF01794	0.0558545	0.141022	0.252466
Maize	Zm00001eb044560_P001	PF00646	PF12894	PF12657	0.0642068	0.0764526	0.462203
Maize	Zm00001eb044560_P002	PF00651	PF14655	PF12657	0.0396585	0.0596784	0.40843
Maize	Zm00001eb251780_P001	PF00188	PF12999	PF03330	0.000796096	0.0217428	0.976857
Maize	Zm00001eb036330_P001	PF01061	PF10260	PF02453	0.0479021	0.0570771	0.0586174
Maize	Zm00001eb403450_P001	PF17177	PF01399	PF17874	0.0531732	0.213769	0.273228
Maize	Zm00001eb352950_P001	PF10419	PF04424	PF15612	0.0570142	0.114562	0.142479
Maize	Zm00001eb343950_P004	PF00294	PF00082	PF00026	0.0473587	0.0931843	0.698082
Maize	Zm00001eb343950_P002	PF00294	PF00082	PF00026	0.0269816	0.0367734	0.821981
Maize	Zm00001eb343950_P001	PF00294	PF00082	PF00026	0.0269816	0.0367734	0.821981
Maize	Zm00001eb343950_P003	PF00294	PF00082	PF00026	0.0269816	0.0367734	0.821981
Maize	Zm00001eb267840_P001	PF00089	PF00059	PF00622	0.0626372	0.0970416	0.102023
Maize	Zm00001eb124100_P001	PF00892	PF00361	PF00909	0.105275	0.174632	0.179498
Maize	Zm00001eb004360_P001	PF00169	PF12896	PF08718	0.0600722	0.0745903	0.0787711
Maize	Zm00001eb117090_P001	PF07716	PF03962	PF00319	0.000103903	0.000309232	0.999195
Maize	Zm00001eb150630_P002	PF00294	PF00443	PF00288	6.50095e-05	8.37061e-05	0.999584
Maize	Zm00001eb150630_P001	PF00294	PF00443	PF00288	9.31135e-05	0.000100755	0.999398
Maize	Zm00001eb150630_P003	PF00291	PF00294	PF00288	0.000135765	0.000278349	0.998912
Maize	Zm00001eb404120_P002	PF00010	PF00125	PF15511	0.119563	0.14562	0.155854
Maize	Zm00001eb404120_P001	PF01814	PF10213	PF07985	0.0329687	0.1154	0.178919
Maize	Zm00001eb044540_P001	PF01466	PF01417	PF00307	0.00240154	0.00519129	0.986458
Maize	Zm00001eb044540_P002	PF03732	PF07647	PF00307	0.0165511	0.0200274	0.812774
Maize	Zm00001eb098750_P001	PF05699	PF07651	PF00134	0.057678	0.151466	0.248916
Maize	Zm00001eb140800_P001	PF00168	PF03478	PF00626	0.045122	0.0627989	0.0970432
Maize	Zm00001eb006110_P001	PF01243	PF00581	PF12766	0.0543706	0.209215	0.298534
Maize	Zm00001eb305260_P001	PF00657	PF00150	PF00704	0.000107321	0.000946316	0.998489
Maize	Zm00001eb275590_P001	PF03168	PF10502	PF01476	0.0873223	0.106113	0.122027
Maize	Zm00001eb356600_P001	PF17172	PF13417	PF13409	0.00189104	0.038094	0.959996
Maize	Zm00001eb327240_P001	PF01485	PF13639	PF00097	0.0643395	0.273656	0.503398
Maize	Zm00001eb327240_P002	PF00439	PF03732	PF01485	0.0580631	0.0840717	0.0893545
Maize	Zm00001eb327240_P003	PF01485	PF13639	PF00097	0.0939862	0.27883	0.370519
Maize	Zm00001eb376560_P001	PF04927	PF00188	PF05703	0.0953815	0.162022	0.248101
Maize	Zm00001eb299640_P001	PF04419	PF00010	PF00319	2.69679e-05	4.20287e-05	0.999853
Maize	Zm00001eb299640_P002	PF04419	PF00010	PF00319	1.16835e-05	1.63875e-05	0.999929
Maize	Zm00001eb078290_P001	PF00085	PF00571	PF04413	0.0446664	0.0654879	0.368817
Maize	Zm00001eb303940_P001	PF03936	PF00636	PF00042	0.0614217	0.120536	0.258234
Maize	Zm00001eb303940_P002	PF08719	PF12796	PF00042	0.0499935	0.0505467	0.127764
Maize	Zm00001eb168040_P001	PF01928	PF00293	PF12766	0.0410156	0.0484008	0.328984
Maize	Zm00001eb131290_P001	PF09763	PF00651	PF00888	0.112994	0.16942	0.206194
Maize	Zm00001eb402440_P001	PF00271	PF04669	PF00472	0.0500488	0.0724346	0.296787
Maize	Zm00001eb230430_P001	PF04774	PF15477	PF08648	0.0419383	0.0524253	0.444995
Maize	Zm00001eb075900_P001	PF13259	PF05920	PF05687	0.0866012	0.119418	0.150747
Maize	Zm00001eb073210_P001	PF00168	PF03478	PF07734	0.070865	0.0757736	0.184428
Maize	Zm00001eb366930_P001	PF03732	PF00439	PF00307	0.0396161	0.0611603	0.0663698
Maize	Zm00001eb298910_P001	PF03024	PF00646	PF01753	0.0790522	0.0903793	0.418764
Maize	Zm00001eb004540_P001	PF00098	PF00004	PF13086	0.000318404	0.000342812	0.998356
Maize	Zm00001eb366090_P002	PF13532	PF14226	PF03171	0.000538447	0.0023743	0.996365
Maize	Zm00001eb366090_P003	PF01738	PF01648	PF07985	0.0888825	0.109147	0.111148
Maize	Zm00001eb366090_P001	PF14226	PF13532	PF03171	0.0012325	0.00198507	0.996669
Maize	Zm00001eb342670_P001	PF01926	PF02463	PF00005	4.03689e-05	4.98515e-05	0.999864
Maize	Zm00001eb247820_P002	PF06747	PF14368	PF00234	0.110607	0.212039	0.250404
Maize	Zm00001eb247820_P003	PF02953	PF06747	PF02320	0.178979	0.246369	0.325138
Maize	Zm00001eb247820_P001	PF05617	PF00234	PF02320	0.130286	0.14157	0.218317
Maize	Zm00001eb440540_P001	PF14237	PF00188	PF01471	0.024224	0.0263	0.0830886
Maize	Zm00001eb154140_P001	PF00931	PF00004	PF12169	0.00269814	0.0282589	0.959301
Maize	Zm00001eb154140_P002	PF14629	PF00004	PF12169	0.00298815	0.0302101	0.956928
Maize	Zm00001eb240010_P004	PF13202	PF05686	PF00413	0.0542086	0.0562106	0.406025
Maize	Zm00001eb240010_P003	PF13202	PF05686	PF00413	0.0542086	0.0562106	0.406025
Maize	Zm00001eb240010_P001	PF05686	PF00199	PF00413	0.0797009	0.12143	0.164801
Maize	Zm00001eb240010_P002	PF05686	PF00199	PF00413	0.0797009	0.12143	0.164801
Maize	Zm00001eb130470_P004	PF14634	PF00097	PF13639	0.0282691	0.409805	0.549911
Maize	Zm00001eb130470_P005	PF14634	PF00097	PF13639	0.0282691	0.409805	0.549911
Maize	Zm00001eb130470_P002	PF14634	PF00097	PF13639	0.0282691	0.409805	0.549911
Maize	Zm00001eb130470_P003	PF14634	PF00097	PF13639	0.0282691	0.409805	0.549911
Maize	Zm00001eb130470_P001	PF14634	PF00097	PF13639	0.0282691	0.409805	0.549911
Maize	Zm00001eb207860_P001	PF13532	PF12766	PF01243	0.0434611	0.0556164	0.146903
Maize	Zm00001eb301720_P001	PF01416	PF07714	PF00069	1.33501e-05	0.0243427	0.975598
Maize	Zm00001eb301720_P002	PF00249	PF07714	PF00069	2.03826e-05	0.0294354	0.970506
Maize	Zm00001eb301720_P003	PF00249	PF07714	PF00069	4.36528e-06	0.0199888	0.980001
Maize	Zm00001eb301720_P004	PF00454	PF07714	PF00069	2.12366e-05	0.0404048	0.959535
Maize	Zm00001eb105220_P001	PF00169	PF07534	PF00447	0.109625	0.117994	0.145025
Maize	Zm00001eb423680_P001	PF03167	PF06544	PF02698	0.0555288	0.0581944	0.0689767
Maize	Zm00001eb080970_P001	PF07993	PF13460	PF04321	0.11799	0.143396	0.591358
Maize	Zm00001eb080970_P002	PF07993	PF13460	PF04321	0.076325	0.307182	0.363787
Maize	Zm00001eb049240_P003	PF00006	PF00883	PF00271	0.0583978	0.0788489	0.207985
Maize	Zm00001eb049240_P004	PF02738	PF16486	PF00271	0.0991362	0.172563	0.19312
Maize	Zm00001eb045780_P002	PF12776	PF10545	PF00249	0.00244922	0.00355607	0.98707
Maize	Zm00001eb045780_P001	PF12776	PF10545	PF00249	0.00344513	0.00736204	0.987906
Maize	Zm00001eb401440_P001	PF00646	PF00011	PF03171	0.0162842	0.0229745	0.036872
Maize	Zm00001eb383330_P002	PF03167	PF13472	PF00657	1.50075e-05	0.0604287	0.939534
Maize	Zm00001eb383330_P003	PF01464	PF13472	PF00657	0.00209152	0.162198	0.826245
Maize	Zm00001eb383330_P001	PF03629	PF13472	PF00657	0.000417206	0.149845	0.847702
Maize	Zm00001eb271040_P001	PF01966	PF12796	PF13369	0.0498869	0.177183	0.227362
Maize	Zm00001eb271040_P002	PF01756	PF13369	PF12796	0.0604229	0.0681643	0.0696472
Maize	Zm00001eb309200_P001	PF10520	PF01435	PF00487	0.0626629	0.181741	0.290978
Maize	Zm00001eb309200_P002	PF14237	PF10520	PF00487	0.10604	0.179616	0.222681
Maize	Zm00001eb157450_P001	PF00439	PF06886	PF00505	0.000884	0.00103377	0.995014
Maize	Zm00001eb266840_P001	PF00188	PF03330	PF10276	0.0937916	0.0945247	0.138198
Maize	Zm00001eb006160_P001	PF09350	PF00249	PF00472	0.0546017	0.0560479	0.0662781
Maize	Zm00001eb006160_P003	PF02179	PF00472	PF16455	0.0680034	0.0763513	0.131775
Maize	Zm00001eb006160_P002	PF09350	PF00249	PF00472	0.0546017	0.0560479	0.0662781
Maize	Zm00001eb183050_P001	PF00487	PF03441	PF12680	0.0575059	0.104112	0.115654
Maize	Zm00001eb142820_P004	PF07885	PF13664	PF16212	0.0560952	0.0633791	0.123293
Maize	Zm00001eb142820_P005	PF00097	PF16212	PF06943	0.0734409	0.0787422	0.0829504
Maize	Zm00001eb142820_P002	PF16212	PF01699	PF07884	0.0690085	0.0718474	0.0923431
Maize	Zm00001eb142820_P003	PF01485	PF00097	PF13639	0.0849021	0.0867027	0.25176
Maize	Zm00001eb142820_P001	PF00892	PF07884	PF08510	0.0515929	0.0922474	0.158472
Maize	Zm00001eb205600_P001	PF02845	PF00472	PF00011	0.0370892	0.0485089	0.0609332
Maize	Zm00001eb029770_P001	PF00168	PF10502	PF02362	0.000730784	0.00112895	0.991995
Maize	Zm00001eb403880_P004	PF00249	PF10545	PF00505	0.106131	0.173483	0.392724
Maize	Zm00001eb403880_P001	PF00249	PF10545	PF00505	0.106131	0.173483	0.392724
Maize	Zm00001eb403880_P003	PF00249	PF10545	PF00505	0.106131	0.173483	0.392724
Maize	Zm00001eb403880_P002	PF00249	PF10545	PF00505	0.106131	0.173483	0.392724
Maize	Zm00001eb206970_P001	PF04719	PF00472	PF05699	0.0311523	0.0322961	0.0387375
Maize	Zm00001eb098820_P001	PF14226	PF00091	PF12656	0.0597223	0.0627699	0.082346
Maize	Zm00001eb230230_P002	PF13847	PF13649	PF08241	0.109993	0.271094	0.392742
Maize	Zm00001eb230230_P003	PF13847	PF13649	PF08241	0.109993	0.271094	0.392742
Maize	Zm00001eb230230_P001	PF00107	PF13649	PF08241	0.0779081	0.0790903	0.239031
Maize	Zm00001eb251580_P002	PF01509	PF00370	PF00931	0.0614185	0.0663728	0.221768
Maize	Zm00001eb251580_P001	PF02441	PF00176	PF00931	0.0551632	0.0617246	0.100609
Maize	Zm00001eb302470_P001	PF10276	PF01844	PF00076	0.038194	0.0390646	0.0563615
Maize	Zm00001eb394080_P003	PF03151	PF04893	PF00892	0.153639	0.157796	0.160226
Maize	Zm00001eb394080_P001	PF01061	PF00999	PF01578	0.0699277	0.0700356	0.339236
Maize	Zm00001eb394080_P002	PF03151	PF04893	PF00892	0.153639	0.157796	0.160226
Maize	Zm00001eb048780_P001	PF17862	PF01138	PF01765	0.0383095	0.0663585	0.377361
Maize	Zm00001eb410580_P001	PF00542	PF04774	PF04927	0.0522592	0.0636199	0.452852
Maize	Zm00001eb436000_P001	PF14237	PF00188	PF01471	0.024224	0.0263	0.0830886
Maize	Zm00001eb224860_P001	PF01521	PF07145	PF05678	0.0161145	0.0259232	0.780363
Maize	Zm00001eb072870_P001	PF10545	PF12776	PF00249	0.000733093	0.00146144	0.995775
Maize	Zm00001eb072870_P004	PF06886	PF05678	PF00855	0.0453313	0.0706435	0.123273
Maize	Zm00001eb072870_P005	PF06886	PF05678	PF00855	0.0453313	0.0706435	0.123273
Maize	Zm00001eb072870_P002	PF06886	PF05678	PF00855	0.0453313	0.0706435	0.123273
Maize	Zm00001eb072870_P003	PF12776	PF05920	PF00249	0.0018355	0.00251576	0.989147
Maize	Zm00001eb289630_P001	PF00135	PF07731	PF07732	0.012923	0.34879	0.5558
Maize	Zm00001eb345790_P001	PF00089	PF07714	PF00069	9.48782e-06	0.0305357	0.969412
Maize	Zm00001eb131160_P001	PF13962	PF00689	PF02453	0.0243309	0.115927	0.72812
Maize	Zm00001eb429010_P001	PF01844	PF00024	PF00188	0.0708274	0.0830326	0.157718
Maize	Zm00001eb431960_P002	PF13532	PF14226	PF03171	8.65178e-05	0.0034261	0.99643
Maize	Zm00001eb431960_P001	PF13532	PF14226	PF03171	0.000456332	0.000799009	0.99773
Maize	Zm00001eb011950_P002	PF12894	PF10313	PF08662	0.0523558	0.0855489	0.594905
Maize	Zm00001eb011950_P001	PF13088	PF12894	PF08662	0.0537495	0.144213	0.324923
Maize	Zm00001eb394900_P001	PF00644	PF00168	PF07727	0.0327221	0.178192	0.255199
Maize	Zm00001eb033450_P001	PF00168	PF13881	PF00011	0.030202	0.0552144	0.0999585
Maize	Zm00001eb146580_P001	PF08648	PF05678	PF04774	0.0370509	0.157625	0.21233
Maize	Zm00001eb386010_P001	PF03033	PF00501	PF00534	0.0654842	0.0661351	0.0903886
Maize	Zm00001eb099160_P001	PF00361	PF03151	PF00892	0.0650031	0.0762567	0.528681
Maize	Zm00001eb327940_P001	PF04935	PF06991	PF10252	0.0619923	0.149975	0.626265
Maize	Zm00001eb327480_P001	PF02803	PF08541	PF00109	0.000733081	0.00142399	0.996248
Maize	Zm00001eb034030_P001	PF03719	PF13328	PF17177	0.00861828	0.0146871	0.886078
Maize	Zm00001eb034030_P004	PF03719	PF13328	PF17177	0.00861828	0.0146871	0.886078
Maize	Zm00001eb034030_P002	PF03719	PF13328	PF17177	0.00861828	0.0146871	0.886078
Maize	Zm00001eb034030_P003	PF03719	PF13328	PF17177	0.00861828	0.0146871	0.886078
Maize	Zm00001eb034030_P005	PF03719	PF13328	PF17177	0.00861828	0.0146871	0.886078
Maize	Zm00001eb028420_P001	PF00089	PF07714	PF00069	0.0302464	0.127612	0.428992
Maize	Zm00001eb302190_P002	PF00097	PF00498	PF00856	0.0310902	0.059608	0.722132
Maize	Zm00001eb302190_P001	PF00097	PF00498	PF00856	0.0245695	0.0501114	0.769495
Maize	Zm00001eb302190_P003	PF09348	PF04266	PF01502	0.0607052	0.0674268	0.141782
Maize	Zm00001eb233090_P002	PF01476	PF00127	PF00364	0.000628469	0.00187132	0.994213
Maize	Zm00001eb233090_P001	PF01476	PF00127	PF00364	0.000628469	0.00187132	0.994213
Maize	Zm00001eb333680_P001	PF00234	PF11938	PF04043	9.5274e-05	0.000140412	0.999351
Maize	Zm00001eb130600_P001	PF00916	PF00999	PF00361	0.06163	0.0699591	0.746531
Maize	Zm00001eb130600_P004	PF00892	PF00916	PF00361	0.122274	0.130443	0.279137
Maize	Zm00001eb130600_P003	PF00361	PF00999	PF00916	0.0882077	0.167607	0.287832
Maize	Zm00001eb130600_P002	PF00916	PF00999	PF00361	0.0709823	0.0754946	0.747302
Maize	Zm00001eb077300_P001	PF00190	PF07883	PF05899	0.0427538	0.0559941	0.825299
Maize	Zm00001eb300090_P001	PF13178	PF00319	PF00505	0.0704479	0.0949857	0.135141
Maize	Zm00001eb260600_P001	PF02771	PF00144	PF01565	0.0762731	0.0855012	0.133197
Maize	Zm00001eb260600_P002	PF02771	PF00144	PF01565	0.0827979	0.0845439	0.14058
Maize	Zm00001eb339040_P001	PF00076	PF02037	PF00035	0.0431197	0.112503	0.17398
Maize	Zm00001eb254090_P003	PF07724	PF07728	PF00004	0.0158634	0.218319	0.685433
Maize	Zm00001eb254090_P001	PF13086	PF07728	PF00004	0.0484697	0.0992589	0.785293
Maize	Zm00001eb254090_P002	PF12169	PF07728	PF00004	0.00107436	0.0319347	0.964049
Maize	Zm00001eb170580_P001	PF00027	PF07728	PF01553	0.0609274	0.0725388	0.117553
Maize	Zm00001eb360090_P001	PF00076	PF13878	PF12171	0.0463885	0.0551077	0.280264
Maize	Zm00001eb360090_P002	PF01844	PF00011	PF04997	0.0327578	0.039239	0.0424035
Maize	Zm00001eb002680_P003	PF11708	PF00182	PF00188	0.0820499	0.191004	0.447691
Maize	Zm00001eb002680_P002	PF11708	PF00182	PF14237	0.171102	0.176492	0.216999
Maize	Zm00001eb002680_P001	PF00249	PF11708	PF00188	0.133726	0.146219	0.499365
Maize	Zm00001eb218970_P002	PF01743	PF00144	PF07727	0.0745101	0.0883352	0.163343
Maize	Zm00001eb218970_P001	PF06974	PF01553	PF00144	0.0798335	0.0807567	0.103068
Maize	Zm00001eb359370_P003	PF00481	PF00082	PF00294	0.0327868	0.113068	0.142326
Maize	Zm00001eb359370_P001	PF00082	PF00294	PF01138	0.0597353	0.131589	0.13371
Maize	Zm00001eb359370_P002	PF00294	PF01592	PF00082	0.0724243	0.0857093	0.0990048
Maize	Zm00001eb359370_P004	PF00294	PF00082	PF01138	0.0391267	0.0430391	0.070109
Maize	Zm00001eb197810_P001	PF14634	PF00097	PF13639	0.173982	0.323996	0.431176
Maize	Zm00001eb168320_P001	PF02338	PF00850	PF00134	0.0834402	0.0914245	0.116907
Maize	Zm00001eb151060_P001	PF14159	PF07889	PF04695	0.0476081	0.0485288	0.351334
Maize	Zm00001eb396530_P001	PF01176	PF05699	PF11976	0.108824	0.127596	0.174388
Maize	Zm00001eb437790_P001	PF00665	PF01778	PF13456	0.045011	0.111029	0.519793
Maize	Zm00001eb318990_P004	PF00707	PF02179	PF02195	0.0439386	0.290907	0.385099
Maize	Zm00001eb318990_P003	PF00707	PF02195	PF02179	0.00243229	0.00604239	0.977838
Maize	Zm00001eb318990_P001	PF07106	PF00707	PF02179	0.00624544	0.00903807	0.943493
Maize	Zm00001eb318990_P005	PF00707	PF02195	PF02179	0.00189864	0.00529915	0.977604
Maize	Zm00001eb318990_P002	PF00707	PF02195	PF02179	0.00357409	0.00935188	0.97159
Maize	Zm00001eb152020_P001	PF00026	PF01833	PF00082	0.000557403	0.000953776	0.993454
Maize	Zm00001eb152020_P003	PF01833	PF00026	PF00082	0.0136064	0.111491	0.780467
Maize	Zm00001eb152020_P002	PF00089	PF01833	PF00082	0.000468174	0.00100304	0.995135
Maize	Zm00001eb005020_P005	PF00249	PF00046	PF05920	0.0113037	0.301324	0.618883
Maize	Zm00001eb005020_P002	PF00249	PF00046	PF05920	0.0113037	0.301324	0.618883
Maize	Zm00001eb005020_P004	PF00249	PF00046	PF05920	0.0113037	0.301324	0.618883
Maize	Zm00001eb005020_P003	PF00249	PF00046	PF05920	0.0113037	0.301324	0.618883
Maize	Zm00001eb005020_P001	PF00249	PF00046	PF05920	0.0113037	0.301324	0.618883
Maize	Zm00001eb304550_P002	PF04652	PF16987	PF00439	0.0803663	0.09955	0.120413
Maize	Zm00001eb304550_P004	PF07651	PF00615	PF04652	0.0421709	0.155933	0.493417
Maize	Zm00001eb304550_P003	PF04652	PF16987	PF00439	0.0803663	0.09955	0.120413
Maize	Zm00001eb304550_P001	PF00135	PF05603	PF05678	0.0248479	0.0683087	0.5714
Maize	Zm00001eb060290_P001	PF02140	PF00024	PF00635	0.0412604	0.0743846	0.101574
Maize	Zm00001eb323590_P001	PF05362	PF00160	PF00497	0.0438287	0.0470376	0.209915
Maize	Zm00001eb389540_P002	PF00443	PF02906	PF02338	0.0499806	0.055481	0.110393
Maize	Zm00001eb389540_P001	PF00443	PF03107	PF02338	0.064391	0.0668547	0.116673
Maize	Zm00001eb389540_P003	PF06391	PF02338	PF11331	0.0416455	0.124155	0.199474
Maize	Zm00001eb179810_P001	PF00557	PF00076	PF00171	4.7926e-06	7.0477e-06	0.999963
Maize	Zm00001eb013220_P001	PF00326	PF12697	PF00561	0.0299872	0.141458	0.821388
Maize	Zm00001eb091660_P001	PF00089	PF13966	PF13456	0.0665929	0.0794728	0.130033
Maize	Zm00001eb232030_P002	PF00704	PF00026	PF00150	0.111658	0.173947	0.246035
Maize	Zm00001eb232030_P001	PF00026	PF00704	PF00150	0.0448699	0.173452	0.40068
Maize	Zm00001eb076890_P001	PF01553	PF01699	PF00955	0.091579	0.0927686	0.149464
Maize	Zm00001eb138530_P001	PF05678	PF05703	PF13943	0.0583801	0.0746543	0.184632
Maize	Zm00001eb119470_P001	PF05236	PF02845	PF02037	0.0662711	0.0804336	0.222663
Maize	Zm00001eb057460_P001	PF00646	PF00024	PF00856	0.0571804	0.0572613	0.1791
Maize	Zm00001eb257880_P001	PF12697	PF00326	PF00561	0.0562027	0.266247	0.569402
Maize	Zm00001eb257880_P002	PF12697	PF00326	PF00561	0.0855488	0.0921973	0.754076
Maize	Zm00001eb265840_P001	PF00857	PF00168	PF00271	0.0449413	0.0516797	0.0849973
Maize	Zm00001eb087650_P001	PF01765	PF00571	PF01883	0.0939598	0.289347	0.322465
Maize	Zm00001eb087650_P003	PF00582	PF00571	PF01967	0.0445615	0.0544184	0.203555
Maize	Zm00001eb087650_P002	PF00218	PF00571	PF03328	0.0945148	0.22044	0.245712
Maize	Zm00001eb003270_P001	PF09258	PF13966	PF06454	0.0889842	0.165331	0.244005
Maize	Zm00001eb364110_P001	PF00010	PF05687	PF05678	0.130111	0.150789	0.173756
Maize	Zm00001eb308180_P001	PF04828	PF13966	PF06943	0.0403446	0.046379	0.0530629
Maize	Zm00001eb323650_P001	PF10469	PF02037	PF02195	0.0353542	0.0359214	0.103193
Maize	Zm00001eb285860_P001	PF17780	PF00026	PF07145	0.0750308	0.0774187	0.26896
Maize	Zm00001eb070110_P003	PF02037	PF11976	PF13881	0.0713918	0.112933	0.223315
Maize	Zm00001eb070110_P001	PF02037	PF00011	PF13881	0.0845456	0.109339	0.424297
Maize	Zm00001eb070110_P004	PF02037	PF11976	PF13881	0.0713918	0.112933	0.223315
Maize	Zm00001eb070110_P002	PF02037	PF11976	PF13881	0.0713918	0.112933	0.223315
Maize	Zm00001eb442010_P001	PF01205	PF13456	PF00550	0.02321	0.0267623	0.0569182
Maize	Zm00001eb208970_P002	PF01734	PF00814	PF00117	0.000735553	0.00119473	0.994894
Maize	Zm00001eb208970_P005	PF09348	PF01661	PF00117	0.0520259	0.0627044	0.0705138
Maize	Zm00001eb208970_P001	PF00551	PF00814	PF00117	9.01112e-05	0.000434626	0.998339
Maize	Zm00001eb208970_P003	PF14111	PF13976	PF13966	0.0461192	0.0630677	0.228217
Maize	Zm00001eb208970_P004	PF01048	PF00814	PF00117	0.00101359	0.00400445	0.989674
Maize	Zm00001eb300790_P001	PF03330	PF00127	PF02298	4.8638e-06	0.000181174	0.999794
Maize	Zm00001eb207610_P001	PF14368	PF00069	PF00234	0.0397847	0.0403435	0.0430388
Maize	Zm00001eb005390_P001	PF12171	PF02892	PF01844	0.0036934	0.00438668	0.96438
Maize	Zm00001eb420510_P001	PF00441	PF14432	PF17177	0.00901721	0.41748	0.459504
Maize	Zm00001eb333130_P003	PF00591	PF07766	PF02861	0.0531938	0.231656	0.296413
Maize	Zm00001eb333130_P002	PF00591	PF07766	PF02861	0.0531938	0.231656	0.296413
Maize	Zm00001eb333130_P004	PF00591	PF07766	PF02861	0.0531938	0.231656	0.296413
Maize	Zm00001eb333130_P001	PF00591	PF07766	PF02861	0.0531938	0.231656	0.296413
Maize	Zm00001eb389910_P001	PF17855	PF00134	PF00651	0.000588443	0.000747437	0.996563
Maize	Zm00001eb389910_P002	PF17855	PF00134	PF00651	0.000588443	0.000747437	0.996563
Maize	Zm00001eb008980_P001	PF03732	PF04253	PF01088	0.0421503	0.0450621	0.047077
Maize	Zm00001eb295330_P001	PF10497	PF06839	PF07884	0.0465042	0.0649682	0.0681088
Maize	Zm00001eb120360_P003	PF01636	PF07714	PF00069	3.89355e-05	0.046752	0.953158
Maize	Zm00001eb120360_P002	PF01273	PF13355	PF00497	0.0720759	0.0854677	0.420399
Maize	Zm00001eb120360_P001	PF01636	PF07714	PF00069	0.000190537	0.06705	0.932392
Maize	Zm00001eb161940_P001	PF00505	PF03167	PF00334	0.0375122	0.0544127	0.229273
Maize	Zm00001eb141230_P001	PF00581	PF00590	PF02698	0.0391788	0.0425804	0.621154
Maize	Zm00001eb141230_P002	PF02698	PF03358	PF13716	0.0117427	0.0185101	0.930698
Maize	Zm00001eb309520_P001	PF00443	PF02902	PF05699	0.0521891	0.0535819	0.0589657
Maize	Zm00001eb309520_P003	PF04194	PF00856	PF00443	0.0468429	0.0516187	0.131414
Maize	Zm00001eb309520_P002	PF00443	PF00856	PF00564	0.0543062	0.069087	0.105897
Maize	Zm00001eb231410_P001	PF01636	PF07714	PF00069	1.21025e-05	0.0131128	0.986871
Maize	Zm00001eb364960_P001	PF00651	PF01399	PF17177	0.0177601	0.0177907	0.81087
Maize	Zm00001eb364960_P002	PF00651	PF01399	PF17177	0.0177601	0.0177907	0.81087
Maize	Zm00001eb001060_P002	PF02737	PF04321	PF03446	0.127781	0.133724	0.199821
Maize	Zm00001eb001060_P001	PF04321	PF02737	PF03446	0.0881475	0.18332	0.34324
Maize	Zm00001eb378760_P001	PF00135	PF00481	PF00501	0.0176468	0.0195015	0.025342
Maize	Zm00001eb018920_P001	PF00156	PF00582	PF01872	0.0245172	0.12496	0.503375
Maize	Zm00001eb111590_P002	PF12171	PF11331	PF13878	0.12257	0.135762	0.152445
Maize	Zm00001eb111590_P001	PF10497	PF08790	PF11331	0.163527	0.176732	0.438039
Maize	Zm00001eb045980_P001	PF05678	PF00635	PF10172	0.0495002	0.0648576	0.637191
Maize	Zm00001eb278600_P003	PF00487	PF07298	PF03798	0.126269	0.132366	0.138624
Maize	Zm00001eb278600_P001	PF07298	PF01578	PF03798	0.168301	0.206338	0.321176
Maize	Zm00001eb278600_P002	PF00487	PF06472	PF03798	0.139847	0.154354	0.194713
Maize	Zm00001eb247720_P002	PF00168	PF00781	PF02362	9.84562e-05	0.000388996	0.998542
Maize	Zm00001eb247720_P001	PF01494	PF00781	PF02362	0.00014308	0.000634697	0.998438
Maize	Zm00001eb036000_P001	PF10551	PF03159	PF00657	0.0600332	0.06551	0.0739355
Maize	Zm00001eb408350_P002	PF00909	PF13906	PF00999	0.148745	0.170544	0.236337
Maize	Zm00001eb408350_P003	PF06813	PF00909	PF13906	0.143987	0.159356	0.256388
Maize	Zm00001eb408350_P001	PF00909	PF00361	PF13906	0.125848	0.203824	0.439431
Maize	Zm00001eb161140_P001	PF04043	PF14368	PF00234	0.139676	0.175258	0.212351
Maize	Zm00001eb089710_P001	PF05047	PF00141	PF00472	0.0302428	0.0470088	0.0471465
Maize	Zm00001eb021550_P002	PF08511	PF00443	PF00481	0.021156	0.0247243	0.0439722
Maize	Zm00001eb021550_P003	PF08511	PF00443	PF00481	0.021156	0.0247243	0.0439722
Maize	Zm00001eb021550_P004	PF08511	PF00443	PF00481	0.021156	0.0247242	0.0439722
Maize	Zm00001eb021550_P001	PF01432	PF01435	PF01823	0.0364143	0.0422533	0.0825275
Maize	Zm00001eb043950_P001	PF01432	PF00112	PF13640	0.077993	0.127858	0.188284
Maize	Zm00001eb227210_P001	PF02453	PF14364	PF05529	0.0899213	0.145625	0.145914
Maize	Zm00001eb103720_P001	PF15985	PF00271	PF06574	0.0576902	0.0733596	0.101924
Maize	Zm00001eb103720_P002	PF00092	PF00248	PF00271	0.0635819	0.0963056	0.105796
Maize	Zm00001eb430620_P002	PF01494	PF07228	PF00481	4.97813e-05	0.0184357	0.981304
Maize	Zm00001eb430620_P001	PF01494	PF07228	PF00481	4.97813e-05	0.0184357	0.981304
Maize	Zm00001eb159350_P004	PF12612	PF00651	PF12717	0.0295655	0.0489356	0.817795
Maize	Zm00001eb159350_P001	PF00651	PF00134	PF07651	0.0675998	0.0902512	0.368901
Maize	Zm00001eb159350_P005	PF01417	PF07651	PF00134	0.0807164	0.0961541	0.371903
Maize	Zm00001eb159350_P003	PF01417	PF07651	PF00134	0.0807164	0.0961541	0.371903
Maize	Zm00001eb159350_P002	PF00564	PF00651	PF12717	0.00575386	0.00848889	0.973667
Maize	Zm00001eb417090_P001	PF00303	PF00728	PF03936	0.0402253	0.0535187	0.135726
Maize	Zm00001eb347390_P001	PF01918	PF00403	PF00542	0.0552063	0.207682	0.387419
Maize	Zm00001eb381850_P001	PF00141	PF00059	PF06839	0.0369126	0.0477046	0.435247
Maize	Zm00001eb036560_P002	PF00168	PF13378	PF00174	0.000813511	0.00216478	0.99461
Maize	Zm00001eb036560_P001	PF00728	PF13378	PF00174	5.22977e-05	0.000917249	0.998915
Maize	Zm00001eb352630_P001	PF00501	PF01575	PF00557	0.0405187	0.0407619	0.122685
Maize	Zm00001eb077950_P001	PF00031	PF05617	PF02221	0.0804417	0.200653	0.213116
Maize	Zm00001eb226670_P001	PF03167	PF10172	PF13881	0.0264339	0.0448659	0.0722067
Maize	Zm00001eb128430_P001	PF01435	PF03798	PF13968	0.00295683	0.00419828	0.980966
Maize	Zm00001eb309570_P001	PF00291	PF01728	PF00850	0.0767011	0.100419	0.277564
Maize	Zm00001eb164440_P001	PF02698	PF00271	PF00582	0.0382368	0.0439308	0.0812012
Maize	Zm00001eb086630_P001	PF01464	PF00188	PF05678	0.0665486	0.0711854	0.161324
Maize	Zm00001eb439940_P001	PF04182	PF00472	PF01765	0.0782145	0.082131	0.128933
Maize	Zm00001eb189190_P001	PF03101	PF07727	PF03108	0.0865241	0.100608	0.176096
Maize	Zm00001eb189190_P002	PF08662	PF10313	PF03372	0.0933297	0.305363	0.386468
Maize	Zm00001eb189190_P003	PF12894	PF08662	PF10313	0.0610385	0.238609	0.466486
Maize	Zm00001eb343440_P001	PF01180	PF02861	PF00542	0.0782725	0.11347	0.223748
Maize	Zm00001eb122550_P001	PF07962	PF05920	PF00249	0.00288919	0.00895434	0.982803
Maize	Zm00001eb284360_P002	PF13426	PF00271	PF17855	0.000522866	0.00198641	0.992636
Maize	Zm00001eb284360_P001	PF13180	PF00271	PF17855	0.000962217	0.00212369	0.989402
Maize	Zm00001eb401680_P001	PF07716	PF10187	PF02037	0.0483271	0.127086	0.165764
Maize	Zm00001eb033610_P002	PF12776	PF10545	PF00249	0.000708015	0.00120754	0.996792
Maize	Zm00001eb033610_P001	PF12776	PF02201	PF00249	0.00118702	0.00754253	0.987786
Maize	Zm00001eb357530_P004	PF01636	PF07714	PF00069	5.74114e-06	0.0221201	0.977871
Maize	Zm00001eb357530_P001	PF01636	PF07714	PF00069	3.31955e-06	0.0238921	0.976101
Maize	Zm00001eb357530_P005	PF01636	PF07714	PF00069	3.31955e-06	0.0238921	0.976101
Maize	Zm00001eb357530_P002	PF01636	PF07714	PF00069	7.33235e-06	0.0214652	0.978524
Maize	Zm00001eb357530_P003	PF01636	PF07714	PF00069	1.59293e-06	0.0209608	0.979032
Maize	Zm00001eb305470_P003	PF05678	PF13259	PF13878	0.0709557	0.0994668	0.142351
Maize	Zm00001eb305470_P004	PF05678	PF13259	PF13878	0.0709557	0.0994668	0.142351
Maize	Zm00001eb305470_P002	PF05678	PF13259	PF13878	0.0709557	0.0994668	0.142351
Maize	Zm00001eb305470_P005	PF05678	PF13259	PF13878	0.0709557	0.0994668	0.142351
Maize	Zm00001eb305470_P001	PF05678	PF13259	PF13878	0.0709557	0.0994668	0.142351
Maize	Zm00001eb139800_P001	PF09405	PF07145	PF00505	0.121857	0.186786	0.211944
Maize	Zm00001eb033110_P003	PF12796	PF14432	PF17177	0.0997004	0.124477	0.359641
Maize	Zm00001eb033110_P002	PF12796	PF14432	PF17177	0.0997004	0.124477	0.359641
Maize	Zm00001eb033110_P001	PF12796	PF14432	PF17177	0.0997004	0.124477	0.359641
Maize	Zm00001eb055470_P001	PF00892	PF06813	PF01061	0.110347	0.123465	0.296674
Maize	Zm00001eb319750_P001	PF00248	PF00035	PF01471	0.0216239	0.0223387	0.0354353
Maize	Zm00001eb176360_P001	PF07885	PF03719	PF00137	0.0483069	0.050791	0.505941
Maize	Zm00001eb205030_P001	PF17874	PF12796	PF17177	0.00323516	0.00570929	0.975739
Maize	Zm00001eb205030_P005	PF17874	PF12796	PF17177	0.0044176	0.00649382	0.974855
Maize	Zm00001eb205030_P003	PF14432	PF12796	PF17177	0.00581706	0.0156122	0.930099
Maize	Zm00001eb205030_P004	PF17874	PF12796	PF17177	0.00323516	0.00570929	0.975739
Maize	Zm00001eb205030_P002	PF17874	PF12796	PF17177	0.00323516	0.00570929	0.975739
Maize	Zm00001eb199680_P001	PF07731	PF00026	PF02469	0.0457532	0.0781763	0.111612
Maize	Zm00001eb017820_P001	PF00024	PF00112	PF00188	0.0517107	0.0818057	0.157867
Maize	Zm00001eb196100_P006	PF00128	PF02018	PF00754	0.108563	0.159174	0.164898
Maize	Zm00001eb196100_P003	PF13320	PF00754	PF02018	0.0806822	0.147222	0.514529
Maize	Zm00001eb196100_P005	PF01565	PF00754	PF02018	0.147987	0.159841	0.217055
Maize	Zm00001eb196100_P002	PF00128	PF00754	PF02018	0.15031	0.171454	0.275669
Maize	Zm00001eb196100_P004	PF00251	PF00754	PF02018	0.0873335	0.14969	0.191936
Maize	Zm00001eb196100_P001	PF13320	PF00754	PF02018	0.0806822	0.147222	0.514529
Maize	Zm00001eb196100_P007	PF00128	PF02018	PF00754	0.108563	0.159174	0.164898
Maize	Zm00001eb012100_P007	PF04652	PF00307	PF01417	0.0604291	0.127685	0.268452
Maize	Zm00001eb012100_P010	PF01417	PF00076	PF00307	0.0502749	0.0603099	0.312028
Maize	Zm00001eb012100_P009	PF01417	PF00076	PF00307	0.0521177	0.0554906	0.307038
Maize	Zm00001eb012100_P008	PF00076	PF00439	PF00307	0.0479306	0.0515838	0.375538
Maize	Zm00001eb012100_P012	PF00076	PF01417	PF00307	0.0565123	0.0641873	0.26271
Maize	Zm00001eb012100_P003	PF00439	PF00076	PF00307	0.0487786	0.0537602	0.355539
Maize	Zm00001eb012100_P004	PF00808	PF00307	PF01417	0.080602	0.126713	0.231473
Maize	Zm00001eb012100_P005	PF00439	PF00076	PF00307	0.0488937	0.0537958	0.354891
Maize	Zm00001eb012100_P006	PF00439	PF00076	PF00307	0.0488937	0.0537958	0.354891
Maize	Zm00001eb012100_P001	PF00076	PF00439	PF00307	0.0479306	0.0515838	0.375538
Maize	Zm00001eb012100_P002	PF00439	PF00076	PF00307	0.0496349	0.0603584	0.326446
Maize	Zm00001eb012100_P011	PF01417	PF00076	PF00307	0.0521177	0.0554906	0.307038
Maize	Zm00001eb339300_P001	PF00536	PF07651	PF01417	0.00233532	0.0077274	0.975162
Maize	Zm00001eb249770_P001	PF02037	PF08648	PF04774	0.041344	0.0737907	0.0935568
Maize	Zm00001eb182940_P002	PF01636	PF07714	PF00069	8.95125e-06	0.024494	0.975478
Maize	Zm00001eb182940_P001	PF01636	PF07714	PF00069	1.55405e-05	0.0235491	0.97642
Maize	Zm00001eb187280_P001	PF03061	PF13302	PF00903	0.014306	0.0154509	0.853135
Maize	Zm00001eb187280_P002	PF08241	PF04909	PF00903	0.00700494	0.00966783	0.912563
Maize	Zm00001eb420460_P001	PF05047	PF11955	PF04182	0.0402697	0.0638584	0.101056
Maize	Zm00001eb439980_P001	PF00215	PF00596	PF00016	0.0377576	0.073899	0.509508
Maize	Zm00001eb210530_P001	PF00855	PF00787	PF00447	1.50913e-06	1.28143e-05	0.999982
Maize	Zm00001eb105030_P001	PF00128	PF16656	PF00149	0.00219003	0.00582711	0.985428
Maize	Zm00001eb105030_P003	PF00930	PF00251	PF13088	0.0918142	0.138552	0.159794
Maize	Zm00001eb105030_P002	PF00128	PF16656	PF00149	0.00255218	0.00562097	0.984957
Maize	Zm00001eb105030_P004	PF00026	PF00251	PF13088	0.0936095	0.139426	0.180712
Maize	Zm00001eb312980_P001	PF00364	PF13180	PF18265	0.00624223	0.0279592	0.955092
Maize	Zm00001eb312980_P002	PF00717	PF13180	PF18265	0.00244073	0.00848018	0.981109
Maize	Zm00001eb014900_P001	PF00246	PF02469	PF05193	0.0683609	0.212127	0.296289
Maize	Zm00001eb014900_P003	PF00497	PF00060	PF01105	0.0197574	0.286654	0.429956
Maize	Zm00001eb014900_P002	PF00133	PF00582	PF04253	0.0631061	0.0852717	0.156931
Maize	Zm00001eb312120_P001	PF10545	PF12776	PF00249	0.00149057	0.00240119	0.995177
Maize	Zm00001eb182310_P003	PF10252	PF06886	PF03763	0.00762843	0.0402205	0.934576
Maize	Zm00001eb182310_P004	PF10252	PF06886	PF03763	0.00762843	0.0402205	0.934576
Maize	Zm00001eb182310_P007	PF10252	PF06886	PF03763	0.00762843	0.0402205	0.934576
Maize	Zm00001eb182310_P005	PF10252	PF06886	PF03763	0.00762843	0.0402205	0.934576
Maize	Zm00001eb182310_P002	PF10252	PF06886	PF03763	0.00762843	0.0402205	0.934576
Maize	Zm00001eb182310_P006	PF10252	PF06886	PF03763	0.00762843	0.0402205	0.934576
Maize	Zm00001eb182310_P001	PF10252	PF06886	PF03763	0.00762843	0.0402205	0.934576
Maize	Zm00001eb395970_P001	PF01814	PF13499	PF07743	0.0638634	0.0945209	0.179876
Maize	Zm00001eb003580_P002	PF10350	PF12755	PF08389	0.140388	0.205016	0.253803
Maize	Zm00001eb003580_P001	PF08161	PF12717	PF03810	0.0731417	0.103028	0.118322
Maize	Zm00001eb003580_P004	PF10350	PF08389	PF12755	0.135244	0.222417	0.328493
Maize	Zm00001eb003580_P003	PF05699	PF08389	PF00651	0.0772486	0.0829101	0.121474
Maize	Zm00001eb016680_P001	PF12171	PF08573	PF00505	0.0687013	0.0726482	0.15563
Maize	Zm00001eb016680_P002	PF12171	PF00046	PF00505	0.0540241	0.0586373	0.163632
Maize	Zm00001eb016680_P003	PF12171	PF12656	PF00505	0.0494584	0.071472	0.148566
Maize	Zm00001eb070440_P001	PF13881	PF11976	PF00364	0.0612257	0.191615	0.245572
Maize	Zm00001eb308000_P002	PF02037	PF00160	PF00076	0.000115564	0.000583835	0.998693
Maize	Zm00001eb308000_P003	PF02037	PF00160	PF00076	0.000113788	0.000556197	0.998695
Maize	Zm00001eb308000_P004	PF02037	PF00160	PF00076	0.000124049	0.000489956	0.998707
Maize	Zm00001eb308000_P001	PF04059	PF00160	PF00076	0.000106209	0.0006471	0.998647
Maize	Zm00001eb308000_P005	PF04059	PF00160	PF00076	0.000774316	0.00153091	0.99509
Maize	Zm00001eb001470_P002	PF00443	PF07145	PF10419	0.0105422	0.0218385	0.718584
Maize	Zm00001eb001470_P001	PF00564	PF10440	PF10419	0.0243051	0.0266707	0.860689
Maize	Zm00001eb160470_P002	PF00294	PF07228	PF00481	1.48524e-05	0.00256883	0.997399
Maize	Zm00001eb160470_P001	PF00294	PF07228	PF00481	4.63416e-05	0.00383459	0.996077
Maize	Zm00001eb087250_P001	PF00089	PF00102	PF01852	0.0374134	0.0439098	0.655846
Maize	Zm00001eb033470_P001	PF04059	PF03467	PF00076	0.00469933	0.0496717	0.934397
Maize	Zm00001eb033470_P002	PF02362	PF04059	PF00076	0.000454536	0.0143416	0.983671
Maize	Zm00001eb101690_P001	PF00107	PF10469	PF00903	0.0323232	0.0494281	0.102648
Maize	Zm00001eb400230_P001	PF00631	PF00170	PF07716	0.133743	0.28537	0.331271
Maize	Zm00001eb312740_P001	PF03143	PF00035	PF00635	0.112296	0.163902	0.255474
Maize	Zm00001eb160370_P001	PF00011	PF00631	PF05678	0.031239	0.0330113	0.0745297
Maize	Zm00001eb361990_P001	PF01485	PF00097	PF13639	0.228321	0.279216	0.384385
Maize	Zm00001eb308980_P001	PF01048	PF00551	PF02878	0.000280035	0.000486675	0.996638
Maize	Zm00001eb239350_P001	PF03101	PF04059	PF00076	0.0103756	0.0504819	0.92081
Maize	Zm00001eb372200_P003	PF13460	PF00107	PF00294	0.0327028	0.0349168	0.489479
Maize	Zm00001eb372200_P001	PF02769	PF08501	PF02602	0.0578658	0.0672957	0.473002
Maize	Zm00001eb372200_P002	PF05116	PF00591	PF00294	4.98942e-06	7.65966e-06	0.999974
Maize	Zm00001eb098010_P001	PF02861	PF00035	PF03061	0.0272058	0.0311483	0.0646397
Maize	Zm00001eb038020_P001	PF02902	PF00439	PF00615	0.0352652	0.0556115	0.0732399
Maize	Zm00001eb252550_P001	PF00125	PF00134	PF13867	0.0579288	0.109259	0.463181
Maize	Zm00001eb316450_P003	PF04695	PF02518	PF07889	0.00510369	0.00631283	0.964929
Maize	Zm00001eb316450_P002	PF03446	PF01343	PF07889	0.00170035	0.00176941	0.992197
Maize	Zm00001eb316450_P001	PF03446	PF01343	PF07889	0.000663881	0.00122144	0.996335
Maize	Zm00001eb379920_P001	PF03364	PF01928	PF00293	2.07637e-05	6.18903e-05	0.999891
Maize	Zm00001eb223610_P001	PF13456	PF13966	PF13976	0.0888772	0.100599	0.152283
Maize	Zm00001eb185970_P001	PF00534	PF03016	PF05686	0.000137152	0.00737605	0.992274
Maize	Zm00001eb185970_P002	PF01852	PF03016	PF05686	0.00327051	0.265925	0.720913
Maize	Zm00001eb412690_P001	PF00999	PF00916	PF00955	0.103972	0.151342	0.245079
Maize	Zm00001eb412690_P002	PF00999	PF00916	PF00955	0.122138	0.141219	0.267763
Maize	Zm00001eb427330_P001	PF05066	PF00334	PF10440	0.123821	0.158635	0.308564
Maize	Zm00001eb174630_P002	PF00249	PF05920	PF00046	0.0362894	0.302501	0.551167
Maize	Zm00001eb174630_P004	PF00004	PF00069	PF00010	0.0631669	0.128869	0.178474
Maize	Zm00001eb174630_P001	PF00004	PF00069	PF00010	0.0631669	0.128869	0.178474
Maize	Zm00001eb174630_P003	PF12796	PF17874	PF17177	0.0683132	0.0813968	0.0977034
Maize	Zm00001eb103350_P005	PF04548	PF00615	PF00169	0.0916372	0.105743	0.318285
Maize	Zm00001eb103350_P003	PF04548	PF00615	PF00169	0.0916372	0.105743	0.318285
Maize	Zm00001eb103350_P004	PF04548	PF00615	PF00169	0.0845902	0.0914715	0.390736
Maize	Zm00001eb103350_P002	PF14309	PF00249	PF14383	0.0491998	0.0666939	0.0934569
Maize	Zm00001eb103350_P001	PF02362	PF00307	PF00249	0.0545351	0.0574129	0.102629
Maize	Zm00001eb253780_P001	PF00024	PF07884	PF14380	0.106132	0.131876	0.246097
Maize	Zm00001eb163040_P001	PF01966	PF01814	PF00497	0.0387534	0.051651	0.497783
Maize	Zm00001eb058930_P002	PF02845	PF00046	PF05920	0.0360888	0.192838	0.582375
Maize	Zm00001eb058930_P001	PF00249	PF00046	PF05920	0.0266476	0.264521	0.590806
Maize	Zm00001eb008870_P001	PF00665	PF10551	PF00650	0.091921	0.130345	0.393565
Maize	Zm00001eb012150_P001	PF01756	PF14432	PF17177	0.010144	0.200857	0.762708
Maize	Zm00001eb035260_P001	PF03372	PF03572	PF04389	0.114827	0.12498	0.216382
Maize	Zm00001eb214260_P001	PF02845	PF04043	PF00141	3.522e-06	4.02028e-05	0.999944
Maize	Zm00001eb201650_P001	PF00916	PF00361	PF00999	0.0921014	0.100416	0.13174
Maize	Zm00001eb267950_P001	PF00536	PF17781	PF01918	0.0575541	0.0651422	0.106801
Maize	Zm00001eb357590_P001	PF00024	PF14368	PF00234	0.00734997	0.343477	0.616065
Maize	Zm00001eb143150_P001	PF12937	PF00646	PF01753	0.00519281	0.0647813	0.920116
Maize	Zm00001eb377830_P002	PF00307	PF02463	PF00004	0.0754274	0.118937	0.306235
Maize	Zm00001eb377830_P001	PF08423	PF02463	PF00004	0.161407	0.214928	0.234198
Maize	Zm00001eb387720_P001	PF00498	PF00717	PF10447	0.0523488	0.0790855	0.107412
Maize	Zm00001eb427920_P003	PF06839	PF01088	PF06094	0.0923344	0.116369	0.126738
Maize	Zm00001eb427920_P001	PF09811	PF00141	PF01088	0.000155674	0.000163606	0.999021
Maize	Zm00001eb427920_P002	PF00141	PF01466	PF01088	0.00773673	0.0117761	0.942796
Maize	Zm00001eb427920_P004	PF07228	PF00481	PF01088	0.00383771	0.00389072	0.984348
Maize	Zm00001eb312560_P001	PF16205	PF03868	PF00125	0.0341051	0.0527659	0.700667
Maize	Zm00001eb374230_P001	PF03033	PF01593	PF00534	0.051076	0.0511724	0.1085
Maize	Zm00001eb294290_P001	PF00270	PF00004	PF00271	0.0220184	0.133631	0.300093
Maize	Zm00001eb007860_P003	PF01281	PF02926	PF07766	0.0434229	0.154646	0.194388
Maize	Zm00001eb007860_P002	PF02926	PF07766	PF01416	0.0532266	0.0542773	0.0746183
Maize	Zm00001eb007860_P001	PF01248	PF02926	PF07766	0.0320481	0.0866621	0.138373
Maize	Zm00001eb057970_P001	PF13409	PF00168	PF07059	0.00267383	0.00271358	0.988409
Maize	Zm00001eb308840_P001	PF00141	PF00646	PF05678	0.0337817	0.0394365	0.0633764
Maize	Zm00001eb442250_P001	PF00271	PF00498	PF04970	0.0232997	0.0247621	0.0325253
Maize	Zm00001eb415750_P001	PF08547	PF02298	PF02362	0.000897262	0.00310883	0.989588
Maize	Zm00001eb326410_P001	PF01417	PF07651	PF08492	0.0272256	0.0294287	0.680001
Maize	Zm00001eb374530_P001	PF03007	PF00144	PF01593	0.0645163	0.0646939	0.0809065
Maize	Zm00001eb171700_P002	PF08627	PF00892	PF03151	0.0253306	0.172148	0.797262
Maize	Zm00001eb171700_P001	PF08627	PF00892	PF03151	0.0022305	0.0546185	0.94133
Maize	Zm00001eb171700_P003	PF08627	PF00892	PF03151	0.0022305	0.0546185	0.94133
Maize	Zm00001eb002030_P001	PF01734	PF07714	PF00069	0.000329822	0.048882	0.949267
Maize	Zm00001eb345110_P004	PF00505	PF12214	PF00249	0.119874	0.189788	0.189899
Maize	Zm00001eb345110_P001	PF00505	PF12214	PF00249	0.119874	0.189788	0.189899
Maize	Zm00001eb345110_P002	PF14383	PF00505	PF07839	0.0709638	0.0959413	0.223579
Maize	Zm00001eb345110_P003	PF00505	PF12214	PF00249	0.119874	0.189788	0.189899
Maize	Zm00001eb275100_P002	PF00501	PF00689	PF00690	0.00257316	0.0180598	0.972795
Maize	Zm00001eb275100_P001	PF13180	PF00689	PF00690	0.127742	0.268824	0.29253
Maize	Zm00001eb090270_P001	PF05239	PF00571	PF00481	0.0323632	0.0368969	0.0889573
Maize	Zm00001eb198690_P002	PF14360	PF06454	PF08627	0.127529	0.128988	0.165408
Maize	Zm00001eb198690_P001	PF03798	PF07884	PF02225	0.0502567	0.0689953	0.0760297
Maize	Zm00001eb367660_P002	PF00505	PF10545	PF00249	0.000601402	0.000618295	0.99688
Maize	Zm00001eb367660_P001	PF00413	PF00188	PF00249	0.0444616	0.0502613	0.830863
Maize	Zm00001eb263490_P001	PF00631	PF05678	PF05047	0.0306979	0.0446711	0.0712877
Maize	Zm00001eb290880_P001	PF01636	PF07714	PF00069	2.28159e-05	0.0342356	0.96572
Maize	Zm00001eb437080_P001	PF00125	PF01778	PF00327	0.0984638	0.102784	0.173673
Maize	Zm00001eb349230_P001	PF13968	PF00487	PF02453	0.0582192	0.157699	0.411915
Maize	Zm00001eb062560_P001	PF12171	PF04828	PF01844	0.0368206	0.0689819	0.692452
Maize	Zm00001eb230190_P001	PF00097	PF01485	PF13639	0.0946776	0.148948	0.327349
Maize	Zm00001eb359020_P001	PF13878	PF02892	PF13966	0.105225	0.109918	0.253638
Maize	Zm00001eb011200_P001	PF00035	PF08969	PF00505	0.0344777	0.0363158	0.082419
Maize	Zm00001eb348980_P006	PF00149	PF02362	PF14416	0.000274086	0.00130477	0.996465
Maize	Zm00001eb348980_P002	PF13966	PF02362	PF14416	6.98724e-05	0.000856807	0.99875
Maize	Zm00001eb348980_P003	PF00059	PF02362	PF14416	8.14481e-05	0.000269689	0.999283
Maize	Zm00001eb348980_P007	PF13966	PF02362	PF14416	0.000425939	0.00152238	0.995339
Maize	Zm00001eb348980_P005	PF00059	PF02362	PF14416	8.14481e-05	0.000269689	0.999283
Maize	Zm00001eb348980_P004	PF13966	PF02362	PF14416	6.98724e-05	0.000856807	0.99875
Maize	Zm00001eb348980_P001	PF13966	PF02362	PF14416	6.98724e-05	0.000856807	0.99875
Maize	Zm00001eb320140_P001	PF02854	PF00382	PF00134	0.00968179	0.165312	0.78456
Maize	Zm00001eb115560_P001	PF07716	PF00631	PF00046	0.125832	0.147629	0.372777
Maize	Zm00001eb110940_P001	PF08387	PF12937	PF00646	0.00374461	0.445958	0.54387
Maize	Zm00001eb119670_P001	PF00135	PF00884	PF01471	0.0351507	0.0455018	0.0539202
Maize	Zm00001eb076850_P001	PF00534	PF00107	PF04413	0.079422	0.0934356	0.241067
Maize	Zm00001eb195540_P001	PF00156	PF00582	PF00571	0.0745005	0.0974623	0.133697
Maize	Zm00001eb135990_P002	PF04572	PF09258	PF03016	0.174799	0.239873	0.24018
Maize	Zm00001eb135990_P003	PF04572	PF09258	PF03016	0.150735	0.215842	0.247673
Maize	Zm00001eb135990_P001	PF03372	PF00149	PF03016	0.137189	0.15403	0.16252
Maize	Zm00001eb082600_P001	PF00248	PF01471	PF00724	0.0356827	0.0462369	0.0760379
Maize	Zm00001eb013500_P001	PF00076	PF14364	PF04774	0.0481856	0.0572259	0.162441
Maize	Zm00001eb279730_P001	PF13456	PF04043	PF00808	0.0504792	0.0783244	0.0802394
Maize	Zm00001eb083970_P001	PF11976	PF13881	PF13259	0.0319906	0.0388165	0.220426
Maize	Zm00001eb417490_P001	PF00505	PF11789	PF09405	0.0582406	0.0680983	0.0851313
Maize	Zm00001eb397150_P001	PF08627	PF00892	PF03151	0.00458838	0.0238307	0.970219
Maize	Zm00001eb362890_P001	PF12348	PF00134	PF07651	0.0946875	0.122341	0.167782
Maize	Zm00001eb208730_P001	PF03469	PF06148	PF02179	0.0693939	0.0846127	0.138917
Maize	Zm00001eb208730_P003	PF02179	PF02037	PF03469	0.0394364	0.0447391	0.0547682
Maize	Zm00001eb208730_P002	PF02845	PF10545	PF04782	0.0441699	0.0484434	0.0623933
Maize	Zm00001eb040620_P001	PF00035	PF01775	PF00188	0.0329569	0.0383452	0.0426992
Maize	Zm00001eb084230_P001	PF00646	PF00631	PF05678	0.022389	0.0964325	0.184758
Maize	Zm00001eb282060_P001	PF00171	PF05703	PF00109	0.0696637	0.0866566	0.0907197
Maize	Zm00001eb404540_P001	PF09402	PF06454	PF07884	0.0419812	0.073934	0.456331
Maize	Zm00001eb138090_P001	PF12923	PF13867	PF03847	0.078354	0.0884112	0.106051
Maize	Zm00001eb314270_P002	PF00454	PF13302	PF00155	0.0255531	0.0313319	0.0387181
Maize	Zm00001eb314270_P003	PF00651	PF03070	PF01397	0.0477587	0.049677	0.186426
Maize	Zm00001eb314270_P001	PF05193	PF00155	PF00685	0.0443056	0.0652597	0.0859703
Maize	Zm00001eb251040_P001	PF14634	PF00097	PF13639	0.0231452	0.403051	0.568563
Maize	Zm00001eb232460_P001	PF12680	PF13456	PF00481	0.0286405	0.0343605	0.0523181
Maize	Zm00001eb018330_P001	PF14833	PF00108	PF00171	0.0436841	0.0540049	0.0965754
Maize	Zm00001eb348390_P002	PF02338	PF00676	PF00850	3.42415e-05	4.24763e-05	0.999831
Maize	Zm00001eb348390_P001	PF00676	PF02338	PF00850	3.22402e-05	3.41173e-05	0.999877
Maize	Zm00001eb112340_P001	PF00134	PF14780	PF07651	0.0335801	0.0522906	0.580402
Maize	Zm00001eb221850_P003	PF13847	PF08241	PF13649	0.131701	0.254013	0.295131
Maize	Zm00001eb221850_P004	PF13847	PF08241	PF13649	0.131701	0.254013	0.295131
Maize	Zm00001eb221850_P001	PF13847	PF08241	PF13649	0.131702	0.254012	0.295131
Maize	Zm00001eb221850_P005	PF13847	PF08241	PF13649	0.131702	0.254012	0.295131
Maize	Zm00001eb221850_P002	PF13847	PF08241	PF13649	0.131701	0.254013	0.295131
Maize	Zm00001eb386780_P001	PF00850	PF00016	PF00128	0.0512727	0.0549374	0.0853745
Maize	Zm00001eb145170_P001	PF02469	PF07714	PF00069	1.42455e-05	0.0225152	0.977382
Maize	Zm00001eb431210_P001	PF03939	PF01176	PF00635	0.0441312	0.080939	0.319107
Maize	Zm00001eb431210_P004	PF03939	PF01176	PF00635	0.0441312	0.080939	0.319107
Maize	Zm00001eb431210_P002	PF03939	PF01176	PF00635	0.0441312	0.080939	0.319107
Maize	Zm00001eb431210_P003	PF03939	PF01176	PF00635	0.0441312	0.080939	0.319107
Maize	Zm00001eb030010_P002	PF14634	PF00097	PF13639	0.0250923	0.305726	0.652075
Maize	Zm00001eb030010_P001	PF12678	PF00097	PF13639	0.0204386	0.279358	0.67535
Maize	Zm00001eb307130_P001	PF18511	PF12937	PF00646	0.0311095	0.174773	0.775589
Maize	Zm00001eb159120_P001	PF01699	PF00361	PF00892	0.075986	0.101391	0.237887
Maize	Zm00001eb281820_P001	PF01541	PF01243	PF00271	0.0208951	0.0433682	0.0507744
Maize	Zm00001eb310960_P001	PF00498	PF00169	PF03468	0.0634124	0.0651448	0.306656
Maize	Zm00001eb158330_P001	PF00704	PF13472	PF00657	0.00896297	0.125464	0.816561
Maize	Zm00001eb054690_P001	PF13847	PF08241	PF13649	0.131473	0.382485	0.470676
Maize	Zm00001eb053020_P002	PF03330	PF01556	PF00076	0.000155502	0.000480918	0.998406
Maize	Zm00001eb053020_P001	PF12171	PF05627	PF00076	0.00163626	0.00212394	0.987982
Maize	Zm00001eb250280_P002	PF05699	PF00249	PF00646	0.0411446	0.169378	0.272699
Maize	Zm00001eb250280_P003	PF12776	PF02201	PF00249	0.00385956	0.00892714	0.981606
Maize	Zm00001eb250280_P001	PF07962	PF02201	PF00249	0.00378114	0.00830986	0.982435
Maize	Zm00001eb250280_P004	PF05699	PF00249	PF00646	0.0423187	0.172813	0.271175
Maize	Zm00001eb032690_P001	PF04774	PF05627	PF00076	0.000792372	0.00448452	0.991184
Maize	Zm00001eb032690_P003	PF04059	PF05627	PF00076	0.00125533	0.00270944	0.992671
Maize	Zm00001eb032690_P002	PF05627	PF00903	PF00076	0.002308	0.00240505	0.990208
Maize	Zm00001eb032690_P004	PF04059	PF05627	PF00076	0.00148138	0.00187004	0.993112
Maize	Zm00001eb050320_P007	PF05678	PF00505	PF12656	0.0606784	0.0885084	0.133523
Maize	Zm00001eb050320_P003	PF00505	PF00010	PF07145	0.0471376	0.0520437	0.0738581
Maize	Zm00001eb050320_P004	PF05678	PF00505	PF12656	0.0606784	0.0885084	0.133523
Maize	Zm00001eb050320_P002	PF05627	PF12656	PF09405	0.133896	0.150705	0.151702
Maize	Zm00001eb050320_P005	PF01471	PF01464	PF00188	0.0368265	0.0643535	0.0687602
Maize	Zm00001eb050320_P001	PF05678	PF00505	PF12656	0.0606784	0.0885083	0.133523
Maize	Zm00001eb050320_P006	PF05627	PF12656	PF09405	0.133896	0.150705	0.151702
Maize	Zm00001eb349640_P002	PF00026	PF02469	PF01273	0.131982	0.29715	0.425074
Maize	Zm00001eb349640_P003	PF00026	PF02469	PF01273	0.131982	0.29715	0.425074
Maize	Zm00001eb349640_P001	PF00026	PF02469	PF01273	0.131982	0.29715	0.425074
Maize	Zm00001eb316800_P001	PF02845	PF02037	PF07524	0.0615166	0.0734595	0.167565
Maize	Zm00001eb316800_P003	PF08492	PF00076	PF07557	0.067224	0.0745054	0.104568
Maize	Zm00001eb316800_P002	PF12776	PF10545	PF00249	0.124176	0.13765	0.201708
Maize	Zm00001eb220010_P003	PF00271	PF00176	PF00270	0.0829903	0.0931041	0.66024
Maize	Zm00001eb220010_P001	PF00271	PF00176	PF00270	0.079537	0.0936096	0.647084
Maize	Zm00001eb220010_P004	PF00176	PF04851	PF00270	0.0855696	0.102515	0.641368
Maize	Zm00001eb220010_P002	PF00176	PF00271	PF00270	0.167379	0.170215	0.428591
Maize	Zm00001eb270180_P001	PF10545	PF14303	PF07741	0.0514635	0.111591	0.113172
Maize	Zm00001eb043190_P001	PF02582	PF04678	PF01435	0.037043	0.0476051	0.369991
Maize	Zm00001eb043190_P002	PF00615	PF02582	PF01435	0.0421747	0.108263	0.25116
Maize	Zm00001eb052070_P003	PF03941	PF14383	PF13178	0.0541801	0.0866548	0.506454
Maize	Zm00001eb052070_P001	PF00046	PF13178	PF05920	0.0992201	0.113373	0.395384
Maize	Zm00001eb052070_P002	PF00249	PF00046	PF05920	0.0780043	0.160054	0.415659
Maize	Zm00001eb183730_P001	PF03061	PF00271	PF00571	0.0362672	0.082376	0.136468
Maize	Zm00001eb236180_P001	PF00089	PF00082	PF12708	0.0674591	0.295939	0.536268
Maize	Zm00001eb236180_P002	PF00089	PF00082	PF12708	0.0674591	0.295939	0.536268
Maize	Zm00001eb147740_P001	PF13919	PF09405	PF12656	0.120478	0.144927	0.201601
Maize	Zm00001eb190580_P001	PF05617	PF00234	PF14368	0.00951839	0.476909	0.505378
Maize	Zm00001eb108650_P001	PF00481	PF00850	PF00588	0.000252213	0.000667872	0.997687
Maize	Zm00001eb108650_P002	PF00582	PF00588	PF13456	0.068043	0.0741622	0.10293
Maize	Zm00001eb055000_P001	PF01648	PF00576	PF12680	0.0447732	0.0522133	0.0735819
Maize	Zm00001eb194540_P001	PF01167	PF16035	PF02362	0.050086	0.138281	0.414517
Maize	Zm00001eb043450_P001	PF00076	PF02362	PF00252	0.126272	0.166469	0.175556
Maize	Zm00001eb215220_P003	PF01058	PF02782	PF13532	0.127825	0.149691	0.187234
Maize	Zm00001eb215220_P001	PF13532	PF02782	PF00814	0.129317	0.193623	0.215942
Maize	Zm00001eb215220_P002	PF01494	PF00814	PF02782	0.144437	0.226272	0.343101
Maize	Zm00001eb215220_P004	PF00109	PF03478	PF02782	0.0543474	0.0555434	0.0925363
Maize	Zm00001eb396030_P001	PF00571	PF01590	PF13426	0.123314	0.125275	0.153517
Maize	Zm00001eb174590_P001	PF02836	PF00150	PF00128	0.000230495	0.00384888	0.994991
Maize	Zm00001eb146870_P001	PF01909	PF05699	PF00550	0.0564746	0.0621082	0.143849
Maize	Zm00001eb350740_P001	PF17035	PF02179	PF07303	0.104838	0.14232	0.145143
Maize	Zm00001eb350740_P002	PF07303	PF10650	PF02179	0.0989895	0.118459	0.135683
Maize	Zm00001eb180190_P001	PF02953	PF02320	PF05699	0.0789563	0.126827	0.139766
Maize	Zm00001eb340930_P001	PF00098	PF01753	PF00856	0.0501614	0.1253	0.128356
Maize	Zm00001eb218230_P001	PF00582	PF02861	PF00571	0.0628859	0.126917	0.196964
Maize	Zm00001eb185570_P001	PF08387	PF00646	PF18511	0.0349605	0.250914	0.663022
Maize	Zm00001eb329460_P001	PF07714	PF00481	PF00069	0.0658296	0.135802	0.418349
Maize	Zm00001eb393610_P001	PF01636	PF07714	PF00069	1.04694e-05	0.0148407	0.985127
Maize	Zm00001eb022910_P003	PF12656	PF09329	PF01926	0.0676638	0.143596	0.459334
Maize	Zm00001eb022910_P002	PF12656	PF09329	PF01926	0.0676638	0.143596	0.459334
Maize	Zm00001eb022910_P001	PF12656	PF09329	PF01926	0.0676638	0.143596	0.459334
Maize	Zm00001eb008100_P001	PF10469	PF00635	PF13656	0.133796	0.168335	0.218795
Maize	Zm00001eb093790_P001	PF13456	PF00141	PF04043	0.0456403	0.0986786	0.100834
Maize	Zm00001eb358430_P002	PF00175	PF00027	PF00501	0.0253309	0.126775	0.164239
Maize	Zm00001eb358430_P001	PF00646	PF02902	PF10551	0.0390283	0.0469815	0.0548598
Maize	Zm00001eb003210_P001	PF00010	PF07716	PF00170	0.0746162	0.428052	0.491423
Maize	Zm00001eb021930_P001	PF00724	PF01261	PF00903	0.0481744	0.129923	0.260153
Maize	Zm00001eb150070_P001	PF00125	PF00472	PF05047	0.0264462	0.0380459	0.0498282
Maize	Zm00001eb421340_P001	PF00646	PF08387	PF18511	0.045548	0.0879214	0.853651
Maize	Zm00001eb421340_P003	PF00646	PF08387	PF18511	0.045548	0.0879214	0.853651
Maize	Zm00001eb421340_P002	PF00646	PF08387	PF18511	0.045548	0.0879214	0.853651
Maize	Zm00001eb300940_P001	PF12756	PF02892	PF12171	0.0476195	0.0736727	0.617986
Maize	Zm00001eb371920_P001	PF00139	PF00026	PF01095	0.0956734	0.100755	0.171292
Maize	Zm00001eb215440_P001	PF00046	PF04438	PF00505	0.0643659	0.105529	0.135745
Maize	Zm00001eb031550_P001	PF01205	PF01471	PF12656	0.0462414	0.0570691	0.116126
Maize	Zm00001eb439840_P001	PF14237	PF00188	PF01471	0.024224	0.0263	0.0830886
Maize	Zm00001eb269160_P001	PF00027	PF00102	PF01852	0.000182498	0.000565534	0.998588
Maize	Zm00001eb437210_P001	PF10536	PF00487	PF00128	0.0487413	0.0892219	0.113844
Maize	Zm00001eb437900_P001	PF14237	PF00188	PF01471	0.024224	0.0263	0.0830886
Maize	Zm00001eb288010_P001	PF04893	PF02714	PF01061	0.0631901	0.0758452	0.441775
Maize	Zm00001eb145340_P002	PF03441	PF10545	PF12776	0.0525812	0.110728	0.29832
Maize	Zm00001eb145340_P001	PF00505	PF12776	PF10545	0.0586539	0.103721	0.150519
Maize	Zm00001eb242970_P001	PF00135	PF00326	PF00319	0.0309939	0.0320975	0.1143
Maize	Zm00001eb052650_P001	PF04997	PF04828	PF00111	0.000493283	0.000980156	0.996826
Maize	Zm00001eb342010_P001	PF00294	PF07228	PF00481	5.53513e-05	0.0229954	0.976706
Maize	Zm00001eb258310_P002	PF00501	PF01553	PF01852	0.0664482	0.0714454	0.269879
Maize	Zm00001eb258310_P001	PF00982	PF00534	PF03016	0.180946	0.287487	0.29772
Maize	Zm00001eb066640_P004	PF06839	PF00168	PF02362	9.78961e-05	0.000510001	0.997972
Maize	Zm00001eb066640_P002	PF00076	PF00168	PF02362	0.000535181	0.00135897	0.994635
Maize	Zm00001eb066640_P001	PF14111	PF00168	PF02362	0.000108701	0.00053363	0.997845
Maize	Zm00001eb066640_P003	PF14111	PF00168	PF02362	0.000142649	0.000607117	0.99751
Maize	Zm00001eb066640_P005	PF00135	PF00787	PF00447	0.0665875	0.126724	0.215211
Maize	Zm00001eb363440_P001	PF01176	PF00581	PF00856	0.0819832	0.143112	0.161893
Maize	Zm00001eb074720_P001	PF13867	PF06943	PF08790	0.0526022	0.119629	0.236612
Maize	Zm00001eb410290_P001	PF13178	PF00472	PF05703	0.0315803	0.10525	0.107233
Maize	Zm00001eb060060_P001	PF00646	PF01243	PF00011	0.0242149	0.0282152	0.0287869
Maize	Zm00001eb174210_P002	PF02854	PF07524	PF07651	0.0673942	0.102936	0.285211
Maize	Zm00001eb174210_P003	PF02854	PF07524	PF07651	0.0673942	0.102936	0.285211
Maize	Zm00001eb174210_P001	PF02854	PF07524	PF07651	0.0673942	0.102936	0.285211
Maize	Zm00001eb307670_P001	PF12708	PF04043	PF01095	0.0629126	0.070023	0.574305
Maize	Zm00001eb010090_P001	PF04419	PF00505	PF00631	0.0496856	0.0682621	0.170157
Maize	Zm00001eb036520_P001	PF13966	PF00646	PF00481	0.0548009	0.0628052	0.0884505
Maize	Zm00001eb276870_P001	PF12894	PF13088	PF08662	0.0856654	0.119578	0.655818
Maize	Zm00001eb276870_P002	PF12894	PF13088	PF08662	0.0897012	0.142803	0.538352
Maize	Zm00001eb324510_P003	PF00849	PF00562	PF03143	0.00355769	0.00368885	0.970793
Maize	Zm00001eb324510_P001	PF02852	PF01967	PF03143	0.00252623	0.00733983	0.959974
Maize	Zm00001eb324510_P002	PF02852	PF01967	PF03143	0.00252623	0.00733983	0.959974
Maize	Zm00001eb222550_P001	PF00042	PF08511	PF08718	0.122061	0.166926	0.167515
Maize	Zm00001eb222550_P004	PF00042	PF08718	PF08511	0.126177	0.153465	0.192846
Maize	Zm00001eb222550_P002	PF02861	PF00550	PF00542	0.0513343	0.150886	0.24589
Maize	Zm00001eb222550_P003	PF13023	PF17177	PF01397	0.0829007	0.156219	0.211729
Maize	Zm00001eb418770_P001	PF01423	PF01061	PF04893	0.0568673	0.0594294	0.12015
Maize	Zm00001eb204470_P001	PF00999	PF16916	PF01435	0.0390782	0.0458549	0.165792
Maize	Zm00001eb229740_P001	PF06047	PF06991	PF07808	0.0728643	0.154584	0.165805
Maize	Zm00001eb180430_P001	PF00089	PF10172	PF05678	0.0490709	0.160434	0.290403
Maize	Zm00001eb328860_P001	PF02878	PF04043	PF00141	3.33494e-05	0.000251321	0.999645
Maize	Zm00001eb179900_P001	PF16900	PF02721	PF08646	0.159219	0.343154	0.412756
Maize	Zm00001eb207820_P002	PF00271	PF02906	PF00682	0.0225105	0.0387157	0.867822
Maize	Zm00001eb207820_P001	PF02906	PF00271	PF00682	0.0329433	0.034103	0.837001
Maize	Zm00001eb308690_P004	PF00646	PF00817	PF00651	0.0170164	0.0264577	0.717195
Maize	Zm00001eb308690_P002	PF00271	PF01743	PF03031	0.0767593	0.16892	0.203835
Maize	Zm00001eb308690_P005	PF00271	PF00817	PF00651	0.0359873	0.0488182	0.544037
Maize	Zm00001eb308690_P001	PF00271	PF00817	PF00651	0.0359873	0.0488182	0.544037
Maize	Zm00001eb308690_P003	PF00275	PF00550	PF00651	0.0812926	0.110076	0.183924
Maize	Zm00001eb177180_P001	PF00097	PF13639	PF01485	0.00824832	0.0160405	0.972291
Maize	Zm00001eb059970_P001	PF09405	PF02892	PF12171	0.0417795	0.187576	0.460815
Maize	Zm00001eb013300_P001	PF14237	PF01061	PF04893	0.0508151	0.113851	0.597073
Maize	Zm00001eb163980_P001	PF00031	PF04043	PF11938	0.073606	0.165677	0.647228
Maize	Zm00001eb163980_P002	PF00031	PF04043	PF11938	0.073606	0.165677	0.647228
Maize	Zm00001eb256870_P001	PF00505	PF07460	PF12656	0.0653362	0.0702296	0.170009
Maize	Zm00001eb082940_P001	PF02771	PF08585	PF00550	0.0325607	0.0325648	0.0773937
Maize	Zm00001eb113990_P001	PF05920	PF06943	PF01753	0.0421199	0.073924	0.130098
Maize	Zm00001eb170050_P001	PF03330	PF01471	PF00135	0.0401814	0.0448558	0.083973
Maize	Zm00001eb106010_P002	PF00892	PF13906	PF00361	0.118262	0.232493	0.239492
Maize	Zm00001eb106010_P001	PF00909	PF13906	PF00361	0.0454688	0.149105	0.649166
Maize	Zm00001eb106010_P003	PF00892	PF03151	PF00361	0.119015	0.12893	0.143875
Maize	Zm00001eb386160_P001	PF01636	PF07714	PF00069	0.000330945	0.0449145	0.954328
Maize	Zm00001eb374640_P002	PF10536	PF00564	PF07522	0.0539192	0.0676232	0.208184
Maize	Zm00001eb374640_P001	PF00564	PF10536	PF07522	0.0911793	0.112866	0.398028
Maize	Zm00001eb276890_P001	PF00403	PF00635	PF11976	0.0494504	0.0558681	0.250524
Maize	Zm00001eb182450_P001	PF01105	PF02298	PF00487	0.0481393	0.103388	0.130322
Maize	Zm00001eb156200_P001	PF00141	PF00481	PF07884	0.0211234	0.0211516	0.0800216
Maize	Zm00001eb211480_P001	PF00168	PF00076	PF00010	0.0446833	0.0524356	0.0669201
Maize	Zm00001eb429230_P001	PF00704	PF13472	PF00657	4.78505e-05	0.126046	0.873795
Maize	Zm00001eb055710_P001	PF13178	PF12656	PF04774	0.0598064	0.0859287	0.103377
Maize	Zm00001eb172370_P001	PF01485	PF00097	PF13639	0.052373	0.0936366	0.288566
Maize	Zm00001eb410020_P001	PF06221	PF00097	PF00443	0.0867172	0.136052	0.218069
Maize	Zm00001eb291170_P002	PF00651	PF00168	PF05641	0.0624409	0.102072	0.117934
Maize	Zm00001eb291170_P003	PF00856	PF00169	PF00443	0.0277104	0.0425833	0.65712
Maize	Zm00001eb291170_P004	PF00622	PF00059	PF00443	0.0636212	0.0736141	0.466447
Maize	Zm00001eb291170_P001	PF00622	PF00059	PF00443	0.0636212	0.0736141	0.466447
Maize	Zm00001eb133900_P001	PF01416	PF07714	PF00069	0.000102471	0.03779	0.961569
Maize	Zm00001eb133900_P002	PF01416	PF07714	PF00069	0.000102471	0.03779	0.961569
Maize	Zm00001eb133900_P004	PF00112	PF12894	PF08662	0.0169186	0.0827385	0.531205
Maize	Zm00001eb133900_P003	PF07727	PF07714	PF00069	0.000491886	0.0801971	0.918026
Maize	Zm00001eb314520_P001	PF00027	PF00060	PF07885	0.0708011	0.11412	0.309858
Maize	Zm00001eb389140_P001	PF01636	PF01612	PF00651	0.0218891	0.0402642	0.714689
Maize	Zm00001eb156890_P001	PF00855	PF03732	PF14111	0.110085	0.254715	0.295041
Maize	Zm00001eb104850_P001	PF00249	PF07714	PF00069	6.13913e-06	0.0103838	0.989595
Maize	Zm00001eb104850_P003	PF00249	PF07714	PF00069	1.12579e-05	0.0126468	0.987314
Maize	Zm00001eb104850_P002	PF00249	PF07714	PF00069	6.13913e-06	0.0103838	0.989595
Maize	Zm00001eb038240_P001	PF13462	PF00443	PF01814	0.0362154	0.0423247	0.0675059
Maize	Zm00001eb064040_P003	PF00346	PF17172	PF00650	0.0566584	0.0757469	0.0835618
Maize	Zm00001eb064040_P001	PF00346	PF00650	PF17172	0.0736543	0.0771681	0.139687
Maize	Zm00001eb064040_P002	PF00346	PF17172	PF00650	0.0566584	0.0757469	0.0835618
Maize	Zm00001eb286000_P001	PF00501	PF02861	PF01137	0.0495804	0.0599976	0.0958823
Maize	Zm00001eb300230_P001	PF00188	PF00127	PF07145	0.0425176	0.0445667	0.246887
Maize	Zm00001eb037070_P001	PF00085	PF11835	PF00076	0.00209638	0.0041846	0.973406
Maize	Zm00001eb339080_P002	PF12169	PF07728	PF00004	0.0136516	0.0234647	0.95316
Maize	Zm00001eb339080_P001	PF07728	PF12169	PF00004	0.0182298	0.0225451	0.950314
Maize	Zm00001eb383140_P001	PF03061	PF01541	PF01509	0.0383175	0.0487404	0.172413
Maize	Zm00001eb383140_P002	PF00134	PF10536	PF00069	0.0515009	0.0875077	0.174337
Maize	Zm00001eb097880_P001	PF00170	PF07716	PF06886	0.185425	0.230738	0.259874
Maize	Zm00001eb097880_P002	PF07716	PF00505	PF06886	0.00917429	0.0109469	0.951423
Maize	Zm00001eb341680_P004	PF00650	PF02338	PF00303	0.0492329	0.0502481	0.135585
Maize	Zm00001eb341680_P005	PF16953	PF05004	PF12796	0.0229063	0.0620167	0.578946
Maize	Zm00001eb341680_P001	PF14780	PF01909	PF03828	0.0308174	0.113102	0.275439
Maize	Zm00001eb341680_P003	PF00650	PF02338	PF00303	0.0492329	0.0502481	0.135585
Maize	Zm00001eb341680_P002	PF00650	PF02338	PF00303	0.0492329	0.0502481	0.135585
Maize	Zm00001eb115580_P001	PF04927	PF13881	PF05678	0.0443626	0.136235	0.562581
Maize	Zm00001eb050630_P001	PF00909	PF13962	PF13906	0.00384741	0.0123108	0.972616
Maize	Zm00001eb333850_P001	PF00646	PF07524	PF10536	0.0359623	0.0370483	0.0372085
Maize	Zm00001eb380390_P001	PF01753	PF00149	PF14416	2.96276e-05	8.37572e-05	0.999724
Maize	Zm00001eb281650_P001	PF00089	PF13456	PF00481	0.0337897	0.0404884	0.250613
Maize	Zm00001eb338250_P001	PF00454	PF07714	PF00069	1.50129e-05	0.0101394	0.989808
Maize	Zm00001eb338250_P002	PF00249	PF07714	PF00069	1.17614e-05	0.00930126	0.990661
Maize	Zm00001eb092310_P001	PF01485	PF00097	PF13639	0.0104475	0.249257	0.726686
Maize	Zm00001eb146380_P001	PF07786	PF01794	PF00361	0.0583836	0.152813	0.256772
Maize	Zm00001eb146380_P002	PF01578	PF01794	PF00361	0.0905691	0.158993	0.303997
Maize	Zm00001eb209450_P001	PF00505	PF06886	PF03763	0.000677751	0.00245272	0.996
Maize	Zm00001eb209450_P002	PF00505	PF06886	PF03763	0.000599925	0.00198218	0.996592
[truncated: 326,506+ more rows]
