# Supplementary material for: Functional annotation of proteins for signaling network inference in non-model species
Source: Research Square preprint supplement (doi:10.21203/rs.3.rs-2201240/v1), 2022-11-11
Supplement: Supplementary file 9 [file c2ebd3152db631a72c96401b.xlsx]

## Sheet: Kinases
Supplementary Table S6 - Gene information collected from soybase of the newly predicted soybean kinases (sheet 1) and phosphatases (sheet 2) by PF-NET.
ID	Prob	Top Ath BLASTP Hit	Gene Ontology Molecular Function Descriptions	Panther IDs	Panther_Descriptions
Glyma.01G224200	0.887773	AT4G11110.1	ATP binding; protein binding; protein kinase activity	PTHR22847	WD40 REPEAT PROTEIN
Glyma.03G004500	0.703968	AT2G40980.1	transferase activity, transferring phosphorus-containing groups	NA	NA
Glyma.03G222000	0.818724	AT2G47180.1	inositol 3-alpha-galactosyltransferase activity; transferase activity, transferring hexosyl groups	PTHR11183	GLYCOGENIN
Glyma.06G109400	0.813576	AT1G21980.1	1-phosphatidylinositol-4-phosphate 5-kinase activity; ATP binding	PTHR23086	PHOSPHATIDYLINOSITOL-4-PHOSPHATE 5-KINASE
Glyma.06G145700	0.69463	AT5G64940.2	transferase activity, transferring phosphorus-containing groups	PTHR10566	CHAPERONE-ACTIVITY OF BC1 COMPLEX (CABC1)-RELATED
Glyma.07G230800	0.736109	AT2G27880.1	nucleic acid binding	NA	NA
Glyma.09G042000	0.81483	AT3G06810.1	acyl-CoA dehydrogenase activity; transferring phosphorus-containing groups	PTHR10909	ELECTRON TRANSPORT OXIDOREDUCTASE
Glyma.09G239500	0.671962	AT1G35710.1	ATP binding; protein kinase activity; protein serine/threonine kinase activity	PTHR24420	LEUCINE-RICH REPEAT RECEPTOR-LIKE PROTEIN KINASE
Glyma.09G270400	0.810455	AT4G21400.1	ATP binding; protein kinase activity	PTHR24420	LEUCINE-RICH REPEAT RECEPTOR-LIKE PROTEIN KINASE
Glyma.13G252200	0.746019	NA	NA	PTHR24420	LEUCINE-RICH REPEAT RECEPTOR-LIKE PROTEIN KINASE
Glyma.14G218900	0.813106	AT1G47830.1	protein transporter activity	PTHR11753	CLATHRIN COAT ASSEMBLY PROTEIN
Glyma.16G024600	0.696821	AT1G01320.2	NA	PTHR12601	EUKARYOTIC TRANSLATION INITIATION FACTOR 3 SUBUNIT (EIF-3)
Glyma.16G184500	0.695926	AT2G34930.1	NA	PTHR24420	LEUCINE-RICH REPEAT RECEPTOR-LIKE PROTEIN KINASE
Glyma.17G257900	0.808469	AT1G47830.1	protein transporter activity	PTHR11753	CLATHRIN COAT ASSEMBLY PROTEIN
Glyma.18G158900	0.68623	AT3G07270.1	GTP cyclohydrolase I activity	PTHR11109	GTP CYCLOHYDROLASE I
Glyma.18G230300	0.913843	AT2G24990.1	ATP binding; protein serine/threonine kinase activity	PTHR10593	SERINE/THREONINE-PROTEIN KINASE RIO
Glyma.19G121400	0.739128	AT2G40980.1	transferase activity, transferring phosphorus-containing groups	NA	NA
Glyma.19G226000	0.793475	AT1G09450.1	histone kinase activity (H3-T11 specific); protein kinase activity	PTHR24419	INTERLEUKIN-1 RECEPTOR-ASSOCIATED KINASE
Glyma.19G227800	0.758281	AT1G56600.1	inositol 3-alpha-galactosyltransferase activity; transferase activity, transferring glycosyl groups	PTHR11183	GLYCOGENIN
Glyma.20G080700	0.758526	AT2G34930.1	NA	PTHR24420	LEUCINE-RICH REPEAT RECEPTOR-LIKE PROTEIN KINASE

## Sheet: Phosphatases
Supplementary Table S6 - Gene information collected from soybase of the newly predicted soybean kinases (sheet 1) and phosphatases (sheet 2) by PF-NET.
ID	Prob	Top Ath BLASTP Hit	Gene Ontology Molecular Function Descriptions	Panther IDs	Panther_Descriptions
Glyma.01G005100	0.523243	AT2G19800.1	inositol oxygenase activity; iron ion binding	PTHR12588	MYOINOSITOL OXYGENASE
Glyma.01G195500	0.865536	AT5G65890.1	amino acid binding	PTHR13734	TRNA-NUCLEOTIDYLTRANSFERASE/POLY(A) POLYMERASE FAMILY MEMBER
Glyma.02G251400	0.761941	AT5G05980.2	ATP binding; ligase activity; tetrahydrofolylpolyglutamate synthase activity	PTHR11136	FOLYLPOLYGLUTAMATE SYNTHASE-RELATED
Glyma.02G268600	0.981637	AT3G47810.3	hydrolase activity, acting on ester bonds; protein serine/threonine phosphatase activity	PTHR11124	VACUOLAR SORTING PROTEIN VPS29
Glyma.04G062800	0.621824	AT5G11000.1	molecular function	NA	NA
Glyma.04G115800	0.597903	AT1G26740.1	structural constituent of ribosome	NA	NA
Glyma.04G224100	0.635878	AT3G10850.1	hydrolase activity; hydroxyacylglutathione hydrolase activity; zinc ion binding	PTHR11935	BETA LACTAMASE DOMAIN
Glyma.05G137700	0.692176	AT1G43722.1	molecular function	PTHR22930	UNCHARACTERIZED
Glyma.06G198600	0.539866	AT2G03430.1	NA	NA	NA
Glyma.08G081300	0.693984	AT3G58130.2	molecular function	PTHR12993	N-ACETYLGLUCOSAMINYL-PHOSPHATIDYLINOSITOL DE-N-ACETYLASE-RELATED
Glyma.10G116900	0.534958	AT5G49910.1	ATP binding; protein binding; unfolded protein binding	PTHR19375	HEAT SHOCK PROTEIN 70KDA
Glyma.14G048800	0.991283	AT3G47810.3	hydrolase activity, acting on ester bonds; protein serine/threonine phosphatase activity	PTHR11124	VACUOLAR SORTING PROTEIN VPS29
Glyma.16G006900	0.959986	NA	NA	NA	NA
Glyma.16G082700	0.588852	AT4G12910.1	serine-type carboxypeptidase activity	PTHR11802	SERINE PROTEASE FAMILY S10 SERINE CARBOXYPEPTIDASE
Glyma.17G159500	0.546227	AT5G65890.1	amino acid binding	PTHR13734	TRNA-NUCLEOTIDYLTRANSFERASE/POLY(A) POLYMERASE FAMILY MEMBER
Glyma.18G034200	0.528158	AT5G05980.2	ATP binding; ligase activity; tetrahydrofolylpolyglutamate synthase activity	PTHR11136	FOLYLPOLYGLUTAMATE SYNTHASE-RELATED
Glyma.18G213700	0.689965	AT3G51580.1	molecular function	NA	NA
Glyma.20G012300	0.629858	AT1G14720.1	hydrolase activity, acting on glycosyl bonds; xyloglucan:xyloglucosyl transferase activity	NA	NA
Glyma.20G034600	0.601258	AT1G08750.3	GPI-anchor transamidase activity; cysteine-type endopeptidase activity	PTHR12000	HEMOGLOBINASE FAMILY MEMBER
