# Supplementary material for: Functional annotation of proteins for signaling network inference in non-model species
Source: Research Square preprint supplement (doi:10.21203/rs.3.rs-2201240/v1), 2022-11-11
Supplement: Supplementary file 10 [file e6fc86e0564b2de62cbb9d52.xlsx]

## Sheet: Blad1
Supplementary Table S3 - Identified kinases and phosphatases in yeast according to PF-NET, HMMER, and the ground truth, here represented by a manually curated list of biochemical experimentally validated kinases and phosphatases.
Family	Gene	Groundthruth	PF-NET	HMMER
Kinase	AI4		Y
Kinase	AKL1	Y	Y	Y
Kinase	ARK1	Y	Y	Y
Kinase	ATG1	Y	Y	Y
Kinase	BCK1	Y	Y	Y
Kinase	BUB1	Y	Y	Y
Kinase	BUD32	Y
Kinase	CAK1	Y	Y	Y
Kinase	CBK1	Y	Y	Y
Kinase	CDC15	Y	Y	Y
Kinase	CDC28	Y	Y	Y
Kinase	CDC5	Y	Y	Y
Kinase	CDC7	Y	Y	Y
Kinase	CEX1		Y
Kinase	CHK1	Y	Y	Y
Kinase	CKA1	Y	Y	Y
Kinase	CKA2		Y	Y
Kinase	CKB1	Y
Kinase	CKB2	Y
Kinase	CLA4	Y	Y	Y
Kinase	CMK1	Y	Y	Y
Kinase	CMK2	Y	Y	Y
Kinase	CTK1	Y	Y	Y
Kinase	DBF2	Y	Y	Y
Kinase	DBF20		Y	Y
Kinase	DBF4	Y
Kinase	DUN1	Y	Y	Y
Kinase	ELM1	Y	Y	Y
Kinase	ENV7	Y	Y	Y
Kinase	FMP48	Y	Y	Y
Kinase	FPK1	Y	Y	Y
Kinase	FRK1	Y	Y	Y
Kinase	FUS3	Y	Y	Y
Kinase	GCN2	Y	Y	Y
Kinase	GIN4	Y	Y	Y
Kinase	HAL5	Y	Y	Y
Kinase	HOG1	Y	Y	Y
Kinase	HRK1	Y	Y	Y
Kinase	HRR25	Y	Y	Y
Kinase	HSL1		Y	Y
Kinase	IKS1	Y	Y	Y
Kinase	IME2	Y	Y	Y
Kinase	IPL1	Y	Y	Y
Kinase	IRE1	Y	Y	Y
Kinase	ISR1	Y	Y	Y
Kinase	KCC4	Y	Y	Y
Kinase	KDX1		Y	Y
Kinase	KIC1	Y	Y	Y
Kinase	KIN1	Y	Y	Y
Kinase	KIN2	Y	Y	Y
Kinase	KIN28	Y	Y	Y
Kinase	KIN3	Y	Y	Y
Kinase	KIN4	Y	Y	Y
Kinase	KIN82	Y	Y	Y
Kinase	KKQ8		Y	Y
Kinase	KNS1	Y	Y	Y
Kinase	KSP1	Y	Y	Y
Kinase	KSS1	Y	Y	Y
Kinase	MCK1	Y	Y	Y
Kinase	MEC1	Y
Kinase	MEK1	Y	Y	Y
Kinase	MKK1	Y	Y	Y
Kinase	MKK2	Y	Y	Y
Kinase	MPS1	Y	Y	Y
Kinase	MRK1		Y	Y
Kinase	NNK1	Y	Y	Y
Kinase	NPR1	Y	Y	Y
Kinase	PBS2	Y	Y	Y
Kinase	PHO85	Y	Y	Y
Kinase	PKC1	Y	Y	Y
Kinase	PKH1	Y	Y	Y
Kinase	PKH2	Y	Y	Y
Kinase	PKH3	Y	Y	Y
Kinase	POS5	Y
Kinase	PRK1	Y	Y	Y
Kinase	PRR1	Y	Y	Y
Kinase	PRR2	Y	Y	Y
Kinase	PSK1	Y	Y	Y
Kinase	PSK2	Y	Y	Y
Kinase	PTK1		Y	Y
Kinase	PTK2	Y	Y	Y
Kinase	RAD53	Y	Y	Y
Kinase	RAD9	Y
Kinase	RCK1	Y	Y	Y
Kinase	RCK2	Y	Y	Y
Kinase	RIM11	Y	Y	Y
Kinase	RIM15	Y	Y	Y
Kinase	RIO1	Y
Kinase	RIO2	Y
Kinase	RTK1		Y	Y
Kinase	SAK1	Y	Y	Y
Kinase	SAT4	Y	Y	Y
Kinase	SCH9		Y	Y
Kinase	SCY1		Y	Y
Kinase	SGV1	Y	Y	Y
Kinase	SKM1	Y	Y	Y
Kinase	SKS1	Y	Y	Y
Kinase	SKY1	Y	Y	Y
Kinase	SLN1	Y
Kinase	SLT2	Y	Y	Y
Kinase	SMK1	Y	Y	Y
Kinase	SNF1	Y	Y	Y
Kinase	SPS1	Y	Y	Y
Kinase	SSK2	Y	Y	Y
Kinase	SSK22	Y	Y	Y
Kinase	SSN3	Y	Y	Y
Kinase	STE11	Y	Y	Y
Kinase	STE20	Y	Y	Y
Kinase	STE7	Y	Y	Y
Kinase	SWE1	Y	Y	Y
Kinase	TDA1	Y	Y	Y
Kinase	TEL1	Y
Kinase	TOR1	Y
Kinase	TOR2	Y
Kinase	TOS3	Y	Y	Y
Kinase	TPK1	Y	Y	Y
Kinase	TPK2	Y	Y	Y
Kinase	TPK3	Y	Y	Y
Kinase	VHS1	Y	Y	Y
Kinase	VPS15	Y	Y	Y
Kinase	YAK1	Y	Y	Y
Kinase	YCK1	Y	Y	Y
Kinase	YCK2	Y	Y	Y
Kinase	YCK3	Y	Y	Y
Kinase	YGK3		Y	Y
Kinase	YPK1	Y	Y	Y
Kinase	YPK2	Y	Y	Y
Kinase	YPK3		Y	Y
Kinase	YPL150W	Y	Y	Y
Phosphatase	CDC1		Y	Y
Phosphatase	CDC14	Y	Y	Y
Phosphatase	CDC55	Y
Phosphatase	CMP2		Y	Y
Phosphatase	CNA1	Y	Y	Y
Phosphatase	CYR1			Y
Phosphatase	DBR1		Y	Y
Phosphatase	DCR2	Y	Y	Y
Phosphatase	DET1	Y
Phosphatase	GLC7	Y	Y	Y
Phosphatase	LTP1	Y
Phosphatase	MIH1	Y
Phosphatase	MRE11		Y	Y
Phosphatase	MSG5	Y	Y	Y
Phosphatase	PPG1		Y	Y
Phosphatase	PPH21	Y	Y	Y
Phosphatase	PPH22	Y	Y	Y
Phosphatase	PPH3	Y	Y	Y
Phosphatase	PPN1		Y	Y
Phosphatase	PPN2		Y	Y
Phosphatase	PPQ1	Y	Y	Y
Phosphatase	PPS1	Y	Y	Y
Phosphatase	PPT1	Y	Y	Y
Phosphatase	PPZ1	Y	Y	Y
Phosphatase	PPZ2	Y	Y	Y
Phosphatase	PSR1	Y
Phosphatase	PSY2	Y
Phosphatase	PTC1	Y	Y	Y
Phosphatase	PTC2	Y	Y	Y
Phosphatase	PTC3	Y	Y	Y
Phosphatase	PTC4	Y	Y	Y
Phosphatase	PTC5	Y	Y	Y
Phosphatase	PTC6	Y	Y	Y
Phosphatase	PTC7	Y		Y
Phosphatase	PTP1	Y	Y	Y
Phosphatase	PTP2	Y	Y	Y
Phosphatase	PTP3	Y	Y	Y
Phosphatase	RTR1	Y
Phosphatase	SDP1	Y	Y	Y
Phosphatase	SIA1			Y
Phosphatase	SIT4	Y	Y	Y
Phosphatase	SIW14		Y
Phosphatase	SSU72	Y
Phosphatase	TED1		Y	Y
Phosphatase	TEP1		Y	Y
Phosphatase	YCH1	Y
Phosphatase	YHR202W		Y
Phosphatase	YMR027W	Y
Phosphatase	YNL108C	Y
Phosphatase	YOR072W-B		Y
Phosphatase	YOR283W	Y
Phosphatase	YVH1	Y	Y	Y
